# Supplementary material for: Epigenomic and genomic analysis of transcriptome modulation in skin cutaneous melanoma
Source: Aging (Albany NY). 2020 Jul 7;12(13):12703–25. doi: 10.18632/aging.103115 (PMC7377867; doi:10.18632/aging.103115)
Supplement: Supplementary Table 1 [file aging-12-103115-s012..xlsx]

## Sheet: S1_Table
Supplementary Table 1. TCGA-SKCM CNV, Methylation (MET) and RNA-seq (EXP) data included for multi-omics analysis.
Column1	Column2	Column3	Column4	Column5	Column6	Column7	Column8	Column9	Column10	Column11	Column12	Column13	Column14
A0_Samples	A1_OS	A2_Event	T	N	M	Stage	NewEvent	NewEventTime	drugs.drug.drug_name	Response	TherapyType	Gender	PrimarySite
TCGA-EE-A2M5	659	Dead	T2	N0	M0	Stage I	1	-1	PNU-159548	PD	Chemotherapy	MALE	Trunk
TCGA-ER-A3ET	2829	Dead	T3a	N1a	M0	Stage IIIA	1	2435				FEMALE	NA
TCGA-W3-A825	1917	Dead	T3	N0	M0	Stage II	1	-1	Cisplatin;Vinblastine;Dacarbazine;Tamoxifen;Interleukin-2;Interferon-浼?	PR;PR;PR;PR;PR;PR	Chemotherapy;Chemotherapy;Chemotherapy;Chemotherapy;Immunotherapy;Immunotherapy	FEMALE	Extremities
TCGA-WE-A8K4	614	Alive	T4a	NX	M0	Stage IIB	0	614				MALE	Extremities
TCGA-EB-A24C	632	Alive	T4b	NX	M0		1	465	Dacarbazine;Laferon;Carboplatin;Temozolomide;Laferon;Dacarbazine;Cisplatin	NA;NA;NA;NA;NA;NA;NA	Chemotherapy;Immunotherapy;Chemotherapy;Chemotherapy;Immunotherapy;Chemotherapy;Chemotherapy	MALE	Trunk
TCGA-DA-A1I1	6768	Alive	T0	N2a	M0	Stage III	1	5591	Pembrolizumab	NA	Immunotherapy	MALE	NA
TCGA-EB-A3XF	278	Alive	T4b	N0	M0	Stage IIC	0	278				MALE	Trunk
TCGA-D3-A8GQ	884	Dead	T3	N0	M0	Stage II	1	-1				MALE	Trunk
TCGA-D9-A6E9	301	Alive	T3a	N1	M0	Stage IIIA	0	301				FEMALE	Extremities
TCGA-EE-A185	151	Dead	T4b	N3	M0	Stage IIIC	1	-1	Dacarbazine	PD	Chemotherapy	FEMALE	Extremities
TCGA-EE-A3J5	1124	Dead	T4a	N1	M0	Stage III	1	-1				MALE	Extremities
TCGA-EE-A2M6	3932	Alive	T1	N0	M0	Stage I	1	-1	NA	NA	Vaccine	MALE	Trunk
TCGA-EB-A6QY	382	Alive	T4b	N0	M0	Stage IIC	1	36	Carboplatin;Dacarbazine;Laferon	CP;CP;CP	Chemotherapy;Chemotherapy;Immunotherapy	MALE	Trunk
TCGA-EB-A3Y6	126	Alive	T4b	N0	M0	Stage IIC	0	126	Dacarbazine	CP	Chemotherapy	FEMALE	Extremities
TCGA-D3-A3C6	1766	Dead	T2a	N0	M0	Stage IB	1	-1				FEMALE	Extremities
TCGA-EE-A29Q	2030	Dead	T3b	N0	M0	Stage IIB	1	1256	Dacarbazine	PD	Chemotherapy	FEMALE	Extremities
TCGA-D3-A3MR	3151	Alive	T0	N1b	M0	Stage III	1	3108				MALE	NA
TCGA-D3-A8GK	5177	Alive	T3a	N0	M0	Stage IIA	1	1555	MEL-44	CP	Vaccine	MALE	Extremities
TCGA-D3-A3C8	1409	Alive	TX	N3	M0	Stage IIIC	1	-1				FEMALE	Head and Neck
TCGA-GN-A26D	1460	Dead	T4b	N0		Stage IIC	1	1420	NA	CP	NA	FEMALE	Extremities
TCGA-EE-A20H	5118	Dead	T2	N0	M0	Stage I	1	-1				MALE	Extremities
TCGA-D3-A8GM	3259	Dead	T3b	N0	M0	Stage IIB	1	-1				MALE	Trunk
TCGA-WE-A8K6	546	Alive	TX	N1b	M0	Stage IIIB	1	272	Vemurafenib	NA	Chemotherapy	MALE	Trunk
TCGA-EB-A430			T4b	N0	M0	Stage IIC	0					MALE	Trunk
TCGA-GN-A4U4	1197	Alive	T2b	NX	M0	Stage IIA	1	217	Axitinib;Ipilimumab	PR;PR	Chemotherapy;Immunotherapy	MALE	Trunk
TCGA-EE-A2GO	3857	Alive	T3b	N0	M0	Stage II	1	2216				FEMALE	Extremities
TCGA-ER-A19P	4930	Dead		N0	M0		1	4352				FEMALE	Extremities
TCGA-EE-A2GC	2051	Alive	T3b	N0	M0	Stage IIB	1	-1				MALE	Head and Neck
TCGA-D3-A3C7	1429	Alive	T0	N1b	M0	Stage III	1	-1	Interferon	NA	Immunotherapy	FEMALE	NA
TCGA-WE-AAA3	651	Alive	T4b	N2b	M0	Stage IIIC	1	-1				FEMALE	Extremities
TCGA-GF-A6C9	480	Alive				Stage IIIB	0	480				MALE	NA
TCGA-BF-A1PX	282	Dead	T4b	N2a	M0	Stage IIIB	0	282				MALE	Trunk
TCGA-FS-A4F4	2028	Dead	T3a	N0	M0	Stage II	1	-1				MALE	Extremities
TCGA-EE-A20B	4070	Alive	T3	N0	M0	Stage II	1	-1				FEMALE	Extremities
TCGA-FS-A1ZF	470	Dead	T4b	N0	M0	Stage IIC	1	-1				FEMALE	Extremities
TCGA-D3-A51H	1714	Alive	T1b	N3	M0	Stage IIIC	1	838	Cisplatin;Vinblastine;Dacarbazine	CP;CP;CP	Chemotherapy;Chemotherapy;Chemotherapy	MALE	Trunk
TCGA-GF-A6C8	62	Alive	T3b	NX	M0	Stage IIB	1	-1				FEMALE	Extremities
TCGA-ER-A42H	426	Dead					1	259				MALE	NA
TCGA-EB-A3XB	796	Alive	T4	NX	M0	Stage II	0	796				MALE	Trunk
TCGA-D3-A5GR	5424	Alive	T1b	N1	M0	Stage III	1	0				FEMALE	Extremities
TCGA-EB-A44P	741	Alive	T4b	N0	M0	Stage IIC	0	741				FEMALE	Trunk
TCGA-DA-A1HW	1096	Dead	T1a	N1b	M0	Stage IIIB	1	852				FEMALE	Trunk
TCGA-EB-A5UN	1792	Alive	T4b	NX	M0	Stage IIC	1	1689				MALE	Trunk
TCGA-ER-A19K	469	Dead	T4b	N0	M0	Stage IIC	1	-1	Temozolomide	CP	Chemotherapy	FEMALE	Head and Neck
TCGA-BF-A3DJ	464	Alive	T4b	N1	M0	Stage IIIB	1	217				FEMALE	Extremities
TCGA-D3-A2J7	3136	Dead	T3b	N1b	M0	Stage IIIC	1	-1				MALE	Trunk
TCGA-ER-A19F	802	Dead		N0	M0		0	802				MALE	Extremities
TCGA-ER-A19C	1487	Dead	T2a	NX	M0	Stage I	0	1487				MALE	Trunk
TCGA-GN-A264	3587	Dead					1	3221	Interferon alfa-2b	CP	Immunotherapy	MALE	Extremities
TCGA-FS-A4FD	2454	Dead	T2	N3	M0	Stage IIIC	1	2010				MALE	Trunk;NA
TCGA-EE-A2M8	601	Dead	T3a	N1	M0	Stage III	1	498				FEMALE	Extremities
TCGA-EB-A44Q	422	Alive	TX	N3	M0	Stage IIIC	1	-1				FEMALE	Extremities
TCGA-EB-A5SG	2076	Alive					1	1372				FEMALE	Extremities
TCGA-ER-A2ND	710	Dead	T1b	N3	M0	Stage IIIC	0	710				FEMALE	Extremities
TCGA-EB-A44R	315	Dead	TX	N2b	M0	Stage IIIB	1	-1				MALE	Extremities
TCGA-GN-A26A	988	Dead	T3a	N1a	M0	Stage IIIA	1	-1				FEMALE	Trunk
TCGA-D3-A51K	1002	Alive	Tis	N2b	M0	Stage IIIB	1	-1				MALE	Extremities
TCGA-FS-A1ZP	2273	Dead	T3	N0	M0	Stage II	0	2273				MALE	Extremities
TCGA-EE-A20I	412	Dead	TX	N0	M1c	Stage IV	1	-1				MALE	Extremities
TCGA-EE-A2MF	8174	Dead	T2	N0	M0	Stage I	1	-1				FEMALE	Extremities
TCGA-ER-A19O			T3b	N1b	M0	Stage IIIB	1	-1	Interferon	CP	Immunotherapy	MALE	Trunk
TCGA-D3-A3ML	422	Dead	T3a	N2a	M0	Stage IIIA	1	-1				MALE	Head and Neck
TCGA-D3-A1Q8	854	Dead	T0	N3	M1b	Stage IV	1	-1				MALE	NA
TCGA-D9-A4Z3	505	Alive	T4b	N1b	M0	Stage IIIC	1	100				FEMALE	Extremities
TCGA-D3-A3BZ	3976	Alive	T4a	N0	M0	Stage IIB	1	2340				MALE	Head and Neck
TCGA-EE-A2GE	5286	Alive	T2	N0	M0	Stage I	1	5276				MALE	Trunk
TCGA-EE-A3JD	832	Dead	TX	N2b	M0	Stage III	1	-1				MALE	NA
TCGA-FW-A5DY	587	Alive	T3	N1		Stage III	0	587				FEMALE	Trunk
TCGA-ER-A197	424	Dead	T4b	N1a	M0	Stage IIIB	1	110				FEMALE	NA
TCGA-BF-A5EQ	323	Alive	T4b	N0	M0	Stage IIC	0	323				MALE	Trunk
TCGA-EE-A2MC	1871	Dead	T2	N0	M0	Stage I	1	-1				MALE	Extremities
TCGA-D3-A8GJ	7342	Alive	T3	N0	M0	Stage II	1	1443				MALE	Head and Neck
TCGA-FS-A1ZJ	1441	Dead	T2	N0	M0	Stage I	1	1225				FEMALE	Trunk
TCGA-D3-A2JC	2639	Alive	T0	N2b	M0	Stage III	0	2639	Interferon alfa	NA	Immunotherapy	FEMALE	NA
TCGA-EE-A2MQ	1315	Dead	T3a	N2a	M0	Stage IIIA	1	-1	Dacarbazine	PD	Chemotherapy	FEMALE	Trunk
TCGA-D9-A1X3	551	Alive	T4b	N2b			0	551				MALE	Extremities
TCGA-ER-A195	1078	Dead	TX	N0	M0		0	1078	interferon	CP	Immunotherapy	MALE	Trunk
TCGA-ER-A19D	383	Dead	T2a	N0	M0	Stage IB	1	-1				FEMALE	Trunk
TCGA-RP-A690	6	Alive					0	6				FEMALE	NA
TCGA-EB-A44N	205	Dead	T4b	N0	M0	Stage IIC	1	115				MALE	Extremities
TCGA-EE-A29W	5932	Alive	Tis	N0	M0	Stage 0	1	-1				MALE	Extremities
TCGA-EE-A180	2889	Dead	T4a	N0	M0	Stage III	1	-1				MALE	Trunk
TCGA-ER-A3ES	7514	Dead					0	7514				MALE	Extremities
TCGA-D3-A51F	1695	Alive	T4b	N1b	M0	Stage IIIC	1	-1				MALE	Extremities
TCGA-D9-A148	4609	Alive	TX	N3	M1b		1	4287	ipilimumab	CP	Immunotherapy	MALE	Trunk
TCGA-D3-A3C3			TX	N0	M0		1	-1				FEMALE	Trunk
TCGA-DA-A95V	2193	Alive	T4b	N0		Stage IIC	0	2193				FEMALE	Head and Neck
TCGA-W3-AA21	3195	Dead	T2	N0	M0	Stage I	1	2952	Taxol;Temodar;NA	PD;PD;NA	Chemotherapy;Chemotherapy;Immunotherapy	MALE	Extremities
TCGA-D3-A8GD	718	Alive	T4b	N3	M0	Stage IIIC	1	-1				FEMALE	Extremities
TCGA-D9-A3Z4	519	Dead	T4b	N3	M0	Stage IIIC	1	192				MALE	Unknown
TCGA-D3-A8GE	804	Alive	TX	N0	M1b	Stage IV	1	59				MALE	NA
TCGA-EE-A2A2	1814	Alive	T4b	N1b	M0	Stage IIIC	1	-1				MALE	Trunk
TCGA-EB-A4IQ	636	Dead	T4b	N1	M0	Stage IIIB	1	337				FEMALE	Trunk
TCGA-EB-A3HV	39	Alive	T4b	N0	M0	Stage IIC	0	39				MALE	Trunk
TCGA-DA-A1I8	1640	Dead	T4b	N0	M0	Stage IIC	1	961				FEMALE	Extremities
TCGA-BF-A3DN	717	Alive	T3b	N3	M0	Stage IIIC	0	717				FEMALE	Extremities
TCGA-EB-A6R0	608	Dead	T4b	N0	M0	Stage IIC	0	608	Lomustine	CP	Chemotherapy	FEMALE	Trunk
TCGA-GN-A269	170	Dead	T4b	N3	M0	Stage IIIC	0	170				MALE	Trunk
TCGA-3N-A9WD	395	Dead	T2a	N1a	M0	Stage IIIA	1	306				MALE	NA
TCGA-D3-A1Q1	504	Dead	T1b	N3	M0	Stage IIIC	1	-1	Cyclophosphamide;NA;NA	PD;PD;PD	Chemotherapy;Immunotherapy;Vaccine	FEMALE	Extremities
TCGA-ER-A42L	4533	Alive	T3	N0	M0	Stage II	1	3812				MALE	NA
TCGA-D3-A2J9	723	Dead	T4b	N3	M0	Stage IIIC	1	-1				MALE	Trunk;Extremities
TCGA-XV-A9W2	417	Alive	T1	N0	M0	Stage I	0	417				MALE	Extremities
TCGA-EE-A3JH	4086	Alive	T2	N0	M0	Stage IB	1	3309				MALE	Trunk
TCGA-GN-A8LK	1524	Dead	T1b	NX		Stage IB	1	-1	Ipilimumab;Carboplatin;Dacarbazine	PD;PD;PD	Chemotherapy;Chemotherapy;Chemotherapy	MALE	Head and Neck
TCGA-EE-A2MP	7563	Alive	T2	N0	M0	Stage I	1	-1				FEMALE	Extremities
TCGA-D3-A51R	1941	Alive	T3a	N0	M0	Stage IIA	1	1016				MALE	Extremities
TCGA-D3-A5GL	3826	Alive	T2a	N0	M0	Stage IB	1	1092				MALE	Extremities
TCGA-FR-A44A	5299	Alive	T3a	N0	M0	Stage II	1	-1	Interferon	CP	Immunotherapy	FEMALE	Extremities
TCGA-DA-A3F3	319	Dead	T0	N2b	M0	Stage IIIB	1	-1				MALE	NA
TCGA-RP-A693	10	Alive	TX	NX	M1c	Stage IV	0	10				MALE	NA
TCGA-EB-A5SE	401	Dead	T3b	NX	M0	Stage IIB	1	367				MALE	Trunk
TCGA-DA-A1I7	2703	Alive	T0	N2b	M0	Stage IIIB	1	755				MALE	NA
TCGA-ER-A19L	4000	Dead					1	-1				MALE	Extremities
TCGA-ER-A193	955	Dead	T3b	N0	M0	Stage IIB	1	806				MALE	Head and Neck
TCGA-WE-A8ZX	1089	Alive	TX	N1b	M0	Stage IIIB	1	326				MALE	NA
TCGA-EE-A2ME	3141	Dead	T2	N0	M0	Stage I	1	-1	Cancer Vax	PD	Vaccine	MALE	Trunk
TCGA-EB-A5VU	321	Dead	T4b	N1	M0	Stage IIIB	1	217				MALE	Extremities
TCGA-FS-A1YX	1478	Dead	T2	N0	M0	Stage I	1	-1				FEMALE	Trunk
TCGA-DA-A1IB	1235	Dead	T2b	N2b	M0	Stage IIIC	1	243				FEMALE	Extremities
TCGA-D3-A2JD	361	Dead	T4b	N1b	M0	Stage IIIC	1	-1				MALE	Extremities
TCGA-FR-A7UA	1164	Alive	T2a	N0	M0	Stage IB	1	-1				FEMALE	Extremities
TCGA-ER-A3PL	1010	Alive	T3b	N0	M1a	Stage IV	1	945				MALE	Extremities
TCGA-GN-A267	1960	Dead	T4a	N1a	M0	Stage IIIA	1	-1	Temodar	CP	Chemotherapy	MALE	Trunk
TCGA-BF-A5EO	703	Alive	T4b	N0	M0	Stage IIC	0	703				MALE	Trunk
TCGA-XV-AAZW	393	Dead	T4	N0	M0	Stage II	1	-1				FEMALE	Extremities
TCGA-EE-A2GR	1301	Dead	T4	N0	M0	Stage II	1	-1				MALE	Extremities;Extremities
TCGA-D3-A51E	5318	Alive	T2	N0	M0		1	-1	Actinomycin-D;Melphalan	CP;CP	Chemotherapy;Chemotherapy	FEMALE	Extremities
TCGA-GN-A265	2948	Alive					1	99				MALE	NA
TCGA-EE-A29E	1940	Alive	T3a	N1b	M0	Stage IIIB	1	-1				MALE	Extremities
TCGA-D3-A8GL	2711	Dead	T2a	N1b	M0	Stage IIIB	1	-1				MALE	Extremities
TCGA-D3-A5GU	3808	Alive	T1b	N0	M0	Stage IB	1	-1				MALE	Extremities
TCGA-FW-A3TU	1691	Dead					1	-1				FEMALE	Trunk
TCGA-FR-A69P	478	Alive	TX	N3		Stage IIIC	1	274	Ipilimumab	CP	Immunotherapy	FEMALE	NA
TCGA-ER-A2NF	877	Dead	T3b	N3	M0	Stage IIIB	1	230	IL-2;Aflibercept;Ipilimumab	CP;CP;CP	Immunotherapy;Chemotherapy;Immunotherapy	MALE	Head and Neck
TCGA-EB-A57M	472	Dead	T4b	N1	M0	Stage IIIB	0	472	Cisplatin;Vinblastine;Zofran;Dexamethasone;Dacarbazine;Erythropoietin;Ciclosporin;RenAmin	CP;CP;CP;CP;CP;CP;CP;CP	Chemotherapy;Chemotherapy;Ancillary;Ancillary;Chemotherapy;Ancillary;Immunotherapy;Ancillary	MALE	Extremities
TCGA-D3-A8GN	4897	Alive	TX	N0	M0		1	787	NA	CP	Immunotherapy	FEMALE	NA
TCGA-FS-A1ZD	1628	Dead	T2b	N0	M0	Stage IIA	1	1497				MALE	Extremities
TCGA-EE-A29D	425	Dead	T3b	N1b	M0	Stage IIIC	0	425				MALE	Head and Neck
TCGA-EB-A5UM	779	Alive	T4b	N0	M0	Stage IIC	0	779				FEMALE	Trunk
TCGA-ER-A2NH	1264	Alive	T3a	N3	M0	Stage IIIC	1	-1				MALE	Trunk
TCGA-EB-A3Y7	326	Dead	T3a	N2c	M0	Stage IIIB	0	326				FEMALE	Head and Neck
TCGA-3N-A9WB	518	Dead	T1a	NX	M0	Stage IA	1	-1				MALE	Trunk
TCGA-D3-A2JO	2010	Alive	TX	N3	M0	Stage IIIC	1	2010				FEMALE	Extremities
TCGA-EE-A3J4	3869	Dead	T3a	N0	M0	Stage II	1	-1				MALE	Extremities
TCGA-FR-A729	6716	Alive	T1	N0	M0	Stage I	1	6299	Sylatron	NA	Immunotherapy	FEMALE	Trunk
TCGA-EE-A29T	11252	Alive	TX	NX	M0		1	10888	Vemurafenib	NA	TargetedTherapy	FEMALE	Trunk
TCGA-D3-A2JN	2022	Dead	T0	N1b	M0	Stage III	1	-1	Interferon-alfa	NA	Immunotherapy	FEMALE	NA
TCGA-D3-A5GO	4195	Alive	T4	N0	M0	Stage II	1	-1				MALE	Head and Neck
TCGA-EE-A29N	566	Dead	TX	N0	M0		1	-1				MALE	Trunk
TCGA-D3-A2JK	368	Dead	T4b	N2b	M0	Stage IIIC	1	-1				MALE	Trunk
TCGA-D9-A1JW	111	Alive	T1a	N2a	M0		1	10				MALE	Head and Neck
TCGA-BF-A3DM	601	Alive	T2b	N0	M0	Stage IIA	0	601				MALE	Trunk
TCGA-ER-A2NB	857	Dead	T4b	N2	M0	Stage IIIB	1	461				MALE	NA
TCGA-DA-A95Y	430	Dead	T4b	N0	M0	Stage IIC	1	338				MALE	Trunk
TCGA-W3-AA1Q	2101	Dead	TX	N1	M0	Stage III	1	-1	Tamoxifen;Herceptin;Interferon;NA;Gemcitabine;NA	PD;PD;PD;PD;PD;PD	Hormone Therapy;TargetedTherapy;Immunotherapy;Immunotherapy;Chemotherapy;Vaccine	MALE	NA
TCGA-D3-A51J	4414	Alive	T0	N1b	M0	Stage III	1	2008				MALE	NA
TCGA-EE-A2MD	1438	Dead	T3a	N0	M0	Stage II	1	-1	Dacarbazine	PD	Chemotherapy	MALE	Extremities
TCGA-WE-A8ZY	1506	Dead	T3a	NX	M0	Stage IIA	1	1389				MALE	Trunk
TCGA-EE-A2A0	1424	Dead	T3a	N0	M0	Stage IIA	1	-1				FEMALE	Extremities
TCGA-D3-A51G			Tis	N0	M0	Stage 0	1	-1	Melphalan;Actinomycin-D;GP100;Resiquimod	CP;CP;CP;CP	Chemotherapy;Chemotherapy;Vaccine;Ancillary	MALE	Trunk
TCGA-OD-A75X	9061	Dead	TX	NX	M0		1	8987				MALE	Trunk
TCGA-EE-A2GP	423	Dead	T4b	N1a	M0	Stage IIIB	1	-1				MALE	Extremities
TCGA-D9-A6EC	2359	Alive	T3a	N1	M0	Stage IIIA	0	2359				MALE	Trunk
TCGA-D3-A2J6	1321	Dead	T3b	N0	M0	Stage IIB	1	-1				MALE	Extremities
TCGA-EE-A2GB	1803	Alive	T2b	N1a	M0	Stage IIIB	1	-1				MALE	Trunk
TCGA-EE-A2MU	1620	Alive	T1a	N0	M0	Stage IA	1	-1				MALE	Extremities
TCGA-FS-A4F2	1525	Dead	T4b	N0	M0	Stage IIC	1	-1				FEMALE	Head and Neck
TCGA-GN-A263	467	Dead	T4b	N3	M1c	Stage IV	1	39				MALE	Trunk
TCGA-FW-A3TV	411	Alive	T1	N2b	M0	Stage IIIB	1	139	Interferon;Interferon	PD;NA	Immunotherapy;Immunotherapy	FEMALE	Trunk
TCGA-ER-A19A	2365	Alive	TX	N0	M1	Stage IV	1	1617				MALE	NA
TCGA-EE-A29L	79	Dead	T4b	N3	M0	Stage IIIC	1	-1				MALE	Extremities
TCGA-ER-A196	1785	Alive	T4b	N0	M0	Stage IIC	0	1785				FEMALE	Extremities
TCGA-FS-A1ZR	347	Dead	T2	N0	M0	Stage II	1	152				MALE	Trunk
TCGA-YD-A9TB							1	-1				FEMALE	Head and Neck
TCGA-FR-A3YN	2828	Alive	T2a	N0	M0	Stage IB	1	-1	Ipilimumab	CP	Immunotherapy	MALE	Extremities
TCGA-RP-A694	21	Alive	TX	NX	M1c	Stage IV	0	21				MALE	NA
TCGA-FR-A726	0	Alive	T4b	N0	M0	Stage IIC	1	0				MALE	Head and Neck
TCGA-EE-A2GI	1482	Alive	T1a	N0	M0	Stage IA	1	-1	NA;NA	NA;NA	Vaccine;Vaccine	MALE	Extremities
TCGA-RP-A6K9							1	-1				FEMALE	Unknown
TCGA-ER-A19N	1341	Dead					1	0	Interferon	CP	Immunotherapy	MALE	NA
TCGA-EE-A29V	787	Dead	T3b	N1b	M0	Stage IIIC	1	-1	Dacarbazine	PD	Chemotherapy	MALE	Head and Neck
TCGA-D3-A8GS	3564	Dead	T1	N0	M0	Stage I	1	-1				MALE	Trunk
TCGA-DA-A1I4	1093	Dead	T3b	N2b	M0	Stage IIIC	1	889				MALE	Trunk
TCGA-EB-A42Z	441	Alive	T4b	N1b	M0	Stage IIIC	0	441				MALE	Extremities
TCGA-EE-A2MT	2166	Alive	T2a	N0	M0	Stage IB	1	-1				MALE	Trunk
TCGA-EE-A3JA	1618	Dead	T2a	N0	M0	Stage IB	1	-1				MALE	Extremities
TCGA-BF-A1PZ	853	Alive	T4a	N0	M0	Stage IIB	0	853				FEMALE	Extremities
TCGA-D3-A8GO			T2	N0	M0		1	-1				FEMALE	Extremities
TCGA-EB-A85I	362	Alive	T4b	N0	M0	Stage IIC	0	362				MALE	Trunk
TCGA-EB-A5SH	1643	Alive	T4	N0	M0	Stage III	1	1065	Dacarbazine;Cisplatin;Interferon alpha	CP;CP;CP	Chemotherapy;Chemotherapy;Immunotherapy	FEMALE	Extremities
TCGA-EE-A17X	907	Dead	T1a	N0	M0	Stage IA	1	531				MALE	Trunk
TCGA-BF-A5ER	327	Alive	T4b	N0	M0	Stage IIC	0	327				MALE	Trunk
TCGA-BF-A1PV	14	Alive	T4b	N0	M0	Stage IIC	0	14				FEMALE	Trunk
TCGA-ER-A19B	2993	Dead	TX	N0	M0		1	-1				MALE	Trunk
TCGA-D3-A5GT	487	Alive	T2b	N3	M0	Stage IIIC	1	291	Interferon alpha	NA	Immunotherapy	MALE	Trunk
TCGA-Z2-A8RT	839	Alive	T3b	N0	M0	Stage IIB	1	-1	NA	CP	TargetedTherapy	FEMALE	Extremities
TCGA-EB-A51B	931	Alive	T4b	NX	M0	Stage IIC	0	931				MALE	Trunk
TCGA-DA-A1I2	5370	Dead	T4b	N2b	M0	Stage III	1	4679				MALE	Trunk
TCGA-BF-AAOU	476	Alive	T4b	N0	M0	Stage IIC	0	476				FEMALE	Trunk
TCGA-EE-A29X	545	Dead	T2a	N0	M0	Stage IB	1	-1	Fotemustine	NA	Chemotherapy	FEMALE	Head and Neck
TCGA-EE-A29B	2588	Dead	T3b	N0	M0	Stage IIB	1	-1				MALE	Extremities
TCGA-D9-A3Z1	468	Dead	T2a	N3	M0	Stage IIIC	1	335				MALE	Unknown
TCGA-EE-A2GN	3106	Dead	T2b	N0	M0	Stage IIA	1	3050				MALE	Trunk
TCGA-DA-A95Z	396	Alive	TX	N0	M1a	Stage IV	1	-1				MALE	NA
TCGA-EE-A2A1	3527	Alive	T2a	N0	M0	Stage IB	1	3488				MALE	Extremities
TCGA-D3-A3MV	1378	Alive	T2b	N2a	M0	Stage IIIB	1	16	Interleukin-2	PD	Immunotherapy	FEMALE	Extremities
TCGA-FS-A1ZN	730	Dead	T4b	N1a	M0	Stage IIIA	1	361				MALE	Trunk
TCGA-D3-A2JF	1888	Alive	T1a	N0	M0	Stage IA	1	-1				MALE	Extremities;Trunk
TCGA-D3-A2JE	841	Dead	TX	N3	M0	Stage IIIC	1	-1				FEMALE	Trunk
TCGA-EE-A17Y	828	Dead	T3b	N1a	M0	Stage IIIB	1	-1				MALE	Trunk
TCGA-EE-A3JB	6138	Alive	T3a	N1	M0	Stage III	1	1434	Alkeran	NA	Chemotherapy	FEMALE	Extremities
TCGA-FS-A1ZZ	822	Dead	T3b	N0	M0	Stage IIB	0	822				FEMALE	Trunk
TCGA-FS-A1YW	6598	Dead	T1b	N0	M0	Stage IB	0	6598				MALE	Trunk
TCGA-FS-A1ZY	824	Dead	T3b	N0	M0	Stage IIB	1	-1				MALE	Trunk
TCGA-WE-A8K5	1860	Dead	T2a	N3	M1c	Stage IV	1	1498	ipilimumab	PD	Chemotherapy	MALE	Extremities
TCGA-WE-A8K1	1492	Alive	T3b	N3	M0	Stage IIIC	1	-1				MALE	Extremities
TCGA-HR-A2OH	2004	Dead	T3b	N2a	M0	Stage IIIB	1	-1	Interferon;Dacarbazine;Interleukin - 2	CP;PD;PD	Immunotherapy;Chemotherapy;Immunotherapy	FEMALE	Extremities
TCGA-EB-A44O	81	Alive	T4a	N0	M0	Stage IIB	1	60				MALE	Trunk
TCGA-EB-A4XL	777	Alive	T4b	NX	M0	Stage IIC	0	777				FEMALE	Extremities
TCGA-D3-A3CC	2644	Alive	T4b	N0	M0	Stage IIC	1	2561				FEMALE	NA
TCGA-DA-A3F8	1319	Alive	T2a	N2b	M0	Stage IIIB	1	-1				MALE	Head and Neck
TCGA-FR-A8YC	1059	Dead	T3b	N0	M0	Stage IIB	1	-1	2B3-101	PD	Chemotherapy	MALE	Extremities
TCGA-DA-A1I0	620	Dead	T4b	N3	M1a	Stage IV	1	599				MALE	Trunk
TCGA-EE-A3AD	875	Dead	T0	N1b	M0	Stage III	1	554	BRAF inhibitor	PD	TargetedTherapy	MALE	NA
TCGA-FR-A728	583	Alive	T4b	N2a	M0	Stage IIIB	1	64	Dabrafenib;Trametinib	PR;PR	Chemotherapy;Chemotherapy	FEMALE	Extremities
TCGA-EE-A29S	1864	Dead	T3a	N0	M0	Stage IIA	1	-1				MALE	Extremities
TCGA-ER-A19T	270	Dead	T4a	N3	M1a	Stage IV	1	118				MALE	Extremities
TCGA-D9-A3Z3	678	Alive	T3a	N1b	M0	Stage IIIB	0	678				FEMALE	Unknown
TCGA-D3-A8GI	1780	Dead	T1a	N0	M0	Stage IA	1	-1				MALE	Trunk
TCGA-EE-A29R	440	Alive	T3b	N1b	M0	Stage IIIC	1	-1				FEMALE	Head and Neck
TCGA-GF-A3OT	301	Alive	T3	N3	M0	Stage IIIC	1	248	Carboplatin;Taxol;Avastin;Yervoy	PD;PD;PD;PD	Chemotherapy;Chemotherapy;Chemotherapy;Immunotherapy	FEMALE	Extremities
TCGA-ER-A19Q	1548	Dead		N0	M0		1	-1	Dacarbazine;IL-18	CP;CP	Chemotherapy;Immunotherapy	FEMALE	Extremities
TCGA-DA-A3F5	6873	Dead	T1a	N0	M0	Stage I	1	6841	Vemurafenib;Pembrolizumab	PD;SD	TargetedTherapy;Immunotherapy	MALE	Trunk
TCGA-EE-A2GL	2423	Alive	T3a	N0	M0	Stage IIA	1	2329	NA;NA	NA;NA	Vaccine;Vaccine	FEMALE	Extremities
TCGA-EE-A2MN	1446	Dead	T2	N0	M0	Stage I	1	-1	Dacabarzine	PD	Chemotherapy	MALE	Trunk
TCGA-LH-A9QB	11217	Alive					1	-1				FEMALE	Trunk
TCGA-WE-AAA4	760	Alive	TX	N3	M0	Stage IIIC	1	419	melphalan;vemurafenib;Dabrafenib;ipilimumab	CP;NA;NA;NA	Chemotherapy;Chemotherapy;Chemotherapy;Immunotherapy	FEMALE	Extremities
TCGA-EE-A181	1026	Dead	T3	N0	M0	Stage II	1	788				FEMALE	Extremities
TCGA-EB-A5SF	369	Dead	T4b	NX	M0	Stage IIC	0	369				FEMALE	Extremities
TCGA-EB-A431	568	Alive	T4b	N0	M0	Stage IIC	0	568				MALE	Extremities
TCGA-EB-A5UL	891	Alive	TX	N1	M0	Stage III	1	-1	Dacarbazine;Vinblastine;Bleomycin	CP;CP;CP	Chemotherapy;Chemotherapy;Chemotherapy	MALE	Trunk
TCGA-EE-A3AE	1658	Alive	T1a	N0	M0	Stage IA	1	-1	Mage A3	NA	Vaccine	FEMALE	Extremities
TCGA-EB-A3XE	180	Alive	T3a	N0	M0	Stage IIA	0	180				FEMALE	Trunk
TCGA-D3-A1QB	2912	Alive	T0	N2c	M0	Stage III	1	-1				FEMALE	NA
TCGA-EB-A6L9	1109	Alive	TX	N3	M0	Stage IIIC	1	-1				MALE	Extremities
TCGA-YG-AA3O	1154	Dead					1	999	Yervoy;Interferon	NA;PR	Immunotherapy;Immunotherapy	MALE	Trunk
TCGA-D3-A3MO	284	Dead	TX	N2c	M0	Stage III	1	-1				MALE	Trunk
TCGA-GN-A9SD	1807	Dead	T1a	NX	M0	Stage IA	1	-1	actinomycin d;melphalan;vemurafenib;melphalan	PD;PD;PD;PD	Chemotherapy;Chemotherapy;Chemotherapy;Chemotherapy	FEMALE	Extremities
TCGA-BF-AAP8	447	Alive	T4b	N0	M0	Stage IIC	0	447				MALE	Extremities
TCGA-EE-A2MR	4088	Alive	T2	N0	M0	Stage I	1	3773				MALE	Trunk
TCGA-FS-A1ZG	295	Dead	T4b	N2b	M0	Stage IIIC	1	140				FEMALE	Extremities
TCGA-EB-A6QZ	352	Dead	T3a	N0	M0	Stage IIA	1	129	Dacarbazine;Vincristine	PR;PR	Chemotherapy;Chemotherapy	FEMALE	Trunk
TCGA-EE-A20C	4601	Dead	Tis	N0	M0	Stage 0	1	-1				MALE	Extremities
TCGA-FS-A4F8	5318	Dead	T1	N0	M0	Stage I	1	-1				MALE	Extremities
TCGA-D3-A1QA	2765	Alive	T2a	N0	M0	Stage IB	1	2553	recMAGE- A3	PD	Vaccine	MALE	Extremities
TCGA-D3-A8GV	5101	Dead	TX	N0	M0		1	-1				MALE	Extremities
TCGA-FS-A1ZC	10870	Dead	TX	N0	M0		1	10334				MALE	Trunk
TCGA-EB-A42Y	721	Dead	T4b	N0	M0	Stage IIC	1	721				FEMALE	Extremities
TCGA-GN-A26C	821	Dead	T4b	N2b	M0	Stage IIIC	1	-1				MALE	Trunk
TCGA-DA-A95X	2249	Alive	T2a	N0	M0	Stage IB	1	-1				MALE	Extremities
TCGA-DA-A3F2	1032	Dead	T4a	N2b	M0	Stage IIIB	1	430	Ipilimumab	PR	Immunotherapy	MALE	Trunk
TCGA-BF-A1PU	387	Alive	T4b	N0	M0	Stage IIC	1	-1				FEMALE	Extremities
TCGA-EE-A2A6	2620	Alive	T1a	N0	M0	Stage IA	1	1505				MALE	Trunk
TCGA-EE-A2GT	1365	Alive	T3a	N0	M0	Stage IIA	1	281				MALE	Trunk
TCGA-FS-A1ZE	1413	Dead	T4b	N0	M0	Stage IIC	1	761	DTIC;Paclitaxel;Angiocal;Carboplatin_Paclitaxel;Carboplatin Paclitaxel	PD;PD;PD;PD;PD	Chemotherapy;Chemotherapy;TargetedTherapy;Chemotherapy;Chemotherapy	MALE	Trunk
TCGA-D3-A2JA	3514	Alive	T2a	N1a	M0	Stage IIIA	1	40				MALE	Trunk
TCGA-ER-A19S	1505	Alive					0	1505				FEMALE	NA
TCGA-W3-AA1V	1280	Dead	T3	N0	M0	Stage II	1	-1	NA	PD	Immunotherapy	MALE	NA
TCGA-EB-A41B	291	Alive	T4b	N0	M0	Stage IIC	0	291				FEMALE	Extremities
TCGA-EE-A29H	1966	Alive	T1a	N0	M0	Stage IA	1	1231	NA;NA;Vemurafenib	NA;PD;NA	Vaccine;Vaccine;TargetedTherapy	FEMALE	Trunk
TCGA-ER-A19E	396	Dead	T2a	N0	M0	Stage IB	1	-1	Carboplatin;Paclitaxel	CP;CP	Chemotherapy;Chemotherapy	FEMALE	Extremities
TCGA-FR-A3YO			T2	N0	M0		1	-1	Ipilimumab	SD	Immunotherapy	FEMALE	Extremities
TCGA-BF-A5EP	335	Alive	T4b	N3	M0	Stage IIIC	0	335				FEMALE	Trunk
TCGA-BF-AAP4	335	Alive	T4b	N0	M0	Stage IIC	0	335				MALE	Trunk
TCGA-ER-A19G	9188	Alive		N0	M0		0	9188	GM-CSF	CP	Chemotherapy	FEMALE	Extremities
TCGA-EE-A2MI	6225	Dead	T4	N0	M0	Stage IIB	1	-1				MALE	Extremities
TCGA-FS-A4FB	813	Dead	T2	N1a	M0	Stage III	1	-1				FEMALE	Extremities
TCGA-EE-A2MK	5487	Alive	T4a	N0	M0	Stage III	1	-1				FEMALE	Extremities
TCGA-EE-A3JE	1562	Alive	T3b	N1a	M0	Stage IIIB	1	194				MALE	Trunk
TCGA-D3-A8GB	938	Dead	T3a	N1b	M0	Stage IIIB	1	-1	Interferon	CP	Immunotherapy	MALE	Extremities
TCGA-D3-A51T	818	Alive	T4b	N1b	M0	Stage IIIC	1	210				FEMALE	Trunk
TCGA-D3-A2JG	3453	Dead	T3a	N1a	M0	Stage IIIA	1	-1				FEMALE	Extremities
TCGA-BF-A3DL	769	Alive	T3b	N2	M0	Stage IIIB	0	769				FEMALE	Extremities
TCGA-EE-A29M	1729	Alive	T2a	N0	M0	Stage IB	1	-1				FEMALE	Extremities
TCGA-EE-A29C	2402	Dead	T2a	N0	M0	Stage IB	1	2212	Paclitaxel;GSK Braf Inhibitor;Yervoy;Dabrafenib;Trametinib	NA;PD;SD;PD;PD	Chemotherapy;TargetedTherapy;Immunotherapy;TargetedTherapy;TargetedTherapy	MALE	Trunk
TCGA-WE-A8ZM	3082	Alive	TX	N1b	M0	Stage IIIB	1	646	Diphencyprone	NA	Immunotherapy	MALE	Extremities
TCGA-EE-A2GU	2884	Alive	T1a	N0	M0	Stage IA	1	-1	NA	NA	Vaccine	FEMALE	Extremities
TCGA-EB-A82C	17	Alive	T4b	N0	M0	Stage IIC	0	17				FEMALE	Extremities
TCGA-EE-A2GS	2470	Dead	T2a	N0	M0	Stage IB	1	1831	Dabrafenib;Ipilimumab;NA;NA;Vemurafenib	PD;PD;PD;PD;PD	TargetedTherapy;Immunotherapy;TargetedTherapy;TargetedTherapy;TargetedTherapy	FEMALE	Extremities
TCGA-EE-A2A5	1195	Dead	T2a	N0	M0	Stage IB	1	-1	Fotemustine	NA	Chemotherapy	MALE	Extremities
TCGA-D3-A2JL	5219	Alive	TX	N0	M0		1	-1	GP100;MAGE-3	NA;NA	Vaccine;Vaccine	FEMALE	Extremities
TCGA-FS-A1ZQ	4062	Dead	TX	N0	M0		1	3940				MALE	Extremities
TCGA-EE-A3AF	420	Dead	T0	N3	M0	Stage IIIC	1	-1	Fotemustine	PD	Chemotherapy	FEMALE	NA
TCGA-BF-AAP2	405	Alive	T3b	N0	M0	Stage IIB	0	405				MALE	Extremities
TCGA-EB-A4IS	774	Alive	T3b	NX	M0	Stage IIB	0	774				MALE	Trunk
TCGA-GN-A4U8	1487	Alive					1	-1	Sylatron	NA	Immunotherapy	MALE	Trunk
TCGA-FS-A4F9	1035	Alive	T4b	N3	M0	Stage IIIC	1	376	Temodal	CP	Chemotherapy	MALE	Trunk
TCGA-EE-A183	818	Dead	Tis	N0	M0	Stage 0	1	-1				MALE	Trunk
TCGA-FS-A4FC	1655	Dead	T3a	N0	M0	Stage IIA	1	-1				FEMALE	Extremities
TCGA-EB-A1NK	1039	Alive	T4b	N0	M0	Stage IIC	0	1039				MALE	Extremities
TCGA-DA-A1HV	2329	Alive	T0	N2b	M0	Stage IIIB	1	866				FEMALE	NA
TCGA-XV-AAZV	412	Alive	T4	N0	M0	Stage II	0	412				FEMALE	Trunk
TCGA-EE-A3JI	4648	Dead	T2	N0	M0	Stage I	1	-1	Dacarbazine;Ipilimumab	PD;PD	Chemotherapy;Immunotherapy	MALE	Extremities;Trunk
TCGA-D3-A5GN	4129	Alive	T1	N0	M0	Stage I	1	-1				FEMALE	Trunk
TCGA-EE-A2MH	516	Dead	T4a	N0	M0	Stage III	1	-1	NA	PD	Vaccine	MALE	Trunk
TCGA-WE-A8ZQ	1923	Alive	T3a	N0	M0	Stage IIA	1	1757	vemurafenib;Dabrafenib	NA;NA	Chemotherapy;TargetedTherapy	MALE	Extremities
TCGA-EB-A4P0	326	Dead	T4b	N0	M0	Stage IIC	0	326				MALE	Trunk
TCGA-D9-A4Z5	218	Alive	T4a	N0	M0	Stage IIB	0	218				MALE	Head and Neck
TCGA-FS-A1ZK	728	Dead	T4	N0	M0	Stage II	1	367				MALE	Head and Neck
TCGA-DA-A1IC	2071	Dead	T3a	N2c	M0	Stage IIIB	1	1930				MALE	Extremities
TCGA-FS-A1Z4	854	Dead	T1	N0	M0	Stage I	0	854				MALE	Extremities
TCGA-D3-A8GC	2421	Dead	TX	N3	M0	Stage IIIC	1	-1				MALE	NA
TCGA-ER-A19W	4507	Dead					1	4126				FEMALE	Trunk
TCGA-D3-A3C1			TX	N0	M0		1	-1	Interferon	NA	Immunotherapy	MALE	Trunk
TCGA-FS-A1ZH	996	Dead	T3b	N2c	M1c	Stage IV	1	577				FEMALE	Extremities
TCGA-FS-A1ZA	843	Dead	T4b	N2c	M0	Stage IIIB	1	663				FEMALE	Trunk
TCGA-GF-A769	1070	Dead	T4b	NX	M0	Stage IIC	0	1070				MALE	Extremities
TCGA-FS-A1Z0	6164	Dead	T1a	N0	M0	Stage IA	1	5503				FEMALE	Extremities
TCGA-FW-A3R5	1124	Alive	TX	N2	M0	Stage III	0	1124	Interferon	CP	Immunotherapy	MALE	Head and Neck
TCGA-EE-A3J3	5237	Dead	T2	N0	M0	Stage IB	1	-1				MALE	Trunk
TCGA-FS-A1Z7	237	Dead	T4b	N1b	M0	Stage IIIC	1	136				MALE	Head and Neck
TCGA-EB-A5KH	619	Dead	T0	N1	M0	Stage III	0	619	Cisplatin;Vinblastine;Dacarbazine;Leukine	CP;CP;CP;CP	Chemotherapy;Chemotherapy;Chemotherapy;Immunotherapy	MALE	Extremities
TCGA-D3-A1Q4	3408	Alive	T2b	N1b	M0	Stage IIIC	1	-1				FEMALE	Extremities
TCGA-EB-A299	378	Alive	T2b	N0	M0	Stage IIA	0	378				MALE	Extremities
TCGA-HR-A5NC	0	Alive	T4	NX	M0		1	0				FEMALE	Trunk
TCGA-EE-A3J8	1044	Dead	T4a	N1a	M0	Stage IIIA	1	1035				MALE	Trunk
TCGA-EE-A3J7	1949	Alive	T2	N0	M0	Stage I	1	1270				MALE	Trunk
TCGA-D9-A149	1663	Alive	TX	N1b	M0		1	1290				FEMALE	Trunk
TCGA-D9-A4Z6	561	Dead	T3b	N1b	M0	Stage IIIC	1	213				MALE	Trunk
TCGA-Z2-AA3V	486	Alive	T1a	N0	M0	Stage IA	1	-1	NA	NA	TargetedTherapy	FEMALE	Trunk
TCGA-EB-A85J	360	Alive	T4a	N0	M0	Stage IIB	1	138	Dacarbazine;Vincristine	CP;CP	Chemotherapy;Chemotherapy	FEMALE	Trunk
TCGA-QB-A6FS	220	Alive	T0	N3	M0	Stage IIIC	1	-1				MALE	NA
TCGA-EE-A3AH	4222	Dead	T3b	N0	M0	Stage II	1	-1	PI88	PD	Chemotherapy	MALE	Extremities
TCGA-EE-A2ML	6590	Dead	T3a	N0	M0	Stage II	1	6210	Dacarbazine;Fotemustine;MORAb-004	PD;PD;PD	Chemotherapy;Chemotherapy;Immunotherapy	MALE	Trunk
TCGA-FW-A5DX	640	Alive	T4a	N3		Stage IIIC	0	640				MALE	Trunk
TCGA-FS-A1ZT	1617	Alive	T2	N1b	M0	Stage III	0	1617	interferon alpha	SD	Immunotherapy	MALE	Extremities
TCGA-EB-A3XD	1160	Alive	T4b	NX	M0	Stage IIC	0	1160				FEMALE	Extremities
TCGA-FR-A8YD	1103	Dead	T4b	N0	M0	Stage IIC	1	-1	Ipilimumab	SD	Immunotherapy	FEMALE	NA
TCGA-XV-AAZY	405	Alive	T4	N3	M0	Stage IIIC	0	405				FEMALE	Trunk
TCGA-EE-A3AG	1265	Dead	T0	N2c	M0	Stage III	1	755	NA;NA	PD;PD	TargetedTherapy;TargetedTherapy	MALE	NA
TCGA-EE-A3AC	1948	Alive	T0	N2b	M0	Stage III	1	-1				MALE	NA
TCGA-D9-A4Z2	190	Dead	T4b	N3	M0	Stage IIIC	1	80				MALE	Trunk;Extremities
TCGA-EB-A5FP	454	Dead	T4b	NX	M1b	Stage IV	1	24	Dacarbazine;Carboplatin	PD;PD	Chemotherapy;Chemotherapy	FEMALE	Trunk
TCGA-WE-A8ZO	2145	Alive	T3a	N1b	M0	Stage IIIB	1	1371				FEMALE	Extremities
TCGA-EE-A3AA	3781	Alive	T0	N2a	M0	Stage III	0	3781	NA	NA	Vaccine	MALE	NA
TCGA-BF-AAP0	454	Alive	T4	NX	M1	Stage IV	0	454				FEMALE	Trunk
TCGA-XV-AB01	403	Alive	T3	NX	M0	Stage II	1	-1	interferon	NA	Immunotherapy	FEMALE	Head and Neck
TCGA-GN-A4U9	673	Dead	T2b	N3	M0	Stage IIIC	1	384	Ipilimumab;melphalan;Imiquimod;Axitinib	PR;CP;NA;PD	Immunotherapy;Chemotherapy;Immunotherapy;Chemotherapy	MALE	Extremities
TCGA-GF-A2C7	21	Alive	T4b	N0	M0	Stage IIC	0	21				MALE	Head and Neck
TCGA-D9-A6EA	766	Alive	T4a	N3	M0	Stage IIIC	0	766				MALE	Trunk
TCGA-FR-A8YE	3176	Alive	T1a	N0	M0	Stage IA	1	-1				MALE	Trunk
TCGA-EB-A4OZ	620	Alive	T4a	N3	M0	Stage IIIC	0	620				FEMALE	Trunk
TCGA-EB-A5VV	214	Alive	T3b	N1	M0	Stage IIIB	1	-1				FEMALE	Head and Neck
TCGA-D3-A51N	688	Alive	T0	N3	M1c	Stage IV	1	18				FEMALE	NA
TCGA-W3-AA1O	122	Dead	TX	N2	M0	Stage III	0	122	Carmustine;tamoxifen;Cisplatin;Dacarbazine	PD;PD;PD;PD	Chemotherapy;Hormone Therapy;Chemotherapy;Chemotherapy	MALE	NA
TCGA-ER-A19M	1857	Dead	T2a	N0	M0	Stage IB	1	-1	Interferon	PD	Immunotherapy	MALE	Extremities
TCGA-DA-A95W	1136	Alive	TX	N1b	M0	Stage IIIB	0	1136				MALE	NA
TCGA-ER-A42K	394	Dead	T4b	N3	M0	Stage IIIC	1	206				FEMALE	Extremities
TCGA-FS-A1ZM	3080	Alive	T2	N2c	M0	Stage III	1	-1				MALE	Extremities
TCGA-WE-A8ZR	274	Dead	T4b	N1b	M0	Stage IIIC	1	126	vemurafenib	PD	Chemotherapy	MALE	Trunk
TCGA-EE-A2MG	3139	Dead	T2	N0	M0	Stage I	1	-1	Cancer Vax;Dacarbazine	PD;NA	Vaccine;Chemotherapy	MALE	Trunk
TCGA-W3-AA1R	3379	Dead	T3	N0	M0	Stage II	1	-1	NA;NA;NA;IL2	PD;PD;PD;PD	Immunotherapy;Vaccine;Immunotherapy;Immunotherapy	MALE	Head and Neck
TCGA-BF-AAOX	444	Alive	T4b	N0	M0	Stage IIC	0	444				MALE	Extremities
TCGA-GN-A8LN	772	Alive	T4b	NX	M0	Stage IIC	1	437	ipilimumab;carboplatin;paclitaxel;Pembrolizumab	PR;NA;NA;NA	Immunotherapy;CP;Chemotherapy;Immunotherapy	MALE	Trunk
TCGA-DA-A1I5	4107	Alive	T1a	N0	M1c	Stage IV	1	-1				FEMALE	Head and Neck
TCGA-WE-AAA0	1229	Alive	T1a	N0	M0	Stage IA	1	650	ipilimumab;pembrolizumab	PD;NA	Immunotherapy;Immunotherapy	MALE	Head and Neck
TCGA-FR-A2OS	368	Dead	T4b	N0	M0	Stage IIC	1	-1	Temodar	CP	Chemotherapy	FEMALE	Extremities
TCGA-ER-A2NE	613	Dead	Tis	N0	M0	Stage 0	0	613				MALE	Extremities
TCGA-EB-A82B	390	Alive	T4b	N2	M0	Stage III	0	390				FEMALE	Extremities
TCGA-EE-A2M7	877	Dead	T3a	N0	M0	Stage II	1	799				MALE	Trunk
TCGA-EE-A29A	1927	Dead	T3a	N1a	M0	Stage IIIA	1	-1				MALE	Trunk
TCGA-FS-A1Z3	636	Dead	TX	N0	M1	Stage IV	1	276				FEMALE	NA
TCGA-GF-A4EO	591	Alive	T0	N3	M0	Stage IIIC	0	591				FEMALE	NA
TCGA-D3-A2JP	1812	Alive	T0	N3	M0	Stage IIIC	1	227	Interferon Alpha	PR	Immunotherapy	MALE	NA
TCGA-QB-AA9O	549	Dead	TX	N3	M0	Stage IIIC	1	-1	ipilimumab	PD	Immunotherapy	MALE	NA
TCGA-GN-A262	4255	Alive					1	-1				FEMALE	Trunk
TCGA-W3-AA1W	6666	Alive	T3	N0	M0	Stage II	1	-1	Interferon;NA	PD;PD	Immunotherapy;Immunotherapy	MALE	Trunk
TCGA-EE-A2MJ	2927	Dead	T4b	N0	M0	Stage III	1	-1				MALE	Trunk
TCGA-EB-A41A	0	Alive	T4b	N0	M0	Stage IIC	0	0				MALE	Head and Neck
TCGA-XV-A9W5	392	Alive	T2	N0	M0		1	-1	interferon	NA	Immunotherapy	MALE	Extremities
TCGA-RP-A695			TX	NX	M1c	Stage IV	1	-1				MALE	Head and Neck
TCGA-ER-A199	279	Dead	T4b	N3	M0	Stage IIIC	1	119				FEMALE	Extremities
TCGA-D3-A2JH	1280	Alive	T1b	N0	M0	Stage IB	1	569	Interferon	NA	Immunotherapy	MALE	Extremities
TCGA-FS-A4F0	2367	Alive	T4a	N0	M0	Stage IIB	1	872	Treosulfan;Interferon alpha;DTIC;Gemcitabine	PD;SD;PD;PD	Chemotherapy;Immunotherapy;Chemotherapy;Chemotherapy	FEMALE	Trunk
TCGA-WE-AA9Y	370	Alive	T2a	N3	M0	Stage IIIC	1	-1				MALE	Extremities
TCGA-EB-A97M	414	Alive	T4b	N0	M0	Stage IIC	0	414				MALE	Trunk
TCGA-WE-A8JZ	731	Alive	T4b	N1a	M0	Stage IIIB	1	-1				MALE	Extremities
TCGA-D3-A3CE	1832	Dead	T0	N1b	M0	Stage III	1	-1				FEMALE	NA
TCGA-DA-A1HY	4407	Alive	T2b	N1	M0	Stage III	1	-1				MALE	Extremities
TCGA-EB-A4OY	977	Alive	T4b	N1a	M0	Stage IIIB	0	977	Fareston;Lomustine	CP;CP	Hormone Therapy;Chemotherapy	FEMALE	Extremities
TCGA-YG-AA3P	439	Alive	T4a	N0	M0	Stage IIB	1	-1	Yervoy	NA	Immunotherapy	FEMALE	Extremities
TCGA-ER-A19H	4634	Dead		N0	M0		0	4634	Patrin;DTIC	CP;PD	Chemotherapy;Chemotherapy	MALE	Trunk
TCGA-W3-A828	3683	Dead	T3	N0	M0	Stage II	1	-1	NA	NA	Immunotherapy	MALE	Head and Neck
TCGA-FS-A4F5	874	Dead	T2a	N0	M0	Stage IB	1	-1				FEMALE	Extremities
TCGA-FR-A7U8	847	Alive	TX	N3	M0	Stage IIIC	1	567	Interferon	PR	Immunotherapy	MALE	NA
TCGA-EE-A2GH	6699	Alive	T2	N0	M0	Stage I	1	-1	NA;NA	NA;NA	Vaccine;Vaccine	MALE	Trunk
TCGA-D3-A2J8	1992	Dead	T2a	N0	M0	Stage IB	1	-1				MALE	Extremities
TCGA-3N-A9WC	2022	Alive	T2b	NX	M0	Stage IIA	1	1705				MALE	Trunk
TCGA-EB-A550	264	Dead	T4b	NX	M0	Stage IIC	0	264	Tamoxifen	CP	Hormone Therapy	FEMALE	Unknown
TCGA-BF-A5ES	490	Alive	T4b	N0	M0	Stage IIC	0	490				FEMALE	Trunk
TCGA-ER-A194	1354	Dead		N0	M0		0	1354				MALE	NA
TCGA-WE-A8ZN	1794	Alive	T4a	NX	M0	Stage IIB	1	1449	nivolumab	PD	Chemotherapy	MALE	Extremities
TCGA-D3-A1Q3	507	Dead	T4b	N0	M0	Stage IIC	0	507	Cisplatin	CP	Chemotherapy	MALE	Extremities
TCGA-WE-A8ZT	359	Alive	T3b	N1b	M1b	Stage IV	1	69				FEMALE	Trunk
TCGA-DA-A1IA	2005	Dead	T2a	N1b	M0	Stage IIIB	1	-1				FEMALE	Extremities
TCGA-GN-A268	1910	Dead	T4a	N0	M0	Stage IIB	1	-1				FEMALE	Extremities
TCGA-YG-AA3N	306	Alive	T4b	N0	M0	Stage IIC	0	306				MALE	Trunk
TCGA-EE-A182	447	Dead	T4b	N1b	M0	Stage IIIC	1	-1	PV-10	PD	Ancillary	FEMALE	Trunk
TCGA-YD-A9TA	1496	Alive					1	-1				MALE	Head and Neck
TCGA-BF-AAP7	318	Alive	T4b	N0	M0	Stage IIC	0	318				FEMALE	Extremities
TCGA-FS-A1ZS	4526	Alive	T2	N0	M0	Stage I	1	2861	interferon alpha	SD	Immunotherapy	MALE	Trunk
TCGA-D3-A1Q7	4053	Alive	T1b	N0	M0	Stage IB	1	-1				FEMALE	Trunk
TCGA-BF-A1Q0	831	Alive	T4b	N0	M0	Stage IIC	0	831				MALE	Trunk
TCGA-HR-A2OG	7	Alive					1	-1				FEMALE	Extremities
TCGA-BF-AAP1	409	Alive	T4b	N0	M0	Stage IIC	0	409				MALE	Extremities
TCGA-FW-A3I3	531	Alive		N0	M1	Stage IV	0	531				FEMALE	NA
TCGA-D3-A3CF	746	Dead	T4b	N3	M0	Stage IIIC	1	-1				FEMALE	NA
TCGA-D3-A8GR	3943	Dead	Tis	N0	M0	Stage 0	1	-1				FEMALE	Extremities
TCGA-D9-A1JX	216	Dead	TX	NX	M0		1	195				FEMALE	Extremities
TCGA-EE-A2GM	2296	Alive	T4b	N0	M0	Stage IIC	1	-1				FEMALE	Trunk
TCGA-D3-A3MU	1209	Alive	T3a	N2a	M0	Stage IIIA	1	750				MALE	Trunk
TCGA-EE-A2GD	10346	Dead	T4	N0	M0	Stage IIB	1	10143				FEMALE	Extremities
TCGA-D9-A6EG	698	Dead	T4a	N1	M0	Stage IIIA	1	398				MALE	Trunk
TCGA-FS-A1ZW	1505	Alive	T2b	N1a	M0	Stage IIIB	0	1505	interferon alpha	SD	Immunotherapy	MALE	Extremities
TCGA-D3-A5GS	553	Alive	T1b	N1b	M1c	Stage IV	1	44				MALE	Trunk
TCGA-ER-A2NC	1333	Dead	T2a	N0	M0	Stage IB	1	1157	NA	CP	Chemotherapy	MALE	Extremities
TCGA-EB-A24D	645	Alive	T4a	N2b	M0	Stage IIIB	1	500	Cisplatin;Dacarbazine;Temodal;Alferon	NA;NA;NA;NA	Chemotherapy;Chemotherapy;Chemotherapy;Immunotherapy	MALE	Extremities
TCGA-EE-A2MM	5107	Dead	T2	N0	M0	Stage I	1	-1	VMCL;autologous vaccine	PD;PD	Vaccine;Vaccine	FEMALE	Trunk
TCGA-ER-A2NG	1490	Dead	T3b	N3	M0	Stage IIIC	1	1153	VEMURAFENIB;Ipilimumab;IL-2	CP;CP;CP	Chemotherapy;Immunotherapy;Immunotherapy	FEMALE	Trunk
TCGA-DA-A960	804	Alive	T3b	N0	M0	Stage IIB	1	-1				MALE	Trunk
TCGA-GN-A4U7	317	Dead	T2b	N3	M0	Stage IIIC	1	-1	vemurafenib	NA	Chemotherapy	FEMALE	Extremities
TCGA-YD-A89C	210	Alive	T1a	NX	M0	Stage IA	1	-1				FEMALE	Extremities
TCGA-GN-A4U5	1156	Alive	T2a	NX	M0	Stage IB	0	1156	Interferon	CP	Immunotherapy	FEMALE	Trunk
TCGA-EE-A2GJ	2270	Alive	T1a	N0	M0	Stage IA	1	2270				MALE	Extremities
TCGA-FS-A1ZU	808	Dead	T4b	N0	M0	Stage IIC	1	679				FEMALE	Extremities
TCGA-EE-A3AB	3733	Alive	T0	N2a	M0	Stage III	0	3733				MALE	NA
TCGA-FR-A7U9	571	Alive	T3b	N3	M0	Stage IIIC	1	95	Talimogene Laherparepvec (T-VEC);Ipilimumab	PR;NA	Vaccine;Immunotherapy	FEMALE	Extremities
TCGA-D3-A1Q9	961	Dead	T4b	N2a	M0	Stage IIIB	1	-1	Lupron;GP-100	PD;PD	Hormone Therapy;Vaccine	MALE	Extremities
TCGA-XV-A9VZ	0	Alive	T4	N0	M0	Stage II	0	0				FEMALE	NA
TCGA-EE-A29G	2192	Dead	T4a	N2a	M0	Stage IIIA	1	-1				MALE	Head and Neck
TCGA-ER-A19J	196	Dead	TX	N3	M1	Stage IV	1	-1	Dacarbazine	CP	Chemotherapy	MALE	NA
TCGA-D3-A2JB	5110	Dead	Tis	N0	M0	Stage 0	1	-1				FEMALE	Extremities
TCGA-W3-A824	6940	Alive	T2	N0	M0	Stage I	1	2406	NA	PD	Immunotherapy	MALE	Trunk
TCGA-ER-A198	1544	Dead		NX	M0		1	0	Dacarbazine	CP	Chemotherapy	MALE	NA
TCGA-GN-A4U3	3708	Alive	T3a	N1a	M0	Stage III	1	2274	Interleukin-2	CP	Immunotherapy	MALE	Extremities
TCGA-EE-A29P	1716	Alive	T4b	N0	M0	Stage IIC	1	1668				FEMALE	Trunk
TCGA-D3-A8GP	4638	Alive	T2	N2c	M0	Stage III	1	535				MALE	Extremities
TCGA-ER-A1A1	3196	Alive	TX	N3	M0	Stage IIIC	1	1971	Interferon	CP	Immunotherapy	MALE	NA
TCGA-BF-AAP6	325	Alive	T4b	N2	M0	Stage III	0	325				MALE	Extremities
TCGA-EE-A184	2073	Dead	T2a	N0	M0	Stage IB	1	-1				MALE	Extremities
TCGA-ER-A3EV	1429	Dead	T4	N0	M0	Stage III	1	728	NA	PD	Vaccine	MALE	Extremities
TCGA-GN-A266	308	Dead					1	109				MALE	NA
TCGA-D3-A1Q5	3424	Dead	TX	N0	M0		1	2452				MALE	Trunk
TCGA-EB-A3XC	650	Alive	T4b	N0	M0	Stage IIC	1	74	Dacarbazine	CP	Chemotherapy	MALE	Trunk
TCGA-EB-A551	590	Alive	T4b	N2b	M0	Stage IIIC	0	590				FEMALE	Extremities
TCGA-EE-A2MS	4942	Alive	T3a	N0	M0	Stage II	1	4522				MALE	Extremities
TCGA-IH-A3EA	524	Alive	T4b	N0	M0	Stage IIC	1	314				MALE	Head and Neck
TCGA-D3-A1Q6	2184	Dead	T4	N1b	M0	Stage III	1	48	Interferon	NA	Immunotherapy	MALE	Extremities
TCGA-EE-A2GK	1665	Alive	T1	N0	M0	Stage I	1	1498				FEMALE	Trunk
TCGA-BF-A9VF	440	Alive	T4b	N0	M0	Stage IIC	0	440				MALE	Extremities
TCGA-D3-A3CB	5065	Alive	T2	N0	M0		1	-1	MEL-44	CP	Vaccine	MALE	Trunk
TCGA-FS-A1YY	6953	Dead	T3a	N0	M0	Stage IIA	1	6777				FEMALE	Trunk
TCGA-GN-A8LL	650	Dead	T4b	NX	M0	Stage IIC	1	-1				FEMALE	Extremities
TCGA-EB-A553	226	Alive	T4b	N0	M0	Stage IIC	0	226	Dacarbazine;Carboplatin	CP;CP	Chemotherapy;Chemotherapy	MALE	Trunk
TCGA-EE-A20F	2785	Alive	T1	N0	M0	Stage I	1	-1				MALE	Extremities
TCGA-FR-A3R1	685	Alive	T4b	N0	M0	Stage IIC	1	678				MALE	Extremities
TCGA-Z2-AA3S	2950	Alive	T1a	N0	M0	Stage IA	1	2846				MALE	Trunk
TCGA-FS-A1ZB	1486	Dead	T3a	N0	M0	Stage II	1	1461				MALE	Trunk
TCGA-EE-A17Z	263	Dead	T4a	N0	M0	Stage IIB	1	-1				MALE	Trunk
