# Supplementary material for: Epigenomic and genomic analysis of transcriptome modulation in skin cutaneous melanoma
Source: Aging (Albany NY). 2020 Jul 7;12(13):12703–25. doi: 10.18632/aging.103115 (PMC7377867; doi:10.18632/aging.103115)
Supplement: Supplementary Table 2 [file aging-12-103115-s011..xlsx]

## Sheet: S2_Table
Supplementary Table 2. Included CNVcor gene set for multi-omics analysis.
CnvRegion	CnvGene	ExpGene	Cor	Cor.pvalue	Z_value
ALDH1L2	ALDH1L2	ALDH1L2	0.19489655640919	2.26896484405482e-05	0.197422063213213
TCF20	TCF20	TCF20	0.783158273487058	8.61409869554471e-98	1.05348683274587
SERBP1	SERBP1	SERBP1	0.502059086369629	3.99585395046259e-31	0.552055373677608
LANCL1	LANCL1	LANCL1	0.304728630916589	1.8044903352196e-11	0.31472406200351
UBE2G2	UBE2G2	UBE2G2	0.507941350090556	6.21011605699558e-32	0.559951369388977
ACSL3	ACSL3	ACSL3	0.309856977909812	7.91999401601169e-12	0.320387189281585
LGALSL	LGALSL	LGALSL	0.282670287266095	5.20571986112764e-10	0.290581880264682
MTPAP	MTPAP	MTPAP	0.579266482958138	4.12144096480786e-43	0.661358054904946
PTDSS2	PTDSS2	PTDSS2	0.431149730379601	1.61545287136353e-22	0.461308077255799
UBXN4	UBXN4	UBXN4	0.313527297806915	4.34987549839243e-12	0.324452465363071
BCAS3	BCAS3	BCAS3	0.20273362009794	1.03109950181716e-05	0.205581705298067
STX3	STX3	STX3	0.683717890253833	1.75514124850557e-65	0.83606254474228
CDH19	CDH19	CDH19	0.187058340685677	4.84234883031001e-05	0.189287097941479
CMIP	CMIP	CMIP	0.326300020018167	5.06360395583891e-13	0.338681763170353
MAP2	MAP2	MAP2	0.168780548305271	0.00025223895234026	0.170411188197435
SLAMF8	SLAMF8	SLAMF8	-0.243835456617602	9.80997594308115e-08	-0.248847996238401
SLC25A16	SLC25A16	SLC25A16	0.392732075949235	1.2328192612377e-18	0.415026267537541
ZNF57	ZNF57	ZNF57	0.459878070057048	9.16102343395076e-26	0.497156643647258
NDUFA6	NDUFA6	NDUFA6	0.733597983431779	7.29326269622382e-80	0.936473889328786
ZDHHC24	ZDHHC24	ZDHHC24	0.440063858384062	1.71329390247959e-23	0.472309996644277
AMBRA1	AMBRA1	AMBRA1	0.580732939360743	2.26821018115662e-43	0.663567905509575
PRADC1	PRADC1	PRADC1	0.271553065354223	2.54391342687756e-09	0.278539768700633
DDX24	DDX24	DDX24	0.60768604981391	2.21263147015039e-48	0.705244387722574
MAX	MAX	MAX	0.577972995881172	6.96203785811138e-43	0.659413542795738
SRGAP2	SRGAP2	SRGAP2	0.528064987277882	8.03443587552825e-35	0.587458104283861
KDM8	KDM8	KDM8	0.380451383486996	1.69509769636729e-17	0.400587319571936
RNF214	RNF214	RNF214	0.668229691037148	1.38049257113707e-61	0.807537694442967
ITGAM	ITGAM	ITGAM	-0.007013840368082	0.879973173963327	-0.00701395538432996
CNOT11	CNOT11	CNOT11	0.481459454271479	2.05338032315468e-28	0.524882387937912
CCS	CCS	CCS	0.633281314721666	1.32094585506979e-53	0.746875658898518
KDM4A	KDM4A	KDM4A	0.540624903775422	1.0042795091064e-36	0.60503815766868
P4HB	P4HB	P4HB	0.487448309951068	3.49328403197848e-29	0.532707911322269
PAPSS2	PAPSS2	PAPSS2	0.0783880887076101	0.090985262455136	0.0785492401608113
LBH	LBH	LBH	0.0682487753756835	0.141278306077652	0.0683550377270978
LDLR	LDLR	LDLR	0.0398648873680731	0.390564135589258	0.0398860254099167
LRRC20	LRRC20	LRRC20	0.267082487770869	4.71989101427706e-09	0.273719560957609
CYP20A1	CYP20A1	CYP20A1	0.426958126637461	4.5354166923574e-22	0.456170740974141
MTMR2	MTMR2	MTMR2	0.598130011061862	1.49918912597052e-46	0.690230427959915
ANKRD26	ANKRD26	ANKRD26	0.400753959952009	2.09497413835157e-19	0.424546824175826
NAB1	NAB1	NAB1	0.276596879686662	1.24945648027106e-09	0.28399324783664
RARG	RARG	RARG	0.231752809008057	4.22680391506197e-07	0.236040968645842
SLC2A11	SLC2A11	SLC2A11	0.45087461217078	1.02976483540012e-24	0.485797512909146
RGL1	RGL1	RGL1	0.0631473575516025	0.173557466395072	0.0632314941760696
RP11.572P18.1	RP11.572P18.1	RP11.572P18.1	-0.00816552679694405	0.860451841178651	-0.00816570828529106
AEN	AEN	AEN	0.485568448724802	6.11403156013779e-29	0.530245132315036
KCTD3	KCTD3	KCTD3	0.541538244033329	7.24971533704841e-37	0.606329589809709
TFCP2	TFCP2	TFCP2	0.852817034451276	5.21605259210816e-133	1.26639300240446
BIRC6	BIRC6	BIRC6	0.35332366174122	3.78908966936124e-15	0.369236449028898
GABPB1	GABPB1	GABPB1	0.774018576295457	3.82158832780288e-94	1.03027491716812
C15orf57	C15orf57	C15orf57	0.621085848341404	4.68048357500721e-51	0.726770906897435
ZMYM1	ZMYM1	ZMYM1	0.408363891596573	3.72732842656087e-20	0.433646092462043
SPPL2A	SPPL2A	SPPL2A	0.756495147932602	1.3086041169337e-87	0.987969420336673
CFDP1	CFDP1	CFDP1	0.495851411127879	2.74150470952982e-30	0.543789892838815
LRP5	LRP5	LRP5	0.526505292468917	1.36699250730782e-34	0.585297772001565
TUBD1	TUBD1	TUBD1	0.351323221650062	5.53447732243263e-15	0.366952496601037
TMED3	TMED3	TMED3	0.45308126007301	5.72904995982116e-25	0.488570676116733
BNIP3	BNIP3	BNIP3	0.276114342356297	1.33824479925506e-09	0.283470810702606
CYR61	CYR61	CYR61	0.0813760832428697	0.0792829764283405	0.0815564262896501
CBL	CBL	CBL	0.551928975425258	1.65653517760555e-38	0.621151089796279
S100A16	S100A16	S100A16	0.0770793584955827	0.0965290060715221	0.0772325536361052
DNM2	DNM2	DNM2	0.489696562129002	1.78040110806945e-29	0.535661101807211
ELP4	ELP4	ELP4	0.505693113019261	1.27049684108659e-31	0.556926029183908
RPP30	RPP30	RPP30	0.616473988507883	4.03057827670437e-50	0.719297530355306
ARL1	ARL1	ARL1	0.384776875519046	6.81899041339713e-18	0.405654649445968
UBAP2L	UBAP2L	UBAP2L	0.733566242533916	7.46620255300765e-80	0.936405164856903
HNRNPA3	HNRNPA3	HNRNPA3	0.395854538482593	6.21988514041804e-19	0.418723539915932
TRIB2	TRIB2	TRIB2	0.249286488053088	4.94635121504792e-08	0.25465187710901
GNAO1	GNAO1	GNAO1	0.0117960686061339	0.799521003897229	0.0117966157819259
OPTN	OPTN	OPTN	0.556008893091178	3.62192325244591e-39	0.627037443664618
NLRX1	NLRX1	NLRX1	0.393534509185169	1.03477368797892e-18	0.41597539157471
FAM102B	FAM102B	FAM102B	0.479200101834639	3.9696451697365e-28	0.521945426778998
RAB7B	RAB7B	RAB7B	0.179880864301849	9.43971889045706e-05	0.181859566382364
SCO1	SCO1	SCO1	0.6251197124417	6.91082929713563e-52	0.733365009709251
ZWINT	ZWINT	ZWINT	0.358403366703367	1.43033380737913e-15	0.375052742402041
TEX2	TEX2	TEX2	0.557971872730107	1.72983735279044e-39	0.629883328205428
RHBDD1	RHBDD1	RHBDD1	0.412337711796163	1.4864729938796e-20	0.43842455950159
MCAT	MCAT	MCAT	0.820358794671354	1.07794725291311e-114	1.15791367134199
ZBTB21	ZBTB21	ZBTB21	0.245963088497026	7.52366843584142e-08	0.251111376925855
PEX14	PEX14	PEX14	0.668439072383473	1.22726069541145e-61	0.80791609733494
LLPH	LLPH	LLPH	0.638896869429088	8.09288541619647e-55	0.756307528058082
SPRED2	SPRED2	SPRED2	0.430500590232315	1.8972945381969e-22	0.460510989306699
MTX2	MTX2	MTX2	0.417734497244674	4.18165887363299e-21	0.444944459032649
EIF4A3	EIF4A3	EIF4A3	0.546736624133853	1.11289291893923e-37	0.613714613219447
FAM96B	FAM96B	FAM96B	0.570225910594315	1.53262645912108e-41	0.647857541466856
TTC38	TTC38	TTC38	0.558331536848708	1.5099791370203e-39	0.630405741486677
RFWD2	RFWD2	RFWD2	0.587428990389025	1.42731552674334e-44	0.673731331915889
TPCN2	TPCN2	TPCN2	0.576336846404905	1.34676579614847e-42	0.656960146093177
RAVER1	RAVER1	RAVER1	0.360550424194659	9.42566185865102e-16	0.37751842600962
C12orf57	C12orf57	C12orf57	0.426338961540872	5.27609136185813e-22	0.455413788554936
LYST	LYST	LYST	0.436422335231381	4.31915817312743e-23	0.467802831011462
LETMD1	LETMD1	LETMD1	0.643797187900773	6.74473744652488e-56	0.76463196871894
PRKD2	PRKD2	PRKD2	0.298184248190256	5.04287018351601e-11	0.307525463590745
PIGB	PIGB	PIGB	0.385795064510177	5.4925103482429e-18	0.406850332049772
HERC1	HERC1	HERC1	0.351171261665494	5.69544959173585e-15	0.366779150050294
NUSAP1	NUSAP1	NUSAP1	0.358152090893296	1.50157003843099e-15	0.374764462082852
GSKIP	GSKIP	GSKIP	0.323455677653772	8.24714728766584e-13	0.33550178488054
RANGAP1	RANGAP1	RANGAP1	0.630155673251015	6.09734868952692e-53	0.741674307857866
MLYCD	MLYCD	MLYCD	0.590498698783579	3.93061527546863e-45	0.678431406104636
ARID1A	ARID1A	ARID1A	0.413281573834806	1.19273157553785e-20	0.439562307355138
ZNF664	ZNF664	ZNF664	0.517962007190545	2.39346486221391e-33	0.573550497620401
TMEM218	TMEM218	TMEM218	0.643181648454065	9.23851904031564e-56	0.763581418924148
ARID4B	ARID4B	ARID4B	0.363619757598453	5.16413367573246e-16	0.381050889674828
STK38L	STK38L	STK38L	0.292359393818636	1.23184549685094e-10	0.301144233913564
METTL7B	METTL7B	METTL7B	0.102677775179026	0.026662990730723	0.103040909550753
TCF12	TCF12	TCF12	0.277806595385908	1.05128682483041e-09	0.285303656611827
ERCC4	ERCC4	ERCC4	0.324448944404558	6.95951028470964e-13	0.336611512210801
MYOF	MYOF	MYOF	0.297435279717107	5.66296633234741e-11	0.306703603778763
ZNF592	ZNF592	ZNF592	0.578992758205827	4.6059206888604e-43	0.660946196491292
MRPS5	MRPS5	MRPS5	0.359351357153617	1.19023806025021e-15	0.376140877067383
RP4.639F20.1	RP4.639F20.1	RP4.639F20.1	0.340115963094719	4.40033761906961e-14	0.354223655449542
TMEM59	TMEM59	TMEM59	0.439009775110508	2.24165985626229e-23	0.471003509460677
COL4A1	COL4A1	COL4A1	-0.00465586207698615	0.920156282853456	-0.00465589571921127
NENF	NENF	NENF	0.398990228301501	3.10610277064356e-19	0.422447398199284
COL6A1	COL6A1	COL6A1	0.116291365591261	0.0119990555562516	0.116819889960925
GLMN	GLMN	GLMN	0.499485397540584	8.92176566029428e-31	0.548620242924935
CTD.2267D19.3	CTD.2267D19.3	CTD.2267D19.3	0.114768177402663	0.0131733961298559	0.115276096245209
MICAL3	MICAL3	MICAL3	0.513493571735802	1.03607981286824e-32	0.567462883171465
ESF1	ESF1	ESF1	0.530989191829416	2.94424359119908e-35	0.591521761381243
DDR2	DDR2	DDR2	0.228806607200168	5.96429595820543e-07	0.232929781750091
ZNF616	ZNF616	ZNF616	0.269866881629944	3.21606555272420e-09	0.276720242447554
NDRG2	NDRG2	NDRG2	0.170939664970915	0.000209321467456069	0.172634452463445
POLR3F	POLR3F	POLR3F	0.666332069408993	3.99239728347175e-61	0.804116922806948
RP11.890B15.3	RP11.890B15.3	RP11.890B15.3	0.461508725296251	5.86500291038784e-26	0.499226630564605
SFR1	SFR1	SFR1	0.452651982920972	6.4234501565996e-25	0.488030644937932
CDK5RAP1	CDK5RAP1	CDK5RAP1	0.638001359851062	1.26822402824841e-54	0.754795819639253
SPINT2	SPINT2	SPINT2	0.0245677457613709	0.596805286611136	0.0245726903707634
GPRC5A	GPRC5A	GPRC5A	0.163633406158326	0.000389929413035956	0.165117804587932
HELLS	HELLS	HELLS	0.35628577353322	2.1514905969507e-15	0.372625156921395
TNRC6A	TNRC6A	TNRC6A	0.382626236153162	1.07420110399595e-17	0.40313271134926
WASF2	WASF2	WASF2	0.720369610856557	9.59078185680072e-76	0.908412872188829
CSNK1G2	CSNK1G2	CSNK1G2	0.522183552184832	5.87619692510337e-34	0.579337236062686
TERF2IP	TERF2IP	TERF2IP	0.603394948128579	1.49535112135792e-47	0.698468774461916
WWOX	WWOX	WWOX	0.341372259660567	3.50223806535619e-14	0.355644977046856
PRNP	PRNP	PRNP	0.202582614420532	1.04719500550738e-05	0.205424232148862
ADAM10	ADAM10	ADAM10	0.364217571986176	4.58958135752682e-16	0.381739962721084
TMBIM6	TMBIM6	TMBIM6	0.579466779723079	3.79927553226833e-43	0.661659554866682
TUFT1	TUFT1	TUFT1	0.257747230807962	1.65464199407012e-08	0.263693821610646
CDK12	CDK12	CDK12	0.429083888929316	2.69174209678818e-22	0.458773298898142
NUBPL	NUBPL	NUBPL	0.335213023125482	1.06199431093098e-13	0.348689736089288
MFSD9	MFSD9	MFSD9	0.429706031522077	2.3089554446007e-22	0.459536083851823
MOB2	MOB2	MOB2	0.540858889301726	9.23925279479154e-37	0.605368833368346
GPR176	GPR176	GPR176	0.123873211441672	0.00742421555143257	0.124512703311135
NGDN	NGDN	NGDN	0.56520924960361	1.08667949785307e-40	0.640454959035015
SPG21	SPG21	SPG21	0.349891551431669	7.2463470691242e-15	0.365320171504385
PDE8A	PDE8A	PDE8A	0.337906606295261	6.55767599400448e-14	0.351727406593284
RPRD1B	RPRD1B	RPRD1B	0.622589383267934	2.3017681024993e-51	0.729222386559053
SORL1	SORL1	SORL1	0.31809344751813	2.04014416158831e-12	0.329524492457555
TSHZ1	TSHZ1	TSHZ1	0.349056805589807	8.47396635935679e-15	0.364369292648619
PGAP2	PGAP2	PGAP2	0.39399521153647	9.35591621157512e-19	0.416520634234363
KANSL3	KANSL3	KANSL3	0.34282124972613	2.68806946354505e-14	0.357286019002988
CMPK2	CMPK2	CMPK2	0.00780207161699514	0.866603893392714	0.00780222993284803
C1QBP	C1QBP	C1QBP	0.592384179065591	1.76798303060022e-45	0.681331270175572
CCDC34	CCDC34	CCDC34	0.387214942947944	4.05703558172214e-18	0.408519572283331
RRBP1	RRBP1	RRBP1	0.512536454929824	1.41409663623888e-32	0.566163891874461
WDSUB1	WDSUB1	WDSUB1	0.352483058668007	4.44446228475722e-15	0.368276263626425
SMARCA4	SMARCA4	SMARCA4	0.423549881932317	1.03887852480166e-21	0.452010068678719
NPC1	NPC1	NPC1	0.213992854522798	3.14421733899651e-06	0.217352101190384
STK39	STK39	STK39	0.27768301984533	1.07003853931502e-09	0.285169751325573
SPSB1	SPSB1	SPSB1	0.309069206113233	8.99734128530691e-12	0.319515984388781
ITGB4	ITGB4	ITGB4	0.111330414669276	0.0162027035248028	0.111793825991744
TLK2	TLK2	TLK2	0.57127383216372	1.01366299082767e-41	0.649411757860831
MED18	MED18	MED18	0.647201314417303	1.16844504299282e-56	0.770467677615437
LTA4H	LTA4H	LTA4H	0.411689632658504	1.72835441492947e-20	0.437643971367918
SLC13A3	SLC13A3	SLC13A3	0.0871943979539364	0.059999596248166	0.0874163871778041
CBX2	CBX2	CBX2	0.20175352207343	1.13991524495358e-05	0.204559809107658
CBY1	CBY1	CBY1	0.715517140503796	2.71402402892031e-74	0.898398424931774
GNA13	GNA13	GNA13	0.467174018638253	1.22247698697184e-26	0.506449255682773
ARID4A	ARID4A	ARID4A	0.189940654915159	3.67732538836434e-05	0.192275602261652
C10orf90	C10orf90	C10orf90	0.317793260679929	2.14511531847608e-12	0.32919054782898
PKDCC	PKDCC	PKDCC	0.156676379725481	0.0006885994283108	0.15797760308432
C2CD3	C2CD3	C2CD3	0.738902678286861	1.38392672743855e-81	0.948058165329359
THEM4	THEM4	THEM4	0.49020459926128	1.52781924008417e-29	0.536329617124551
VPS26A	VPS26A	VPS26A	0.455057773179598	3.37601515280842e-25	0.491060551129923
CLPB	CLPB	CLPB	0.691609716477724	1.46074463625388e-67	0.851034857217314
MYO5A	MYO5A	MYO5A	0.247642808937045	6.09111167689996e-08	0.252900048940649
MARK1	MARK1	MARK1	0.338468564599473	5.9266698925581e-14	0.352361936661612
RP11.92K2.2	RP11.92K2.2	RP11.92K2.2	-0.0137342454751004	0.767459737014774	-0.0137351091341294
ME2	ME2	ME2	0.383031318209798	9.8633019660436e-18	0.40360735638329
LUC7L3	LUC7L3	LUC7L3	0.211219138433465	4.23831140138931e-06	0.214447071750354
EPB41	EPB41	EPB41	0.410392310997816	2.33493076426032e-20	0.436082898791878
GLUD1	GLUD1	GLUD1	0.497482018681083	1.65938905071308e-30	0.545954449673362
EIF3J.AS1	EIF3J.AS1	EIF3J.AS1	0.414130519170521	9.7787710285488e-21	0.440586555658513
COMP	COMP	COMP	0.0732583786296312	0.114265788852772	0.0733898563703202
GSTO1	GSTO1	GSTO1	0.41769677151438	4.21923463014146e-21	0.44489875932755
MED4	MED4	MED4	0.679358877681379	2.31750973133555e-64	0.827922440219214
FBLN1	FBLN1	FBLN1	0.0786944561611005	0.0897250817158528	0.0788575092459814
PAFAH2	PAFAH2	PAFAH2	0.531548237825656	2.42738318277654e-35	0.592300644392513
GTF2B	GTF2B	GTF2B	0.63278342457663	1.68735608835874e-53	0.746044831070759
SYNE2	SYNE2	SYNE2	0.3226661821536	9.43433114692532e-13	0.334620289033424
ALOX5	ALOX5	ALOX5	0.210062542002386	4.79468814157811e-06	0.213236774812373
CCDC85C	CCDC85C	CCDC85C	0.337998968603879	6.44962300259655e-14	0.351831677951391
DDX27	DDX27	DDX27	0.78606170532535	5.48697971932547e-99	1.06104033974631
EPSTI1	EPSTI1	EPSTI1	-0.00883352787245353	0.849167118521468	-0.00883375764684797
FAM65A	FAM65A	FAM65A	0.485716398720373	5.85126931327406e-29	0.530438745765638
COA7	COA7	COA7	0.638388604030216	1.04450795509414e-54	0.755449167924226
DHRS4L2	DHRS4L2	DHRS4L2	0.446492116716378	3.25851687204384e-24	0.48031033992182
MYO1D	MYO1D	MYO1D	0.209964993299228	4.84467547658016e-06	0.213134725127923
WWP2	WWP2	WWP2	0.473208089640026	2.22722045364548e-27	0.514196031097907
ARNT	ARNT	ARNT	0.719742879947393	1.4828166491989e-75	0.907111301262731
SF3B4	SF3B4	SF3B4	0.711137376600398	5.22483377584268e-73	0.889481168685184
TXNRD1	TXNRD1	TXNRD1	0.222747249655517	1.19365698131411e-06	0.226544931307711
RP11.848P1.3	RP11.848P1.3	RP11.848P1.3	0.0377014774381716	0.416811176582711	0.0377193556655498
ALS2	ALS2	ALS2	0.463568774889779	3.3273536633721e-26	0.50184736819367
TUBA1C	TUBA1C	TUBA1C	0.237578116661312	2.11069115637885e-07	0.242205780936189
ZFC3H1	ZFC3H1	ZFC3H1	0.506473544597373	9.91565594268261e-32	0.557975166217962
SSBP4	SSBP4	SSBP4	0.436186640601487	4.5837759833138e-23	0.467511720023758
NXT1	NXT1	NXT1	0.642894335023176	1.06972641098287e-55	0.763091542718097
GABPA	GABPA	GABPA	0.325837038377811	5.48395345835724e-13	0.338163700766286
MYO18A	MYO18A	MYO18A	0.447446658069715	2.53905148348309e-24	0.481503191240959
MARCH9	MARCH9	MARCH9	0.77788248549961	1.15251268756178e-95	1.0399858669148
PTPRE	PTPRE	PTPRE	0.194220221077222	2.42526841774836e-05	0.196719119339228
SH3D21	SH3D21	SH3D21	0.21686527661052	2.29827197560226e-06	0.220364321961374
KAT6B	KAT6B	KAT6B	0.347860185319503	1.05966116704597e-14	0.363007293685901
DDX1	DDX1	DDX1	0.479073325864835	4.118626687079e-28	0.521780874129388
URI1	URI1	URI1	0.533235558915636	1.35255501021251e-35	0.594655402126153
GPATCH4	GPATCH4	GPATCH4	0.499580433353214	8.66207916751267e-31	0.548746878512873
PRR14L	PRR14L	PRR14L	0.620056886978801	7.59044514751938e-51	0.72509750204541
AC007318.5	AC007318.5	AC007318.5	-0.00558317979812119	0.904323506040183	-0.0055832378119741
EMC7	EMC7	EMC7	0.589505515054579	5.97474608080938e-45	0.676907878095004
SMAD4	SMAD4	SMAD4	0.506705909094097	9.20906611950654e-32	0.558287750106379
LRRC29	LRRC29	LRRC29	0.428411639309876	3.17586271951032e-22	0.457949640508457
IL1RN	IL1RN	IL1RN	0.0562743639631794	0.225322974424497	0.0563338803846525
TMEM220	TMEM220	TMEM220	0.484539207132904	8.29444755062357e-29	0.528899230403324
PLEKHF1	PLEKHF1	PLEKHF1	0.134572524830046	0.00360886627308957	0.135393826529606
KIAA0513	KIAA0513	KIAA0513	0.315886384331843	2.94643533858613e-12	0.327070882728615
CORO1C	CORO1C	CORO1C	0.407411652156359	4.63741792372188e-20	0.432503808263701
ARHGAP9	ARHGAP9	ARHGAP9	-0.00474397078961576	0.918650481131776	-0.0047440063781932
FXYD3	FXYD3	FXYD3	0.108534765316783	0.0190997727329824	0.108963975469039
CENPO	CENPO	CENPO	0.593797709316641	9.67932900639422e-46	0.683511827643271
RCN2	RCN2	RCN2	0.463640366092905	3.26222528381641e-26	0.501938558953797
TRIM44	TRIM44	TRIM44	0.522868155517431	4.67064074158445e-34	0.580278961996552
TP73.AS1	TP73.AS1	TP73.AS1	0.191703948563973	3.10119451415615e-05	0.194105529886917
SLCO2B1	SLCO2B1	SLCO2B1	-0.00113314950671389	0.980537020103469	-0.00113314999171274
ATP2B1	ATP2B1	ATP2B1	0.140312301517729	0.00239880262804306	0.141244135287555
PELI3	PELI3	PELI3	0.626728062045194	3.19807419168398e-52	0.736009371168419
PALD1	PALD1	PALD1	0.122984266378154	0.00786451484987758	0.123610005902173
ATP6V1E1	ATP6V1E1	ATP6V1E1	0.681456677744364	6.731501642728e-65	0.831828640695902
PODN	PODN	PODN	-0.0361209581636574	0.436625595021434	-0.0361366797619799
TRIM37	TRIM37	TRIM37	0.567088645774462	5.23746510875043e-41	0.643220914368879
NUCKS1	NUCKS1	NUCKS1	0.683773260603003	1.69804827449646e-65	0.836166528183401
ARRB1	ARRB1	ARRB1	0.570553145586902	1.34722318003826e-41	0.648342581411575
ARHGDIB	ARHGDIB	ARHGDIB	0.0174719162668175	0.706781159369869	0.0174736944640097
DNAJB2	DNAJB2	DNAJB2	0.457468474221013	1.76293197460304e-25	0.49410504609625
ATP13A1	ATP13A1	ATP13A1	0.392842356569143	1.20353691398544e-18	0.415156666315502
HNRNPH3	HNRNPH3	HNRNPH3	0.29484194930347	8.43946096589946e-11	0.303860978371888
MS4A4A	MS4A4A	MS4A4A	0.0406094666994623	0.381767455122654	0.040631812227526
TULP3	TULP3	TULP3	0.579038826857678	4.52060028027876e-43	0.661015499681327
VPS33B	VPS33B	VPS33B	0.630708123437888	4.65895454281241e-53	0.742591153128174
ZNF69	ZNF69	ZNF69	0.180163509215989	9.19920975132255e-05	0.18215167805005
PLEKHA8P1	PLEKHA8P1	PLEKHA8P1	0.44342789934155	7.21988818460353e-24	0.476489663050745
PRCC	PRCC	PRCC	0.820978724400206	5.2272586197752e-115	1.15981236965587
PRR13P5	PRR13P5	PRR13P5	-0.0455494173799016	0.326521102253977	-0.0455809578615311
ZNF784	ZNF784	ZNF784	0.388389683732667	3.15410386943278e-18	0.409902256024416
FMNL3	FMNL3	FMNL3	0.268902728888101	3.67478277264282e-09	0.275680648140102
CYB5B	CYB5B	CYB5B	0.459266615118535	1.08217987478594e-25	0.496381465894045
MSH2	MSH2	MSH2	0.465108069492864	2.17302057111087e-26	0.503809779431514
GABARAPL1	GABARAPL1	GABARAPL1	0.357784152844378	1.61220460778365e-15	0.3743424464463
PRMT3	PRMT3	PRMT3	0.452321894206642	7.01335575227421e-25	0.487615572432623
RNF149	RNF149	RNF149	0.207273004375024	6.43773969456561e-06	0.210320242605294
PIGN	PIGN	PIGN	0.50551478869771	1.3444125936771e-31	0.556686463368572
ST3GAL4	ST3GAL4	ST3GAL4	0.323905676339006	7.63723560706832e-13	0.3360044470856
XRCC6BP1	XRCC6BP1	XRCC6BP1	0.889101221212731	1.3597889022757e-159	1.41761928407806
RPRD2	RPRD2	RPRD2	0.681030884187587	8.65871141546039e-65	0.83103411164299
FAM178A	FAM178A	FAM178A	0.478408735029428	4.99485672370135e-28	0.520918672718827
SNAPIN	SNAPIN	SNAPIN	0.68945756679374	5.47455160256879e-67	0.846921118538067
NFATC3	NFATC3	NFATC3	0.486767013849042	4.28064788531981e-29	0.531814673033194
SULF2	SULF2	SULF2	0.173142723625005	0.000172647602537769	0.174904707549516
IFNAR1	IFNAR1	IFNAR1	0.405726579056172	6.81440116760377e-20	0.430485034071036
SLAIN1	SLAIN1	SLAIN1	0.195560616503723	2.12482967324103e-05	0.198112436357919
SSH1	SSH1	SSH1	0.318756454787893	1.82577966163569e-12	0.330262310411865
AAAS	AAAS	AAAS	0.489169201280082	2.0862844348268e-29	0.534967621495832
PAN3	PAN3	PAN3	0.591777537167792	2.28753020172752e-45	0.680397170416068
SPTBN1	SPTBN1	SPTBN1	0.318264287364713	1.98266407157303e-12	0.329714575936447
ACSS1	ACSS1	ACSS1	0.526135574186207	1.54989861368071e-34	0.584786395726486
GAPDHS	GAPDHS	GAPDHS	0.0848214495046878	0.0673361413062106	0.0850257531860288
FAM117A	FAM117A	FAM117A	0.171853963785641	0.000193294791380525	0.173576423510834
CWF19L2	CWF19L2	CWF19L2	0.511686466051424	1.86245931976256e-32	0.565011742184077
TVP23B	TVP23B	TVP23B	0.367529087162785	2.37724197481338e-16	0.385563286227498
TMED10	TMED10	TMED10	0.551788164776538	1.74512411584697e-38	0.620948616260181
CDC7	CDC7	CDC7	0.455736213901688	2.81333109819546e-25	0.491916505163363
PFKM	PFKM	PFKM	0.596336301129292	3.25619863388173e-46	0.687442184021745
CD40	CD40	CD40	-0.0676047113170401	0.14507964671355	-0.0677079881313628
TYK2	TYK2	TYK2	0.552964890827758	1.12828118938428e-38	0.62264204001587
ARHGAP42	ARHGAP42	ARHGAP42	0.245683302960428	7.79192109887147e-08	0.250813596819816
DUSP12	DUSP12	DUSP12	0.55110685599998	2.2446483195224e-38	0.619969591463939
ORAOV1	ORAOV1	ORAOV1	0.892341670470792	2.07312649906376e-162	1.43330386169724
RPL37A	RPL37A	RPL37A	0.346691432004816	1.31700322406011e-14	0.361678257756199
DCTN5	DCTN5	DCTN5	0.421091929760272	1.87767626280186e-21	0.449018564040015
AC009948.5	AC009948.5	AC009948.5	0.248484207928449	5.47639699672395e-08	0.253796618882242
HSDL1	HSDL1	HSDL1	0.446143622782274	3.56854990286384e-24	0.479875157870623
VDR	VDR	VDR	0.235822971691494	2.60687304854882e-07	0.240346463100929
MSRB3	MSRB3	MSRB3	0.276200631204607	1.32192956695996e-09	0.283564223486134
OSER1	OSER1	OSER1	0.576866984943206	1.08797796700235e-42	0.657754325247115
PPAP2B	PPAP2B	PPAP2B	-0.00323448813722579	0.944483653474868	-0.00323449941694161
PHF12	PHF12	PHF12	0.552595552586324	1.29404103727156e-38	0.622110184945363
SLC6A15	SLC6A15	SLC6A15	0.178226611738677	0.000109703387022001	0.18015052096984
RP11.46D6.1	RP11.46D6.1	RP11.46D6.1	0.0783392241628648	0.0911875624219128	0.0785000736915211
SNED1	SNED1	SNED1	0.148718580206627	0.00128328032924891	0.149829777520529
DPYD	DPYD	DPYD	0.173135679907848	0.000172754605889688	0.174897446156243
FGD4	FGD4	FGD4	0.271924327561934	2.4153986731978e-09	0.278940631384295
MAFF	MAFF	MAFF	0.575509676772663	1.8773712735387e-42	0.655722446707501
ITGAL	ITGAL	ITGAL	-0.028124164313209	0.544776069784611	-0.028131582944733
WAPAL	WAPAL	WAPAL	0.474531901348528	1.525998951728e-27	0.515903190785726
SLC35A3	SLC35A3	SLC35A3	0.430720665365853	1.79669332049656e-22	0.460781161205123
TARS2	TARS2	TARS2	0.79793361419537	4.44695275127875e-104	1.09289850315783
EXOC6	EXOC6	EXOC6	0.295816805225193	7.26749918693286e-11	0.304928985385295
MAN1C1	MAN1C1	MAN1C1	0.194340427046241	2.39676215951449e-05	0.196844040435762
ATPIF1	ATPIF1	ATPIF1	0.439307071574773	2.07819342918647e-23	0.471371842728838
ATP2B4	ATP2B4	ATP2B4	0.426993023205525	4.49687208369757e-22	0.456213417891751
FAM19A5	FAM19A5	FAM19A5	0.334372221963136	1.23327389053718e-13	0.347742796024035
ZNF44	ZNF44	ZNF44	0.243957125340211	9.66288438497749e-08	0.248977360230099
SMARCB1	SMARCB1	SMARCB1	0.592113546273899	1.98345687314982e-45	0.680914425458322
MAPKAPK5	MAPKAPK5	MAPKAPK5	0.511076842459687	2.26810994895911e-32	0.564186240632165
ZNF808	ZNF808	ZNF808	0.229242710731612	5.66955113070283e-07	0.233390026166054
LDHD	LDHD	LDHD	0.229300819759354	5.6313506357841e-07	0.233451359197899
AP1B1	AP1B1	AP1B1	0.534896571572047	7.58106985588478e-36	0.59697923504341
SSBP3	SSBP3	SSBP3	0.189885916047754	3.69673770906511e-05	0.192218815254047
PDE6G	PDE6G	PDE6G	-0.00654770238425128	0.88789572369117	-0.00654779595857782
EXO1	EXO1	EXO1	0.421631431015942	1.64960390822535e-21	0.449674529073961
C16orf70	C16orf70	C16orf70	0.683973039623785	1.50696961383469e-65	0.836541828677852
ACSS2	ACSS2	ACSS2	0.210161440582381	4.74451196576398e-06	0.213340241124822
C17orf100	C17orf100	C17orf100	0.566889741072543	5.65932670080497e-41	0.642927770834909
YIPF1	YIPF1	YIPF1	0.513658186170654	9.8201161945476e-33	0.567686471236628
KCTD10	KCTD10	KCTD10	0.462692584884485	4.23648049191395e-26	0.500731927035279
RP11.259N19.1	RP11.259N19.1	RP11.259N19.1	0.273410318946928	1.96126435543055e-09	0.28054597650659
RPS25	RPS25	RPS25	0.476345793107925	9.06543743734976e-28	0.518246849461123
MYO1E	MYO1E	MYO1E	0.290918390402721	1.53166298771594e-10	0.299569274737659
CHID1	CHID1	CHID1	0.445502453215012	4.21691030820426e-24	0.47907493800336
FBXO42	FBXO42	FBXO42	0.759351836700098	1.22998668086445e-88	0.994682391063324
KCNE4	KCNE4	KCNE4	-0.00791779439101467	0.86464421030973	-0.00791795985662331
FPGT	FPGT	FPGT	0.418567782820462	3.43091374818188e-21	0.445954319134894
ANO6	ANO6	ANO6	0.275634691439964	1.43256434184278e-09	0.282951647986475
ADD3	ADD3	ADD3	0.172050014807107	0.00019001133147433	0.173778447886038
ASAP2	ASAP2	ASAP2	0.378033678988306	2.80343362964225e-17	0.397763473385078
UBL7	UBL7	UBL7	0.424922015979942	7.44980012907444e-22	0.453683354796617
ZDHHC7	ZDHHC7	ZDHHC7	0.58858919086375	8.78107791425803e-45	0.675504674540711
SRSF4	SRSF4	SRSF4	0.635126889819135	5.30968758810969e-54	0.749963019485802
ZMYM4	ZMYM4	ZMYM4	0.432302287810711	1.21316338662885e-22	0.462724669939396
SMURF2	SMURF2	SMURF2	0.216656960414603	2.35144546509278e-06	0.220145735390887
PSMD1	PSMD1	PSMD1	0.464836092849832	2.34328902653748e-26	0.503462782349198
EIF3M	EIF3M	EIF3M	0.422410518701231	1.36767666056887e-21	0.450622441702382
FBXL19	FBXL19	FBXL19	0.381921965817867	1.24566293633437e-17	0.402307909833963
HENMT1	HENMT1	HENMT1	0.350342578187265	6.65749621810504e-15	0.365834210136075
LAMB3	LAMB3	LAMB3	0.0484867833560013	0.29625915228556	0.0485248340052457
TMEM39B	TMEM39B	TMEM39B	0.443605973232367	6.89520631674806e-24	0.476711343001205
SHOC2	SHOC2	SHOC2	0.507884984578934	6.32298128855194e-32	0.559875407566476
NUMB	NUMB	NUMB	0.447668748724767	2.39559419133293e-24	0.481780911449457
STAM	STAM	STAM	0.544350708745479	2.64095394015449e-37	0.610317716140446
RPL27A	RPL27A	RPL27A	0.391895407943737	1.47903012688817e-18	0.414037403260133
DPP9	DPP9	DPP9	0.337994227230397	6.45512711731702e-14	0.351826325053785
PLEKHA5	PLEKHA5	PLEKHA5	0.197794748675514	1.70107334657433e-05	0.200436468105605
WDR75	WDR75	WDR75	0.378277826120851	2.6650696557173e-17	0.39804835977955
PASK	PASK	PASK	0.219000176393173	1.81566669394589e-06	0.222605675100156
PLTP	PLTP	PLTP	0.479020710887442	4.18206855293462e-28	0.521712588568637
DGKA	DGKA	DGKA	0.0508784542388161	0.273045908342392	0.0509224241641459
C10orf10	C10orf10	C10orf10	0.308081787701297	1.05513497336344e-11	0.318424650286535
ATAD1	ATAD1	ATAD1	0.539212391040899	1.65916741550573e-36	0.603044455725535
MIR210HG	MIR210HG	MIR210HG	0.197744492135869	1.70965324095655e-05	0.200384165878196
NMNAT1	NMNAT1	NMNAT1	0.49951907253283	8.82887896664069e-31	0.548665113149664
RWDD2B	RWDD2B	RWDD2B	0.410405389691538	2.32787585790424e-20	0.436098626451536
ORC2	ORC2	ORC2	0.39699407935781	4.8368356743816e-19	0.420075552906715
LYPLAL1	LYPLAL1	LYPLAL1	0.314822239820658	3.5139571679391e-12	0.325889224061208
BRWD1	BRWD1	BRWD1	0.461211253443428	6.36322378907707e-26	0.4988487191025
TEFM	TEFM	TEFM	0.495407825511696	3.141243257239e-30	0.54320185693393
CRAMP1L	CRAMP1L	CRAMP1L	0.41241676120682	1.45935468345704e-20	0.438519806065322
MED19	MED19	MED19	0.707619451775904	5.40135893263778e-72	0.882399672496442
RRP1B	RRP1B	RRP1B	0.446141297653934	3.57071324700583e-24	0.479872254932494
TMEM258	TMEM258	TMEM258	0.562742544754547	2.81235298228321e-40	0.636837717074663
PPT1	PPT1	PPT1	0.466675002057764	1.40520517039341e-26	0.505811111931986
DDX42	DDX42	DDX42	0.590546600573274	3.85188631635578e-45	0.678504955989591
PPFIBP1	PPFIBP1	PPFIBP1	0.373240218871297	7.50810780975963e-17	0.392182503279312
NT5DC3	NT5DC3	NT5DC3	0.325780140443006	5.53791163068215e-13	0.33810004577544
IGF1R	IGF1R	IGF1R	0.736746368224697	7.01530187363733e-81	0.943325395800632
TXNL1	TXNL1	TXNL1	0.552507108273231	1.33718862561987e-38	0.621982869607876
LIPA	LIPA	LIPA	0.307188527579853	1.21809398970348e-11	0.317438015563502
ESAM	ESAM	ESAM	0.122961595733877	0.00787604239777656	0.123586987160618
NEDD4L	NEDD4L	NEDD4L	0.243677533980126	1.00041213567009e-07	0.248680097524133
RPL5	RPL5	RPL5	0.318778396210647	1.81907578904319e-12	0.330286733533231
USP33	USP33	USP33	0.47971323917986	3.41915620160236e-28	0.52261173399133
NR4A1	NR4A1	NR4A1	0.671229995422644	2.53418019519498e-62	0.812978363224526
PRSS23	PRSS23	PRSS23	0.147404173959779	0.00141820483770293	0.148485910581501
FOXN2	FOXN2	FOXN2	0.303930005511899	2.04843385586223e-11	0.313843921110052
ZNF263	ZNF263	ZNF263	0.537235475060032	3.33672856604387e-36	0.600261298433595
PPP2R5A	PPP2R5A	PPP2R5A	0.329650333743853	2.8318500055491e-13	0.342435906753913
ARID5B	ARID5B	ARID5B	0.119361229416544	0.00990981343452214	0.119932975447793
POLRMT	POLRMT	POLRMT	0.530751124586635	3.19615071507162e-35	0.591190273059842
MPZL1	MPZL1	MPZL1	0.26083459609875	1.09869885328552e-08	0.267003720687853
NPL	NPL	NPL	0.0798504567735263	0.0850957372860901	0.0800208203807392
CSNK1G1	CSNK1G1	CSNK1G1	0.432931342629439	1.03713483194669e-22	0.463498564906492
FRZB	FRZB	FRZB	-0.0498214522419009	0.283147536436798	-0.0498627356323157
BUD13	BUD13	BUD13	0.684059417570551	1.43111745657223e-65	0.836704156076169
PPCDC	PPCDC	PPCDC	0.443266614228726	7.52695805911562e-24	0.476288920656388
IFT88	IFT88	IFT88	0.499782154067847	8.13540172017426e-31	0.54901572526076
NCK2	NCK2	NCK2	0.307153407684584	1.2249793356041e-11	0.317399236730045
SYNRG	SYNRG	SYNRG	0.46975772730029	5.9211350200947e-27	0.509759417214393
FRAT1	FRAT1	FRAT1	0.311179138811633	6.38837405984077e-12	0.321850439186403
ATXN1L	ATXN1L	ATXN1L	0.673445500637584	7.15533018856194e-63	0.817021549645798
LIMS1	LIMS1	LIMS1	0.282282794539366	5.50829978589329e-10	0.290160787258207
ITPR2	ITPR2	ITPR2	0.159879733328858	0.000531475341497342	0.161263272181663
SETBP1	SETBP1	SETBP1	0.199675850561104	1.40780286835272e-05	0.202394921176466
MAU2	MAU2	MAU2	0.637822485456564	1.38703506393607e-54	0.754494211251649
SVIL.AS1	SVIL.AS1	SVIL.AS1	0.444582242408116	5.35527839937882e-24	0.477927453084111
ZNFX1	ZNFX1	ZNFX1	0.340807190955665	3.88144544828861e-14	0.355005511485264
PPP1R13B	PPP1R13B	PPP1R13B	0.33757466274034	6.96085348198313e-14	0.351352723394148
NEK9	NEK9	NEK9	0.471883794476943	3.24576695403097e-27	0.51249100324718
RAB29	RAB29	RAB29	0.612651009082489	2.3379276294359e-49	0.71315431067314
CTSC	CTSC	CTSC	0.361532620913665	7.78030493256612e-16	0.378647843559449
SIRT1	SIRT1	SIRT1	0.397032785785108	4.79561186467031e-19	0.420121501780079
CREG1	CREG1	CREG1	0.118328003492919	0.0105737958663294	0.118884947027259
STRAP	STRAP	STRAP	0.536565557172171	4.2236708358143e-36	0.599320055820937
ZNF234	ZNF234	ZNF234	0.390100661854008	2.18196559106348e-18	0.411918758992645
PGD	PGD	PGD	0.507702725869394	6.70200976777487e-32	0.559629824004254
ARNTL	ARNTL	ARNTL	0.191208859193968	3.25368151071237e-05	0.193591602200452
LMF1	LMF1	LMF1	0.346793398225607	1.29230496652711e-14	0.36179415879397
NAPG	NAPG	NAPG	0.471974041508101	3.16369212401357e-27	0.512607108990055
PTMAP5	PTMAP5	PTMAP5	0.0146220557059607	0.752901443702654	0.0146230979268296
IFT81	IFT81	IFT81	0.209318186837096	5.18892663869105e-06	0.212458184971103
FDX1	FDX1	FDX1	0.199230435848841	1.47255303120833e-05	0.201931053059642
DUSP2	DUSP2	DUSP2	-0.0198864948799267	0.668520210233586	-0.0198891170239461
SEC24C	SEC24C	SEC24C	0.432380801915477	1.18967765943602e-22	0.462821233658481
CSRP2BP	CSRP2BP	CSRP2BP	0.648059686017661	7.48320196567829e-57	0.771946164193373
SIPA1L2	SIPA1L2	SIPA1L2	0.237026654882383	2.25586044849627e-07	0.241621411903152
NUP98	NUP98	NUP98	0.608284963606116	1.69075259684622e-48	0.706194511375032
RPL6	RPL6	RPL6	0.266543899974507	5.08088386538239e-09	0.273139692741917
KIAA1217	KIAA1217	KIAA1217	0.122258404460227	0.00824117477047514	0.122873063286717
NRGN	NRGN	NRGN	0.235488995596497	2.7132323144024e-07	0.23999284951606
TSR3	TSR3	TSR3	0.365175598693717	3.79716543656111e-16	0.382844957901235
FAM20B	FAM20B	FAM20B	0.567810835681448	3.95161451723596e-41	0.644286090176962
CTD.2553L13.10	CTD.2553L13.10	CTD.2553L13.10	0.251441066771877	3.75663408697771e-08	0.256950541910349
TIMM10	TIMM10	TIMM10	0.429173238135136	2.63314382851655e-22	0.458882815783554
RASAL2	RASAL2	RASAL2	0.308251235868067	1.02672055296501e-11	0.318611878920546
TUBGCP4	TUBGCP4	TUBGCP4	0.594904167057395	6.0276006695807e-46	0.685222633199633
PTPN1	PTPN1	PTPN1	0.431489877175717	1.48469721670223e-22	0.461725966900687
FAM117B	FAM117B	FAM117B	0.28498506484209	3.70778459430659e-10	0.293099471881102
ZNF544	ZNF544	ZNF544	0.256376587229607	1.98112945312256e-08	0.26222619581396
CBX7	CBX7	CBX7	0.288288403429618	2.27226912141521e-10	0.296698514474594
GINS2	GINS2	GINS2	0.341360020796853	3.51005286812218e-14	0.355631123859567
DIS3L2	DIS3L2	DIS3L2	0.447544521405367	2.47482131021573e-24	0.481625559002935
PRKD1	PRKD1	PRKD1	0.281775393873082	5.93048071135387e-10	0.289609540155457
SNX6	SNX6	SNX6	0.284490136632845	3.98783501078474e-10	0.292560876789987
NFRKB	NFRKB	NFRKB	0.627080890648695	2.69907360698945e-52	0.73659064626881
CLIP4	CLIP4	CLIP4	0.28138695868142	6.27478277401194e-10	0.28918765450454
ZNF550	ZNF550	ZNF550	0.336384416666393	8.61630418674502e-14	0.350010004335548
DHRS3	DHRS3	DHRS3	0.234757300082693	2.96104821110922e-07	0.239218336646225
DNAJC7	DNAJC7	DNAJC7	0.462246686603614	4.78934784218687e-26	0.500164714320827
COX16	COX16	COX16	0.595817678212585	4.07110682579932e-46	0.686637733531293
DCAF4	DCAF4	DCAF4	0.497028393257969	1.90863841175951e-30	0.545351815167208
SOX8	SOX8	SOX8	0.192417483481833	2.89328990267288e-05	0.194846393306035
ABI2	ABI2	ABI2	0.461004196154832	6.73446888578639e-26	0.498585749026617
RBM17	RBM17	RBM17	0.629505782590502	8.36183822733175e-53	0.740597104939393
GPRC5B	GPRC5B	GPRC5B	0.282241266260043	5.54172500508279e-10	0.290115663918773
ANKRD13A	ANKRD13A	ANKRD13A	0.202322875805056	1.07544112667331e-05	0.205153392600142
DNAJC1	DNAJC1	DNAJC1	0.376864619124643	3.5701770566164e-17	0.396400189062836
RP11.488L18.4	RP11.488L18.4	RP11.488L18.4	0.213677340869979	3.25349806533169e-06	0.217021469239905
TCEB3.AS1	TCEB3.AS1	TCEB3.AS1	0.632175989910655	2.2733064517624e-53	0.745032388169575
SWAP70	SWAP70	SWAP70	0.319795800984184	1.53330759077047e-12	0.331419630813983
SUZ12	SUZ12	SUZ12	0.366870912225607	2.71094524162923e-16	0.384802534670718
ASNA1	ASNA1	ASNA1	0.375964953248083	4.29739373917005e-17	0.395352008343471
LRRC41	LRRC41	LRRC41	0.586902162048794	1.77843707971234e-44	0.672927304166005
ATP11A	ATP11A	ATP11A	0.200350801310442	1.31481913128743e-05	0.20309799881008
ALKBH1	ALKBH1	ALKBH1	0.633991968405182	9.30660260517619e-54	0.748063041351216
HM13	HM13	HM13	0.362789816315237	6.08042920181876e-16	0.380094826651815
ARHGAP17	ARHGAP17	ARHGAP17	0.363335789328639	5.46124992538731e-16	0.380723693524894
QTRT1	QTRT1	QTRT1	0.507741499133572	6.61953763381381e-32	0.559682063711181
HS1BP3	HS1BP3	HS1BP3	0.383105412807452	9.71040644433292e-18	0.403694193592252
PSRC1	PSRC1	PSRC1	0.495061534426488	3.4929191758469e-30	0.542743036813854
STXBP3	STXBP3	STXBP3	0.597455158460433	2.00835822262132e-46	0.689180308915711
USP8	USP8	USP8	0.725720585996784	2.2121814840971e-77	0.919626313665008
IL2RB	IL2RB	IL2RB	-0.0427539598032878	0.357116460426263	-0.0427800384138238
SHISA2	SHISA2	SHISA2	0.24841214867066	5.52660345245567e-08	0.253719819039101
RP11.33O4.1	RP11.33O4.1	RP11.33O4.1	0.16435466318703	0.000367120860881446	0.165858995266607
FAM161A	FAM161A	FAM161A	0.199978207184085	1.36540141313869e-05	0.202709853307232
ATP9A	ATP9A	ATP9A	0.469278232005625	6.77697977285933e-27	0.509144327025886
ADCK4	ADCK4	ADCK4	0.374581823150838	5.70821373964934e-17	0.39374216313388
ESPL1	ESPL1	ESPL1	0.188786517280444	4.1077737775504e-05	0.191078539518839
NOP2	NOP2	NOP2	0.679336503492485	2.34813916161788e-64	0.827880890096869
PIKFYVE	PIKFYVE	PIKFYVE	0.322249394448223	1.01269009110291e-12	0.334155135061614
RP11.134G8.7	RP11.134G8.7	RP11.134G8.7	0.285977721811182	3.20260214582536e-10	0.294180208609538
SEC23B	SEC23B	SEC23B	0.575054653314842	2.25284553785729e-42	0.655042343277364
TMEM241	TMEM241	TMEM241	0.511549104270752	1.94708244370426e-32	0.564825677443726
SCRN3	SCRN3	SCRN3	0.381698371666442	1.30553016576257e-17	0.40204615771764
KIF26B	KIF26B	KIF26B	0.281584338644351	6.09746774174499e-10	0.289402019501071
SERTAD3	SERTAD3	SERTAD3	0.325217890448648	6.09983111798528e-13	0.337471166212864
DDIT4	DDIT4	DDIT4	0.120009341059336	0.00951246322211386	0.120590505955076
HEATR5A	HEATR5A	HEATR5A	0.338005412125996	6.44215028687039e-14	0.351838952565266
EFNA4	EFNA4	EFNA4	0.344587439650293	1.94343285430014e-14	0.359288804089599
ANKRD40	ANKRD40	ANKRD40	0.620673036586704	5.68362647409531e-51	0.726099131581419
APMAP	APMAP	APMAP	0.615717752294047	5.71771078050262e-50	0.718078631466139
PDIK1L	PDIK1L	PDIK1L	0.45190940364253	7.8261901720303e-25	0.487097102074244
IGHMBP2	IGHMBP2	IGHMBP2	0.769834619219992	1.56702154780881e-92	1.01992164416556
SNX29	SNX29	SNX29	0.223202274883398	1.13381613680346e-06	0.227023762976186
ARRB2	ARRB2	ARRB2	0.226992010335036	7.35656901249046e-07	0.231015774346432
ZNF281	ZNF281	ZNF281	0.56176738121854	4.08672491817847e-40	0.635411766564459
BMPR1A	BMPR1A	BMPR1A	0.199535363337732	1.42792751123322e-05	0.202248604339097
ABTB2	ABTB2	ABTB2	0.388673626052463	2.96745093596991e-18	0.4102366822813
RP11.421F16.3	RP11.421F16.3	RP11.421F16.3	0.361613674043504	7.65787725724844e-16	0.378741086866226
TCTN3	TCTN3	TCTN3	0.457213100024181	1.88900513486719e-25	0.49378213072429
DNTTIP1	DNTTIP1	DNTTIP1	0.335166611054639	1.07080871506101e-13	0.348637449504945
MKNK1	MKNK1	MKNK1	0.536124554982494	4.93121477048515e-36	0.598700961087579
POLR1B	POLR1B	POLR1B	0.338150368132867	6.27626567179665e-14	0.352002614596023
PPP2R5E	PPP2R5E	PPP2R5E	0.41026918417259	2.40238921150091e-20	0.435934843741729
ERBB3	ERBB3	ERBB3	0.180564769225525	8.86766024241848e-05	0.18256643046922
PPP2R5C	PPP2R5C	PPP2R5C	0.481815938506592	1.84971337762555e-28	0.525346544945687
NPLOC4	NPLOC4	NPLOC4	0.599234632988387	9.27581750709241e-47	0.691952151506098
DARS	DARS	DARS	0.40805006917312	4.00589651419314e-20	0.43326952078836
N6AMT2	N6AMT2	N6AMT2	0.430789201618487	1.76645231212224e-22	0.460865311535945
IDH1	IDH1	IDH1	0.224064813000778	1.02818670427229e-06	0.227931709340772
FANCF	FANCF	FANCF	0.415399361328	7.25942889852661e-21	0.442119029620136
NUBP1	NUBP1	NUBP1	0.448056115592052	2.16428171059522e-24	0.482265471814209
AGTRAP	AGTRAP	AGTRAP	0.422066245181076	1.48586041597662e-21	0.450203472067992
PSME4	PSME4	PSME4	0.401311653170945	1.84877294056095e-19	0.425211399247559
UFM1	UFM1	UFM1	0.472960827099557	2.38976395541232e-27	0.513877472246256
FNDC3A	FNDC3A	FNDC3A	0.405152602711406	7.76509631855014e-20	0.429798146197102
FAR1	FAR1	FAR1	0.431030140602998	1.66407233043737e-22	0.461161190204878
CHD4	CHD4	CHD4	0.286455319214288	2.98406607873778e-10	0.294700421840129
DHX37	DHX37	DHX37	0.527480048447671	9.80974614976658e-35	0.586647328918914
BNIP2	BNIP2	BNIP2	0.4992531880907	9.58913221555387e-31	0.548310890304589
ZNF329	ZNF329	ZNF329	0.208171492432463	5.85737309182212e-06	0.211259247416913
ZC3H4	ZC3H4	ZC3H4	0.203887002113274	9.1570224810006e-06	0.206784818242725
ZNF226	ZNF226	ZNF226	0.351712089301257	5.14259898654145e-15	0.367396188957026
TST	TST	TST	0.237683675341298	2.08394896553998e-07	0.242317657088397
CCDC24	CCDC24	CCDC24	0.22102376470282	1.44896622581972e-06	0.224732199252902
CXCL12	CXCL12	CXCL12	0.152357804920928	0.000968911612126013	0.153553390297862
IPO8	IPO8	IPO8	0.426626624765285	4.91821283378515e-22	0.455765406767115
COX6B1	COX6B1	COX6B1	0.364695969989258	4.17545369115774e-16	0.382291639236404
RASL12	RASL12	RASL12	0.0622607671210213	0.179687599660218	0.0623414040303329
CBX1	CBX1	CBX1	0.493659990665322	5.36018487836821e-30	0.540888178867787
FTH1P7	FTH1P7	FTH1P7	-0.032305356172141	0.486625849672531	-0.0323166015592703
TMEM231	TMEM231	TMEM231	0.520885360100708	9.0692324730406e-34	0.577554008755927
CIB2	CIB2	CIB2	0.471518786180613	3.59974382920145e-27	0.51202153791366
FAN1	FAN1	FAN1	0.452108390521347	7.423082066624e-25	0.487347183627884
RAP1A	RAP1A	RAP1A	0.431438205449179	1.50386566259696e-22	0.461662475546174
IFT46	IFT46	IFT46	0.650988174023725	1.61855817096644e-57	0.777011737015059
SNHG1	SNHG1	SNHG1	0.333808055131055	1.36307726968642e-13	0.347107747444222
USMG5	USMG5	USMG5	0.50680239637252	8.93051849973605e-32	0.558417576867645
ALG6	ALG6	ALG6	0.413565629501632	1.11611297737309e-20	0.439904922487466
DNAJC24	DNAJC24	DNAJC24	0.387539896432978	3.78450812920236e-18	0.408901898064593
UCK2	UCK2	UCK2	0.557080520101949	2.42102830667467e-39	0.6285899464132
HS2ST1	HS2ST1	HS2ST1	0.452722435423622	6.30403794883883e-25	0.48811925615773
GALC	GALC	GALC	0.350673218068713	6.25590150473289e-15	0.366211160564265
C1orf43	C1orf43	C1orf43	0.698087715062751	2.55065702474763e-69	0.863560747723759
PITPNB	PITPNB	PITPNB	0.61240698179097	2.6134265912106e-49	0.712763747158619
TMEM177	TMEM177	TMEM177	0.3411873347356	3.62215609120062e-14	0.355435674223468
YAF2	YAF2	YAF2	0.708793536534019	2.48673151243944e-72	0.884755177127577
TANK	TANK	TANK	0.254169319533273	2.64186306240871e-08	0.259865065535403
ADORA3	ADORA3	ADORA3	0.0174804729032201	0.706644190029379	0.017482253714556
FADS2	FADS2	FADS2	0.10840157893981	0.01924840187056	0.108829203452674
SMEK2	SMEK2	SMEK2	0.306782860520611	1.29998133387519e-11	0.316990140668564
RP11.166D19.1	RP11.166D19.1	RP11.166D19.1	0.213039711598909	3.48553154026992e-06	0.216353429531315
RPL23	RPL23	RPL23	0.279894382304934	7.78792066400237e-10	0.287567473594899
DYNC1H1	DYNC1H1	DYNC1H1	0.440056485521328	1.71652375716722e-23	0.472300853108898
LAD1	LAD1	LAD1	-0.0489848574851081	0.291319539335346	-0.0490240939771682
IPO9	IPO9	IPO9	0.752971789174841	2.31176014211603e-86	0.979782623967456
STAT6	STAT6	STAT6	0.564164280335553	1.62731085992899e-40	0.638920785790658
NUPL1	NUPL1	NUPL1	0.544702173333993	2.32628970292745e-37	0.61081731688133
TLN2	TLN2	TLN2	0.201987374716649	1.11300062135332e-05	0.204803596497366
TSPAN31	TSPAN31	TSPAN31	0.780552100198803	9.84074885427448e-97	1.04678195902012
ETNK2	ETNK2	ETNK2	0.473598063287497	1.99280246074048e-27	0.51469864602894
LYRM5	LYRM5	LYRM5	0.763021726928246	5.61566391700478e-90	1.00340802201548
C11orf80	C11orf80	C11orf80	0.576734718545124	1.14751145790479e-42	0.657556114180349
PDZD8	PDZD8	PDZD8	0.448597650328905	1.87745025631044e-24	0.482943234934004
LIG1	LIG1	LIG1	0.318693785786158	1.84506054663743e-12	0.33019255528672
SCAF11	SCAF11	SCAF11	0.534687025616249	8.15691648400122e-36	0.596685752376512
DCAF7	DCAF7	DCAF7	0.624267135715985	1.03783835542482e-51	0.731966788035773
DNAJC16	DNAJC16	DNAJC16	0.60637761802629	3.97447123603758e-48	0.70317248403341
CNNM1	CNNM1	CNNM1	0.236137735064875	2.51031469083666e-07	0.240679788265195
KDELC1	KDELC1	KDELC1	0.328878293121341	3.23970853144254e-13	0.341569987434792
RP11.50C13.1	RP11.50C13.1	RP11.50C13.1	0.27442097099289	1.70100148309435e-09	0.281638608623711
COPS2	COPS2	COPS2	0.484153580176078	9.29609978446586e-29	0.528395411939098
PRPF3	PRPF3	PRPF3	0.560649627146041	6.26258092460331e-40	0.633780115314414
COMMD7	COMMD7	COMMD7	0.441917147335867	1.06559365293565e-23	0.474610713293489
EIF2AK4	EIF2AK4	EIF2AK4	0.604026858583786	1.13065969107701e-47	0.69946307439575
TOM1	TOM1	TOM1	0.314616971233329	3.63511208472057e-12	0.325661388742043
TMEM51	TMEM51	TMEM51	0.432930355888364	1.03739017146087e-22	0.463497350561873
BORA	BORA	BORA	0.216770374514303	2.32235178992627e-06	0.2202647384471
ATP6V0A2	ATP6V0A2	ATP6V0A2	0.631565018234836	3.06599985820845e-53	0.744015355624436
SLC7A7	SLC7A7	SLC7A7	0.0603190982451013	0.193670543175465	0.0603924132349854
FITM2	FITM2	FITM2	0.529844645039226	4.36641563390663e-35	0.589929143742135
TRPC4AP	TRPC4AP	TRPC4AP	0.65173814717802	1.09055915607254e-57	0.778314393751651
NIFK	NIFK	NIFK	0.369955475097225	1.46093621671111e-16	0.388371513513949
MERTK	MERTK	MERTK	0.202262444053373	1.0821161827983e-05	0.20509038232164
NIPAL3	NIPAL3	NIPAL3	0.612209611280067	2.85962329102813e-49	0.712447994019452
KHDRBS1	KHDRBS1	KHDRBS1	0.219524405894859	1.71294289981962e-06	0.223156380293625
PICK1	PICK1	PICK1	0.636115021290617	3.25115411998655e-54	0.751620997979869
WNK1	WNK1	WNK1	0.470765038433157	4.45586437914885e-27	0.511052741851176
TBKBP1	TBKBP1	TBKBP1	0.203985427321031	9.06446024163517e-06	0.206887514589557
TNNT1	TNNT1	TNNT1	0.0518069341508607	0.264377610101015	0.0518533581530275
C3AR1	C3AR1	C3AR1	-0.0223173923104125	0.630848975941822	-0.0223210985961633
TPR	TPR	TPR	0.491855560859789	9.27628166718419e-30	0.538505115410693
KLC1	KLC1	KLC1	0.530470365921668	3.52077264674625e-35	0.590799490406396
AARS	AARS	AARS	0.606564673282178	3.65583489779779e-48	0.703468367304627
YIPF4	YIPF4	YIPF4	0.457597201034426	1.70257027506434e-25	0.494267854649963
KATNB1	KATNB1	KATNB1	0.551314900994107	2.07870231513157e-38	0.620268435170059
MRPS15	MRPS15	MRPS15	0.448148544541252	2.11243298565652e-24	0.482381123030247
SYTL2	SYTL2	SYTL2	0.14196867282254	0.00212611488366853	0.142934173651133
ARGLU1	ARGLU1	ARGLU1	0.466674802259801	1.40528348357583e-26	0.505810856505944
IFFO2	IFFO2	IFFO2	0.172070449737374	0.00018967211109962	0.173799506243145
AKTIP	AKTIP	AKTIP	0.415434255558263	7.20006734890484e-21	0.44216120149897
IPP	IPP	IPP	0.420905252086829	1.96362055917126e-21	0.448791672075932
C5AR1	C5AR1	C5AR1	-0.00473755353153601	0.918760144054582	-0.00473758897588338
DHX38	DHX38	DHX38	0.795785022255355	3.93045222944182e-103	1.08701214608715
TDP1	TDP1	TDP1	0.43604969097968	4.74481428460377e-23	0.467342604856524
AKAP8L	AKAP8L	AKAP8L	0.472392156730745	2.8094256088189e-27	0.51314519397946
ATPAF1	ATPAF1	ATPAF1	0.421231455607532	1.81587261309424e-21	0.449188175000127
ALDH18A1	ALDH18A1	ALDH18A1	0.275392328685511	1.48264814593856e-09	0.282689376831694
NME7	NME7	NME7	0.333489392934206	1.44221297817515e-13	0.346749167607956
TECR	TECR	TECR	0.234894802201838	2.91287392800459e-07	0.239363863598287
MSRB2	MSRB2	MSRB2	0.320318712252179	1.40401754558502e-12	0.332002220651105
AATF	AATF	AATF	0.554501966411411	6.36603680620225e-39	0.624858830759724
DTX4	DTX4	DTX4	0.15315613448861	0.000910233964600904	0.154370793771228
RP11.796A5.3	RP11.796A5.3	RP11.796A5.3	0.0289883559386272	0.532481049893507	0.0289964799130294
STX6	STX6	STX6	0.56071293064496	6.11326669234903e-40	0.633872443390127
MAP3K2	MAP3K2	MAP3K2	0.288357479200293	2.24896821484777e-10	0.296773853159078
ETV4	ETV4	ETV4	0.19371068904426	2.54971016763533e-05	0.19618966795662
RIT1	RIT1	RIT1	0.408140584243292	3.92350979092087e-20	0.433378122599268
DCAF11	DCAF11	DCAF11	0.594148470946473	8.33146983484043e-46	0.684053798954498
RP11.548H3.1	RP11.548H3.1	RP11.548H3.1	0.168034429447331	0.000268890893054299	0.16964329090129
CEMIP	CEMIP	CEMIP	0.116601470713341	0.0117716360490153	0.117134257841281
AKT2	AKT2	AKT2	0.468810680655187	7.72890246096401e-27	0.50854490011135
INPP4A	INPP4A	INPP4A	0.33460677796107	1.18294377352617e-13	0.348006900932885
NCOR1	NCOR1	NCOR1	0.517752799720336	2.56467201598643e-33	0.573264626214472
PEF1	PEF1	PEF1	0.640379340904462	3.83450735282601e-55	0.758816524171746
SIKE1	SIKE1	SIKE1	0.688977524826731	7.33915464617948e-67	0.846006716460048
AFF3	AFF3	AFF3	0.0799509646071802	0.0847025098857647	0.0801219739916318
TTLL5	TTLL5	TTLL5	0.529532317936696	4.86089280733842e-35	0.589495012467807
DNAJC8	DNAJC8	DNAJC8	0.633798736475558	1.02373127428942e-53	0.747740006470226
ACKR3	ACKR3	ACKR3	0.0576444007400076	0.214213485508673	0.0577083767557672
VPS29	VPS29	VPS29	0.457839639697438	1.59437849692355e-25	0.49457454731661
LYSMD2	LYSMD2	LYSMD2	0.446385806636153	3.35016269921339e-24	0.480177567211694
WRAP73	WRAP73	WRAP73	0.577424644632211	8.68869643980217e-43	0.658590518813109
NUDT16L1	NUDT16L1	NUDT16L1	0.372403483308745	8.90200193266373e-17	0.391210689228766
RAB11A	RAB11A	RAB11A	0.500270449820239	6.9880770454707e-31	0.54966680913783
CENPN	CENPN	CENPN	0.4568038265418	2.10987069853372e-25	0.493264811655041
C1orf53	C1orf53	C1orf53	0.45046721749446	1.14696515253597e-24	0.485286285809991
ST3GAL3	ST3GAL3	ST3GAL3	0.535557816006026	6.01520320829857e-36	0.597905955442815
PDE4B	PDE4B	PDE4B	0.118122404686971	0.0107105293509245	0.118676433789541
GBP5	GBP5	GBP5	-0.0217725499179117	0.639214007751843	-0.0217759912784875
ATP1B1	ATP1B1	ATP1B1	0.0330847207101858	0.476168901154569	0.0330968001423744
CPS1	CPS1	CPS1	0.156973855723071	0.00067237215367482	0.158282579715502
RCOR1	RCOR1	RCOR1	0.570687849229088	1.27752881321401e-41	0.648542322205577
USP54	USP54	USP54	0.270230261326908	3.05802471155924e-09	0.27711220661995
ZDHHC17	ZDHHC17	ZDHHC17	0.197563861777713	1.74083141275596e-05	0.200196191907696
METTL1	METTL1	METTL1	0.897943840759915	1.68815519742731e-167	1.46150157376798
PARS2	PARS2	PARS2	0.53901371092292	1.78022883896294e-36	0.602764370962451
LRRC8C	LRRC8C	LRRC8C	0.38619462310803	5.04444696978148e-18	0.407319844225457
VIPAS39	VIPAS39	VIPAS39	0.606489409351416	3.78087490767668e-48	0.703349302345763
RSAD2	RSAD2	RSAD2	-0.0646330665598113	0.163636208925274	-0.0647232929248067
CCDC106	CCDC106	CCDC106	0.283323497547482	4.73186660412766e-10	0.291291958811932
SLAMF7	SLAMF7	SLAMF7	-0.10468624870345	0.0238206824675916	-0.105071209429025
CEP350	CEP350	CEP350	0.381389541164369	1.39289695757197e-17	0.401684709032627
SP110	SP110	SP110	0.197134088254549	1.81719884498047e-05	0.19974900183565
GLIS2	GLIS2	GLIS2	0.103089674627276	0.0260573892168485	0.103457215630325
COG2	COG2	COG2	0.707291914471061	6.70166862466786e-72	0.881743950573346
NRIP1	NRIP1	NRIP1	0.230425574099724	4.93888226507579e-07	0.234638857653329
TMEM107	TMEM107	TMEM107	0.496414908542431	2.30553692294211e-30	0.544537383784118
USP2	USP2	USP2	0.120348740861156	0.00931008415331071	0.120934879548859
UNC45A	UNC45A	UNC45A	0.643355100596263	8.45534373491195e-56	0.763877308431769
KIAA1598	KIAA1598	KIAA1598	0.363927902149753	4.85967424617112e-16	0.381406030514978
DHCR7	DHCR7	DHCR7	0.244600802542107	8.91944007839396e-08	0.249661884541618
ELMSAN1	ELMSAN1	ELMSAN1	0.391503653273909	1.61037197969242e-18	0.413574648855635
TRIM62	TRIM62	TRIM62	0.323080317382815	8.79213626812195e-13	0.335082621061903
TICRR	TICRR	TICRR	0.490378041325257	1.44998031475997e-29	0.536557946208917
MTMR10	MTMR10	MTMR10	0.284467793182241	4.00095179610228e-10	0.292536565900908
ITGB3	ITGB3	ITGB3	0.0767164801142812	0.0981129285479582	0.0768675166813308
MLLT1	MLLT1	MLLT1	0.518368641213782	2.09241365121588e-33	0.574106384744468
SLC43A1	SLC43A1	SLC43A1	0.239188918959465	1.73635880402654e-07	0.243913635430266
EIF3D	EIF3D	EIF3D	0.67469083487447	3.49794215060576e-63	0.819303921783497
WRB	WRB	WRB	0.567577405450091	4.32865627717026e-41	0.643941657269821
NCOA1	NCOA1	NCOA1	0.356559959930115	2.0410657354936e-15	0.372939244095363
FXYD6	FXYD6	FXYD6	0.105920310420427	0.0222074658027187	0.106319108996093
NRP1	NRP1	NRP1	0.08487053053167	0.0671772631173848	0.0850751901015662
ARAP1	ARAP1	ARAP1	0.782870380639154	1.12922802241308e-97	1.05274270921083
INPP1	INPP1	INPP1	0.360924127807824	8.76286637807844e-16	0.377948035278826
ORC4	ORC4	ORC4	0.414974210445017	8.02261212481375e-21	0.441605326553904
RFC3	RFC3	RFC3	0.512629739691571	1.37192968087346e-32	0.566290421108537
APLP2	APLP2	APLP2	0.379403727589965	2.10910590346981e-17	0.399362928876789
MAP4K3	MAP4K3	MAP4K3	0.301777013843696	2.8776729416017e-11	0.311473513810175
MOCS3	MOCS3	MOCS3	0.744476208257854	1.9329176432964e-83	0.960447049358393
COBLL1	COBLL1	COBLL1	0.170113534886161	0.000224864473464293	0.171783579516712
ELF1	ELF1	ELF1	0.495007464219267	3.55123857110818e-30	0.542671415033609
GALNT18	GALNT18	GALNT18	0.107085451814125	0.020772139090579	0.10749761819847
IVD	IVD	IVD	0.606115648068655	4.46752251561653e-48	0.702758279362385
B4GAT1	B4GAT1	B4GAT1	0.504015509195874	2.15994888959216e-31	0.554674579362986
UBAC2	UBAC2	UBAC2	0.745629227594442	7.87844497504483e-84	0.963038710998228
ATP5C1	ATP5C1	ATP5C1	0.54148071962482	7.40027540290509e-37	0.606248198956128
LRRC8B	LRRC8B	LRRC8B	0.468056098169157	9.55117445069291e-27	0.507578193180375
USP32	USP32	USP32	0.498236766568263	1.31409725351754e-30	0.546957922412793
SERGEF	SERGEF	SERGEF	0.481582494363126	1.98069568466141e-28	0.525042567702443
ZW10	ZW10	ZW10	0.614303931713834	1.09652668377791e-49	0.715804734630693
ABHD12	ABHD12	ABHD12	0.453082536335037	5.72710026298827e-25	0.488572282049862
MAP4K4	MAP4K4	MAP4K4	0.299095421420206	4.37730724761543e-11	0.308525857828325
ATPAF2	ATPAF2	ATPAF2	0.626571765811043	3.44742120965578e-52	0.735752012874417
GCFC2	GCFC2	GCFC2	0.356903568644949	1.91051089707041e-15	0.373332955575328
KPNB1	KPNB1	KPNB1	0.512105916354918	1.62594238253331e-32	0.565580132100026
NDUFB10	NDUFB10	NDUFB10	0.414384015419132	9.21466786544443e-21	0.440892566077701
NCLN	NCLN	NCLN	0.374808258694079	5.44948789491046e-17	0.394005581688866
KDELR3	KDELR3	KDELR3	0.451572027438148	8.55961626161626e-25	0.486673225509251
POGK	POGK	POGK	0.76389835181856	2.66431697101761e-90	1.00550959314602
GNG12	GNG12	GNG12	0.379976394773994	1.87182325822847e-17	0.400032061254584
XRRA1	XRRA1	XRRA1	0.616079565492818	4.83749251151095e-50	0.71866157231351
PPP1CC	PPP1CC	PPP1CC	0.327249629988747	4.29771706046933e-13	0.339744896539178
LPGAT1	LPGAT1	LPGAT1	0.47256244033993	2.67665137221894e-27	0.51336441545051
CIITA	CIITA	CIITA	-0.0674293407480095	0.146128111050112	-0.0675318144656191
DAZAP2	DAZAP2	DAZAP2	0.746173473633606	5.14905663522618e-84	0.964265509861424
HMGN2P17	HMGN2P17	HMGN2P17	0.178600864370054	0.000106048953674128	0.180537078290972
CNOT2	CNOT2	CNOT2	0.870071659905441	1.19952597858898e-144	1.33337448074443
TOR3A	TOR3A	TOR3A	0.258825872078593	1.43495570345271e-08	0.264849564905805
GGNBP2	GGNBP2	GGNBP2	0.443466563698501	7.14813280191875e-24	0.476537791684392
CANT1	CANT1	CANT1	0.6743351082461	4.29291647637533e-63	0.81865125094163
RALY	RALY	RALY	0.513291595069066	1.10645947311874e-32	0.567188617861299
SMPD1	SMPD1	SMPD1	0.304949098155568	1.7423008885449e-11	0.314967115402247
E2F6	E2F6	E2F6	0.49294372279993	6.66653974072391e-30	0.539941552482073
GTSE1	GTSE1	GTSE1	0.515708410437426	5.0251349804147e-33	0.570475511608253
ANAPC16	ANAPC16	ANAPC16	0.5288275804773	6.1896535497016e-35	0.588516167583203
YIF1A	YIF1A	YIF1A	0.430960256252049	1.69314929690743e-22	0.461075362830135
ATF4	ATF4	ATF4	0.468890216561282	7.55812001332934e-27	0.508646845793079
PARP1	PARP1	PARP1	0.676836947515709	1.01059214231119e-63	0.823253763059869
UROS	UROS	UROS	0.597944189758149	1.62499430171817e-46	0.689941145114315
MICU1	MICU1	MICU1	0.652003311228253	9.48208255168324e-58	0.778775496874439
NAA38	NAA38	NAA38	0.442942475687027	8.18359689811815e-24	0.47588559187402
SEC61A2	SEC61A2	SEC61A2	0.380246892740177	1.76907314596583e-17	0.400348242649054
PDCD4	PDCD4	PDCD4	0.245825983785947	7.65398823197836e-08	0.250965448798246
BID	BID	BID	0.358658382252313	1.36143193312186e-15	0.375345374118381
SPC24	SPC24	SPC24	0.184668839413312	6.06445274192522e-05	0.186812095691807
UBL7.AS1	UBL7.AS1	UBL7.AS1	0.496911974765388	1.97836499775952e-30	0.54519721317174
FARP2	FARP2	FARP2	0.372908413923914	8.03310964117802e-17	0.39179704909985
LINC00839	LINC00839	LINC00839	0.125838493888109	0.00652810920579895	0.126509108367206
PHKB	PHKB	PHKB	0.457645712184372	1.6803563611272e-25	0.49432921591673
ZDHHC1	ZDHHC1	ZDHHC1	0.351512198583745	5.34050964277354e-15	0.367168099257988
QSER1	QSER1	QSER1	0.368817798452398	1.83651375576616e-16	0.387054077060769
TSPAN14	TSPAN14	TSPAN14	0.308728314098017	9.50674040783329e-12	0.319139133879126
RAB3GAP1	RAB3GAP1	RAB3GAP1	0.451684441543059	8.30799626689375e-25	0.486814443593441
CCDC8	CCDC8	CCDC8	0.170572051597413	0.000216109328012781	0.172255798457068
PTMA	PTMA	PTMA	0.364548796189793	4.29878317710719e-16	0.382121898492415
NBEA	NBEA	NBEA	0.22004847670077	1.61582840376002e-06	0.223707051901311
ARPC5	ARPC5	ARPC5	0.347720482041946	1.0876119208746e-14	0.362848366926513
ARHGAP25	ARHGAP25	ARHGAP25	-0.012416923013217	0.789211285106023	-0.0124175612192259
FAM129A	FAM129A	FAM129A	0.0513523015746055	0.268598148902969	0.0513975128119178
KIZ	KIZ	KIZ	0.380034830275715	1.84914062489263e-17	0.400100359282963
KNOP1	KNOP1	KNOP1	0.36338095297352	5.4128967802427e-16	0.380775727130639
NAMPTP1	NAMPTP1	NAMPTP1	-0.019380369416637	0.676473425350889	-0.0193827963775723
CTB.31O20.2	CTB.31O20.2	CTB.31O20.2	0.435747846667684	5.11972660947468e-23	0.466969953991642
PLAGL2	PLAGL2	PLAGL2	0.462338391981239	4.67010662820881e-26	0.500281345449324
SAMSN1	SAMSN1	SAMSN1	-0.0370533034419067	0.424872393138931	-0.0370702748355216
MYH10	MYH10	MYH10	0.254650366866333	2.481808280758e-08	0.26037940305199
METTL16	METTL16	METTL16	0.474322260724447	1.62034064952653e-27	0.515632658457623
COMMD6	COMMD6	COMMD6	0.575627481121381	1.79073026043782e-42	0.655898610432931
PPP1R7	PPP1R7	PPP1R7	0.597760567131735	1.75958701089416e-46	0.689655383399636
ATG16L1	ATG16L1	ATG16L1	0.315390009615306	3.19903066490235e-12	0.326519583441828
ZNF792	ZNF792	ZNF792	0.311310964140953	6.25257492599207e-12	0.321996404703974
DDB2	DDB2	DDB2	0.43837447615612	2.63469943790452e-23	0.470216809416648
HIVEP3	HIVEP3	HIVEP3	0.251009933626312	3.97005565867471e-08	0.256490365036583
DHX57	DHX57	DHX57	0.57051245520773	1.36900784858894e-41	0.648282253995283
APOL4	APOL4	APOL4	0.0200167655439045	0.666479089591992	0.0200194395652829
FUT8	FUT8	FUT8	0.241459029336664	1.31559648638414e-07	0.246322895379992
WAC.AS1	WAC.AS1	WAC.AS1	0.489734327497503	1.76028249987265e-29	0.5357107813949
MRPL37	MRPL37	MRPL37	0.499605234367772	8.5955496935513e-31	0.548779928597093
DR1	DR1	DR1	0.610419789761971	6.45077625889121e-49	0.70959019378663
CDC42EP1	CDC42EP1	CDC42EP1	0.183034429318989	7.0621797241805e-05	0.185120507064725
PARD3	PARD3	PARD3	0.348426109420346	9.53467693551327e-15	0.363651270106826
SLCO4A1	SLCO4A1	SLCO4A1	0.223215574977141	1.13211105834654e-06	0.227037760455481
CWC22	CWC22	CWC22	0.329701486903877	2.80667822715062e-13	0.34249329749596
HNRNPUL1	HNRNPUL1	HNRNPUL1	0.570663548490088	1.28983198994458e-41	0.648506285300573
CTC.444N24.8	CTC.444N24.8	CTC.444N24.8	0.38127551432532	1.42658745454351e-17	0.401551279622867
PYROXD1	PYROXD1	PYROXD1	0.161702268255384	0.000457660713911796	0.163134177594245
PARVA	PARVA	PARVA	0.446228963998672	3.49003593660471e-24	0.479981712148007
CCDC101	CCDC101	CCDC101	0.22318111049343	1.13653450113354e-06	0.227001489019496
RHOD	RHOD	RHOD	0.234559963194357	3.03152789857738e-07	0.239009500249048
CCDC57	CCDC57	CCDC57	0.243939621579615	9.68391375638927e-08	0.248958748893826
YWHAE	YWHAE	YWHAE	0.680220997850788	1.39609457637691e-64	0.829525235581099
UBQLN4	UBQLN4	UBQLN4	0.745153038540861	1.14200784871354e-83	0.961967159052771
PANX1	PANX1	PANX1	0.564157223018027	1.63174682818763e-40	0.638910433607751
NSFL1C	NSFL1C	NSFL1C	0.607908370169792	2.00249059630112e-48	0.705596951173939
APBB1IP	APBB1IP	APBB1IP	0.170489837460749	0.000217655314285737	0.172171121856817
CCDC91	CCDC91	CCDC91	0.348532793623748	9.34652528666592e-15	0.363772700574856
PLXNC1	PLXNC1	PLXNC1	0.154358912361382	0.000828002171713591	0.155602695662722
PEBP1	PEBP1	PEBP1	0.396570165975875	5.31179571115653e-19	0.419572429794762
ACTG2	ACTG2	ACTG2	0.0565982928126819	0.222659959707377	0.0566588442662211
GRK5	GRK5	GRK5	0.231853114722079	4.17720210976223e-07	0.236146970094821
NPTN	NPTN	NPTN	0.330671709061728	2.36868939616259e-13	0.343582239737368
RBL2	RBL2	RBL2	0.409588646846018	2.81136994852505e-20	0.435116849142061
LINC01291	LINC01291	LINC01291	0.124140405511267	0.00729625090648002	0.124784070380724
ST5	ST5	ST5	0.390552317828113	1.97901067432548e-18	0.41245159510495
OGFOD1	OGFOD1	OGFOD1	0.632733074357924	1.72960897244369e-53	0.745960860437903
ACTA2	ACTA2	ACTA2	0.0749328943708348	0.106201078710766	0.0750736166325298
ZNF518A	ZNF518A	ZNF518A	0.19182855054298	3.06389741757833e-05	0.194234888954562
ANXA2	ANXA2	ANXA2	0.182299934509028	7.55925913988809e-05	0.184360658108298
SPRYD4	SPRYD4	SPRYD4	0.322340496980224	9.97139281845464e-13	0.334256797702091
FKBP7	FKBP7	FKBP7	0.372379878881034	8.94480574188949e-17	0.391183284424338
UBE2N	UBE2N	UBE2N	0.53992778290888	1.28703744595727e-36	0.604053664627911
ST3GAL5	ST3GAL5	ST3GAL5	0.179072349350822	0.000101607981410713	0.181024140773362
RAB30	RAB30	RAB30	0.286390753605082	3.01273803433886e-10	0.29463008600902
PLCG1	PLCG1	PLCG1	0.541934982901558	6.29080325325629e-37	0.606891128164325
ZFHX3	ZFHX3	ZFHX3	0.373282137998436	7.4442287694671e-17	0.392231208160866
C12orf76	C12orf76	C12orf76	0.0767604085993479	0.0979200918201272	0.076911705384346
C22orf46	C22orf46	C22orf46	0.570348484447382	1.46038950914551e-41	0.648039193581443
STAMBPL1	STAMBPL1	STAMBPL1	0.151946729241477	0.00100046961799351	0.153132572549597
ZCCHC2	ZCCHC2	ZCCHC2	0.322424173908808	9.83061950131185e-13	0.334350179874505
CD55	CD55	CD55	0.109518510045209	0.0180326073273915	0.109959554538592
CCDC88A	CCDC88A	CCDC88A	0.210602087556262	4.52697933058552e-06	0.213801294556818
GCA	GCA	GCA	0.207503743745211	6.28367193553453e-06	0.210561352080238
CHUK	CHUK	CHUK	0.457767163549567	1.62598996279385e-25	0.494482853646713
PRKD3	PRKD3	PRKD3	0.160350923770366	0.000511398649300154	0.161746860343317
SLC11A2	SLC11A2	SLC11A2	0.459684877732856	9.65652446305715e-26	0.496911662564701
MDM4	MDM4	MDM4	0.455906726605563	2.68714883680331e-25	0.492131737351527
HMOX1	HMOX1	HMOX1	0.0414970020558174	0.371441575241085	0.0415208459917384
C2orf47	C2orf47	C2orf47	0.431454514850374	1.49778920992771e-22	0.461682515258982
GRASP	GRASP	GRASP	0.319812803455333	1.52892624670928e-12	0.331438570319072
CDK1	CDK1	CDK1	0.333605043440579	1.41298575517273e-13	0.346879295308826
TAF1B	TAF1B	TAF1B	0.354517468437514	3.01844373370241e-15	0.370601204993415
GDPD5	GDPD5	GDPD5	0.657128746767246	6.17502166941325e-59	0.787743345712494
PTPLAD1	PTPLAD1	PTPLAD1	0.39514654576657	7.26822292296637e-19	0.417884267592265
PRKRIR	PRKRIR	PRKRIR	0.754818075955455	5.16500788788683e-87	0.984059993994503
BMF	BMF	BMF	0.130337544202417	0.00483125799758691	0.131083212131073
MGAT4A	MGAT4A	MGAT4A	0.0477617428720484	0.303548990500513	0.0477981104375666
RASSF4	RASSF4	RASSF4	0.155955852891404	0.000729419587073133	0.157239029367038
ADPGK	ADPGK	ADPGK	0.590710346366585	3.59438788688502e-45	0.678756424593964
UBE2T	UBE2T	UBE2T	0.466591005721244	1.43851165925947e-26	0.505703734564349
MDM1	MDM1	MDM1	0.78077908482958	7.97031911251544e-97	1.04736313459482
IMPA2	IMPA2	IMPA2	0.268666487062908	3.79651752978906e-09	0.275426009934019
OAS1	OAS1	OAS1	0.1691617823585	0.000244107513853488	0.170803626872548
FANCI	FANCI	FANCI	0.514332857378014	7.8810666159864e-33	0.568603382630153
RFWD3	RFWD3	RFWD3	0.478197953135356	5.30949823357819e-28	0.52064536512728
CCND1	CCND1	CCND1	0.63302546609663	1.49811240156789e-53	0.746448615890642
SNRPA	SNRPA	SNRPA	0.135759168705227	0.00332075360116348	0.136602553769522
ZWILCH	ZWILCH	ZWILCH	0.311764827640314	5.80625445730514e-12	0.322499053197811
PUS7L	PUS7L	PUS7L	0.760819561188557	3.60320404861717e-89	0.998158199112092
PROSER3	PROSER3	PROSER3	0.424048471885714	9.20796315570834e-22	0.452617813031343
PRDX6	PRDX6	PRDX6	0.375829191063581	4.41909574460348e-17	0.395193906602511
BCL10	BCL10	BCL10	0.834473072963438	3.62066124805784e-122	1.20268934142188
EIF3K	EIF3K	EIF3K	0.522872967970842	4.66309941354301e-34	0.580285585188382
CKAP5	CKAP5	CKAP5	0.619126830150655	1.17325045430464e-50	0.723587928505054
SAE1	SAE1	SAE1	0.495065528956393	3.48864850621981e-30	0.542748328197985
COG6	COG6	COG6	0.537155060814827	3.43258247255579e-36	0.600148265197618
CUL3	CUL3	CUL3	0.431914267088145	1.33611769813261e-22	0.462247565410137
DCAF5	DCAF5	DCAF5	0.551556231452181	1.90138591988399e-38	0.620615214790102
PARG	PARG	PARG	0.400724761469013	2.10871800355324e-19	0.424512039560686
DCT	DCT	DCT	0.260739749537669	1.11269453446626e-08	0.266901952904892
KCTD12	KCTD12	KCTD12	0.15426415154803	0.000834222595058727	0.155505623358843
ANKRD44	ANKRD44	ANKRD44	0.110599147169312	0.0169206816229428	0.111053441973528
WDR20	WDR20	WDR20	0.469471741307894	6.41779154978636e-27	0.509392515431828
AGPS	AGPS	AGPS	0.376387714779445	3.93913982762268e-17	0.395844455397
DLGAP4	DLGAP4	DLGAP4	0.530516690815847	3.46504566118997e-35	0.590863957984597
RP11.705C15.2	RP11.705C15.2	RP11.705C15.2	0.172422399931157	0.000183918028794967	0.174162217664958
BPNT1	BPNT1	BPNT1	0.519151381185017	1.61454240145244e-33	0.57517732865388
APP	APP	APP	0.273211235232685	2.01690828231711e-09	0.28033082093231
ASAP3	ASAP3	ASAP3	0.319596560409627	1.5855735060959e-12	0.331197708527248
IFIH1	IFIH1	IFIH1	0.158557640268251	0.000591783689074454	0.159906791312243
TTC30B	TTC30B	TTC30B	0.217660041224855	2.10578306003931e-06	0.221198460523376
LGALS1	LGALS1	LGALS1	0.430962327827376	1.69228020541081e-22	0.461077906911719
SHISA4	SHISA4	SHISA4	0.263016961307801	8.19947936808545e-09	0.269346836851325
DHX35	DHX35	DHX35	0.674729349374413	3.42117764135326e-63	0.819374620908198
PRDM2	PRDM2	PRDM2	0.629644692050123	7.81649468368805e-53	0.740827226546379
C15orf52	C15orf52	C15orf52	0.385233378617076	6.18925968800184e-18	0.406190595241113
CUEDC1	CUEDC1	CUEDC1	0.334164606645492	1.27956893268918e-13	0.347509064642025
TLE3	TLE3	TLE3	0.2530445734429	3.05601499374749e-08	0.258663007113007
BBS5	BBS5	BBS5	0.111580366417623	0.01596348884486	0.112046921774247
ACLY	ACLY	ACLY	0.49602591091362	2.5984317075544e-30	0.544021311153476
IPMK	IPMK	IPMK	0.381356900324932	1.40246028603992e-17	0.401646512708435
RTTN	RTTN	RTTN	0.224780052491935	9.47819789820782e-07	0.228684882773382
PELI2	PELI2	PELI2	0.192304055302368	2.92543261441309e-05	0.194728606708337
CDKN1B	CDKN1B	CDKN1B	0.136569910174348	0.00313608962086207	0.13742861103482
RNF181	RNF181	RNF181	0.440987128490379	1.35283745475029e-23	0.473455582383952
SFI1	SFI1	SFI1	0.379645020987856	2.00572223079559e-17	0.39964482645144
MYO1C	MYO1C	MYO1C	0.488236018246051	2.76008959492752e-29	0.53374163580293
CALCOCO2	CALCOCO2	CALCOCO2	0.463460064405333	3.42871466584245e-26	0.501708910729615
ZNF195	ZNF195	ZNF195	0.290258339450954	1.691687105375e-10	0.298848347502396
CMTM3	CMTM3	CMTM3	0.428945271522444	2.78520748063947e-22	0.458603413483969
XKR8	XKR8	XKR8	0.272796090519136	2.13791627069483e-09	0.279882243268399
RALGPS2	RALGPS2	RALGPS2	0.266635698208588	5.01751742505184e-09	0.273238514231293
GOSR1	GOSR1	GOSR1	0.583488264172715	7.32475554156184e-44	0.667735408081806
DOCK1	DOCK1	DOCK1	0.391609594298565	1.57376187282051e-18	0.413699773575879
DHRS7B	DHRS7B	DHRS7B	0.584560921058626	4.70347431278454e-44	0.669363322026944
ZNF652	ZNF652	ZNF652	0.387947104907195	3.46831310752221e-18	0.40938116140821
SESTD1	SESTD1	SESTD1	0.280502210003605	7.13314857613315e-10	0.28822708839451
PPM1D	PPM1D	PPM1D	0.596465007270325	3.08042582037692e-46	0.687641943282167
ALDH3B1	ALDH3B1	ALDH3B1	0.518650484342085	1.90606519098166e-33	0.574491865110775
ADAR	ADAR	ADAR	0.582365702395501	1.16239591359104e-43	0.666035061368605
LTN1	LTN1	LTN1	0.343431688077878	2.40354943845433e-14	0.357977918738326
SSR2	SSR2	SSR2	0.620117174434115	7.37880622365687e-51	0.725195452056354
TEF	TEF	TEF	0.382926062554451	1.00845780497944e-17	0.403484009043135
PDCL3	PDCL3	PDCL3	0.489997280069875	1.62629964176872e-29	0.536056757290453
TROAP	TROAP	TROAP	0.306668487171505	1.32402383218027e-11	0.316863889531626
ROM1	ROM1	ROM1	0.345601923890038	1.61157284519348e-14	0.360440436813456
SH3PXD2A	SH3PXD2A	SH3PXD2A	0.190363684310257	3.53052494722359e-05	0.192714501309152
PTP4A2	PTP4A2	PTP4A2	0.531252883808995	2.68812559606278e-35	0.591889066227629
JMJD1C	JMJD1C	JMJD1C	0.354035057055893	3.30931808164926e-15	0.370049555094723
BCL2L11	BCL2L11	BCL2L11	0.143912058486997	0.0018424559392973	0.144918095377905
SMG1	SMG1	SMG1	0.157920740167226	0.000623048892789883	0.159253533854432
ZNF638	ZNF638	ZNF638	0.317438993046857	2.27580285983739e-12	0.328796531857102
ARHGAP23	ARHGAP23	ARHGAP23	0.222222373648676	1.26644687365099e-06	0.225992721164297
ANTXR1	ANTXR1	ANTXR1	0.120752501138837	0.00907432192525924	0.121344593987946
CSGALNACT2	CSGALNACT2	CSGALNACT2	0.409878702208821	2.62928360504631e-20	0.435465423811862
PEX11G	PEX11G	PEX11G	0.458222340675173	1.43725846731497e-25	0.495058851674222
TBCE	TBCE	TBCE	0.624729032917577	8.32764017456208e-52	0.732723993981722
TRIM25	TRIM25	TRIM25	0.138601562890894	0.00271360843980264	0.139499465450842
CDCA7	CDCA7	CDCA7	0.20546495782473	7.77603455258277e-06	0.208431768832696
PSMA4	PSMA4	PSMA4	0.423783607535892	9.81773611443507e-22	0.452294923958993
BIVM	BIVM	BIVM	0.500399020381244	6.71361233594032e-31	0.5498383131234
NDN	NDN	NDN	0.26922307230809	3.51574449823183e-09	0.276025992731987
YPEL2	YPEL2	YPEL2	0.19082689930065	3.37614816004535e-05	0.193195177629142
LGALS3	LGALS3	LGALS3	0.260861613436058	1.09474344628962e-08	0.267032710545326
PPP1R12A	PPP1R12A	PPP1R12A	0.172476700789503	0.000183044959509735	0.174218182863829
RBM42	RBM42	RBM42	0.390845132950925	1.85748280025876e-18	0.412797159004115
ST3GAL2	ST3GAL2	ST3GAL2	0.648766077366	5.18037700856111e-57	0.773165003744788
ILKAP	ILKAP	ILKAP	0.416224337242337	5.97702473013619e-21	0.44311646102325
NDUFAF5	NDUFAF5	NDUFAF5	0.534428448459139	8.92751591419475e-36	0.596323725247246
R3HDM2	R3HDM2	R3HDM2	0.531836645675853	2.19698501545957e-35	0.592702716875296
TPX2	TPX2	TPX2	0.336910721875847	7.84148637276604e-14	0.35060358049298
CD5	CD5	CD5	0.036952253145254	0.426137266410078	0.0369690859904489
ARHGAP5.AS1	ARHGAP5.AS1	ARHGAP5.AS1	0.197949720486749	1.67487302696174e-05	0.200597754844854
GPAM	GPAM	GPAM	0.299817135365515	3.91168906912653e-11	0.309318666166179
PXN	PXN	PXN	0.38552881288857	5.81259199479175e-18	0.406537560273995
ZKSCAN2	ZKSCAN2	ZKSCAN2	0.370667780689924	1.26537413563628e-16	0.389197021677512
ATP5SL	ATP5SL	ATP5SL	0.504756431276179	1.70927825421424e-31	0.555668312413081
CTNNBIP1	CTNNBIP1	CTNNBIP1	0.28550578797784	3.4338131294774e-10	0.293666316304206
IL17RA	IL17RA	IL17RA	0.418683413554558	3.3378403337491e-21	0.446094519642523
TSSC1	TSSC1	TSSC1	0.478631081653589	4.6829228958323e-28	0.521207053049334
RGS16	RGS16	RGS16	-0.0271261094785172	0.559148302920562	-0.0271327657813676
MRPS23	MRPS23	MRPS23	0.674463670072588	3.98679064870486e-63	0.818887063956484
EDEM3	EDEM3	EDEM3	0.349370718296862	7.99007225816633e-15	0.364726803953837
KAT7	KAT7	KAT7	0.627293919262727	2.43605191534726e-52	0.736941810118598
ARHGEF12	ARHGEF12	ARHGEF12	0.552994473863329	1.11595294034893e-38	0.622684653760517
BARD1	BARD1	BARD1	0.33518438682169	1.06742437358119e-13	0.348657474987021
PGAP1	PGAP1	PGAP1	0.35595279459515	2.29349973251494e-15	0.372243815956405
ATMIN	ATMIN	ATMIN	0.60215727133565	2.58082279361263e-47	0.696524760799449
JAM3	JAM3	JAM3	0.20742130891547	6.33830655917996e-06	0.210475209618606
FMN1	FMN1	FMN1	0.337990261010473	6.45973491539621e-14	0.351821847300941
AHCYL1	AHCYL1	AHCYL1	0.581893737222691	1.41073295020114e-43	0.665321179393399
RPLP0	RPLP0	RPLP0	0.283983874564058	4.29556064114601e-10	0.292010118577347
SERPINH1	SERPINH1	SERPINH1	0.400314233544092	2.31162117666786e-19	0.424023073748526
SEPW1	SEPW1	SEPW1	0.298042822370231	5.15465347355316e-11	0.307370243061137
ZNF236	ZNF236	ZNF236	0.356637922269929	2.01069653392691e-15	0.373028564692965
RHBDD3	RHBDD3	RHBDD3	0.559919971694373	8.26773768637388e-40	0.632716602922646
RP11.285F7.2	RP11.285F7.2	RP11.285F7.2	0.269081788075027	3.58504589674725e-09	0.275873674073329
SLCO3A1	SLCO3A1	SLCO3A1	0.138650382389223	0.00270412668177451	0.139549241503564
PELP1	PELP1	PELP1	0.573845523118913	3.65206763661404e-42	0.653237689482049
PHF5A	PHF5A	PHF5A	0.714251897668128	6.41445731795037e-74	0.895810695757727
PFKP	PFKP	PFKP	0.446859193666158	2.96069819860772e-24	0.480768910487135
CYTH4	CYTH4	CYTH4	-0.105956477653456	0.0221616509486645	-0.106355686739063
ATF1	ATF1	ATF1	0.91715503692082	1.65975603435598e-187	1.57081333408939
CCDC134	CCDC134	CCDC134	0.601666614062759	3.20208320456599e-47	0.695755346067771
DOCK10	DOCK10	DOCK10	0.154399050926906	0.000825380293119918	0.155643814201029
RCN1	RCN1	RCN1	0.334905852689936	1.12167956045217e-13	0.348343720240236
SEL1L	SEL1L	SEL1L	0.334110078811857	1.29200737706753e-13	0.347447683771424
ARID3A	ARID3A	ARID3A	0.272549130789242	2.2132145147307e-09	0.279615447151338
SLC46A3	SLC46A3	SLC46A3	-0.0587877307319993	0.205248223786725	-0.0588555949233487
ARFGEF2	ARFGEF2	ARFGEF2	0.671698507941686	1.94130842107837e-62	0.813831544935002
ECHDC3	ECHDC3	ECHDC3	0.483429311607417	1.15113119364095e-28	0.527449824632992
FH	FH	FH	0.568566508406466	2.94057508876456e-41	0.645402031840826
ARL14EP	ARL14EP	ARL14EP	0.474341059541393	1.61165072458752e-27	0.515656914699029
ACACA	ACACA	ACACA	0.42186481059868	1.55962166609689e-21	0.449958401459758
TESK2	TESK2	TESK2	0.30532589682862	1.64082261392918e-11	0.315382599330603
CTC.325H20.4	CTC.325H20.4	CTC.325H20.4	0.294137304786298	9.3992727307325e-11	0.303089421176059
CYP2R1	CYP2R1	CYP2R1	0.419212892799124	2.94247745364649e-21	0.446736715574756
GRAMD4	GRAMD4	GRAMD4	0.566272337077765	7.19531698445679e-41	0.642018467630675
RHBDF2	RHBDF2	RHBDF2	0.185346429966336	5.69116276981344e-05	0.187513700688449
HPS4	HPS4	HPS4	0.600187441589628	6.12141002956411e-47	0.693440109527495
KDM3A	KDM3A	KDM3A	0.288273997387051	2.2771581605496e-10	0.29668280268745
MRPL33	MRPL33	MRPL33	0.46776223246949	1.03705029302319e-26	0.507201954063948
FAH	FAH	FAH	0.387184043565551	4.08393371932569e-18	0.408483223342392
C11orf68	C11orf68	C11orf68	0.609033358084518	1.2070962794826e-48	0.707383318705036
LRPPRC	LRPPRC	LRPPRC	0.318795962231013	1.8137261080098e-12	0.330306286643636
ACADM	ACADM	ACADM	0.396246920550942	5.70455328153974e-19	0.419188919688182
ST3GAL4.AS1	ST3GAL4.AS1	ST3GAL4.AS1	0.309457557127139	8.44946717796038e-12	0.319945407041519
HHAT	HHAT	HHAT	0.287247319299476	2.65326007363516e-10	0.295563433784742
BTBD3	BTBD3	BTBD3	0.445803524839709	3.89913928608549e-24	0.479450623185351
MTG2	MTG2	MTG2	0.791819885966739	2.04862193248547e-101	1.07629172028511
RP5.1021I20.1	RP5.1021I20.1	RP5.1021I20.1	0.292375163987405	1.22890389955426e-10	0.301161478090917
AURKA	AURKA	AURKA	0.376461271991037	3.87987909501295e-17	0.395930155988129
SLC25A33	SLC25A33	SLC25A33	0.627821929008852	1.8887321603036e-52	0.737812867582227
UNC5B	UNC5B	UNC5B	0.0484475496126235	0.296650609674879	0.0484855078821953
VPS39	VPS39	VPS39	0.697780111103584	3.09878857351698e-69	0.862960999181886
ANKRD12	ANKRD12	ANKRD12	0.320204798977346	1.43124139679774e-12	0.33187528822251
FGR	FGR	FGR	0.0352231972840111	0.448117238931851	0.0352377749678814
C2orf88	C2orf88	C2orf88	0.160649404223495	0.000499047871112127	0.162053233052675
LINC00511	LINC00511	LINC00511	0.43841636560009	2.6068103107632e-23	0.470268665016663
MYBL2	MYBL2	MYBL2	0.26378105963905	7.39629966680095e-09	0.270167899791985
NAPB	NAPB	NAPB	0.486855436321926	4.16930610355334e-29	0.531930558687634
FEM1B	FEM1B	FEM1B	0.423403466083998	1.0763074139136e-21	0.451831657997482
ACBD3	ACBD3	ACBD3	0.529725210383858	4.54932854391569e-35	0.589763107292234
ING1	ING1	ING1	0.574296407586926	3.05072796215435e-42	0.653910207235362
TMEM123	TMEM123	TMEM123	0.774363340204667	2.80412157370506e-94	1.03113547523896
PVRL1	PVRL1	PVRL1	0.185897802498913	5.40352661471334e-05	0.188084749033816
PRKCA	PRKCA	PRKCA	0.190609997456384	3.44762246398999e-05	0.192970088498386
PICALM	PICALM	PICALM	0.5509900269304	2.34352364494477e-38	0.619801816916989
OLFML2B	OLFML2B	OLFML2B	-0.132227036394052	0.004245933024903	-0.133005841528935
PIK3C3	PIK3C3	PIK3C3	0.436777870695765	3.94826249617353e-23	0.468242099735159
GATAD2B	GATAD2B	GATAD2B	0.638458897004927	1.00832240960402e-54	0.755567822855777
MTHFS	MTHFS	MTHFS	0.375760677428333	4.48179397733598e-17	0.395114126237918
THOP1	THOP1	THOP1	0.356915953421417	1.90596164901911e-15	0.373347148283992
OTUB1	OTUB1	OTUB1	0.567289253498367	4.8435783286031e-41	0.643516666549504
PRPF18	PRPF18	PRPF18	0.603692579913095	1.31096742916403e-47	0.698936944109722
INTS4	INTS4	INTS4	0.942983356407214	8.14771876264964e-224	1.76431833267333
IGSF8	IGSF8	IGSF8	0.4249758467258	7.35301279051954e-22	0.453749048641801
UGGT2	UGGT2	UGGT2	0.452381823261283	6.9024186450466e-25	0.487690919085491
HSPA13	HSPA13	HSPA13	0.351838814492353	5.02087545984347e-15	0.367540810478698
TTLL12	TTLL12	TTLL12	0.665455844835056	6.50200332967911e-61	0.802542635642967
YIPF2	YIPF2	YIPF2	0.412244040051586	1.51925106402298e-20	0.438311704185114
ASCC1	ASCC1	ASCC1	0.540013870419449	1.24824661633452e-36	0.604175183095111
PPM1F	PPM1F	PPM1F	0.531255113682474	2.68605670891862e-35	0.591892172899681
SLC7A5	SLC7A5	SLC7A5	0.0774249554313045	0.0950395364248225	0.07758022544448
SEPT10	SEPT10	SEPT10	0.28582467622047	3.27587084562979e-10	0.294013539575621
FADD	FADD	FADD	0.816162793883642	1.34481782927434e-112	1.14521529136643
DNAJC22	DNAJC22	DNAJC22	0.205406890285867	7.82312956596525e-06	0.208371142630492
CDC123	CDC123	CDC123	0.586471191827415	2.12837050649873e-44	0.672270135701691
ABCA3	ABCA3	ABCA3	0.00234458712359149	0.959742422556757	0.00234459141974017
PRKCH	PRKCH	PRKCH	0.116055793208918	0.0121744015427416	0.116581094725144
CS	CS	CS	0.557567195905185	2.01531020192769e-39	0.629295897702707
NTPCR	NTPCR	NTPCR	0.597106609921896	2.33511676089352e-46	0.688638458077899
FTH1P2	FTH1P2	FTH1P2	-0.0224851969632103	0.62828205294732	-0.0224889874990294
WIBG	WIBG	WIBG	0.378925404113968	2.32977656556422e-17	0.398804292611239
TUB	TUB	TUB	0.101750637149681	0.0280706088417434	0.102103982679415
TRAK2	TRAK2	TRAK2	0.0955953249290772	0.0391313175967019	0.0958881303025025
DESI1	DESI1	DESI1	0.790843245465075	5.353487115196e-101	1.07367894111146
DOCK9	DOCK9	DOCK9	0.20074671496439	1.26302594020967e-05	0.203510503321061
SDS	SDS	SDS	-0.0333274727239261	0.472937081943791	-0.0333398201220447
TCN2	TCN2	TCN2	0.15090132150954	0.00108504669581646	0.152062631787405
GBF1	GBF1	GBF1	0.472085997489622	3.06472016811803e-27	0.512751161691232
BHLHE41	BHLHE41	BHLHE41	0.131596541991334	0.00443370399544081	0.132364181761423
TIMM17A	TIMM17A	TIMM17A	0.536851238719719	3.82000143093037e-36	0.599721325466221
NEK8	NEK8	NEK8	0.411105699444835	1.97927361849913e-20	0.436941074140134
AUNIP	AUNIP	AUNIP	0.524497354384101	2.6986821609666e-34	0.582523792598385
NUDT22	NUDT22	NUDT22	0.466646467539378	1.41643340149659e-26	0.505774633402457
RHOG	RHOG	RHOG	0.314706225442172	3.58193840277017e-12	0.325760451327957
CAPN10	CAPN10	CAPN10	0.498185397628617	1.33515444456209e-30	0.546889593182171
MARCH8	MARCH8	MARCH8	0.52023705830092	1.12561173541812e-33	0.576664725320704
MNS1	MNS1	MNS1	0.244786780090253	8.71512389326639e-08	0.249859706702556
CCR7	CCR7	CCR7	-0.0404088202352135	0.38412594355697	-0.0404308359624156
SNX1	SNX1	SNX1	0.357500130569527	1.70304355256788e-15	0.374016767221799
ZNF689	ZNF689	ZNF689	0.134533519878408	0.00361871002308529	0.135354102391678
ADPRHL2	ADPRHL2	ADPRHL2	0.61907836161302	1.20013262159619e-50	0.723509336650846
VAPA	VAPA	VAPA	0.611319597023245	4.28820951139383e-49	0.711025663997851
ZFYVE26	ZFYVE26	ZFYVE26	0.466287041328287	1.5656910437972e-26	0.505315249207527
ATOH8	ATOH8	ATOH8	0.0803169146473223	0.083283128532217	0.0804902891527484
TMEM194A	TMEM194A	TMEM194A	0.536909126902866	3.74298700645239e-36	0.599802656547067
SLC30A7	SLC30A7	SLC30A7	0.510061884853856	3.14600000263102e-32	0.562813412403752
TYR	TYR	TYR	0.212347094023608	3.75547269404323e-06	0.215627994333205
CPXM2	CPXM2	CPXM2	0.039693733832088	0.392603412519977	0.0397146006120157
STON1	STON1	STON1	0.0105127345679762	0.820940481646486	0.0105131218743485
CCDC82	CCDC82	CCDC82	0.43947336919431	1.99194692201888e-23	0.471577927935341
PECAM1	PECAM1	PECAM1	-0.131169737237611	0.00456503686763541	-0.13192988029309
MFSD12	MFSD12	MFSD12	0.0599399470300539	0.196491528080112	0.0600118861971695
PABPC1L	PABPC1L	PABPC1L	0.364034690989374	4.75833297049028e-16	0.381529127542487
PNPLA6	PNPLA6	PNPLA6	0.872357547233067	2.58542135473374e-146	1.34286030937026
C18orf8	C18orf8	C18orf8	0.539715557265965	1.3878408933497e-36	0.603754161561524
ARHGEF15	ARHGEF15	ARHGEF15	0.082947486555287	0.0736365848648684	0.0831385098849635
DHCR24	DHCR24	DHCR24	0.145757004898757	0.00160566744415076	0.146802573138334
KIAA1033	KIAA1033	KIAA1033	0.270521651095807	2.93676392471792e-09	0.277426577927011
TMEM81	TMEM81	TMEM81	0.541118150576264	8.42313139741119e-37	0.605735367742734
ALG1	ALG1	ALG1	0.422935034534921	1.20521480914375e-21	0.451261045603997
RAP1GAP	RAP1GAP	RAP1GAP	0.299012904532135	4.43386835809678e-11	0.308435236354341
BLM	BLM	BLM	0.474342530731055	1.61097260067272e-27	0.515658813008611
CAMK2G	CAMK2G	CAMK2G	0.446873534518066	2.94962555700281e-24	0.480786829598227
GRWD1	GRWD1	GRWD1	0.49981402802496	8.055131693418e-31	0.549058212434511
KIRREL	KIRREL	KIRREL	0.364272472057973	4.54008012875245e-16	0.381803260834394
AIFM2	AIFM2	AIFM2	0.444375006565744	5.65082615723243e-24	0.477669195561536
APPBP2	APPBP2	APPBP2	0.502671232820017	3.29762503585031e-31	0.552874157203543
ASF1B	ASF1B	ASF1B	0.156333145064957	0.000707773343292319	0.157625750227369
FAM109B	FAM109B	FAM109B	0.687284433724815	2.05421191369404e-66	0.842790814081459
MCAM	MCAM	MCAM	0.148782017135242	0.0012770774917373	0.149894649856734
HOXB2	HOXB2	HOXB2	0.0992968909315495	0.0321077041612076	0.0996251868678477
RDX	RDX	RDX	0.394845727657212	7.76463306723173e-19	0.417527838757029
DUSP16	DUSP16	DUSP16	0.270724666934727	2.85505185503826e-09	0.277645636970944
SMG5	SMG5	SMG5	0.588162904467327	1.04993682631935e-44	0.67485267462834
TMTC2	TMTC2	TMTC2	0.142275075483469	0.00207889200389836	0.14324689281244
PTPN2	PTPN2	PTPN2	0.44825700183236	2.05315531756176e-24	0.482516844909945
MAST3	MAST3	MAST3	0.272317120754607	2.28629653685291e-09	0.27936483686811
WDR47	WDR47	WDR47	0.503001242092472	2.97280003297563e-31	0.553315844623991
MEIS2	MEIS2	MEIS2	0.22829759912579	6.32694518688358e-07	0.232392719651482
KREMEN2	KREMEN2	KREMEN2	0.0718197424044609	0.121571478868565	0.0719436098638126
CDPF1	CDPF1	CDPF1	0.684403341116858	1.16491310212479e-65	0.837350838745211
C1orf216	C1orf216	C1orf216	0.519718641844843	1.33741253266742e-33	0.575954198829076
CPSF7	CPSF7	CPSF7	0.71879779916562	2.85407789452515e-75	0.905153192482815
FLT1	FLT1	FLT1	-0.0101725506129042	0.826641414376658	-0.0101729015225361
HEATR6	HEATR6	HEATR6	0.688159131849822	1.20808117446721e-66	0.844450461709873
WDR11	WDR11	WDR11	0.426209555852502	5.44534596684003e-22	0.455255647005799
STK11IP	STK11IP	STK11IP	0.427987091268143	3.52485185324507e-22	0.457429772146146
SOX13	SOX13	SOX13	0.276190669871594	1.32380311224156e-09	0.283553439507707
OGFR	OGFR	OGFR	0.507187712905845	7.89888926477408e-32	0.55893620319419
STIP1	STIP1	STIP1	0.535589147653355	5.94954500227231e-36	0.597949888923945
PACSIN2	PACSIN2	PACSIN2	0.630070428122572	6.35551544917388e-53	0.741532929530829
UHRF1	UHRF1	UHRF1	0.185587920779727	5.56344832469615e-05	0.18776379423949
RNASEH1	RNASEH1	RNASEH1	0.508368429179079	5.41731389152665e-32	0.560527119491196
P3H4	P3H4	P3H4	0.214834813451886	2.86950982729113e-06	0.218234633078007
SDR39U1	SDR39U1	SDR39U1	0.434291275152627	7.3817444398903e-23	0.465173397975843
KMT2A	KMT2A	KMT2A	0.546685434988084	1.13380177420737e-37	0.613641601336596
DHX40	DHX40	DHX40	0.558192877644296	1.59125077416701e-39	0.630204302460953
ZNF440	ZNF440	ZNF440	0.197357789862096	1.77706035721098e-05	0.199981759088817
TBC1D15	TBC1D15	TBC1D15	0.805549062877137	1.58175033529254e-107	1.11422006726438
KIFC3	KIFC3	KIFC3	0.488885207045747	2.27197798037072e-29	0.534594363499418
MPC2	MPC2	MPC2	0.452068223439342	7.50276553987875e-25	0.487296698125073
CTSS	CTSS	CTSS	-0.18603561449525	5.33380905879651e-05	-0.188227497798986
CD46	CD46	CD46	0.369927245384116	1.46926982918968e-16	0.388338807808917
UAP1	UAP1	UAP1	0.222811884882789	1.18497586576219e-06	0.226612941953384
LINC00641	LINC00641	LINC00641	-0.0276387842474927	0.551742774494977	-0.0276458252527832
C20orf194	C20orf194	C20orf194	0.401139780791683	1.9214425782873e-19	0.42500654977387
CAPN5	CAPN5	CAPN5	0.699539186786231	1.01456706725112e-69	0.866397543254832
RINL	RINL	RINL	0.205674333153195	7.608456559666e-06	0.208650382532
FTO	FTO	FTO	0.522447481094601	5.37872204975697e-34	0.579700181352026
WDR7	WDR7	WDR7	0.409748472789261	2.70955252293248e-20	0.435308908003873
SMC6	SMC6	SMC6	0.28864361838014	2.15490002727138e-10	0.297085970684572
UBE2Z	UBE2Z	UBE2Z	0.741772681776113	1.55577493880406e-82	0.954409190422322
ARL8A	ARL8A	ARL8A	0.602963175942999	1.80944453677939e-47	0.697790074092889
GON4L	GON4L	GON4L	0.65912829049576	2.09665705138301e-59	0.791270714591602
ARL5B	ARL5B	ARL5B	0.315242126981836	3.27829407372019e-12	0.326355374457235
RP11.312J18.5	RP11.312J18.5	RP11.312J18.5	0.000521116563491449	0.991048602290955	0.000521116610663334
N6AMT1	N6AMT1	N6AMT1	0.4521065822087	7.42665136441454e-25	0.487344910732803
LRRC28	LRRC28	LRRC28	0.89442525156475	2.86666615792801e-164	1.44362577808709
DENND5A	DENND5A	DENND5A	0.550321157141519	2.99853507786732e-38	0.618841870585748
EVA1C	EVA1C	EVA1C	0.149266011406657	0.00123065323974756	0.150389636888315
STK17B	STK17B	STK17B	0.0337773676874584	0.466979462770266	0.0337902221399916
ARMC7	ARMC7	ARMC7	0.590196486310656	4.46544146769477e-45	0.677967526975399
NUP107	NUP107	NUP107	0.8560315268642	4.62866342875326e-135	1.27830078030497
TMEM106A	TMEM106A	TMEM106A	0.255230654769026	2.30119217710998e-08	0.261000028306888
GNA11	GNA11	GNA11	0.461646284388385	5.64784036302684e-26	0.499401431702827
CEP55	CEP55	CEP55	0.403337688615006	1.17157773205203e-19	0.427628715372172
TMEM201	TMEM201	TMEM201	0.458830179244544	1.21858308547795e-25	0.495828507634323
RPL13AP20	RPL13AP20	RPL13AP20	0.133615350312995	0.00385757440660469	0.134419125656859
EXT2	EXT2	EXT2	0.514414359712998	7.67414549474302e-33	0.568714206864352
FAM45A	FAM45A	FAM45A	0.525606830337595	1.85430784126716e-34	0.584055540844783
RPAP1	RPAP1	RPAP1	0.579242409671241	4.16194066226275e-43	0.661321825287502
CSE1L	CSE1L	CSE1L	0.735769917290357	1.45540547385665e-80	0.941193050654835
GAREM	GAREM	GAREM	0.121292607266479	0.00876725750165859	0.121892728357064
RPL13AP25	RPL13AP25	RPL13AP25	0.0643758019066757	0.165322966892732	0.0644649533652905
FOXD3.AS1	FOXD3.AS1	FOXD3.AS1	0.383425458581638	9.07633724262311e-18	0.404069346477325
LIG3	LIG3	LIG3	0.484194661935416	9.18393916183805e-29	0.528449073222173
FRMD4A	FRMD4A	FRMD4A	0.250923189807734	4.01439008866269e-08	0.256397790482291
EIF4A1	EIF4A1	EIF4A1	0.244045331426815	9.55758053884832e-08	0.249071150255983
MINOS1	MINOS1	MINOS1	0.454625907753216	3.79067743660262e-25	0.490516035744414
TMX3	TMX3	TMX3	0.372801889934462	8.20918792168604e-17	0.391673324844984
LDHB	LDHB	LDHB	0.429946606720899	2.17579601452496e-22	0.459831177869189
IL17D	IL17D	IL17D	0.306877837244979	1.28034059873221e-11	0.317094988254673
STAT5A	STAT5A	STAT5A	0.234162461203634	3.17843100409106e-07	0.238588896516725
SIVA1	SIVA1	SIVA1	0.446999239539008	2.85430168608316e-24	0.480943912205634
PRMT6	PRMT6	PRMT6	0.50927612254857	4.04984762459103e-32	0.561751911967084
CASP7	CASP7	CASP7	0.323256815771075	8.53162489122303e-13	0.335279702195003
CCDC88B	CCDC88B	CCDC88B	0.0507148354823367	0.274593309110139	0.0507583821297782
EWSR1	EWSR1	EWSR1	0.371540988687024	1.06046688214034e-16	0.3902096933705
BAZ1A	BAZ1A	BAZ1A	0.183525547594611	6.74718157589523e-05	0.185628696215363
NCKAP1	NCKAP1	NCKAP1	0.38504416346748	6.4430119276671e-18	0.405968425190699
HEATR5B	HEATR5B	HEATR5B	0.411287507479658	1.89752744235739e-20	0.437159878134531
TNRC6C.AS1	TNRC6C.AS1	TNRC6C.AS1	0.00161747258947066	0.972221134462192	0.00161747400002624
CYP26B1	CYP26B1	CYP26B1	0.0631003261057337	0.173878691719144	0.0631842745780652
MTHFR	MTHFR	MTHFR	0.368261650720375	2.053166325665e-16	0.38641052046055
C19orf26	C19orf26	C19orf26	0.303663316680821	2.13684725354312e-11	0.313550116324408
CHORDC1	CHORDC1	CHORDC1	0.510661443754894	2.59344972677618e-32	0.563624141071728
BROX	BROX	BROX	0.529441056261302	5.01557499766234e-35	0.589368197410818
SGTA	SGTA	SGTA	0.460105902141381	8.60887772384649e-26	0.497445621268228
LRIG2	LRIG2	LRIG2	0.612578549657038	2.41657788772543e-49	0.713038320498127
BMPR2	BMPR2	BMPR2	0.119682302853184	0.00971116106925157	0.120258702039168
FBXW4	FBXW4	FBXW4	0.518401429967516	2.0698396761444e-33	0.574151222413049
RFTN2	RFTN2	RFTN2	0.226145370215121	8.10829896488185e-07	0.230123321550845
SAMD8	SAMD8	SAMD8	0.39992578670627	2.52126071339841e-19	0.423560584156289
UBE3A	UBE3A	UBE3A	0.51731588521542	2.96228968745213e-33	0.57266787741661
TRIM69	TRIM69	TRIM69	0.247920600207615	5.88113915973533e-08	0.253196011035232
CDR2L	CDR2L	CDR2L	0.172972119108863	0.000175256862581225	0.174728835874779
AC026271.5	AC026271.5	AC026271.5	0.0318977232454477	0.492144051024105	0.0319085481242265
RP11.254F7.2	RP11.254F7.2	RP11.254F7.2	0.256855567921595	1.86051708097999e-08	0.262738941768333
AC079922.2	AC079922.2	AC079922.2	-0.093206979002198	0.0443214475243981	-0.0934783078695601
SHC1	SHC1	SHC1	0.299716734495485	3.97344483519066e-11	0.30920835248487
FAM60A	FAM60A	FAM60A	0.358613194308763	1.37339891047932e-15	0.375293516232837
CFLAR	CFLAR	CFLAR	0.158300579028833	0.00060422328895269	0.159643111772039
FHOD1	FHOD1	FHOD1	0.4085469552282	3.57373856694965e-20	0.433865813424566
PPP1R12B	PPP1R12B	PPP1R12B	0.0792911824002117	0.0873107959369411	0.0794579823749179
ZSWIM1	ZSWIM1	ZSWIM1	0.770616641109083	7.87462518824516e-93	1.02184424476364
DAAM1	DAAM1	DAAM1	0.247500156149251	6.20173305820535e-08	0.252748081839854
NDC1	NDC1	NDC1	0.455657530180706	2.87351477028327e-25	0.491817199707048
C10orf32	C10orf32	C10orf32	0.431911123012093	1.33716257034408e-22	0.462243700304048
NUDT4	NUDT4	NUDT4	0.241162530172992	1.3643690599224e-07	0.246008063258017
POLR3B	POLR3B	POLR3B	0.431137536178288	1.62034557603949e-22	0.46129309878371
FIGN	FIGN	FIGN	0.271033505893254	2.73496298863724e-09	0.277978931585072
PINK1	PINK1	PINK1	0.392990826309195	1.16519322585037e-18	0.415332242042146
AGAP1	AGAP1	AGAP1	0.354039049617362	3.30680138592423e-15	0.370054119807494
ZNF865	ZNF865	ZNF865	0.437450680431662	3.33035126005971e-23	0.469073826675211
CENPL	CENPL	CENPL	0.648764983663454	5.18333166585634e-57	0.773163115130838
SRR	SRR	SRR	0.474614042603756	1.49053306844367e-27	0.516009209530344
FAM228B	FAM228B	FAM228B	0.277074633586988	1.16719933035568e-09	0.284510654803941
SNX17	SNX17	SNX17	0.469571542674208	6.23996356369977e-27	0.509520539855931
NUP88	NUP88	NUP88	0.556028292110128	3.59565534973316e-39	0.627065523864946
USP47	USP47	USP47	0.509232555341346	4.10687645473628e-32	0.561693089827138
COX6A1	COX6A1	COX6A1	0.452853117272425	6.0883172240993e-25	0.488283639309996
AC005255.3	AC005255.3	AC005255.3	-0.0270538504530836	0.560195930866343	-0.0270604536884429
SAAL1	SAAL1	SAAL1	0.457735965023005	1.639787504628e-25	0.494443384997806
TMEM87B	TMEM87B	TMEM87B	0.339654125177742	4.78430701509195e-14	0.353701496787318
PDE6D	PDE6D	PDE6D	0.242183535119811	1.20338835362487e-07	0.24709239993268
MXRA7	MXRA7	MXRA7	0.372104434957242	9.45949247097349e-17	0.390863534612928
TRAPPC12	TRAPPC12	TRAPPC12	0.481527183735413	2.01304959644106e-28	0.524970558494989
FLI1	FLI1	FLI1	0.185752609380101	5.477908682877e-05	0.187934362931112
HSPA12B	HSPA12B	HSPA12B	0.265234996854375	6.07336037598564e-09	0.271731213847105
RCAN1	RCAN1	RCAN1	0.191614603981673	3.12820230523021e-05	0.194012778232211
FAM174B	FAM174B	FAM174B	0.330006699962625	2.66097695077507e-13	0.342835773189099
ZNF333	ZNF333	ZNF333	0.459188851460457	1.10532762552237e-25	0.496282919849613
MICU2	MICU2	MICU2	0.576506716507536	1.25781270355265e-42	0.657214542461667
DPY19L3	DPY19L3	DPY19L3	0.345972803744744	1.50468948444967e-14	0.360861684839075
RNF219	RNF219	RNF219	0.669349562330058	7.34946515450463e-62	0.809563804061264
PTPRS	PTPRS	PTPRS	0.21857731977405	1.9027997284014e-06	0.222161559309107
AGL	AGL	AGL	0.412058236400755	1.58639036434732e-20	0.438087879808377
NAT9	NAT9	NAT9	0.552391274113712	1.39586111434149e-38	0.621816153749815
CDH5	CDH5	CDH5	0.0394239458142316	0.395830943778408	0.0394443897390264
KAZN	KAZN	KAZN	0.252671184392726	3.20689313586434e-08	0.258264113984309
HDLBP	HDLBP	HDLBP	0.547829891985601	7.47261419842053e-38	0.615275352508251
BACE2	BACE2	BACE2	0.338885018102894	5.49782360678947e-14	0.352832347189096
SEP15	SEP15	SEP15	0.527089919093209	1.1204456374269e-34	0.586106961484128
NSMCE1	NSMCE1	NSMCE1	0.496860801454605	2.00980599810027e-30	0.545129263305009
ISG20L2	ISG20L2	ISG20L2	0.731601484123181	3.16429350831714e-79	0.932164548543632
UVRAG	UVRAG	UVRAG	0.58112070982545	1.93588808893583e-43	0.66415319822752
DYRK2	DYRK2	DYRK2	0.861264939736602	1.64320903759374e-138	1.29822276881808
FAM167B	FAM167B	FAM167B	0.0280099999203082	0.546410757223869	0.0280173285465375
SLC25A39	SLC25A39	SLC25A39	0.326433550112398	4.94834349413676e-13	0.33883121183056
RPS3	RPS3	RPS3	0.695206158666964	1.56459964845766e-68	0.857962010971288
MON2	MON2	MON2	0.335259880080626	1.05316752765814e-13	0.348742525727632
FBXO31	FBXO31	FBXO31	0.519794294085524	1.30420747898729e-33	0.576057852878071
PATL1	PATL1	PATL1	0.526882851001898	1.20227322513965e-34	0.585820276874067
AAGAB	AAGAB	AAGAB	0.446237574192331	3.48220991150749e-24	0.479992463119521
NCAPD2	NCAPD2	NCAPD2	0.484309927483495	8.87633827044972e-29	0.5285996487824
H2AFY2	H2AFY2	H2AFY2	0.0644070743173524	0.165117235406433	0.0644963559792875
GADD45A	GADD45A	GADD45A	0.233275195980324	3.53145221582232e-07	0.237650364377366
LITAF	LITAF	LITAF	0.287365227951437	2.60716976222645e-10	0.295691950865853
PLEKHG3	PLEKHG3	PLEKHG3	0.343196641539398	2.50942401202117e-14	0.357711466961692
SHF	SHF	SHF	0.17529741840245	0.00014267807067344	0.177126851205524
SMUG1	SMUG1	SMUG1	0.430980951134297	1.68448687490246e-22	0.461100778264983
CTC1	CTC1	CTC1	0.318920200537062	1.77632638252438e-12	0.33044458590131
TAOK3	TAOK3	TAOK3	0.269141833520852	3.5554325191706e-09	0.275938407596449
RNPC3	RNPC3	RNPC3	0.494218501671164	4.52028483873396e-30	0.541626926624802
NASP	NASP	NASP	0.28059401541067	7.03902575848223e-10	0.288326736857516
C1QTNF1	C1QTNF1	C1QTNF1	0.109915273660835	0.0176171568185327	0.110361152514394
DDX59	DDX59	DDX59	0.561233146942888	5.01262502176762e-40	0.634631540610374
NOB1	NOB1	NOB1	0.589883927306896	5.09452520274179e-45	0.677488033547143
LEMD3	LEMD3	LEMD3	0.609646637934387	9.15234969160502e-49	0.708358784432396
BFAR	BFAR	BFAR	0.357253097771617	1.78612417578026e-15	0.373733564298026
TPI1P1	TPI1P1	TPI1P1	0.0395747686212571	0.394024653905679	0.0395954482276762
LGMN	LGMN	LGMN	0.224089908214606	1.02525945354215e-06	0.22795813121441
STEAP3	STEAP3	STEAP3	0.171723661742518	0.000195506407824703	0.173442159138409
TUBGCP3	TUBGCP3	TUBGCP3	0.686974026798078	2.47893345835415e-66	0.842202758882704
MACF1	MACF1	MACF1	0.37568170103772	4.55515251782983e-17	0.395022168503847
HS6ST1	HS6ST1	HS6ST1	0.208233021374739	5.81951170084663e-06	0.211323564382604
FAM192A	FAM192A	FAM192A	0.713622364804072	9.82345316301851e-74	0.894526704163452
C14orf159	C14orf159	C14orf159	0.290329774024947	1.67361184546627e-10	0.298926355893423
GCH1	GCH1	GCH1	0.0688807970035647	0.137622678185483	0.0689900446264408
TRPM7	TRPM7	TRPM7	0.577685640486661	7.81953252586477e-43	0.658982151600773
TMEM230	TMEM230	TMEM230	0.674182157446915	4.68765145424126e-63	0.818370800391949
SOS1	SOS1	SOS1	0.206525738837914	6.96180631611644e-06	0.209539557985626
FBXL12	FBXL12	FBXL12	0.458967970046671	1.17377832720185e-25	0.4960030563689
GDF11	GDF11	GDF11	0.474276730587649	1.64157977022276e-27	0.515573912925134
ZBTB41	ZBTB41	ZBTB41	0.392985310355628	1.16659601984612e-18	0.415325718612584
RP11.488L18.10	RP11.488L18.10	RP11.488L18.10	0.161884494776527	0.000450830156722617	0.163321302503094
MSI2	MSI2	MSI2	0.532201275715235	1.93646483964207e-35	0.593211297796138
RELT	RELT	RELT	0.538459073223519	2.16646370870784e-36	0.601982930292581
JOSD1	JOSD1	JOSD1	0.750774330192384	1.35251401179085e-85	0.974727326491609
ZNF697	ZNF697	ZNF697	0.733292470462672	9.13746547343201e-80	0.935812688932524
GTF2A1	GTF2A1	GTF2A1	0.298587520248174	4.73694540301265e-11	0.307968149845144
FAM210B	FAM210B	FAM210B	0.520188505396743	1.14394924024869e-33	0.576598157834205
TSFM	TSFM	TSFM	0.859280957737704	3.46651612283077e-137	1.29058990783952
OSCP1	OSCP1	OSCP1	0.359905545530377	1.06870459380606e-15	0.376777386964708
SP2	SP2	SP2	0.464141249294913	2.84048657362232e-26	0.502576785043957
MKKS	MKKS	MKKS	0.579452200030575	3.82185875815186e-43	0.661637604992467
IL10RB	IL10RB	IL10RB	0.369823141818474	1.50040769218572e-16	0.388218204832204
MYO1B	MYO1B	MYO1B	0.217665093010369	2.10461038897944e-06	0.221203763550363
EGR2	EGR2	EGR2	0.177916197542466	0.000112823972477626	0.179829941376085
TAF15	TAF15	TAF15	0.549189388040023	4.5444193711615e-38	0.617219887741719
ITPKB	ITPKB	ITPKB	0.338292204303031	6.11800565479039e-14	0.352162771723082
EML2	EML2	EML2	0.260053387673417	1.21924890234954e-08	0.266165666063142
ADCY6	ADCY6	ADCY6	0.1894603032312	3.85101755482456e-05	0.191777319217646
VAPB	VAPB	VAPB	0.600601418518481	5.10785341514095e-47	0.694087427411247
COQ9	COQ9	COQ9	0.565260832542988	1.06519356302152e-40	0.640530759521154
TOE1	TOE1	TOE1	0.567449868595608	4.54950234189027e-41	0.643753529911031
CSDE1	CSDE1	CSDE1	0.778845220394717	4.76426049878804e-96	1.04242843179149
MIEF1	MIEF1	MIEF1	0.678264977951173	4.39762715027055e-64	0.825893746824443
TEP1	TEP1	TEP1	0.392882482694257	1.1930531719018e-18	0.415204115842399
SMYD4	SMYD4	SMYD4	0.542967714945666	4.34444612973579e-37	0.608354447275706
ZNF542P	ZNF542P	ZNF542P	0.246919222607465	6.67259784305976e-08	0.25212933503102
NSRP1	NSRP1	NSRP1	0.468776136139205	7.80426042379673e-27	0.508500625481218
CSNK2A2	CSNK2A2	CSNK2A2	0.64239062632136	1.38271596927717e-55	0.762233451339599
STK4	STK4	STK4	0.249508275344487	4.80879550769324e-08	0.254888374303399
NDUFB1	NDUFB1	NDUFB1	0.332622416221868	1.68099498790387e-13	0.345774021519305
OLA1	OLA1	OLA1	0.456004211671764	2.61753715642524e-25	0.492254808300933
PPTC7	PPTC7	PPTC7	0.356335003253923	2.13124107077539e-15	0.372681545582616
MTHFD1	MTHFD1	MTHFD1	0.543820669704712	3.19689985662772e-37	0.60956478843937
EVI5L	EVI5L	EVI5L	0.0496623787471317	0.284689353078868	0.0497032675720579
GLTP	GLTP	GLTP	0.18223041574623	7.60797775589029e-05	0.184288750533101
YME1L1	YME1L1	YME1L1	0.575045435427929	2.26117510211321e-42	0.655028571207083
CFH	CFH	CFH	-0.0250190923577439	0.59007883955192	-0.0250243145943876
PPIF	PPIF	PPIF	0.327207747221681	4.3289675011855e-13	0.339697991214966
IFI44L	IFI44L	IFI44L	0.0886508181935387	0.0558332347487975	0.0888841540882623
NXF1	NXF1	NXF1	0.384540486250601	7.16943664648541e-18	0.405377209526524
SAFB2	SAFB2	SAFB2	0.285221402899888	3.58089952794884e-10	0.293356720064275
AARSD1	AARSD1	AARSD1	0.413853737170097	1.04335996960819e-20	0.440252524170413
MYO9A	MYO9A	MYO9A	0.36970071970144	1.53785510459854e-16	0.388076393753154
KIAA0930	KIAA0930	KIAA0930	0.479072129952321	4.12005806596925e-28	0.521779321982614
FAM73A	FAM73A	FAM73A	0.419529598141448	2.72845536336767e-21	0.447121007142444
KIAA1755	KIAA1755	KIAA1755	0.174673712522425	0.000150808667248137	0.176483444213284
AAR2	AAR2	AAR2	0.634806337772201	6.22314919072312e-54	0.749425917075078
SLC39A6	SLC39A6	SLC39A6	0.221024386114607	1.44886537180472e-06	0.224732852580831
CYGB	CYGB	CYGB	0.24076612561308	1.43230580755678e-07	0.245587223109968
FAM107B	FAM107B	FAM107B	0.206866970489401	6.71764023338491e-06	0.209896018855467
KTN1	KTN1	KTN1	0.23485240367424	2.92764735444642e-07	0.239318989567424
ERO1LB	ERO1LB	ERO1LB	0.181113781894322	8.43222378481172e-05	0.183134004436888
CBFA2T2	CBFA2T2	CBFA2T2	0.621790590583171	3.35757119249928e-51	0.727919042634939
MAD2L2	MAD2L2	MAD2L2	0.571248523730255	1.0238523561112e-41	0.649374189341951
IL34	IL34	IL34	0.500755353477641	6.00744263687974e-31	0.550313790064247
CYP1B1	CYP1B1	CYP1B1	-0.0190052085334937	0.682392037534789	-0.0190074972436501
MR1	MR1	MR1	0.167489985729542	0.000281684019700987	0.169083080518365
TMEM87A	TMEM87A	TMEM87A	0.545030006659722	2.06639165216808e-37	0.61128357142796
RNASEH1.AS1	RNASEH1.AS1	RNASEH1.AS1	0.37024307781744	1.37863750268023e-16	0.388704762510881
PER2	PER2	PER2	0.260752087013714	1.1108642770957e-08	0.266915190375857
SUCLG1	SUCLG1	SUCLG1	0.395102743258969	7.3385126281995e-19	0.417832361292207
SNTA1	SNTA1	SNTA1	0.192979345534243	2.73894582234066e-05	0.195429923412258
KIF20B	KIF20B	KIF20B	0.335912835945803	9.37394234638292e-14	0.34947834869279
RNLS	RNLS	RNLS	0.260158624938586	1.20229269940588e-08	0.266278539817478
TXNDC12	TXNDC12	TXNDC12	0.503967753530492	2.19273167152887e-31	0.554610563076577
UROD	UROD	UROD	0.499076884185834	1.01285969540182e-30	0.548076079622523
TRAF6	TRAF6	TRAF6	0.522454282043377	5.366470143723e-34	0.579709535584654
GPATCH1	GPATCH1	GPATCH1	0.518280765234968	2.15412234983305e-33	0.573986227172285
ZFP3	ZFP3	ZFP3	0.334397643777042	1.22771920881865e-13	0.34777141817457
DYNC1LI2	DYNC1LI2	DYNC1LI2	0.503123012792145	2.86111650363191e-31	0.553478873214827
RBM4B	RBM4B	RBM4B	0.550658643425202	2.64807993762629e-38	0.619326096187143
DYRK3	DYRK3	DYRK3	0.358426320138215	1.42399442663394e-15	0.375079079077871
FRS2	FRS2	FRS2	0.866064888849729	8.41591443832094e-142	1.31711585879336
SLC35E4	SLC35E4	SLC35E4	0.281525529268416	6.14978273290358e-10	0.289338146727154
ALG8	ALG8	ALG8	0.939389249668133	7.67847400020123e-218	1.73282805358742
CTDSPL2	CTDSPL2	CTDSPL2	0.449188432096787	1.60724378133457e-24	0.48368310404194
CEP89	CEP89	CEP89	0.517711818372002	2.59960274900334e-33	0.573208637190571
NABP2	NABP2	NABP2	0.533173771900819	1.38191284118649e-35	0.594569070370124
SLC4A3	SLC4A3	SLC4A3	0.332122705744279	1.83578480101873e-13	0.34521225142883
MYO9B	MYO9B	MYO9B	0.430455767354107	1.9184551349784e-22	0.460455970884127
DHX9	DHX9	DHX9	0.468392629735093	8.69123978238984e-27	0.508009220656315
STXBP6	STXBP6	STXBP6	0.218903550553279	1.83523379267552e-06	0.222504183774275
VPS4B	VPS4B	VPS4B	0.473672579416937	1.95086954588786e-27	0.514794712873933
ZBTB8OS	ZBTB8OS	ZBTB8OS	0.532359539631615	1.83314109104227e-35	0.59343212781053
CHST11	CHST11	CHST11	0.198117247114766	1.64698147656255e-05	0.200772119580646
GOLGA7B	GOLGA7B	GOLGA7B	0.353240871237949	3.84917658562903e-15	0.369141852029162
KLHL25	KLHL25	KLHL25	0.502431085030168	3.55584506951092e-31	0.552552864465648
THBS1	THBS1	THBS1	0.0517723890309826	0.264696697479507	0.0518187201281076
RNF6	RNF6	RNF6	0.511993434657963	1.68628110160307e-32	0.565427677620111
SC5D	SC5D	SC5D	0.423402973835765	1.07643546563541e-21	0.45183105822849
CTSK	CTSK	CTSK	0.246603356210121	6.9429167293993e-08	0.251792988083094
RPA1	RPA1	RPA1	0.539533843259856	1.48033988286664e-36	0.603497794914713
WDR62	WDR62	WDR62	0.281486469491439	6.18477006295847e-10	0.289295725232172
BCL2L1	BCL2L1	BCL2L1	0.145894893471364	0.00158914341108576	0.146943457649542
ELMO2	ELMO2	ELMO2	0.469321864722738	6.69429340696419e-27	0.509200283806183
C16orf87	C16orf87	C16orf87	0.443929665697782	6.3415110128586e-24	0.477114411753677
CPD	CPD	CPD	0.37126021011379	1.12251537718031e-16	0.389883987436668
DNAJB1	DNAJB1	DNAJB1	0.207798749375733	6.09181024603964e-06	0.210869651278942
XRCC6	XRCC6	XRCC6	0.806717843183521	4.53182614725185e-108	1.11755802906995
ANO1	ANO1	ANO1	0.106579540028197	0.0213851546203038	0.106985865676354
C11orf73	C11orf73	C11orf73	0.751221052826347	9.45864367538027e-86	0.975751914131865
PTCD3	PTCD3	PTCD3	0.355760799220236	2.37952242112395e-15	0.372023982130551
RPL18A	RPL18A	RPL18A	0.560207723059374	7.41051970550939e-40	0.633135864804807
CLPX	CLPX	CLPX	0.473403906019807	2.10629278887218e-27	0.514448377833715
HEXDC	HEXDC	HEXDC	0.346742492859706	1.30457794399404e-14	0.361736295479778
TYW3	TYW3	TYW3	0.442933413380974	8.2027455554356e-24	0.475874317628358
SYDE1	SYDE1	SYDE1	0.503772478191563	2.33198303626085e-31	0.554348840198193
PPP1R12C	PPP1R12C	PPP1R12C	0.492818110724366	6.92609794623545e-30	0.539775633424101
C12orf66	C12orf66	C12orf66	0.630747449839863	4.57047414206919e-53	0.742656459583729
EP300	EP300	EP300	0.591310578033321	2.78824736992828e-45	0.679678855260763
ULK2	ULK2	ULK2	0.427473578672277	3.99781588396054e-22	0.456801273696799
FBXO21	FBXO21	FBXO21	0.388029354546241	3.40767742186214e-18	0.409477986617257
CASP1	CASP1	CASP1	0.317472672229344	2.26305129325655e-12	0.328833985556184
MSH6	MSH6	MSH6	0.513979969775197	8.84259143504905e-33	0.568123683200588
TNFRSF19	TNFRSF19	TNFRSF19	0.181386085399017	8.22380146258182e-05	0.183415557391265
SPIRE1	SPIRE1	SPIRE1	0.403891167740442	1.03374543654927e-19	0.428289905434665
SETD4	SETD4	SETD4	0.514056339549564	8.62511702878744e-33	0.568227476753793
SMYD2	SMYD2	SMYD2	0.555399337242609	4.55160336767736e-39	0.626155553974222
SEPHS1	SEPHS1	SEPHS1	0.500630989602248	6.24513204566034e-31	0.550147818060633
EMC8	EMC8	EMC8	0.698113608269468	2.50917427767192e-69	0.863611255732429
EML4	EML4	EML4	0.336350888349228	8.66812882365994e-14	0.349972198551027
COL9A3	COL9A3	COL9A3	0.251716404216315	3.62618451838536e-08	0.25724448346491
RPA2	RPA2	RPA2	0.654105114222096	3.11345742471214e-58	0.782440247258633
SYT11	SYT11	SYT11	0.0800574369792367	0.0842875463427801	0.0802291322486629
NOL9	NOL9	NOL9	0.634169979896696	8.52375343898367e-54	0.748360748649557
PAPOLG	PAPOLG	PAPOLG	0.357035949866197	1.86243089139944e-15	0.373484669281405
COMMD9	COMMD9	COMMD9	0.546628799967945	1.15738879240917e-37	0.613560828708533
SRRM1	SRRM1	SRRM1	0.790915398303526	4.98761437213707e-101	1.07387160047624
CECR1	CECR1	CECR1	-0.081955645746792	0.0771609485163536	-0.0821398800463139
INO80	INO80	INO80	0.553810410711048	8.23862664314118e-39	0.623860786433954
PAK1	PAK1	PAK1	0.839113791114282	8.82666629775044e-125	1.21817088066155
YTHDF1	YTHDF1	YTHDF1	0.874095312880215	1.33042313492899e-147	1.35017807644968
TRIM63	TRIM63	TRIM63	0.197558785781982	1.74171532113272e-05	0.200190909746703
SNTB2	SNTB2	SNTB2	0.491310198398621	1.09417372479898e-29	0.537785968338281
ASB1	ASB1	ASB1	0.419129246327047	3.00171404876748e-21	0.446635239270962
PSKH1	PSKH1	PSKH1	0.561168219690453	5.13846044190915e-40	0.634536763742939
KLHL21	KLHL21	KLHL21	0.491915508043724	9.10926456159263e-30	0.53858419633285
CHSY1	CHSY1	CHSY1	0.473206081343722	2.22849557957599e-27	0.514193443337492
LRTOMT	LRTOMT	LRTOMT	0.601666724814772	3.20192744448904e-47	0.695755519661024
NFIC	NFIC	NFIC	0.41568811415748	6.78237465458247e-21	0.442468050127987
NDUFV2	NDUFV2	NDUFV2	0.481230007305971	2.19603809167677e-28	0.524583748339813
LIN52	LIN52	LIN52	0.369217135384984	1.69496817663054e-16	0.387516365637594
POLDIP3	POLDIP3	POLDIP3	0.862748952497513	1.62810373405052e-139	1.3039984473274
RIPK4	RIPK4	RIPK4	0.177566572626098	0.000116438614850856	0.179468910776879
PTER	PTER	PTER	0.350398312758718	6.58807198949462e-15	0.365897744102237
TAF12	TAF12	TAF12	0.469450853727	6.45563845199833e-27	0.50936572295142
MRPS7	MRPS7	MRPS7	0.703618716276335	7.37804824441111e-71	0.874431589100741
CBLN3	CBLN3	CBLN3	0.163951664847743	0.00037970696796323	0.165444836901588
C21orf91	C21orf91	C21orf91	0.473347948842943	2.14017122367275e-27	0.514376260191677
RP11.210M15.2	RP11.210M15.2	RP11.210M15.2	0.228552940062072	6.1424539144305e-07	0.232662117245152
SDCCAG8	SDCCAG8	SDCCAG8	0.307866267234913	1.09238646745466e-11	0.318186546113897
COG4	COG4	COG4	0.732610800844536	1.50933159087921e-79	0.934339705783598
SLC12A6	SLC12A6	SLC12A6	0.29232610880638	1.23807666062087e-10	0.301107838383366
MORC3	MORC3	MORC3	0.380571224900399	1.65316745690467e-17	0.400727450361918
TOM1L2	TOM1L2	TOM1L2	0.469607596015619	6.17692774980652e-27	0.509566792589451
RNF34	RNF34	RNF34	0.55515450914768	4.98839278432309e-39	0.625801586083293
TMEM133	TMEM133	TMEM133	0.16649856882054	0.000306451668923205	0.168063222649448
MAPRE2	MAPRE2	MAPRE2	0.341625811142367	3.34412280943494e-14	0.35593200181633
FBXO33	FBXO33	FBXO33	0.279960052823786	7.71445527702027e-10	0.287638727517517
FICD	FICD	FICD	0.287749711612526	2.4622259261071e-10	0.296111093112265
CEP170	CEP170	CEP170	0.43076216848161	1.77831999478767e-22	0.460832118922419
MAPKAPK2	MAPKAPK2	MAPKAPK2	0.339446361012572	4.96757252490065e-14	0.353466656905165
TXN2	TXN2	TXN2	0.681726138818993	5.73878141316694e-65	0.832331898828419
ATP6V1E2	ATP6V1E2	ATP6V1E2	0.336121816152881	9.03046720732924e-14	0.349713927555371
BEST1	BEST1	BEST1	0.133351031201352	0.00392893649030582	0.134150011532051
RP11.556K13.1	RP11.556K13.1	RP11.556K13.1	0.0671548170803811	0.14778096047895	0.067256042036929
MAPKBP1	MAPKBP1	MAPKBP1	0.552255035400537	1.46814039890072e-38	0.62162010965387
TBC1D8	TBC1D8	TBC1D8	0.20648562064491	6.9910622741677e-06	0.209497652761262
RPS6KA1	RPS6KA1	RPS6KA1	0.313762725751547	4.18466307435994e-12	0.32471357998904
DLG4	DLG4	DLG4	0.337461863960624	7.10331094145046e-14	0.351225422700181
POLG2	POLG2	POLG2	0.379382989766632	2.11823188273708e-17	0.39933870416488
SETD6	SETD6	SETD6	0.407574094601984	4.46799257293529e-20	0.432698595160351
KPNA6	KPNA6	KPNA6	0.720218127601789	1.06571223529146e-75	0.908098053859598
MARK3	MARK3	MARK3	0.492179424517689	8.40865402310765e-30	0.5389324219665
EBPL	EBPL	EBPL	0.374415870671217	5.90546276009875e-17	0.393549139159584
XRCC5	XRCC5	XRCC5	0.482250781868572	1.62815448491264e-28	0.525913009964025
C20orf196	C20orf196	C20orf196	0.413966206267646	1.016245756183e-20	0.44038824519252
TCFL5	TCFL5	TCFL5	0.629256093161931	9.43870861422151e-53	0.740183629435554
ALPL	ALPL	ALPL	0.0192488187946503	0.678546549798677	0.0192511966616549
RAB1A	RAB1A	RAB1A	0.432670161064479	1.10693164387709e-22	0.463177183254823
BTG1	BTG1	BTG1	0.287676270584839	2.48929186105808e-10	0.296031024067901
BRD7	BRD7	BRD7	0.637165421801373	1.92631628497162e-54	0.7533873005559
NLRP1	NLRP1	NLRP1	0.133309719493845	0.00394019737241221	0.134107952135101
MKL2	MKL2	MKL2	0.219083780592266	1.79889790784427e-06	0.222693492735752
SCYL2	SCYL2	SCYL2	0.293590720555135	1.02162696378312e-10	0.302491174718629
UCHL3	UCHL3	UCHL3	0.460588511383594	7.54556333576435e-26	0.4980580070562
C12orf5	C12orf5	C12orf5	0.387660349982767	3.6881334026888e-18	0.409043647122099
C2orf43	C2orf43	C2orf43	0.382031634970833	1.21729444443468e-17	0.40243631395415
SELENBP1	SELENBP1	SELENBP1	0.326230009465432	5.12508135761809e-13	0.338603412251601
PEX11A	PEX11A	PEX11A	0.494050173657936	4.75868552749112e-30	0.541404220811803
PECR	PECR	PECR	0.297155843490922	5.91286575598956e-11	0.306397075121425
EMC10	EMC10	EMC10	0.257693082034076	1.66648861750678e-08	0.263635820416011
RALB	RALB	RALB	0.410699057238785	2.17488292956178e-20	0.436451827073008
TCHP	TCHP	TCHP	0.487252248668932	3.70388834849315e-29	0.532450778297871
ECE1	ECE1	ECE1	0.305109199536624	1.6984556710211e-11	0.31514364123869
LMAN1	LMAN1	LMAN1	0.335907358177452	9.38311548638293e-14	0.349472174224664
SEPT9	SEPT9	SEPT9	0.534123050055461	9.93094428098478e-36	0.595896325263207
CENPB	CENPB	CENPB	0.441939174966565	1.059577409226e-23	0.474638087028269
USP12	USP12	USP12	0.42947679560908	2.44330551313862e-22	0.459254968427069
INHBB	INHBB	INHBB	0.0480870219358209	0.300263940684164	0.0481241383075863
PRPF31	PRPF31	PRPF31	0.60106738428528	4.16500494236952e-47	0.694816640638361
DHODH	DHODH	DHODH	0.53402050124564	1.02923238677583e-35	0.595752853668143
SREBF2	SREBF2	SREBF2	0.637647111029117	1.51423379115678e-54	0.754198616936537
S100A10	S100A10	S100A10	0.267768086214151	4.29620718735807e-09	0.274457967533184
ARHGEF7	ARHGEF7	ARHGEF7	0.664911308162426	8.79666720089842e-61	0.801565942043181
ARHGAP12	ARHGAP12	ARHGAP12	0.424086568032446	9.12338760040413e-22	0.452664262301903
SLC30A4	SLC30A4	SLC30A4	0.35788769808891	1.58028522457695e-15	0.374461197332196
FOXD2.AS1	FOXD2.AS1	FOXD2.AS1	0.33639670921176	8.59737978169861e-14	0.350023865377124
NEMF	NEMF	NEMF	0.364769920881742	4.11480265915272e-16	0.382376937346961
FAM208B	FAM208B	FAM208B	0.342131437963016	3.04942116272795e-14	0.356504548478589
C1orf21	C1orf21	C1orf21	0.375972859433361	4.29040880364611e-17	0.395361216064182
MTFMT	MTFMT	MTFMT	0.458241640146197	1.4297535483991e-25	0.495083280659459
ANPEP	ANPEP	ANPEP	-0.0429680436010557	0.354711648158068	-0.042994516222192
SERPINE2	SERPINE2	SERPINE2	0.282270241739032	5.51838253212868e-10	0.290147147653744
SNHG14	SNHG14	SNHG14	0.310699903576324	6.90676316043319e-12	0.32131991064049
HSP90B1	HSP90B1	HSP90B1	0.270848115090778	2.80644857959337e-09	0.277778853246535
IL15RA	IL15RA	IL15RA	0.14901080857804	0.00125493481798675	0.150128628643517
LINC01272	LINC01272	LINC01272	0.0405804210679941	0.382108321272942	0.0406027186513123
USP36	USP36	USP36	0.655335255710336	1.61573406226801e-58	0.784593324916978
ACTN1	ACTN1	ACTN1	0.352548021802049	4.39007751875146e-15	0.368350445082842
MYH14	MYH14	MYH14	0.241472257141033	1.31346022698731e-07	0.246336942193022
RNF2	RNF2	RNF2	0.608843251479561	1.31507811045363e-48	0.707081175700781
CDH11	CDH11	CDH11	0.0514714406770051	0.267487698610559	0.0515169676551718
RRNAD1	RRNAD1	RRNAD1	0.553354476800573	9.76208451111364e-39	0.62320339149868
RCCD1	RCCD1	RCCD1	0.6051487063439	6.87253782345926e-48	0.701231230469362
TRAPPC8	TRAPPC8	TRAPPC8	0.394166027990969	9.01247667312811e-19	0.416722855568912
VANGL2	VANGL2	VANGL2	0.579306254685211	4.0553853468429e-43	0.661417913563558
WDR59	WDR59	WDR59	0.624821947086961	7.96655081306202e-52	0.732876398342056
LPAR5	LPAR5	LPAR5	-0.0448369599210739	0.334152675402966	-0.0448670422536719
GGACT	GGACT	GGACT	0.484834767123817	7.59969003582664e-29	0.52928554368714
DFFB	DFFB	DFFB	0.482278278757921	1.61506207566881e-28	0.525948840221628
DOPEY2	DOPEY2	DOPEY2	0.305157702184201	1.68538665645779e-11	0.315197123420958
LAMP1	LAMP1	LAMP1	0.913166364298656	5.62288519491029e-183	1.54626043805358
RAB22A	RAB22A	RAB22A	0.490599918195881	1.3560991139077e-29	0.536850112216547
PPP1R15A	PPP1R15A	PPP1R15A	0.258632594100025	1.47212475478249e-08	0.264642420511618
NAT10	NAT10	NAT10	0.678575793787566	3.66687263696161e-64	0.8264696028447
PAFAH1B1	PAFAH1B1	PAFAH1B1	0.536537218750605	4.26594610726381e-36	0.599280260960894
CSNK1D	CSNK1D	CSNK1D	0.691544247221762	1.52090858233475e-67	0.850909370182549
PEX26	PEX26	PEX26	0.707016329860195	8.03346993508473e-72	0.88119270750252
MAP3K10	MAP3K10	MAP3K10	0.268772450887471	3.74143835643450e-09	0.275540220953946
HHLA3	HHLA3	HHLA3	0.244459297054775	9.07798770543268e-08	0.249511379620449
ABHD3	ABHD3	ABHD3	0.38196668941164	1.23401645889318e-17	0.40236027211412
VPS26B	VPS26B	VPS26B	0.750011829649126	2.48587780620369e-85	0.972982114274016
ATP9B	ATP9B	ATP9B	0.521934333555832	6.38765517503023e-34	0.578994646049047
CACNB3	CACNB3	CACNB3	0.315137037311106	3.33578432255995e-12	0.326238693142682
LACTB	LACTB	LACTB	0.191847581292377	3.05823848577526e-05	0.194254646830208
CALCOCO1	CALCOCO1	CALCOCO1	0.302812871019481	2.44438690611074e-11	0.312613550198922
PSMB2	PSMB2	PSMB2	0.675618324243396	2.04800467459361e-63	0.821008345433489
LINC01315	LINC01315	LINC01315	0.40991095697451	2.60976774338829e-20	0.435504192200788
RALGAPA2	RALGAPA2	RALGAPA2	0.411082945741593	1.98974563048767e-20	0.436913693077169
FAM219B	FAM219B	FAM219B	0.647798265057015	8.57217968115957e-57	0.771495584465047
MOCOS	MOCOS	MOCOS	0.11075143607609	0.0167689068379856	0.111207619403064
IGSF3	IGSF3	IGSF3	0.410727108676008	2.16079815642781e-20	0.43648557053392
NBL1	NBL1	NBL1	0.115107383684504	0.012903449219302	0.115619843672389
MED13L	MED13L	MED13L	0.542701438784081	4.78013932150345e-37	0.607976927628639
AP3M1	AP3M1	AP3M1	0.509037390899518	4.37225436816532e-32	0.561429632352858
BANP	BANP	BANP	0.27934473567969	8.43006924952719e-10	0.286971206560647
BCL2L13	BCL2L13	BCL2L13	0.633877561177493	9.84698848646328e-54	0.747871765446323
LGR4	LGR4	LGR4	0.243751562412619	9.91265583937107e-08	0.248758800670203
GJC1	GJC1	GJC1	0.31618822318871	2.80248101546793e-12	0.327406214371974
LPIN1	LPIN1	LPIN1	0.249091851617954	5.07019317755264e-08	0.254444354506765
CUL5	CUL5	CUL5	0.534356359666458	9.15491811387189e-36	0.596222820579625
MTA2	MTA2	MTA2	0.591256687684424	2.85261517525394e-45	0.679595995939691
BBIP1	BBIP1	BBIP1	0.446991168034975	2.86032996298148e-24	0.480933825287908
ADNP	ADNP	ADNP	0.541621207963838	7.03790110415999e-37	0.606446987489435
HIF1A	HIF1A	HIF1A	0.224529058188025	9.75310402211891e-07	0.228420547556844
KDELC2	KDELC2	KDELC2	0.461100457725075	6.55928751453878e-26	0.49870799669121
USP18	USP18	USP18	0.0703008148831698	0.129674784865246	0.0704169731947036
ZNF644	ZNF644	ZNF644	0.49386832539918	5.03022199728682e-30	0.541163682140339
INF2	INF2	INF2	0.45132032751653	9.15061664887956e-25	0.48635709755242
ETS2	ETS2	ETS2	0.171692837731976	0.00019603303897584	0.173410398712256
PIP4K2C	PIP4K2C	PIP4K2C	0.770829188377348	6.528310661478e-93	1.02236777804554
IFNAR2	IFNAR2	IFNAR2	0.311838733658837	5.73658634655684e-12	0.322580918156342
TFDP1	TFDP1	TFDP1	0.551431045840543	1.9914092823666e-38	0.620435312864722
RPS6KA4	RPS6KA4	RPS6KA4	0.355010023189172	2.74736929953531e-15	0.371164676813584
HTATIP2	HTATIP2	HTATIP2	0.221285107711229	1.40713908666517e-06	0.225006981674892
EVL	EVL	EVL	0.136683534514425	0.00311096840480904	0.137544396730549
PTPLA	PTPLA	PTPLA	0.47146117953663	3.65899206757834e-27	0.511947464554108
CYTH1	CYTH1	CYTH1	0.171556278830508	0.000198382182628875	0.173269695395907
C1orf35	C1orf35	C1orf35	0.666843051330421	3.00178037497849e-61	0.805036515837656
CLK2	CLK2	CLK2	0.593443883734973	1.12578855466687e-45	0.68296547532756
RPTOR	RPTOR	RPTOR	0.614940877117626	8.18074305087279e-50	0.716828368982379
EIF1	EIF1	EIF1	0.504625864980957	1.78131336922155e-31	0.555493123092771
ELAVL1	ELAVL1	ELAVL1	0.445723948585928	3.98075415931694e-24	0.479351313587051
LARP6	LARP6	LARP6	0.281368899775608	6.29125401270891e-10	0.289168042876749
NUMBL	NUMBL	NUMBL	0.297979179410765	5.20574184145559e-11	0.307300397037389
FBLIM1	FBLIM1	FBLIM1	0.0282395294447496	0.54312665270425	0.0282470397741201
HMGCL	HMGCL	HMGCL	0.795167957088743	7.31375198672938e-103	1.08533176274967
LPCAT2	LPCAT2	LPCAT2	0.245347862982158	8.12571547788641e-08	0.250456640244032
EFS	EFS	EFS	0.0665249895281459	0.151626791099013	0.0666233880356768
MBNL2	MBNL2	MBNL2	0.377703808143851	3.00165438835585e-17	0.397378656543978
C11orf30	C11orf30	C11orf30	0.679662749308508	1.93877223403795e-64	0.828486979276556
GOLPH3L	GOLPH3L	GOLPH3L	0.517149006203861	3.12976666349214e-33	0.572440047093427
GPC1	GPC1	GPC1	0.235275528885197	2.78338904400167e-07	0.239766862008947
ATP5G2	ATP5G2	ATP5G2	0.445419187397868	4.3092200116221e-24	0.478971058900811
MAPRE1	MAPRE1	MAPRE1	0.547829692063865	7.47315949635377e-38	0.61527506685783
VPS11	VPS11	VPS11	0.637974956449204	1.28510411087135e-54	0.754751292340334
OTUD1	OTUD1	OTUD1	0.410268815505146	2.40259405242465e-20	0.435934400460981
SDE2	SDE2	SDE2	0.603820896366467	1.23860834183156e-47	0.699138865331914
DHX33	DHX33	DHX33	0.407473261475217	4.57242782264291e-20	0.432577681177402
OSBPL9	OSBPL9	OSBPL9	0.36924370488316	1.68594061397327e-16	0.387547129160833
XPOT	XPOT	XPOT	0.519958220612332	1.235031872507e-33	0.576282493259096
C19orf24	C19orf24	C19orf24	0.26395603954943	7.22340003394536e-09	0.270355974723147
VIMP	VIMP	VIMP	0.526081059859459	1.57884329163003e-34	0.58471101744926
RAP2A	RAP2A	RAP2A	0.402373841570026	1.45609133066025e-19	0.426478137741168
PSMD14	PSMD14	PSMD14	0.417357485638865	4.57248192212388e-21	0.444487837976351
NAGK	NAGK	NAGK	0.214820647028266	2.87393595996443e-06	0.218219781227312
ZNF609	ZNF609	ZNF609	0.528142460551735	7.82454815158354e-35	0.587565540950474
RIMKLB	RIMKLB	RIMKLB	0.322894988424079	9.07405572434952e-13	0.334875706570712
SPTY2D1	SPTY2D1	SPTY2D1	0.438619614991983	2.47557375745957e-23	0.470520304112001
WDFY1	WDFY1	WDFY1	0.214512029535554	2.97199612654107e-06	0.217896255118918
PLCD4	PLCD4	PLCD4	0.0876719345026282	0.0586060783083863	0.0878976024139737
PLAU	PLAU	PLAU	0.115513325149139	0.0125868145555981	0.116031255470836
P2RX4	P2RX4	P2RX4	0.275939338678208	1.37193689491557e-09	0.28328137366096
CCDC59	CCDC59	CCDC59	0.583814219906843	6.40339911979839e-44	0.668229766375041
GOT1	GOT1	GOT1	0.450488470506868	1.14053778792477e-24	0.485312949741751
NAV2	NAV2	NAV2	0.306215733854171	1.42353042312074e-11	0.316364213214702
FBXO18	FBXO18	FBXO18	0.712374793679155	2.27833305800017e-73	0.891989094301156
LRRFIP1	LRRFIP1	LRRFIP1	0.368051947427738	2.14121834947951e-16	0.386167937627917
EPS8L2	EPS8L2	EPS8L2	0.0532710943147754	0.25109596280796	0.0533215713615563
SNRPF	SNRPF	SNRPF	0.42763923096097	3.83878118246744e-22	0.457003981965965
KMT2D	KMT2D	KMT2D	0.457632134165201	1.68654490562745e-25	0.494312040869243
TMEM9	TMEM9	TMEM9	0.642126314198266	1.58174351982883e-55	0.761783561454161
CFAP20	CFAP20	CFAP20	0.667368645653405	2.23730567221775e-61	0.805983584357635
CDC6	CDC6	CDC6	0.265753061062926	5.65989895086902e-09	0.272288564060667
AKR1A1	AKR1A1	AKR1A1	0.240060877942019	1.56131672230576e-07	0.244838712495891
ITPA	ITPA	ITPA	0.494047680048478	4.76230908658236e-30	0.541400922018569
NELFCD	NELFCD	NELFCD	0.66882841887331	9.85848228379346e-62	0.808620250287512
GBP3	GBP3	GBP3	0.182877399841156	7.16578815363489e-05	0.184958039325538
LINC01137	LINC01137	LINC01137	0.323247280143879	8.54550441741646e-13	0.335269053908234
ATP8B2	ATP8B2	ATP8B2	0.44089608808675	1.38476234573493e-23	0.473342568806618
PPP4R1	PPP4R1	PPP4R1	0.504273709819513	1.99092489012272e-31	0.555020767884552
SPPL3	SPPL3	SPPL3	0.515187437892212	5.9603507695242e-33	0.569766042656853
TALDO1	TALDO1	TALDO1	0.404972778895509	8.08898563059089e-20	0.429583026436987
ZFP90	ZFP90	ZFP90	0.589344838890077	6.39265548296127e-45	0.676661660515154
MIB1	MIB1	MIB1	0.412138564574415	1.55701270005773e-20	0.43818464034998
ZNF136	ZNF136	ZNF136	0.368922737748787	1.79823077233597e-16	0.387175543756686
SC22CB.1E7.1	SC22CB.1E7.1	SC22CB.1E7.1	0.0845438497314004	0.0682405595512447	0.0847461483221539
TMEM184B	TMEM184B	TMEM184B	0.729672258601474	1.29042780519846e-78	0.928026071874217
POU2F1	POU2F1	POU2F1	0.283975827771934	4.30063364641624e-10	0.292001365932029
ZNF844	ZNF844	ZNF844	0.166397213128996	0.000309095140531057	0.167958978894968
RFX5	RFX5	RFX5	0.219175461689735	1.78067965384679e-06	0.222789798209395
TOP3A	TOP3A	TOP3A	0.529128693258757	5.582830385206e-35	0.588934274026953
TSN	TSN	TSN	0.334469576799549	1.21213423696836e-13	0.347852409770145
SLX4IP	SLX4IP	SLX4IP	0.481020953674587	2.33452471010928e-28	0.524311726657077
C2orf76	C2orf76	C2orf76	0.32719484049443	4.33864248702383e-13	0.339683537010678
PRELP	PRELP	PRELP	0.104735754773965	0.0237540664449185	0.105121264321103
ST6GALNAC2	ST6GALNAC2	ST6GALNAC2	0.35656405481789	2.03945948208521e-15	0.372943935421798
VAMP4	VAMP4	VAMP4	0.167073990918875	0.000291839623982172	0.168655109680026
FOXN3	FOXN3	FOXN3	0.288807497596258	2.10276195551093e-10	0.297264753690217
ACOT7	ACOT7	ACOT7	0.471499946850093	3.6190149159795e-27	0.511997312838114
CLTC	CLTC	CLTC	0.550007219596297	3.3656244936907e-38	0.618391664309084
DSG2	DSG2	DSG2	0.169901562612095	0.000229023170419778	0.171565298355937
POLR1D	POLR1D	POLR1D	0.682808908311288	3.0173748010713e-65	0.834357620144488
BAZ2B	BAZ2B	BAZ2B	0.315773983857922	3.00186808463114e-12	0.326946028174383
RBL1	RBL1	RBL1	0.352653638099764	4.30305015133326e-15	0.368471056703316
LGALS8	LGALS8	LGALS8	0.347227407102384	1.19216425500968e-14	0.362287584091722
M6PR	M6PR	M6PR	0.488815579793923	2.31994491285237e-29	0.534502872122507
RNF185	RNF185	RNF185	0.732700694052771	1.4127990307658e-79	0.934533769233884
LTBP2	LTBP2	LTBP2	0.0658188218705722	0.156028592362153	0.0659141146377139
YWHAH	YWHAH	YWHAH	0.472920986823892	2.41702861668852e-27	0.513826153303481
PHF21A	PHF21A	PHF21A	0.496543591957084	2.21602937724121e-30	0.544708162800039
AMFR	AMFR	AMFR	0.517559920084854	2.73323149636663e-33	0.573001140921924
RECQL5	RECQL5	RECQL5	0.597680837568992	1.82141705749112e-46	0.689531335093706
FBXL15	FBXL15	FBXL15	0.449395444550328	1.52195890368953e-24	0.483942473697986
NUP85	NUP85	NUP85	0.64282429388398	1.10862305007815e-55	0.762972167686391
SEMA4A	SEMA4A	SEMA4A	-0.141943547851884	0.00213003032003906	-0.142908531961001
LGI4	LGI4	LGI4	0.136768170161106	0.00309237529628333	0.137630644693136
BBS2	BBS2	BBS2	0.43649643327314	4.23912533064403e-23	0.467894366216389
ZFPM1	ZFPM1	ZFPM1	0.245770309888413	7.70752672674104e-08	0.250906194978738
SYNM	SYNM	SYNM	0.236322678093254	2.45519667758351e-07	0.240875661969636
ALG5	ALG5	ALG5	0.652055604443654	9.22394835121893e-58	0.778866464127454
SNRPD3	SNRPD3	SNRPD3	0.664322130013936	1.21910000109261e-60	0.800510605288412
RIN2	RIN2	RIN2	0.194559926381301	2.34552696578142e-05	0.197072165374565
TM9SF3	TM9SF3	TM9SF3	0.474488417289175	1.54511030386393e-27	0.515847070743819
FOLR2	FOLR2	FOLR2	0.0190624127366017	0.68148830247871	0.0190647221785634
CASC3	CASC3	CASC3	0.518791601135937	1.81903292172066e-33	0.574684930230743
C17orf70	C17orf70	C17orf70	0.540924019562423	9.02714720596969e-37	0.605460898545661
COPA	COPA	COPA	0.668881593012925	9.5676904509482e-62	0.808716469915252
KDM2B	KDM2B	KDM2B	0.511439284590479	2.01746621115615e-32	0.564676945599322
PRRX1	PRRX1	PRRX1	-0.0506585077809222	0.275127398857035	-0.050701909341925
PTPRA	PTPRA	PTPRA	0.63349910352895	1.18663234636096e-53	0.747239357440277
RAB18	RAB18	RAB18	0.555016101858462	5.25344086135202e-39	0.62560154094632
GABPB2	GABPB2	GABPB2	0.208828416863828	5.46500190048037e-06	0.21194602775085
AC005702.1	AC005702.1	AC005702.1	0.457075313594211	1.96068467266325e-25	0.493607942240578
CREBBP	CREBBP	CREBBP	0.352371568379709	4.53934279514559e-15	0.36814896181499
PTPN11	PTPN11	PTPN11	0.357840620699502	1.594719877469e-15	0.374407205366895
IRS2	IRS2	IRS2	0.477286324082569	6.91170980513944e-28	0.519464134772589
EML3	EML3	EML3	0.484186938983887	9.20492158449192e-29	0.528438985235725
ZZZ3	ZZZ3	ZZZ3	0.466463630490964	1.49051282942695e-26	0.505540923977584
E2F7	E2F7	E2F7	0.102357840440748	0.0271417039867663	0.102717576612455
CTCF	CTCF	CTCF	0.417444873191246	4.47880462364245e-21	0.444593662710268
TMEM57	TMEM57	TMEM57	0.704744196641837	3.5518451122926e-71	0.876664118269621
KARS	KARS	KARS	0.657185902849351	5.98796010101068e-59	0.787843947068876
UBN1	UBN1	UBN1	0.416345439675734	5.80862476983123e-21	0.443262948774774
PHTF1	PHTF1	PHTF1	0.499123726836153	9.98240369158848e-31	0.548138461723868
PBXIP1	PBXIP1	PBXIP1	0.460050574680631	8.7398615225979e-26	0.497375437969188
RPS3AP6	RPS3AP6	RPS3AP6	0.0540607483601927	0.244128795808691	0.0541135062457061
ADCK1	ADCK1	ADCK1	0.511507777643032	1.97327892975723e-32	0.564769704987848
AMOTL1	AMOTL1	AMOTL1	0.350532257964661	6.42411837228923e-15	0.366050444927284
HERC4	HERC4	HERC4	0.475919663879891	1.02480741049746e-27	0.517695794818701
CHN1	CHN1	CHN1	0.133748731886912	0.00382201086430811	0.134554934251186
SEPT2	SEPT2	SEPT2	0.558959194552314	1.19062860925038e-39	0.631318147036294
ATE1	ATE1	ATE1	0.451748917906796	8.16698792850178e-25	0.486895448931015
TSPAN9	TSPAN9	TSPAN9	0.304539122539057	1.85967423468981e-11	0.314515167874121
SETD3	SETD3	SETD3	0.56795488018233	3.73538884531432e-41	0.644498699144908
KDM6B	KDM6B	KDM6B	0.308023984535933	1.06500239372835e-11	0.318360786683599
CD163	CD163	CD163	-0.0353420048474005	0.446586700544004	-0.0353567306147686
EHD3	EHD3	EHD3	0.220113381179299	1.60417481032312e-06	0.223775260085224
BST2	BST2	BST2	0.270114383257934	3.10758543648035e-09	0.276987204241733
C18orf21	C18orf21	C18orf21	0.436838483466595	3.88824627319046e-23	0.46831700442437
CCDC64	CCDC64	CCDC64	0.336789948735908	8.01301506160725e-14	0.350467349470969
ATXN7L3B	ATXN7L3B	ATXN7L3B	0.64463021376699	4.40097551934226e-56	0.766055972586601
NOP58	NOP58	NOP58	0.297131313501751	5.93530926414969e-11	0.306370169520921
ADAP2	ADAP2	ADAP2	0.0273026330035811	0.556593018485832	0.0273094201409971
TMEM147	TMEM147	TMEM147	0.386997763857867	4.24984913762187e-18	0.408264112151289
YPEL5	YPEL5	YPEL5	0.377448227872939	3.16465053707384e-17	0.39708058162165
DSTN	DSTN	DSTN	0.537601674387825	2.9326852363609e-36	0.600776215453333
SUPT6H	SUPT6H	SUPT6H	0.602859650361494	1.89399956975961e-47	0.697627425333622
SLC50A1	SLC50A1	SLC50A1	0.474112864970632	1.72032317260404e-27	0.515362511414001
CSNK1E	CSNK1E	CSNK1E	0.666242354070619	4.19714652018664e-61	0.803955582086917
IQGAP3	IQGAP3	IQGAP3	0.498431471317571	1.23722451541289e-30	0.547216954351011
HKR1	HKR1	HKR1	0.2933954406243	1.05246166547544e-10	0.302277488218897
EMP2	EMP2	EMP2	0.242240529769224	1.19496405353609e-07	0.247152946656711
TWSG1	TWSG1	TWSG1	0.293049767872736	1.1092812665347e-10	0.301899298938569
RAB6A	RAB6A	RAB6A	0.630271486725731	5.7632054460927e-53	0.741866423899583
TTC7A	TTC7A	TTC7A	0.145331436112089	0.0016576650898126	0.146367794373739
OBFC1	OBFC1	OBFC1	0.461300070313108	6.21024446349765e-26	0.498961539217314
C19orf66	C19orf66	C19orf66	0.297387324913308	5.70510775903652e-11	0.306650995598154
PYGO2	PYGO2	PYGO2	0.724285803921344	6.13141660845914e-77	0.916601704640113
INTS7	INTS7	INTS7	0.581827079150039	1.44980743950603e-43	0.665220401957168
TRIM45	TRIM45	TRIM45	0.628328768581242	1.47871620532952e-52	0.738649897741085
SUFU	SUFU	SUFU	0.394471319831909	8.42930541479011e-19	0.417084356130911
DAK	DAK	DAK	0.541231452665192	8.08929179379353e-37	0.605895595870471
GSE1	GSE1	GSE1	0.412065730979148	1.58362649535792e-20	0.438096907192095
PLEKHM1	PLEKHM1	PLEKHM1	0.519134014720714	1.62386834065633e-33	0.575153554962413
DGUOK	DGUOK	DGUOK	0.54522920030966	1.92275032873954e-37	0.611566986477771
ARPP19	ARPP19	ARPP19	0.532309910409038	1.86494005678985e-35	0.593362873197788
MESDC2	MESDC2	MESDC2	0.561648175268401	4.27739239226079e-40	0.635237612185446
HSPB8	HSPB8	HSPB8	0.202787543875846	1.02540910843833e-05	0.205637941031218
C12orf43	C12orf43	C12orf43	0.590287809571934	4.29663524935611e-45	0.678107676254884
SUN2	SUN2	SUN2	0.454058166364295	4.4131613032269e-25	0.489800611701577
LSR	LSR	LSR	0.0771326592342353	0.0962980815696021	0.0772861731608941
COX4I1	COX4I1	COX4I1	0.445748417054032	3.95548090096744e-24	0.479381848817478
UQCC1	UQCC1	UQCC1	0.572212202327279	6.99154142515853e-42	0.650805839917236
PSMF1	PSMF1	PSMF1	0.675604716441217	2.06418203541429e-63	0.820983310339435
PARP16	PARP16	PARP16	0.481950892685495	1.77793848207944e-28	0.525522314967874
AP3S2	AP3S2	AP3S2	0.672926707869679	9.63082863677382e-63	0.81607280524229
ASB16.AS1	ASB16.AS1	ASB16.AS1	0.47750816187097	6.48256193358512e-28	0.519751455231334
TMEM180	TMEM180	TMEM180	0.457999230575307	1.52689517845478e-25	0.494776481900472
ETAA1	ETAA1	ETAA1	0.234166286655843	3.17698513895084e-07	0.238592943898853
EPRS	EPRS	EPRS	0.496188066375351	2.4721128887215e-30	0.544236406293313
CNDP2	CNDP2	CNDP2	0.343069079202706	2.5687835961512e-14	0.357566881057189
APOL2	APOL2	APOL2	0.199828371498229	1.38625977634544e-05	0.20255378075504
NFIX	NFIX	NFIX	0.299644439256975	4.01850087993699e-11	0.309128923886695
LIMA1	LIMA1	LIMA1	0.158884777684916	0.000576296579159451	0.160242383102263
BATF	BATF	BATF	0.146854743019446	0.00147837388232032	0.147924322893555
MRPL39	MRPL39	MRPL39	0.366250095535277	3.06767989199165e-16	0.384085352628272
PLA2G6	PLA2G6	PLA2G6	0.415975587830677	6.33816380465997e-21	0.442815625129058
IGFBP2	IGFBP2	IGFBP2	0.193170370141908	2.68827276512561e-05	0.19562834475161
GAS5.AS1	GAS5.AS1	GAS5.AS1	0.268236605128237	4.02814720525827e-09	0.274962742016496
CTSF	CTSF	CTSF	0.50499251566142	1.58627063023466e-31	0.55598516092893
RAMP1	RAMP1	RAMP1	0.00245025844817867	0.957929640895147	0.00245026335178953
RP11.347E10.1	RP11.347E10.1	RP11.347E10.1	0.163618596431529	0.000390411285667363	0.165102587445454
POC1B	POC1B	POC1B	0.120023130666551	0.00950416508109311	0.120604497089143
ZNF646	ZNF646	ZNF646	0.474907067575855	1.3705261118986e-27	0.516387500344002
MTIF2	MTIF2	MTIF2	0.423158136917887	1.14202479033724e-21	0.451532779832981
HPS1	HPS1	HPS1	0.457072620143363	1.96211230836864e-25	0.493604537478342
CABLES1	CABLES1	CABLES1	0.362002448493439	7.09645623368678e-16	0.379188419426773
CLSTN3	CLSTN3	CLSTN3	0.207778242141709	6.10496467307401e-06	0.210848218669299
PTPRM	PTPRM	PTPRM	0.400876604963067	2.03820172263058e-19	0.42469294371328
MACROD1	MACROD1	MACROD1	0.284566320039484	3.94342512644219e-10	0.292643771006821
MCU	MCU	MCU	0.4180206722791	3.90716452180026e-21	0.445291178870594
NOL11	NOL11	NOL11	0.566589051931504	6.36181940726749e-41	0.642484803406071
ZFAS1	ZFAS1	ZFAS1	0.373657171772553	6.8959918419549e-17	0.392667030222936
OLFM2	OLFM2	OLFM2	0.102057439486872	0.0275979013516138	0.102414004419133
MIER1	MIER1	MIER1	0.393746098698304	9.87998805997652e-19	0.416225779348238
AMIGO1	AMIGO1	AMIGO1	0.249272652804675	4.95505685369579e-08	0.254637125170659
KIAA1549L	KIAA1549L	KIAA1549L	0.2763186389162	1.2999295722151e-09	0.283691981620273
GTF2H3	GTF2H3	GTF2H3	0.486279738252466	4.94907964043974e-29	0.531176288631401
KCNJ10	KCNJ10	KCNJ10	0.0247606722689652	0.593925833907234	0.0247657343120674
SBF2	SBF2	SBF2	0.463442820324563	3.44507089028535e-26	0.501686949699895
MTMR11	MTMR11	MTMR11	0.110025680830774	0.0175030472851196	0.110472911239246
EMR2	EMR2	EMR2	0.0417201283610511	0.368873070086621	0.0417443592603255
CEP192	CEP192	CEP192	0.450860166039157	1.03371087504021e-24	0.485779380871472
LUZP1	LUZP1	LUZP1	0.790099713783136	1.10852353481035e-100	1.07169700644747
AKAP10	AKAP10	AKAP10	0.523854336689635	3.35219440856447e-34	0.581637164651207
PREB	PREB	PREB	0.639545819767426	5.83875164097504e-55	0.757404847626697
ZNF33B	ZNF33B	ZNF33B	0.299500368163423	4.10978007561116e-11	0.308970648594259
CD8A	CD8A	CD8A	-0.0375035329625604	0.419263387278558	-0.0375211309097119
MORN2	MORN2	MORN2	0.42494259752912	7.41264716400064e-22	0.45370847162846
C10orf11	C10orf11	C10orf11	0.281183280479144	6.46301021138491e-10	0.28896647639781
ZNF33A	ZNF33A	ZNF33A	0.36202672234686	7.06277611402673e-16	0.379216354268602
PLBD1	PLBD1	PLBD1	0.0480925978786789	0.300207834985324	0.0481297271754267
DRG1	DRG1	DRG1	0.71790333369093	5.29100356396513e-75	0.903305016831279
RABGGTA	RABGGTA	RABGGTA	0.440866345281768	1.39535245868491e-23	0.473305649829385
RBBP6	RBBP6	RBBP6	0.264569187846983	6.64791805513083e-09	0.271015156852949
PGF	PGF	PGF	0.111406843756098	0.0161292264467819	0.111871214931425
RAC2	RAC2	RAC2	-0.0203827234216728	0.660758345370185	-0.0203855468297727
NIT1	NIT1	NIT1	0.638754523092696	8.69276149998736e-55	0.756067038242371
ACTN4	ACTN4	ACTN4	0.315647948554977	3.06523781732579e-12	0.326806039746631
UNKL	UNKL	UNKL	0.370547109694129	1.29659112690304e-16	0.389057137623646
STX5	STX5	STX5	0.608605843000405	1.46347149022069e-48	0.706704010213579
SLC37A1	SLC37A1	SLC37A1	0.220575385558721	1.52351842017443e-06	0.22426084018897
USP1	USP1	USP1	0.446982743236703	2.86663550890335e-24	0.480923296957176
PIK3C2B	PIK3C2B	PIK3C2B	0.105097222126549	0.0232725353391201	0.105486754803196
POLE2	POLE2	POLE2	0.30643962580805	1.37344339202118e-11	0.316611290030051
TNFAIP8L2	TNFAIP8L2	TNFAIP8L2	-0.254432557405899	2.55308065610592e-08	-0.260146503727337
HIBCH	HIBCH	HIBCH	0.189620107294892	3.79238954027307e-05	0.191943078256332
CARD16	CARD16	CARD16	0.229339806548519	5.60585974797764e-07	0.233492510018438
ZC3H13	ZC3H13	ZC3H13	0.454838182830081	3.58092882690015e-25	0.490783648019556
SLC8B1	SLC8B1	SLC8B1	0.27310649920115	2.04679435540962e-09	0.280217639803967
ID1	ID1	ID1	0.102605865116237	0.0267699506247403	0.102968233824206
PTTG1IP	PTTG1IP	PTTG1IP	0.418079056629507	3.85338515544598e-21	0.44536192768663
CADM1	CADM1	CADM1	0.237115209474993	2.23191778194366e-07	0.241715239874291
CMPK1	CMPK1	CMPK1	0.4693443433467	6.65208514533297e-27	0.509229112665748
ARFGAP3	ARFGAP3	ARFGAP3	0.533908974311151	1.07001369278661e-35	0.595596846119852
FAM76A	FAM76A	FAM76A	0.547620056292522	8.06720118792378e-38	0.614975586094487
MRPL52	MRPL52	MRPL52	0.49381395719114	5.11434127532013e-30	0.541091778022721
PLA2G4C	PLA2G4C	PLA2G4C	0.0605088700929778	0.192269772914279	0.0605828802594124
KIAA0195	KIAA0195	KIAA0195	0.60763915987421	2.25967159334652e-48	0.705170047294018
CDH2	CDH2	CDH2	0.0812735127724738	0.0796634125029212	0.0814531729300657
TSPAN18	TSPAN18	TSPAN18	0.0727984863410394	0.116562780353114	0.0729274982472784
MANBAL	MANBAL	MANBAL	0.52627676159721	1.47735425734979e-34	0.584981646772842
RFFL	RFFL	RFFL	0.209767777293449	4.94725963280259e-06	0.212928422760581
TEAD4	TEAD4	TEAD4	0.383178472449354	9.561930169631e-18	0.403779823513894
AGO1	AGO1	AGO1	0.538236041381947	2.34421788315969e-36	0.601668881395208
TMED2	TMED2	TMED2	0.710636965484062	7.29961497848969e-73	0.888469499996189
TGDS	TGDS	TGDS	0.520344902431625	1.08591566301217e-33	0.576812599351898
COPS8	COPS8	COPS8	0.453835987639264	4.68335762277386e-25	0.489520765678206
KHNYN	KHNYN	KHNYN	0.536843440967034	3.83049479691824e-36	0.599710370411169
TGM2	TGM2	TGM2	-0.0433154415845423	0.350831057127217	-0.0433425619954628
XPO6	XPO6	XPO6	0.375746592777702	4.49479109092163e-17	0.395097726028723
CTDSP2	CTDSP2	CTDSP2	0.787063382334258	2.1009613178703e-99	1.06366721565893
RHOJ	RHOJ	RHOJ	0.296159311176146	6.89468149197672e-11	0.305304379191216
RAB3A	RAB3A	RAB3A	0.249685704080737	4.70141991704817e-08	0.255077590985507
HOOK2	HOOK2	HOOK2	0.387648069181586	3.69784763570077e-18	0.40902919443147
RBM43	RBM43	RBM43	0.224612863369673	9.66047493108881e-07	0.228508803681719
KLHL26	KLHL26	KLHL26	0.329496354218292	2.90896265642031e-13	0.342263164172366
NIPSNAP1	NIPSNAP1	NIPSNAP1	0.527689168866317	9.13440680263652e-35	0.586937108067969
TMEM134	TMEM134	TMEM134	0.635070172627251	5.46101146575116e-54	0.749867960061178
OTUD7B	OTUD7B	OTUD7B	0.549984919070501	3.39333319586334e-38	0.618359692427275
ZSWIM7	ZSWIM7	ZSWIM7	0.572943334602681	5.23021728552156e-42	0.65189358418119
PEAK1	PEAK1	PEAK1	0.759283371906199	1.30220557858599e-88	0.994520702711677
FAM111B	FAM111B	FAM111B	0.269833520216525	3.23096604396285e-09	0.276684260888251
PDS5B	PDS5B	PDS5B	0.497088740591716	1.87345704207806e-30	0.545431964863599
PIK3CD	PIK3CD	PIK3CD	0.339482078552943	4.93558418766185e-14	0.353507026471086
FHL2	FHL2	FHL2	0.247884869537806	5.90774964901361e-08	0.253157940725365
C15orf41	C15orf41	C15orf41	0.381139360999042	1.46786651166171e-17	0.401391976509427
DPYSL4	DPYSL4	DPYSL4	0.0659541994044652	0.155177331527053	0.0660500824123174
NCOA5	NCOA5	NCOA5	0.61065447561102	5.79981892657354e-49	0.709964347547512
ITGA4	ITGA4	ITGA4	0.178624585075885	0.000105821232219451	0.180561580684549
VPS18	VPS18	VPS18	0.390283838979564	2.09729635202461e-18	0.412134833454371
DYRK1A	DYRK1A	DYRK1A	0.473095258600671	2.29999012509781e-27	0.514050654158338
PPP1R13L	PPP1R13L	PPP1R13L	0.0623291514509285	0.179209136553884	0.062410054770583
FAM118A	FAM118A	FAM118A	0.356019851179713	2.26418056325033e-15	0.372320603545104
SLC38A7	SLC38A7	SLC38A7	0.530380063665286	3.63196633476656e-35	0.590673834842828
DNAL1	DNAL1	DNAL1	0.311871123310489	5.70631197893803e-12	0.322616797167259
DMXL2	DMXL2	DMXL2	0.427349789911627	4.12088571817607e-22	0.456649816649025
BRMS1L	BRMS1L	BRMS1L	0.338143510819562	6.2840178433959e-14	0.351994871964241
UEVLD	UEVLD	UEVLD	0.467780888111923	1.03164850107451e-26	0.507225835127441
IRS1	IRS1	IRS1	0.204346922961822	8.73208654844275e-06	0.20726473419184
C1orf198	C1orf198	C1orf198	0.323281525499335	8.49576132900736e-13	0.335307295505831
TMPRSS5	TMPRSS5	TMPRSS5	0.191359480819732	3.20655455358734e-05	0.193747944327724
REV1	REV1	REV1	0.291334522514924	1.43845873116126e-10	0.300023942007661
SCARB1	SCARB1	SCARB1	0.572386752793	6.52390611241467e-42	0.651065404818313
ALOX5AP	ALOX5AP	ALOX5AP	-0.121366424185898	0.00872601759390382	-0.121967648159801
MAPK6	MAPK6	MAPK6	0.684492888637624	1.1040808347474e-65	0.8375193097444
PPDPF	PPDPF	PPDPF	0.312228025075151	5.3828838073072e-12	0.323012201400094
TLE2	TLE2	TLE2	0.0700481931891521	0.131062128522711	0.0701631013171447
SNRNP40	SNRNP40	SNRNP40	0.662855711864517	2.73762170697154e-60	0.797890359121092
PAK4	PAK4	PAK4	0.299574845336314	4.06234391356598e-11	0.3090524667164
RAB12	RAB12	RAB12	0.497974972661804	1.4249527514581e-30	0.546609741532437
LSM14A	LSM14A	LSM14A	0.538890371153347	1.85974338597176e-36	0.602590538074605
COPZ2	COPZ2	COPZ2	0.179254038337293	9.99438106572826e-05	0.181211855293269
NMT1	NMT1	NMT1	0.729351369830183	1.62839449838078e-78	0.927340137242077
ARHGAP32	ARHGAP32	ARHGAP32	0.437778386392276	3.06498186998575e-23	0.469479155795992
RAB4A	RAB4A	RAB4A	0.56194966051456	3.81134117872473e-40	0.635678134096144
ANP32E	ANP32E	ANP32E	0.443295405267086	7.47121318996626e-24	0.476324752602401
EPS15	EPS15	EPS15	0.373307485769293	7.40586172861924e-17	0.392260660019225
SAP130	SAP130	SAP130	0.465588033010428	1.90184992568058e-26	0.504422406673288
ARHGEF1	ARHGEF1	ARHGEF1	0.211561524775341	4.08580965264033e-06	0.214805473595468
ZBTB40	ZBTB40	ZBTB40	0.513044934868989	1.19885422157557e-32	0.566853781216488
ALDH16A1	ALDH16A1	ALDH16A1	0.331560885336783	2.02650985320294e-13	0.344580908116668
XYLT2	XYLT2	XYLT2	0.588599204987199	8.74426161903219e-45	0.675519997038121
CCSAP	CCSAP	CCSAP	0.265002584918354	6.26822437598098e-09	0.27148123113116
FZD2	FZD2	FZD2	0.11354677523174	0.0141870849531128	0.114038566512202
IKZF5	IKZF5	IKZF5	0.449723664077881	1.39581147686901e-24	0.484353829876969
SLC41A2	SLC41A2	SLC41A2	0.217911072785731	2.04826138075362e-06	0.221461991505007
DISP1	DISP1	DISP1	0.217677391977775	2.10175804268772e-06	0.221216674235993
UCN	UCN	UCN	0.168703463284827	0.000253913596246852	0.17033184393929
CYLD	CYLD	CYLD	0.299662255646427	4.00735124982274e-11	0.309148497865357
TAF3	TAF3	TAF3	0.490998202950841	1.20241435551374e-29	0.537374781203458
RLBP1	RLBP1	RLBP1	0.296701345236321	6.34246183727273e-11	0.305898630710867
POMP	POMP	POMP	0.476682832539765	8.22651488199425e-28	0.518682901430624
RPAP2	RPAP2	RPAP2	0.520292929034915	1.10487031578131e-33	0.576741331476921
PIAS1	PIAS1	PIAS1	0.484533515286096	8.30842565701609e-29	0.528891792263669
ADPRM	ADPRM	ADPRM	0.398280492022436	3.6370906815538e-19	0.421603568801546
ADRBK1	ADRBK1	ADRBK1	0.455030328181484	3.40097838886823e-25	0.491025939211964
RARA	RARA	RARA	0.285321764696279	3.52830473913131e-10	0.293465972838028
GINS3	GINS3	GINS3	0.331170287700035	2.17040713704224e-13	0.344142131405736
MAF	MAF	MAF	0.227044609855068	7.31214424060128e-07	0.231071232005204
PIK3AP1	PIK3AP1	PIK3AP1	0.204785102549104	8.34476099498643e-06	0.207722051250641
ENOX1	ENOX1	ENOX1	0.26635365051357	5.21468965696118e-09	0.272934904337689
ACIN1	ACIN1	ACIN1	0.431494972004718	1.48282031579201e-22	0.461732227332679
ZFP64	ZFP64	ZFP64	0.690446708163203	2.98719202757384e-67	0.848808916586301
ZNF317	ZNF317	ZNF317	0.589966755112013	4.91973180448732e-45	0.677615072378659
DACT1	DACT1	DACT1	0.13902600796034	0.00263217566939317	0.139932249967715
TMEM117	TMEM117	TMEM117	0.64737018083448	1.07049955615236e-56	0.770758314912695
TAF1C	TAF1C	TAF1C	0.397128957455837	4.69467710958647e-19	0.420235675605496
APPL2	APPL2	APPL2	0.278579410775552	9.4105877223131e-10	0.286141298273628
AAK1	AAK1	AAK1	0.377228976000085	3.31139055633019e-17	0.396824928762954
HPS5	HPS5	HPS5	0.252596671510824	3.23785247835901e-08	0.258184521178989
RP11.35G9.5	RP11.35G9.5	RP11.35G9.5	0.394792250788255	7.85630989789039e-19	0.417464486392604
MARK2	MARK2	MARK2	0.634107469894301	8.79091307211851e-54	0.748256193807338
APIP	APIP	APIP	0.493281534594318	6.0152741671922e-30	0.540387897591889
SNRNP35	SNRNP35	SNRNP35	0.577414896581532	8.72295144585816e-43	0.658575894976568
C1R	C1R	C1R	0.0147579652206704	0.750680368257701	0.0147590367768643
ZC3H6	ZC3H6	ZC3H6	0.140626181142043	0.00234479812171904	0.141564332928976
Z98750.1	Z98750.1	Z98750.1	0.171275042393638	0.000203303426491264	0.172979945129578
KIAA0556	KIAA0556	KIAA0556	0.17717116905359	0.000120657624723572	0.179060663866358
FAM177A1	FAM177A1	FAM177A1	0.410443885187738	2.30723230637547e-20	0.436144920025409
SLC19A2	SLC19A2	SLC19A2	0.41571646511369	6.73723616579308e-21	0.442502323875441
PSMA1	PSMA1	PSMA1	0.666949254339037	2.828823901586e-61	0.805227786618254
UBA2	UBA2	UBA2	0.459278744628669	1.07861274326785e-25	0.496396837827549
ZNF720	ZNF720	ZNF720	0.328349405882855	3.55174687558682e-13	0.340977073098555
PDIA6	PDIA6	PDIA6	0.392548894323971	1.28301607287659e-18	0.41480969815685
ASH1L	ASH1L	ASH1L	0.464462187240633	2.59907146197612e-26	0.502985923453936
ULK1	ULK1	ULK1	0.377595915677605	3.06943045207862e-17	0.397252816900838
USP31	USP31	USP31	0.215764445067036	2.59288808669533e-06	0.21920945143945
RPL13P12	RPL13P12	RPL13P12	-0.00542196376661924	0.907073523449311	-0.00542201689862844
NOP56	NOP56	NOP56	0.55907825467735	1.13808991742359e-39	0.631491325888107
EIF5A	EIF5A	EIF5A	0.486284999196611	4.94133880260583e-29	0.53118317892763
UBE2V1	UBE2V1	UBE2V1	0.740156865982393	5.34410656527512e-82	0.950826211385842
UBL3	UBL3	UBL3	0.486212892450533	5.04848554773417e-29	0.531088744225938
SNN	SNN	SNN	0.293491079720487	1.03724861228485e-10	0.302382138653953
FAM69A	FAM69A	FAM69A	0.351719938709442	5.13497598714747e-15	0.367405146443501
VWA5A	VWA5A	VWA5A	0.270947379751908	2.76795011509865e-09	0.277885979425589
FAM168B	FAM168B	FAM168B	0.516966362433786	3.32382057376885e-33	0.572190755569556
GALNT3	GALNT3	GALNT3	0.125029869542483	0.00688436170217088	0.125687557917759
ATG13	ATG13	ATG13	0.692736745053439	7.27923626220546e-68	0.853198492903363
RP11.832N8.1	RP11.832N8.1	RP11.832N8.1	0.12257432949937	0.00807530277922847	0.123193794735419
PKNOX1	PKNOX1	PKNOX1	0.356498540706211	2.06530745634163e-15	0.372868880770647
EIF2AK3	EIF2AK3	EIF2AK3	0.349825103755867	7.33731082340538e-15	0.365244456212502
PALB2	PALB2	PALB2	0.340273585600715	4.27633661462705e-14	0.354401907509912
SPPL2B	SPPL2B	SPPL2B	0.392157569908795	1.39708575573875e-18	0.414347171958857
CCAR1	CCAR1	CCAR1	0.226717560980281	7.59260111559699e-07	0.230726434674813
NDEL1	NDEL1	NDEL1	0.402491962143436	1.41786271640064e-19	0.426619085046809
BRI3BP	BRI3BP	BRI3BP	0.343628738511408	2.31817489876782e-14	0.358201335224401
HLCS	HLCS	HLCS	0.469455771966252	6.44670712487539e-27	0.509372031511627
AP3D1	AP3D1	AP3D1	0.412148277996521	1.55349684249259e-20	0.438196341325533
NDUFA12	NDUFA12	NDUFA12	0.519295992560771	1.53891600141216e-33	0.575375316109548
RABEP1	RABEP1	RABEP1	0.592808887350017	1.47571972828699e-45	0.681985846477234
PCF11	PCF11	PCF11	0.344046507257325	2.14688673820557e-14	0.358675116438459
RBM14	RBM14	RBM14	0.147679124990548	0.00138894701027269	0.148766980086491
SSH2	SSH2	SSH2	0.4219576006983	1.52520579432045e-21	0.450071286037764
GLYR1	GLYR1	GLYR1	0.537010696648586	3.61155733330695e-36	0.599945376020388
VPS13C	VPS13C	VPS13C	0.279209330426876	8.59599803589493e-10	0.286824346890453
SLC26A11	SLC26A11	SLC26A11	0.580618002327463	2.37716405662128e-43	0.663394498358446
USP16	USP16	USP16	0.400307402154591	2.31515525574663e-19	0.424014938732939
SH3BP1	SH3BP1	SH3BP1	0.35700599282555	1.87320601928996e-15	0.373450335981968
ZADH2	ZADH2	ZADH2	0.40538556834456	7.36442624367355e-20	0.430076894259323
ZNF436	ZNF436	ZNF436	0.744738528893195	1.57660099946274e-83	0.961035793262744
OSBPL2	OSBPL2	OSBPL2	0.724665093489187	4.68591127405131e-77	0.917399981679018
SIK2	SIK2	SIK2	0.514359796485612	7.81206880140037e-33	0.568640012157842
C1RL	C1RL	C1RL	0.0875577021935632	0.0589369622182644	0.0877824864334867
PDCD5	PDCD5	PDCD5	0.373260149216744	7.47766977018383e-17	0.392205659674108
KLF6	KLF6	KLF6	0.328393566894349	3.52460449478564e-13	0.341026571405207
LARP4	LARP4	LARP4	0.381732504546329	1.29621139129725e-17	0.402086112237853
KCNK2	KCNK2	KCNK2	0.172803944735261	0.000177865097449108	0.174555479841812
PUM1	PUM1	PUM1	0.377172580343557	3.35020399547726e-17	0.396759178069679
GOLGA5	GOLGA5	GOLGA5	0.420026466471629	2.42322514494178e-21	0.447724159065127
PSD4	PSD4	PSD4	0.00943782686625218	0.838984940020256	0.00943810709841241
COL6A3	COL6A3	COL6A3	0.0089587040926097	0.847055833450925	0.00895894377450796
NAP1L1	NAP1L1	NAP1L1	0.362457030934978	6.49112736851842e-16	0.379711655947785
NUDT15	NUDT15	NUDT15	0.620052820003029	7.60493720638445e-51	0.725090894791989
AES	AES	AES	0.313639420329013	4.27041328242094e-12	0.324576815829133
GATAD2A	GATAD2A	GATAD2A	0.473887800574352	1.83459229386823e-27	0.515072226977429
FBXO11	FBXO11	FBXO11	0.385134964742289	6.31998819208217e-18	0.406075036241918
TNS1	TNS1	TNS1	0.106972957565721	0.0209071127187446	0.107383820367259
LMO4	LMO4	LMO4	0.223093159803734	1.1478980394106e-06	0.226908929788874
COA4	COA4	COA4	0.826272127424146	9.63407846170532e-118	1.17627097752756
RPL21P28	RPL21P28	RPL21P28	-0.00459766499900371	0.921151043504943	-0.00459769739536433
RP11.291L22.7	RP11.291L22.7	RP11.291L22.7	0.290938512213072	1.5270238430235e-10	0.299591257123132
SCYL3	SCYL3	SCYL3	0.482765156196306	1.39974916305634e-28	0.526583478820799
RP11.104E19.1	RP11.104E19.1	RP11.104E19.1	0.186651220508423	5.03262571711086e-05	0.188865249025394
CTSA	CTSA	CTSA	0.379006042813691	2.29104526473805e-17	0.39889845435117
GCC2	GCC2	GCC2	0.294003354553918	9.59339591976735e-11	0.302942790729653
MANSC1	MANSC1	MANSC1	0.194784809113867	2.29411353261848e-05	0.197305906264075
ACSF2	ACSF2	ACSF2	0.134464222083705	0.00363625888829532	0.135283527908332
DERA	DERA	DERA	0.425266578150049	6.85132664863791e-22	0.45410391423591
MED17	MED17	MED17	0.624452123102138	9.50295260778111e-52	0.732269959049186
UPF1	UPF1	UPF1	0.563474202220632	2.12294807141685e-40	0.63790910088395
MDM2	MDM2	MDM2	0.884417966140034	1.13033269861971e-155	1.39569687660017
NARS2	NARS2	NARS2	0.791502771709048	2.80003497361955e-101	1.07544216815311
AVEN	AVEN	AVEN	0.500820973586695	5.88565710400638e-31	0.550401375657988
MEX3A	MEX3A	MEX3A	0.202639958185297	1.04105484290929e-05	0.205484030724925
ANKRD10	ANKRD10	ANKRD10	0.504347100079972	1.94531799874935e-31	0.555119189653726
IQCK	IQCK	IQCK	0.322923891728598	9.02951359785477e-13	0.334907974464905
FLYWCH1	FLYWCH1	FLYWCH1	0.27321860428869	2.01482157845267e-09	0.280338784435066
GDAP2	GDAP2	GDAP2	0.7290554980459	2.01734832611533e-78	0.926708286723649
ABCA5	ABCA5	ABCA5	0.270976248345186	2.75685037267553e-09	0.277917135507926
IGKC	IGKC	IGKC	-0.0498831645888664	0.282550911759495	-0.0499246017321899
SLC5A6	SLC5A6	SLC5A6	0.519095707194488	1.64462878794563e-33	0.575101116235523
HELZ	HELZ	HELZ	0.508738935030793	4.8112472220098e-32	0.561026875739719
RPL7P9	RPL7P9	RPL7P9	-0.0939366092280439	0.0426777345792951	-0.0942143829677112
REEP3	REEP3	REEP3	0.352205340522615	4.68450777246768e-15	0.367959180771848
HN1	HN1	HN1	0.296280355328564	6.76743724575608e-11	0.305437066115912
SERP2	SERP2	SERP2	0.23773754259422	2.07042833161446e-07	0.242374750479544
TROVE2	TROVE2	TROVE2	0.446409346162107	3.32965330789181e-24	0.480206964823077
ARHGAP11A	ARHGAP11A	ARHGAP11A	0.285647137560892	3.36291025327206e-10	0.293820217100209
IL1R1	IL1R1	IL1R1	0.0550468273572824	0.235620067173917	0.0551025287694219
CNIH4	CNIH4	CNIH4	0.589189631944296	6.82382861776487e-45	0.676423891708218
DNAJB4	DNAJB4	DNAJB4	0.278202631154086	9.9331809406159e-10	0.285732864381699
SLC15A3	SLC15A3	SLC15A3	0.2938488646067	9.82213942565809e-11	0.302773691901686
MIER2	MIER2	MIER2	0.232574643763113	3.83654103977363e-07	0.236909623979827
N4BP2L1	N4BP2L1	N4BP2L1	0.210767488109516	4.44781183803538e-06	0.213974377950014
PI4KB	PI4KB	PI4KB	0.751452830127698	7.85445311144754e-86	0.976284132611459
RMI2	RMI2	RMI2	0.201735837330132	1.14197561282329e-05	0.204541374040232
ZFYVE19	ZFYVE19	ZFYVE19	0.541907649676594	6.35263162186933e-37	0.606852430158934
MMD	MMD	MMD	0.111754737770298	0.0157984460440164	0.112223494931484
SCG2	SCG2	SCG2	0.0831193142420754	0.0730395653033109	0.0833115304705031
TMEM119	TMEM119	TMEM119	0.0549267043291709	0.236645255819063	0.0549820414423786
TRUB1	TRUB1	TRUB1	0.385814478453297	5.46986179725854e-18	0.406873140998152
COLGALT2	COLGALT2	COLGALT2	0.10920847737741	0.0183631701574469	0.109645768874333
TXNDC9	TXNDC9	TXNDC9	0.345158749988602	1.74908331768012e-14	0.359937237468662
TTC23	TTC23	TTC23	0.863164488805454	8.48084556174142e-140	1.30562605144046
BMP8B	BMP8B	BMP8B	0.249883284378218	4.58457525715248e-08	0.255288319093852
CSTF3	CSTF3	CSTF3	0.287411887011663	2.58914686358146e-10	0.29574281053739
MNDA	MNDA	MNDA	-0.281166319108406	6.47893026646587e-10	-0.28894805895774
SAMM50	SAMM50	SAMM50	0.653430306162939	4.45603286615788e-58	0.781261723616193
APOL3	APOL3	APOL3	0.00799914012043606	0.863267173835955	0.00799931073862671
VAV3	VAV3	VAV3	0.0632372941686008	0.172944429363955	0.0633217913742264
RP11.977G19.5	RP11.977G19.5	RP11.977G19.5	0.23821777153845	1.95356828947114e-07	0.242883809141022
HOXB3	HOXB3	HOXB3	0.129989546429298	0.00494667623269996	0.130729216770561
DYNC1I2	DYNC1I2	DYNC1I2	0.408348105676687	3.7408734013228e-20	0.4336271473586
MXI1	MXI1	MXI1	0.276617938456055	1.24571489612403e-09	0.284016051339894
MYSM1	MYSM1	MYSM1	0.274869045652978	1.59665256658601e-09	0.282123238898299
ETS1	ETS1	ETS1	0.234179829839007	3.17187145249981e-07	0.238607272838377
TUG1	TUG1	TUG1	0.282394044358505	5.41972055531435e-10	0.290281673524161
ELL	ELL	ELL	0.467811570556628	1.02282472563951e-26	0.507265112845231
RP11.156K23.3	RP11.156K23.3	RP11.156K23.3	0.289103136588451	2.01179410889328e-10	0.297587325909614
MMP2	MMP2	MMP2	0.105106540247725	0.0232602346513203	0.105496177005843
SRP14.AS1	SRP14.AS1	SRP14.AS1	0.268643994128583	3.80830999357377e-09	0.275401767269938
NPAS2	NPAS2	NPAS2	0.288787357631556	2.10910265465067e-10	0.297242781126845
SACS	SACS	SACS	0.276367691279143	1.29088985670585e-09	0.283745089603292
ADAM12	ADAM12	ADAM12	0.028510105396245	0.539267881458589	0.0285178337516997
JDP2	JDP2	JDP2	0.164999434819988	0.000347789724657665	0.166521739576855
SNRPN	SNRPN	SNRPN	0.381038249311306	1.49927962780131e-17	0.401273685587358
KLHDC4	KLHDC4	KLHDC4	0.563312702889037	2.25903766616504e-40	0.637672502267776
EVI5	EVI5	EVI5	0.461239881394429	6.31351238726736e-26	0.498885082631552
APOBEC3G	APOBEC3G	APOBEC3G	0.0577729060232729	0.213192011678071	0.0578373114288941
[truncated: 2,399 more rows]
