# Supplementary material for: Epigenomic and genomic analysis of transcriptome modulation in skin cutaneous melanoma
Source: Aging (Albany NY). 2020 Jul 7;12(13):12703–25. doi: 10.18632/aging.103115 (PMC7377867; doi:10.18632/aging.103115)
Supplement: Supplementary Table 3 [file aging-12-103115-s014..xlsx]

## Sheet: S3_Table
Supplementary Table 3. Included METcor gene set for multi-omics analysis.
MetProbe	MetGene	ExpGene	Cor	Cor.pvalue	Z_value
cg16853712	RAB4B	RAB4B	-0.106846943389017	0.0210592120425693	-0.107256349228725
cg27136270	RAB4B	RAB4B	0.0734823321264749	0.113160157749187	0.0736150219816817
cg22032540	RAB4B	RAB4B	-0.0524726649970168	0.258279967372922	-0.0525209037860951
cg04671526	RAB4B	RAB4B	-0.0423785861211323	0.361357687989289	-0.0424039833577299
cg13332130	RAB4B	RAB4B	-0.133881911084049	0.00378679780792563	-0.13469054170894
cg20611850	RAB4B	RAB4B	-0.12640549613376	0.00628825846464335	-0.127085275581521
cg15535636	RAB4B	RAB4B	-0.104874747072098	0.0235678969369317	-0.105261800286276
cg25621094	RAB4B	RAB4B	-0.0884997006753607	0.0562540509341387	-0.0887318415904188
cg10787145	RAB4B	RAB4B	-0.0789252483341993	0.088785045657418	-0.0790897438274529
cg20951968	RAB4B	RAB4B	-0.113194113388955	0.0144922578670879	-0.113681312936166
cg07222059	C12orf5	C12orf5	-0.010969775682447	0.813296081786771	-0.0109702157337834
cg18124330	C12orf5	C12orf5	0.0899888794301185	0.0522199738511497	0.0902329764853826
cg17227355	C12orf5	C12orf5	0.0325059817702356	0.483922233926668	0.0325174380619521
cg05535924	C12orf5	C12orf5	0.176528067757879	0.000127827797422746	0.178396799669234
cg08620636	C12orf5	C12orf5	0.101823527582377	0.0279576769802541	0.102177636207636
cg05651176	C12orf5	C12orf5	0.283198652318573	4.81906356280224e-10	0.291156222533169
cg14964285	C12orf5	C12orf5	-0.150361021576892	0.0011312976773833	-0.151509787951726
cg21092413	RNF44	RNF44	-0.264245963217624	6.94551119960531e-09	-0.270667636604364
cg08283293	RNF44	RNF44	0.0612340292584575	0.186985507865632	0.0613107364069457
cg24062754	RNF44	RNF44	-0.0508382144671658	0.273425917825492	-0.0508820800395808
cg02364793	RNF44	RNF44	-0.129377671757192	0.00515565451466054	-0.130106875645192
cg17032533	RNF44	RNF44	-0.0559918752037252	0.227663751622925	-0.0560504987082823
cg25991937	RNF44	RNF44	-0.119176343322967	0.0100258348882512	-0.119745421389024
cg18505871	RNF44	RNF44	-0.318057942160359	2.0522930359196e-12	-0.329484990613366
cg10082991	RNF44	RNF44	-0.0475167895397301	0.306038471839351	-0.0475525999179627
cg08984586	RNF44	RNF44	-0.123137507343941	0.00778698930986	-0.123765603231417
cg07768103	RNF44	RNF44	-0.313934210415964	4.06819903539608e-12	-0.324903801651661
cg08866634	RNF44	RNF44	-0.258419259347583	1.51423320623741e-08	-0.264413806168763
cg12686260	RNF44	RNF44	-0.202979917852783	1.00535112251886e-05	-0.20583857339997
cg11780327	RNF44	RNF44	-0.200654670912739	1.27489105140671e-05	-0.203414596050816
cg07116015	RPL23A	RPL23A	-0.119977652735082	0.00953155664286517	-0.120558354702966
cg08165291	RPL23A	RPL23A	-0.0944955380478136	0.0414536021010613	-0.0947783176640611
cg12456777	RPL23A	RPL23A	-0.076928982017512	0.0971828903292381	-0.0770812801601502
cg26397172	RPL23A	RPL23A	-0.0282056427817784	0.543610885365422	-0.0282131260984158
cg11938646	RPL23A	RPL23A	-0.108189277152924	0.0194874030270821	-0.108614382263576
cg17279327	RPL23A	RPL23A	-0.124899178341257	0.00694354634105244	-0.125554793448829
cg19009921	RPL23A	RPL23A	0.0181179776758684	0.696466310763355	0.0181199605422733
cg17195329	RPL23A	RPL23A	-0.0232214275937299	0.617073069332736	-0.0232256028778648
cg09421092	RPL23A	RPL23A	-0.217778296269016	2.07849589574834e-06	-0.221322599981156
cg25138936	RPL23A	RPL23A	0.0172779794968425	0.709888109444793	0.0172796991284041
cg04532153	RPL23A	RPL23A	-0.0992248683705335	0.0322333323402227	-0.0995524476272665
cg06964756	RPL23A	RPL23A	-0.044060046789467	0.342604254421286	-0.0440885911204767
cg22113187	RPL23A	RPL23A	0.0590405765673608	0.203302818762595	0.0591093214136471
cg15391464	RPL23A	RPL23A	-0.0592435563716473	0.201750795623284	-0.0593130136902342
cg06746360	RPL23A	RPL23A	-0.105694655250654	0.0224951728618919	-0.106090898963
cg00639656	RPL23A	RPL23A	-0.218491028906507	1.92106604683331e-06	-0.222070940754382
cg20824457	RPL23A	RPL23A	-0.0275651167115723	0.552803932203017	-0.027572101549123
cg19548004	RPL23A	RPL23A	-0.190914416139204	3.34770841167046e-05	-0.193286003396514
cg25877179	RPL23A	RPL23A	0.0289756531153966	0.532660756380789	0.0289837664110089
cg10025462	RPL23A	RPL23A	0.0446049651261969	0.336662260171835	0.0446345825465846
cg20850016	ARL8B	ARL8B	-0.176139406840633	0.000132353194613724	-0.177995666063663
cg20503117	ARL8B	ARL8B	0.270269853828526	3.04126760222144e-09	0.277154918594647
cg18604876	ARL8B	ARL8B	0.167697695441031	0.000276737702118677	0.169296792919539
cg13297988	ARL8B	ARL8B	0.0152618000455053	0.74246463025118	0.0152629851502127
cg06497954	ARL8B	ARL8B	0.051193586095203	0.27008237154283	0.0512383789829044
cg07330908	ARL8B	ARL8B	-0.0885132901196971	0.0562161010829124	-0.0887455383267662
cg16080656	ARL8B	ARL8B	-0.197700488665575	1.71719933565116e-05	-0.200338372139067
cg08806444	ARL8B	ARL8B	0.020434045566282	0.659957632533023	0.0204368903590839
cg09988191	MFSD3	MFSD3	-0.0288553761855425	0.534363825539655	-0.0288633888324746
cg23413007	MFSD3	MFSD3	-0.0597451781083258	0.197952270528777	-0.0598164172747438
cg00010266	MFSD3	MFSD3	0.0664642364390051	0.152001740537599	0.0665623651316993
cg01990611	MFSD3	MFSD3	-0.0655848250303481	0.157508297029668	-0.0656791033160693
cg17820989	MFSD3	MFSD3	-0.194685919047345	2.31658901899962e-05	-0.197203118285931
cg08818193	MFSD3	MFSD3	-0.249124194834568	5.04940855077527e-08	-0.254478837562776
cg17958180	MFSD3	MFSD3	0.167982884090453	0.000270078409567798	0.16959024831619
cg05340032	MFSD3	MFSD3	0.21845530729717	1.92867674871926e-06	0.22203342867373
cg14743352	MFSD3	MFSD3	-0.0954874342848557	0.0393541554446362	-0.0957792457430119
cg17739026	PIGV	PIGV	-0.063196503559913	0.173222271063467	-0.0632808370968292
cg11699374	PIGV	PIGV	-0.161166100123617	0.000478320709802286	-0.162583662475671
cg03129904	PIGV	PIGV	-0.115924883390441	0.0122728180946562	-0.116448399659084
cg26899490	PIGV	PIGV	-0.23146021856089	4.37474872157435e-07	-0.235731793556539
cg12806381	PIGV	PIGV	0.0806735327812379	0.0819184798051088	0.0808492330608144
cg08231251	PIGV	PIGV	-0.0762779879782396	0.100054431570544	-0.0764264434539152
cg10971346	PIGV	PIGV	0.0992842921072443	0.0321296499223491	0.099612462599799
cg19634537	PIGV	PIGV	0.0793470403565499	0.0870875014121267	0.0795141939878384
cg14557189	PIGV	PIGV	-0.0412034327994192	0.374837781053125	-0.0412267739168757
cg17168636	PIGV	PIGV	-0.130221975375762	0.00486931577897801	-0.130965647908381
cg23283076	PIGV	PIGV	-0.175067847751429	0.000145621664495301	-0.176890012212137
cg02375201	PIGV	PIGV	-0.0474738720103038	0.3064760312845	-0.0475095853560036
cg27295033	PIGV	PIGV	-0.108604183677468	0.0190227026175226	-0.109034221847048
cg18289893	PIGV	PIGV	-0.243917035837607	9.71111398164804e-08	-0.248934734256151
cg18028470	PIGV	PIGV	0.0381311757451205	0.411517021457909	0.0381496726233954
cg00114008	PIGV	PIGV	-0.11802644853628	0.0107748796402743	-0.118579120944915
cg22662233	ZNF708	ZNF708	-0.0619253029538057	0.182048448992419	-0.062004641456653
cg04364726	ZNF708	ZNF708	0.0242177170874365	0.602045609272242	0.0242224533003152
cg18121245	ZNF708	ZNF708	-0.219284986741023	1.75914719551152e-06	-0.222904853012238
cg07605620	ZNF708	ZNF708	-0.0145942963574201	0.753355347102752	-0.014595332653211
cg12070036	ZNF708	ZNF708	-0.129208763215103	0.00521472708160002	-0.129935095499303
cg19274837	ZNF708	ZNF708	0.0469165735851491	0.312195392547391	0.0469510428247428
cg24871132	PFN2	PFN2	-0.0314840814536747	0.497777616237557	-0.0314944904829334
cg08828664	PFN2	PFN2	-0.0764625277368976	0.0992336592867406	-0.0766120658401406
cg15679432	PFN2	PFN2	0.169556860948709	0.000235939856595029	0.171210371967324
cg02929869	PFN2	PFN2	0.0195547491493323	0.67372911629483	0.0195572422232199
cg12311052	PFN2	PFN2	-0.19581057497587	2.07286128493447e-05	-0.198372347573442
cg17660078	PFN2	PFN2	-0.0748927015840394	0.106389238835691	-0.0750331970137669
cg00880682	PFN2	PFN2	0.102126093895128	0.0274930637550037	0.102483381930404
cg01070987	PFN2	PFN2	-0.413388868761662	1.16320005887422e-20	-0.439691710249837
cg10685336	PFN2	PFN2	-0.0385075452956828	0.406912752318147	-0.0385265956421642
cg20984735	PFN2	PFN2	0.0536660932004819	0.24759376319363	0.0537177027487393
cg10709925	PFN2	PFN2	0.127173392010662	0.0059760364155876	0.127865717543304
cg13715862	PFN2	PFN2	-0.312144566310794	5.45687169304412e-12	-0.322919730384268
cg00619347	PFN2	PFN2	-0.0737482208303073	0.111858426412126	-0.0738823594446907
cg19789417	PFN2	PFN2	-0.00983649368000059	0.832282143375548	-0.00983681094700684
cg03539876	PFN2	PFN2	-0.180641254157818	8.80575357036079e-05	-0.182645494260649
cg10636490	PFN2	PFN2	-0.407923438713138	4.12402271926112e-20	-0.433117603152734
cg24134071	RAD23A	RAD23A	0.0766321760381699	0.0984838524407988	0.076782714054546
cg21033655	RAD23A	RAD23A	0.0835263540302146	0.0716410386154254	0.0837214159743705
cg06907141	RAD23A	RAD23A	-0.018707881004119	0.687096627599965	-0.0187100639539402
cg11913104	RAD23A	RAD23A	-0.0801001951013813	0.084121363783322	-0.0802721663318985
cg06742493	RAD23A	RAD23A	-0.0925791342808725	0.045778179977715	-0.0928449982217764
cg27180563	RAD23A	RAD23A	-0.0559060549921263	0.228378289777188	-0.0559644090111964
cg02962892	SIN3B	SIN3B	-0.0597413757094948	0.197980866632462	-0.0598126012555515
cg00757391	SIN3B	SIN3B	-0.0574609964052315	0.215677432281282	-0.0575243629089907
cg11390978	SIN3B	SIN3B	0.162936241052314	0.000413224578870144	0.164401542517968
cg06815056	SIN3B	SIN3B	-0.0659768711162203	0.155035114910867	-0.0660728532101034
cg03384915	SIN3B	SIN3B	0.0472112169555539	0.309162891458262	0.0472463402841989
cg18033235	SIN3B	SIN3B	-0.00179815174155024	0.96911957418124	-0.00179815367957177
cg04697482	SIN3B	SIN3B	0.0520089450679952	0.262516962780802	0.0520559148465396
cg01677310	SIN3B	SIN3B	-0.13035409713175	0.00482582899868362	-0.131100051155995
cg06670911	CTSA	CTSA	-0.0315220617061537	0.497258924278319	-0.0315325084661179
cg08260891	CTSA	CTSA	0.204093883998811	8.96349622827732e-06	0.207000682702852
cg10782811	CTSA	CTSA	-0.0282455546145557	0.543040576830824	-0.0282530697536863
cg13270406	CTSA	CTSA	-0.0626418275849411	0.177033467671855	-0.0627239565165964
cg11992317	CTSA	CTSA	0.0356401591779053	0.44275881544321	0.0356552609813916
cg25241845	CTSA	CTSA	0.0106020095077838	0.819445925503532	0.0106024067657402
cg16698835	CTSA	CTSA	0.0326818970486955	0.481558311422583	0.0326935404258357
cg13788090	CTSA	CTSA	0.0248728738219625	0.592254130348468	0.024878005009587
cg09638001	CTSA	CTSA	-0.107576012970551	0.0201923627916507	-0.107993896434068
cg10247878	CTSA	CTSA	-0.0501610128558483	0.279875247900084	-0.0502031469795068
cg17437181	CTSA	CTSA	-0.0215869025852285	0.642074824582232	-0.0215902566480377
cg03560963	CTSA	CTSA	0.0600169156139098	0.195916448175215	0.0600891326684642
cg21986422	CTSA	CTSA	0.0297226438566177	0.522145361550594	0.0297314011791565
cg07552707	CTSA	CTSA	0.109874966412265	0.0176589773845117	0.110320352526923
cg05136650	CTSA	CTSA	0.0605055662866825	0.192294095756285	0.0605795643130281
cg21762107	CTSA	CTSA	0.0366603353725692	0.429803554663228	0.0366767722172446
cg02664993	CTSA	CTSA	0.0400953497863019	0.387828356384581	0.0401168567923364
cg03206537	CTSA	CTSA	-0.162984507535604	0.000411570953969422	-0.164451125737388
cg19067730	CTSA	CTSA	0.204566794530188	8.53564032584884e-06	0.20749419794438
cg19748509	HCG4P5	HCG4P5	-0.123557985315385	0.00757776092770943	-0.124192577480353
cg19151378	HCG4P5	HCG4P5	-0.0982813466510748	0.0339182691329533	-0.0985996338262232
cg23489273	HCG4P5	HCG4P5	-0.100239310718473	0.0305020169533738	-0.100577081577625
cg18350391	IL32	IL32	-0.447261822215671	2.66488609186112e-24	-0.481272110079575
cg00239353	IL32	IL32	-0.448695978702591	1.82955408116e-24	-0.483066342984269
cg26724967	IL32	IL32	-0.281995046249967	5.74399215132264e-10	-0.289848152497916
cg23813257	IL32	IL32	-0.359584937796896	1.13744297485459e-15	-0.376409119257287
cg00471190	IL32	IL32	-0.573029212979336	5.05467048073116e-42	-0.652021438987674
cg08659421	IL32	IL32	0.0473079651202713	0.308171395219362	0.0473433050167115
cg08978665	IL32	IL32	-0.252134916926553	3.43625041768965e-08	-0.257691357747264
cg02487239	PTPN4	PTPN4	-0.0888878016174253	0.055178573676017	-0.0891230197725972
cg26333591	PTPN4	PTPN4	-0.0186674780900573	0.687736857892342	-0.0186696469250596
cg05396229	PTPN4	PTPN4	0.0874418756037137	0.0592740409897875	0.0876657662085929
cg01308931	PTPN4	PTPN4	-0.106377274191682	0.0216346002933442	-0.106781280321722
cg22730357	PTPN4	PTPN4	0.0196365779390336	0.672442819808934	0.0196391024464765
cg27370993	PTPN4	PTPN4	-0.0813363442528399	0.0794301940779075	-0.0815164225213323
cg24856518	PTPN4	PTPN4	-0.0146744083354628	0.752045638230564	-0.014675461792095
cg01585784	PTPN4	PTPN4	-0.0802212172263536	0.083652435019211	-0.0803939711429251
cg21590967	PTPN4	PTPN4	-0.000498960534596774	0.991429169073103	-0.000498960576004136
cg17951368	NUCB2	NUCB2	-0.0601941182094391	0.194597133569346	-0.0602669777606574
cg17317180	NUCB2	NUCB2	-0.0567902239449646	0.221092731177637	-0.0568513943009208
cg21620535	NUCB2	NUCB2	-0.25420977907578	2.6280256195497e-08	-0.259908319839134
cg14975318	NUCB2	NUCB2	-0.00702029398746682	0.879863569433327	-0.00702040932150178
cg21045841	NUCB2	NUCB2	-0.0748149891380016	0.106753791992236	-0.0749550466837179
cg04734688	NUCB2	NUCB2	-0.0409915454146882	0.37730088394426	-0.041014528047305
cg17510133	NUCB2	NUCB2	-0.0386772963113588	0.404846188257351	-0.0386965998582707
cg12575751	NUCB2	NUCB2	-0.0452381055589845	0.329841762383569	-0.0452690032263552
cg09178514	NUCB2	NUCB2	-0.0438031005559785	0.345429136670137	-0.04383114802472
cg00324733	NUCB2	NUCB2	-0.0447672682196925	0.334905293109926	-0.0447972103836778
cg07029397	NUCB2	NUCB2	-0.0402830102915811	0.385609292945121	-0.0403048208921821
cg21795654	NUCB2	NUCB2	-0.0375004640818243	0.419301472183222	-0.0375180577068235
cg08019651	NUCB2	NUCB2	0.142383240060517	0.00206245200698874	0.143357293848434
cg09163686	NUCB2	NUCB2	-0.0875940389178305	0.0588315424558458	-0.0878191039973767
cg00218631	NUCB2	NUCB2	-0.0536351160504543	0.247867179541925	-0.0536866361770814
cg00723019	TMEM143	TMEM143	-0.0450100242012297	0.332288417431907	-0.0450404565050572
cg17932394	TMEM143	TMEM143	-0.0114512171505047	0.805262708646303	-0.0114517177240196
cg18655958	TMEM143	TMEM143	-0.0698938061631415	0.131915619834765	-0.0700079547021783
cg06730468	TMEM143	TMEM143	-0.0200863308807481	0.665390124716298	-0.0200890328831632
cg22942571	TMEM143	TMEM143	-0.0502494577539636	0.279027141421983	-0.0502918153721855
cg04164538	TMEM143	TMEM143	-0.0757627764699762	0.102374504955463	-0.0759082371687501
cg25711079	SERTAD2	SERTAD2	-0.0467958103417698	0.313443926637435	-0.0468300138617972
cg00483304	SERTAD2	SERTAD2	-0.180010452965015	9.3287233007461e-05	-0.181993491603333
cg21174506	SERTAD2	SERTAD2	0.0195593430561878	0.673656877759891	0.0195618378878162
cg18462521	SERTAD2	SERTAD2	-0.115252771513471	0.01278924826363	-0.115767186214133
cg00688465	SERTAD2	SERTAD2	0.166636112582013	0.000302898107337882	0.168204691416705
cg25986403	SERTAD2	SERTAD2	0.206034578456118	7.32815249971372e-06	0.209026569145059
cg13528561	SERTAD2	SERTAD2	-0.148823880155586	0.00127299926473801	-0.149937460810823
cg04576855	SERTAD2	SERTAD2	-0.102794050757588	0.0264908194381936	-0.103158425470954
cg09088257	ST3GAL6	ST3GAL6	-0.0685154288385724	0.139727006371771	-0.0686229439510829
cg10128511	ST3GAL6	ST3GAL6	-0.222833274064401	1.18211645575944e-06	-0.226635448587157
cg04251363	ST3GAL6	ST3GAL6	0.0258005285028524	0.578516112401836	0.0258062556462495
cg07390647	ST3GAL6	ST3GAL6	-0.221378174154107	1.39252548239469e-06	-0.225104842073229
cg13338207	ST3GAL6	ST3GAL6	-0.0728828215115449	0.116138871884129	-0.0730122832668741
cg16449251	ST3GAL6	ST3GAL6	0.0343539538066292	0.459405211363958	0.0343674781630888
cg04068578	ST3GAL6	ST3GAL6	-0.459835631865493	9.26766993365269e-26	-0.497102824386942
cg26474288	ST3GAL6	ST3GAL6	-0.100681536407519	0.0297725733619633	-0.101023815849063
cg20521702	ST3GAL6	ST3GAL6	-0.106786459975244	0.0211325563167793	-0.107195167745976
cg18182358	ST3GAL6	ST3GAL6	-0.148082238870508	0.00134705325915806	-0.149179106642944
cg00229423	ST3GAL6	ST3GAL6	0.0518625822682164	0.263864153993568	0.0519091561909183
cg23331010	ST3GAL6	ST3GAL6	-0.217853831261793	2.06124383990721e-06	-0.221401897135283
cg11362770	ST3GAL6	ST3GAL6	-0.0852305143570098	0.0660213513598175	-0.0854377968801999
cg01617074	SLC45A4	SLC45A4	-0.0718831738538497	0.121241867268079	-0.0720073704858531
cg10724191	SLC45A4	SLC45A4	0.00822102573967266	0.859513166893199	0.00822121095391555
cg18521305	SLC45A4	SLC45A4	-0.0282250948150917	0.543332894080313	-0.0282325936299685
cg02709064	SLC45A4	SLC45A4	0.215969458911631	2.53541443571866e-06	0.219424485561279
cg25445213	SLC45A4	SLC45A4	-0.0814331330755455	0.0790720155221139	-0.0816138566970097
cg22284058	SLC45A4	SLC45A4	-0.0227078647899818	0.624882792976432	-0.0227117690797131
cg16967434	SLC45A4	SLC45A4	-0.0646093571081716	0.163791117181522	-0.06469948404966
cg00971369	SLC45A4	SLC45A4	0.106452979894983	0.0215409416665677	0.10685785314949
cg01366454	SLC45A4	SLC45A4	-0.0417168664766854	0.368910539572352	-0.0417410916889707
cg15586392	SLC45A4	SLC45A4	-0.0467409530200299	0.314012160112069	-0.0467750362886132
cg09238000	SLC45A4	SLC45A4	0.00735526937652792	0.874177739705728	0.00735540202082771
cg24298294	SLC45A4	SLC45A4	-0.0453678292167708	0.328455402886608	-0.045398993671366
cg08955358	SLC45A4	SLC45A4	0.00352237629548322	0.939551425902564	0.00352239086312419
cg01657511	SLC45A4	SLC45A4	-0.0805276420671833	0.0824745496819665	-0.0807023883766549
cg07769015	SLC45A4	SLC45A4	-0.105534413339442	0.0227014348442092	-0.105928849481855
cg05176958	SLC45A4	SLC45A4	-0.0576545202252618	0.214132919484341	-0.0577185299848753
cg17207736	SLC45A4	SLC45A4	-0.062341959431418	0.179119628332526	-0.0624229127134575
cg25367206	SLC45A4	SLC45A4	0.22829881388375	6.32605501593362e-07	0.232394001204053
cg01081737	SLC45A4	SLC45A4	-0.073017537899546	0.11546422977254	-0.0731477204148444
cg18254417	SLC45A4	SLC45A4	0.183562889537225	6.72378106118852e-05	0.185667340008646
cg21861233	SLC45A4	SLC45A4	-0.13869224288868	0.00269602054584666	-0.139591922752038
cg09380198	MTRF1	MTRF1	-0.165248214477382	0.000340588023868569	-0.166777492565363
cg19921439	MTRF1	MTRF1	-0.202604400576475	1.04485817356259e-05	-0.205446950770864
cg02178898	MTRF1	MTRF1	-0.182498542308403	7.42169018619011e-05	-0.184566100883178
cg11095404	MTRF1	MTRF1	-0.226081232812715	8.16815694445859e-07	-0.230055728292684
cg26215849	MTRF1	MTRF1	-0.289363594208241	1.93483554274237e-10	-0.297871561529461
cg25627728	MTRF1	MTRF1	-0.128533886434012	0.00545688310018955	-0.129248821171013
cg21446692	MTRF1	MTRF1	-0.147901258760866	0.00136571583314918	-0.148994074030306
cg20451680	ESM1	ESM1	-0.0390850475979217	0.399907815722759	-0.0391049684999955
cg07233761	ESM1	ESM1	-0.0270624572690655	0.560071097542217	-0.0270690668104677
cg14972155	ESM1	ESM1	-0.0508682620389718	0.273142125633492	-0.0509122055174365
cg10631947	ESM1	ESM1	-0.0530496110596797	0.253074719315857	-0.0530994604148767
cg20673840	ESM1	ESM1	-0.0393193367334643	0.397086690251409	-0.0393396182491381
cg21180956	ESM1	ESM1	-0.0614222052677065	0.185631899026501	-0.061499622844713
cg06837426	ESM1	ESM1	-0.0390662135621557	0.400135120826906	-0.0390861056624699
cg04749631	RWDD2A	RWDD2A	-0.132066065348422	0.00429317662899457	-0.132842009532128
cg22814048	RWDD2A	RWDD2A	-0.120712596933335	0.00909738369286319	-0.12130409952098
cg04887278	RWDD2A	RWDD2A	-0.0594944493730007	0.199844341263732	-0.0595647941380588
cg19119071	RWDD2A	RWDD2A	-0.127941547745315	0.00567771018842785	-0.128646578638021
cg14079414	SCFD2	SCFD2	0.102155992529333	0.027447514677509	0.102513595779436
cg08225341	SCFD2	SCFD2	0.0795601087081661	0.0862399670872445	0.0797286159584203
cg21789229	SCFD2	SCFD2	0.0358009790817611	0.440701900971727	0.0358162863473707
cg22123729	SCFD2	SCFD2	0.0790007977760747	0.0884790506339167	0.0791657672877286
cg25061071	SCFD2	SCFD2	0.134561897706578	0.00361154585058645	0.135383003417607
cg20601329	SCFD2	SCFD2	-0.0965418496659214	0.0372217571275879	-0.0968434721287626
cg26270411	YWHAB	YWHAB	-0.101447764241352	0.0285440682793854	-0.101797950785771
cg21757774	YWHAB	YWHAB	-0.00858063935218891	0.853435739786991	-0.00858084995146687
cg22799917	YWHAB	YWHAB	0.0421440252446505	0.364023830840765	0.0421690028006682
cg21511991	YWHAB	YWHAB	0.0874100849442197	0.0593668366463434	0.0876337306919668
cg15324310	YWHAB	YWHAB	-0.0349916802661271	0.451108273184335	-0.035005972244623
cg10774185	YWHAB	YWHAB	-0.189375319021766	3.88254432509797e-05	-0.191689172378254
cg13447416	TOMM40	TOMM40	-0.110936990471089	0.0165855899667857	-0.111395481960598
cg12540815	TOMM40	TOMM40	0.0153057533954126	0.741749278442788	0.0153069487697574
cg02613937	TOMM40	TOMM40	-0.206469436274735	7.00289778006209e-06	-0.209480747677147
cg12266551	TOMM40	TOMM40	-0.0673469895825042	0.146622442734365	-0.0674490876238439
cg06632829	TOMM40	TOMM40	-0.0912705017423176	0.0489439872579964	-0.0915252130767563
cg19375044	TOMM40	TOMM40	0.057253325084274	0.217343734904861	0.0573160061259853
cg25112826	NDUFAF2	NDUFAF2	0.00170995674872661	0.970633484884686	0.00170995841534012
cg17409276	NDUFAF2	NDUFAF2	-0.069639583542321	0.133330374298311	-0.0697524886264959
cg06610675	NDUFAF2	NDUFAF2	-0.0832042113534696	0.072746048581786	-0.0833970188089369
cg23316671	NDUFAF2	NDUFAF2	-0.0567908811331624	0.221087378431374	-0.0568520536155181
cg00693583	SEPSECS	SEPSECS	-0.122232674897233	0.00825481661278909	-0.122846943388698
cg04611865	SEPSECS	SEPSECS	-0.135543000993416	0.00337162990347145	-0.136382333740283
cg08733824	SEPSECS	SEPSECS	-0.129646656170935	0.00506282578837626	-0.130380448813038
cg18815539	SEPSECS	SEPSECS	0.0430454268907225	0.353844912051135	0.0430720429036412
cg16148403	SEPSECS	SEPSECS	-0.00349325285231004	0.94005027974602	-0.0034932670615874
cg05908079	CWC27	CWC27	-0.0583809328093996	0.208406388268901	-0.0584473960057695
cg14875131	CWC27	CWC27	-0.134604836561214	0.00360073009463665	-0.135426734356878
cg16084842	CWC27	CWC27	0.0840113327368542	0.0700033590209003	0.0842098219425527
cg25136045	CWC27	CWC27	-0.199784221982065	1.39246330592956e-05	-0.202507795385361
cg23697400	CWC27	CWC27	0.00897911205131778	0.846711725854048	0.00897935337499178
cg18508148	APIP	APIP	-0.191640271996312	3.12042045271123e-05	-0.194039424735082
cg15988239	APIP	APIP	-0.161720447558124	0.00045697498552182	-0.163152845061776
cg25931580	APIP	APIP	-0.16355279158631	0.000392559131158185	-0.165034973224778
cg14686008	APIP	APIP	-0.162317814445074	0.000434966691760644	-0.163766315695023
cg07253191	APIP	APIP	-0.0432382473518358	0.351691024733038	-0.0432652229154942
cg20541753	APIP	APIP	-0.127135304602852	0.00599118811686314	-0.127827004209469
cg25948180	APIP	APIP	-0.0729874478939846	0.115614649565989	-0.0731174691894903
cg22717608	APIP	APIP	-0.241060351699569	1.38157729157048e-07	-0.245899578025081
cg02474183	APIP	APIP	0.0119087103137681	0.797647864742559	0.0119092733157122
cg24088639	APIP	APIP	0.0479072856691571	0.30207619704575	0.0479439870210911
cg20869710	APIP	APIP	-0.154393251804769	0.000825758620693688	-0.155637873462548
cg06937548	APIP	APIP	-0.142843405757975	0.00199383147668576	-0.143827012965249
cg11058730	APIP	APIP	-0.0436768260499521	0.346822814364181	-0.0437046314690247
cg25883261	APIP	APIP	-0.0790885705925514	0.0881246123906476	-0.079254091962315
cg11622362	APIP	APIP	-0.160087131887323	0.000522549867690091	-0.161476118477791
cg09194750	APIP	APIP	-0.214756377993434	2.89409819917025e-06	-0.218152403794905
cg23119631	MAF1	MAF1	0.161148603879003	0.000479009274319694	0.162565699707574
cg11883258	MAF1	MAF1	-0.0729387201936407	0.115858564746383	-0.0730684806934088
cg19517467	MAF1	MAF1	-0.24238817029725	1.17340516982163e-07	-0.247309796838686
cg17170088	MAF1	MAF1	-0.33222327305365	1.80355105519716e-13	-0.345325291449278
cg02621020	MAF1	MAF1	0.0712170358239863	0.124738297805672	0.0713378046436289
cg20573110	MAF1	MAF1	-0.385222489507152	6.20359236159862e-18	-0.406177808584114
cg08825571	MAF1	MAF1	-0.234030092990562	3.22885267001917e-07	-0.238448853813866
cg08215925	FOXP1	FOXP1	-0.0991357831285937	0.0323893033789606	-0.0994624773715198
cg01232145	FOXP1	FOXP1	0.193614369273773	2.57390446218671e-05	0.196089594929634
cg12431087	FOXP1	FOXP1	-0.167944262380496	0.000270971396628664	-0.169550505388204
cg02862354	FOXP1	FOXP1	-0.213953850753613	3.15753401088368e-06	-0.217311225965553
cg20742234	FOXP1	FOXP1	-0.277034861831702	1.17384116790359e-09	-0.284467576377345
cg02900980	FOXP1	FOXP1	-0.0882444036439882	0.0569709533690534	-0.0884745350917287
cg07475026	FOXP1	FOXP1	0.280163810116271	7.49077564114153e-10	0.287859826652104
cg19992015	FOXP1	FOXP1	0.119135575941179	0.0100515792992014	0.119704066849577
cg21836903	FOXP1	FOXP1	-0.351729095040096	5.12609777148961e-15	-0.367415595418239
cg08038033	FOXP1	FOXP1	-0.199202129471765	1.47676218540082e-05	-0.201901576856748
cg11992992	FOXP1	FOXP1	-0.101819016533387	0.0279646547662404	-0.102173077900068
cg18665871	FOXP1	FOXP1	-0.325335070222851	5.97829788236582e-13	-0.337602211171434
cg20382675	FOXP1	FOXP1	0.106276185848334	0.0217602115758226	0.106679036068814
cg18481137	FOXP1	FOXP1	-0.0872880753485278	0.0597240939552319	-0.0875107830223899
cg01511742	FOXP1	FOXP1	-0.261532027159909	1.00089552465874e-08	-0.267752211369167
cg06690760	FOXP1	FOXP1	-0.115929714395603	0.0122691737507349	-0.116453296473211
cg05384123	FOXP1	FOXP1	0.155948161237497	0.000729867186027504	0.157231145981076
cg04794662	FOXP1	FOXP1	-0.11416421772328	0.0136663780664275	-0.114664118096183
cg05549077	FOXP1	FOXP1	-0.139760914819812	0.00249642659896549	-0.140681719458319
cg02692441	FOXP1	FOXP1	-0.221340841618456	1.39837000292922e-06	-0.225065585988158
cg23067085	FOXP1	FOXP1	-0.381736479677013	1.29513038524566e-17	-0.402090765438644
cg07516697	FOXP1	FOXP1	-0.164829942741151	0.000352777243793617	-0.166347508973163
cg22076311	FOXP1	FOXP1	-0.380641163451578	1.62917043200536e-17	-0.400809236547991
cg18558767	FOXP1	FOXP1	-0.134546585658401	0.00361540988077494	-0.135367409035577
cg06856329	FOXP1	FOXP1	0.091974171265598	0.0472196485742571	0.0922348396992426
cg18170784	FOXP1	FOXP1	-0.199070208722496	1.4965300672565e-05	-0.201764208745416
cg21067632	FOXP1	FOXP1	0.336260673821498	8.80909427997286e-14	0.349870479430059
cg15556723	FOXP1	FOXP1	0.295387183219512	7.7630075179948e-11	0.304458228367667
cg18166376	FOXP1	FOXP1	-0.385455951814742	5.90333668314103e-18	-0.406451981875527
cg07278181	FOXP1	FOXP1	0.247143199169217	6.48710660793987e-08	0.252367867925354
cg01331540	FOXP1	FOXP1	0.167442911000497	0.00028281645788059	0.169034647484322
cg24980458	FOXP1	FOXP1	0.00513877060073439	0.911906892070119	0.00513881583456003
cg24097241	FOXP1	FOXP1	0.135751270712849	0.00332260010329319	0.136594507488369
cg04514556	FOXP1	FOXP1	-0.207843513963936	6.06318972372388e-06	-0.210916436503347
cg04320255	FOXP1	FOXP1	-0.332115039187119	1.83826509271825e-13	-0.345203634386523
cg21758133	FOXP1	FOXP1	-0.224640191810231	9.63045200805205e-07	-0.228537584308582
cg23199517	FOXP1	FOXP1	0.290987600192083	1.51576380516905e-10	0.299644885230955
cg09312708	FOXP1	FOXP1	-0.0206675493175958	0.656319486964722	-0.0206704927699996
cg19536652	FOXP1	FOXP1	-0.292183835174899	1.26505910059407e-10	-0.300952277865924
cg07696592	FOXP1	FOXP1	-0.198502455225137	1.58451244009583e-05	-0.201173096848428
cg25809301	FOXP1	FOXP1	-0.181252324036537	8.32556901054588e-05	-0.183277248908415
cg01534217	FOXP1	FOXP1	-0.0454306254337492	0.327785653310024	-0.0454619195843253
cg20506347	FOXP1	FOXP1	-0.18757281818628	4.61161101489923e-05	-0.189820283401117
cg06241812	FOXP1	FOXP1	0.24490605228168	8.5864759141036e-08	0.249986585232547
cg07546770	RAD17	RAD17	0.191440646949021	3.18142781297618e-05	0.193832196966942
cg09169615	RAD17	RAD17	0.153382561840557	0.000894199239113908	0.154602668200821
cg10987255	RAD17	RAD17	-0.228078040555962	6.48982881043958e-07	-0.232161100758625
cg11641254	RAD17	RAD17	0.00934403109757895	0.84056364322015	0.00934430305713444
cg04526965	RAD17	RAD17	-0.0580608208907813	0.210916142111535	-0.0581261953198812
cg08432846	RAD17	RAD17	-0.0172262361432932	0.710717875753822	-0.0172279403696134
cg26072457	RAD17	RAD17	0.141832407149394	0.00214742949315844	0.142795107780302
cg18459375	RAD17	RAD17	0.0588598920881406	0.204691641442932	0.0589280068421972
cg16290399	RAD17	RAD17	-0.310763760274856	6.83538731560466e-12	-0.321390591918338
cg27077143	RAD17	RAD17	-0.318427503891438	1.92922940759569e-12	-0.329896198879103
cg04847242	RAD17	RAD17	0.170833055208077	0.000211269147614176	0.172524635818567
cg16271912	RAD17	RAD17	-0.216140758597645	2.48832886348419e-06	-0.219604173024463
cg02688226	RAD17	RAD17	-0.175516807774505	0.000139917296407686	-0.177353204952676
cg25129346	RAD17	RAD17	-0.0441555565715236	0.341557977893466	-0.0441842870789186
cg21949274	RAD17	RAD17	0.112289935327443	0.0153011860716576	0.112765494051284
cg21413258	RAD17	RAD17	0.0375731615967967	0.418399838851144	0.0375908577980535
cg12460105	RAD17	RAD17	0.0856503327758752	0.06469399825909	0.0858607025447132
cg11951292	RAD17	RAD17	-0.145498741959024	0.0016370415069851	-0.146538714419152
cg18652453	RAD17	RAD17	0.115915788655391	0.0122796814433858	0.116439181048734
cg02594687	RAD17	RAD17	0.0419810595764598	0.365883383329458	0.0420057482928557
cg22080086	RAD17	RAD17	0.189070138380898	3.99778242219239e-05	0.191372658892924
cg23308293	SPCS2	SPCS2	-0.272968563451199	2.08681063457366e-09	-0.280068592664982
cg10474368	SPCS2	SPCS2	-0.27907943300254	8.75815886950947e-10	-0.286683472293883
cg18145911	SPCS2	SPCS2	-0.175237702509506	0.000143438336119457	-0.177065242780748
cg10021803	SPCS2	SPCS2	-0.218319257926029	1.95792812033837e-06	-0.221890565739667
cg01621420	SPCS2	SPCS2	-0.294872207320638	8.40046033461367e-11	-0.303894117530604
cg09188845	SPCS2	SPCS2	-0.478461503331554	4.91901757482501e-28	-0.520987105235146
cg13601845	SPCS2	SPCS2	-0.120440429621672	0.00925607263168947	-0.121027916872062
cg17356532	SPCS2	SPCS2	0.0918014566982491	0.0476380975254792	0.0920606544206277
cg13987042	SPCS2	SPCS2	-0.13119862026432	0.00455603963866681	-0.131959269079921
cg18513123	SPCS2	SPCS2	-0.203099215295709	9.93100739690499e-06	-0.205963000352343
cg06029050	SPCS2	SPCS2	0.15931237876647	0.00055662033273292	0.160681088868428
cg10339200	SPCS2	SPCS2	-0.365092954396335	3.8598567843415e-16	-0.382749600229029
cg01560119	SETDB2	SETDB2	0.148550130481423	0.00129988605287395	0.149657522303059
cg07000831	SETDB2	SETDB2	0.0719003923714677	0.12115251428863	0.0720246784584902
cg25335349	SETDB2	SETDB2	-0.216095627710876	2.5006522739026e-06	-0.219556830926856
cg05754322	SETDB2	SETDB2	-0.20479927920399	8.33250718680444e-06	-0.207736848499811
cg01395456	DESI2	DESI2	0.101454053677973	0.0285341671810137	0.101804305628253
cg23035053	DESI2	DESI2	-0.192750395622273	2.80087215772009e-05	-0.195192128266756
cg15965913	DESI2	DESI2	0.280181514667382	7.47164055031584e-10	0.28787903933589
cg24536044	DESI2	DESI2	-0.0903468783555829	0.0512869919495247	-0.0905939098923552
cg04826576	DESI2	DESI2	0.143225177448155	0.0019384934068255	0.144216758387546
cg19721680	DESI2	DESI2	-0.139885871653927	0.00247399057853258	-0.140809167985402
cg08535515	DESI2	DESI2	0.124892990869902	0.0069463596516251	0.125548507929456
cg12049897	DESI2	DESI2	-0.249073972088813	5.08171849744307e-08	-0.254425292315491
cg15160742	DESI2	DESI2	0.168350534088123	0.000261714422073578	0.169968598065434
cg14093610	PAX3	PAX3	-0.212935061087022	3.52509381578477e-06	-0.216243806103026
cg00926215	PAX3	PAX3	-0.295422464957919	7.72110394550646e-11	-0.304496883289574
cg08022524	PAX3	PAX3	-0.43954764581004	1.95457563354421e-23	-0.471669987685862
cg02245378	PAX3	PAX3	-0.323670552173397	7.95019264555995e-13	-0.335741785843807
cg02635607	COX17	COX17	-0.149476821079599	0.00121092249632276	-0.15060525744927
cg23666291	COX17	COX17	-0.0833431880020504	0.0722676389277076	-0.0835369659222743
cg01427290	COX17	COX17	-0.127557638457867	0.00582509189938481	-0.128256300014508
cg11951446	COX17	COX17	-0.140925584167653	0.00229432083325273	-0.14186978944827
cg24850932	COX17	COX17	-0.105839098517525	0.0223106402617276	-0.106236976344078
cg27575106	COX17	COX17	-0.11751914097292	0.0111208174128945	-0.118064677821966
cg18027227	COX17	COX17	-0.11812429558943	0.0107092646998957	-0.118678351449349
cg12704673	COX17	COX17	-0.115952323699846	0.0122521307691838	-0.11647621384003
cg09568217	NLGN2	NLGN2	0.115799492964849	0.012367743312098	0.11632130308295
cg00061695	NLGN2	NLGN2	0.204207754921487	8.85864506002995e-06	0.207119505885664
cg09711113	NLGN2	NLGN2	0.10960336399717	0.017943044834502	0.110045439418256
cg03169180	NLGN2	NLGN2	-0.122132974604375	0.00830786823947392	-0.122745732149325
cg24171938	NLGN2	NLGN2	-0.0505224017188618	0.276420849352811	-0.0505654540367471
cg15660077	NLGN2	NLGN2	0.0570419716821684	0.219049036726016	0.0571039602121444
cg08870143	NLGN2	NLGN2	0.280348822403596	7.29314518961867e-10	0.288060609118488
cg24149806	NLGN2	NLGN2	-0.11787415662841	0.0108777134065299	-0.118424680417819
cg00819788	NLGN2	NLGN2	-0.217550250247763	2.1314239057586e-06	-0.221083212312948
cg10369169	NLGN2	NLGN2	0.0822761249187188	0.0760074889478407	0.0824625348886883
cg10092265	NLGN2	NLGN2	0.157105126838249	0.000665324641553557	0.158417170016385
cg10106095	PKMYT1	PKMYT1	-0.0184405555556996	0.6913368401659	-0.0184426462443925
cg14005217	PKMYT1	PKMYT1	-0.186567430529596	5.07265359993541e-05	-0.188778435951326
cg02386244	PKMYT1	PKMYT1	-0.0265813554179381	0.567069544582192	-0.0265876185891188
cg01127059	PKMYT1	PKMYT1	-0.100682534511809	0.0297709440660442	-0.10102482417462
cg05097643	PKMYT1	PKMYT1	-0.065017857828794	0.16113749921174	-0.0651097080465728
cg04755561	PKMYT1	PKMYT1	-0.399962664418732	2.5005796090097e-19	-0.423604483863219
cg00319761	PKMYT1	PKMYT1	-0.0448926154203361	0.333552419376579	-0.0449228100050207
cg26229224	PKMYT1	PKMYT1	-0.0657053216713319	0.156745005066813	-0.0658001214577338
cg06103394	PKMYT1	PKMYT1	-0.0403802183642711	0.384462864979486	-0.0404021873450299
cg16761550	PKMYT1	PKMYT1	-0.262634084223379	8.63310922582265e-09	-0.268935549133665
cg26903090	PKMYT1	PKMYT1	0.0748940286042659	0.106383022267583	0.0750345315192562
cg26754214	FAM89B	FAM89B	0.0203826173455946	0.660760000738888	0.0203854407096066
cg14669919	FAM89B	FAM89B	-0.211508173581239	4.10922298788026e-06	-0.214749623267132
cg09763325	FAM89B	FAM89B	-0.0302026531207146	0.515444849993413	-0.0302118417730051
cg04682787	FAM89B	FAM89B	0.0256392252211758	0.580894167531544	0.025644845589522
cg11940518	FAM89B	FAM89B	-0.137830585778855	0.0028674181792862	-0.138713472945003
cg09585333	FAM89B	FAM89B	-0.139050189062458	0.00262760409492217	-0.139956907743924
cg20184045	FAM89B	FAM89B	0.0659622429556657	0.155126864109714	0.0660581611097858
cg25779653	FAM89B	FAM89B	-0.175286204605867	0.000142820548630046	-0.177115281916873
cg20165655	FAM89B	FAM89B	-0.00998674508315075	0.829759085147542	-0.00998707711261781
cg07156219	FAM89B	FAM89B	-0.0379938639234801	0.413204450313455	-0.038012161581671
cg11073926	MED8	MED8	0.0684277619672384	0.140235574217927	0.0685348641298356
cg05704639	MED8	MED8	-0.187337356391121	4.71589275818175e-05	-0.189576246284429
cg14084857	MED8	MED8	0.0812166246759623	0.0798750485304364	0.081395906833712
cg17006436	MED8	MED8	0.0146814724994131	0.751930183979878	0.0146825274782904
cg24476096	MED8	MED8	-0.250196836213558	4.4048861927324e-08	-0.255622781535111
cg16563819	MED8	MED8	0.163302998615721	0.000400812860659137	0.164778325532417
cg09172079	MED8	MED8	0.266513968053139	5.10171253516976e-09	0.273107471928983
cg07458516	MED8	MED8	0.0445333031567294	0.337439894025586	0.0445627779438691
cg17494855	MED8	MED8	0.0499891039504517	0.281528689727778	0.0500308059265136
cg01717331	MED8	MED8	-0.0261443130332437	0.573463057945395	-0.0261502722421575
cg10500219	MED8	MED8	-0.291802311753608	1.34027484900553e-10	-0.300535193875449
cg19322509	MED8	MED8	-0.155404728001223	0.000762142555260802	-0.156674215431308
cg10548277	MED8	MED8	-0.0778618501059819	0.0931829156637254	-0.0780197699193032
cg16045533	MED8	MED8	-0.31313410678805	4.64011589755844e-12	-0.324016469999041
cg24483304	MED8	MED8	0.104215794505417	0.0244618341138971	0.10459556594384
cg08462194	PHF1	PHF1	-0.0781731042209329	0.0918779985340074	-0.0783329301576418
cg20135607	PHF1	PHF1	-0.176091820276279	0.0001329174974289	-0.177946556275266
cg17719126	PHF1	PHF1	-0.0647303078583487	0.16300202372917	-0.0648209427630683
cg21345145	PHF1	PHF1	-0.0153561088247135	0.740930004510475	-0.0153573160372629
cg02776641	PHF1	PHF1	-0.029732911138129	0.522001573543234	-0.0297416775423089
cg09152042	PHF1	PHF1	-0.0415730416566803	0.370565010359085	-0.0415970169996649
cg08665801	PHF1	PHF1	-0.181373405403156	8.23339806955473e-05	-0.18340244605049
cg06818415	PHF1	PHF1	-0.0230138626554637	0.620224369686303	-0.0230179269515372
cg13303256	PHF1	PHF1	0.110744003671976	0.0167762864052121	0.111200094708134
cg06733311	PHF1	PHF1	-0.0992191060150847	0.0322434016692137	-0.0995466279773482
cg03593812	PHF1	PHF1	0.0161839877163142	0.727503153802753	0.0161854009162978
cg13547657	PHF1	PHF1	-0.106088531573062	0.0219950666660377	-0.106489241922166
cg02305757	PHF1	PHF1	0.0588247550278963	0.204962517648064	0.0588927477000239
cg16676655	PHF1	PHF1	-0.052885070178485	0.254551738074195	-0.0529344566086638
cg26673053	PHF1	PHF1	-0.10340600729456	0.0256003779426028	-0.103776956778331
cg03876174	PHF1	PHF1	-0.198279735823785	1.62035065305287e-05	-0.200941252268948
cg23345642	PHF1	PHF1	0.0964068650052641	0.0374891502579067	0.0967072193219204
cg26840590	PHF1	PHF1	-0.101835141731527	0.027939718852596	-0.102189372048222
cg18443095	PHF1	PHF1	-0.0471040865009485	0.310263236834284	-0.0471389710570658
cg06919790	PHF1	PHF1	-0.00787814992613549	0.865315468388424	-0.00787831291864368
cg03139255	PHF1	PHF1	0.0169355683716934	0.715385408574458	0.0169371877667925
cg00491616	PHF1	PHF1	-0.0172167277557857	0.710870391283041	-0.017218429161277
cg20872639	PHF1	PHF1	0.0435661225997338	0.348047566726657	0.0435937169669151
cg03560363	PHF1	PHF1	-0.0757710542848502	0.102336894361212	-0.0759165627778276
cg13528777	PHF1	PHF1	-0.208495617901051	5.66053351185768e-06	-0.211598079159135
cg20133884	PHF1	PHF1	-0.0365230962617864	0.431533475937592	-0.0365393491030624
cg10795189	PHF1	PHF1	-0.045010636326211	0.332281835496467	-0.0450410698726783
cg01097444	PHF1	PHF1	-0.150999435933931	0.00107683726351999	-0.152163033977886
cg11928161	PHF1	PHF1	-0.10410020958155	0.0246216195628761	-0.104478713298411
cg24481891	FAM69A	FAM69A	-0.108956555094768	0.0186356559210304	-0.109390812869968
cg22128645	FAM69A	FAM69A	-0.27043103791148	2.97396335545001e-09	-0.277328812470838
cg17283838	FAM69A	FAM69A	-0.000134893559929439	0.997682841910974	-0.000134893560747644
cg18858378	FAM69A	FAM69A	0.0599854270330838	0.19615157006066	0.06005753031472
cg04107707	PSMB6	PSMB6	0.0760141721361319	0.101237157874606	0.0761610890254164
cg17255878	PSMB6	PSMB6	0.232482851967834	3.87834718113071e-07	0.236812585342347
cg03648786	PSMB6	PSMB6	-0.0384365042726502	0.407779470599853	-0.0384554493156592
cg20693880	PSMB6	PSMB6	-0.147250613669366	0.00143479079134027	-0.148328943258343
cg09188840	PSMB6	PSMB6	-0.106625012243841	0.0213294206680159	-0.107031860580176
cg18960307	PSMB6	PSMB6	-0.219006167523324	1.81446006916594e-06	-0.22261196805548
cg23899285	PSMB6	PSMB6	0.0796574735567281	0.0858548903052765	0.0798266017981636
cg01545575	PSMB6	PSMB6	-0.0163755468046336	0.724408047310389	-0.0163770107877254
cg02473715	PSMB6	PSMB6	-0.326168037999549	5.18010853607318e-13	-0.338534061458893
cg10448562	PSMB6	PSMB6	-0.297222517018284	5.85228063229322e-11	-0.306470207832939
cg02057148	PSMB6	PSMB6	-0.0243786329342024	0.599633949898101	-0.0243834642084803
cg21760034	FBXO45	FBXO45	0.0713308640845941	0.12413534549368	0.0714522141016571
cg14138432	FBXO45	FBXO45	-0.000780053460968579	0.986601102110989	-0.000780053619185151
cg00627788	FBXO45	FBXO45	-0.12252698088747	0.00809997116995376	-0.123145724167851
cg20283971	FBXO45	FBXO45	0.0360556145440644	0.437456262562321	0.0360712509301814
cg09817114	FBXO45	FBXO45	0.132940168585679	0.00404223787846923	0.133731733786442
cg11086568	FBXO45	FBXO45	0.0994931499471009	0.0317674925546006	0.0998234041459086
cg21595543	FBXO45	FBXO45	0.138009888592786	0.00283095571502206	0.138896252592421
cg25628243	FBXO45	FBXO45	-0.0777354672937039	0.0937169830027363	-0.0778926175001402
cg21665057	FBXO45	FBXO45	0.0955934338135561	0.0391352142993428	0.0958862217460481
cg27345282	FBXO45	FBXO45	0.0256571729929931	0.580629342502444	0.0256628051756964
cg20584918	FBXO45	FBXO45	-0.184070470990133	6.41319949548782e-05	-0.186192671681431
cg13310076	FBXO45	FBXO45	-0.170878751783979	0.000210432237373239	-0.172571706468646
cg16833167	AMZ2	AMZ2	0.0570078597536943	0.219325163474612	0.0570697369952064
cg11633191	AMZ2	AMZ2	-0.234296491586791	3.12814864567657e-07	-0.238730707118675
cg26910488	AMZ2	AMZ2	0.147853252692797	0.001370705928594	0.148944994711248
cg17553389	AMZ2	AMZ2	-0.131705866702629	0.0044006172500031	-0.132475434713407
cg26244401	AMZ2	AMZ2	-0.22812717613684	6.45303047792043e-07	-0.232212933224161
cg01007665	AMZ2	AMZ2	0.189492696509869	3.83906443156557e-05	0.191810918765235
cg15412291	AMZ2	AMZ2	-0.294794025936974	8.50159244570897e-11	-0.303808493109972
cg08172935	AMZ2	AMZ2	-0.129196058495394	0.00521919486952275	-0.129922175095901
cg08078772	AMZ2	AMZ2	0.076974440214598	0.0969848525952111	0.0771270091444357
cg18975678	AMZ2	AMZ2	-0.0274627028286854	0.554280827714163	-0.0274696100785421
cg03409623	AMZ2	AMZ2	-0.219961284487601	1.63161149124331e-06	-0.223615424736529
cg05396182	MTF2	MTF2	-0.0978080632254465	0.0347913528197558	-0.098121756670934
cg05962718	MTF2	MTF2	-0.339788832683838	4.66904203546197e-14	-0.353853779325548
cg26054395	MTF2	MTF2	-0.233473018748684	3.44961707636146e-07	-0.237859581857344
cg16813892	MTF2	MTF2	0.10191781106624	0.0278121793207842	0.102272908391357
cg23992808	MTF2	MTF2	-0.107115235119234	0.0207365312902592	-0.107527747096612
cg09936581	MTF2	MTF2	0.126567246003374	0.00622130079853517	0.127249655330586
cg22801127	MTF2	MTF2	-0.0277482179408388	0.550168260377602	-0.0277553429386381
cg10583097	RBM15B	RBM15B	-0.00789097107413943	0.865098370736167	-0.00789113486374058
cg17384114	RBM15B	RBM15B	-0.0686708080493982	0.138829107214237	-0.0687790576798042
cg07620844	RBM15B	RBM15B	-0.0624131600066584	0.178622649126081	-0.0624943914094724
cg07867023	RBM15B	RBM15B	-0.022799790714422	0.6234817573892	-0.0228037426222944
cg01439568	RBM15B	RBM15B	-0.146551401941751	0.00151258922974387	-0.147614309775595
cg06364023	RBM15B	RBM15B	-0.0515671430897779	0.266597974260988	-0.051612924760961
cg06216732	RBM15B	RBM15B	0.0482005771821466	0.299122710030837	0.0482379573667458
cg15035459	RBM15B	RBM15B	-0.0320549406957379	0.49001181453387	-0.0320659264919895
cg05106206	RBM15B	RBM15B	-0.00803831029140022	0.862604240890134	-0.00803848342839801
cg03037622	RBM15B	RBM15B	-0.0182474234611648	0.694406250885225	-0.0182494491380532
cg03604819	NCAPG	NCAPG	0.0767807645539654	0.0978308358972666	0.0769321820225973
cg12806521	NOP2	NOP2	-0.102333184054935	0.0271789019148489	-0.102692659226897
cg22225892	NOP2	NOP2	0.0176462321018392	0.703992692336253	0.0176480640612969
cg16579101	NOP2	NOP2	-0.0509645883989009	0.272233699903647	-0.0510087822509187
cg17975492	NOP2	NOP2	-0.000549873793965417	0.990554651892184	-0.00054987384938554
cg03920169	NOP2	NOP2	-0.16218292532198	0.000439848305503775	-0.163627779583268
cg00383178	NOP2	NOP2	0.0311136668067494	0.502851342060211	0.03112371261051
cg00506612	NOP2	NOP2	0.128363894877906	0.0055194525329533	0.129075977852236
cg25626318	NOP2	NOP2	0.069194781083088	0.135833827569349	0.0693055323915391
cg03005603	ZNF880	ZNF880	-0.421176746564785	1.83986345188307e-21	-0.44912166649005
cg27089125	ZNF880	ZNF880	-0.17020866972439	0.000223021082132719	-0.171881551102775
cg09313053	ZNF880	ZNF880	-0.186616249430607	5.04929557098017e-05	-0.188829015868791
cg02627531	ZNF880	ZNF880	-0.127153475034471	0.00598395536779551	-0.127845473205258
cg17650272	ZNF880	ZNF880	-0.344948581765568	1.81825503266033e-14	-0.359698664229567
cg14224937	ZNF880	ZNF880	-0.152190224382503	0.000981664042858042	-0.153381831766913
cg27558396	ZNF880	ZNF880	-0.174893343200303	0.000147897220344671	-0.176709995882943
cg22632069	ZNF880	ZNF880	-0.0965248307613717	0.0372553807197492	-0.0968262931386013
cg13393110	ZNF880	ZNF880	-0.205613651988749	7.65666644969749e-06	-0.208587021880313
cg05134500	MFI2	MFI2	-0.154410634680317	0.000824625063142998	-0.155655680865881
cg20744464	MFI2	MFI2	-0.287232972162977	2.65892218746356e-10	-0.295547796461126
cg21662156	MFI2	MFI2	-0.170728776741377	0.000213190637823109	-0.172417224582626
cg22668421	MFI2	MFI2	0.361731386373071	7.48343940091939e-16	0.378876514018085
cg00477017	MFI2	MFI2	-0.0990349182763359	0.0325666757477773	-0.0993606124185657
cg01627785	MFI2	MFI2	-0.328588181464253	3.4073892640935e-13	-0.341244726248114
cg00637433	MFI2	MFI2	-0.628232231704577	1.54933032453745e-52	-0.738490402151037
cg09681814	MFI2	MFI2	0.133047865318784	0.00401225650434415	0.133841369694762
cg03784611	MFI2	MFI2	-0.391634303963903	1.56534147018026e-18	-0.41372895940641
cg24058120	MFI2	MFI2	-0.202914117590169	1.01216942070367e-05	-0.205769946570331
cg17172980	MFI2	MFI2	-0.295261138533382	7.91452705310327e-11	-0.304320140127629
cg06069457	MFI2	MFI2	-0.528554913979682	6.79526009296268e-35	-0.588137719329958
cg16446585	MFI2	MFI2	-0.564635460318976	1.35666716342148e-40	-0.639612220369187
cg02470858	MFI2	MFI2	-0.113725133031455	0.0140349075575121	-0.11421925759994
cg20860638	MFI2	MFI2	-0.172073216169958	0.00018962623187251	-0.17380235708551
cg21856334	MFI2	MFI2	-0.470584556698504	4.68905127067369e-27	-0.510820898824797
cg10670430	MFI2	MFI2	-0.52942521191787	5.04292230185868e-35	-0.589346182222293
cg23224619	DGKD	DGKD	-0.0242448559543554	0.601638571361383	-0.0242496081113255
cg01192572	DGKD	DGKD	-0.153140176858085	0.000911373982604629	-0.15435445287549
cg03825255	DGKD	DGKD	0.027401903513466	0.555158515074865	0.027408764975462
cg04956471	DGKD	DGKD	-0.161025880902002	0.000483864998750309	-0.162439707341946
cg18520994	DGKD	DGKD	-0.0823025219343263	0.0759131099162796	-0.082489111871205
cg06191495	DGKD	DGKD	-0.110329747462672	0.0171921166834944	-0.110780714335025
cg18400889	DGKD	DGKD	-0.0171081888934924	0.71261218225006	-0.0171098583193381
cg24933152	DGKD	DGKD	-0.0525561852600937	0.257521895852576	-0.0526046550154173
cg18068854	DGKD	DGKD	-0.129794024454324	0.00501260889291619	-0.130530339359913
cg08436419	DGKD	DGKD	0.0028647059679712	0.950822013168709	0.00286471380445143
cg24337644	DGKD	DGKD	-0.118925668105981	0.0101850662715445	-0.119491142236098
cg12505415	DGKD	DGKD	-0.0898226251202508	0.0526580364420751	-0.0900653673833205
cg00223703	DGKD	DGKD	-0.0273518444477551	0.555881665944656	-0.0273586683626685
cg26139949	DGKD	DGKD	-0.0672985021515643	0.146914095411356	-0.0674003794302102
cg14507634	DGKD	DGKD	-0.0701321848172122	0.13059959723522	-0.0702475076024928
cg02442900	DGKD	DGKD	-0.00147400012145256	0.974684300877886	-0.00147400118896238
cg25107522	DGKD	DGKD	-0.117567026883695	0.0110877483747711	-0.118113234611642
cg01230160	DGKD	DGKD	-0.00112410460205789	0.98069234506669	-0.00112410507553527
cg08354835	DGKD	DGKD	-0.0409479154403355	0.377809296328935	-0.0409708247160819
cg06975592	TMCO1	TMCO1	0.196549746453619	1.92614747958497e-05	0.199141106033793
cg15781625	TMCO1	TMCO1	-0.0221734049895348	0.633055109260117	-0.0221770399865151
cg16815379	TMCO1	TMCO1	-0.19323170307117	2.6721923380142e-05	-0.19569205580031
cg03036064	TMCO1	TMCO1	0.195746925284186	2.08597889600985e-05	0.198306160995264
cg18647881	TMCO1	TMCO1	-0.122198485579913	0.00827297498709744	-0.122812235654159
cg27447557	TMCO1	TMCO1	-0.0830995024972579	0.0731081997153343	-0.0832915809307474
cg19259013	TMCO1	TMCO1	-0.115595905767556	0.0125232474368892	-0.116114953700817
cg18964732	TMCO1	TMCO1	-0.0632005211847835	0.173194890604084	-0.0632848708326502
cg02235760	RAB5C	RAB5C	-0.203471421149674	9.55786619563629e-06	-0.20635125062318
cg25735425	RAB5C	RAB5C	-0.293007248056929	1.11647356202053e-10	-0.301852785186577
cg02758586	RAB5C	RAB5C	-0.127394767099325	0.00588864969924483	-0.128090738246671
cg14265670	UPP1	UPP1	-0.0154883738482757	0.738779472272687	-0.0154896125271467
cg02399030	UPP1	UPP1	-0.00297763569007089	0.948885960646831	-0.00297764449033568
cg10317717	UPP1	UPP1	-0.399811535456344	2.58640828686326e-19	-0.423424587771481
cg22860780	UPP1	UPP1	-0.00226790152932396	0.961058087203746	-0.00226790541756036
cg22622937	UPP1	UPP1	-0.361451313623593	7.90504716438853e-16	-0.378554314183137
cg00524288	UPP1	UPP1	0.0202475920543494	0.662868474794213	0.0202503596697408
cg04926556	UPP1	UPP1	-0.0631779167108808	0.173348984012656	-0.0632621757400243
cg11494773	UPP1	UPP1	-0.170937570389609	0.000209359571464078	-0.172632294836248
cg07703017	UPP1	UPP1	0.0788657633090147	0.0890265732044618	0.0790298862185131
cg07087130	UPP1	UPP1	-0.428929012180686	2.7963782841272e-22	-0.458583488135737
cg10213875	UPP1	UPP1	-0.392993884281776	1.16441625076507e-18	-0.415335858560665
cg21484940	UPP1	UPP1	-0.387272739147299	4.00719073395203e-18	-0.408587564435806
cg02006203	UPP1	UPP1	-0.0433277245747634	0.350694343456843	-0.0433548680812482
cg16270885	UPP1	UPP1	-0.495948354735177	2.66108468948516e-30	-0.543918451058768
cg14983135	UPP1	UPP1	-0.399705431401298	2.64839346292498e-19	-0.423298302458833
cg02624558	KDM5B	KDM5B	-0.121530395846439	0.00863502782962999	-0.122134074562968
cg00528052	KDM5B	KDM5B	-0.059421533334323	0.200397049635782	-0.0594916194081843
cg10540110	KDM5B	KDM5B	-0.356070520464474	2.24227074480509e-15	-0.372378628554376
cg13253785	KDM5B	KDM5B	-0.0701271450916706	0.130627314723335	-0.0702424429682193
cg00571448	KDM5B	KDM5B	0.172585828866974	0.000181302090537529	0.17433065902347
cg27531483	KDM5B	KDM5B	-0.318041128606187	2.05807078309047e-12	-0.329466284870267
cg11221497	KDM5B	KDM5B	-0.151118235226219	0.00106697374712312	-0.152284607427126
cg14560895	KDM5B	KDM5B	-0.221230563867448	1.41577194542471e-06	-0.224949630187304
cg24354901	KDM5B	KDM5B	0.0174215849571436	0.707587023248973	0.017423347829358
cg04504182	KDM5B	KDM5B	-0.0477363270585323	0.303806668110226	-0.0477726365443279
cg09889216	KDM5B	KDM5B	-0.112481567799382	0.0151265064103847	-0.112959577911132
cg08915090	KDM5B	KDM5B	0.139820734685405	0.00248566288336656	0.140742731590976
cg23264525	STPG1	STPG1	-0.238329211733651	1.92737295621236e-07	-0.243001957098876
cg16261730	STPG1	STPG1	0.18142419375412	8.19502328486467e-05	0.183454962482197
cg00933788	STPG1	STPG1	0.0685172537783573	0.139716434691556	0.0686247774984358
cg02439438	STPG1	STPG1	-0.222782285738863	1.18894376618182e-06	-0.226581796809969
cg21298759	STPG1	STPG1	0.0263817321490472	0.569985616771048	0.0263878552310809
cg13980834	STPG1	STPG1	-0.0477411363494811	0.303757898122645	-0.0477774568206215
cg19510127	STPG1	STPG1	-0.229493098803854	5.50670299512914e-07	-0.23365431856692
cg08936898	STPG1	STPG1	0.122124530061892	0.00831237561017564	0.122737159745737
cg06544731	STPG1	STPG1	0.10128037537234	0.0288086649383403	0.101628824195659
cg22436963	STPG1	STPG1	0.049360583380566	0.287630032715229	0.049400730567968
cg19362328	STPG1	STPG1	-0.239801529016554	1.61151970884862e-07	-0.244563521662651
cg26955337	FHOD1	FHOD1	-0.0306331069505834	0.509474152348513	-0.030642694254701
cg06179039	FHOD1	FHOD1	-0.112839043214445	0.01480532891942	-0.113321648859435
cg27062617	FHOD1	FHOD1	-0.0527474220301958	0.255791934632291	-0.0527964234088337
cg07701282	FHOD1	FHOD1	-0.0176894087298356	0.703302622303014	-0.017691254171174
cg16503279	FHOD1	FHOD1	0.0420861641859127	0.364683390594002	0.0421110389324908
cg04044983	FHOD1	FHOD1	-0.265692586024847	5.70671861645158e-09	-0.272223494554602
cg26719831	FHOD1	FHOD1	-0.303191904803835	2.30232583865288e-11	-0.313030901169491
cg27091763	FHOD1	FHOD1	-0.0957415218210228	0.0388310668663562	-0.0960356776137006
cg00630080	FHOD1	FHOD1	-0.149725323897575	0.00118803807088953	-0.150859449202346
cg11530914	FHOD1	FHOD1	-0.00329453808361415	0.943454669742298	-0.00329455000330992
cg07125771	FHOD1	FHOD1	0.0704670751232163	0.128767939121274	0.0705840611722267
cg03748434	FHOD1	FHOD1	-0.201234994341898	1.20181956475351e-05	-0.204019338280943
cg15157828	FHOD1	FHOD1	-0.140258313506791	0.00240820510471716	-0.141189063464922
cg03051411	FHOD1	FHOD1	-0.258405965775235	1.51689536279859e-08	-0.264399561370397
cg07976860	FHOD1	FHOD1	-0.0890400157760666	0.0547614590293041	-0.0892764482530747
cg11261264	PTPRH	PTPRH	0.129683810296145	0.00505012267363118	0.130418238295571
cg26610167	PTPRH	PTPRH	0.0645242486018745	0.164348090245915	0.0646140192515037
cg19025031	PTPRH	PTPRH	-0.086612328947128	0.0617350768375811	-0.0868298888040942
cg04476414	PCMTD1	PCMTD1	0.0207301941725413	0.655344813978198	0.0207331644762377
cg03835158	PCMTD1	PCMTD1	0.0173893351501793	0.70810355259778	0.0173910882493497
cg21285555	PCMTD1	PCMTD1	-0.0783309305386458	0.0912219339088158	-0.0784917288602098
cg27631621	PCMTD1	PCMTD1	-0.110992753147664	0.0165308436153529	-0.111451939814188
cg10444530	PCMTD1	PCMTD1	0.0439689444949652	0.343604149499563	0.0439973119930643
cg19883017	PCMTD1	PCMTD1	-0.263779187321335	7.39817124174864e-09	-0.270165887456028
cg09634226	PCMTD1	PCMTD1	0.145668284962251	0.00161638248874663	0.146711928621529
cg25335107	PCMTD1	PCMTD1	0.149763645778077	0.00118454469681444	0.150898650100698
cg08188400	MAP2K7	MAP2K7	0.0165039720661912	0.722335530178644	0.0165054707677851
cg03250779	MAP2K7	MAP2K7	-0.178578891933002	0.000106260302700025	-0.180514381969625
cg05512505	MAP2K7	MAP2K7	-0.134355196588836	0.00366402453408862	-0.135172496523685
cg01660035	MAP2K7	MAP2K7	0.00755989564740362	0.870707603774427	0.00756003967345049
cg14820798	ZNF767P	ZNF767P	-0.0301089810251471	0.516748928006147	-0.0301180844169323
cg00601368	ZNF767P	ZNF767P	-0.0709949134577076	0.125921440480007	-0.0711145535053462
cg04822759	ZNF767P	ZNF767P	-0.19245863159908	2.8817124878227e-05	-0.194889123837685
cg03545047	ZNF767P	ZNF767P	-0.0606831663659459	0.190989787002337	-0.060757818886024
cg03986384	AP5S1	AP5S1	-0.0213906248274652	0.64510522345021	-0.0213938882131865
cg24917645	AP5S1	AP5S1	-0.00323828637439983	0.944418566162574	-0.00323829769389963
cg22367350	AP5S1	AP5S1	-0.175734456673011	0.000137228043336562	-0.17757778074951
cg18830052	AP5S1	AP5S1	0.110567059302108	0.0169528140103917	0.111020956858101
cg25456386	AP5S1	AP5S1	-0.00650543195669113	0.888614722659417	-0.00650552373038019
cg13309628	AP5S1	AP5S1	0.0532021756194656	0.251710533503797	0.0532524567858836
cg09225139	AP5S1	AP5S1	0.070630695666834	0.127880294419251	0.0707485001529069
cg17891715	VRK3	VRK3	-0.0104313481494906	0.822303540659797	-0.0104317265297074
cg11846529	VRK3	VRK3	-0.188005562201582	4.42561625824779e-05	-0.190268845881612
cg07354053	VRK3	VRK3	0.0338575151167626	0.465922502249146	0.0338704613324315
cg01879458	VRK3	VRK3	-0.0128757246619431	0.781616024824876	-0.012876436263666
cg02396668	VRK3	VRK3	0.136344152393209	0.00318655014355461	0.137198569764232
cg24484103	VRK3	VRK3	-0.171674011946915	0.000196355332528722	-0.173391001181116
cg21580058	VRK3	VRK3	-0.160587738798048	0.000501576566521316	-0.161989934633996
cg07583667	VRK3	VRK3	-0.0739026123030986	0.111107981339739	-0.0740375969922573
cg22238717	VRK3	VRK3	0.192928620180612	2.75255306762272e-05	0.195377236458001
cg13537276	VRK3	VRK3	-0.152983235459693	0.000922656405061242	-0.154193746465297
cg05563107	VRK3	VRK3	0.200944306553212	1.23790877888703e-05	0.203716400583706
cg05034603	SLC2A1	SLC2A1	-0.000721249144411367	0.9876110935807	-0.000721249269476091
cg26681016	SLC2A1	SLC2A1	-0.0611210943653227	0.187801365214044	-0.0611973772450256
cg22176566	SLC2A1	SLC2A1	0.0135575346654402	0.770367407576666	0.0135583654125048
cg04287330	SLC2A1	SLC2A1	-0.0779893648090393	0.0926465352504076	-0.0781480636735702
cg03106288	SLC2A1	SLC2A1	-0.000582089798264274	0.990001295939437	-0.00058208986400713
cg08159148	SLC2A1	SLC2A1	-0.0197629652118804	0.670457969945679	-0.0197655387870335
cg20282814	SLC2A1	SLC2A1	-0.201118963526243	1.21610323373213e-05	-0.203898413370779
cg01907688	SLC2A1	SLC2A1	-0.0585367579547865	0.207192520467068	-0.0586037555001363
cg05802386	SLC2A1	SLC2A1	-0.183504373328529	6.76048464065489e-05	-0.185606783995212
cg07499643	SLC2A1	SLC2A1	0.0123948911620921	0.789576521997974	0.0123955259767323
cg03128534	SLC2A1	SLC2A1	-0.0183489196635856	0.692792564916316	-0.0183509793352147
cg07803811	SLC2A1	SLC2A1	-0.0419891117057204	0.365791364361866	-0.0420138146410506
cg26188818	SLC2A1	SLC2A1	0.0989959671117397	0.0326353935727405	0.0993212755934537
cg13790796	SLC2A1	SLC2A1	-0.0168749529179558	0.716360114213163	-0.0168765549849246
cg20345840	SLC2A1	SLC2A1	0.0549041259849902	0.236838300849581	0.0549593948026617
cg21877974	SLC2A1	SLC2A1	0.00735682121366316	0.874151413850726	0.00735695394193951
cg25619106	GLYCTK	GLYCTK	-0.138927916981191	0.00265079474620682	-0.139832227086937
cg18560264	GLYCTK	GLYCTK	-0.133331469245624	0.00393426511647372	-0.134130095470966
cg25198967	GLYCTK	GLYCTK	-0.195805621664158	2.07387930092811e-05	-0.198367196775976
cg17386185	GLYCTK	GLYCTK	-0.049019050764317	0.290982466513171	-0.0490583695586155
cg27395450	GLYCTK	GLYCTK	-0.159388957320288	0.000553163081970235	-0.160759662616835
cg12147921	GLYCTK	GLYCTK	-0.0836013674953205	0.0713857058930312	-0.0837969569359151
cg08841910	GLYCTK	GLYCTK	-0.0841036016295099	0.0696952791271634	-0.0843027474148633
cg19504245	TNNT1	TNNT1	0.277115608405589	1.16039477997067e-09	0.284555037393496
cg24699670	TNNT1	TNNT1	0.238299869514182	1.934237180872e-07	0.24297084807934
cg09256310	TNNT1	TNNT1	-0.0444727019785934	0.338098399829473	-0.0445020565058597
cg07189381	TNNT1	TNNT1	0.31939503647557	1.64020953333474e-12	0.330973274959986
cg10218876	TNNT1	TNNT1	0.218206648591255	1.98246062457613e-06	0.221772323495987
cg18649823	TNNT1	TNNT1	0.218213277050585	1.98100846608473e-06	0.221779283353
cg20251008	PPOX	PPOX	-0.244660993325911	8.85281335144717e-08	-0.249725906684234
cg24642196	PPOX	PPOX	-0.187922892411412	4.46059080191035e-05	-0.190183148350412
cg01531388	PPOX	PPOX	-0.0101716720251519	0.826656150021966	-0.0101720228438653
cg07835668	PPOX	PPOX	-0.154088315895942	0.00084587966189573	-0.155325506266948
cg20803370	PPOX	PPOX	-0.115101418421371	0.0129081540302942	-0.115613798314165
cg22851252	PPOX	PPOX	0.1695694491777	0.000235683864694198	0.171223332843054
cg00397740	PPOX	PPOX	0.079602098526377	0.0860737276707695	0.0797708733994369
cg24453429	PPOX	PPOX	0.148800725953945	0.00127525342571488	0.149913782244935
cg05938177	PPOX	PPOX	0.135763108204468	0.00331983291869726	0.136606567241411
cg13687313	PPOX	PPOX	-0.123339105346351	0.00768603947167414	-0.12397031025943
cg17135941	PPOX	PPOX	-0.0504603004929032	0.277012383815268	-0.0505031940867126
cg20994950	PPOX	PPOX	-0.201858454801067	1.12776258712408e-05	-0.204669196717695
cg25940513	H6PD	H6PD	-0.0343758276911414	0.459119224495198	-0.0343893779100143
cg27266479	H6PD	H6PD	-0.00208579240850112	0.964182878992824	-0.00208579543327651
cg25284492	H6PD	H6PD	-0.0377529788493887	0.416174542721954	-0.0377709304854756
cg24108194	H6PD	H6PD	-0.0821887319740257	0.07632063190126	-0.0823745469543667
cg24680141	H6PD	H6PD	0.0894852412467457	0.0535564217248162	0.0897252496991294
cg02276314	H6PD	H6PD	-0.182358737598977	7.51827975793982e-05	-0.18442148326911
cg14418802	H6PD	H6PD	-0.123028028179717	0.00784230548865689	-0.123654440014627
cg09122657	H6PD	H6PD	-0.0263567521724547	0.570351022378372	-0.0263628578729008
cg00911719	RCOR1	RCOR1	-0.0502831463904094	0.278704556593371	-0.0503255893453706
cg19759454	RCOR1	RCOR1	-0.0707553496383948	0.127207232968241	-0.0708737802121618
cg13755373	RCOR1	RCOR1	-0.0707450146740612	0.127262931307588	-0.070863393254997
cg09556292	RCOR1	RCOR1	0.145167707663769	0.00167807812951108	0.146200537227722
cg11029736	RCOR1	RCOR1	-0.116407470695863	0.011913457705004	-0.116937588371066
cg17773636	RCOR1	RCOR1	0.0366706824270084	0.429673291331694	0.0366871332005707
cg19062112	RCOR1	RCOR1	-0.047895452666777	0.302195761612221	-0.0479321268049567
cg15104723	RCOR1	RCOR1	0.116332080536596	0.0119689770139841	0.116861163268782
cg01556091	RPS6KB1	RPS6KB1	-0.162077151439332	0.000443711850004393	-0.163519150253727
cg18664336	RPS6KB1	RPS6KB1	-0.108490899055122	0.0191486143957869	-0.108919586526024
cg06579829	RPS6KB1	RPS6KB1	0.0491498317813311	0.289695657599314	0.0491894664251883
cg03923774	RPS6KB1	RPS6KB1	0.149327790141788	0.00122484061533348	0.15045282403751
cg03637975	RPS6KB1	RPS6KB1	-0.0629519455435144	0.174895034170463	-0.0630353022537284
cg01883591	RPS6KB1	RPS6KB1	-0.350283647609481	6.73168210902639e-15	-0.365767035996403
cg22134634	RPS6KB1	RPS6KB1	0.155582189582253	0.000751460377325778	0.156856074029276
cg02443583	RPS6KB1	RPS6KB1	-0.243626120422844	1.00681237243614e-07	-0.248625439103393
cg04863850	RPS6KB1	RPS6KB1	0.0643748263878401	0.16532938761986	0.0644639737869048
cg13276752	RPS6KB1	RPS6KB1	0.0787507852316172	0.089494915041326	0.0789141895787629
cg25846074	GLI3	GLI3	-0.0411987306723176	0.374892333615212	-0.0412220637942036
cg10055593	GLI3	GLI3	-0.270364217774474	3.00168757912502e-09	-0.277256721404325
cg02709068	GLI3	GLI3	0.00232062391180548	0.960153538405923	0.00232062807756732
cg15078211	GLI3	GLI3	0.0253053953677322	0.585830173167248	0.0253107989906432
cg00560277	GLI3	GLI3	0.128150068853558	0.00559907239887219	0.12885857559169
cg15751116	GLI3	GLI3	0.189152010701644	3.96655333583117e-05	0.191457567811244
cg04682916	GLI3	GLI3	-0.0313208044716234	0.5000107369216	-0.0313310523319628
cg12853563	GLI3	GLI3	0.126638174510046	0.00619214170291652	0.127321739215548
cg07191743	GLI3	GLI3	-0.103754773138876	0.0251045365558947	-0.104129505080884
cg16216907	GLI3	GLI3	0.228323352106221	6.30809922206766e-07	0.232419888844387
cg09405612	GLI3	GLI3	-0.0854672638299874	0.0652700893088428	-0.0856762835947868
cg11749583	GLI3	GLI3	-0.211681439011763	4.03364913544831e-06	-0.214931009801796
cg06403244	GLI3	GLI3	-0.105197326467941	0.0231406835146441	-0.10558797826615
cg16524701	GLI3	GLI3	-0.227406585287713	7.01333797723109e-07	-0.23145291425963
cg04131524	GLI3	GLI3	-0.127976154018734	0.00566459108270387	-0.128681760968184
cg10569039	GLI3	GLI3	-0.0440124399771449	0.343126532434611	-0.0440408918100849
cg03366925	GLI3	GLI3	-0.107836275702249	0.0198905209284076	-0.10825721381044
cg06500654	GLI3	GLI3	-0.151866689017357	0.00100672350403459	-0.153050641718384
cg24079811	GLI3	GLI3	-0.364299692925452	4.51573100320217e-16	-0.381834646749312
cg05353415	GLI3	GLI3	0.0692381117732809	0.135588372949489	0.0693490716748076
cg23367392	GLI3	GLI3	0.202330946706264	1.07455261832018e-05	0.205161807995481
cg19208079	GLI3	GLI3	0.0262334845114483	0.572155801880712	0.0262395049214056
cg19603847	GLI3	GLI3	-0.119279268929664	0.00996109811924862	-0.119849831209583
cg17530977	GLI3	GLI3	-0.131461304701647	0.00447494393284486	-0.132226563698611
cg10950272	GLI3	GLI3	0.0352193289930427	0.448167122063471	0.035233901872193
cg14576436	KCNE4	KCNE4	-0.267959656843591	4.18457310608984e-09	-0.274664346038674
cg09835085	KCNE4	KCNE4	-0.158855451940413	0.000577669394795284	-0.160212298018877
cg17526887	KCNE4	KCNE4	-0.246876856375479	6.7082557412734e-08	-0.252084218560239
cg24742614	KCNE4	KCNE4	-0.248878072775835	5.20966657903475e-08	-0.254216446868796
cg00694520	KCNE4	KCNE4	-0.161735650180446	0.000456402272219897	-0.163168456003287
cg21561492	KCNE4	KCNE4	-0.125573967301001	0.00664278846721595	-0.126240334600202
cg08586500	KCNE4	KCNE4	-0.131795834034537	0.0043735564462318	-0.13256699131104
cg02831419	KCNE4	KCNE4	-0.150541963057306	0.00111561010252413	-0.151694920017625
cg11975793	KCNE4	KCNE4	-0.228055314146262	6.50691703913698e-07	-0.232137127388223
cg26283893	HOXC13	HOXC13	-0.1108098364889	0.0167110203764735	-0.111266745431166
cg03972398	HOXC13	HOXC13	-0.178575513648721	0.000106292832942337	-0.180510892403725
cg09106624	HOXC13	HOXC13	-0.171041295620418	0.000207480412844571	-0.17273914405916
cg11255394	HOXC13	HOXC13	-0.1517861464592	0.00101305303341245	-0.152968198745688
cg15611413	HOXC13	HOXC13	0.0784479094331505	0.0907380936672675	0.0786094310230094
cg01839657	HOXC13	HOXC13	-0.0198343323571054	0.66933819496805	-0.0198369339182158
cg07892422	HOXC13	HOXC13	-0.15085099924989	0.00108927961039506	-0.152011137327646
cg25936147	HOXC13	HOXC13	-0.0574208317768969	0.21599898572714	-0.0574840653204251
cg24094550	HOXC13	HOXC13	0.0700230157433572	0.131201023913988	0.0701377997676048
cg16856286	HOXC13	HOXC13	-0.125557911818141	0.00664980670922274	-0.126224021918467
cg11466369	HOXC13	HOXC13	-0.189711795018659	3.75913399586324e-05	-0.192038187356285
cg25671500	HOXC13	HOXC13	-0.149115541914805	0.00124491698251549	-0.150235742021461
cg19977966	HOXC13	HOXC13	-0.172143907606315	0.000188457388131594	-0.173875206417991
cg10961753	HOXC13	HOXC13	-0.142195523393508	0.0020910595420967	-0.143165698081543
cg06710769	FAM217B	FAM217B	-0.128726713714422	0.00538668157526891	-0.12944489260175
cg00125414	FAM217B	FAM217B	-0.0236204914843214	0.61103413070559	-0.0236248857969566
cg05294344	FAM217B	FAM217B	0.220950842217511	1.46084825334518e-06	0.224655532728042
cg20800536	FAM217B	FAM217B	-0.06178097787983	0.183071171462152	-0.061859762101394
cg01166994	FAM217B	FAM217B	-0.279277859189886	8.51162833455002e-10	-0.286898671242397
cg14157042	FAM217B	FAM217B	0.122837645941731	0.00793933539896797	0.123461136479747
cg02884024	FAM217B	FAM217B	-0.0599059291883877	0.196746088774397	-0.0599777457654541
cg14536096	FAM217B	FAM217B	-0.0140777787657329	0.761816463215189	-0.0140787088724898
cg22078976	FAM217B	FAM217B	-0.114742624443481	0.0131939318281174	-0.115250202293704
cg04825263	FAM217B	FAM217B	-0.214120509852379	3.10100768357796e-06	-0.217485886602998
cg08966023	FAM217B	FAM217B	0.140897906567991	0.00229894512101308	0.141841551145477
cg02009255	FAM217B	FAM217B	-0.156559881268265	0.000695052696001172	-0.157858175150651
cg26690949	FAM217B	FAM217B	-0.0288119329403457	0.534979635810175	-0.0288199094393889
cg02801359	FAM217B	FAM217B	-0.0771372338614781	0.0962782826266462	-0.0772907751691656
cg04417556	LAMTOR4	LAMTOR4	-0.291121026315725	1.48556498348499e-10	-0.299790660345823
cg00867475	LAMTOR4	LAMTOR4	-0.0619669040296649	0.181754439450431	-0.0620464027840844
cg06598760	LAMTOR4	LAMTOR4	0.0858859567842433	0.0639586863173309	0.0860980726904632
cg03603286	LAMTOR4	LAMTOR4	0.0802098309474426	0.0836964637318553	0.0803825111241761
cg10603443	LAMTOR4	LAMTOR4	0.0758470950401048	0.101991912554531	0.0759930430665477
cg13334819	LAMTOR4	LAMTOR4	-0.0670903866963304	0.148170937745804	-0.0671913200515954
cg03712341	PHYKPL	PHYKPL	-0.0460074350215472	0.321675081048338	-0.046039937378258
cg18042806	PHYKPL	PHYKPL	-0.351143451889292	5.72540193461067e-15	-0.366747428662523
cg20703240	PHYKPL	PHYKPL	-0.0461921210754009	0.319734333865074	-0.0462250167614107
cg07051140	PHYKPL	PHYKPL	-0.0399479348796531	0.389576948837169	-0.0399692053874598
cg23977063	PHYKPL	PHYKPL	-0.0711305786099091	0.125197783972496	-0.0712509072323387
cg16253338	PHYKPL	PHYKPL	-0.0768492101939927	0.0975311935190854	-0.0770010339262209
cg08276690	PHYKPL	PHYKPL	-0.111550695862597	0.0159917220068334	-0.112016877259113
cg01050965	PHYKPL	PHYKPL	0.134323946653879	0.00367201834601108	0.135140672252264
cg00106739	PHYKPL	PHYKPL	-0.00202329383320379	0.9652554144707	-0.00202329659414201
cg24495982	PHLDA2	PHLDA2	-0.056690798673796	0.221903609184384	-0.0567516478975573
cg02011054	PHLDA2	PHLDA2	0.015768532342368	0.734231039636711	0.0157698394680966
cg18140683	PHLDA2	PHLDA2	-0.0437334256754954	0.346197689973697	-0.0437613394145865
cg14415214	PHLDA2	PHLDA2	-0.0735447241094028	0.112853637324004	-0.0736777529779153
cg05167973	PHLDA2	PHLDA2	-0.358708046594364	1.34839756178147e-15	-0.375402371364049
cg14608199	PHLDA2	PHLDA2	-0.144779851399944	0.00172735763542104	-0.145804354223111
cg21259253	PHLDA2	PHLDA2	-0.149061931083829	0.00125003567328482	-0.150180912469266
cg06286274	PHLDA2	PHLDA2	-0.0569677657712826	0.219650031651208	-0.0570295123788909
cg04720330	PHLDA2	PHLDA2	-0.281666442554375	6.0251539740604e-10	-0.289491196276307
cg25555424	PHLDA2	PHLDA2	-0.03875132406722	0.403946930070059	-0.0387707387333498
cg16112844	PHLDA2	PHLDA2	-0.0331296677640798	0.475569601023018	-0.0331417965161854
cg01505590	PHLDA2	PHLDA2	-0.035811654670658	0.440565551871694	-0.035826975640929
cg04964702	CBL	CBL	-0.195159273089584	2.21086672661583e-05	-0.197695167665665
cg22223602	CBL	CBL	-0.131991830411442	0.00431512359477173	-0.13276645760081
cg10974104	CBL	CBL	-0.074177768649761	0.109780365875506	-0.0743142700485107
cg25407972	CBL	CBL	-0.0813457600560334	0.0793952921418302	-0.0815259010378677
cg09376352	CBL	CBL	-0.271976359649243	2.3978988070808e-09	-0.278996818933609
cg06018072	CLN6	CLN6	0.0360408188846264	0.437644475186232	0.0360564360191524
cg14610746	CLN6	CLN6	-0.00786260361848585	0.865578724153256	-0.00786276564795178
cg14582220	CLN6	CLN6	0.0501843788956572	0.279651019199475	0.0502265719870745
cg14509581	CLN6	CLN6	-0.0886260841355667	0.0559019321269863	-0.0888592241614628
cg25635009	CLN6	CLN6	0.0185086028530259	0.690256578059007	0.0185107167749031
cg22054756	CLN6	CLN6	0.0366037396207176	0.430516466341913	0.0366201004171395
cg19736128	EFS	EFS	-0.152765382842452	0.000938531597202067	-0.153970680675925
cg13011388	EFS	EFS	-0.196916847975325	1.85700084854758e-05	-0.199522987913001
cg11840125	EFS	EFS	-0.1535709244251	0.000881059403344358	-0.154795574720409
cg02213260	EFS	EFS	-0.214221771280581	3.0671364263991e-06	-0.217592016115356
cg17606785	EFS	EFS	-0.256117245041852	2.04955718388243e-08	-0.261948627820854
cg24114890	EFS	EFS	-0.266650184549689	5.00758807616556e-09	-0.273254109362154
cg18844382	EFS	EFS	-0.188546690870171	4.20300835262987e-05	-0.190829861387351
cg21013866	EFS	EFS	-0.194116737241015	2.45006635764347e-05	-0.196611581163307
cg14370314	EFS	EFS	-0.165514255349284	0.000333040665884389	-0.167051014525291
cg05857370	ERRFI1	ERRFI1	-0.199715571093716	1.40216202207873e-05	-0.202436291490042
cg08532870	ERRFI1	ERRFI1	-0.0287052456860843	0.536493445312401	-0.0287131338756063
cg01889893	ERRFI1	ERRFI1	-0.546300391067291	1.30406251862727e-37	-0.613092593834132
cg10051814	ERRFI1	ERRFI1	-0.232500659593831	3.87020267398317e-07	-0.236831410514385
cg26359510	ERRFI1	ERRFI1	-0.101476003360334	0.0284996361564895	-0.101826483636583
cg26313647	ERRFI1	ERRFI1	-0.102956973794915	0.0262511874241577	-0.103323091227457
cg17477995	ERRFI1	ERRFI1	-0.20357764974503	9.45384394059377e-06	-0.206462069588033
cg22122925	ERRFI1	ERRFI1	-0.328745969251402	3.31516334168904e-13	-0.341421622758909
cg27384769	IL27RA	IL27RA	-0.023317292009816	0.61561999763574	-0.0233215192291899
cg10744434	IL27RA	IL27RA	-0.0890638396724667	0.0546964118909353	-0.089300462589064
cg06860352	IL27RA	IL27RA	-0.0591951713097295	0.20211997326264	-0.0592644583479721
cg23273214	IL27RA	IL27RA	-0.0849509231106257	0.0669176921056944	-0.0851561665068065
cg18317474	IL27RA	IL27RA	-0.0667781279372495	0.150072053189791	-0.0668776560139286
cg01221623	IL27RA	IL27RA	-0.0577118839220204	0.213676631586156	-0.0577760851880588
cg20820249	WDR70	WDR70	-0.0357807985539713	0.440959713437303	-0.0357960799354146
cg16233489	WDR70	WDR70	0.105224183025217	0.0231054197562816	0.105615135434349
cg08390699	WDR70	WDR70	0.0205031032337745	0.658880827807521	0.0205059769713065
cg26496372	WDR70	WDR70	0.141764649377884	0.00215810066274625	0.14272595965977
cg04507958	WDR70	WDR70	0.0985426515415916	0.0334442803364584	0.098863494185181
cg09113141	OTUD1	OTUD1	-0.0122012859184352	0.792788020556252	-0.0122018914466066
cg08536417	OTUD1	OTUD1	-0.161761703849513	0.000455422330389573	-0.163195209617384
cg09093312	OTUD1	OTUD1	-0.0704231602642414	0.129006988522186	-0.0705399272982502
cg02213287	TTC5	TTC5	-0.256469990784821	1.95703057791118e-08	-0.262326173170724
cg17386114	PDCD6	PDCD6	-0.158820862238601	0.000579292531064162	-0.160176813046824
cg13275321	PDCD6	PDCD6	-0.202201466672298	1.08889146138134e-05	-0.205026804760464
cg09662430	PDCD6	PDCD6	0.268835699758715	3.70893242232317e-09	0.275608395844984
cg19030994	PDCD6	PDCD6	-0.299691939195408	3.98884203734046e-11	-0.309181110210432
cg13707777	PDCD6	PDCD6	-0.0224811205769753	0.628344356891048	-0.0224849090511699
cg22030839	PDCD6	PDCD6	-0.0620789702852098	0.180964174823869	-0.062158901806019
cg20990478	PDCD6	PDCD6	-0.103425273696454	0.0255727681188236	-0.103796431457925
cg09854184	PDCD6	PDCD6	-0.263969727525563	7.21004125609791e-09	-0.270370687857577
cg03569073	PDCD6	PDCD6	-0.242632793333533	1.13850783499699e-07	-0.247569705448601
cg03561637	PDCD6	PDCD6	-0.215987925133344	2.53029787575977e-06	-0.219443855320174
cg04286878	PDCD6	PDCD6	0.151455238763028	0.00103944500681721	0.152629504868673
cg17310215	PDCD6	PDCD6	-0.179357067788177	9.90115477137111e-05	-0.18131830722511
cg08802770	PDCD6	PDCD6	0.259339633351286	1.34051883232526e-08	0.265400293210762
cg06605558	PDCD6	PDCD6	-0.199859811015133	1.38185817936862e-05	-0.202586528125314
cg12323089	MRPS11	MRPS11	0.0974150701861281	0.0355307902218399	0.0977249831611876
cg03872267	MRPS11	MRPS11	-0.00304505616827344	0.947730255351817	-0.0030450655799519
cg16572315	MRPS11	MRPS11	-0.082302421412882	0.0759134691365277	-0.0824890106642152
cg04854451	MRPS11	MRPS11	-0.0841347523380846	0.0695915197725524	-0.0843341201178141
cg12548985	MRPS11	MRPS11	-0.136083471141831	0.00324573344194877	-0.136932960340192
cg00613399	MRPS11	MRPS11	0.104708945046985	0.023790121942816	0.105094157317836
cg26025224	MRPS11	MRPS11	-0.203212500578872	9.81599385001864e-06	-0.206081162457829
cg16963127	EPB41L2	EPB41L2	0.137581861865998	0.00291870559098041	0.138459941309296
cg20447568	EPB41L2	EPB41L2	-0.0834012995426258	0.0720683600864535	-0.0835954842195148
cg18374471	EPB41L2	EPB41L2	-0.133161448845119	0.00398085448280736	-0.133957001858907
cg27355739	EPB41L2	EPB41L2	-0.126207191478759	0.00637123011569713	-0.126883756025397
cg19692318	EPB41L2	EPB41L2	-0.164828479430203	0.000352820592438443	-0.166346004795716
cg22042382	EPB41L2	EPB41L2	-0.0162635894640919	0.726216451003327	-0.0162650236217146
cg19288027	EPB41L2	EPB41L2	0.0251032414968927	0.588828619567032	0.0251085166176847
cg25488021	EPB41L2	EPB41L2	0.194300312559175	2.40623960031404e-05	0.196802351767651
cg00140910	EPB41L2	EPB41L2	-0.0483579526747726	0.297545861864714	-0.0483957005412819
cg03010907	EPB41L2	EPB41L2	0.038010971495856	0.412993992388849	0.0380292938962578
cg19712745	EPB41L2	EPB41L2	0.318249802644841	1.9874754635778e-12	0.329698458745883
cg21134252	EPB41L2	EPB41L2	-0.126685757682287	0.0061726488070472	-0.127370098223633
cg19609315	CENPBD1P1	CENPBD1P1	-0.152457210681172	0.000961419537998997	-0.153655159969049
cg16396417	CENPBD1P1	CENPBD1P1	-0.0231144074945184	0.618697001143846	-0.023118525304406
cg06620654	CENPBD1P1	CENPBD1P1	-0.148754296723686	0.00127978458101767	-0.149866302052579
cg10075436	CENPBD1P1	CENPBD1P1	0.153848284995612	0.000862035745945934	0.15507964696634
cg21439498	CENPBD1P1	CENPBD1P1	0.0716517128198415	0.122447994403258	0.0717747111234008
cg09444255	CENPBD1P1	CENPBD1P1	0.063201361565636	0.173189163744031	0.0632857145837474
cg07786254	CENPBD1P1	CENPBD1P1	-0.244882065866271	8.61219974184756e-08	-0.249961068499553
cg13979592	CENPBD1P1	CENPBD1P1	-0.246134823514268	7.36345173865174e-08	-0.251294178784402
cg18429685	CENPBD1P1	CENPBD1P1	-0.0139320874353127	0.764208234779549	-0.0139329889605775
cg01050704	CENPBD1P1	CENPBD1P1	-0.128713617305436	0.00539142365637988	-0.129431575544019
cg01510332	CENPBD1P1	CENPBD1P1	0.145300205561415	0.00166154113119929	0.1463358901107
cg23196670	CENPBD1P1	CENPBD1P1	0.00490731664329495	0.915859629548347	0.00490735603613248
cg15539395	CENPBD1P1	CENPBD1P1	0.0859320221319691	0.0638157371677432	0.0861444805446111
cg15191848	CENPBD1P1	CENPBD1P1	-0.106848327226763	0.0210575365433321	-0.107257749047385
cg23487303	CENPBD1P1	CENPBD1P1	-0.0759776575943007	0.101401728990848	-0.0761243623732427
cg22010065	CENPBD1P1	CENPBD1P1	-0.133722392004662	0.00382901025028232	-0.134528114695808
cg13923040	CENPBD1P1	CENPBD1P1	-0.0524964414645881	0.258064003465195	-0.0525447459299123
cg26954695	CENPBD1P1	CENPBD1P1	-0.270448490477133	2.96676317492982e-09	-0.27734764219885
cg22359535	CENPBD1P1	CENPBD1P1	-0.245837011383849	7.64342628436369e-08	-0.250977185693403
cg14986359	CENPBD1P1	CENPBD1P1	0.167970308906426	0.000270368862804258	0.169577308006615
cg17335237	CENPBD1P1	CENPBD1P1	0.161119170159988	0.000480169717576009	0.162535481396411
cg03351307	CENPBD1P1	CENPBD1P1	0.126304473362427	0.00633040497118809	0.126982613754256
cg11686214	CENPBD1P1	CENPBD1P1	-0.158669801374061	0.000586430852852336	-0.160021847025774
cg07818431	C1orf35	C1orf35	-0.198501704080401	1.58463203260781e-05	-0.201172314892212
cg00105470	C1orf35	C1orf35	-0.30945223240289	8.45675405677952e-12	-0.319939518407991
cg22790377	C1orf35	C1orf35	-0.16976535444769	0.00023173330143774	-0.171425044801405
cg05120156	C1orf35	C1orf35	-0.360451538591108	9.60912711284485e-16	-0.377404769496661
cg19021960	C1orf35	C1orf35	-0.276277026197282	1.30764645297867e-09	-0.283646929608598
cg14255644	C1orf35	C1orf35	-0.241990702143966	1.23231755562617e-07	-0.24688756220047
cg00125159	C1orf35	C1orf35	0.0509338194183738	0.272523648841409	0.0509779331917417
cg01054023	C1orf35	C1orf35	0.0524508151398904	0.25847854178966	0.0524989936270795
cg15720832	C1orf35	C1orf35	-0.179189378240215	0.000100533099839635	-0.181145049361531
cg14925024	C1orf35	C1orf35	-0.248214677244807	5.66647861655359e-08	-0.253509371512364
cg07914919	C1orf35	C1orf35	0.0330990195641235	0.475978203100173	0.0331111146717508
cg08861826	LDHA	LDHA	-0.105764677912309	0.0224055513441429	-0.106161713240669
cg02132760	LDHA	LDHA	-0.061387408765091	0.185881655340044	-0.0614646946435538
cg03628148	LDHA	LDHA	-0.0672910615905604	0.146958889615926	-0.0673929050206874
cg01316516	LDHA	LDHA	-0.11654404191735	0.0118134624264664	-0.117076037882168
cg03644271	LDHA	LDHA	-0.123968360073243	0.00737841871750572	-0.124609335867213
cg19148297	LDHA	LDHA	-0.174774888408411	0.000149460851293056	-0.17658780612032
cg03177631	LDHA	LDHA	-0.0746199135635626	0.107673249678136	-0.0747588759467528
cg13900559	LDHA	LDHA	-0.220239445910287	1.58176960018765e-06	-0.223907747495118
cg09436562	LDHA	LDHA	-0.085497066869488	0.065176017175131	-0.0857063060141301
cg22837499	LDHA	LDHA	0.0382798551347555	0.409694500213944	0.0382985693521152
cg07187103	LDHA	LDHA	-0.115649214888842	0.0124823629438763	-0.116168985145618
cg22127027	LDHA	LDHA	-0.130981427883636	0.00462409058488808	-0.131738279074698
cg03641722	LDHA	LDHA	-0.29620682373598	6.84445960479317e-11	-0.305356460558228
cg20429911	LDHA	LDHA	-0.0890274587759033	0.0547957696741506	-0.0892637909181366
cg13190306	LDHA	LDHA	-0.0975513201069646	0.0352729292892296	-0.0978625402839146
cg25181631	LDHA	LDHA	-0.0576824949851724	0.213910312496884	-0.0577465980896705
cg10433104	LDHA	LDHA	-0.11839855444748	0.0105272338563018	-0.118956500435499
cg20639890	UBE3A	UBE3A	0.194592933280501	2.33791298539022e-05	0.197106471087622
cg00096039	UBE3A	UBE3A	0.0807534974597477	0.0816149787903659	0.0809297220990133
cg17973394	UBE3A	UBE3A	-0.170117618960626	0.000224785045933977	-0.17178778530375
cg12177023	UBE3A	UBE3A	0.123623656463854	0.00754554074344911	0.124259267295162
cg13932339	UBE3A	UBE3A	-0.0202988133558731	0.662068319017211	-0.0203016020320273
cg26505822	UBE3A	UBE3A	-0.104790660715931	0.023680372748932	-0.105176779561147
cg11826104	UBE3A	UBE3A	0.166010746058578	0.00031937115976642	0.167561532864148
cg08194505	UBE3A	UBE3A	0.109534021737744	0.0180162057990537	0.109975254568735
cg18766912	UBE3A	UBE3A	0.167728450815538	0.000276012239677454	0.169328438408062
cg12934016	UBE3A	UBE3A	-0.167888968012626	0.000272254681164235	-0.169493606705653
cg23681243	UBE3A	UBE3A	0.120819759975807	0.00903556887002907	0.121412848611393
cg12572011	UBE3A	UBE3A	0.0261124831103447	0.573930026983029	0.0261184205743392
cg21708767	DNMT3A	DNMT3A	0.0227247070076915	0.624626000774501	0.0227286199929939
cg15998962	DNMT3A	DNMT3A	-0.0305329565907237	0.510860078958284	-0.0305424501342428
cg10270719	DNMT3A	DNMT3A	-0.0848251745762599	0.067324072230093	-0.0850295052537064
cg10616515	DNMT3A	DNMT3A	-0.129176480918231	0.00522608634052872	-0.129902265241337
cg25044635	DNMT3A	DNMT3A	-0.0203029630612018	0.662003511039153	-0.0203057534482629
cg19489797	DNMT3A	DNMT3A	0.0244493424705609	0.598575600741011	0.0244542159159138
cg18889183	DNMT3A	DNMT3A	-0.145898810330342	0.00158867631729601	-0.146947459695639
cg26544247	DNMT3A	DNMT3A	-0.0663322074657791	0.152819008546321	-0.0664297515013987
cg00220517	DNMT3A	DNMT3A	-0.0341033072048721	0.462689342797011	-0.0341165375582133
cg13076778	DNMT3A	DNMT3A	-0.0189231214415889	0.683689675736506	-0.0189253806193129
cg26995204	DNMT3A	DNMT3A	-0.132109666772654	0.00428033329578409	-0.132886385187495
cg04436772	DNMT3A	DNMT3A	-0.195544644161835	2.12819213335216e-05	-0.198095828934348
cg23569120	DNMT3A	DNMT3A	0.0028521625365045	0.951037074196963	0.00285217027049589
cg17207266	DNMT3A	DNMT3A	-0.398720471424165	3.2982633801132e-19	-0.422126608262066
cg00912598	DNMT3A	DNMT3A	0.00241442426439388	0.958544349125179	0.00241442895599444
cg08316074	DNMT3A	DNMT3A	-0.154549706695564	0.000815607689764496	-0.155798152850362
cg00898683	DNMT3A	DNMT3A	-0.0258168316180077	0.578276013544684	-0.025822569627952
cg02208653	DNMT3A	DNMT3A	0.00991100329693232	0.831030742711492	0.00991132782869151
cg12066181	DNMT3A	DNMT3A	0.000212182671227172	0.996355202000009	0.000212182674411404
cg19256292	DNMT3A	DNMT3A	-0.141089021988009	0.00226718685851958	-0.142036542836572
cg03766400	DNMT3A	DNMT3A	-0.0122264248217824	0.792370820461406	-0.0122270341006925
cg06112956	DNMT3A	DNMT3A	0.0585426193881836	0.207146960289387	0.0586096370891224
cg15843262	DNMT3A	DNMT3A	-0.0150855168397143	0.745335906449849	-0.0150866613471879
cg00886730	DNMT3A	DNMT3A	-0.048425208590405	0.296873672805826	-0.048463114322831
cg15990840	DNMT3A	DNMT3A	-0.0162817567484323	0.725922898161534	-0.0162831957180247
cg15150970	DNMT3A	DNMT3A	-0.0524054697179005	0.25889098357738	-0.052453523220114
cg05896193	DNMT3A	DNMT3A	-0.398590943620485	3.39464626124218e-19	-0.421972605330668
cg03463641	DNMT3A	DNMT3A	-0.0131194311804483	0.777589946610042	-0.013120183961391
cg13344237	DNMT3A	DNMT3A	0.0182355862534505	0.694594540499011	0.0182376079901671
cg11343289	DNMT3A	DNMT3A	0.0067944659111275	0.88370025233608	0.00679457046900225
cg12116395	ATP6AP2	ATP6AP2	-0.0625149614511493	0.177913853409647	-0.0625965916146112
cg20887366	ATP6AP2	ATP6AP2	-0.00082386717510869	0.985848595031177	-0.000823867361510658
cg07381502	ATP6AP2	ATP6AP2	0.00808663396687319	0.86178652298607	0.00808681024529062
cg06731599	ATP6AP2	ATP6AP2	0.0273338257714228	0.556142074991968	0.0273406362049423
cg10347293	ATP6AP2	ATP6AP2	0.0238838289600327	0.607063466713553	0.0238883719238751
cg02763798	XRCC6BP1	XRCC6BP1	0.0600657491594073	0.195552220595466	0.0601381428939521
cg18316386	XRCC6BP1	XRCC6BP1	-0.0128175475852053	0.782577988799198	-0.0128182495840114
cg20553107	XRCC6BP1	XRCC6BP1	-0.326921677319617	4.54844345020115e-13	-0.339377654462487
cg10055173	PLP2	PLP2	-0.0297957180135581	0.52112243746147	-0.0298045401086128
cg17878135	PLP2	PLP2	-0.0518200848063531	0.264256209234566	-0.0518665442083283
cg15132216	PLP2	PLP2	-0.017617760261497	0.704447876243357	-0.0176195833666669
cg07210835	PLP2	PLP2	-0.12528745764127	0.00676903173427062	-0.125949245269611
cg10542519	PLP2	PLP2	-0.488132985166128	2.84656187414577e-29	-0.533606364250772
cg12026625	PLP2	PLP2	-0.0304891621452182	0.511466743101209	-0.0304986148814088
cg02602528	PLP2	PLP2	-0.0388363987909518	0.402914951077939	-0.0388559416844805
cg12653105	PLP2	PLP2	-0.00184333460087	0.968344030663171	-0.00184333668868566
cg04834534	NOP16	NOP16	0.00968105403436629	0.834894137358054	0.009681356496562
cg01252586	NOP16	NOP16	-0.102740290956526	0.026570303166212	-0.103104091847515
cg11181536	NOP16	NOP16	-0.0825469242326819	0.0750438005553959	-0.0827351859575535
cg16470576	NOP16	NOP16	0.0152220906335992	0.74311110161365	0.0152232665109902
cg01590787	NOP16	NOP16	-0.270004179017826	3.15544216278709e-09	-0.276868330284172
cg06544239	GNA12	GNA12	-0.170004565882635	0.000226993437057924	-0.17167136526794
cg07168181	GNA12	GNA12	0.220664553095606	1.50840563697019e-06	0.224354569845518
cg18242990	GNA12	GNA12	-0.00890749551536303	0.847919411712198	-0.00890773111046547
cg27241559	GNA12	GNA12	0.00886294326434831	0.848670886206548	0.00886317534189365
cg00947599	GNA12	GNA12	-0.207587416067105	6.22867663388812e-06	-0.210648790841501
cg14863265	GNA12	GNA12	-0.0625291608540745	0.177815155706086	-0.0626108467409413
cg12444411	GNA12	GNA12	-0.185478398510904	5.62103105414943e-05	-0.187650367533708
cg01172766	GNA12	GNA12	0.164556332072897	0.000360969498176266	0.166066270025696
cg03185022	GNA12	GNA12	-0.314299941057506	3.83029432182142e-12	-0.325309569195494
cg21143896	GNA12	GNA12	-0.191107611946272	3.28572786823166e-05	-0.193486514908415
cg01839603	GNA12	GNA12	-0.0161484542919859	0.728077772631794	-0.0161498582029949
cg19524238	GNA12	GNA12	-0.186430904717392	5.13851923300994e-05	-0.188636990387836
cg05191928	GNA12	GNA12	-0.0299403438246002	0.519100938084761	-0.0299492950556909
cg21685565	GNA12	GNA12	0.0151198697576365	0.744776092799145	0.0151210221025044
cg11461133	GNA12	GNA12	-0.172164818496284	0.000188112933909578	-0.173896755974866
cg21628055	GNA12	GNA12	0.00264154108599336	0.954648763099579	0.00264154723001414
cg05793240	GNA12	GNA12	-0.21143268017141	4.14257258474195e-06	-0.214670595767927
cg08799766	GNA12	GNA12	-0.0114153071320979	0.805861210878032	-0.0114158030108562
cg24824703	GNA12	GNA12	-0.131844801467176	0.00435889105953539	-0.132616824677983
cg14776114	HEY2	HEY2	-0.106340415588645	0.0216803273289817	-0.106743999996035
cg08923450	HEY2	HEY2	-0.0573029458153024	0.216944753958893	-0.0573657901878175
cg10911889	HEY2	HEY2	-0.0803837010750264	0.0830261734358144	-0.0805575095670329
cg01868782	HEY2	HEY2	-0.191921559916418	3.03633431081116e-05	-0.194331453450104
cg08442529	HEY2	HEY2	-0.030003994623865	0.518212543267185	-0.0300130030858712
cg04822330	HEY2	HEY2	-0.123421939908589	0.00764490022882698	-0.124054425283991
cg04787432	HEY2	HEY2	-0.246596785342492	6.948650847501e-08	-0.251785991757764
cg05901451	HEY2	HEY2	-0.0466714583120555	0.314732982528298	-0.0467053896485793
cg22168941	HEY2	HEY2	-0.308875892914063	9.28284498409919e-12	-0.319302269060827
cg24424146	HEY2	HEY2	-0.0902673182821634	0.0514931225554176	-0.0905136956418387
cg11734790	HEY2	HEY2	-0.0028843329064335	0.950485510382732	-0.00288434090509036
cg10291555	HEY2	HEY2	-0.100104905057889	0.0307267267162943	-0.100441313559274
cg06289844	HEY2	HEY2	-0.341988007053028	3.13032899275256e-14	-0.356342111673556
cg08172044	HEY2	HEY2	-0.0560664435264054	0.227044187180003	-0.0561253018580345
cg13799242	HEY2	HEY2	-0.606845630418581	3.2242558148432e-48	-0.703912983869605
cg20462855	HEY2	HEY2	-0.0472561979021595	0.308701655833294	-0.0472914218087356
cg02797038	HEY2	HEY2	-0.0693960503633695	0.134696590875951	-0.0695077728015678
cg23407970	HEY2	HEY2	-0.0750398109317932	0.105701835452485	-0.0751811377799605
cg06775930	HEY2	HEY2	-0.124756499787161	0.00700867934087171	-0.125409856488288
cg03095562	HEY2	HEY2	-0.448700603814099	1.82733112725999e-24	-0.483072134002354
cg14409850	ASUN	ASUN	-0.136026891649533	0.0032587099818626	-0.136875313751154
cg02301006	ASUN	ASUN	0.0390484480355356	0.400349601193978	0.0390683129935761
cg05289701	ASUN	ASUN	0.151897489964	0.00100431263667799	0.15308216996393
cg22545840	ASUN	ASUN	-0.215088247103792	2.79142043975554e-06	-0.218500344863907
cg08814698	ASUN	ASUN	-0.151388554339632	0.00104483969503824	-0.152561255585364
cg13948050	PROSER2	PROSER2	-0.236974274078432	2.27013897322493e-07	-0.241565913814844
cg09674175	PROSER2	PROSER2	-0.162457883616841	0.000429951003309357	-0.163910178502454
cg27174837	PROSER2	PROSER2	-0.157938843257323	0.000622139460573684	-0.159272100018435
cg12329275	PROSER2	PROSER2	0.0309449848390814	0.505170845893294	0.0309548680757034
cg06953130	PROSER2	PROSER2	0.0678186811584498	0.143808204713083	0.0679229435169247
cg03411288	PROSER2	PROSER2	-0.209078139443657	5.32253123123588e-06	-0.212207151374169
cg10023838	PROSER2	PROSER2	-0.323627235097316	8.00920207916539e-13	-0.335693400466919
cg23326811	PROSER2	PROSER2	-0.108300999636631	0.0193613099783749	-0.108727429320905
cg01291665	PROSER2	PROSER2	0.158373284846849	0.000600680559583649	0.159717687240642
cg25233302	PROSER2	PROSER2	0.0645801677935294	0.163981979968879	0.0646701724327827
cg13904771	PROSER2	PROSER2	-0.151692378883612	0.00102046811135621	-0.152872221308356
cg04654479	PROSER2	PROSER2	0.155905448943681	0.000732357365003756	0.15718736933836
cg08584759	PROSER2	PROSER2	0.104582056784188	0.0239614123835559	0.104965864157402
cg22819767	PROSER2	PROSER2	-0.201379320444812	1.18427533543022e-05	-0.204169760166641
cg12054421	PPP1R7	PPP1R7	-0.0631905413925172	0.173262909691442	-0.0632748510245248
cg00311772	PPP1R7	PPP1R7	0.244576971736571	8.94595250783252e-08	0.249636537374136
cg19127360	PPP1R7	PPP1R7	-0.0473139530577533	0.308110098512361	-0.0473493063872222
cg15694752	PPP1R7	PPP1R7	-0.201475135046834	1.17276301154023e-05	-0.204269626644163
cg17311725	PPP1R7	PPP1R7	-0.0638540368946234	0.168783922792368	-0.0639410346565277
cg01143204	PES1	PES1	0.133686110824752	0.00383867037903216	0.134491173117698
cg17838402	PES1	PES1	0.214513539542643	2.97150863853773e-06	0.217897837961679
cg03970350	PES1	PES1	-0.0682669066495111	0.141172408148551	-0.068373253872367
cg26532826	PES1	PES1	-0.0264755515727808	0.568614226551371	-0.0264817402310315
cg04332545	PES1	PES1	-0.0703209474543096	0.129564711974367	-0.0704372057880976
cg00788739	PES1	PES1	-0.0535664829777345	0.248473711802054	-0.0536178053502226
cg01369114	PES1	PES1	-0.0658361844042264	0.15591921886129	-0.0659315527351818
cg01284869	PES1	PES1	-0.0373100580294401	0.421668380804156	-0.0373273848732872
cg15194925	PES1	PES1	-0.299316943165651	4.22892293702088e-11	-0.308769161143776
cg23568913	PES1	PES1	0.0307253388781934	0.508199542498238	0.0307350130742084
cg11875119	PES1	PES1	-0.0312223274321044	0.501360153371363	-0.031232478896333
cg22542751	PES1	PES1	-0.00156881184019522	0.973056524325739	-0.00156881312723502
cg09429583	PES1	PES1	0.113915530486896	0.0138740442643499	0.114412154042509
cg12310757	HSDL2	HSDL2	0.237595626057147	2.10623258112484e-07	0.242224337822247
cg13986501	HSDL2	HSDL2	-0.121468011121266	0.00866954572696685	-0.122070755112471
cg11288092	HSDL2	HSDL2	0.0316466478932164	0.495559481522325	0.031657219061074
cg13506510	HSDL2	HSDL2	0.104567687732353	0.0239808766523393	0.104951336229544
cg13518211	HSDL2	HSDL2	0.0312237659926159	0.501340427159732	0.0312339188606348
cg26827702	RPS13P2	RPS13P2	0.00407810010326899	0.930037217655824	0.00407812271098696
cg11750103	RPS13P2	RPS13P2	-0.176640459176404	0.00012654650725876	-0.178512808474714
cg09391979	PTCD3	PTCD3	-0.0480274587364749	0.300863706299229	-0.0480644372286793
cg10829120	PTCD3	PTCD3	-0.100433970340037	0.0301790652162408	-0.100773720854236
cg01119172	PTCD3	PTCD3	-0.0484018845109684	0.297106670504644	-0.0484397354463111
cg08521046	PTCD3	PTCD3	-0.100582666260008	0.0299343472187849	-0.100923934218188
cg19124316	PTCD3	PTCD3	-0.0546085113800294	0.239376048533286	-0.0546628912022806
cg01869548	FLYWCH2	FLYWCH2	-0.0792898310889615	0.0873162035600226	-0.0794566225142449
cg27500918	FLYWCH2	FLYWCH2	-0.120577742499024	0.00917570630804037	-0.121167253253866
cg27312549	FLYWCH2	FLYWCH2	-0.0161062395420632	0.728760634690638	-0.0161076324705194
cg08701515	FLYWCH2	FLYWCH2	-0.0321182883525091	0.489154074335717	-0.0321293394356309
cg03283048	FLYWCH2	FLYWCH2	-0.166259753133027	0.000312714266032283	-0.167817607845439
cg27163692	FLYWCH2	FLYWCH2	0.00302604099797685	0.94805619774217	0.00302605023443681
cg12741488	FLYWCH2	FLYWCH2	-0.166471958089376	0.000307143656796467	-0.168035853312999
cg22658244	ZNF551	ZNF551	-0.100851174186264	0.0294967532165065	-0.101195193775426
cg24167603	ZNF551	ZNF551	-0.0851897134056886	0.0661515371507258	-0.0853966975161099
cg20756934	RPL41	RPL41	-0.0155853001385336	0.737204813019217	-0.0155865622204873
cg18942715	RPL41	RPL41	-0.133695902037348	0.00383606122518375	-0.134501142516198
cg04546471	RPL41	RPL41	0.0440922039089089	0.342251756505182	0.044120810833313
cg04904245	RPL41	RPL41	-0.321144714486667	1.22120813375975e-12	-0.332922935860067
cg02007236	RPL41	RPL41	-0.175499836535168	0.000140129057937292	-0.177335694330651
cg25820475	RPL41	RPL41	-0.123860585624621	0.00743031165554398	-0.124499880757534
cg20985486	RPL41	RPL41	-0.121254228840778	0.00878876720615142	-0.121853777065286
cg27185992	RPL41	RPL41	-0.0853028066003838	0.0657912014021582	-0.0855106185666425
cg03123773	RPL41	RPL41	-0.184892624776911	5.9386842016094e-05	-0.187043792079182
cg14555682	RPL41	RPL41	-0.281585199496578	6.09670517774882e-10	-0.289402954488428
cg10861390	ASB2	ASB2	-0.212482345492767	3.70123750970874e-06	-0.215769636708458
cg04584103	ASB2	ASB2	0.164709856602632	0.000356351199738915	0.166224071618957
cg15817482	ASB2	ASB2	-0.239400477463625	1.69222866534354e-07	-0.244138044008854
cg19949550	ASB2	ASB2	-0.0108979371610788	0.814496488082886	-0.0108983686231186
cg09341793	ASB2	ASB2	0.215088121739266	2.79145856048663e-06	0.218500213418325
cg03536289	ASB2	ASB2	-0.239130420158445	1.74875580519611e-07	-0.243851587661425
cg00839873	ASB2	ASB2	-0.0325995039106692	0.482664717288464	-0.0326110594112254
cg18572214	ASB2	ASB2	0.0699074681433077	0.131839920180316	0.0700216837639004
cg05861512	ASB2	ASB2	-0.244320375729244	9.23628361877563e-08	-0.249363633980598
cg14019523	ASB2	ASB2	0.0619814087358104	0.181652012158031	0.0620609634146426
cg04517524	ASB2	ASB2	0.170927212012272	0.000209548103498452	0.17262162470013
cg01798419	ASB2	ASB2	0.220245187827631	1.58075627466965e-06	0.223913782132683
cg16548201	ASB2	ASB2	0.119180113595675	0.0100234569383371	0.11974924598418
cg01956154	ASB2	ASB2	-0.0408669362422921	0.378754047111299	-0.0408897097788392
ch.14.93511233R	ASB2	ASB2	-0.113267460785182	0.0144283162947778	-0.113755612948575
cg09948958	ASB2	ASB2	-0.257114418676557	1.79832615088296e-08	-0.263016096157797
cg12148979	MZT2A	MZT2A	-0.161918343282781	0.000449571874168507	-0.163356062131137
cg01965950	MZT2A	MZT2A	-0.0165210107573339	0.722060713229374	-0.0165225141060051
cg18101118	EXOSC7	EXOSC7	-0.197180661079133	1.8087720352574e-05	-0.199797458209422
cg04690289	EXOSC7	EXOSC7	-0.00301198777164706	0.948297092146551	-0.00301199688001826
cg21307697	EXOSC7	EXOSC7	0.0241087785498131	0.603680750038369	0.0241134511202936
cg09626867	EXOSC7	EXOSC7	-0.0394492249820759	0.395527847140103	-0.039469708283393
cg12058646	EXOSC7	EXOSC7	-0.0882281043289552	0.0570169797843317	-0.0884581078803988
cg22930777	EXOSC7	EXOSC7	-0.177127026163847	0.000121137448919986	-0.179015090812003
cg05161795	EXOSC7	EXOSC7	-0.220492047245887	1.53777432366094e-06	-0.224173241503488
cg13964906	EXOSC7	EXOSC7	-0.118646448053585	0.0103650681277817	-0.119207925964021
cg08543242	EXOSC7	EXOSC7	-0.0418692635798978	0.367162464728497	-0.0418937554441988
cg20528837	EXOSC7	EXOSC7	-0.00312063883359958	0.946434766284535	-0.00312064896365474
cg04432377	EXOSC7	EXOSC7	-0.291574056396816	1.38733875868052e-10	-0.300285712110458
cg01147013	EXOSC7	EXOSC7	-0.151680462470788	0.00102141403104544	-0.152860024256364
cg25766774	EXOSC7	EXOSC7	-0.208579021316211	5.61091344683443e-06	-0.211685274509505
cg24620338	FAM86C1	FAM86C1	-0.0545506954017935	0.239874604968454	-0.0546049024795023
cg12194828	PIGA	PIGA	-0.00627559050404196	0.892525795310996	-0.00627567288992461
cg01408383	PIGA	PIGA	-0.025664483284443	0.580521493003201	-0.0256701202839849
cg20517444	PIGA	PIGA	-0.0191675015793367	0.679829254023094	-0.0191698494329584
cg26939525	PIGA	PIGA	-0.0123149029907239	0.790902926855255	-0.0123155255937845
cg27251926	PIGA	PIGA	-0.0168615137622142	0.716576280330929	-0.0168631120041534
cg16328033	PIGA	PIGA	-0.0197948055034366	0.669958294510945	-0.0197973915395262
cg12996305	MNT	MNT	0.0671848045224457	0.147599722562191	0.0672861653890384
cg00906435	MNT	MNT	0.0152013033924169	0.743449591061687	0.0152024744586151
cg12685560	MNT	MNT	-0.126537191110686	0.00623369365461099	-0.127219111260439
cg22188945	MNT	MNT	-0.119704661311561	0.00969746028131781	-0.120281385472426
cg18413116	MNT	MNT	-0.132855821855637	0.00406586030052923	-0.133645870550421
cg06970884	MNT	MNT	-0.169403795635301	0.000239073441647555	-0.171052780049241
cg23147149	MNT	MNT	0.0343202015905706	0.459846694776354	0.034333686105011
cg03252718	MNT	MNT	-0.00172869622725419	0.970311803451647	-0.0017286979492639
cg16830078	MNT	MNT	0.00341297946054016	0.941425399018796	0.00341299271258225
cg12940054	MNT	MNT	-0.0254541707589399	0.583627984920222	-0.0254596702750911
cg01485948	MNT	MNT	-0.0342075942907911	0.461321323973911	-0.034220946447096
cg27406664	MNT	MNT	-0.0580912433171626	0.210676690199687	-0.0581567207030557
cg21621366	MNT	MNT	-0.111499366357691	0.016040668191334	-0.111964901285741
cg19949929	MNT	MNT	0.0754902126919528	0.103619044408146	0.0756341055296271
cg13020947	MNT	MNT	0.0500640408673297	0.280807126366609	0.0501059308554275
cg24732524	MSANTD3	MSANTD3	-0.0530783311792351	0.252817521315126	-0.0531282616324715
cg03529003	PLOD1	PLOD1	-0.100040070137087	0.0308356283684703	-0.100375822780866
cg23231974	PLOD1	PLOD1	-0.116648324715954	0.0117376085104211	-0.117181757909756
cg08864318	PLOD1	PLOD1	-0.211962674174476	3.91380079715777e-06	-0.215225456367166
cg02101693	PLOD1	PLOD1	0.076362834416744	0.0996763948324492	0.0765117870020117
cg05155371	PLOD1	PLOD1	0.0338216728223251	0.466395016009032	0.0338345779472757
cg07973967	CD79B	CD79B	-0.411150937978387	1.95861442340858e-20	-0.436995514544391
cg09648933	CD79B	CD79B	-0.419782306755481	2.56875552041652e-21	-0.447427733720156
cg23927124	CD79B	CD79B	0.0149027502191007	0.748316510927215	0.0149038536264946
cg03631294	CD79B	CD79B	-0.178781703291784	0.000104324453045134	-0.180723881961887
cg08355301	CD79B	CD79B	-0.423662577972956	1.01094652078366e-21	-0.452147409456101
cg11746924	CD79B	CD79B	-0.239393261118984	1.69371599293864e-07	-0.244130388945969
cg04602992	CD79B	CD79B	-0.495262934782766	3.283908874394e-30	-0.543009857861047
cg17740406	FARS2	FARS2	-0.195188738200381	2.20443944750132e-05	-0.197725799636849
cg17107193	FARS2	FARS2	-0.0926483162166087	0.0456157171612746	-0.0929147786856611
cg14823080	FARS2	FARS2	0.179571988389026	9.70931116940114e-05	0.181540380247537
cg26165608	FARS2	FARS2	0.181245002358531	8.33117355126829e-05	0.183269678535499
cg17926000	FARS2	FARS2	0.278200429090469	9.93631658606749e-10	0.285730477589711
cg03119599	FARS2	FARS2	0.151637129569671	0.00102486060110567	0.152815671218043
cg09085698	FARS2	FARS2	0.0972064506143387	0.0359287205743267	0.0975143692041514
cg15638207	FARS2	FARS2	0.1857931674335	5.45703414719899e-05	0.187976370739782
cg02479100	FARS2	FARS2	0.112443429169967	0.0151611309098169	0.112920950732356
cg15669273	FARS2	FARS2	0.0573382770838398	0.216660989318684	0.0574012379253057
cg14242460	FARS2	FARS2	-0.0992550804298326	0.0321805827423927	-0.0995829601917723
cg20979296	DDX60L	DDX60L	-0.0805477726643457	0.0823976399730208	-0.0807226503998311
cg06654302	DDX60L	DDX60L	-0.0901632197105765	0.0517638728284214	-0.0904087428811755
cg06207290	DDX60L	DDX60L	-0.12597772596597	0.00646846417883968	-0.126650583225318
cg04337611	DDX60L	DDX60L	-0.0845399479919973	0.0682533419896737	-0.0847422184949686
cg27470295	DDX60L	DDX60L	-0.0849557915207565	0.0669019994838214	-0.0851610703080282
cg02942142	DDX60L	DDX60L	-0.133377863389305	0.00392163809838185	-0.134177329601255
cg10209087	DDX60L	DDX60L	-0.3179536745693	2.08838059808349e-12	-0.32936899238922
cg00218484	DDX60L	DDX60L	-0.200543219323192	1.28939983826585e-05	-0.203298471621431
cg19210358	DDX60L	DDX60L	-0.0802786941653161	0.0834304672208234	-0.0804518206358426
cg17139085	SH3D21	SH3D21	-0.00242779400668018	0.958314998448824	-0.00242779877665166
cg17710804	SH3D21	SH3D21	-0.285026225923018	3.68537576231799e-10	-0.293144271995492
cg17942851	SH3D21	SH3D21	0.0248063018056347	0.593245734723145	0.0248113918926001
cg02993069	SH3D21	SH3D21	-0.00635430511616265	0.891186058199683	-0.00635439064123707
cg26893197	SH3D21	SH3D21	-0.152284288112378	0.000974487099099396	-0.153478127258729
cg11673291	SH3D21	SH3D21	-0.0134763578997768	0.77170420455544	-0.0134771738124551
cg17960769	SH3D21	SH3D21	-0.223771163132093	1.06304110018672e-06	-0.227622558893057
cg05966983	SH3D21	SH3D21	-0.152647341298809	0.000947238424828263	-0.153849820771862
cg12679760	SH3D21	SH3D21	-0.0290971068168634	0.530943807278892	-0.0291053225980279
cg00573880	SH3D21	SH3D21	-0.16225815964102	0.000437119337649723	-0.163705047239701
cg03506609	SH3D21	SH3D21	-0.181744174202964	7.95709985788229e-05	-0.183785853337494
cg13446200	SH3D21	SH3D21	-0.161654755999674	0.000459457411455725	-0.163085390034579
cg19373545	SH3D21	SH3D21	-0.393922768574325	9.50542956729102e-19	-0.416434882247764
cg05063806	SH3D21	SH3D21	-0.184493805092798	6.16457048712653e-05	-0.186630887561843
cg19808978	RCN3	RCN3	-0.273434601772968	1.95458017732506e-09	-0.280572221396447
cg21941030	RCN3	RCN3	-0.306932729374548	1.26912158715304e-11	-0.317155588359858
cg04558175	RCN3	RCN3	-0.631817618624385	2.70954073239006e-53	-0.744435679511049
cg19403104	RCN3	RCN3	-0.256165014948157	2.03678353606221e-08	-0.26199975188929
cg04378886	RCN3	RCN3	-0.386218452328049	5.01889221160046e-18	-0.407347850776282
cg06405765	PPP4C	PPP4C	0.0288435408973876	0.534531556016488	0.0288515436857076
cg08155338	PPP4C	PPP4C	0.0323264311679532	0.486341462624232	0.0323376985870677
cg05226926	PPP4C	PPP4C	-0.141700404599495	0.00216826330367026	-0.142660397868942
cg22739204	PPP4C	PPP4C	-0.0608247397439078	0.189954719174743	-0.0608999167535392
cg03669292	PPP4C	PPP4C	0.0386560382138496	0.405104643074839	0.0386753099299514
cg27318352	PPP4C	PPP4C	-0.0700006249358729	0.131324641918903	-0.07011529866749
cg01142152	PPP4C	PPP4C	-0.0800524861570769	0.0843068051687855	-0.0802241494930344
cg11970301	PPP4C	PPP4C	-0.0082316388218618	0.85933368637806	-0.00823182475436771
cg23166955	ALDOA	ALDOA	-0.0427499596552142	0.35716149144492	-0.042776030941172
cg02891495	ALDOA	ALDOA	0.00804387945856008	0.862509993711513	0.00804405295567912
cg04306817	ALDOA	ALDOA	-0.00143205127420975	0.97540453429011	-0.00143205225314725
cg00026230	ALDOA	ALDOA	0.0576776975683225	0.213948475744522	0.0577417846585665
cg01165575	ALDOA	ALDOA	0.0378456984105065	0.415029834519735	0.0378637827129944
cg10103580	ALDOA	ALDOA	-0.0803208791430079	0.0832678575669977	-0.0804942793899538
cg25568297	ALDOA	ALDOA	-0.0823855910560929	0.0756167289837027	-0.0825727480920665
cg00300822	ALDOA	ALDOA	-0.0147985803839898	0.750017021223871	-0.0147996608123708
cg16362480	ALDOA	ALDOA	-0.00010617409967865	0.998176174569063	-0.000106174100077603
cg00667360	ALDOA	ALDOA	-0.00731423286275866	0.874873946367702	-0.0073143632992279
cg05048002	ALDOA	ALDOA	-0.0911223178489937	0.0493137480982085	-0.0913757864338637
cg01667953	ALDOA	ALDOA	-0.28020001024032	7.45170128293995e-10	-0.287899110644296
cg02640572	ALDOA	ALDOA	-0.0475556337205814	0.305642797681534	-0.0475915320734765
cg07025134	ALDOA	ALDOA	0.0190918185828341	0.681023914192361	0.0190941387305504
cg08020660	ALDOA	ALDOA	-0.0918101877302845	0.0476168698614109	-0.0920694596659919
cg14460708	NCEH1	NCEH1	0.0276490624526943	0.55159479951316	0.0276561113184575
cg02802062	NCEH1	NCEH1	-0.00133832798979012	0.977013771218557	-0.00133832878882713
cg00799078	NCEH1	NCEH1	0.0527355149801321	0.255899412334221	0.0527844831449857
cg01232492	NCEH1	NCEH1	0.0258157230135543	0.578292338678272	0.0258214602841429
cg10532262	NCEH1	NCEH1	0.0629611307101568	0.174831991721136	0.0630445239708837
cg23221606	NCEH1	NCEH1	-0.0913202341094046	0.0488204119662042	-0.0915753634393127
cg14466989	NCEH1	NCEH1	0.158184961203625	0.000609896929078113	0.159524524427764
cg08037420	NCEH1	NCEH1	0.160755614383825	0.000494720301166916	0.162162258836307
cg13135462	NCEH1	NCEH1	0.0652142535594166	0.159873294092447	0.0653069400614462
cg19887178	NCEH1	NCEH1	-0.00486122229829103	0.916647072985795	-0.00486126059146349
cg04554905	NCEH1	NCEH1	0.145173342907937	0.00167737173566473	0.146206293788422
cg08366277	NCEH1	NCEH1	0.0522974777349201	0.259875060135734	0.052345234452514
cg00589895	NCEH1	NCEH1	0.0329243561329389	0.478310475190272	0.0329362606892268
ch.12.1174756R	SMARCC2	SMARCC2	-0.177464862363035	0.000117510427940387	-0.17936389115319
cg24446923	RCAN3	RCAN3	0.0839313071399858	0.0702714606386691	0.0841292280634843
cg02671019	RCAN3	RCAN3	-0.156483229341645	0.000699329230867836	-0.157779598166672
cg00311307	RCAN3	RCAN3	-0.054787734090388	0.237835212709418	-0.0548426517359039
cg02641560	RCAN3	RCAN3	0.0307526904448389	0.507821875124586	0.0307623905094388
cg00591489	RCAN3	RCAN3	-0.0484433058895362	0.296692972375273	-0.0484812541758315
cg00917251	RCAN3	RCAN3	-0.273165885803917	2.02979620433803e-09	-0.280281814020174
cg02994588	RCAN3	RCAN3	0.253767910687869	2.78302121801551e-08	0.259435980685152
cg16731157	RCAN3	RCAN3	-0.218060312323458	2.01478073612856e-06	-0.221618676356595
cg01768001	RCAN3	RCAN3	-0.393388745067109	1.06825823751308e-18	-0.415802928019194
cg23281714	RCAN3	RCAN3	0.00868066772191202	0.851746796434487	0.00868088577275967
cg24367431	RCAN3	RCAN3	-0.0626462935262963	0.177002535385697	-0.0627284400525947
cg16905527	RCAN3	RCAN3	0.0170263580073975	0.713926362753152	0.017028003589584
cg02850329	RCAN3	RCAN3	-0.0706832245438488	0.127596332223452	-0.0708012925912207
cg20146241	RCAN3	RCAN3	0.041608074564772	0.370161591218322	0.0416321106117966
cg13789423	GALC	GALC	0.137424285051234	0.00295162865204799	0.138299327758476
cg18103730	GALC	GALC	-0.301016653299006	3.24253767227057e-11	-0.310637180663116
cg10122474	GALC	GALC	-0.238561445789093	1.87386669704697e-07	-0.243248191077843
cg24058132	GALC	GALC	-0.367285697099851	2.49565480117694e-16	-0.385281914270628
cg08837308	GALC	GALC	-0.301247104161693	3.12743432779495e-11	-0.310890612862731
cg14084312	GALC	GALC	-0.193096241226285	2.70783050321094e-05	-0.195551343658701
cg01035038	GALC	GALC	-0.321990905838022	1.05811582202879e-12	-0.333866720112747
cg04738877	GALC	GALC	-0.131122824676751	0.00457968459100209	-0.131882146746388
cg04052570	GALC	GALC	-0.223895107276196	1.04819364976759e-06	-0.22775304032303
cg26245531	GALC	GALC	-0.295689505385896	7.41101475905513e-11	-0.30478948330905
cg01320040	ZBTB21	ZBTB21	0.0613148114184746	0.186403529072381	0.0613918230110892
cg11064558	ZBTB21	ZBTB21	0.0764539460152067	0.0992717088654275	0.076603433655892
cg24349573	ZBTB21	ZBTB21	-0.0377769451145741	0.415878479279452	-0.0377949309799839
cg16458021	ZBTB21	ZBTB21	0.0526764664124118	0.256432869954563	0.0527252700880266
cg07249227	ZBTB21	ZBTB21	0.0854594773436861	0.0652946854308297	0.0856684398176335
cg14743055	ZBTB21	ZBTB21	0.15117433293675	0.00106234515465329	0.152342016663106
cg22584172	ZNF451	ZNF451	-0.347471170248201	1.13929998749879e-14	-0.362564792906885
cg09757620	ZNF451	ZNF451	0.19588415656921	2.05779436320185e-05	0.198448864047284
cg23371123	ZNF451	ZNF451	-0.172012704631739	0.000190632147972975	-0.173739999849135
cg22029709	ZNF451	ZNF451	-0.0756530358473963	0.102874152738435	-0.0757978639211423
cg25029615	ZNF451	ZNF451	-0.12568439279007	0.00659469836306045	-0.126352530848091
cg04703800	ZNF451	ZNF451	-0.190400498035025	3.51801560823261e-05	-0.192752699541882
cg02485479	ZNF451	ZNF451	-0.130149140990019	0.00489343941375115	-0.130891557823125
cg14081859	ZNF451	ZNF451	-0.105211584103216	0.0231219568598405	-0.10560239547072
cg18752785	RNF24	RNF24	0.0782721465542158	0.0914658516126559	0.0784325822400898
cg20879272	RNF24	RNF24	-0.0472327807004028	0.308941719717614	-0.0472679522218797
cg23834525	RNF24	RNF24	-0.309572945482876	8.29305615770063e-12	-0.320073020751405
cg10634191	RNF24	RNF24	-0.140453326963656	0.00237439964365996	-0.141387995841809
cg04485867	RNF24	RNF24	-0.043390853633326	0.349992227833865	-0.0434181160477769
cg03372467	BCL7C	BCL7C	0.00129716352222256	0.977720598560309	0.00129716424977335
cg23230564	DROSHA	DROSHA	0.0425696670171074	0.359194806465268	0.042595409597072
cg00602326	DROSHA	DROSHA	-0.135833223936317	0.00330348520822609	-0.136678000280095
cg15929201	DROSHA	DROSHA	0.143667643419794	0.00187611828702778	0.144668520212727
cg06537718	DROSHA	DROSHA	-0.110009775241448	0.0175194463229931	-0.11045681077146
cg15409468	DROSHA	DROSHA	0.168716797968931	0.000253623163680148	0.170345569289523
cg25102343	DROSHA	DROSHA	0.0937086149110868	0.0431857509324093	0.0939843638645804
cg12598688	DROSHA	DROSHA	-0.0556795846635519	0.230271519038403	-0.0557372315147261
cg14218374	LEMD2	LEMD2	-0.161336180934989	0.000471674969099003	-0.162758283778456
cg04676172	LEMD2	LEMD2	0.0146184182239628	0.752960916675955	0.0146194596671489
cg00334056	LEMD2	LEMD2	0.0200298558291791	0.66627412271026	0.0200325351009899
cg17800396	LEMD2	LEMD2	-0.0882321131915307	0.05700565659924	-0.0884621481950139
cg09667373	LEMD2	LEMD2	0.167194275943528	0.000288868533891469	0.168778851280253
cg15252951	LEMD2	LEMD2	-0.0606304879806576	0.191375982275159	-0.0607049459680035
cg23890282	LEMD2	LEMD2	-0.100051946946669	0.0308156545025799	-0.100387819669754
cg25303336	LEMD2	LEMD2	0.0120216746046431	0.795770526947747	0.0120222537816497
cg25922239	LEMD2	LEMD2	-0.14386747773092	0.00184855432613773	-0.144872572095705
cg05542986	LEMD2	LEMD2	-0.245140622546636	8.33879224577631e-08	-0.250236137742183
cg04598683	PRDM10	PRDM10	0.134879103478288	0.0035323357709441	0.135706072776146
cg07003579	PRDM10	PRDM10	0.0161116648747054	0.728672862962264	0.016113059211392
cg04181189	PRDM10	PRDM10	-0.0225901526485438	0.626678808447917	-0.022593996523456
cg15580075	PRDM10	PRDM10	0.0690810567852601	0.136479666443029	0.0691912618745914
cg02323334	PRDM10	PRDM10	0.0736498789534984	0.112338507240217	0.0737834805018831
cg11197563	PRDM10	PRDM10	-0.0582201319828461	0.20966439475548	-0.0582860467605111
cg09130549	UQCRB	UQCRB	0.00825523297300985	0.858934705693038	0.00825542050894837
cg21187239	UQCRB	UQCRB	-0.0499322774102263	0.282076704638185	-0.0499738371882794
cg13587908	FAM69B	FAM69B	-0.289876758050076	1.79150692657589e-10	-0.298431710606658
cg14172126	FAM69B	FAM69B	-0.488731294508679	2.37935158956041e-29	-0.534392130791516
cg00953282	FAM69B	FAM69B	-0.136105795489772	0.00324062626382643	-0.136955705977116
cg26944151	FAM69B	FAM69B	-0.329965622510331	2.68014624709242e-13	-0.34278967619518
cg14361654	FAM69B	FAM69B	-0.157136806162955	0.000663634168476504	-0.158449651204114
cg27370696	RNF5	RNF5	-0.0198023483733054	0.669839944209328	-0.0198049373672361
cg07482220	RNF5	RNF5	-0.0462943844593568	0.318663004443992	-0.0463274992980511
cg11995506	RNF5	RNF5	-0.247098123705342	6.52403206533372e-08	-0.252319860728121
cg26981651	RNF5	RNF5	-0.161324468745361	0.000472129844416297	-0.162746258603914
cg24195524	RNF5	RNF5	-0.177926024297579	0.000112723918088038	-0.179840089375471
cg10023837	RNF5	RNF5	0.0119077169393773	0.797664378685809	0.0119082798004354
cg11658047	RNF5	RNF5	0.0127332408201022	0.783972597799334	0.0127339290568463
cg21358678	RNF5	RNF5	-0.247205388453481	6.43649278595748e-08	-0.252434103905567
cg06570818	RNF5	RNF5	-0.0516069912749568	0.266228113552613	-0.0516528792741145
cg09615020	RNF5	RNF5	-0.188934656419354	4.04997161061177e-05	-0.191232157970353
cg09043226	RNF5	RNF5	-0.0708096466742011	0.126914919882229	-0.070928350654742
cg19007101	RNF5	RNF5	0.0193135048577956	0.67752684895936	0.0193159067816643
cg23027854	RNF5	RNF5	-0.302528320598774	2.55662133422627e-11	-0.312300303395477
cg25181749	CDK8	CDK8	-0.158473858147173	0.00059581169285409	-0.159820849715752
cg04761648	CDK8	CDK8	-0.234048371564735	3.22184447375425e-07	-0.238468191603113
cg26451873	CDK8	CDK8	0.0505595948935249	0.276066983526631	0.0506027424606854
cg17048363	CDK8	CDK8	-0.128895965782111	0.00532573391079756	-0.129617000343706
cg09391705	CDK8	CDK8	0.066767152885395	0.150139208009418	0.0668666318097169
cg23571288	CDK8	CDK8	0.129827740963298	0.00500118301888004	0.130564633759192
cg13433272	CDK8	CDK8	0.137197967148374	0.00299950514935154	0.138068660779677
cg12623375	CDK8	CDK8	-0.0186738653381705	0.687635629790745	-0.0186760364005054
cg12072964	LAMA1	LAMA1	-0.0680701660542462	0.142324750410351	-0.0681755947645904
cg18998321	LAMA1	LAMA1	-0.0952705259619409	0.03980540987033	-0.0955603460559521
cg07846220	LAMA1	LAMA1	-0.093038287955735	0.0447089626827784	-0.0933081411668353
cg23913679	LAMA1	LAMA1	-0.0941912013224247	0.0421164149105048	-0.0944712478083331
cg21628773	LAMA1	LAMA1	-0.105536469105166	0.0226987783425251	-0.105930928402029
cg06511678	LAMA1	LAMA1	-0.11139918639415	0.0161365748674172	-0.111863461342541
cg22455914	LAMA1	LAMA1	-0.089948680526895	0.0523256142963493	-0.0901924495416148
cg18764577	LAMA1	LAMA1	-0.100410668260564	0.0302175697693825	-0.100750181387664
cg01293417	TAF9B	TAF9B	-0.0564032899641395	0.22426037216611	-0.0564632169081225
cg07466166	TAF9B	TAF9B	-0.0660445216887172	0.154611338297135	-0.0661407998541515
cg00192980	TAF9B	TAF9B	-0.0891401544420745	0.0544884795298633	-0.0893773880829668
cg18626864	TAF9B	TAF9B	-0.0436692022432177	0.346907071520127	-0.0436969930933708
cg24585803	TAF9B	TAF9B	-0.0479730753408603	0.301412008728505	-0.0480099282429506
cg05605384	TAF9B	TAF9B	-0.0404322344597937	0.383850265145684	-0.040454288504206
cg11859478	TAF9B	TAF9B	-0.0449107932373168	0.333356518198352	-0.0449410245454854
cg01915804	TAF9B	TAF9B	-0.0655597497292275	0.157667490073426	-0.0656539197324666
cg05043048	PLK3	PLK3	-0.0718030234037176	0.121658472749972	-0.0719268041983577
cg27287808	PLK3	PLK3	0.0240724349897074	0.604226700190691	0.024077086455684
cg17233819	PLK3	PLK3	-0.355727009906502	2.39498587793693e-15	-0.371985297079471
cg12409601	PLK3	PLK3	0.00549787329988308	0.905778520924108	0.00549792869491326
cg08259083	PLK3	PLK3	-0.343400512584076	2.41733608513816e-14	-0.357942574993473
cg15619643	PLK3	PLK3	-0.0599696715467512	0.196269291924892	-0.0600417179464532
cg04899180	PLK3	PLK3	-0.0855952709270272	0.0648668283507634	-0.0858052340415998
cg14177943	PLK3	PLK3	-0.0700901206751258	0.130831081128577	-0.0702052356695968
cg21712663	PLK3	PLK3	0.00569342236093199	0.902443648556044	0.00569348387966752
cg27583604	PLK3	PLK3	-0.519612674302016	1.38533502934417e-33	-0.575809027391277
cg08136893	MPLKIP	MPLKIP	0.00186626638616087	0.96795042822266	0.00186626855286963
cg02976405	MPLKIP	MPLKIP	-0.37475628511392	5.5078340838155e-17	-0.393945114827429
cg00724098	MPLKIP	MPLKIP	0.142067084412895	0.00211084183981739	0.143034610969672
cg13565461	MPLKIP	MPLKIP	-0.141797202223645	0.00215296788256364	-0.142759180301252
cg23249624	MPLKIP	MPLKIP	-0.386097452813037	5.14998568408555e-18	-0.4072056459697
cg17321668	MPLKIP	MPLKIP	0.0530035925999289	0.253487208227651	0.053053312194606
cg23439458	MPLKIP	MPLKIP	-0.0946383087385294	0.0411457098302543	-0.0949223766606633
cg01083434	MPLKIP	MPLKIP	0.00241940734221394	0.958458866727444	0.00241941206292321
cg27402881	MPLKIP	MPLKIP	-0.345356358037346	1.68640265384613e-14	-0.360161588823399
cg04916200	RIC8B	RIC8B	-0.0803621924803824	0.0831088559330277	-0.0805358611275699
cg05510519	RIC8B	RIC8B	-0.12678280273892	0.00613306400473893	-0.127468727420871
cg10462751	RIC8B	RIC8B	-0.0349808207147182	0.451248846789429	-0.0349950993844231
cg06109136	RIC8B	RIC8B	-0.160120404340107	0.000521131004209135	-0.161510266247761
cg24053061	RIC8B	RIC8B	-0.174147892025474	0.000157998977426502	-0.175941126881978
cg16037021	RIC8B	RIC8B	-0.163087643034601	0.000408058125042637	-0.164557077515469
cg12808359	WNK4	WNK4	0.282835777682304	5.08147837104607e-10	0.290761751235589
cg03294458	WNK4	WNK4	0.231453684119754	4.37810896414539e-07	0.235724889234871
cg08108311	WNK4	WNK4	-0.15517396429589	0.000776243436499468	-0.156437749398214
cg18963509	WNK4	WNK4	0.265999064354428	5.47325376786623e-09	0.272553280156061
cg24104567	WNK4	WNK4	-0.150688160258941	0.00110308155087889	-0.151844510668017
cg02763536	WNK4	WNK4	-0.160728383319563	0.000495826503089265	-0.162134305514385
cg14886572	WNK4	WNK4	-0.357275405738554	1.77846112952586e-15	-0.373759136205596
cg16208357	WNK4	WNK4	-0.160084129355567	0.000522678083398701	-0.161473036975106
cg14457782	WNK4	WNK4	0.2517275993622	3.62097420423414e-08	0.257256435968851
cg23299262	WNK4	WNK4	-0.221672641729514	1.34723940355508e-06	-0.22541450594323
cg23103688	WNK4	WNK4	-0.202098182587283	1.10045968972087e-05	-0.204919120193807
cg05614735	WNK4	WNK4	0.248415436446117	5.52430308445011e-08	0.253723323044682
cg08409113	WNK4	WNK4	0.250960398618559	3.99531451235774e-08	0.256437499863714
cg11191571	LNPEP	LNPEP	-0.176489402152465	0.000128271405399742	-0.178356890686135
cg08175413	LNPEP	LNPEP	-0.239611677240864	1.64925251542014e-07	-0.244362096124745
cg22755475	LNPEP	LNPEP	0.110229234230375	0.0172943602637305	0.110678963655016
cg10936564	LNPEP	LNPEP	-0.0106276196398705	0.819017305416069	-0.010628019783757
cg07190450	MRPL22	MRPL22	0.0718157000644955	0.12159250790725	0.0719395465662316
cg05252892	MRPL22	MRPL22	0.00287876507860543	0.950580969594573	0.00287877303103049
cg22077101	MRPL22	MRPL22	-0.201937451289111	1.11869515072772e-05	-0.20475155016138
cg27295185	MRPL22	MRPL22	-0.319511263924288	1.60847787607339e-12	-0.331102711442779
cg13024389	MRPL22	MRPL22	-0.0168455442971074	0.716833175397821	-0.0168471380017677
cg20492933	MRPL22	MRPL22	-0.0164765072729364	0.722778584837595	-0.0164779985040505
cg00116058	MRPL22	MRPL22	-0.1872070493067	4.77455734151246e-05	-0.189441203117357
cg15534020	MRPL22	MRPL22	-0.288444768286357	2.21985606070784e-10	-0.29686906119329
cg04318855	DOCK10	DOCK10	-0.283995408074955	4.28829962654953e-10	-0.292022663867342
cg01636561	DOCK10	DOCK10	-0.0557372357141263	0.229788520183917	-0.0557950620381225
cg22640209	DOCK10	DOCK10	-0.283423686873666	4.66300224580716e-10	-0.291400895846704
cg08876662	DHDDS	DHDDS	-0.250299568691081	4.34750720246462e-08	-0.255732377359508
cg17836940	DHDDS	DHDDS	0.0553413611260286	0.233119640272159	0.0553979625462541
cg00792938	DHDDS	DHDDS	-0.157415245266	0.000648946429884042	-0.158735152394772
cg18234561	DHDDS	DHDDS	-0.148372149593438	0.00131764594568528	-0.149475530178901
cg22377913	DHDDS	DHDDS	-0.0690901084203163	0.136428175950389	-0.0692003569186352
cg02737609	DHDDS	DHDDS	-0.0480990782638289	0.300142637450342	-0.0481362225858226
cg10837265	DHDDS	DHDDS	-0.00338547702902473	0.941896568269373	-0.00338548996327755
cg03115835	DHDDS	DHDDS	-0.114556930689431	0.0133440144141907	-0.115062035162779
cg14211646	DHDDS	DHDDS	0.170400093110382	0.000219354714093043	0.172078692290099
cg18709722	DHDDS	DHDDS	0.107457682125285	0.0203309102495868	0.107874181701611
cg10005270	C10orf90	C10orf90	0.0790983846727928	0.0880850528664923	0.0792639678237553
cg09621603	C10orf90	C10orf90	0.154112645745118	0.000844257781068351	0.15535042792981
cg06132862	C10orf90	C10orf90	0.215522861465047	2.66221384974678e-06	0.21895608577913
cg14304336	C10orf90	C10orf90	0.159614921952582	0.000543077443491459	0.160991526057581
cg19403610	C10orf90	C10orf90	-0.372146498323445	9.3790516510276e-17	-0.39091235905979
cg24143287	C10orf90	C10orf90	0.107954892394041	0.0197542617959508	0.108377227638201
cg04507071	C10orf90	C10orf90	0.145402111262101	0.00164892415535484	0.14643999523623
cg06765475	C10orf90	C10orf90	0.138909399539438	0.00265432305745779	0.139813345256181
cg09225537	MGA	MGA	-0.0608352876404406	0.189877766846573	-0.0609105038253138
cg17516963	MGA	MGA	-0.0842079679374935	0.0693481449012077	-0.0844078581376977
cg09663530	MGA	MGA	0.0211137712776631	0.649389656622663	0.0211169095625643
cg17169931	MGA	MGA	-0.138442091488648	0.00274479247388144	-0.139336874199059
cg01459116	MGA	MGA	-0.0323386443440993	0.486176698415161	-0.0323499245441439
cg17895157	MGA	MGA	-0.102441620570668	0.0270156359151092	-0.102802244545378
cg17178280	MGA	MGA	-0.0345637860364435	0.456665892701377	-0.0345775598475513
cg15924985	MGA	MGA	-0.0325588057916775	0.483211734392482	-0.0325703180492923
cg00439706	MGA	MGA	-0.095057431417725	0.0402529841029631	-0.0953453040511792
cg18556005	MGA	MGA	-0.0570210153926038	0.21921864267568	-0.0570829355379074
cg22546696	MGA	MGA	-0.0978917723891422	0.0346355532056973	-0.0982062750650393
cg07713411	MGA	MGA	-0.0700081401590912	0.131283140891793	-0.0701228509012878
cg18958684	MGA	MGA	-0.0539084741995925	0.245461679200505	-0.0539607870092943
cg25826226	MGA	MGA	-0.0754170977649764	0.103954921455623	-0.075560571957306
cg24856258	MGA	MGA	-0.0749453457898002	0.10614284152846	-0.0750861383719778
cg18548879	MGA	MGA	-0.0879230575941339	0.0578840822987461	-0.0881506763016857
cg03448532	MGA	MGA	-0.13227342016034	0.00423240728986554	-0.133053050994587
cg17051178	MGA	MGA	0.307147208778909	1.22619858609881e-11	0.317392392092262
cg01770755	MGA	MGA	-0.13818570652783	0.00279561219713506	-0.139075488740853
cg09894439	MGA	MGA	0.126785830134112	0.00613183279999319	0.127471804274212
cg14795119	MGA	MGA	-0.0452266364335802	0.329964514646348	-0.0452575105873864
cg01054502	RMI2	RMI2	-0.030895350933858	0.505854417572378	-0.0309051866722271
cg00044050	RMI2	RMI2	-0.0652064054092547	0.159923669044653	-0.0652990583953894
cg02507033	RMI2	RMI2	-0.0750846854959797	0.105492848867823	-0.0752262666154074
cg00180470	RMI2	RMI2	-0.0798841523100807	0.0849637430491998	-0.0800547322337616
cg26882593	RMI2	RMI2	0.0961652713316884	0.0379717952441283	0.0964633648708096
cg05547152	RMI2	RMI2	-0.105949044852331	0.0221710597568595	-0.106348169550068
cg03940643	RMI2	RMI2	0.0160693609915317	0.729357354495571	0.0160707443727052
cg07312240	RMI2	RMI2	-0.18709675903774	4.82474852146817e-05	-0.189326909623168
cg00494521	RMI2	RMI2	0.0313789849124717	0.499214402507811	0.0313892900097432
cg20456954	ARFGEF1	ARFGEF1	0.025663315704449	0.580538717806115	0.0256689519344742
cg24353058	ARFGEF1	ARFGEF1	-0.267621904925809	4.38332945711877e-09	-0.274300502181194
cg04856096	ARFGEF1	ARFGEF1	0.180206785314423	9.1628983913149e-05	0.182196406327489
cg01086978	ARFGEF1	ARFGEF1	0.254863716198877	2.41386340684204e-08	0.260607560036354
cg03346041	ARFGEF1	ARFGEF1	0.229287443197311	5.64012232348896e-07	0.233437240324826
cg07241733	ARFGEF1	ARFGEF1	-0.384455798060575	7.29924918843727e-18	-0.405277829042826
cg05135541	VPS45	VPS45	-0.158537259471195	0.000592761206987453	-0.159885884986738
cg04643103	VPS45	VPS45	0.127917205157573	0.00568695472923718	0.128621831032819
cg01522975	VPS45	VPS45	0.0588750336470844	0.204574993221694	0.0589432010548342
cg26352401	VPS45	VPS45	-0.265494311146504	5.86287164043273e-09	-0.272010171922493
cg07909059	VPS45	VPS45	0.105139660084669	0.0232165592649786	0.105529666935521
cg01764116	VPS45	VPS45	0.153538769838066	0.000883289745165215	0.154762643648631
cg07231649	VPS45	VPS45	-0.23428796951741	3.13132283241045e-07	-0.238721690078252
cg08205655	USP18	USP18	-0.148950226798239	0.00126076333427065	-0.150066671717666
cg02518889	USP18	USP18	-0.0998163994868381	0.0312138614274739	-0.100149896104444
cg07964128	USP18	USP18	-0.0263510833245236	0.570433961437153	-0.026357185085054
cg01246421	USP18	USP18	0.0308106787535963	0.507021664914603	0.0308204338149473
cg10685559	USP18	USP18	-0.253752673897526	2.78852055773605e-08	-0.259419695202801
cg26021103	LPCAT3	LPCAT3	-7.71463130654962e-05	0.998674804253112	-7.71463132186012e-05
cg26651188	LPCAT3	LPCAT3	0.171553967218714	0.0001984221739224	0.173267313687677
cg01941018	LPCAT3	LPCAT3	0.0298664859427583	0.520132778093404	0.0298753710699358
cg17842066	LPCAT3	LPCAT3	0.00652914373190247	0.888211385858797	0.00652923651279399
cg12063138	LPCAT3	LPCAT3	0.0539517707850642	0.245082179743592	0.0540042098883978
cg14870383	LPCAT3	LPCAT3	0.0685616378672944	0.139459511310834	0.0686693710726354
cg05170326	LPCAT3	LPCAT3	-0.147940324982832	0.00136166734159356	-0.149034014164814
cg04799218	LPCAT3	LPCAT3	-0.0581375357901953	0.210312702907154	-0.0582031700486482
cg14292572	CAND1	CAND1	-0.0891925236405232	0.0543461714948977	-0.0894301769867879
cg15993795	CAND1	CAND1	0.0184989924401712	0.690409106878301	0.018501103070407
cg04956790	CAND1	CAND1	0.0682354278431659	0.141356302858738	0.0683416277444998
cg08602446	CAND1	CAND1	0.211548162495283	4.09166174002112e-06	0.214791485261188
cg02063925	CAND1	CAND1	0.027038604678505	0.560417088682365	0.02704519675344
cg17524854	CAND1	CAND1	0.150991665083587	0.0010774853720878	0.152155081821101
cg16321806	CAND1	CAND1	0.108046571853878	0.0196495037528278	0.10846998908226
cg27610961	CAND1	CAND1	0.183899572516035	6.51622608250918e-05	0.186015785524054
cg04757074	CAND1	CAND1	0.185836009129907	5.43506585369241e-05	0.188020744532867
cg06515732	CAND1	CAND1	-0.173346078335935	0.000169585034708742	-0.175114354526477
cg10901018	CAND1	CAND1	0.0125848206744405	0.786429454015555	0.0125854851226143
cg25691060	CAND1	CAND1	0.195077803424869	2.22873051960365e-05	0.19761047359216
cg07101926	CAPN3	CAPN3	-0.298367395333897	4.90161760593778e-11	-0.307726496307569
cg23198793	CAPN3	CAPN3	-0.337841067913168	6.63542203127414e-14	-0.351653422252817
cg14833933	CAPN3	CAPN3	0.159413157674989	0.0005520746742493	0.160784493902145
cg18425651	CAPN3	CAPN3	-0.493492092148632	5.64161024335375e-30	-0.540666203246446
cg06320570	CAPN3	CAPN3	-0.370030572797237	1.43899232816756e-16	-0.388458522262552
cg15775674	CAPN3	CAPN3	-0.300590762779352	3.46623024159986e-11	-0.310168920620658
cg22054740	CAPN3	CAPN3	-0.440593201052004	1.49642182096734e-23	-0.472966659112112
cg07576135	CAPN3	CAPN3	-0.34775775139261	1.080085414168e-14	-0.362890762904555
cg21670405	CAPN3	CAPN3	-0.25544463520423	2.23785469672451e-08	-0.261228932694182
cg14511094	CAPN3	CAPN3	-0.398314062507361	3.61007303458759e-19	-0.421643469098331
cg01904619	TRAF3IP2	TRAF3IP2	-0.154271643226337	0.000833729247195123	-0.15551329767501
cg05423393	TRAF3IP2	TRAF3IP2	-0.155455952041337	0.000759044819900903	-0.156726707608452
cg24634333	TRAF3IP2	TRAF3IP2	-0.123953208209869	0.00738569464385632	-0.124593947542596
cg21699035	TRAF3IP2	TRAF3IP2	-0.181519660615425	8.12334583202661e-05	-0.183553680325563
cg06380725	TRAF3IP2	TRAF3IP2	-0.348847418899385	8.81259769635874e-15	-0.364130874336785
cg03270395	TRAF3IP2	TRAF3IP2	-0.146323399461028	0.00153878376455366	-0.147381310886014
cg25282285	TRAF3IP2	TRAF3IP2	-0.161136049681884	0.000479503912346465	-0.162552810826828
cg00590039	TRAF3IP2	TRAF3IP2	-0.200425460641649	1.30490022903451e-05	-0.203175781538124
cg11572080	TRAF3IP2	TRAF3IP2	-0.49586374953368	2.73113730360864e-30	-0.543806254054192
cg19118533	TRAF3IP2	TRAF3IP2	-0.16163833248587	0.000460079998341133	-0.163068525866726
cg26379258	TRAF3IP2	TRAF3IP2	-0.146354464813451	0.00153519041893581	-0.147413056064065
cg15772366	TRAF3IP2	TRAF3IP2	-0.194387478365063	2.3856909373046e-05	-0.196892939013073
cg27428856	TRAF3IP2	TRAF3IP2	-0.163464671184488	0.000395452587243916	-0.16494443219904
cg10566589	TRAF3IP2	TRAF3IP2	-0.149738575141822	0.0011868290325189	-0.150873004348313
cg21044968	TRAF3IP2	TRAF3IP2	-0.303572060712095	2.16794738835777e-11	-0.313449593819014
cg26904406	TRAF3IP2	TRAF3IP2	-0.166188405082937	0.000314608310595614	-0.16774423239912
cg26079320	POGK	POGK	-0.125063801262319	0.00686906948724709	-0.125722028646423
cg22131237	POGK	POGK	0.12978801218339	0.0050146488053223	0.130524224072632
cg24429881	POGK	POGK	0.120579684230985	0.00917457431873686	0.121169223633623
cg21959874	POGK	POGK	-0.0199375998091935	0.667719190342883	-0.0199402422238356
cg10505921	POGK	POGK	-0.442602186871331	8.93381405104055e-24	-0.475462322147366
cg02564102	SMARCC1	SMARCC1	0.201194706390634	1.20676092362785e-05	0.203977350346711
cg02627110	SMARCC1	SMARCC1	-0.00680550901413469	0.883512572680124	-0.0068056140826644
cg16250355	SMARCC1	SMARCC1	0.1396836119786	0.0025103990711632	0.140602877438645
cg07143957	SMARCC1	SMARCC1	0.175572508961311	0.000139224384691115	0.177410677200083
cg20685352	SMARCC1	SMARCC1	-0.0805399276952338	0.0824276050795261	-0.0807147542056454
cg22984439	SMARCC1	SMARCC1	0.00796704304621695	0.863810470193944	0.00796721161873586
cg07474652	SMARCC1	SMARCC1	-0.0087260474722907	0.850980798463969	-0.00872626896085156
cg12894336	SMARCC1	SMARCC1	-0.113594362205447	0.0141463417901349	-0.114086775296025
cg23698058	PRKACB	PRKACB	-0.220460866806307	1.5431408577773e-06	-0.224140467945578
cg00341980	PRKACB	PRKACB	0.17925552966257	9.99302576711882e-05	0.181213396129111
cg06444730	PRKACB	PRKACB	-0.198645913256697	1.56182851298645e-05	-0.201322443888977
cg16374471	PRKACB	PRKACB	-0.211703738918703	4.02401948964445e-06	-0.214954355936639
cg15704369	PRKACB	PRKACB	-0.0515392272650786	0.266857291644605	-0.0515849345458
cg27043582	HOOK3	HOOK3	-0.0652302074720332	0.159770927520368	-0.0653229621309753
cg08507009	HOOK3	HOOK3	-0.266274627852909	5.27126660924643e-09	-0.27284984929974
cg16103681	HOOK3	HOOK3	-0.295892120197774	7.18386977332038e-11	-0.305011525042856
cg20223364	HOOK3	HOOK3	0.0156145891996492	0.736729200437418	0.0156158584110754
cg15193596	HOOK3	HOOK3	-0.0323042009423722	0.486641440990312	-0.0323154451226457
cg04498023	HOOK3	HOOK3	-0.102727299185807	0.0265895422444	-0.10309096149601
cg05966149	HOOK3	HOOK3	-0.0130121219889775	0.779361988576215	-0.0130128564474522
cg12864541	HOOK3	HOOK3	-0.115557533659993	0.0125527493602604	-0.116076062079826
cg00741600	HOOK3	HOOK3	-0.213828268070744	3.20077775603061e-06	-0.217179622505057
cg10355174	HOOK3	HOOK3	-0.172226295027338	0.00018710367596366	-0.173960111067417
cg25080524	DHX15	DHX15	-0.146440952055907	0.00152522693251315	-0.147501437523566
cg11410731	DHX15	DHX15	-0.208453825721798	5.68555455676181e-06	-0.211554388091375
cg12847279	DHX15	DHX15	-0.146153334520025	0.00155859246544072	-0.147207529515249
cg18997433	DHX15	DHX15	-0.12386852792978	0.00742647636248782	-0.124507946815613
cg27034413	DHX15	DHX15	-0.0302088123948871	0.515359161921461	-0.030218006671947
cg08741531	DHX15	DHX15	-0.0447611362321081	0.334971566009932	-0.0447910660839378
cg10250534	DHX15	DHX15	0.0370266760228494	0.425205483246401	0.0370436108344974
cg22968281	DHX15	DHX15	0.0305005845895374	0.511308477144538	0.0305100479577722
cg21302120	DHX15	DHX15	0.139217472897739	0.00259617576619687	0.14012749382298
cg17079378	RAD54L	RAD54L	-0.0763595197955366	0.0996911419148563	-0.0765084529397896
cg01963221	RAD54L	RAD54L	-0.0764353587400553	0.0993541607834836	-0.0765847371222192
cg24325883	RAD54L	RAD54L	-0.0512340707681633	0.26970324886263	-0.0512789701205883
cg04131943	RAD54L	RAD54L	-0.12789640602404	0.00569486429742895	-0.128600685962747
cg21294209	RAD54L	RAD54L	-0.077475670333197	0.0948225154407691	-0.0776312463981748
cg20388062	RAD54L	RAD54L	-0.0635600271851403	0.170757859863861	-0.0636458268185051
cg00645897	RAD54L	RAD54L	-0.0780636516295737	0.092335194504747	-0.0782228055327422
cg07449543	CHORDC1	CHORDC1	-0.16989630340013	0.000229127260167449	-0.171559882821052
cg26138821	CHORDC1	CHORDC1	-0.0386834821376687	0.404770999774331	-0.0387027949535118
cg09488196	CHORDC1	CHORDC1	-0.0672089296431775	0.147454038258854	-0.067310399938917
cg00409521	CHORDC1	CHORDC1	0.005174235066947	0.911301424447646	0.00517428124378455
cg10363578	CHORDC1	CHORDC1	-0.202601921221188	1.0451238642625e-05	-0.20544436528651
cg26028595	CHORDC1	CHORDC1	-0.0621839422708637	0.180226246458817	-0.0622642805873626
cg01186595	CHORDC1	CHORDC1	-0.34728292092146	1.17991751053883e-14	-0.362350710023881
cg01796225	CHORDC1	CHORDC1	-0.280601495733717	7.03141004412629e-10	-0.288334856479842
cg20448129	CHORDC1	CHORDC1	-0.0491736170130364	0.289462035911723	-0.0492133092821029
cg24247865	CHORDC1	CHORDC1	-0.0518679460505742	0.26381469949894	-0.0519145344407985
cg22650867	CHORDC1	CHORDC1	-0.197576411779965	1.73864784694837e-05	-0.20020925168475
cg20511541	DENND5A	DENND5A	0.0601350127545019	0.195036463355918	0.0602076575799993
cg12894917	DENND5A	DENND5A	-0.120658130605978	0.00912894549444915	-0.121248828168738
cg11624479	DENND5A	DENND5A	-0.149101044701989	0.00124629925064828	-0.150220915158809
cg12942165	DENND5A	DENND5A	0.0226924666648876	0.625117606920851	0.022696363015912
cg13173567	DENND5A	DENND5A	0.0200307929764496	0.666259449868483	0.0200334726244077
cg12850793	DENND5A	DENND5A	-0.00295924528273828	0.949201223206624	-0.00295925392095148
cg17543520	DENND5A	DENND5A	-0.0553090923364689	0.233392665679578	-0.0553655946825218
cg24094746	DENND5A	DENND5A	-0.0714936179836695	0.123277172747557	-0.0716158022529326
cg10698677	DENND5A	DENND5A	-0.175403818837471	0.000141332813083948	-0.177236627009457
cg07331747	ATP6V0E1	ATP6V0E1	-0.0294137872794845	0.526480206752425	-0.0294222743363354
cg08267245	ATP6V0E1	ATP6V0E1	-0.0493038151317205	0.288185454224892	-0.0493438238271133
cg02589459	ATP6V0E1	ATP6V0E1	-0.0542808707421137	0.242210992882694	-0.0543342764735983
cg20225275	ATP6V0E1	ATP6V0E1	-0.0490250764343503	0.290923093362248	-0.0490644097441975
cg26522389	ATP6V0E1	ATP6V0E1	0.000918348334624843	0.984225910598669	0.000918348592792235
cg08233173	ATP6V0E1	ATP6V0E1	-0.00998135292454488	0.829849601489232	-0.00998168441646125
cg14130374	ATP6V0E1	ATP6V0E1	-0.0497817927919141	0.283531406130409	-0.0498229775743244
cg12811552	ATP6V0E1	ATP6V0E1	-0.0652310314433851	0.1597656419385	-0.065323789623335
cg06909976	ATP6V0E1	ATP6V0E1	-0.0459387458711135	0.322398842924374	-0.0459711027440738
cg01212978	N4BP1	N4BP1	0.201270211728376	1.19751588816075e-05	0.20405604227499
cg07267515	N4BP1	N4BP1	-0.103012508238565	0.0261699335632454	-0.103379220975193
cg04721812	N4BP1	N4BP1	-0.126314088938802	0.00632638248700566	-0.126992385225013
cg06642941	N4BP1	N4BP1	0.106051480613386	0.0220416960204556	0.106451769364502
cg26612252	N4BP1	N4BP1	-0.214506696506629	2.97371844421014e-06	-0.217890664858246
cg27470012	N4BP1	N4BP1	-0.160213620887802	0.000517174933990172	-0.161605937084662
cg16419098	N4BP1	N4BP1	-0.298175115021196	5.05001709893684e-11	-0.307515439136177
cg22548015	PDRG1	PDRG1	-0.143818033464134	0.00185533962928086	-0.144822083175879
cg01258499	PDRG1	PDRG1	-0.17712004376114	0.000121213510266771	-0.179007882257131
cg10211877	PDRG1	PDRG1	-0.230894207397891	4.67520074330066e-07	-0.235133825209102
cg01819995	PDRG1	PDRG1	-0.116602945354258	0.0117705637689641	-0.117135752807876
cg22384157	PDRG1	PDRG1	-0.0732029037508325	0.114540967094878	-0.0733340823908922
cg20979896	PDRG1	PDRG1	0.0225678634934852	0.627019138488019	0.0225716959993304
cg08668662	PDRG1	PDRG1	-0.182949602382033	7.11797200958676e-05	-0.185032741192891
cg12910951	PDRG1	PDRG1	-0.125422322982888	0.00670934140546839	-0.126086263698283
cg11189139	PDRG1	PDRG1	-0.00616996377634155	0.894324061383241	-0.00617004207178858
cg06931398	PDRG1	PDRG1	-0.127759556092005	0.00574715314540735	-0.12846156275833
cg18245660	RGS20	RGS20	-0.071756044531409	0.121903177372188	-0.0718795820231562
cg02779564	RGS20	RGS20	-0.0714506473729195	0.123503299342769	-0.0715726110098279
cg01450642	RGS20	RGS20	-0.0664372786099523	0.152168341207215	-0.0665352877369067
cg12164472	RGS20	RGS20	-0.0924945151461738	0.0459775549581185	-0.0927596482295856
cg04761198	RGS20	RGS20	-0.24689163530365	6.69579608424097e-08	-0.252099956760533
cg10205753	RGS20	RGS20	-0.023689909917962	0.609986309754738	-0.0236943430967436
cg07124686	RGS20	RGS20	-0.0433786665796308	0.35012770184131	-0.0434059060118952
cg02739708	RGS20	RGS20	0.0195263032555923	0.674176490710042	0.0195287854637719
cg05868512	RGS20	RGS20	-0.241445412733556	1.31779903515267e-07	-0.246308435795008
cg13072625	RGS20	RGS20	-0.376171722103876	4.11834362273653e-17	-0.395592836965204
cg00582628	RGS20	RGS20	-0.367771670347048	2.26471941931888e-16	-0.38584378330691
cg10341556	RGS20	RGS20	-0.0126972966076874	0.784567400370986	-0.0126979790320975
cg27332111	EIF3I	EIF3I	0.00136443822450035	0.97656544657147	0.00136443907122239
cg18270627	EIF3I	EIF3I	-0.0325489531554801	0.4833442125728	-0.0325604549606366
cg22112460	EIF3I	EIF3I	0.117445524196504	0.0111718259910001	0.117990030759407
cg07361759	EIF3I	EIF3I	0.179313874734221	9.9401379870485e-05	0.181273678869162
cg26219182	EIF3I	EIF3I	-0.0103869706141511	0.823047000783247	-0.010387344185507
cg07656362	EIF3I	EIF3I	0.168313491555688	0.000262546037020304	0.169930475298997
cg05950833	EIF3I	EIF3I	0.123725976116002	0.00749558368750875	0.124363176283196
cg14995716	EIF3I	EIF3I	0.0530436798855453	0.25312785753235	0.0530935125036378
cg21931991	EIF3I	EIF3I	-0.173608570458836	0.000165707123053508	-0.175384991297517
cg14992253	EIF3I	EIF3I	-0.0499132269493312	0.282260581785096	-0.0499547391296515
cg16529530	EIF3I	EIF3I	-0.0702754020521395	0.129813830381842	-0.0703914341903099
cg26821750	EIF3I	EIF3I	-0.225554769770421	8.67578375095873e-07	-0.229500976341583
cg08129048	EIF3I	EIF3I	-0.0191363159244924	0.680321424421604	-0.0191386523351531
cg05350266	EIF3I	EIF3I	-0.00816301486325828	0.860494331107869	-0.00816319618416041
cg24225259	TTLL4	TTLL4	-0.0560782359312359	0.226946317690466	-0.0561371314563916
cg03488522	TTLL4	TTLL4	0.069989393054933	0.131386686199399	0.0701040114872533
cg03765692	TTLL4	TTLL4	-0.0181247970225421	0.696357728672695	-0.0181267821290517
cg00665395	TTLL4	TTLL4	0.11603434280714	0.0121904798089748	0.116559351519403
cg01827633	TTLL4	TTLL4	-0.345682293295953	1.58779707941399e-14	-0.360531710553237
cg06321424	TTLL4	TTLL4	-0.0586375519384699	0.206410070517089	-0.0587048966463116
cg14611830	TTLL4	TTLL4	0.0269201320789227	0.562137107816854	0.0269266378563195
cg02176678	TTLL4	TTLL4	-0.209829592034253	4.91488494592632e-06	-0.212993083578887
cg14120224	TTLL4	TTLL4	-0.0791010924781229	0.088074140501002	-0.0792666926778671
cg18485154	TTLL4	TTLL4	-0.102334084346995	0.0271775429155993	-0.102693569046748
cg23467443	HMGB2	HMGB2	-0.0550890763130848	0.235260239663688	-0.0551449062340156
cg02666901	HMGB2	HMGB2	-0.0352754146077516	0.44744418374698	-0.0352900572530826
cg11186122	HMGB2	HMGB2	-0.0846206379415827	0.0679893936657601	-0.0848234898456979
cg03002428	HMGB2	HMGB2	0.0150056970866233	0.746637162892351	0.0150068235211427
cg05944369	HMGB2	HMGB2	-0.0249745024528873	0.590741814008975	-0.0249796968105528
cg23860479	HMGB2	HMGB2	0.0308107432945226	0.507020774649543	0.0308204984172005
cg23199053	HMGB2	HMGB2	0.0443845493125693	0.339057753802884	0.0444137294908377
cg19091677	HMGB2	HMGB2	-0.0868876278141022	0.0609091594291505	-0.0871072751601923
cg25086702	HMGB2	HMGB2	-0.010721973409983	0.817438633911501	-0.0107223843068978
cg24448859	HMGB2	HMGB2	-0.0696622054985793	0.133204010132616	-0.0697752208624491
cg22517161	HMGB2	HMGB2	-0.12542644703242	0.0067075235883685	-0.12609045366128
cg14705778	HMGB2	HMGB2	-0.0441129266507497	0.342024721783069	-0.0441415739601893
cg20409358	HMGB2	HMGB2	-0.0726034159771251	0.117547937922511	-0.0727313913739109
cg16569664	HMGB2	HMGB2	-0.118753738978003	0.0102955708770985	-0.119316750190582
cg21499459	HMGB2	HMGB2	-0.258203559552006	1.55799310913784e-08	-0.264182684852038
cg08269316	HMGB2	HMGB2	-0.172339217483769	0.000185263037419786	-0.174076487740532
cg13515674	HMGB2	HMGB2	0.0437606910224521	0.345896808586454	0.0437886570421604
cg00321931	HMGB2	HMGB2	0.0320385541001987	0.490233823609425	0.0320495230502133
cg09162056	HMGB2	HMGB2	-0.0615045619926039	0.18504175881334	-0.0615822918723727
cg24551570	HMGB2	HMGB2	-0.0459003727852683	0.322803632037633	-0.0459326485735317
cg19371349	HMGB2	HMGB2	-0.259930020772198	1.23942120357835e-08	-0.266033355541174
cg06841464	HMGB2	HMGB2	-0.107927717763192	0.0197854062910632	-0.108349732654349
cg03124231	HMGB2	HMGB2	-0.0645043252532754	0.164478679191121	-0.0645940126334948
cg27164753	HMGB2	HMGB2	-0.126400319772077	0.00629041189800938	-0.127080015170596
cg15930798	UBE2N	UBE2N	-0.121149708392526	0.00884758557837486	-0.121747698329081
cg01861284	UBE2N	UBE2N	-0.0335214884260745	0.470362778282079	-0.03353405282078
cg05909892	UBE2N	UBE2N	0.0237783113450408	0.608653107125252	0.0237827943491788
cg02386416	UBE2N	UBE2N	-0.0648226985822882	0.162401186120818	-0.0649137227916451
cg11084718	UBE2N	UBE2N	-0.135299428432689	0.00342980298517977	-0.136134210876513
cg18350524	UBE2N	UBE2N	-0.0063670557220014	0.890969069588553	-0.0063671417629641
cg11957880	UBE2N	UBE2N	-0.0283335040768539	0.54178489792775	-0.0283410896581484
cg09181473	UBE2N	UBE2N	0.0105611782075532	0.820129403526703	0.0105615708931061
cg14790421	UBE2N	UBE2N	0.0834964339183186	0.0717430893102352	0.0836912857295369
cg04561571	UBE2N	UBE2N	-0.151346894723069	0.00104822300001164	-0.152518619073006
cg01398432	FAM185A	FAM185A	0.0804855542365337	0.0826355352571288	0.080660025982088
cg05286874	ABCA1	ABCA1	-0.129707007119269	0.00504220617648728	-0.130441831985776
cg21572316	ABCA1	ABCA1	-0.17240044424593	0.000184272147024979	-0.174139589336872
cg14491628	ABCA1	ABCA1	-0.165084748233289	0.00034530421744579	-0.166609441904442
cg14470647	ABCA1	ABCA1	-0.164010236677576	0.000377853065643775	-0.165505027234579
cg14170545	ABCA1	ABCA1	-0.307971327146103	1.07406978427738e-11	-0.318302610557755
cg14630985	ABCA1	ABCA1	-0.169217650815596	0.000242936682074409	-0.170861141700834
cg26096979	NIF3L1	NIF3L1	0.018955527247854	0.683177291081363	0.01895779805365
cg04637597	NIF3L1	NIF3L1	-0.0727191487689394	0.116962673536156	-0.0728477384390312
cg11229815	NIF3L1	NIF3L1	-0.0848582187111735	0.0672170882828432	-0.0850627889685801
cg02298949	NIF3L1	NIF3L1	-0.170637326735949	0.000214889194822024	-0.172323030447245
cg10089247	NIF3L1	NIF3L1	-0.145160387879007	0.00167899609258875	-0.146193059875706
cg23598054	NIF3L1	NIF3L1	0.056977991733476	0.219567141402062	0.0570397716417171
cg04129946	NIF3L1	NIF3L1	0.0187811161147083	0.685936703961745	0.0187833248052185
cg10762533	NIF3L1	NIF3L1	0.0828289506659412	0.0740507546167063	0.0830191539657896
cg12465398	NIF3L1	NIF3L1	-0.168371504272638	0.000261244727629688	-0.169990179999204
cg07434465	NIF3L1	NIF3L1	-0.045608638194056	0.325891873041826	-0.0456403019599682
cg09848789	MCOLN2	MCOLN2	-0.0290796596539082	0.531190279545912	-0.0290878606599321
cg20804700	MCOLN2	MCOLN2	-0.081978674748714	0.0770775917936198	-0.0821630648177987
cg22168369	MCOLN2	MCOLN2	-0.0128921945246882	0.781343754345484	-0.0128929088608035
cg11262906	MCOLN2	MCOLN2	-0.173794614602239	0.000163009136086109	-0.175576823447844
cg01413809	MCOLN2	MCOLN2	-0.0995483353980868	0.031672386295626	-0.0998791416421533
cg09369316	MCOLN2	MCOLN2	0.0407572742990693	0.3800357356058	0.0407798648747648
cg02621376	MCOLN2	MCOLN2	-0.581748385421536	1.49732037399203e-43	-0.665101443546684
cg08367673	MUT	MUT	-0.077551346438968	0.0944994157275175	-0.0777073799404939
cg15002204	MUT	MUT	0.0687298621942298	0.138489011556518	0.0688383918663525
cg10568944	MUT	MUT	0.167983120053425	0.000270072962239509	0.16959049113098
cg25098095	VTA1	VTA1	0.051062047452262	0.271316691994812	0.0511064955895056
cg02013961	VTA1	VTA1	-0.10924459660646	0.0183243889742073	-0.109682324224669
cg17831680	VTA1	VTA1	-0.230215141362293	5.06188210697836e-07	-0.234416636653709
cg25919202	VTA1	VTA1	-0.304038588124414	2.01346804440972e-11	-0.313963559039392
cg19004134	VTA1	VTA1	-0.290954876274794	1.52326115233998e-10	-0.299609134504839
cg17786216	VTA1	VTA1	-0.113998899767745	0.0138041194083822	-0.114496620222071
cg24578337	VTA1	VTA1	-0.301079113639775	3.21093863596816e-11	-0.310705865938632
cg13401290	VTA1	VTA1	-0.238846809424227	1.81007739317523e-07	-0.243550797104184
cg03265892	VTA1	VTA1	-0.109696934596066	0.0178447325508845	-0.110140148721884
cg04399615	VTA1	VTA1	-0.27499886567636	1.5675998839785e-09	-0.282263674244374
cg03856286	ZCCHC17	ZCCHC17	-0.218647303927256	1.88810753182003e-06	-0.222235055966295
cg17748167	ZCCHC17	ZCCHC17	0.0399344179137608	0.389737522012924	0.0399556668235292
cg03605784	ZCCHC17	ZCCHC17	-0.229615623751451	5.4286621821527e-07	-0.233783659142851
cg20410415	ZCCHC17	ZCCHC17	-0.263271314817284	7.92315962116178e-09	-0.269620113349393
cg11531932	ZCCHC17	ZCCHC17	0.0641635146538252	0.166724624912697	0.0642517856032182
cg12418357	ZCCHC17	ZCCHC17	-0.0481844657153998	0.299284454456166	-0.0482218083937
cg08831348	EML2	EML2	-0.196116913025357	2.01081546068082e-05	-0.19869091935203
cg01544351	EML2	EML2	-0.0489763948273763	0.291403003473717	-0.0490156109678337
cg27301343	EML2	EML2	-0.14566193249406	0.00161715221154829	-0.14670543844262
cg12536502	EML2	EML2	-0.0741404542469574	0.109959670077135	-0.0742767492975636
cg06381803	EML2	EML2	0.000360631780105568	0.993805236888718	0.000360631795739596
cg09559882	EML2	EML2	-0.19527620262784	2.18546491901597e-05	-0.197816729938049
cg06396649	EML2	EML2	0.133581269668727	0.0038667092673107	0.134384425669571
cg17286480	EML2	EML2	-0.0585408514983224	0.207160701109557	-0.0586078631196285
cg03096975	EML2	EML2	-0.0644102135951386	0.165096593686014	-0.0644995083345356
cg20427879	EML2	EML2	-0.0930563769355917	0.0446672729888226	-0.0933263881253205
cg18358136	EML2	EML2	0.146628583868035	0.00150381520230776	0.147693186657743
cg07804711	EML2	EML2	-0.0508090495234192	0.273701565912545	-0.0508528395664746
cg25706898	EML2	EML2	0.0576945886306451	0.213814129782801	0.0577587321167954
cg08845291	EML2	EML2	0.186813503617961	4.95594752966717e-05	0.189033395220848
cg04098028	KATNB1	KATNB1	-0.222402096066716	1.24105649982837e-06	-0.22618178777075
cg09653605	KATNB1	KATNB1	0.124133543767498	0.0072995122975369	0.124777101242617
cg03992022	KATNB1	KATNB1	-0.145264965660564	0.00166592475502874	-0.146299890362082
cg15153383	KATNB1	KATNB1	-0.153916891771472	0.00085738906617461	-0.15514991774377
cg02164462	KATNB1	KATNB1	0.137007286989885	0.00304038958606985	0.137874327716637
cg07821328	KATNB1	KATNB1	0.0350836009669429	0.449919377534257	0.0350980059293925
cg03029127	KATNB1	KATNB1	-0.2441994795673	9.37620524494725e-08	-0.249235067146731
cg00816177	KATNB1	KATNB1	-0.220045947048626	1.61628424089599e-06	-0.223704393528704
cg03852056	KATNB1	KATNB1	-0.221298680243667	1.40499876384606e-06	-0.225021253079473
cg01656750	KATNB1	KATNB1	-0.101286265812546	0.0287993181307982	-0.101634775688126
cg00439196	KATNB1	KATNB1	-0.191068016653442	3.29834151440038e-05	-0.193445419017502
cg00396981	KATNB1	KATNB1	-0.111491112812515	0.0160485507486952	-0.111956543847677
cg06830769	KATNB1	KATNB1	-0.295247251989724	7.93139543341247e-11	-0.304304927415155
cg06946541	KATNB1	KATNB1	-0.306761447671023	1.30444987642716e-11	-0.316966503328926
cg23510153	ZNF248	ZNF248	0.0387242463591333	0.404275720412382	0.0387436203309527
cg24389632	ZNF248	ZNF248	-0.0761254378812091	0.100736990215261	-0.076273002370077
cg25005433	ZNF248	ZNF248	0.0503786946371628	0.277791012638789	0.0504213802498663
cg07640605	ZNF248	ZNF248	-0.192106375649128	2.98226017968342e-05	-0.194523344068467
cg10031769	CREM	CREM	-0.354535545959015	3.00804616582571e-15	-0.370621881300151
cg00937932	CREM	CREM	0.0547667619749524	0.238015155245292	0.0548216165032654
cg00094817	CREM	CREM	0.0542917829505707	0.24211619651988	0.0543452209354422
cg02972356	CREM	CREM	-0.206804976953228	6.76138360445604e-06	-0.209831254633308
cg04310649	CREM	CREM	0.0410703664427543	0.376383462827296	0.0410934819974939
cg27509202	CREM	CREM	-0.0675090860523711	0.14565063423255	-0.0676119244382102
cg09351894	CREM	CREM	0.0450871113230908	0.331460190843052	0.0451177003836338
cg23593958	CREM	CREM	-0.112893793274533	0.014756670846207	-0.113377105370515
cg07998461	CREM	CREM	0.0136551478415849	0.768760840586802	0.0136559966634468
cg19215266	CREM	CREM	-0.165686130163517	0.000328247974670351	-0.167227735637983
cg09797645	CREM	CREM	-0.0166574733592311	0.719861001090526	-0.0166590142733634
cg19505862	CREM	CREM	-0.168420041715189	0.000260160596340041	-0.170040133994007
cg06782748	CREM	CREM	-0.0267668133958505	0.564366798931877	-0.0267732086161271
cg04943713	CREM	CREM	-0.00315563118261473	0.945835044010622	-0.00315564165727765
cg00461005	CREM	CREM	-0.170478930835383	0.000217861182542974	-0.172159888741802
cg26273724	CREM	CREM	-0.188889814886095	4.06738655671119e-05	-0.191185656915204
cg17426923	CREM	CREM	0.133257551546028	0.00395445922234637	0.1340548406875
cg06336792	CREM	CREM	0.104001392315642	0.0247589391498548	0.104378814470851
cg14182120	CREM	CREM	0.156776372480544	0.000683104786916042	0.158080113826939
cg02651820	CREM	CREM	-0.139790508091521	0.00249109641866497	-0.140711902422125
cg07870757	CREM	CREM	-0.0235705464860676	0.611788505815938	-0.0235749129763986
cg04251571	CREM	CREM	-0.0459342344126018	0.322446416162844	-0.0459665817455266
cg07891983	CREM	CREM	-0.130722876568024	0.00470629545065695	-0.131475223647325
cg19033615	CREM	CREM	0.183967474727028	6.47510550381186e-05	0.186086065411996
cg03585969	CREM	CREM	-0.0279565515784295	0.54717690044932	-0.0279638383183888
cg16657924	CREM	CREM	-0.0261155087875669	0.573885630288723	-0.0261214483163022
cg03584380	ZDHHC6	ZDHHC6	0.106935108831913	0.0209526956194208	0.10734553366554
cg17872476	ZDHHC6	ZDHHC6	-0.110729616046006	0.0167905798250879	-0.11118552846151
cg18304674	ZDHHC6	ZDHHC6	0.0013242419963239	0.977255637170046	0.00132424277039577
cg12143431	ZDHHC6	ZDHHC6	-0.174915363529683	0.000147608244373153	-0.17673271110581
cg21242004	ZDHHC6	ZDHHC6	-0.199760546370948	1.39580087178864e-05	-0.202483135627845
cg03359430	ZDHHC6	ZDHHC6	-0.0146148769534893	0.753018817990966	-0.0146159176399341
cg23530981	POU6F1	POU6F1	0.0919433916693463	0.047293994239879	0.0922037975980208
cg23882234	POU6F1	POU6F1	-0.0761463805352934	0.100643067548787	-0.0762940671297631
cg15922693	POU6F1	POU6F1	-0.120110865358161	0.00945151971871694	-0.120693515071526
cg23814154	POU6F1	POU6F1	0.0223516229042646	0.630324985532197	0.0223553462737956
cg23379540	POU6F1	POU6F1	-0.05065428021131	0.27516751245316	-0.0506976708961632
cg04925196	POU6F1	POU6F1	0.0140656815828107	0.762014973134213	0.0140666092936863
cg22163059	POU6F1	POU6F1	-0.0524890313382953	0.258131296952293	-0.0525373153286916
cg20712883	POU6F1	POU6F1	0.0391989965676874	0.398534234327039	0.0392190923187477
cg27161523	POU6F1	POU6F1	-0.0163984556555451	0.724038197938295	-0.0163999257920914
cg19989018	POU6F1	POU6F1	0.157166862124766	0.000662034002192264	0.158480468245112
cg13217116	POU6F1	POU6F1	-0.0903382236626157	0.0513093817912873	-0.0905851839804449
cg13788479	CSPG4	CSPG4	-0.0786228121475541	0.0900185129646019	-0.0787854191982494
cg09628962	CSPG4	CSPG4	-0.108206934040391	0.0194674275284937	-0.108632248305763
cg11698750	CSPG4	CSPG4	-0.0965782530581786	0.0371499227907064	-0.0968802181350366
cg13230197	CSPG4	CSPG4	-0.114298479596035	0.0135554042870027	-0.114800155088801
cg21609684	CSPG4	CSPG4	-0.091358643903202	0.0487251498571836	-0.0916140963778816
cg05828925	BIN3	BIN3	-0.436054588295197	4.7389604626102e-23	-0.467348651981208
cg17250770	BIN3	BIN3	-0.463619331175847	3.28122950017243e-26	-0.50191176449777
cg07385743	BIN3	BIN3	0.0090339458976529	0.845787292652289	0.0090341916696895
cg06226386	BIN3	BIN3	-0.471077636003023	4.07879022245888e-27	-0.511454417877568
cg02929961	BIN3	BIN3	-0.314047906964992	3.99273443527208e-12	-0.325029933598029
cg12295617	BIN3	BIN3	0.0856228284552428	0.0647802823969074	0.085832995027568
cg01408251	BIN3	BIN3	0.00331488437261963	0.943106047872215	0.0033148965145227
cg07622815	BIN3	BIN3	0.0308742212670787	0.506145568288502	0.030884036831248
cg17571279	BIN3	BIN3	0.0251582330492977	0.588012258600031	0.0251635429221838
cg08970457	BIN3	BIN3	-0.0108760220243977	0.814862771899836	-0.0108764508886082
cg21156815	BIN3	BIN3	-0.135432590666805	0.00339788762168061	-0.136269858715959
cg16497626	PLP1	PLP1	-0.104695782945937	0.0238078405208274	-0.105080849326805
cg06253229	PLP1	PLP1	-0.0110791179794246	0.811469835132074	-0.0110795713217762
cg14725537	PLP1	PLP1	-0.31466670135174	3.60539065273569e-12	-0.325716583070578
cg08762253	PLP1	PLP1	-0.42717808666287	4.29779966453463e-22	-0.456439768096487
cg24974356	PLP1	PLP1	-0.346569227255319	1.34721404894833e-14	-0.361539364639348
cg18564727	PLP1	PLP1	0.0184536354177559	0.691129146480458	0.0184557305589802
cg03031520	PLP1	PLP1	-0.178106381254669	0.000110902304699773	-0.180026348852842
cg09484077	PLP1	PLP1	0.0231628217938733	0.617962128044236	0.0231669655384531
cg16135771	PLP1	PLP1	0.124741053744826	0.0070157631916944	0.12539416627075
cg19481052	PLP1	PLP1	-0.307950731650377	1.07763671517383e-11	-0.318279857126728
cg01005968	RTN2	RTN2	-0.127581647128489	0.00581577523504762	-0.128280705866299
cg25163851	RTN2	RTN2	-0.153470172053477	0.000888065347874448	-0.154692390444012
cg25820257	RTN2	RTN2	-0.134942468093704	0.00351670294431314	-0.135770612066046
cg09607282	RTN2	RTN2	-0.0907557201881702	0.050238562772652	-0.0910061317596572
cg19038042	RTN2	RTN2	0.189139172405795	3.97143502612204e-05	0.191444253170062
cg22709008	RTN2	RTN2	0.276266646396124	1.30957826285458e-09	0.283635692091258
cg19869610	RTN2	RTN2	-0.0834971848846117	0.0717405264834483	-0.0836920419681116
cg04845144	RTN2	RTN2	-0.0497080631629712	0.284245979439122	-0.049749065044516
cg02899346	RTN2	RTN2	-0.145799843402868	0.00160051704049119	-0.146846341785241
cg12950624	RTN2	RTN2	0.0389716662396348	0.401277367331103	0.0389914141742014
cg03591376	RTN2	RTN2	0.237903976068735	2.02918544896056e-07	0.242551161537035
cg14200826	RTN2	RTN2	0.0223323443933174	0.630620071713122	0.0223360581348987
cg19031575	RTN2	RTN2	-0.141550839689768	0.00219209203989583	-0.142507771609347
cg24804060	XYLT2	XYLT2	-0.163641391039849	0.000389669834256024	-0.165126009165043
cg21529788	XYLT2	XYLT2	0.0985735831220582	0.0333885482860953	0.0988947291730295
cg01060952	XYLT2	XYLT2	-0.0298196291425729	0.520787942441763	-0.0298284725014977
cg02987471	XYLT2	XYLT2	-0.0924194731267257	0.0461549742776098	-0.0926839591978715
cg20700813	XYLT2	XYLT2	-0.0870931553343841	0.0602985279054924	-0.0873143698346007
cg07050772	XYLT2	XYLT2	-0.0279226919877374	0.547662527137039	-0.0279299522754871
cg16097772	LYZ	LYZ	0.2036269673924	9.40591786702989e-06	0.206513520058057
cg11820931	DDX21	DDX21	-0.307058177988746	1.24384113488318e-11	-0.317294090252584
cg14340374	DDX21	DDX21	0.150400370127795	0.00112786897377911	0.151550046933488
cg17741291	DDX21	DDX21	0.066790718480931	0.149995041525494	0.0668903029650254
cg00270594	DDX21	DDX21	-0.000297688960060179	0.994886422733734	-0.000297688968853784
cg11963883	DDX21	DDX21	-0.0753492760421322	0.10426725276973	-0.075492362626395
cg08828868	DDX21	DDX21	0.0214351405424508	0.644417412569772	0.0214384243485118
cg02522627	DDX21	DDX21	0.20740211749599	6.3510907485056e-06	0.210455155477625
cg13607473	DDX21	DDX21	0.19149601405943	3.16439482668669e-05	0.193889671085544
cg05671732	DDX21	DDX21	-0.221496679082053	1.3741279066595e-06	-0.225229457458695
cg00070814	DDX21	DDX21	-0.0381914933769243	0.410777066748745	-0.0382100782231346
cg07163475	DDX21	DDX21	-0.0464302273580283	0.317243517550028	-0.0464636348152466
cg07221103	VAC14	VAC14	0.10614430099043	0.0219250410509648	0.106545646494163
cg05547993	VAC14	VAC14	-0.0689927593081677	0.136982733740397	-0.0691025415479642
cg06982530	VAC14	VAC14	-0.162668545439942	0.000422508750851122	-0.164126558558634
cg08842616	VAC14	VAC14	-0.0737729139935526	0.111738134216329	-0.0739071876890123
cg01381679	VAC14	VAC14	-0.109277046530872	0.01828960848391	-0.109715166214364
cg08382220	VAC14	VAC14	-0.170575738920041	0.000216040231567245	-0.17225959627905
cg08282578	VAC14	VAC14	-0.112299594530923	0.0152923391918196	-0.112775276613998
cg05408370	VAC14	VAC14	-0.12605206658624	0.006436818239379	-0.126726123405104
cg06134690	VAC14	VAC14	-0.191747275856248	3.08817685862785e-05	-0.194150510612671
cg07563611	VAC14	VAC14	0.0337836828414134	0.46689613231158	0.0337965445085525
cg27076536	VAC14	VAC14	0.055682567442709	0.230246511763573	0.0557402235703995
cg08796240	VAC14	VAC14	0.0200829963163828	0.665442307437515	0.0200856969731128
cg02604890	VAC14	VAC14	-0.0796930093705876	0.0857146920401641	-0.0798623646396985
cg07888926	VAC14	VAC14	-0.147587699587547	0.00139861353707952	-0.148673517610393
cg06542681	VAC14	VAC14	-0.0390949993633778	0.399787740640798	-0.039114935495319
cg08059678	VAC14	VAC14	0.0701142791636504	0.130698095397293	0.0702295134669497
cg01501252	USP9X	USP9X	0.235479466154024	2.7163275715195e-07	0.239982760615574
cg05196231	USP9X	USP9X	0.0199306843299217	0.667827561685223	0.0199333239954672
cg26039926	USP9X	USP9X	-0.215286006066432	2.73190195954547e-06	-0.21870770577805
cg18000985	USP9X	USP9X	-0.138243516233592	0.00278407914172183	-0.139134424309227
cg01302641	USP9X	USP9X	0.0141296717366016	0.760965097760575	0.0141306121677177
cg21606237	STX17	STX17	0.0674703169280471	0.145882616320531	0.0675729779179413
cg14233861	STX17	STX17	0.207233292234196	6.46461678147506e-06	0.210278748115651
cg14153061	STX17	STX17	-0.0840947763019058	0.0697246982603075	-0.0842938592239863
cg03950009	STX17	STX17	-0.181197990236977	8.36724478254154e-05	-0.183221070051496
cg22304376	STX17	STX17	0.0290144564250666	0.532111903062355	0.0290226023705876
cg18377183	SAP30	SAP30	1.02311807010457e-05	0.99982425183115	1.02311807014749e-05
cg16718094	SAP30	SAP30	0.0804396686705462	0.0828113363144323	0.080613841406442
cg18965055	SAP30	SAP30	0.00440863553407829	0.924382958124688	0.00440866409659034
cg15772393	SAP30	SAP30	0.0833137110059167	0.0723688946336971	0.0835072828176277
cg18380675	SAP30	SAP30	0.0644980800618166	0.164519629755638	0.06458774135096
cg03375579	SAP30	SAP30	-0.0523464339736776	0.259428627213311	-0.0523943250811514
cg14515211	SAP30	SAP30	0.00655459209368169	0.887778541855527	0.00655468596371018
cg03162396	SAP30	SAP30	-0.0998878568025399	0.0310925961309088	-0.10022207305669
cg21393018	SAP30	SAP30	-0.0198370867977515	0.669294991514127	-0.0198396894430381
cg06090383	SAP30	SAP30	-0.01064307728893	0.818758626895594	-0.010643479181439
cg16216227	SAP30	SAP30	-0.132343834323678	0.00421194861571184	-0.133124719760764
cg00392257	ISG20L2	ISG20L2	-0.331753748035538	1.95894663377759e-13	-0.344797606945566
cg19377421	ISG20L2	ISG20L2	-0.288721136453108	2.13008269808034e-10	-0.297170536240921
cg00341602	ISG20L2	ISG20L2	0.0241001822843341	0.603809862521239	0.0241048498572572
cg00992913	ISG20L2	ISG20L2	-0.0435927856903866	0.347752333025849	-0.0436204307916326
cg11949207	ISG20L2	ISG20L2	0.0595421211539035	0.19948358646532	0.0596126353930899
cg23881601	ISG20L2	ISG20L2	-0.107618356826875	0.0201429844472493	-0.108036736253595
cg05809481	ISG20L2	ISG20L2	-0.281498245932415	6.17420112317659e-10	-0.289308515117402
cg09507184	ISG20L2	ISG20L2	-0.325112550136129	6.21114633190217e-13	-0.337353371142247
cg27547283	ISG20L2	ISG20L2	-0.115892828772873	0.0122970232173499	-0.116415908527617
cg22032989	ISG20L2	ISG20L2	0.0573804268973551	0.216322809622942	0.0574435268734955
cg10805956	ISG20L2	ISG20L2	-0.118447374453322	0.0104951202887995	-0.119006014831162
cg15109730	ISG20L2	ISG20L2	0.0900215524101311	0.0521342421347667	0.0902659163088956
cg00533084	ISG20L2	ISG20L2	0.171735705746544	0.000195300995135293	0.173454569126438
cg03470736	ISG20L2	ISG20L2	0.0102030844969183	0.826129338903917	0.0102034385760431
cg07020338	ZFYVE19	ZFYVE19	-0.235547681751877	2.69424518205152e-07	-0.240054982096604
cg20055230	ZFYVE19	ZFYVE19	-0.115334239027724	0.0127256467292187	-0.115849751231553
cg25234324	ZFYVE19	ZFYVE19	-0.355914769325292	2.31029077334588e-15	-0.372200274464718
cg13045913	ZFYVE19	ZFYVE19	-0.0845385423546381	0.0682579474609547	-0.0847408027393683
cg16995983	NR2F1	NR2F1	-0.00765153552047156	0.869154337256571	-0.00765168484797269
cg08969950	NR2F1	NR2F1	0.246763083949368	6.80492614945946e-08	0.251963065476254
cg06259996	NR2F1	NR2F1	-0.0572958288822142	0.217001946156203	-0.0573586498113038
cg12207450	NR2F1	NR2F1	-0.159760339284875	0.000536677520883328	-0.161140748585422
cg26937148	NR2F1	NR2F1	-0.0676159917188826	0.145012403216354	-0.067719320334515
cg01778450	NR2F1	NR2F1	-0.0171524456785833	0.711901784936227	-0.0171541280953032
cg03086663	NR2F1	NR2F1	-0.143047114861724	0.00196412639921428	-0.144034971355825
cg26067259	NR2F1	NR2F1	0.141442987109425	0.00220942335792146	0.142397715555192
cg07777270	NR2F1	NR2F1	0.137736008713639	0.00288682275668115	0.138617065660981
cg11904056	NR2F1	NR2F1	-0.123746171262614	0.007485758515039	-0.124383685437594
cg17774851	NR2F1	NR2F1	0.0614245117756602	0.185615352518059	0.0615019380876825
cg08241477	NR2F1	NR2F1	0.0409963585302641	0.377244823316788	0.041019349264957
cg08690999	NR2F1	NR2F1	-0.0754155567366841	0.103962009934167	-0.0755590221140907
cg25449484	NR2F1	NR2F1	0.0519503083103571	0.263056113183502	0.0519971192300906
cg08806496	NR2F1	NR2F1	-0.120145259232581	0.00943095245299124	-0.120728412542679
cg03714110	NR2F1	NR2F1	0.0239566987119332	0.605966751852348	0.0239612833942218
cg07875786	NR2F1	NR2F1	-0.155419351265235	0.000761257033164146	-0.156689200631391
cg01536884	NR2F1	NR2F1	0.0590088068554557	0.203546518326485	0.05907744063183
cg26001207	NR2F1	NR2F1	-0.232141087507883	4.03788870785738e-07	-0.236451324019469
cg16663344	NR2F1	NR2F1	0.0404817121935718	0.383268112904586	0.0405038473542692
cg24695828	ZNF566	ZNF566	0.0322007418893481	0.488038845129478	0.0322118783370892
cg21076702	ZNF566	ZNF566	-0.143930643752411	0.00183991902976869	-0.144937073749064
cg09990582	MORF4L2	MORF4L2	-0.0471784516743776	0.309499153023489	-0.0472135018602778
cg14460470	MORF4L2	MORF4L2	-0.0593650032841014	0.20082631593071	-0.0594348892388529
cg15322420	MORF4L2	MORF4L2	-0.0803434682599262	0.0831808889767589	-0.0805170152270991
cg00382651	MORF4L2	MORF4L2	-0.049711921170017	0.284208558284049	-0.049752932608635
cg26309951	MORF4L2	MORF4L2	-0.0157226018411729	0.734976099239389	-0.0157238975768472
cg16950696	MORF4L2	MORF4L2	-0.111945357708204	0.0156197372078434	-0.112416529820079
cg18813010	MORF4L2	MORF4L2	-0.0629525762526013	0.174890704753962	-0.0630359354722522
cg23572319	MORF4L2	MORF4L2	-0.0338138954332972	0.466497581364413	-0.0338267916535109
cg11641061	MORF4L2	MORF4L2	-0.0573068230659861	0.216913600636417	-0.0573696802127587
cg08262933	MORF4L2	MORF4L2	-0.0653574993566329	0.158955941831583	-0.0654507990211399
cg09598844	MORF4L2	MORF4L2	-0.0526539452208571	0.25663653394657	-0.0527026862574185
cg05184076	MORF4L2	MORF4L2	-0.0733481595246486	0.113821537981163	-0.0734801222975579
cg17875227	MORF4L2	MORF4L2	-0.0732939000556387	0.114089860528336	-0.0734255695544379
cg02459389	ZZEF1	ZZEF1	-0.0183042882243176	0.693501988590765	-0.018306332900791
cg20289237	ZZEF1	ZZEF1	-0.310585928772653	7.0359721120133e-12	-0.321193762682091
cg02516155	ZZEF1	ZZEF1	0.245341331883483	8.1323495722229e-08	0.250449690832689
cg26591066	ZZEF1	ZZEF1	0.0518622376954375	0.263867331199518	0.0519088106888392
cg06753513	ZZEF1	ZZEF1	-0.0381299126675062	0.411532524856397	-0.03814840770667
cg19105961	ZZEF1	ZZEF1	-0.125595119387806	0.00663355250921878	-0.126261825632339
cg23709430	ZZEF1	ZZEF1	0.0675580312897192	0.145358163705677	0.0676610939268648
cg03105770	CCDC90B	CCDC90B	-0.0996013182003079	0.0315813051784169	-0.0999326550375225
cg02115904	CCDC90B	CCDC90B	0.0749104251826562	0.106306234425649	0.0750510206070952
cg19941758	CCDC90B	CCDC90B	-0.00524413444959092	0.910108216820126	-0.00524418252327047
cg19333374	CCDC90B	CCDC90B	-0.368878990673317	1.81409391060619e-16	-0.387124905418791
cg01826322	CCDC90B	CCDC90B	0.100193984828649	0.0305776385325021	0.100531295844438
cg01923103	CCDC90B	CCDC90B	0.169453407276316	0.000238053543676803	0.171103857934652
cg01697743	CCDC90B	CCDC90B	0.166610226798382	0.000303563936683731	0.168178066436267
cg20332930	CCDC90B	CCDC90B	0.176697253809436	0.000125903632932303	0.178571432886143
cg08799270	SYNJ1	SYNJ1	-0.148963518674258	0.00125948240613353	-0.150080265208089
cg11059343	SYNJ1	SYNJ1	0.147946121114338	0.00136106762060905	0.14903993999616
cg19784013	SYNJ1	SYNJ1	0.118037861509792	0.0107672079422865	0.118590695165722
cg21176629	SNHG6	SNHG6	-0.0891040887904437	0.0545866643763388	-0.089341033677283
cg11781847	SNHG6	SNHG6	0.0109330017831731	0.81391051133652	0.0109334374235754
cg15964163	SNHG6	SNHG6	-0.0163645380442783	0.724585799822241	-0.0163659990764705
[truncated: 103,855 more rows]
