# Supplementary material for: Epigenomic and genomic analysis of transcriptome modulation in skin cutaneous melanoma
Source: Aging (Albany NY). 2020 Jul 7;12(13):12703–25. doi: 10.18632/aging.103115 (PMC7377867; doi:10.18632/aging.103115)
Supplement: Supplementary Table 5 [file aging-12-103115-s001..xlsx]

## Sheet: S5_Table
Supplementary Table 5. CNV gain / loss and MetHyper / MetHypo correlation of included TCGA-SKCM samples.
Samples	Gain	Loss	MetHyper	MetHypo
TCGA-3N-A9WB-06	5727	1173	40498	113259
TCGA-3N-A9WC-06	4338	6960	30418	104475
TCGA-3N-A9WD-06	2840	7617	24946	106286
TCGA-BF-A1PU-01	4040	11459	33551	116844
TCGA-BF-A1PV-01	1806	490	44480	104366
TCGA-BF-A1PX-01	0	0	28315	105118
TCGA-BF-A1PZ-01	4707	182	26025	119924
TCGA-BF-A1Q0-01	3312	8068	27749	100001
TCGA-BF-A3DJ-01	1450	4943	28886	114648
TCGA-BF-A3DL-01	1508	3608	30908	112969
TCGA-BF-A3DM-01	2875	4092	30400	124793
TCGA-BF-A3DN-01	6500	2911	29590	114009
TCGA-BF-A5EO-01	3770	4093	23105	114260
TCGA-BF-A5EP-01	12130	10603	27398	114592
TCGA-BF-A5EQ-01	757	1709	36067	99284
TCGA-BF-A5ER-01	1725	3467	39919	98900
TCGA-BF-A5ES-01	6	365	37419	102086
TCGA-BF-A9VF-01	5254	9824	40368	116673
TCGA-BF-AAOU-01	770	9408	31277	103906
TCGA-BF-AAOX-01	4372	2156	19720	116016
TCGA-BF-AAP0-06	176	1	27434	109117
TCGA-BF-AAP1-01	7314	6072	39636	112806
TCGA-BF-AAP2-01	586	3496	25649	120852
TCGA-BF-AAP4-01	3030	5491	22640	108658
TCGA-BF-AAP6-01	9812	3323	27293	125708
TCGA-BF-AAP7-01	74	3179	25096	110401
TCGA-BF-AAP8-01	5241	913	31859	113699
TCGA-D3-A1Q1-06	14458	13003	38297	114220
TCGA-D3-A1Q3-06	3173	467	41386	90819
TCGA-D3-A1Q4-06	1034	9263	27319	109042
TCGA-D3-A1Q5-06	6550	9491	32116	119526
TCGA-D3-A1Q6-06	10	3832	28264	113099
TCGA-D3-A1Q7-06	2268	6	32103	98470
TCGA-D3-A1Q8-06	2832	7880	27420	111009
TCGA-D3-A1QA-06	3117	479	33503	114621
TCGA-D3-A1QB-06	2856	2846	32992	106202
TCGA-D3-A2J6-06	2169	11690	29204	112023
TCGA-D3-A2J7-06	1703	4	28072	104809
TCGA-D3-A2J8-06	0	0	28442	109998
TCGA-D3-A2J9-06	1072	2	23597	110435
TCGA-D3-A2JA-06	3076	1463	27835	114282
TCGA-D3-A2JB-06	436	0	27771	108355
TCGA-D3-A2JC-06	1808	1766	29063	108979
TCGA-D3-A2JD-06	6300	62	24137	110345
TCGA-D3-A2JE-06	7683	290	27578	108303
TCGA-D3-A2JF-06	2243	3546	25962	111837
TCGA-D3-A2JG-06	698	4527	25838	109025
TCGA-D3-A2JH-06	0	0	24103	110213
TCGA-D3-A2JK-06	84	2933	28377	113848
TCGA-D3-A2JL-06	3043	7644	29737	99963
TCGA-D3-A2JN-06	0	4	23767	106571
TCGA-D3-A2JO-06	711	4011	21054	96049
TCGA-D3-A2JP-06	26	6484	23974	116540
TCGA-D3-A3BZ-06	562	0	28510	109135
TCGA-D3-A3C1-06	997	6336	31867	105951
TCGA-D3-A3C3-06	3767	3392	20079	108693
TCGA-D3-A3C6-06	13733	12327	24866	122165
TCGA-D3-A3C7-06	1182	6780	30514	110489
TCGA-D3-A3C8-06	0	0	34139	95724
TCGA-D3-A3CB-06	0	2	31974	94235
TCGA-D3-A3CC-06	2307	5676	31552	102955
TCGA-D3-A3CE-06	4216	7166	27823	109912
TCGA-D3-A3CF-06	837	3605	25802	107583
TCGA-D3-A3ML-06	7613	1790	55224	103419
TCGA-D3-A3MO-06	5870	3511	30574	117063
TCGA-D3-A3MR-06	17	2	21018	112391
TCGA-D3-A3MU-06	5879	4176	32912	103940
TCGA-D3-A3MV-06	1096	0	22133	117265
TCGA-D3-A51E-06	2120	2405	20785	119635
TCGA-D3-A51F-06	0	1	30235	114311
TCGA-D3-A51G-06	8576	1136	16911	125158
TCGA-D3-A51H-06	85	0	33002	115439
TCGA-D3-A51J-06	1852	6698	22697	107370
TCGA-D3-A51K-06	7143	5456	27158	115409
TCGA-D3-A51N-06	1133	3325	18023	115639
TCGA-D3-A51R-06	5065	739	21179	131030
TCGA-D3-A51T-06	3694	8537	20279	116174
TCGA-D3-A5GL-06	745	70	27227	111688
TCGA-D3-A5GN-06	5711	5491	20000	110133
TCGA-D3-A5GO-06	9255	4648	21315	120009
TCGA-D3-A5GR-06	1843	2758	24064	102721
TCGA-D3-A5GS-06	2522	8736	24858	117054
TCGA-D3-A5GT-01	5571	5926	46295	102227
TCGA-D3-A5GU-06	3933	8298	40818	99076
TCGA-D3-A8GB-06	896	1	30298	113872
TCGA-D3-A8GC-06	3004	12634	43408	98817
TCGA-D3-A8GD-06	1358	742	31211	103944
TCGA-D3-A8GE-06	0	75	30285	114846
TCGA-D3-A8GI-06	3049	5815	34226	111938
TCGA-D3-A8GJ-06	0	3610	30543	102985
TCGA-D3-A8GK-06	5459	1123	36045	116484
TCGA-D3-A8GL-06	8546	2158	52527	98861
TCGA-D3-A8GM-06	3729	4041	26470	108491
TCGA-D3-A8GN-06	6	40	20047	104571
TCGA-D3-A8GO-06	1851	6421	22195	111793
TCGA-D3-A8GP-06	7510	6916	40347	108293
TCGA-D3-A8GQ-06	1900	701	23502	108947
TCGA-D3-A8GR-06	4752	7483	39224	102446
TCGA-D3-A8GS-06	609	2450	22391	109985
TCGA-D3-A8GV-06	5433	5240	35071	120430
TCGA-D9-A148-06	6350	6231	12885	124001
TCGA-D9-A149-06	2307	3311	37290	105256
TCGA-D9-A1JW-06	3330	849	32719	104704
TCGA-D9-A1JX-06	4909	5228	27632	112283
TCGA-D9-A1X3-06	486	1402	43006	108930
TCGA-D9-A3Z1-06	0	3	24824	105023
TCGA-D9-A3Z3-06	3658	13798	24306	109948
TCGA-D9-A3Z4-01	5405	7194	36813	109945
TCGA-D9-A4Z2-01	2402	5660	25951	120541
TCGA-D9-A4Z3-01	5898	1766	24129	110968
TCGA-D9-A4Z5-01	5311	6804	35010	116529
TCGA-D9-A4Z6-06	627	8277	27342	117525
TCGA-D9-A6E9-06	872	469	28892	104847
TCGA-D9-A6EA-06	8824	13584	38836	106790
TCGA-D9-A6EC-06	9142	8767	36684	117187
TCGA-D9-A6EG-06	4446	5355	42179	110417
TCGA-DA-A1HV-06	3554	213	22801	110960
TCGA-DA-A1HW-06	723	11311	24774	111347
TCGA-DA-A1HY-06	2283	2794	18670	119353
TCGA-DA-A1I0-06	597	638	23361	111634
TCGA-DA-A1I1-06	6587	14633	21620	108024
TCGA-DA-A1I2-06	4176	15725	34513	114415
TCGA-DA-A1I4-06	2922	6355	29870	113185
TCGA-DA-A1I5-06	3077	4811	21999	113202
TCGA-DA-A1I7-06	6426	8439	29833	109439
TCGA-DA-A1I8-06	4165	7915	25252	116227
TCGA-DA-A1IA-06	6441	6783	47936	102325
TCGA-DA-A1IB-06	17	5	32695	98317
TCGA-DA-A1IC-06	4294	2401	33208	106178
TCGA-DA-A3F2-06	0	0	28242	115241
TCGA-DA-A3F3-06	8000	1720	28534	127008
TCGA-DA-A3F5-06	1130	5527	29431	100027
TCGA-DA-A3F8-06	0	0	24444	110378
TCGA-DA-A95V-06	9147	8190	23756	112924
TCGA-DA-A95W-06	2397	3084	44599	100634
TCGA-DA-A95X-06	1224	9774	27657	114243
TCGA-DA-A95Y-06	5038	2708	27367	121400
TCGA-DA-A95Z-06	2970	4821	47249	94408
TCGA-DA-A960-01	0	4126	29970	118397
TCGA-EB-A1NK-01	218	3753	24254	115714
TCGA-EB-A24C-01	2396	11420	40529	111462
TCGA-EB-A24D-01	6733	13107	43101	99406
TCGA-EB-A299-01	2500	1808	26309	116029
TCGA-EB-A3HV-01	1161	6226	31885	108221
TCGA-EB-A3XB-01	0	8885	22178	108974
TCGA-EB-A3XC-01	3505	6020	23416	114419
TCGA-EB-A3XD-01	8	2	23999	104558
TCGA-EB-A3XE-01	2283	6272	33835	102923
TCGA-EB-A3XF-01	3216	3954	26321	114208
TCGA-EB-A3Y6-01	2156	6026	24102	110719
TCGA-EB-A3Y7-01	2947	7062	29637	108608
TCGA-EB-A41A-01	7078	2610	46485	105863
TCGA-EB-A41B-01	5126	6247	32897	114517
TCGA-EB-A42Y-01	1660	1678	29829	117859
TCGA-EB-A42Z-01	625	9103	37061	113457
TCGA-EB-A430-01	3468	4934	19850	118412
TCGA-EB-A431-01	4884	4956	23739	118576
TCGA-EB-A44N-01	351	4	23135	109643
TCGA-EB-A44O-01	2553	9220	29612	114065
TCGA-EB-A44P-01	1	2706	31663	113711
TCGA-EB-A44Q-06	2327	2655	28217	104782
TCGA-EB-A44R-06	3476	7726	31938	111788
TCGA-EB-A4IQ-01	2214	6627	29712	103891
TCGA-EB-A4IS-01	2856	2709	24048	113887
TCGA-EB-A4OY-01	7274	8436	35611	110095
TCGA-EB-A4OZ-01	0	1	22989	111176
TCGA-EB-A4P0-01	3975	5122	25664	121054
TCGA-EB-A4XL-01	149	1996	25576	117077
TCGA-EB-A51B-01	2615	2022	33847	113256
TCGA-EB-A550-01	765	4128	25141	108661
TCGA-EB-A551-01	2619	7277	23740	99792
TCGA-EB-A553-01	3481	1329	33510	98790
TCGA-EB-A57M-01	3109	1961	23037	114692
TCGA-EB-A5FP-01	6227	3307	28016	117597
TCGA-EB-A5KH-06	1778	2807	31258	116365
TCGA-EB-A5SE-01	3382	2818	40034	110638
TCGA-EB-A5SF-01	131	11397	28885	113772
TCGA-EB-A5SG-06	943	0	21134	106734
TCGA-EB-A5SH-06	3027	11699	42578	91639
TCGA-EB-A5UL-06	4464	2248	21652	111574
TCGA-EB-A5UM-01	2208	3634	36487	98990
TCGA-EB-A5UN-06	106	212	29833	108341
TCGA-EB-A5VU-01	3369	9439	23168	118703
TCGA-EB-A5VV-06	0	0	32706	109098
TCGA-EB-A6L9-06	354	3	26233	108574
TCGA-EB-A6QY-01	2011	1846	16708	116576
TCGA-EB-A6QZ-01	292	4179	30904	114952
TCGA-EB-A6R0-01	4707	8683	23942	114590
TCGA-EB-A82B-01	3589	5913	31923	105894
TCGA-EB-A82C-01	12585	10244	36349	111154
TCGA-EB-A85I-01	1423	6239	29848	108444
TCGA-EB-A85J-01	2854	4138	32725	101867
TCGA-EB-A97M-01	2854	2721	39467	105704
TCGA-EE-A17X-06	0	0	30155	120933
TCGA-EE-A17Y-06	2845	2601	22191	118197
TCGA-EE-A17Z-06	3569	4644	29988	118960
TCGA-EE-A180-06	6586	1691	44851	106092
TCGA-EE-A181-06	416	5505	21207	111166
TCGA-EE-A182-06	1465	5047	31114	102713
TCGA-EE-A183-06	2214	584	31460	104049
TCGA-EE-A184-06	6719	3309	34232	108888
TCGA-EE-A185-06	2155	4606	33991	119380
TCGA-EE-A20B-06	5225	7407	26811	112330
TCGA-EE-A20C-06	16	1727	34782	119336
TCGA-EE-A20F-06	2491	7480	22063	115848
TCGA-EE-A20H-06	16864	7574	22227	116783
TCGA-EE-A20I-06	5024	12976	21281	117521
TCGA-EE-A29A-06	5129	2828	43663	103980
TCGA-EE-A29B-06	5265	1447	59796	102491
TCGA-EE-A29C-06	792	8083	27464	112586
TCGA-EE-A29D-06	8598	6846	36651	113279
TCGA-EE-A29E-06	5607	2291	32037	122742
TCGA-EE-A29G-06	117	0	23101	100698
TCGA-EE-A29H-06	22	7143	19986	111438
TCGA-EE-A29L-06	12428	8760	35879	111407
TCGA-EE-A29M-06	5120	10278	19962	113814
TCGA-EE-A29N-06	905	54	27315	100515
TCGA-EE-A29P-06	2896	6013	31951	90379
TCGA-EE-A29Q-06	0	9710	24915	117980
TCGA-EE-A29R-06	5055	6935	28098	116339
TCGA-EE-A29S-06	2861	4755	26853	97457
TCGA-EE-A29T-06	1189	5382	32617	93505
TCGA-EE-A29V-06	2949	6134	28641	116689
TCGA-EE-A29W-06	282	1194	36487	113827
TCGA-EE-A29X-06	4966	13068	30618	105077
TCGA-EE-A2A0-06	0	2	24551	88847
TCGA-EE-A2A1-06	5239	448	26424	114081
TCGA-EE-A2A2-06	2901	1805	22859	117533
TCGA-EE-A2A5-06	6522	13552	31392	110034
TCGA-EE-A2A6-06	5742	4718	34443	107760
TCGA-EE-A2GB-06	6338	4953	20780	126511
TCGA-EE-A2GC-06	6	4185	32778	106976
TCGA-EE-A2GD-06	8	0	30192	81994
TCGA-EE-A2GE-06	0	0	22734	110839
TCGA-EE-A2GH-06	1	71	20872	111244
TCGA-EE-A2GI-06	2675	4691	19784	114527
TCGA-EE-A2GJ-06	3396	6928	33627	94393
TCGA-EE-A2GK-06	0	78	35568	109360
TCGA-EE-A2GL-06	304	15	35452	92317
TCGA-EE-A2GM-06	7709	6887	28547	111130
TCGA-EE-A2GN-06	5122	2830	30231	113092
TCGA-EE-A2GO-06	7716	6325	35587	114751
TCGA-EE-A2GP-06	5244	9832	26970	111657
TCGA-EE-A2GR-06	1308	1342	41065	115602
TCGA-EE-A2GS-06	3643	2727	31701	118428
TCGA-EE-A2GT-06	0	126	25999	107270
TCGA-EE-A2GU-06	6237	6590	36545	98824
TCGA-EE-A2M5-06	1214	555	22410	113203
TCGA-EE-A2M6-06	5470	6390	29240	117077
TCGA-EE-A2M7-06	2642	4431	28916	108562
TCGA-EE-A2M8-06	0	0	28206	107301
TCGA-EE-A2MC-06	0	113	21026	115635
TCGA-EE-A2MD-06	4312	8779	25492	110492
TCGA-EE-A2ME-06	187	3	35386	103535
TCGA-EE-A2MF-06	1394	1754	37141	107804
TCGA-EE-A2MG-06	19	24	31283	112041
TCGA-EE-A2MH-06	505	171	30201	106638
TCGA-EE-A2MI-06	1790	2740	23831	112596
TCGA-EE-A2MJ-06	8	25	28785	106290
TCGA-EE-A2MK-06	5	145	29817	113995
TCGA-EE-A2ML-06	1231	1077	22027	104075
TCGA-EE-A2MM-06	4717	4366	45159	103741
TCGA-EE-A2MN-06	5040	7491	31945	97595
TCGA-EE-A2MP-06	4116	2154	22018	110049
TCGA-EE-A2MQ-06	6964	4832	32360	105121
TCGA-EE-A2MR-06	155	0	33354	100327
TCGA-EE-A2MS-06	8447	9895	45787	104294
TCGA-EE-A2MT-06	4467	1795	35024	116966
TCGA-EE-A2MU-06	780	493	24940	105145
TCGA-EE-A3AA-06	44	12	31862	105763
TCGA-EE-A3AB-06	2901	4060	19199	111893
TCGA-EE-A3AC-06	5307	528	37806	106508
TCGA-EE-A3AD-06	3978	9199	25899	122395
TCGA-EE-A3AF-06	3028	6156	29455	108080
TCGA-EE-A3AG-06	4491	3997	22004	129588
TCGA-EE-A3AH-06	1894	10152	34838	122966
TCGA-EE-A3J3-06	5281	3056	30820	110434
TCGA-EE-A3J4-06	62	3237	53048	88761
TCGA-EE-A3J5-06	2662	3933	19560	115475
TCGA-EE-A3J7-06	5885	3754	37868	92011
TCGA-EE-A3J8-06	4	3117	28350	125071
TCGA-EE-A3JA-06	1228	521	26012	116387
TCGA-EE-A3JB-06	4141	1512	23630	111949
TCGA-EE-A3JD-06	6	2	32221	109674
TCGA-EE-A3JE-06	0	0	27718	108360
TCGA-EE-A3JH-06	38	3	25459	106131
TCGA-EE-A3JI-06	1760	6950	47877	87830
TCGA-ER-A193-06	2084	7003	30973	103800
TCGA-ER-A194-01	2781	2249	29869	108823
TCGA-ER-A195-06	8	1483	32585	109220
TCGA-ER-A196-01	973	3	28553	108341
TCGA-ER-A197-06	2833	3985	33041	106078
TCGA-ER-A198-06	233	794	37633	103690
TCGA-ER-A199-06	18	7	32960	101727
TCGA-ER-A19A-06	0	0	28823	110069
TCGA-ER-A19B-06	9812	6970	28171	122404
TCGA-ER-A19C-06	3015	12506	27996	114575
TCGA-ER-A19D-06	6115	9987	28919	112097
TCGA-ER-A19E-06	7671	10881	26545	111388
TCGA-ER-A19F-06	3443	1112	22891	125984
TCGA-ER-A19G-06	5547	2483	24348	107881
TCGA-ER-A19H-06	6615	10609	22870	118375
TCGA-ER-A19J-06	2794	287	33856	110066
TCGA-ER-A19K-01	906	932	26894	104475
TCGA-ER-A19L-06	6961	10610	45987	105901
TCGA-ER-A19M-06	4682	2343	26111	110015
TCGA-ER-A19N-06	857	607	25494	110177
TCGA-ER-A19O-06	0	1459	31274	107340
TCGA-ER-A19P-06	0	2	31434	105140
TCGA-ER-A19Q-06	6137	3344	20839	115999
TCGA-ER-A19S-06	0	18	29056	97074
TCGA-ER-A19T-01	10746	9771	39643	117702
TCGA-ER-A19W-06	2796	4	27607	97569
TCGA-ER-A1A1-06	19	0	30188	111918
TCGA-ER-A2NB-01	2299	1864	31674	96645
TCGA-ER-A2NC-06	1864	1879	27239	110559
TCGA-ER-A2ND-06	4511	10163	35237	106551
TCGA-ER-A2NE-06	5502	9965	38519	115584
TCGA-ER-A2NF-01	2761	562	33209	111230
TCGA-ER-A2NG-06	3107	6290	29654	102332
TCGA-ER-A2NH-06	2175	371	25582	109393
TCGA-ER-A3ES-06	3341	2063	45730	116632
TCGA-ER-A3ET-06	2080	3908	28232	100236
TCGA-ER-A3EV-06	3633	5699	26960	110396
TCGA-ER-A3PL-06	7392	2494	42363	104323
TCGA-ER-A42H-01	2978	7721	59701	99923
TCGA-ER-A42K-06	7939	4829	32977	115487
TCGA-ER-A42L-06	0	4	28792	106038
TCGA-FR-A2OS-01	19	3076	31197	111719
TCGA-FR-A3R1-01	1320	1393	32970	101658
TCGA-FR-A3YN-06	8470	9329	30058	116090
TCGA-FR-A3YO-06	1863	4634	30474	98772
TCGA-FR-A44A-06	2063	66	24374	107696
TCGA-FR-A69P-06	13780	10351	24573	118137
TCGA-FR-A726-01	3797	4164	20007	112921
TCGA-FR-A728-01	134	49	23153	101897
TCGA-FR-A729-06	10445	5975	27475	110521
TCGA-FR-A7U8-06	2661	4636	31727	110576
TCGA-FR-A7U9-06	1	937	25617	110903
TCGA-FR-A7UA-06	0	0	27946	108692
TCGA-FR-A8YC-06	4510	3530	36809	104237
TCGA-FR-A8YD-06	4494	815	38353	97918
TCGA-FR-A8YE-06	0	1	30254	111474
TCGA-FS-A1YW-06	3594	6606	32820	113834
TCGA-FS-A1YX-06	5975	10111	28537	109299
TCGA-FS-A1YY-06	622	7841	28606	107573
TCGA-FS-A1Z0-06	5254	1025	29441	110246
TCGA-FS-A1Z3-06	8124	3435	34930	114795
TCGA-FS-A1Z4-06	31	1	29358	107835
TCGA-FS-A1Z7-06	5241	6955	27511	109198
TCGA-FS-A1ZA-06	5032	4493	21796	109762
TCGA-FS-A1ZB-06	2288	1971	25793	113951
TCGA-FS-A1ZC-06	8853	4411	28672	121669
TCGA-FS-A1ZD-06	1477	2984	37541	113835
TCGA-FS-A1ZE-06	4970	4782	41768	114941
TCGA-FS-A1ZF-06	3741	6689	27111	123171
TCGA-FS-A1ZG-06	2159	2976	47404	108410
TCGA-FS-A1ZH-06	1096	5283	21826	113149
TCGA-FS-A1ZJ-06	6626	11250	39826	104772
TCGA-FS-A1ZK-06	5733	20535	34317	116688
TCGA-FS-A1ZM-06	5052	4619	33126	107937
TCGA-FS-A1ZN-01	2857	3888	34657	117876
TCGA-FS-A1ZP-06	4363	1221	36239	108779
TCGA-FS-A1ZQ-06	3942	10114	25897	114542
TCGA-FS-A1ZR-06	0	5352	34597	111705
TCGA-FS-A1ZS-06	2750	874	36360	107673
TCGA-FS-A1ZT-06	5009	2207	25264	116717
TCGA-FS-A1ZU-06	8971	7385	42375	105259
TCGA-FS-A1ZW-06	13	1380	19889	113069
TCGA-FS-A1ZY-06	11986	6307	39832	117797
TCGA-FS-A1ZZ-06	2865	1414	35054	114949
TCGA-FS-A4F0-06	1133	1459	47148	101097
TCGA-FS-A4F2-06	4105	9159	21651	117559
TCGA-FS-A4F4-06	1495	6373	23470	115240
TCGA-FS-A4F5-06	7020	10333	32442	111680
TCGA-FS-A4F8-06	0	2	28239	107101
TCGA-FS-A4F9-06	8	6704	53146	97797
TCGA-FS-A4FB-06	73	3925	24375	128203
TCGA-FS-A4FC-06	1822	623	28465	95180
TCGA-FS-A4FD-06	10133	2704	27451	121007
TCGA-FW-A3I3-06	5119	8709	25941	119615
TCGA-FW-A3R5-06	821	1570	35547	100926
TCGA-FW-A3TU-06	2440	8725	42961	99659
TCGA-FW-A3TV-06	0	7296	24605	112643
TCGA-FW-A5DX-01	11375	9878	19999	125360
TCGA-FW-A5DY-06	4	2	31013	98243
TCGA-GF-A2C7-01	3998	8853	47369	101259
TCGA-GF-A3OT-06	0	7	25064	109851
TCGA-GF-A4EO-06	405	5	24138	104003
TCGA-GF-A6C8-06	271	3232	20379	113466
TCGA-GF-A6C9-06	144	1	23852	109746
TCGA-GF-A769-01	12566	56	27953	118149
TCGA-GN-A262-06	5245	7223	35912	119292
TCGA-GN-A263-01	0	2	21892	115491
TCGA-GN-A264-06	4337	10312	36892	108877
TCGA-GN-A265-06	1062	48	24121	108046
TCGA-GN-A266-06	3734	5011	23331	110347
TCGA-GN-A267-06	5932	11027	38655	103906
TCGA-GN-A268-06	8573	7057	49427	98327
TCGA-GN-A26A-06	1769	9308	24303	111866
TCGA-GN-A26C-01	5808	2396	33082	103600
TCGA-GN-A26D-06	8307	13611	36950	111502
TCGA-GN-A4U3-06	6562	7746	27301	123493
TCGA-GN-A4U4-06	3316	1	28096	110811
TCGA-GN-A4U5-01	2369	3993	22920	110449
TCGA-GN-A4U7-06	5770	4225	26277	121182
TCGA-GN-A4U8-06	2855	1730	21555	111709
TCGA-GN-A4U9-06	4964	9718	30778	109593
TCGA-GN-A8LK-06	5373	8088	33308	114613
TCGA-GN-A8LL-06	6741	9589	26671	128300
TCGA-GN-A8LN-01	2970	4748	30880	118284
TCGA-GN-A9SD-06	3284	1	24902	110388
TCGA-HR-A2OG-06	336	2857	20187	112386
TCGA-HR-A2OH-06	13	1856	31443	104558
TCGA-HR-A5NC-01	348	10179	30778	108107
TCGA-IH-A3EA-01	2488	1137	35153	104062
TCGA-LH-A9QB-06	3649	8071	47103	113026
TCGA-OD-A75X-06	3329	4715	29844	107152
TCGA-QB-A6FS-06	3893	2578	26996	112879
TCGA-QB-AA9O-06	2707	3095	18087	118707
TCGA-RP-A690-06	506	802	40409	115528
TCGA-RP-A693-06	35	3501	29869	98346
TCGA-RP-A694-06	4806	4692	24686	109742
TCGA-RP-A695-06	5234	2362	27418	105747
TCGA-RP-A6K9-06	0	5626	28027	104234
TCGA-W3-A824-06	2728	116	45426	95488
TCGA-W3-A825-06	10879	9132	26018	112455
TCGA-W3-A828-06	2178	981	21327	116009
TCGA-W3-AA1O-06	3518	1433	33203	103561
TCGA-W3-AA1Q-06	4045	2	32338	96635
TCGA-W3-AA1R-06	4839	5049	17097	116858
TCGA-W3-AA1V-06	2133	4094	29232	105641
TCGA-W3-AA1W-06	6	777	37741	92001
TCGA-W3-AA21-06	6373	8033	30196	114848
TCGA-WE-A8JZ-06	7982	12952	24970	121611
TCGA-WE-A8K1-06	395	4034	22770	109101
TCGA-WE-A8K4-01	3919	5615	28745	110982
TCGA-WE-A8K5-06	1432	4604	34002	107485
TCGA-WE-A8K6-06	1128	3875	32131	122498
TCGA-WE-A8ZM-06	3863	6346	39022	115745
TCGA-WE-A8ZN-06	866	1156	24283	113601
TCGA-WE-A8ZO-06	2835	3737	35071	102366
TCGA-WE-A8ZQ-06	6896	10084	43088	111833
TCGA-WE-A8ZR-06	4765	11196	37885	107028
TCGA-WE-A8ZT-06	12	1727	26702	119822
TCGA-WE-A8ZX-06	3332	9536	23176	115977
TCGA-WE-A8ZY-06	11780	16647	33362	114282
TCGA-WE-AA9Y-06	602	5	28444	107543
TCGA-WE-AAA0-06	3030	2203	25746	115462
TCGA-WE-AAA3-06	2941	10965	27380	104585
TCGA-WE-AAA4-06	769	35	25840	107772
TCGA-XV-A9VZ-01	0	0	29103	117511
TCGA-XV-A9W2-01	2238	6487	24588	107939
TCGA-XV-A9W5-01	2327	3157	27078	114981
TCGA-XV-AAZV-01	23	2	23999	111708
TCGA-XV-AAZW-01	24	5875	32510	114865
TCGA-XV-AAZY-01	305	908	16482	109202
TCGA-YD-A89C-06	10795	1472	21966	115221
TCGA-YD-A9TA-06	7456	9025	19499	117427
TCGA-YD-A9TB-06	6335	3088	26116	110117
TCGA-YG-AA3N-01	971	1222	29619	107558
TCGA-YG-AA3O-06	5108	6550	34318	107152
TCGA-YG-AA3P-06	1793	6911	48540	106303
TCGA-Z2-A8RT-06	1687	7059	30737	114159
TCGA-Z2-AA3S-06	369	5336	37673	106515
TCGA-Z2-AA3V-06	922	6338	24369	110969
