# Supplementary material for: Epigenomic and genomic analysis of transcriptome modulation in skin cutaneous melanoma
Source: Aging (Albany NY). 2020 Jul 7;12(13):12703–25. doi: 10.18632/aging.103115 (PMC7377867; doi:10.18632/aging.103115)
Supplement: Supplementary Table 6 [file aging-12-103115-s006..xlsx]

## Sheet: S6_Table
Supplementary Table 6. Six immune cell scores of included TCGA-SKCM samples.
barcode	B_cell	CD4_Tcell	CD8_Tcell	Neutrophil	Macrophage	Dendritic	CNVCor_C	METCor_C	iCluster
TCGA-3N-A9WB-06	0.0477845	0.0816314	0.0169807	0.0429104	0	0.291503	CNVCorC1	METCorC2	iC2
TCGA-3N-A9WC-06	0.149319	0.241161	0.246159	0.215037	0.00448865	0.748477	CNVCorC2	METCorC1	iC1
TCGA-3N-A9WD-06	0.0839309	0.120463	0.0959017	0.0815866	0.003382	0.337171	CNVCorC2	METCorC3	iC4
TCGA-BF-A1PU-01	0.0509738	0.0913361	0.0223913	0.0426135	0	0.252345	CNVCorC1	METCorC2	iC3
TCGA-BF-A1PV-01	0.0431721	0.0885026	0.0632483	0.0478613	0	0.283331	CNVCorC2	METCorC3	iC2
TCGA-BF-A1PX-01	0.061973	0.11317	0.446813	0.115723	0.114169	0.601939	CNVCorC1	METCorC1	iC1
TCGA-BF-A1PZ-01	0.0326374	0.0947436	0.071216	0.063191	0	0.313136	CNVCorC1	METCorC2	iC3
TCGA-BF-A1Q0-01	0.0647937	0.0812318	0.106155	0.0805808	0.0182762	0.481049	CNVCorC2	METCorC3	iC2
TCGA-BF-A3DJ-01	0.127939	0.0908751	0.147483	0.121037	0.141056	0.506709	CNVCorC2	METCorC3	iC4
TCGA-BF-A3DL-01	0.0425141	0.0821266	0	0.0411134	0	0.333071	CNVCorC1	METCorC2	iC3
TCGA-BF-A3DM-01	0.0813198	0.12896	0.0414978	0.0939124	0.00658123	0.332024	CNVCorC2	METCorC3	iC4
TCGA-BF-A3DN-01	0.0745713	0.0912484	0.0839895	0.0651988	0.00220871	0.331267	CNVCorC2	METCorC3	iC4
TCGA-BF-A5EO-01	0.057347	0.121669	0.0758797	0.0606855	0	0.453613	CNVCorC1	METCorC2	iC3
TCGA-BF-A5EP-01	0.0519858	0.0747007	0.0400222	0.0445711	0	0.320475	CNVCorC2	METCorC3	iC3
TCGA-BF-A5EQ-01	0.078629	0.127105	0.131364	0.0848765	0.084808	0.407053	CNVCorC1	METCorC3	iC2
TCGA-BF-A5ER-01	0.0471285	0.0567896	0.0440874	0.0261732	0	0.250567	CNVCorC1	METCorC2	iC2
TCGA-BF-A5ES-01	0.0740685	0.0939614	0.0563604	0.0599434	0.000612423	0.43307	CNVCorC1	METCorC2	iC3
TCGA-BF-A9VF-01	0.0743791	0.0443611	0.0747573	0.0298686	0	0.292828	CNVCorC1	METCorC2	iC3
TCGA-BF-AAOU-01	0.0812325	0.090384	0.0671042	0.0824881	0.0044487	0.356639	CNVCorC2	METCorC3	iC4
TCGA-BF-AAOX-01	0.0712886	0.0714827	0.0497918	0.0322434	0	0.295356	CNVCorC1	METCorC2	iC3
TCGA-BF-AAP0-06	0.270868	0.301121	0.32228	0.137983	0.0156169	0.850556	CNVCorC2	METCorC1	iC1
TCGA-BF-AAP1-01	0.0274795	0.0840213	0.038003	0.0567036	0	0.292796	CNVCorC2	METCorC3	iC2
TCGA-BF-AAP2-01	0.041636	0.117923	0.0950964	0.0693122	0.0209856	0.345176	CNVCorC1	METCorC3	iC3
TCGA-BF-AAP4-01	0.0528435	0.0896758	0.383697	0.124354	0.155808	0.399572	CNVCorC1	METCorC2	iC3
TCGA-BF-AAP6-01	0.0787545	0.112968	0.0693085	0.0557244	0.00844715	0.430518	CNVCorC1	METCorC2	iC3
TCGA-BF-AAP7-01	0.0638243	0.131915	0.234566	0.088474	0.0628393	0.603784	CNVCorC1	METCorC1	iC1
TCGA-BF-AAP8-01	0.0231112	0.140665	0	0.052416	0.0316232	0.297716	CNVCorC1	METCorC3	iC2
TCGA-D3-A1Q1-06	0.0426287	0.042255	0.0345951	0.0485888	0	0.285374	CNVCorC2	METCorC2	iC4
TCGA-D3-A1Q3-06	0.134336	0.203892	0.23848	0.122293	0.0716351	0.506882	CNVCorC1	METCorC2	iC2
TCGA-D3-A1Q4-06	0.00324763	0.0907046	0.0713852	0.111973	0	0.570966	CNVCorC2	METCorC3	iC4
TCGA-D3-A1Q5-06	0.0492711	0.131205	0.0890924	0.0913306	0.0157202	0.330967	CNVCorC2	METCorC3	iC4
TCGA-D3-A1Q6-06	0.0947001	0.0774442	0.171872	0.127317	0	0.420204	CNVCorC2	METCorC3	iC4
TCGA-D3-A1Q7-06	0.145126	0.206587	0.56799	0.321569	0.0803937	1.19309	CNVCorC2	METCorC1	iC1
TCGA-D3-A1Q8-06	0.0435541	0.152221	0.10325	0.137055	0.279243	0.540784	CNVCorC2	METCorC3	iC4
TCGA-D3-A1QA-06	0.0408142	0.0774609	0.147565	0.0751483	0	0.402042	CNVCorC1	METCorC2	iC3
TCGA-D3-A1QB-06	0.0819466	0.209731	0.531691	0.22572	0.0322837	0.768642	CNVCorC1	METCorC1	iC1
TCGA-D3-A2J6-06	0.0529428	0.0148785	0.293462	0.0848887	0	0.42808	CNVCorC1	METCorC2	iC3
TCGA-D3-A2J7-06	0.113405	0.183756	0.235922	0.159728	0.104679	0.459441	CNVCorC2	METCorC3	iC1
TCGA-D3-A2J8-06	0.0816334	0.231323	0.392841	0.236247	0.0921742	0.768943	CNVCorC2	METCorC1	iC1
TCGA-D3-A2J9-06	0.198816	0.487142	0.919271	0.325648	0.0483274	1.18251	CNVCorC2	METCorC1	iC1
TCGA-D3-A2JA-06	0.0583731	0.25764	0.130483	0.197257	0.305374	0.748063	CNVCorC2	METCorC3	iC4
TCGA-D3-A2JB-06	0.67408	0.498959	0.222802	0.197737	0	0.910095	CNVCorC1	METCorC1	iC1
TCGA-D3-A2JC-06	0.0934973	0.0968824	0.189168	0.118364	0.00113722	0.601763	CNVCorC2	METCorC3	iC4
TCGA-D3-A2JD-06	0.303389	0.290958	0.0521781	0.0693323	0.0133191	0.499844	CNVCorC1	METCorC2	iC3
TCGA-D3-A2JE-06	0.0766169	0.0537136	0.0568884	0.0482828	0	0.266476	CNVCorC1	METCorC3	iC4
TCGA-D3-A2JF-06	0.1244	0.164645	0.148939	0.120609	0	0.52136	CNVCorC2	METCorC1	iC4
TCGA-D3-A2JG-06	0.0209704	0.0273039	0.106181	0.0530615	0	0.256911	CNVCorC2	METCorC2	iC3
TCGA-D3-A2JH-06	0	0.115987	0.84741	0.282074	0.0701425	0.835737	CNVCorC2	METCorC1	iC1
TCGA-D3-A2JK-06	0.0228714	0.121287	0	0.0434775	0	0.390081	CNVCorC1	METCorC2	iC3
TCGA-D3-A2JL-06	0.0783018	0.178045	0.208661	0.0862177	0	0.498003	CNVCorC1	METCorC2	iC1
TCGA-D3-A2JN-06	0.088338	0.101534	0.174746	0.077862	0	0.408829	CNVCorC2	METCorC3	iC4
TCGA-D3-A2JO-06	0.08604	0.217778	0.432346	0.194919	0.0750217	0.9681	CNVCorC2	METCorC1	iC1
TCGA-D3-A2JP-06	0.0262665	0.112815	0.264024	0.140354	0.133899	0.390945	CNVCorC2	METCorC3	iC4
TCGA-D3-A3BZ-06	0.148601	0.199888	0.26333	0.148796	0.147149	0.725804	CNVCorC1	METCorC2	iC1
TCGA-D3-A3C1-06	0.077369	0.13101	0.124009	0.0948724	0.0605827	0.327782	CNVCorC2	METCorC3	iC4
TCGA-D3-A3C3-06	0.0499763	0.147259	0.143449	0.0991937	0.0394443	0.405698	CNVCorC2	METCorC3	iC4
TCGA-D3-A3C6-06	0.0343975	0.121914	0	0.0713626	0	0.295396	CNVCorC2	METCorC3	iC4
TCGA-D3-A3C7-06	0.10861	0.0896538	0.331056	0.15721	0.173807	0.568291	CNVCorC2	METCorC3	iC4
TCGA-D3-A3C8-06	0.238938	0.0766424	1.53178	0.348034	0.114955	1.71065	CNVCorC2	METCorC1	iC1
TCGA-D3-A3CB-06	0.296812	0.243138	0.494023	0.229097	0.345517	1.18942	CNVCorC2	METCorC1	iC1
TCGA-D3-A3CC-06	0.0778563	0.0620733	0.0944042	0.0786766	0.0692819	0.330581	CNVCorC2	METCorC2	iC2
TCGA-D3-A3CE-06	0.18047	0.162356	0.277284	0.153297	0.0733766	0.682116	CNVCorC2	METCorC3	iC4
TCGA-D3-A3CF-06	0.301797	0.261246	0.248291	0.153384	0.139003	0.731241	CNVCorC1	METCorC2	iC1
TCGA-D3-A3ML-06	0.0422006	0.0311495	0.0627736	0.0385905	0	0.215447	CNVCorC2	METCorC3	iC2
TCGA-D3-A3MO-06	0.0438524	0.143014	0	0.0877861	0.0670895	0.315694	CNVCorC2	METCorC3	iC4
TCGA-D3-A3MR-06	0.104365	0.221569	0.326815	0.143121	0.0171625	0.632447	CNVCorC2	METCorC1	iC1
TCGA-D3-A3MU-06	0.0487185	0.110996	0.0557763	0.061875	0	0.387374	CNVCorC2	METCorC2	iC2
TCGA-D3-A3MV-06	0.0608789	0.0842399	0.0576877	0.0636004	0.0257523	0.351187	CNVCorC2	METCorC3	iC4
TCGA-D3-A51E-06	0.118495	0.0970678	0.22175	0.124484	0	0.672851	CNVCorC1	METCorC1	iC4
TCGA-D3-A51F-06	0.174455	0.293491	1.18081	0.33565	0.25876	1.59683	CNVCorC2	METCorC1	iC1
TCGA-D3-A51G-06	0.0578162	0.1157	0.142751	0.103321	0.0521031	0.394004	CNVCorC2	METCorC3	iC4
TCGA-D3-A51H-06	1.37685	0.959271	0.167309	0.283346	0.196192	0.922163	CNVCorC2	METCorC1	iC1
TCGA-D3-A51J-06	0.0524669	0.0392392	0.854827	0.231895	0.0888524	0.804864	CNVCorC2	METCorC1	iC1
TCGA-D3-A51K-06	0.0998367	0.148161	0	0.0513452	0	0.392869	CNVCorC1	METCorC2	iC3
TCGA-D3-A51N-06	0.0762503	0.0899335	0.143488	0.130332	0.0146986	0.472579	CNVCorC2	METCorC1	iC4
TCGA-D3-A51R-06	0.0420319	0.0924329	0.0222269	0.0449197	0	0.243563	CNVCorC2	METCorC3	iC4
TCGA-D3-A51T-06	0.0957624	0.128073	0.11778	0.0897585	0.029145	0.37788	CNVCorC2	METCorC2	iC3
TCGA-D3-A5GL-06	0.105819	0.0814432	0.0809317	0.0685696	0.0466815	0.305306	CNVCorC1	METCorC2	iC3
TCGA-D3-A5GN-06	0.0532041	0.0635033	0.23372	0.128983	0	0.432972	CNVCorC2	METCorC3	iC4
TCGA-D3-A5GO-06	0.0982726	0.0747971	0.157503	0.111588	0.0210819	0.476391	CNVCorC2	METCorC1	iC3
TCGA-D3-A5GR-06	0.206189	0.209561	0.182327	0.165892	0.0242019	0.547121	CNVCorC2	METCorC3	iC1
TCGA-D3-A5GS-06	0.0761695	0.128579	0.0982214	0.103261	0.0442205	0.484722	CNVCorC2	METCorC2	iC4
TCGA-D3-A5GT-01	0.0172874	0.026728	0.0404015	0.0177557	0	0.190026	CNVCorC1	METCorC2	iC2
TCGA-D3-A5GU-06	0.142385	0.0952388	0.136563	0.0630261	0.0306338	0.51677	CNVCorC2	METCorC3	iC2
TCGA-D3-A8GB-06	0.121623	0.213499	0.16493	0.121416	0.0806592	0.518305	CNVCorC1	METCorC1	iC1
TCGA-D3-A8GC-06	0.062391	0.0696816	0.125137	0.0903553	0.0400541	0.408007	CNVCorC2	METCorC3	iC2
TCGA-D3-A8GD-06	0.220388	0.380525	0.585405	0.275075	0.13807	0.867693	CNVCorC2	METCorC1	iC1
TCGA-D3-A8GE-06	0.0227024	0.198739	0.35064	0.118712	0.231286	0.750949	CNVCorC2	METCorC3	iC4
TCGA-D3-A8GI-06	0.0531224	0.114845	0.0157407	0.0506561	0	0.410259	CNVCorC1	METCorC2	iC3
TCGA-D3-A8GJ-06	0.0793965	0.0470375	0.749886	0.193278	0	0.908916	CNVCorC2	METCorC1	iC1
TCGA-D3-A8GK-06	0.0582362	0.0689736	0.0476872	0.0378673	0	0.277436	CNVCorC1	METCorC2	iC3
TCGA-D3-A8GL-06	0.0168484	0.117176	0.0572712	0.040396	0	0.247687	CNVCorC1	METCorC2	iC2
TCGA-D3-A8GM-06	0.0577809	0.180894	0.168097	0.147933	0.0590468	0.528466	CNVCorC1	METCorC2	iC3
TCGA-D3-A8GN-06	0.145931	0.107113	0.189547	0.125611	0	0.472939	CNVCorC2	METCorC1	iC1
TCGA-D3-A8GO-06	0.20301	0.183406	0.00309923	0.0606749	0	0.423234	CNVCorC2	METCorC3	iC4
TCGA-D3-A8GP-06	0.00600861	0.0735477	0.0488724	0.0562169	0	0.271492	CNVCorC2	METCorC3	iC2
TCGA-D3-A8GQ-06	0.073856	0.127462	0.0222197	0.0581557	0.0200407	0.34622	CNVCorC2	METCorC3	iC4
TCGA-D3-A8GR-06	0	0.0685067	0.119527	0.0626021	0.1026	0.208232	CNVCorC1	METCorC2	iC2
TCGA-D3-A8GS-06	0.100121	0.127458	0.334009	0.162348	0.107686	0.507181	CNVCorC2	METCorC1	iC1
TCGA-D3-A8GV-06	0.047483	0.0553875	0.100164	0.0598018	0	0.306825	CNVCorC1	METCorC3	iC4
TCGA-D9-A148-06	0.0568099	0.103931	0.141135	0.0656402	0	0.399972	CNVCorC1	METCorC2	iC3
TCGA-D9-A149-06	0.0349926	0.187397	0.120234	0.145977	0	0.542189	CNVCorC2	METCorC1	iC2
TCGA-D9-A1JW-06	0.0784704	0.178109	0.208467	0.108712	0.05696	0.571175	CNVCorC1	METCorC2	iC3
TCGA-D9-A1JX-06	0.035971	0.113167	0.274581	0.151567	0.0875512	0.564007	CNVCorC2	METCorC2	iC4
TCGA-D9-A1X3-06	0.0521932	0.104127	0.0717187	0.0633482	0.0108141	0.292547	CNVCorC2	METCorC3	iC2
TCGA-D9-A3Z1-06	0.146595	0.0233279	0.514459	0.161629	0.132605	0.702321	CNVCorC1	METCorC2	iC1
TCGA-D9-A3Z3-06	0.293129	0.134306	0.158164	0.078725	0.0246695	0.631961	CNVCorC1	METCorC2	iC3
TCGA-D9-A3Z4-01	0.0309725	0.154466	0.103657	0.128182	0.0598252	0.417366	CNVCorC2	METCorC3	iC4
TCGA-D9-A4Z2-01	0.0545246	0.0961974	0.0699211	0.0937994	0.0294272	0.370312	CNVCorC2	METCorC3	iC4
TCGA-D9-A4Z3-01	0.0573908	0.0417999	0.136902	0.0679925	0.000462904	0.345553	CNVCorC2	METCorC3	iC4
TCGA-D9-A4Z5-01	0	0.117592	0.0650139	0.0698334	0.190442	0.340095	CNVCorC2	METCorC3	iC2
TCGA-D9-A4Z6-06	0.0223725	0.102468	0.0790649	0.0947653	0	0.345338	CNVCorC1	METCorC2	iC3
TCGA-D9-A6E9-06	0.056776	0.0677123	0.829924	0.193386	0.124457	0.930077	CNVCorC1	METCorC1	iC1
TCGA-D9-A6EA-06	0.0220082	0.118137	0.0485764	0.0704252	0	0.311668	CNVCorC2	METCorC3	iC2
TCGA-D9-A6EC-06	0.0294669	0.0978979	0.0444215	0.0691061	0	0.346552	CNVCorC2	METCorC3	iC2
TCGA-D9-A6EG-06	0.0120454	0.131564	0.048934	0.0689862	0	0.327478	CNVCorC1	METCorC2	iC2
TCGA-DA-A1HV-06	0.407498	0.0759659	0.22359	0.0689968	0	1.17012	CNVCorC2	METCorC1	iC4
TCGA-DA-A1HW-06	0.0865263	0.137494	0.367323	0.166165	0.0601225	0.590538	CNVCorC2	METCorC2	iC4
TCGA-DA-A1HY-06	0.145204	0.0930972	0.0896055	0.100133	0.00357643	0.390819	CNVCorC2	METCorC3	iC4
TCGA-DA-A1I0-06	0.0827469	0.186471	0	0.06088	0.000910253	0.495964	CNVCorC1	METCorC2	iC3
TCGA-DA-A1I1-06	0.0870416	0.19247	0.187232	0.184294	0.124453	0.615228	CNVCorC2	METCorC3	iC4
TCGA-DA-A1I2-06	0	0.189692	0.0693302	0.136927	0.0316644	0.346587	CNVCorC2	METCorC3	iC4
TCGA-DA-A1I4-06	0.00565854	0.0538841	0.1363	0.0927284	0.338103	0.56602	CNVCorC1	METCorC2	iC3
TCGA-DA-A1I5-06	0.0693782	0.147219	0.258543	0.12598	0.0873032	0.744001	CNVCorC2	METCorC1	iC3
TCGA-DA-A1I7-06	0.0963622	0.097634	0.0742281	0.0673755	0.00158907	0.419905	CNVCorC2	METCorC3	iC4
TCGA-DA-A1I8-06	0.146309	0.121668	0.0711867	0.102044	0.0497428	0.46664	CNVCorC2	METCorC3	iC4
TCGA-DA-A1IA-06	0.0272734	0.127644	0	0.0367047	0	0.291766	CNVCorC1	METCorC2	iC3
TCGA-DA-A1IB-06	0.523034	0.606813	0.394776	0.267231	0.0687082	1.15027	CNVCorC2	METCorC1	iC1
TCGA-DA-A1IC-06	0.0633065	0.176974	0.106746	0.0946957	0.093265	0.276595	CNVCorC1	METCorC3	iC2
TCGA-DA-A3F2-06	0.447607	0.198323	0.824986	0.0410821	0.531418	1.67629	CNVCorC1	METCorC1	iC1
TCGA-DA-A3F3-06	0.073392	0.0646677	0.134662	0.0821855	0	0.389824	CNVCorC2	METCorC3	iC4
TCGA-DA-A3F5-06	0.0643286	0.0359042	0.0958054	0.110018	0.00488644	0.302332	CNVCorC2	METCorC3	iC4
TCGA-DA-A3F8-06	0.068386	0.0844322	1.14376	0.331288	0.169109	1.04414	CNVCorC2	METCorC1	iC1
TCGA-DA-A95V-06	0.107944	0.103866	0.0748984	0.0541835	0	0.422725	CNVCorC1	METCorC2	iC3
TCGA-DA-A95W-06	0.0208699	0.102682	0.0598828	0.0594719	0	0.315436	CNVCorC2	METCorC3	iC2
TCGA-DA-A95X-06	0.0927424	0.133155	0.141387	0.117309	0.104325	0.443956	CNVCorC2	METCorC3	iC4
TCGA-DA-A95Y-06	0.0612886	0.0933052	0.0382896	0.043073	0	0.368184	CNVCorC1	METCorC2	iC3
TCGA-DA-A95Z-06	0.0117483	0.060843	0.0808994	0.0464576	0	0.285515	CNVCorC1	METCorC3	iC2
TCGA-DA-A960-01	0.0207216	0.0412967	0.0283171	0.0181937	0	0.200631	CNVCorC1	METCorC2	iC3
TCGA-EB-A1NK-01	0.06799	0.104627	0.0494554	0.0634553	0	0.387188	CNVCorC1	METCorC2	iC3
TCGA-EB-A24C-01	0.0342755	0.0718541	0.072711	0.0644952	0.0170619	0.283836	CNVCorC1	METCorC3	iC2
TCGA-EB-A24D-01	0.0541559	0.0860571	0.102686	0.0505768	0	0.286152	CNVCorC2	METCorC2	iC2
TCGA-EB-A299-01	0.0334751	0.1021	0.103058	0.0855707	0.00623017	0.386863	CNVCorC2	METCorC3	iC4
TCGA-EB-A3HV-01	0.0513111	0.114447	0.0107115	0.0484286	0.026575	0.421255	CNVCorC1	METCorC3	iC2
TCGA-EB-A3XB-01	0.0500681	0.105348	0.115828	0.0742457	0.0418105	0.413152	CNVCorC1	METCorC2	iC3
TCGA-EB-A3XC-01	0.0393302	0.0374982	0.189899	0.0879501	0	0.433588	CNVCorC1	METCorC2	iC3
TCGA-EB-A3XD-01	0.0759293	0.179333	0.177552	0.0875809	0.0501783	0.570968	CNVCorC1	METCorC2	iC3
TCGA-EB-A3XE-01	0.0505003	0.114399	0.0893085	0.0493495	0.00296434	0.355954	CNVCorC1	METCorC3	iC2
TCGA-EB-A3XF-01	0.0282541	0.122967	0.113877	0.158563	0.0095495	0.439172	CNVCorC2	METCorC3	iC4
TCGA-EB-A3Y6-01	0.0368737	0.104051	0.0900056	0.070209	0.00885451	0.344144	CNVCorC2	METCorC2	iC3
TCGA-EB-A3Y7-01	0.0554963	0.0982285	0	0.0138329	0.0589344	0.457607	CNVCorC1	METCorC2	iC3
TCGA-EB-A41A-01	0.0379664	0.104615	0.0529169	0.0523635	0	0.280221	CNVCorC2	METCorC3	iC2
TCGA-EB-A41B-01	0.0381994	0.0865357	0.0791984	0.0621542	0	0.296293	CNVCorC1	METCorC2	iC3
TCGA-EB-A42Y-01	0.076758	0.0669846	0.103437	0.0919833	0.0941618	0.356084	CNVCorC1	METCorC3	iC3
TCGA-EB-A42Z-01	0.0659282	0.0619638	0.130559	0.0796922	0.00293906	0.401579	CNVCorC2	METCorC3	iC2
TCGA-EB-A430-01	0.022366	0.062723	0.0958834	0.0478847	0	0.304444	CNVCorC1	METCorC2	iC3
TCGA-EB-A431-01	0.0255305	0.0538845	0.157364	0.0695073	0	0.334272	CNVCorC1	METCorC2	iC3
TCGA-EB-A44N-01	0.0923655	0.16272	0.14445	0.110688	0.0364929	0.459339	CNVCorC2	METCorC3	iC4
TCGA-EB-A44O-01	0.0892304	0.0441768	0.145798	0.0848953	0	0.404989	CNVCorC1	METCorC2	iC3
TCGA-EB-A44P-01	0.0380119	0.129329	0.0650803	0.067416	0	0.346422	CNVCorC2	METCorC3	iC4
TCGA-EB-A44Q-06	0.214434	0.185337	0.241366	0.122363	0.0719949	0.849509	CNVCorC1	METCorC2	iC3
TCGA-EB-A44R-06	0.0527975	0.172951	0.142233	0.097886	0.0358875	0.459946	CNVCorC1	METCorC3	iC3
TCGA-EB-A4IQ-01	0.0397465	0.0925368	0.0574377	0.0575548	0	0.330726	CNVCorC1	METCorC3	iC3
TCGA-EB-A4IS-01	0.268568	0.329829	0.18345	0.211618	0.00569016	0.684255	CNVCorC2	METCorC1	iC1
TCGA-EB-A4OY-01	0.0768061	0.0740109	0.0338165	0.011048	0	0.377928	CNVCorC1	METCorC2	iC3
TCGA-EB-A4OZ-01	0.107408	0.11984	0.162735	0.0430428	0	0.601282	CNVCorC1	METCorC1	iC1
TCGA-EB-A4P0-01	0.0270524	0.0887477	0.0588355	0.0539317	0	0.318595	CNVCorC1	METCorC2	iC3
TCGA-EB-A4XL-01	0.0274744	0.103223	0.126273	0.0908638	0	0.360447	CNVCorC2	METCorC3	iC4
TCGA-EB-A51B-01	0.411536	0	0.05634	0	0	0.843156	CNVCorC2	METCorC1	iC2
TCGA-EB-A550-01	0.00718133	0.0930015	0.0664323	0.0981544	0	0.381386	CNVCorC2	METCorC3	iC4
TCGA-EB-A551-01	0.0609879	0.159736	0.397975	0.216405	0.0176493	0.68913	CNVCorC2	METCorC1	iC1
TCGA-EB-A553-01	0.0274523	0.0589088	0.0439898	0.0284169	0	0.281683	CNVCorC1	METCorC2	iC2
TCGA-EB-A57M-01	0.0693544	0.117707	0.0699036	0.0643417	0.0231314	0.405728	CNVCorC1	METCorC2	iC3
TCGA-EB-A5FP-01	0.052406	0.0477181	0.112773	0.0479725	0	0.297093	CNVCorC1	METCorC2	iC3
TCGA-EB-A5KH-06	0.0505817	0.0940859	0.0212027	0.027926	0	0.269745	CNVCorC1	METCorC2	iC3
TCGA-EB-A5SE-01	0.0464965	0.0902711	0.0605982	0.0490424	0	0.28375	CNVCorC1	METCorC3	iC2
TCGA-EB-A5SF-01	0.0218992	0.0629335	0	0.0294035	0	0.28794	CNVCorC1	METCorC2	iC3
TCGA-EB-A5SG-06	0.215555	0.0734764	0.734374	0.196139	0.0417133	1.02085	CNVCorC2	METCorC1	iC1
TCGA-EB-A5SH-06	0.082734	0.129154	0.0218446	0.0327517	0	0.31767	CNVCorC1	METCorC2	iC2
TCGA-EB-A5UL-06	0.121761	0.125394	0.191014	0.0975867	0	0.473787	CNVCorC1	METCorC2	iC3
TCGA-EB-A5UM-01	0.0484401	0.139063	0.0703095	0.044883	0	0.333169	CNVCorC1	METCorC2	iC2
TCGA-EB-A5UN-06	0.0575328	0.123858	0.103631	0.139962	0.00726867	0.338176	CNVCorC2	METCorC3	iC1
TCGA-EB-A5VU-01	0.0504496	0.0601251	0.0815932	0.0780455	0.0474429	0.327208	CNVCorC2	METCorC3	iC4
TCGA-EB-A5VV-06	1.06312	1.43783	0.544479	0.356777	0.126073	1.32423	CNVCorC2	METCorC1	iC1
TCGA-EB-A6L9-06	0.372615	0.433006	0.123529	0.100299	0.0103537	0.678981	CNVCorC1	METCorC1	iC1
TCGA-EB-A6QY-01	0.0570214	0.0471723	0.131037	0.0816894	0	0.379416	CNVCorC1	METCorC2	iC3
TCGA-EB-A6QZ-01	0.0640368	0.0816074	0.0797103	0.0530732	0	0.325328	CNVCorC1	METCorC3	iC2
TCGA-EB-A6R0-01	0.0407175	0.0984366	0.232067	0.151474	0	0.512687	CNVCorC2	METCorC1	iC4
TCGA-EB-A82B-01	0.131	0.112075	0.0840762	0.0925487	0	0.438566	CNVCorC1	METCorC2	iC3
TCGA-EB-A82C-01	0.0636868	0.0704095	0.0555785	0.0385049	0	0.274113	CNVCorC1	METCorC2	iC2
TCGA-EB-A85I-01	0.0664202	0.060865	0.185851	0.0756903	0	0.437172	CNVCorC2	METCorC3	iC3
TCGA-EB-A85J-01	0.0844486	0.130604	0.265261	0.131756	0.0360189	0.589994	CNVCorC1	METCorC1	iC3
TCGA-EB-A97M-01	0.0655622	0.106128	0.0476697	0.0474796	0	0.41645	CNVCorC1	METCorC2	iC2
TCGA-EE-A17X-06	0.0362379	0.0753713	0.089385	0.0533895	0.0257498	0.354187	CNVCorC1	METCorC2	iC3
TCGA-EE-A17Y-06	0.124288	0.0955159	0.012418	0.0498012	0	0.328611	CNVCorC2	METCorC3	iC4
TCGA-EE-A17Z-06	0.0731224	0.0774105	0.0295914	0.0323495	0	0.278383	CNVCorC1	METCorC2	iC3
TCGA-EE-A180-06	0.0355731	0.0905183	0.0704494	0.0591398	0	0.322295	CNVCorC1	METCorC2	iC2
TCGA-EE-A181-06	0.168942	0.195171	0.254185	0.177666	0.0307526	0.769207	CNVCorC2	METCorC1	iC4
TCGA-EE-A182-06	0.0454279	0.135233	0	0.0282031	0.0956653	0.455088	CNVCorC1	METCorC2	iC3
TCGA-EE-A183-06	0.228412	0.36594	0.072999	0.0932782	0.0444271	0.584658	CNVCorC1	METCorC2	iC3
TCGA-EE-A184-06	0.0471128	0.114843	0.160491	0.0552516	0.015728	0.523483	CNVCorC1	METCorC2	iC3
TCGA-EE-A185-06	0.0501781	0.0464464	0.0681629	0.0488366	0	0.296088	CNVCorC1	METCorC2	iC3
TCGA-EE-A20B-06	0.0420287	0.151826	0.148148	0.0984809	0.101707	0.510436	CNVCorC2	METCorC3	iC4
TCGA-EE-A20C-06	0.0272791	0.0605059	0.0675022	0.0775966	0	0.266952	CNVCorC2	METCorC3	iC4
TCGA-EE-A20F-06	0.0974865	0.0982549	0.142414	0.0994377	0.0236204	0.503577	CNVCorC1	METCorC2	iC4
TCGA-EE-A20H-06	0.0618714	0.0847951	0.0719468	0.0656946	0	0.377331	CNVCorC2	METCorC3	iC4
TCGA-EE-A20I-06	0.0572695	0.115626	0.108848	0.0854266	0.00257279	0.396041	CNVCorC1	METCorC2	iC3
TCGA-EE-A29A-06	0.0362643	0.0669335	0.0745411	0.0557257	0	0.29888	CNVCorC2	METCorC3	iC2
TCGA-EE-A29B-06	0.0263255	0.137461	0	0.0537685	0	0.373518	CNVCorC1	METCorC2	iC2
TCGA-EE-A29C-06	0.0685202	0.0944292	0.0803325	0.0700297	0.0477751	0.43894	CNVCorC1	METCorC2	iC3
TCGA-EE-A29D-06	0.0321447	0.146789	0.0296814	0.0735521	0.0132611	0.35469	CNVCorC1	METCorC2	iC4
TCGA-EE-A29E-06	0.0888046	0.0945182	0.0453509	0.0767645	0	0.396023	CNVCorC1	METCorC2	iC3
TCGA-EE-A29G-06	0.0465349	0.104236	0.164748	0.0926677	0.105076	0.445756	CNVCorC2	METCorC3	iC4
TCGA-EE-A29H-06	0.103098	0.0686416	0.145559	0.0641584	0	0.420008	CNVCorC1	METCorC2	iC3
TCGA-EE-A29L-06	0.0300234	0.0222238	0.11608	0.0457586	0	0.260764	CNVCorC1	METCorC2	iC2
TCGA-EE-A29M-06	0.108453	0.141739	0.256308	0.123317	0	0.510451	CNVCorC1	METCorC2	iC3
TCGA-EE-A29N-06	0.178749	0.237052	0.244852	0.14454	0.00791083	0.748096	CNVCorC2	METCorC3	iC1
TCGA-EE-A29P-06	0.0875154	0.258946	0.362488	0.212902	0.0277674	0.846417	CNVCorC2	METCorC1	iC1
TCGA-EE-A29Q-06	0.0886694	0.0952982	0.0677248	0.073959	0	0.321037	CNVCorC2	METCorC3	iC4
TCGA-EE-A29R-06	0.0342004	0.0821497	0.0625274	0.0553182	0	0.299306	CNVCorC2	METCorC3	iC4
TCGA-EE-A29S-06	0.0612991	0.114193	0.16922	0.0709125	0.0696696	0.456354	CNVCorC2	METCorC3	iC2
TCGA-EE-A29T-06	0.0992482	0.0638521	0.212201	0.11841	0.231297	0.550551	CNVCorC2	METCorC3	iC1
TCGA-EE-A29V-06	0.0915181	0.0968593	0.0118805	0.0474394	0	0.391563	CNVCorC1	METCorC2	iC3
TCGA-EE-A29W-06	0.109106	0.0596975	0.164414	0.0733334	0.0721771	0.287643	CNVCorC2	METCorC3	iC4
TCGA-EE-A29X-06	0.141009	0.0920926	0.212483	0.102146	0.0955659	0.606432	CNVCorC2	METCorC3	iC2
TCGA-EE-A2A0-06	0.159701	0.088017	0.435892	0.162943	0.375589	0.668688	CNVCorC2	METCorC1	iC1
TCGA-EE-A2A1-06	0.289578	0.234962	0.217524	0.139546	0.191609	0.835426	CNVCorC1	METCorC2	iC1
TCGA-EE-A2A2-06	0.122648	0.145142	0.121222	0.0883143	0	0.40788	CNVCorC1	METCorC2	iC3
TCGA-EE-A2A5-06	0.0479106	0.0989883	0.0827408	0.0698922	0.0486272	0.320461	CNVCorC2	METCorC3	iC2
TCGA-EE-A2A6-06	0.127685	0.180953	0.332329	0.162688	0.0495135	0.535362	CNVCorC2	METCorC3	iC1
TCGA-EE-A2GB-06	0.0579617	0.117383	0.10926	0.0711197	0	0.424051	CNVCorC1	METCorC2	iC3
TCGA-EE-A2GC-06	0.126791	0.118471	0.337707	0.188859	0.192947	0.605215	CNVCorC2	METCorC1	iC4
TCGA-EE-A2GD-06	0.0732699	0.124603	0.178282	0.12202	0.20276	0.568717	CNVCorC2	METCorC3	iC1
TCGA-EE-A2GE-06	0.187604	0.168125	0.414792	0.188059	0.218444	1.0364	CNVCorC2	METCorC1	iC1
TCGA-EE-A2GH-06	0.0860616	0.0809588	0.48979	0.134074	0.0670485	0.69208	CNVCorC2	METCorC1	iC1
TCGA-EE-A2GI-06	0.112562	0.185601	0.134801	0.139263	0	0.47918	CNVCorC1	METCorC1	iC4
TCGA-EE-A2GJ-06	0.0875223	0.189929	0.165494	0.163068	0.225719	0.708939	CNVCorC2	METCorC3	iC2
TCGA-EE-A2GK-06	1.54565	1.43105	0.254081	0.399165	0.105039	1.30851	CNVCorC2	METCorC1	iC1
TCGA-EE-A2GL-06	0.458726	0.470263	0.183354	0.143158	0.0391914	0.754446	CNVCorC2	METCorC3	iC1
TCGA-EE-A2GM-06	0.0381933	0.0734613	0.0796966	0.0548235	0.0521774	0.294423	CNVCorC1	METCorC2	iC2
TCGA-EE-A2GN-06	0.0817408	0.127508	0	0.0642766	0.0356929	0.356866	CNVCorC1	METCorC2	iC4
TCGA-EE-A2GO-06	0.0538565	0	0.23176	0.0582943	0	0.317654	CNVCorC2	METCorC3	iC4
TCGA-EE-A2GP-06	0.0533673	0.110291	0.17772	0.134719	0.27283	0.516335	CNVCorC2	METCorC3	iC4
TCGA-EE-A2GR-06	0.0582788	0.0681857	0.0902884	0.0487393	0	0.27028	CNVCorC1	METCorC2	iC2
TCGA-EE-A2GS-06	0.0590806	0.149137	0.0899763	0.109692	0	0.437321	CNVCorC2	METCorC3	iC4
TCGA-EE-A2GT-06	0.305705	0.458376	0.127501	0.108259	0.0583426	0.664783	CNVCorC1	METCorC2	iC1
TCGA-EE-A2GU-06	0.141345	0.126592	0.412103	0.164253	0	0.820041	CNVCorC2	METCorC1	iC2
TCGA-EE-A2M5-06	0.0447607	0.120436	0.185038	0.15644	0.0161832	0.469116	CNVCorC2	METCorC3	iC4
TCGA-EE-A2M6-06	0.0870495	0.0653217	0.137209	0.111742	0.0585285	0.555167	CNVCorC2	METCorC3	iC4
TCGA-EE-A2M7-06	0.120271	0.305084	0.199166	0.128928	0.0601469	0.595851	CNVCorC2	METCorC3	iC4
TCGA-EE-A2M8-06	0.0714568	0.388806	0.905767	0.306017	0.244508	1.30012	CNVCorC2	METCorC1	iC1
TCGA-EE-A2MC-06	0.0593418	0.202154	0.416783	0.252124	0.0951064	0.765539	CNVCorC2	METCorC1	iC1
TCGA-EE-A2MD-06	0.0829497	0.105624	0.214545	0.095611	0.0147567	0.452741	CNVCorC1	METCorC2	iC3
TCGA-EE-A2ME-06	0.446937	0.724496	0.772454	0.27613	0.167833	1.43096	CNVCorC2	METCorC1	iC1
TCGA-EE-A2MF-06	0.032216	0.148346	0.110756	0.117244	0.0622682	0.39562	CNVCorC2	METCorC3	iC2
TCGA-EE-A2MG-06	0.427755	0.549757	0.31849	0.200254	0.104131	0.830123	CNVCorC2	METCorC1	iC1
TCGA-EE-A2MH-06	0.178463	0.267048	0.178607	0.114296	0.0549843	0.541635	CNVCorC2	METCorC3	iC1
TCGA-EE-A2MI-06	0.0765212	0.243236	0.0553064	0.17796	0.200261	0.660884	CNVCorC2	METCorC1	iC4
TCGA-EE-A2MJ-06	0.211515	0.304653	0.383975	0.210282	0.0402655	0.75185	CNVCorC2	METCorC1	iC1
TCGA-EE-A2MK-06	0.0554945	0.183079	0.19691	0.149508	0.0999518	0.553774	CNVCorC2	METCorC3	iC4
TCGA-EE-A2ML-06	0.153898	0.180128	0.266493	0.133988	0.127054	0.529976	CNVCorC2	METCorC2	iC4
TCGA-EE-A2MM-06	0.0391897	0.127531	0.0947155	0.11728	0.0207998	0.355576	CNVCorC2	METCorC3	iC2
TCGA-EE-A2MN-06	0.0700227	0.140621	0.174969	0.13026	0.0978719	0.49875	CNVCorC2	METCorC1	iC2
TCGA-EE-A2MP-06	0.105952	0.0712558	0.24325	0.0981185	0.0631041	0.630913	CNVCorC2	METCorC3	iC4
TCGA-EE-A2MQ-06	0.0738234	0.0997876	0.145188	0.0712427	0.0656745	0.424817	CNVCorC2	METCorC3	iC2
TCGA-EE-A2MR-06	0.331275	0.703516	0.425581	0.327864	0.256634	1.08304	CNVCorC2	METCorC1	iC1
TCGA-EE-A2MS-06	0.0823896	0.135623	0.0769632	0.0785462	0.0703425	0.418914	CNVCorC2	METCorC3	iC2
TCGA-EE-A2MT-06	0.0393056	0.0296942	0.243154	0.0818457	0	0.434884	CNVCorC1	METCorC3	iC3
TCGA-EE-A2MU-06	0.0591857	0.16032	0.240318	0.157614	0.167235	0.81382	CNVCorC1	METCorC1	iC1
TCGA-EE-A3AA-06	0.228649	0.265663	0.144081	0.148969	0.00471633	0.65131	CNVCorC2	METCorC3	iC1
TCGA-EE-A3AB-06	0.0770403	0.133744	0.0711709	0.154515	0.250434	0.549792	CNVCorC2	METCorC3	iC4
TCGA-EE-A3AC-06	0.0284307	0.170275	0.162408	0.162254	0.107328	0.438766	CNVCorC2	METCorC3	iC2
TCGA-EE-A3AD-06	0.0308747	0.11572	0.04592	0.0597586	0	0.266691	CNVCorC2	METCorC2	iC3
TCGA-EE-A3AF-06	0.0332387	0.130009	0.0839549	0.0924588	0.0632062	0.487439	CNVCorC1	METCorC2	iC3
TCGA-EE-A3AG-06	0.0576944	0.0696392	0.0901936	0.0610197	0	0.33503	CNVCorC2	METCorC3	iC4
TCGA-EE-A3AH-06	0.0437732	0.0830185	0.100507	0.0668006	0.0266672	0.320583	CNVCorC2	METCorC3	iC4
TCGA-EE-A3J3-06	0.0436689	0.131869	0.089133	0.106441	0	0.427319	CNVCorC2	METCorC3	iC4
TCGA-EE-A3J4-06	0.0190928	0.114463	0	0.0693146	0	0.318457	CNVCorC2	METCorC3	iC2
TCGA-EE-A3J5-06	0.0972128	0.114799	0.123123	0.107405	0.0557465	0.527307	CNVCorC1	METCorC2	iC3
TCGA-EE-A3J7-06	0.0441894	0.0826807	0.0725361	0.0626559	0	0.325208	CNVCorC2	METCorC3	iC2
TCGA-EE-A3J8-06	0.0360598	0.0338619	0.0997752	0.0509333	0	0.26521	CNVCorC2	METCorC3	iC4
TCGA-EE-A3JA-06	0.127732	0.0498756	0.305639	0.108803	0.0635626	0.58978	CNVCorC2	METCorC2	iC4
TCGA-EE-A3JB-06	0.131044	0.132337	0.158286	0.123466	0.129293	0.665564	CNVCorC2	METCorC3	iC4
TCGA-EE-A3JD-06	0.613117	0.481973	0.419827	0.287	0.095311	1.23088	CNVCorC2	METCorC1	iC1
TCGA-EE-A3JE-06	0.256941	0.0957221	0.77331	0.238783	0.180264	1.09572	CNVCorC2	METCorC1	iC1
TCGA-EE-A3JH-06	0.325751	0.270468	0.46451	0.185427	0.213991	1.23662	CNVCorC2	METCorC1	iC1
TCGA-EE-A3JI-06	0.0196041	0.130634	0.158361	0.108712	0.112274	0.346062	CNVCorC2	METCorC3	iC2
TCGA-ER-A193-06	0.0372696	0.176874	0.198865	0.155927	0.0837017	0.536198	CNVCorC2	METCorC3	iC4
TCGA-ER-A194-01	0.0389794	0.106989	0.0757935	0.0416853	0	0.436927	CNVCorC1	METCorC2	iC3
TCGA-ER-A195-06	0.0613614	0.189414	0.356618	0.202072	0.311552	0.782578	CNVCorC2	METCorC3	iC4
TCGA-ER-A196-01	0.024711	0.0909113	0.105079	0.102588	0	0.397684	CNVCorC1	METCorC3	iC3
TCGA-ER-A197-06	0.0867148	0.114684	0.26544	0.180904	0.113816	0.7083	CNVCorC1	METCorC1	iC1
TCGA-ER-A198-06	0.0267711	0.0619781	0.23312	0.130691	0.127797	0.497106	CNVCorC1	METCorC2	iC2
TCGA-ER-A199-06	0.31569	0.229909	0.297232	0.130942	0.0942983	0.717579	CNVCorC2	METCorC3	iC1
TCGA-ER-A19A-06	0.196006	0.292611	0.727797	0.391883	0.545388	1.55713	CNVCorC2	METCorC1	iC1
TCGA-ER-A19B-06	0.0448563	0.0758066	0.140565	0.0814004	0	0.387412	CNVCorC2	METCorC3	iC4
TCGA-ER-A19C-06	0.115459	0.0684759	0.113353	0.0664548	0.017815	0.390117	CNVCorC1	METCorC2	iC3
TCGA-ER-A19D-06	0.0688222	0.186482	0.145466	0.124167	0.213799	0.589011	CNVCorC2	METCorC3	iC4
TCGA-ER-A19E-06	0.0616855	0.0918742	0.0517284	0.0679532	0.0506334	0.379751	CNVCorC2	METCorC3	iC4
TCGA-ER-A19F-06	0.0536526	0.0800204	0.0793694	0.0574333	0	0.368861	CNVCorC1	METCorC2	iC4
TCGA-ER-A19G-06	0.0590064	0.0849542	0.27488	0.201375	0	0.71804	CNVCorC2	METCorC3	iC4
TCGA-ER-A19H-06	0.100564	0.145415	0.247189	0.125075	0.0841568	0.589496	CNVCorC2	METCorC3	iC4
TCGA-ER-A19J-06	0.0229224	0.0774525	0.114442	0.0851017	0.0819564	0.353867	CNVCorC2	METCorC3	iC2
TCGA-ER-A19K-01	0.0594675	0.0415455	0.149888	0.0843783	0	0.422143	CNVCorC1	METCorC2	iC3
TCGA-ER-A19L-06	0.0181233	0.104794	0.0631753	0.0700207	0.0301747	0.304344	CNVCorC2	METCorC3	iC2
TCGA-ER-A19M-06	0.0269567	0.0895892	0.246484	0.156225	0.00128529	0.636281	CNVCorC2	METCorC1	iC4
TCGA-ER-A19N-06	0.242417	0.132487	0.230103	0.135396	0.338274	1.09441	CNVCorC2	METCorC1	iC1
TCGA-ER-A19O-06	0.223824	0.240877	0.130485	0.0872808	0.346713	1.15076	CNVCorC1	METCorC1	iC1
TCGA-ER-A19P-06	0.296389	0.572155	0.601425	0.311953	0.145096	1.23036	CNVCorC2	METCorC1	iC1
TCGA-ER-A19Q-06	0.10371	0.0912937	0.254362	0.146485	0.176501	0.797753	CNVCorC1	METCorC2	iC3
TCGA-ER-A19S-06	0.0862497	0.218079	0.745375	0.281097	8.74882e-05	0.925489	CNVCorC2	METCorC1	iC1
TCGA-ER-A19T-01	0.130963	0.0779591	0.139297	0.0508881	0.0610012	0.249984	CNVCorC1	METCorC2	iC2
TCGA-ER-A19W-06	0.0749639	0.214754	0.795429	0.312268	0.241467	1.0363	CNVCorC2	METCorC1	iC1
TCGA-ER-A1A1-06	1.38378	1.27325	0.300515	0.338075	0.058365	1.32817	CNVCorC2	METCorC1	iC1
TCGA-ER-A2NC-06	0.0768216	0.223896	0.0522145	0.164623	0.332377	0.687385	CNVCorC2	METCorC3	iC4
TCGA-ER-A2ND-06	0.0168437	0.105767	0.00535347	0.072238	0	0.329685	CNVCorC1	METCorC2	iC2
TCGA-ER-A2NE-06	0.0454077	0.112855	0.0859677	0.0653881	0	0.285785	CNVCorC2	METCorC3	iC3
TCGA-ER-A2NF-01	0.0936221	0.134518	0.116583	0.065593	0	0.422606	CNVCorC1	METCorC2	iC3
TCGA-ER-A2NG-06	0.0309935	0.0717063	0.609337	0.24623	0.0533979	0.860639	CNVCorC2	METCorC1	iC1
TCGA-ER-A2NH-06	0.103845	0.117774	0.868013	0.277821	0.227697	1.06916	CNVCorC2	METCorC1	iC1
TCGA-ER-A3ES-06	0.0315476	0.0333216	0.0806685	0.0322503	0	0.214487	CNVCorC1	METCorC2	iC2
TCGA-ER-A3ET-06	0.106878	0.142728	0.125397	0.138206	0.146012	0.553717	CNVCorC2	METCorC3	iC4
TCGA-ER-A3EV-06	0.120547	0.0707025	0.142032	0.045454	0.0109764	0.366017	CNVCorC1	METCorC2	iC3
TCGA-ER-A3PL-06	0	0.213622	0	0.12549	0.147255	0.319543	CNVCorC2	METCorC3	iC2
TCGA-ER-A42H-01	0.0405065	0.110465	0.0434783	0.0485308	0	0.319816	CNVCorC1	METCorC3	iC2
TCGA-ER-A42K-06	0.0599809	0.088103	0.0965087	0.0734506	0	0.350106	CNVCorC2	METCorC3	iC4
TCGA-ER-A42L-06	0.0947745	0.096793	0.609016	0.233636	0.406877	0.733041	CNVCorC2	METCorC1	iC1
TCGA-FR-A2OS-01	0.0917196	0.0743596	0.0942805	0.0790593	0.0362352	0.40452	CNVCorC2	METCorC3	iC4
TCGA-FR-A3R1-01	0.0435314	0.104674	0.162066	0.126863	0	0.429177	CNVCorC2	METCorC1	iC2
TCGA-FR-A3YN-06	0.0576171	0.13186	0.204672	0.118697	0.132745	0.321133	CNVCorC2	METCorC2	iC4
TCGA-FR-A3YO-06	0.0539435	0.0680118	0.044824	0.0754449	0	0.409231	CNVCorC1	METCorC2	iC3
TCGA-FR-A44A-06	0.00434813	0.0465867	0.844131	0.25333	0.111362	0.96193	CNVCorC2	METCorC1	iC1
TCGA-FR-A69P-06	0.0470289	0.0775679	0.0585831	0.0617295	0.0352814	0.328562	CNVCorC1	METCorC3	iC4
TCGA-FR-A726-01	0.0221701	0.093281	0.0851435	0.0811745	0.00557734	0.327702	CNVCorC1	METCorC3	iC3
TCGA-FR-A728-01	0.014762	0.112827	0.153443	0.12178	0.00562082	0.494713	CNVCorC1	METCorC1	iC1
TCGA-FR-A729-06	0.0674226	0.344338	0.19691	0.211289	0.060048	0.666937	CNVCorC2	METCorC1	iC1
TCGA-FR-A7U8-06	0.0336019	0.0514232	0.034199	0.0372185	0	0.254282	CNVCorC1	METCorC3	iC2
TCGA-FR-A7U9-06	0.0879846	0.157077	0.188709	0.159521	0.194366	0.635725	CNVCorC2	METCorC3	iC1
TCGA-FR-A7UA-06	0.116119	0.384983	1.32702	0.41642	0.132139	1.59989	CNVCorC2	METCorC1	iC1
TCGA-FR-A8YC-06	0.0118793	0.0958248	0.0925202	0.0715423	0.0408355	0.275366	CNVCorC2	METCorC3	iC2
TCGA-FR-A8YD-06	0.0446429	0.0586177	0.0273118	0.026597	0	0.258062	CNVCorC1	METCorC2	iC2
TCGA-FR-A8YE-06	0.368782	0.888726	0.0953507	0.223167	0.161866	1.08067	CNVCorC2	METCorC1	iC1
TCGA-FS-A1YW-06	0.0594834	0.103734	0.0754902	0.0615897	0	0.305069	CNVCorC2	METCorC2	iC4
TCGA-FS-A1YX-06	0.048464	0.109767	0.126007	0.0974488	0.130655	0.345581	CNVCorC2	METCorC3	iC4
TCGA-FS-A1YY-06	0.0327064	0.0833698	0.0469491	0.0604204	0.0179073	0.317379	CNVCorC1	METCorC2	iC3
TCGA-FS-A1Z0-06	0.0854054	0.128529	0.271981	0.202017	0.0515946	0.668642	CNVCorC2	METCorC3	iC4
TCGA-FS-A1Z3-06	0.0710852	0.0955488	0.102248	0.0766078	0	0.339054	CNVCorC2	METCorC3	iC4
TCGA-FS-A1Z4-06	0.39381	0.414355	0.244863	0.24873	0.0195451	0.800302	CNVCorC2	METCorC3	iC1
TCGA-FS-A1Z7-06	0.0249098	0.120313	0.0871886	0.100662	0.166692	0.45771	CNVCorC2	METCorC3	iC4
TCGA-FS-A1ZA-06	0.00598584	0.0622388	0.125147	0.0792357	0.253825	0.435747	CNVCorC2	METCorC3	iC4
TCGA-FS-A1ZB-06	0.0514632	0.1525	0.0971411	0.134282	0.202584	0.577974	CNVCorC1	METCorC3	iC3
TCGA-FS-A1ZC-06	0.0891637	0.0773342	0.0395416	0.0582059	0	0.303959	CNVCorC2	METCorC3	iC4
TCGA-FS-A1ZD-06	0.100046	0.113708	0.156086	0.102274	0.109502	0.387329	CNVCorC2	METCorC3	iC4
TCGA-FS-A1ZE-06	0.0426683	0.055157	0.0817627	0.0506732	0	0.297507	CNVCorC2	METCorC2	iC2
TCGA-FS-A1ZF-06	0.0384529	0.0864348	0.0506439	0.0480138	0	0.298437	CNVCorC1	METCorC3	iC4
TCGA-FS-A1ZG-06	0.0327336	0.0951893	0.0944739	0.05305	0.0447475	0.290274	CNVCorC1	METCorC2	iC2
TCGA-FS-A1ZH-06	0.164942	0.223331	0.256626	0.177502	0.242165	0.670575	CNVCorC2	METCorC3	iC4
TCGA-FS-A1ZJ-06	0.0618487	0.0988092	0.0865144	0.0623133	0.00439472	0.341278	CNVCorC1	METCorC2	iC2
TCGA-FS-A1ZK-06	0.054049	0.0948489	0.0604343	0.046671	0	0.30259	CNVCorC1	METCorC2	iC3
TCGA-FS-A1ZM-06	0.10948	0.071888	0.391886	0.165067	0.180035	0.635513	CNVCorC2	METCorC3	iC4
TCGA-FS-A1ZN-01	0.0531464	0.100752	0.0533588	0.0544992	0	0.312361	CNVCorC2	METCorC3	iC2
TCGA-FS-A1ZP-06	0.0656176	0.127833	0.150754	0.0869981	0.127981	0.424028	CNVCorC2	METCorC3	iC2
TCGA-FS-A1ZQ-06	0.0643456	0.131783	0.0569285	0.0659038	0	0.431069	CNVCorC1	METCorC2	iC3
TCGA-FS-A1ZR-06	0.0584748	0.113172	0.12179	0.0718111	0.016898	0.381923	CNVCorC2	METCorC3	iC2
TCGA-FS-A1ZS-06	0.00790661	0.149363	0.247097	0.0809426	0.287847	0.360985	CNVCorC2	METCorC3	iC4
TCGA-FS-A1ZT-06	0.124462	0.195338	0.220196	0.135191	0.0701372	0.493547	CNVCorC1	METCorC2	iC4
TCGA-FS-A1ZU-06	0.0338303	0.0264244	0.0766991	0.0565872	0.034818	0.228133	CNVCorC1	METCorC3	iC2
TCGA-FS-A1ZW-06	0.273805	0.0614399	0.292951	0.175679	0.0307143	0.606663	CNVCorC2	METCorC1	iC4
TCGA-FS-A1ZY-06	0.0338835	0.0846485	0.0132565	0.0326606	0	0.241014	CNVCorC1	METCorC3	iC2
TCGA-FS-A1ZZ-06	0.0287406	0.093991	0.12138	0.0864325	0.0114134	0.235049	CNVCorC2	METCorC3	iC2
TCGA-FS-A4F0-06	0.0345331	0.170821	0.0528521	0.106395	0	0.308491	CNVCorC2	METCorC3	iC2
TCGA-FS-A4F2-06	0.0500169	0.0615475	0.0600339	0.079527	0.0245319	0.370586	CNVCorC2	METCorC3	iC3
TCGA-FS-A4F4-06	0.0519975	0.119461	0.0583176	0.0603228	0.00193395	0.428809	CNVCorC1	METCorC2	iC3
TCGA-FS-A4F5-06	0.0231581	0.119046	0.0779426	0.0800717	0.0719166	0.234062	CNVCorC2	METCorC3	iC2
TCGA-FS-A4F8-06	0.277059	0.499126	0.328301	0.165897	0.0774563	0.70947	CNVCorC2	METCorC1	iC1
TCGA-FS-A4F9-06	0.0320807	0.0709078	0.0557009	0.0506607	0	0.305308	CNVCorC1	METCorC3	iC2
TCGA-FS-A4FB-06	0.0812341	0.0925158	0.0610594	0.0407139	0.0185386	0.297199	CNVCorC2	METCorC3	iC4
TCGA-FS-A4FC-06	0.050058	0.128116	0.127887	0.0808773	0.115891	0.326273	CNVCorC2	METCorC3	iC2
TCGA-FS-A4FD-06	0.0278414	0.123031	0.0366814	0.0705068	0.029502	0.306876	CNVCorC2	METCorC3	iC4
TCGA-FW-A3I3-06	0.0405312	0.0812971	0.0724745	0.0549182	0	0.297377	CNVCorC2	METCorC3	iC4
TCGA-FW-A3R5-06	0.0908281	0.100952	0.135799	0.0996335	0.0479521	0.437124	CNVCorC1	METCorC2	iC2
TCGA-FW-A3TU-06	0.0226434	0.0959436	0.0153282	0.0479473	0	0.330842	CNVCorC1	METCorC2	iC3
TCGA-FW-A3TV-06	0.1731	0.121178	0.158702	0.102306	0.152072	0.34447	CNVCorC1	METCorC2	iC3
TCGA-FW-A5DX-01	0.0380003	0.0621369	0.124912	0.0715504	0	0.336057	CNVCorC2	METCorC3	iC4
TCGA-FW-A5DY-06	0.532461	0.420639	0.218138	0.149832	0.0932903	0.661701	CNVCorC2	METCorC1	iC1
TCGA-GF-A2C7-01	0.033581	0.0577512	0.0721226	0.0523593	0	0.274292	CNVCorC1	METCorC2	iC2
TCGA-GF-A3OT-06	0.0241532	0.0789431	0.251417	0.126434	0.120357	0.520242	CNVCorC2	METCorC3	iC4
TCGA-GF-A4EO-06	0.255603	0.188927	0.523349	0.242866	0.0502473	0.990256	CNVCorC2	METCorC1	iC1
TCGA-GF-A6C8-06	0.0429975	0.0964555	0.137089	0.114333	0	0.427657	CNVCorC2	METCorC3	iC4
TCGA-GF-A6C9-06	0.405525	0.285865	0.27767	0.226216	0.479958	0.648059	CNVCorC2	METCorC1	iC1
TCGA-GF-A769-01	0.0249249	0.0795564	0.0548442	0.0687321	0.0155898	0.293358	CNVCorC2	METCorC3	iC4
TCGA-GN-A262-06	0.0924792	0.0362591	0.0468055	0.00681968	0	0.426483	CNVCorC1	METCorC3	iC4
TCGA-GN-A263-01	0.022419	0	0.222619	0.0995729	0.0934081	0.344583	CNVCorC2	METCorC2	iC3
TCGA-GN-A264-06	0.0372477	0.0704642	0.11882	0.0724674	0.0391989	0.377656	CNVCorC2	METCorC2	iC2
TCGA-GN-A265-06	0.118887	0.200195	0.325131	0.227387	0.236179	0.836367	CNVCorC2	METCorC1	iC1
TCGA-GN-A266-06	0.108812	0.205765	0.214373	0.214691	0.31883	0.906569	CNVCorC2	METCorC1	iC4
TCGA-GN-A267-06	0.0399462	0.0691974	0.0916375	0.0462609	0	0.314353	CNVCorC1	METCorC3	iC2
TCGA-GN-A268-06	0.0380447	0.0628527	0.0752251	0.0572956	0	0.299937	CNVCorC1	METCorC2	iC2
TCGA-GN-A26A-06	0.0790987	0.00224537	0.342323	0.207524	0.0536044	0.625832	CNVCorC2	METCorC3	iC4
TCGA-GN-A26C-01	0.0156533	0.407482	0.0892251	0.360379	0.0727115	0.840494	CNVCorC2	METCorC1	iC1
TCGA-GN-A26D-06	0.140094	0.111203	0.0220576	0.0630748	0	0.317098	CNVCorC1	METCorC2	iC2
TCGA-GN-A4U3-06	0.0651444	0.0918109	0.094009	0.0783771	0.0332562	0.28741	CNVCorC2	METCorC3	iC4
TCGA-GN-A4U4-06	0.0326696	0.113234	0.0525164	0.0535277	0.00786816	0.247428	CNVCorC2	METCorC3	iC4
TCGA-GN-A4U5-01	0.110647	0.0913543	0.300121	0.109412	0.008314	0.628599	CNVCorC2	METCorC1	iC1
TCGA-GN-A4U7-06	0.0292455	0.0517603	0.057091	0.0264116	0	0.251081	CNVCorC1	METCorC2	iC3
TCGA-GN-A4U8-06	0.10717	0.159358	0.258609	0.133599	0.0422077	0.566075	CNVCorC2	METCorC1	iC1
TCGA-GN-A4U9-06	0.0366925	0.100165	0.0691069	0.097715	0.0314115	0.317133	CNVCorC2	METCorC3	iC4
TCGA-GN-A8LK-06	0.0221011	0.0576767	0.0445074	0.0382823	0	0.259912	CNVCorC1	METCorC2	iC3
TCGA-GN-A8LL-06	0.0562074	0.0891876	0.0428006	0.0398833	0	0.323368	CNVCorC1	METCorC2	iC3
TCGA-GN-A8LN-01	0.0581756	0.140632	0.0577935	0.0930808	0.0698605	0.39548	CNVCorC2	METCorC3	iC4
TCGA-GN-A9SD-06	0.228618	0.38942	0.226486	0.153902	0.139537	0.541582	CNVCorC1	METCorC1	iC1
TCGA-HR-A2OG-06	0.157901	0.155001	0.0937115	0.147412	0.0807131	0.532928	CNVCorC2	METCorC3	iC4
TCGA-HR-A2OH-06	0.114301	0.16082	1.01284	0.345163	0.121565	1.29275	CNVCorC2	METCorC1	iC1
TCGA-HR-A5NC-01	0.0219315	0.0924674	0.051569	0.0870471	0.052527	0.396609	CNVCorC1	METCorC3	iC4
TCGA-IH-A3EA-01	0.0355077	0.0673948	0.0315951	0.0441331	0	0.350742	CNVCorC1	METCorC2	iC2
TCGA-LH-A9QB-06	0.030442	0.0673388	0.0911716	0.0607237	0	0.274737	CNVCorC2	METCorC3	iC2
TCGA-OD-A75X-06	0.0616538	0.0800519	0.134896	0.0964751	0.0199461	0.358624	CNVCorC2	METCorC3	iC4
TCGA-QB-A6FS-06	0.125005	0.130423	0.166847	0.063115	0.0246871	0.564264	CNVCorC1	METCorC2	iC3
TCGA-QB-AA9O-06	0.0754396	0.0559751	0.267081	0.0780557	0	0.537945	CNVCorC1	METCorC3	iC3
TCGA-RP-A690-06	0.0164722	0.0630602	0.0878051	0.0604483	0	0.309437	CNVCorC1	METCorC2	iC2
TCGA-RP-A693-06	0.06521	0.217219	0.103293	0.150138	0.197819	0.47288	CNVCorC2	METCorC3	iC1
TCGA-RP-A694-06	0.0673595	0.0741825	0.171297	0.0728566	0.21181	0.352373	CNVCorC1	METCorC2	iC3
TCGA-RP-A695-06	0.0322571	0.0693357	0.0873601	0.0494176	0	0.329381	CNVCorC1	METCorC2	iC3
TCGA-RP-A6K9-06	0.0413597	0.128028	0.189192	0.0944848	0.132802	0.403263	CNVCorC2	METCorC3	iC2
TCGA-W3-A824-06	0.0762241	0.0768456	0.204294	0.11113	0	0.576231	CNVCorC1	METCorC1	iC2
TCGA-W3-A825-06	0.0506157	0.192399	0.18084	0.145935	0.174293	0.492638	CNVCorC2	METCorC3	iC4
TCGA-W3-A828-06	0.0917487	0.160764	0.117504	0.124089	0.238616	0.39397	CNVCorC2	METCorC3	iC4
TCGA-W3-AA1O-06	0.0301402	0.0734704	0.0737069	0.0618746	0	0.371099	CNVCorC1	METCorC2	iC3
TCGA-W3-AA1Q-06	0.0376045	0.0594114	0.140988	0.0570905	0	0.316186	CNVCorC2	METCorC3	iC2
TCGA-W3-AA1R-06	0.0438681	0.0660236	0.13163	0.0716388	0	0.336631	CNVCorC1	METCorC2	iC3
TCGA-W3-AA1V-06	0.107402	0.187411	0.260883	0.160137	0.198786	0.518162	CNVCorC2	METCorC3	iC4
TCGA-W3-AA1W-06	0.0640487	0.373256	0.822697	0.314869	0.0417206	1.20318	CNVCorC2	METCorC1	iC1
TCGA-W3-AA21-06	0.0236277	0.0527495	0.0452847	0.0311043	0	0.217831	CNVCorC1	METCorC3	iC2
TCGA-WE-A8JZ-06	0.0471456	0.093087	0.117319	0.0780778	0.0173334	0.277438	CNVCorC2	METCorC3	iC4
TCGA-WE-A8K1-06	0.0683431	0.13474	0.275446	0.11403	0.00775325	0.568268	CNVCorC2	METCorC2	iC1
TCGA-WE-A8K4-01	0.0153153	0.155474	0.408924	0.159011	0.00508166	0.555032	CNVCorC1	METCorC2	iC1
TCGA-WE-A8K5-06	0.0374926	0.114958	0.0641719	0.0785002	0	0.377994	CNVCorC1	METCorC3	iC2
TCGA-WE-A8K6-06	0.0446395	0.101774	0.0335026	0.0486942	0.0277666	0.312528	CNVCorC2	METCorC3	iC4
TCGA-WE-A8ZM-06	0.016502	0.119511	0.0246106	0.0640439	0	0.299265	CNVCorC2	METCorC3	iC4
TCGA-WE-A8ZN-06	0.0540793	0.0797361	0.137553	0.0474315	0	0.505805	CNVCorC1	METCorC2	iC3
TCGA-WE-A8ZO-06	0.00682821	0.166418	0.142508	0.144302	0.123929	0.43999	CNVCorC2	METCorC3	iC2
TCGA-WE-A8ZQ-06	0.0303547	0.0687659	0.161206	0.0791826	0.0142818	0.308003	CNVCorC2	METCorC3	iC2
TCGA-WE-A8ZR-06	0.0927031	0.14805	0.0320232	0.0648928	0.05892	0.366552	CNVCorC1	METCorC2	iC2
TCGA-WE-A8ZT-06	0.0530252	0.0720134	0.143258	0.0804627	0.0804013	0.290464	CNVCorC2	METCorC3	iC4
TCGA-WE-A8ZX-06	0.0920775	0.103603	0.230399	0.120454	0.0554872	0.522954	CNVCorC1	METCorC3	iC4
TCGA-WE-A8ZY-06	0.0511901	0.089108	0.145128	0.0786852	0	0.433371	CNVCorC2	METCorC3	iC2
TCGA-WE-AA9Y-06	0.072143	0.125363	0.0920493	0.0747281	0.0687911	0.406516	CNVCorC1	METCorC2	iC1
TCGA-WE-AAA0-06	0.109776	0.148456	0.14817	0.0971679	0.0383111	0.363519	CNVCorC2	METCorC2	iC3
TCGA-WE-AAA3-06	0.0553862	0.0827274	0.176407	0.0696687	0.0821103	0.515121	CNVCorC1	METCorC2	iC3
TCGA-WE-AAA4-06	0.0533547	0.107441	0.593255	0.178402	0.153397	0.998986	CNVCorC1	METCorC1	iC1
TCGA-XV-A9VZ-01	0.0423664	0.226267	0.142177	0.0488307	0.160361	0.2802	CNVCorC2	METCorC3	iC4
TCGA-XV-A9W2-01	0.0552273	0.0726254	0.0436167	0.0609862	0	0.29248	CNVCorC1	METCorC3	iC3
TCGA-XV-A9W5-01	0.0426973	0.0807425	0.106375	0.0665416	0	0.34223	CNVCorC2	METCorC3	iC4
TCGA-XV-AAZV-01	0.0629141	0.115121	0.168305	0.0999869	0.142698	0.608288	CNVCorC2	METCorC3	iC1
TCGA-XV-AAZW-01	0.0426637	0.0980058	0.0372381	0.0549861	0	0.289401	CNVCorC2	METCorC3	iC2
TCGA-XV-AAZY-01	0.0490063	0.146126	0.0255096	0.0339223	0	0.382099	CNVCorC1	METCorC2	iC3
TCGA-YD-A89C-06	0.0376993	0.0481753	0.0560666	0.0351231	0	0.252198	CNVCorC1	METCorC3	iC4
TCGA-YD-A9TA-06	0.160595	0.124776	0.170362	0.153555	0.10309	0.49989	CNVCorC2	METCorC3	iC4
TCGA-YD-A9TB-06	0.0479765	0.15195	0.123955	0.106448	0.11557	0.381445	CNVCorC2	METCorC3	iC4
TCGA-YG-AA3N-01	0.0496296	0.164307	0.200022	0.0769994	0.0246587	0.562991	CNVCorC1	METCorC2	iC3
TCGA-YG-AA3O-06	0.0294671	0.0655814	0.129031	0.072275	0.0057865	0.373707	CNVCorC1	METCorC2	iC2
TCGA-YG-AA3P-06	0.0210221	0.0547653	0.0489572	0.0330525	0	0.235856	CNVCorC1	METCorC3	iC2
TCGA-Z2-A8RT-06	0.0805521	0.186773	0.124067	0.124805	0.0219002	0.517887	CNVCorC2	METCorC3	iC4
TCGA-Z2-AA3S-06	0.0626179	0.0762816	0.124239	0.0761398	0.0416486	0.322748	CNVCorC1	METCorC3	iC2
TCGA-Z2-AA3V-06	0.10893	0.304979	0.107221	0.0843574	0.0957285	0.813132	CNVCorC1	METCorC2	iC3
