# Supplementary material for: Epigenomic and genomic analysis of transcriptome modulation in skin cutaneous melanoma
Source: Aging (Albany NY). 2020 Jul 7;12(13):12703–25. doi: 10.18632/aging.103115 (PMC7377867; doi:10.18632/aging.103115)
Supplement: Supplementary Table 7 [file aging-12-103115-s002..xlsx]

## Sheet: S7_Table
Supplementary Table 7. Differential CNV genes between iC1 and iC3 subtypes.
ID	iC1_amp	iC3_amp	iC1_del	iC3_del	iC1_Normal	iC3_Normal	FisherP
CWF19L2	1	6	11	58	87	49	1.11698e-11
IL10RA	1	3	14	63	84	47	8.22565e-11
NLRX1	1	2	14	63	84	48	1.11556e-10
H2AFX	1	2	14	63	84	48	1.11556e-10
TBCEL	1	2	15	63	83	48	5.2672e-10
CD3E	1	2	14	61	84	50	5.83516e-10
FLI1	1	2	15	61	83	50	2.24757e-09
CTSS	8	49	1	0	90	64	3.35037e-09
RFX5	8	49	1	0	90	64	3.35037e-09
PI4KB	8	49	1	0	90	64	3.35037e-09
TERF2IP	1	2	2	34	96	77	5.32886e-09
TUFT1	8	48	1	0	90	65	7.23415e-09
CYLD	0	0	3	37	96	76	9.27565e-09
SF3B4	8	47	1	1	90	65	1.54677e-08
BBS2	1	0	2	33	96	80	1.58112e-08
IRF8	1	2	4	38	94	73	1.99791e-08
BANP	0	1	5	39	94	73	3.14818e-08
STAMBPL1	0	0	12	52	87	61	4.81283e-08
PCGF5	0	0	12	52	87	61	4.81283e-08
SLC7A5	1	1	5	39	93	73	6.30421e-08
SLC38A7	1	0	2	31	96	82	7.01993e-08
GOT2	1	0	2	31	96	82	7.01993e-08
TYR	1	11	9	38	89	64	9.2944e-08
RAB38	1	11	9	38	89	64	9.2944e-08
FRA10AC1	0	0	12	51	87	62	9.66889e-08
CTSC	1	10	9	39	89	64	1.09175e-07
GFOD2	1	3	2	29	96	81	1.63081e-07
CCT3	10	47	1	0	88	66	1.70432e-07
TMEM79	10	47	1	0	88	66	1.70432e-07
PWWP2B	0	1	16	56	83	56	1.72675e-07
GRK5	0	0	15	55	84	58	2.01744e-07
PRRX1	10	45	0	2	89	66	2.04162e-07
NEK7	11	46	0	3	88	64	2.26779e-07
FAM65A	1	2	2	29	96	82	2.44945e-07
ATP6V0D1	1	2	2	29	96	82	2.44945e-07
PTPRC	11	47	0	2	88	64	2.56369e-07
EFNA4	11	48	0	0	88	65	2.57129e-07
FLAD1	11	48	0	0	88	65	2.57129e-07
STK32C	0	0	16	56	83	57	2.63052e-07
EXOC6	0	0	13	51	86	62	2.787e-07
SORCS1	0	0	13	51	86	62	2.787e-07
CASP7	0	0	14	53	85	60	3.08723e-07
GOLGA7B	0	1	14	52	85	60	3.08723e-07
CDH3	1	1	2	29	96	83	3.9321e-07
PRCC	10	46	1	1	88	66	4.07904e-07
NT5M	2	1	6	38	91	74	4.47787e-07
PEMT	2	1	6	38	91	74	4.47787e-07
SPOCK2	0	1	13	50	86	62	4.72617e-07
VANGL2	11	47	1	0	87	66	5.07067e-07
SLAMF6	11	47	1	0	87	66	5.07067e-07
ANAPC16	0	0	13	50	86	63	5.40973e-07
PIK3AP1	0	0	14	52	85	61	6.15392e-07
UBAP2L	12	48	0	0	87	65	7.3435e-07
EIF5A	1	0	7	39	91	74	7.5183e-07
FCGR2A	11	46	1	2	87	65	8.05681e-07
SLAMF8	10	45	1	1	88	67	8.14597e-07
RABGAP1L	11	44	0	3	88	66	8.87385e-07
SCARF1	2	0	8	40	89	73	9.87323e-07
SLC43A2	2	0	8	40	89	73	9.87323e-07
SLAMF7	11	46	1	0	87	67	9.89324e-07
CD48	11	46	1	0	87	67	9.89324e-07
PTPRE	0	0	16	54	83	59	1.01192e-06
SLC19A2	10	44	1	2	88	67	1.13975e-06
IPO9	11	44	0	2	88	67	1.18722e-06
ABCC2	0	0	14	51	85	62	1.21119e-06
LRRC8C	0	11	2	17	97	85	1.2417e-06
CREG1	11	45	1	2	87	66	1.58317e-06
AIM2	11	45	1	2	87	66	1.58317e-06
RCSD1	11	45	1	2	87	66	1.58317e-06
ARHGAP30	11	45	1	2	87	66	1.58317e-06
KDM5B	10	42	0	2	89	69	1.59103e-06
ATP1B1	10	44	1	1	88	68	1.60804e-06
COMTD1	0	1	12	46	87	66	1.79638e-06
ABR	2	1	8	40	89	72	2.18191e-06
TMEM220	1	2	7	37	91	74	2.27968e-06
PRF1	0	0	14	50	85	63	2.35326e-06
ALOX5	0	0	12	46	87	67	2.68714e-06
PPIF	0	0	14	49	85	64	2.69378e-06
ZCCHC24	0	0	14	49	85	64	2.69378e-06
MYH10	1	0	7	37	91	76	2.83387e-06
ARPC5	11	43	1	4	87	66	2.85094e-06
2019-09-15	1	10	1	17	97	86	3.84642e-06
KIAA0040	11	43	1	3	87	67	3.8499e-06
CAMKK1	3	1	7	37	89	75	3.95978e-06
AKAP10	1	3	6	34	92	76	4.11271e-06
FAM83G	1	3	6	34	92	76	4.11271e-06
TVP23B	2	2	6	35	91	76	5.06349e-06
DHX33	2	1	7	36	90	76	5.81206e-06
KIF1C	2	1	7	36	90	76	5.81206e-06
PARVA	0	5	2	21	97	87	6.23719e-06
ARHGAP12	0	1	12	44	87	68	6.57045e-06
ZEB1	0	1	12	44	87	68	6.57045e-06
TMEM11	2	2	6	34	91	77	8.46704e-06
ZNF438	0	0	12	44	87	69	9.40786e-06
ZRANB2	1	8	0	14	98	91	9.78659e-06
NCLN	1	1	2	24	96	88	1.0615e-05
S1PR4	1	1	2	24	96	88	1.0615e-05
ZBED5	0	4	2	21	97	88	1.06179e-05
TMEM9B	0	4	2	21	97	88	1.06179e-05
MIER1	1	9	0	13	98	91	1.06773e-05
APBB1IP	0	1	12	43	87	69	1.23394e-05
FAR1	0	5	2	20	97	88	1.3016e-05
SPTY2D1	0	5	2	20	97	88	1.3016e-05
ZDHHC13	0	5	2	20	97	88	1.3016e-05
ARID4B	12	42	1	4	86	67	1.34384e-05
SPOP	2	21	1	6	96	86	1.3787e-05
FH	13	45	1	1	85	67	1.42292e-05
RAB3A	1	5	0	15	98	93	1.63435e-05
UBB	1	2	7	34	91	77	1.63891e-05
USP35	3	20	8	23	88	70	1.80054e-05
ALOX5AP	2	18	4	16	93	79	1.82116e-05
B3GALTL	2	18	4	16	93	79	1.82116e-05
ZNF25	0	2	12	41	87	70	2.07661e-05
N4BP2L1	2	17	4	17	93	79	2.14067e-05
SLC7A1	2	17	4	17	93	79	2.14067e-05
N4BP2L2	2	17	4	17	93	79	2.14067e-05
ITPKB	11	38	2	8	86	67	2.15513e-05
PSEN2	11	38	2	8	86	67	2.15513e-05
GBP5	1	10	2	17	96	86	2.2171e-05
MCOLN2	2	12	1	15	96	86	2.46477e-05
RASSF5	12	40	0	3	87	70	2.51542e-05
FAM46C	2	17	2	13	95	83	2.71691e-05
USP33	1	10	1	14	97	89	2.85525e-05
GAB2	3	20	8	22	88	71	2.93128e-05
SPATA20	2	21	1	4	96	88	3.04568e-05
ARRB2	2	1	8	35	89	77	3.84511e-05
PELP1	2	1	8	35	89	77	3.84511e-05
TNFSF13B	1	15	7	20	91	78	3.97455e-05
MGAT5B	4	25	1	5	94	83	4.39199e-05
UBE2O	4	25	1	5	94	83	4.39199e-05
PTGFRN	2	15	2	14	95	84	4.48937e-05
ARL14EP	0	5	2	18	97	90	4.53986e-05
GBP3	1	10	2	16	96	87	5.31331e-05
MCF2L	2	17	7	20	90	76	5.5282e-05
IL15RA	0	3	13	40	86	70	5.87791e-05
TRIM5	0	3	4	24	95	86	6.07479e-05
GRB2	4	24	1	6	94	83	6.09252e-05
CUL2	1	1	12	41	86	71	6.61412e-05
ATP11A	2	16	7	21	90	76	6.71566e-05
SH3BP4	0	2	1	17	98	94	6.85289e-05
HIPK3	0	5	2	17	97	91	7.62351e-05
NME1	3	22	1	4	95	87	7.82997e-05
MUM1	1	2	3	23	95	88	8.17072e-05
TMEM104	4	24	1	5	94	84	8.34927e-05
CD46	13	38	0	4	86	71	8.64097e-05
SFMBT2	0	3	13	39	86	71	0.000104526
BST2	2	6	0	13	97	94	0.000122109
SP110	0	1	1	17	98	95	0.000128462
DIS3L2	0	0	1	17	98	96	0.000130308
INPP5D	0	0	1	17	98	96	0.000130308
KCNAB2	5	6	0	15	94	92	0.000134367
CALCOCO2	2	18	1	6	96	89	0.000135479
SP140L	0	1	1	16	98	96	0.000144598
SP100	0	1	1	16	98	96	0.000144598
FBXO6	6	5	0	15	93	93	0.000146013
TBC1D16	5	25	1	5	93	83	0.00015275
SYDE1	2	4	0	14	97	95	0.000158507
ILVBL	2	4	0	14	97	95	0.000158507
BRD4	2	4	0	14	97	95	0.000158507
HDAC4	1	0	2	20	96	93	0.000161086
ASNA1	1	2	1	17	97	94	0.000161653
NACC1	1	2	1	17	97	94	0.000161653
ITM2B	1	9	5	21	93	83	0.000166652
CYTH1	5	24	1	6	93	83	0.000169077
EPSTI1	1	11	5	19	93	83	0.000170119
MIR621	1	11	5	19	93	83	0.000170119
MS4A4A	2	4	4	24	93	85	0.000172007
PRKACB	2	11	1	13	96	89	0.000175369
TRPM1	2	6	3	21	94	86	0.000177
TNFRSF1B	6	6	0	15	93	92	0.000178434
IL18BP	2	18	7	16	90	79	0.000197563
HEXDC	4	21	1	7	94	85	0.00020607
CD7	4	21	1	7	94	85	0.00020607
ARID4A	1	5	3	20	95	88	0.000217971
PHF21A	1	3	3	21	95	89	0.000226354
GSKIP	1	4	5	25	93	84	0.000232662
SMARCA4	1	2	1	16	97	95	0.000240191
C19orf38	1	2	1	16	97	95	0.000240191
CARM1	1	2	1	16	97	95	0.000240191
DOCK9	2	14	7	21	90	78	0.000265721
FARP1	2	14	7	21	90	78	0.000265721
RNF213	5	24	1	5	93	84	0.000275986
ITGB3	2	14	1	9	96	90	0.000301691
BAIAP2	5	23	1	6	93	84	0.000304488
SAMHD1	5	25	0	0	94	88	0.000315388
ITSN2	2	4	0	13	97	96	0.000317449
APIP	1	5	2	17	96	91	0.000335746
RAP1A	1	12	2	11	96	90	0.000345549
TPCN2	4	20	6	16	89	77	0.00035823
WIZ	1	4	1	15	97	94	0.000370776
CD6	2	4	5	25	92	84	0.00039569
SAE1	2	2	1	16	96	95	0.000396118
CD5	2	6	5	24	92	83	0.00040528
STX16	10	33	0	1	89	79	0.000407851
SH3GL1	3	1	2	18	94	94	0.000443409
CAMK2N1	5	4	0	13	94	96	0.000456097
LGMN	1	4	5	24	93	85	0.000472197
NAB2	0	5	0	8	99	100	0.000475615
PAAF1	4	19	7	18	88	76	0.000476806
APOBEC3G	6	23	1	7	92	83	0.000478679
FBXO3	1	6	3	18	95	89	0.000514998
KPNA2	5	22	1	6	93	85	0.000542772
MTCH2	1	2	3	20	95	91	0.000563768
SPI1	1	2	3	20	95	91	0.000563768
MS4A6A	2	4	4	22	93	87	0.00057393
EFTUD2	1	10	1	10	97	93	0.000579884
MRPL21	4	19	6	16	89	78	0.000590534
GDPD5	3	16	7	19	89	78	0.000604403
TECR	1	2	1	15	97	96	0.000624485
CS	0	4	0	9	99	100	0.000641865
AHCY	7	28	0	0	92	85	0.000678097
LONP1	2	1	2	18	95	94	0.000702694
CCDC8	2	2	1	15	96	96	0.000772087
OPA3	2	2	1	15	96	96	0.000772087
ZNF526	2	4	1	15	96	94	0.000775963
ARMC6	2	4	1	15	96	94	0.000775963
CBX7	6	23	1	6	92	84	0.000778691
BAHCC1	6	23	1	6	92	84	0.000778691
TMEM184B	6	24	1	5	92	84	0.000790037
CSNK1E	6	24	1	5	92	84	0.000790037
MKL1	6	26	2	3	91	84	0.000846032
EIF6	6	25	0	1	93	87	0.000850368
ULK1	0	4	1	12	98	97	0.000865093
FBRSL1	0	4	1	12	98	97	0.000865093
C14orf159	1	5	5	22	93	86	0.000874053
ERGIC2	1	10	0	6	98	97	0.000891859
PPP2R5C	1	3	6	25	92	85	0.000895283
TECPR2	1	3	6	25	92	85	0.000895283
GATAD2A	2	3	1	15	96	95	0.000922274
SYNGR1	6	22	1	7	92	84	0.000963701
APOBEC3F	6	22	1	7	92	84	0.000963701
SUZ12	1	8	3	15	95	90	0.000999639
RFFL	1	7	3	16	95	90	0.00104724
VAV1	1	2	2	17	96	94	0.00112724
KDM4B	1	1	2	17	96	95	0.00113476
HIVEP3	1	7	0	8	98	98	0.00125601
SLC3A2	1	3	8	28	90	82	0.00125611
MPEG1	2	6	4	20	93	87	0.00127177
BAIAP2L2	7	25	1	5	91	83	0.00130539
GSTP1	3	15	6	17	90	81	0.0013505
L3HYPDH	1	4	4	20	94	89	0.00142374
POLR3H	11	29	0	4	88	80	0.00148953
PQLC3	1	3	1	13	97	97	0.00151306
ITGB2	1	3	3	18	95	92	0.00151821
ACO2	11	30	0	3	88	80	0.00183303
SERPING1	1	7	4	17	94	89	0.00190285
TTLL12	10	26	0	5	89	82	0.00194034
RHOT1	1	7	3	15	95	91	0.00197282
PARP11	0	8	1	6	98	99	0.00200802
FUT8	1	3	4	20	94	90	0.00207103
SUSD6	1	3	4	20	94	90	0.00207103
FGFR1OP2	1	10	0	5	98	98	0.00209074
LIG1	1	2	2	16	96	95	0.00211374
ADRBK1	3	14	6	17	90	82	0.00224644
ERI3	1	7	0	7	98	99	0.00240833
GRWD1	1	3	2	15	96	95	0.00241518
TUBA1C	2	2	0	10	97	101	0.00253163
TROAP	2	2	0	10	97	101	0.00253163
PPM1H	0	3	0	8	99	102	0.00256239
POLR1A	1	4	0	9	98	100	0.002599
TMEM120B	0	4	1	10	98	99	0.00270779
PSMD9	0	4	1	10	98	99	0.00270779
MLXIP	0	4	1	10	98	99	0.00270779
HNRNPUL1	2	4	1	13	96	96	0.00271405
MYO1D	1	7	3	14	95	92	0.00282828
CGRRF1	1	5	3	16	95	92	0.00287027
NFAM1	11	29	0	3	88	81	0.00300137
EVL	2	3	6	24	91	86	0.00304796
CACNB3	2	3	0	10	97	100	0.00306058
YPEL5	2	3	0	10	97	100	0.00306058
ARHGDIB	0	9	1	3	98	101	0.00308726
CD8A	1	3	0	9	98	101	0.00308726
COPS2	2	5	3	17	94	91	0.00315967
GCH1	2	5	3	17	94	91	0.00315967
ZNFX1	11	31	0	0	88	82	0.00323395
RARRES3	1	3	9	28	89	82	0.00325596
BIN2	0	0	1	12	98	101	0.00331082
PTP4A2	2	9	1	10	96	94	0.00343748
SDC3	2	9	1	10	96	94	0.00343748
ATP5SL	2	5	1	12	96	96	0.00347469
PARVG	9	25	1	6	89	82	0.00348247
RHOD	3	13	6	17	90	83	0.00377505
C19orf47	3	4	1	13	95	96	0.00380112
JAG2	1	4	6	22	92	87	0.00381753
NCKAP5L	1	1	0	9	98	103	0.00383748
ZNF749	1	4	3	16	95	93	0.00398621
SGPP1	1	3	4	19	94	91	0.0040203
ZBTB1	1	3	4	19	94	91	0.0040203
SERPINE2	1	5	1	11	97	97	0.00424075
NIPAL3	4	6	0	10	95	97	0.00424929
ARHGAP9	1	5	0	8	98	100	0.00428886
CD40	9	27	0	1	90	85	0.00433421
ZSWIM1	9	27	0	1	90	85	0.00433421
NCOA5	9	27	0	1	90	85	0.00433421
GALK2	2	4	3	17	94	92	0.00498965
DUSP14	1	5	3	15	95	93	0.00499183
CDC42EP1	7	22	1	5	91	86	0.00501213
AP2A1	1	3	2	14	96	96	0.00517691
LAIR1	1	3	2	14	96	96	0.00517691
COX6A1	0	4	1	9	98	100	0.00523906
DOCK10	1	3	1	11	97	99	0.00548496
GTF3C2	1	3	1	11	97	99	0.00548496
DLST	1	3	5	20	93	90	0.00549407
PCNX	1	3	5	20	93	90	0.00549407
HCK	9	27	0	0	90	86	0.00549854
PARS2	2	9	0	6	97	98	0.00555848
MRPL37	2	9	0	6	97	98	0.00555848
PCED1B	2	4	1	12	96	97	0.00556825
PSMC6	2	5	3	16	94	92	0.00567683
FAM174B	5	18	0	3	94	92	0.00602709
NFKBIA	1	6	3	14	95	93	0.00615422
EIF2AK3	1	3	0	8	98	102	0.00628619
STAT5B	1	7	1	9	97	97	0.00631203
SLC25A39	2	9	1	9	96	95	0.00638294
UGP2	3	6	0	9	96	98	0.00659924
CCDC88B	1	4	10	27	88	82	0.00669466
RPS6KA4	1	4	10	27	88	82	0.00669466
FERMT3	1	4	10	27	88	82	0.00669466
LINC01317	2	3	0	9	97	101	0.00683785
MBP	0	4	4	14	95	95	0.00699498
SLC7A7	1	4	4	17	94	92	0.00722159
EPN1	1	4	4	17	94	92	0.00722159
TSPAN9	0	7	1	5	98	101	0.00727635
PLCB2	1	5	6	20	92	88	0.00742046
TUBB6	1	10	3	9	95	94	0.0075011
MICALL1	8	23	1	5	90	85	0.0077342
FMNL2	0	3	0	6	99	104	0.00774469
PRADC1	2	5	0	8	97	100	0.00774511
KLHDC2	2	4	3	16	94	93	0.00779117
GPBP1L1	2	7	0	7	97	99	0.00812611
GCN1L1	0	3	1	9	98	101	0.00830585
LPIN2	2	12	3	9	94	92	0.00857899
ITGAM	1	2	0	8	98	103	0.00942495
ITGAL	1	2	0	8	98	103	0.00942495
BCL7C	1	2	0	8	98	103	0.00942495
STX4	1	2	0	8	98	103	0.00942495
BACE2	1	3	3	15	95	95	0.00954657
ARHGAP25	2	4	0	8	97	101	0.00958439
ETAA1	2	4	0	8	97	101	0.00958439
C1D	2	4	0	8	97	101	0.00958439
VRK2	2	4	0	8	97	101	0.00958439
GMCL1	2	4	0	8	97	101	0.00958439
PTPN2	1	10	4	10	94	93	0.0098631
CYTH4	7	21	1	5	91	87	0.00996052
RAC2	7	21	1	5	91	87	0.00996052
PAK4	3	6	1	11	95	96	0.0100104
MAST2	3	8	0	7	96	98	0.0102202
AACS	1	4	1	10	97	99	0.0105907
STK4	10	27	0	0	89	86	0.0106278
PKIG	10	27	0	0	89	86	0.0106278
LYRM1	1	6	0	6	98	101	0.0111789
C15orf57	1	3	7	22	91	88	0.011442
EIF3K	3	5	1	11	95	97	0.0119228
CBLN3	1	4	4	16	94	93	0.0120056
NYNRIN	1	4	4	16	94	93	0.0120056
TEAD4	0	7	1	4	98	102	0.0125344
ETV6	0	7	1	4	98	102	0.0125344
MFSD5	0	0	2	12	97	101	0.012639
TEP1	1	3	4	17	94	93	0.0126496
LGALS2	8	22	1	5	90	86	0.0127422
CLIC4	4	6	0	8	95	99	0.0128905
RUNX3	4	6	0	8	95	99	0.0128905
APOL3	8	15	2	12	89	86	0.0131338
CCPG1	3	6	2	13	94	94	0.0137453
NCKAP1L	0	2	1	9	98	102	0.0139325
LYSMD2	3	4	3	16	93	93	0.0148177
PPP1R21	4	5	0	8	95	100	0.0150446
OAS1	0	4	1	7	98	102	0.0154445
TRAFD1	0	4	1	7	98	102	0.0154445
PWP1	0	3	1	8	98	102	0.0157479
ISCU	0	3	1	8	98	102	0.0157479
C3AR1	0	6	1	5	98	102	0.0161299
CLEC2D	0	6	1	5	98	102	0.0161299
SQRDL	1	3	5	18	93	92	0.016564
SORD	1	3	5	18	93	92	0.016564
CEP290	0	4	2	9	97	100	0.0172019
C2CD5	2	12	1	3	96	98	0.018321
IL2RB	8	20	1	6	90	87	0.0194927
SCFD1	1	4	4	15	94	94	0.0195203
DUSP2	1	0	0	6	98	107	0.0198864
FGR	3	8	1	9	95	96	0.0204774
STX12	3	8	1	9	95	96	0.0204774
MECR	3	8	1	9	95	96	0.0204774
TRIM69	1	3	6	19	92	91	0.0208931
SNAP23	1	3	6	19	92	91	0.0208931
B2M	1	3	6	19	92	91	0.0208931
CASC4	1	3	6	19	92	91	0.0208931
UBR1	1	3	6	19	92	91	0.0208931
SPG11	1	3	6	19	92	91	0.0208931
TTC7A	4	4	0	8	95	101	0.0218083
SOCS5	4	4	0	8	95	101	0.0218083
GPI	3	7	1	9	95	97	0.0232111
CCNE1	3	7	1	9	95	97	0.0232111
FAM214A	4	5	3	15	92	93	0.0232169
RITA1	0	3	1	7	98	103	0.0232179
UNC45A	5	16	0	2	94	95	0.0233462
HAPLN3	5	16	0	2	94	95	0.0233462
METTL4	3	12	3	9	93	92	0.0247694
UBXN4	1	3	0	6	98	104	0.0258207
APOLD1	0	6	1	3	98	104	0.0258207
PLEKHA5	1	9	1	3	97	101	0.0258382
MORC3	1	3	3	13	95	97	0.0266459
TRIM63	4	8	1	9	94	96	0.0285615
RNF144A	2	4	2	12	95	97	0.0288414
MGAT4A	2	1	0	6	97	106	0.0290763
VPS18	1	3	7	20	91	90	0.0306736
ACTR3	1	1	0	6	98	106	0.0310643
HPS4	6	15	3	10	90	88	0.0320241
TMEM147	3	6	1	9	95	98	0.0327489
PPP1R12A	1	4	1	8	97	101	0.0340174
ACTR6	0	3	2	9	97	101	0.034574
MGRN1	2	6	0	5	97	102	0.034849
UBALD1	2	6	0	5	97	102	0.034849
CDIP1	2	6	0	5	97	102	0.034849
UQCRFS1	3	8	1	8	95	97	0.035775
FAH	5	16	0	1	94	96	0.0366754
GTF3C1	1	2	0	6	98	105	0.037491
IMPA2	2	10	3	8	94	95	0.0381877
SAMD4B	3	6	2	11	94	96	0.0410028
AKAP13	5	16	1	1	93	96	0.0424376
PEPD	3	7	1	8	95	98	0.0453346
SCAF4	1	5	3	11	95	97	0.0493213
STK35	6	11	2	10	91	92	0.0500409
CST7	6	13	2	9	91	91	0.0506125
TXNDC11	2	7	0	4	97	102	0.0522052
EARS2	1	3	1	8	97	102	0.0522052
CEP89	3	6	1	8	95	99	0.0526028
TICRR	5	15	0	1	94	97	0.0580013
RBM43	2	3	0	6	97	104	0.0590092
NMI	2	3	0	6	97	104	0.0590092
SPOPL	2	3	0	6	97	104	0.0590092
IFNAR1	1	4	4	13	94	96	0.0597244
IFNAR2	1	4	4	13	94	96	0.0597244
AEN	5	16	1	2	93	95	0.0597832
ALG1	2	5	0	5	97	103	0.0655775
TMX4	6	13	2	8	91	92	0.0697247
SNX6	2	4	4	14	93	95	0.0711432
TANK	1	3	0	5	98	105	0.0716152
MRPS6	1	3	4	13	94	97	0.0734265
CECR1	6	11	1	7	92	95	0.0793077
KCTD18	0	2	1	6	98	105	0.0882248
C1RL	1	5	1	5	97	103	0.0961786
C1S	1	5	1	5	97	103	0.0961786
NFKBID	3	5	2	9	94	99	0.111647
CYTIP	2	3	0	5	97	105	0.120666
MAP3K2	1	1	0	4	98	108	0.124727
TOM1	9	14	2	8	88	91	0.139272
C20orf27	6	12	3	9	90	92	0.140466
WDR62	3	4	2	9	94	100	0.141243
CAPNS1	3	4	2	9	94	100	0.141243
CIB2	7	13	0	3	92	97	0.143502
CECR5	6	11	1	6	92	96	0.146727
FOXRED2	8	16	3	8	88	89	0.146738
MEF2A	6	14	1	4	92	95	0.147757
TMEM87B	1	1	1	6	97	106	0.151913
RAB40C	1	1	1	6	97	106	0.151913
PSMA4	6	13	0	2	93	98	0.159372
CCNF	2	4	0	4	97	105	0.16157
PLEKHA3	1	3	1	6	97	104	0.163083
GCA	1	3	0	4	98	106	0.17459
PTPN4	1	2	0	4	98	107	0.174823
INSIG2	1	2	0	4	98	107	0.174823
GYPC	1	2	0	4	98	107	0.174823
CFLAR	0	2	2	6	97	105	0.179103
CASP10	0	2	2	6	97	105	0.179103
MLST8	2	3	0	4	97	106	0.179243
SYNM	6	14	1	3	92	96	0.225266
NAB1	1	3	1	5	97	105	0.271201
SLC25A12	1	3	1	5	97	105	0.271201
TLK1	1	3	1	5	97	105	0.271201
ADPGK	5	11	0	1	94	101	0.297398
VPS13C	4	8	2	6	93	99	0.301013
PSTPIP1	7	12	0	2	92	99	0.346766
RPP25	6	10	0	2	93	101	0.358033
GCC2	1	1	1	5	97	107	0.378497
CASP8	0	2	3	6	96	105	0.391985
SNX1	4	6	2	6	93	101	0.421096
PMS1	1	3	2	5	96	105	0.501085
DENND4A	5	7	1	3	93	103	0.705539
PIAS1	6	8	0	1	93	104	0.887675
