# Supplementary material for: Epigenomic and genomic analysis of transcriptome modulation in skin cutaneous melanoma
Source: Aging (Albany NY). 2020 Jul 7;12(13):12703–25. doi: 10.18632/aging.103115 (PMC7377867; doi:10.18632/aging.103115)
Supplement: Supplementary Table 8 [file aging-12-103115-s007..xlsx]

## Sheet: S8_Table
Supplementary Table 8. Differential methylation (MET) genes between iC1 and iC3 subtypes.
ID	iC1_HyperMethy	iC3_HyperMethy	iC1_HypoMethy	iC3_HypoMethy	iC1_Normal	iC3_Normal	FisherP	gName
cg25607920	2	1	1	102	96	10	8.39906e-47	HIVEP3
cg26038582	1	1	2	95	96	17	3.58069e-39	HIVEP3
cg19400179	13	106	0	0	86	7	3.33411e-36	DZIP3
cg00422935	0	0	10	102	89	11	3.66147e-35	SEMA6A
cg09106999	0	0	6	97	93	16	4.04979e-35	PMEL
cg15937073	0	0	4	93	95	20	1.83497e-34	HIVEP3
cg20380468	5	94	0	0	94	19	8.62996e-34	FYB
cg23211791	0	0	5	94	94	19	8.62996e-34	SLC25A15
cg23762517	1	1	0	82	98	30	1.79688e-33	HIVEP3
cg06748147	0	0	2	87	97	26	5.54833e-33	CSNK1E
cg03884592	0	0	13	101	86	12	1.60515e-31	HIVEP3
cg25668416	0	0	18	105	81	8	5.59605e-31	FNDC3B
cg05877528	0	0	12	99	87	14	9.96648e-31	HPS4
cg17100943	2	0	4	87	93	26	3.84863e-30	SLC25A23
cg13829189	0	0	12	98	87	15	6.45852e-30	NSMF
cg11205006	0	0	12	98	87	15	6.45852e-30	HPS4
cg25390440	0	0	3	84	96	29	1.04701e-29	GYPC
cg09088496	2	81	0	1	97	31	1.36192e-29	SPATA13
cg17342247	0	0	24	108	75	5	2.87992e-29	CTNS
cg17452301	0	0	2	81	97	32	3.57409e-29	PWWP2B
cg10096929	0	0	3	83	96	30	4.3093e-29	GLMP
cg24085039	0	0	3	82	96	31	1.73751e-28	PWWP2B
cg19781870	0	0	1	77	98	36	2.01557e-28	CSNK1E
cg27468704	0	0	7	89	92	24	2.42949e-28	HPS4
cg14149172	0	0	10	93	89	20	4.1373e-28	PI4KB
cg16774946	1	75	0	1	98	37	8.38889e-28	SPATA13
cg10752753	0	0	6	86	93	27	1.96246e-27	SLC45A2
cg11366934	0	0	3	80	96	33	2.67718e-27	BRI3
cg26175729	0	1	0	71	99	41	2.74488e-27	ABCB8
cg17536532	0	0	21	103	78	10	6.23651e-27	PPP1R26
cg07543823	0	0	6	85	93	28	8.34913e-27	RTN4R
cg17105014	0	0	1	74	98	39	9.26344e-27	GYPC
cg01813139	0	0	2	77	97	36	9.43562e-27	AGPAT2
cg00536939	0	0	10	91	89	22	9.76711e-27	NR1H3
cg11102782	0	0	28	108	71	5	9.98959e-27	ISYNA1
cg13832290	4	81	0	0	95	32	1.05703e-26	SIT1
cg06524039	2	0	1	74	96	39	1.06796e-26	BRI3
cg03719083	0	0	27	107	72	6	1.74081e-26	TFAP2A
cg14564351	1	73	0	0	98	40	3.22206e-26	AHI1
cg08129583	0	0	2	76	97	37	3.72924e-26	GYPC
cg17001035	0	0	2	76	97	37	3.72924e-26	PCGF5
cg08515285	0	0	2	75	97	38	7.11851e-26	DGCR6L
cg12875241	1	0	9	88	89	25	1.4334e-25	GPR143
cg18411108	6	82	0	1	93	30	1.44416e-25	ATXN7
cg26922780	6	83	0	0	93	30	1.44416e-25	RNF166
cg02516101	0	0	4	79	95	34	1.47391e-25	CSNK1E
cg10590292	1	71	1	2	97	40	1.49344e-25	BIN2
cg20462883	0	0	16	96	83	17	3.24191e-25	BCL7A
cg02473606	0	0	4	78	95	35	5.36844e-25	MMP17
cg16238918	0	0	3	76	96	37	5.40413e-25	PARD6G
cg16932560	0	0	0	67	99	46	7.04544e-25	PRRC2A
cg07855639	0	0	2	73	97	40	8.21415e-25	CDC42EP1
cg24065807	10	87	0	1	89	25	9.52229e-25	TRAC
cg12659952	0	0	24	103	75	10	1.16637e-24	TFAP2A
cg06993714	0	0	22	101	77	12	1.34152e-24	NFATC4
cg17673897	5	79	0	0	94	34	1.76881e-24	TFAP2A
cg02225847	0	0	3	75	96	38	1.98585e-24	FAM65A
cg05514299	0	0	30	107	69	6	2.1862e-24	MGAT5B
cg03752628	0	0	0	66	99	47	2.20289e-24	PTGFRN
cg17904988	0	0	2	72	97	41	2.72596e-24	ADAMTS4
cg15626285	4	0	0	65	95	48	2.98397e-24	C1S
cg19252956	0	65	7	1	92	47	3.03944e-24	DOCK8
cg21203569	2	0	7	82	90	31	5.99088e-24	NR1H3
cg26449680	0	0	0	65	99	48	6.80157e-24	CSNK1E
cg02054431	0	0	0	65	99	48	6.80157e-24	PRRC2A
cg12894126	0	0	0	65	99	48	6.80157e-24	UCK1
cg05839875	1	68	4	0	94	45	7.20869e-24	FYB
cg00668150	0	0	1	68	98	45	1.39465e-23	CLUH
cg17078393	7	81	0	0	92	32	1.90235e-23	LCK
cg11896587	0	0	11	87	88	26	2.57681e-23	FBXO17
cg06517940	2	70	0	0	97	43	2.87979e-23	LCK
cg03016153	25	102	0	0	74	11	3.70965e-23	CD2
cg03297901	0	63	4	4	95	46	4.53324e-23	TMC6
cg23061725	1	67	0	0	98	46	4.58158e-23	CASP8
cg19084479	4	7	0	61	95	45	8.573e-23	POLD2
cg07424295	0	0	31	106	68	7	9.35046e-23	PCGF5
cg00549475	0	2	5	74	94	37	1.37672e-22	TMEM220
cg01667702	0	0	10	84	89	29	1.41322e-22	CNTROB
cg15583058	0	0	24	100	75	13	1.56398e-22	PMPCA
cg00766289	19	92	0	3	80	18	2.81428e-22	TSPAN9
cg26741350	0	0	2	68	97	45	2.89749e-22	CEP89
cg06497051	0	0	1	65	98	48	4.85158e-22	GLMP
cg13500819	1	65	0	0	98	48	4.85158e-22	MZB1
cg21431832	0	0	26	101	73	12	4.95759e-22	HPS4
cg27269488	0	0	0	61	99	52	5.53007e-22	CCDC50
cg14855367	0	0	0	61	99	52	5.53007e-22	CCDC50
cg19917083	0	0	42	111	57	2	6.17576e-22	TMEM87B
cg01966878	0	1	0	60	99	52	6.79433e-22	SNCA
cg21826978	11	84	0	0	88	29	9.10752e-22	PSMB9
cg09498078	0	0	19	94	80	19	9.45495e-22	MYO10
cg17213699	0	60	4	3	95	50	1.45569e-21	LAG3
cg10673833	0	60	1	1	98	52	1.62114e-21	MYO1G
cg08690459	0	0	8	79	91	34	1.87007e-21	NR1H3
cg15059065	6	3	1	64	92	46	2.10757e-21	NR2F6
cg08843314	6	74	0	1	93	38	3.02697e-21	CXCR3
cg18384097	1	63	2	2	96	48	3.36127e-21	PTPN7
cg11063729	0	0	9	80	90	33	3.47891e-21	TFAP2A
cg18675610	0	0	27	101	72	12	3.67168e-21	ARHGAP12
cg04196298	0	0	18	92	81	21	3.99134e-21	SLC43A2
cg13816999	0	0	21	95	78	18	4.31228e-21	PARVA
cg21868063	0	0	0	59	99	54	4.71418e-21	MGAT5B
cg13060704	0	0	0	59	99	54	4.71418e-21	TRIM27
cg13703437	0	0	1	63	98	50	5.01318e-21	FYB
cg13821008	1	63	13	5	85	45	6.64827e-21	WIPF1
cg06398251	0	0	2	65	97	48	8.57963e-21	EIF4G1
cg14705695	0	0	2	65	97	48	8.57963e-21	TYR
cg17654470	0	0	5	72	94	41	8.96695e-21	RTN4R
cg15133208	0	0	9	79	90	34	1.20928e-20	SNCA
cg06554535	0	0	4	69	95	44	1.79285e-20	PARVA
cg05677133	22	95	0	0	77	18	1.85095e-20	EIF4G1
cg09336260	6	71	0	2	93	40	2.81337e-20	GPR34
cg14058476	1	0	1	61	97	52	2.93475e-20	NFATC4
cg27454412	0	0	9	78	90	35	4.14402e-20	C7orf50
cg14556909	0	57	3	2	96	54	4.72044e-20	BIN2
cg08075204	0	57	5	2	94	54	4.99829e-20	BIN2
cg19725489	0	0	41	109	58	4	5.044e-20	FCHO2
cg00803638	0	0	4	68	95	45	5.33352e-20	TEAD3
cg05693982	0	0	5	70	94	43	9.21498e-20	APOLD1
cg03776194	0	56	0	0	99	57	1.11243e-19	RNF166
cg26656022	0	0	52	113	47	0	1.32577e-19	PSEN2
cg16685388	0	1	37	105	62	7	1.55939e-19	HIVEP3
cg20481655	1	59	0	0	98	54	1.69511e-19	TRAC
cg18114036	2	0	0	55	97	58	2.05114e-19	GLMP
cg24612198	14	84	0	0	85	29	2.23746e-19	CD3E
cg12377256	19	0	0	46	80	67	2.28231e-19	PMEL
cg07185983	1	0	5	69	93	44	2.91026e-19	NHSL1
cg13553498	20	91	0	0	79	22	3.02562e-19	CLEC2D
cg17918184	52	3	0	12	47	98	3.07226e-19	RNF144A
cg21711214	0	0	0	55	99	58	3.15399e-19	HPS4
cg24768595	43	3	0	31	56	79	3.43874e-19	CYTH1
cg02794784	2	59	0	3	97	51	3.58006e-19	SYNM
cg02406092	0	0	8	74	91	39	4.14608e-19	SAMD4B
cg04604656	0	2	11	77	88	34	5.38737e-19	MUM1
cg16548605	30	0	0	32	69	81	9.90368e-19	SLC19A2
cg04671742	1	57	0	0	98	56	1.28907e-18	LAG3
cg17831440	7	2	1	57	91	54	1.41889e-18	MCF2L
cg22060735	7	1	1	56	91	56	1.85464e-18	SRD5A3
cg07298473	0	0	2	60	97	53	2.08001e-18	NR1H3
cg03014241	2	59	0	1	97	53	2.08001e-18	SOCS1
cg14027204	2	59	0	1	97	53	2.08001e-18	PTGFRN
cg27100370	26	7	0	51	73	55	2.14523e-18	HMHA1
cg21910709	0	0	24	94	75	19	2.20759e-18	TRIP13
cg16759783	0	1	0	52	99	60	2.49888e-18	TXNL4A
cg15518883	0	53	0	0	99	60	2.49888e-18	SIT1
cg25523477	5	67	0	0	94	46	2.81708e-18	BAHCC1
cg16039157	17	86	3	1	79	26	2.84561e-18	B2M
cg16269733	3	62	1	0	95	51	2.86348e-18	BCAN
cg05757530	1	56	0	0	98	57	3.50659e-18	NLRC5
cg07217954	0	0	15	83	84	30	3.56626e-18	C7orf50
cg23735003	8	72	0	0	91	41	3.71668e-18	IL2RG
cg16167809	11	77	0	0	88	36	4.23169e-18	LST1
cg16509569	0	51	4	0	95	62	4.25248e-18	NCKAP1L
cg24869601	0	0	45	109	54	4	4.62773e-18	TFAP2A
cg11661187	42	1	0	16	57	96	4.83459e-18	SNCA
cg17084151	0	0	26	95	73	18	6.23529e-18	NCALD
cg24898914	5	65	1	2	93	46	6.5107e-18	PSMB8
cg07761358	3	0	2	58	94	55	6.92051e-18	ABCD1
cg01810863	0	0	0	52	99	61	6.98693e-18	PMEL
cg06636541	0	0	18	86	81	27	7.29087e-18	BAHCC1
cg17295878	4	0	0	50	95	63	7.30985e-18	TBC1D16
cg02417408	1	54	1	3	97	56	7.63961e-18	PPM1M
cg02452732	0	0	3	61	96	52	8.14836e-18	IFI35
cg05097643	1	3	8	70	90	40	9.01727e-18	PKMYT1
cg16226962	0	0	1	55	98	58	9.45921e-18	TFAP2A
cg05564831	0	0	1	55	98	58	9.45921e-18	NT5DC2
cg07635227	0	49	1	4	98	60	9.89146e-18	MGRN1
cg26427109	0	46	27	5	72	62	1.21481e-17	CD6
cg26757673	20	88	0	0	79	25	1.68743e-17	IL2RB
cg00252594	79	25	0	0	20	88	1.68743e-17	ANKRD9
cg01568784	0	0	28	96	71	17	1.76676e-17	RAB38
cg20281309	0	0	44	108	55	5	1.77988e-17	GAB2
cg23351738	1	0	0	51	98	62	1.94519e-17	PRRC2A
cg15296767	0	0	0	51	99	62	1.94519e-17	CCDC88B
cg25885803	0	0	12	77	87	36	2.12605e-17	NR1H3
cg19900558	6	0	1	52	92	61	2.68043e-17	ABCD1
cg03382797	11	74	0	1	88	38	4.07316e-17	C9orf9
cg05200628	0	48	11	2	88	63	4.42967e-17	CD48
cg24654874	0	0	0	50	99	63	5.39208e-17	C2
cg21376733	0	50	3	1	96	62	6.2025e-17	NCKAP1L
cg09586191	21	88	0	0	78	25	6.20418e-17	TNFRSF4
cg19811118	0	0	3	59	96	54	6.44509e-17	PKIG
cg13073302	0	0	3	59	96	54	6.44509e-17	FAM57A
cg02934347	0	0	39	104	60	9	7.83525e-17	CAP2
cg27284288	1	52	3	0	95	61	1.00781e-16	CD6
cg20570016	0	0	1	52	98	61	1.77504e-16	GLMP
cg21003380	0	0	1	52	98	61	1.77504e-16	GLMP
cg12779301	0	0	1	52	98	61	1.77504e-16	BAIAP2
cg15719903	0	48	0	0	99	65	1.9226e-16	TAPBPL
cg17792192	81	33	0	26	18	54	1.94757e-16	CAMSAP1
cg25363789	0	0	30	96	69	17	1.98631e-16	CAPN1
cg25408008	0	1	0	47	99	65	2.01278e-16	MIER1
cg16329842	25	1	0	34	74	78	2.16767e-16	MAD1L1
cg03655684	21	87	0	0	78	26	2.19151e-16	CLCN7
cg08118942	48	3	0	3	51	107	2.28293e-16	AACS
cg02025583	0	1	1	51	98	61	2.42738e-16	TMEM220
cg12624792	0	0	56	112	43	1	3.52189e-16	CSNK1E
cg17697633	3	57	5	1	91	55	3.53308e-16	TFAP2A
cg05702218	11	72	0	1	88	40	3.70659e-16	RABGAP1L
cg19179572	15	79	0	0	84	34	4.23737e-16	HEXDC
cg20001791	4	1	1	51	94	61	4.28369e-16	GMPR
cg02799880	6	0	0	45	93	68	4.41638e-16	DOCK9
cg10768391	0	1	44	105	55	7	4.70079e-16	GMPR
cg10296205	5	2	1	51	93	60	4.75989e-16	SYTL3
cg24674703	0	47	0	0	99	66	4.83068e-16	CD5
cg25303150	0	0	0	47	99	66	4.83068e-16	PWWP2B
cg21074190	31	0	0	19	68	94	4.85226e-16	PMEL
cg24646009	0	0	9	69	90	44	5.06442e-16	BCAP29
cg08149682	0	1	0	46	99	66	5.10036e-16	MUM1
cg14422759	86	37	0	3	13	73	5.68739e-16	RTN4R
cg08787083	59	10	0	5	40	98	5.69877e-16	PTPRE
cg24459792	0	47	4	1	95	65	5.97992e-16	LAPTM5
cg15201909	0	45	4	0	95	68	6.0002e-16	IL2RG
cg17598574	41	104	0	0	58	9	6.7853e-16	RAP1A
cg11566244	0	0	23	88	76	25	7.72535e-16	GSTP1
cg16190688	35	2	0	24	64	87	7.89062e-16	PMEL
cg16415058	0	0	26	91	73	22	7.9038e-16	SORCS1
cg19872463	0	47	5	3	94	63	8.71373e-16	LAG3
cg11654517	1	1	7	65	91	47	9.779e-16	ARHGEF6
cg01532010	0	0	2	53	97	60	1.08076e-15	ZNF71
cg13368983	0	46	0	0	99	67	1.204e-15	CFLAR
cg06791592	2	53	6	2	91	58	1.31283e-15	PSMB9
cg20914725	0	0	3	56	96	57	1.35458e-15	DOK1
cg18113826	3	56	0	0	96	57	1.35458e-15	AIF1
cg26340740	9	68	0	0	90	45	1.38966e-15	MPEG1
cg26326208	1	47	0	3	98	63	1.50066e-15	PTPRE
cg03015672	10	4	0	46	89	63	1.72221e-15	ARHGAP12
cg06761850	0	1	1	49	98	63	1.77481e-15	TECPR2
cg14947634	40	2	0	14	59	97	1.83809e-15	ABCC2
cg08022502	0	0	38	101	61	12	1.92478e-15	UNC45A
cg25823710	57	9	0	0	42	104	1.9594e-15	PRRC2A
cg20566897	0	46	3	2	96	65	2.02054e-15	IFITM1
cg18091964	0	43	1	5	98	65	2.46813e-15	SASH3
cg20067780	5	0	0	43	94	70	2.49223e-15	TBC1D16
cg27087377	0	0	53	110	46	3	2.54138e-15	HPS4
cg04956254	25	89	0	0	74	24	2.64488e-15	DUSP14
cg02647042	0	0	2	52	97	61	2.75012e-15	ARHGEF6
cg27410601	0	43	3	8	96	62	2.88779e-15	TMC6
cg15473904	0	0	30	94	69	19	2.91455e-15	MRPL41
cg17467898	1	0	0	45	98	68	2.9777e-15	NUDT1
cg07319712	0	0	0	45	99	68	2.9777e-15	HMHA1
cg22437221	0	45	0	0	99	68	2.9777e-15	FYB
cg08422803	0	45	0	0	99	68	2.9777e-15	ITGB2
cg26719625	0	0	1	49	98	64	3.14264e-15	TRPV2
cg01797899	1	49	0	0	98	64	3.14264e-15	TRAC
cg09448875	27	0	0	22	72	91	3.60638e-15	ABCC2
cg13951491	0	0	9	67	90	46	3.76648e-15	HPDL
cg10167235	0	0	6	61	93	52	4.46504e-15	WARS
cg23889684	0	2	79	30	20	81	4.96187e-15	APOL3
cg21593554	40	101	0	1	59	11	5.07335e-15	PSMB8
cg26363363	0	45	5	3	94	65	5.30366e-15	PTPN6
cg16425038	0	45	3	2	96	66	5.33015e-15	REC8
cg06864789	0	0	35	98	64	15	6.24667e-15	NHSL1
cg19421125	0	42	1	5	98	66	6.43786e-15	LAG3
cg05134019	75	26	0	5	24	82	7.80071e-15	PSEN2
cg26799474	2	52	15	9	82	52	8.66808e-15	CASP8
cg10704263	0	43	5	1	94	69	1.01433e-14	CYTH1
cg13002809	5	58	0	0	94	55	1.13631e-14	RBPJ
cg25095994	0	0	93	53	6	60	1.14561e-14	SP140L
cg04284140	4	5	0	43	95	65	1.44387e-14	POLD2
cg14750551	28	90	0	1	71	22	1.48972e-14	PARP14
cg27008565	15	75	0	0	84	38	1.49429e-14	NCALD
cg06663615	12	0	0	37	87	76	1.70487e-14	BAHCC1
cg13224213	0	0	2	50	97	63	1.73922e-14	NOS3
cg01195833	87	42	0	2	12	69	1.76529e-14	NFATC4
cg19553910	0	0	0	43	99	70	1.78192e-14	NUB1
cg22224704	0	0	0	43	99	70	1.78192e-14	GSTP1
cg05564251	0	43	0	0	99	70	1.78192e-14	SP110
cg06132620	0	43	0	0	99	70	1.78192e-14	NHSL1
cg03271093	45	6	0	17	54	90	1.84349e-14	NHSL1
cg20284999	34	96	0	0	65	17	1.89348e-14	MS4A6A
cg19736900	0	42	0	1	99	70	1.97225e-14	PLEKHO1
cg22202088	1	47	0	0	98	66	2.07561e-14	CD5
cg26585416	30	1	0	20	69	92	2.13116e-14	DAPK3
cg13735469	2	50	1	1	96	62	2.26513e-14	FAM83H
cg01574233	15	0	0	33	84	80	2.63402e-14	PMEL
cg07350262	26	88	0	0	73	25	2.75536e-14	AKAP13
cg18673409	0	0	4	55	95	58	2.80535e-14	UBE2O
cg25132230	0	43	16	17	83	53	2.88443e-14	PTPRC
cg27530239	0	0	48	106	51	7	3.23996e-14	CALCOCO2
cg05590196	0	6	16	70	83	37	3.38624e-14	KIAA1522
cg13781574	4	55	5	5	90	53	3.65892e-14	DLG3
cg18749563	27	1	0	23	72	89	3.79622e-14	TBC1D16
cg01462546	27	1	0	23	72	89	3.79622e-14	MED15
cg03724964	1	3	0	41	98	69	4.23195e-14	FBXO17
cg08469215	0	0	0	42	99	71	4.31454e-14	GLMP
cg14276125	0	42	0	0	99	71	4.31454e-14	ADRBK1
cg11521563	0	0	0	42	99	71	4.31454e-14	MCF2L
cg17319795	0	42	0	0	99	71	4.31454e-14	LGMN
cg07884764	0	42	1	0	98	71	4.31454e-14	CCDC88B
cg11055493	0	31	29	4	70	78	4.48582e-14	HHEX
cg02301528	0	1	0	41	99	71	4.8499e-14	APOLD1
cg16593917	0	1	0	41	99	71	4.8499e-14	HPDL
cg21686213	1	45	0	1	98	67	5.29184e-14	IFITM1
cg05356800	35	96	0	0	64	17	5.58749e-14	CXCR3
cg00326464	0	0	52	108	47	5	6.78408e-14	TFAP2A
cg12406027	0	0	52	108	47	5	6.78408e-14	PAK4
cg26979504	0	5	42	3	57	105	7.5263e-14	HHEX
cg00504599	17	76	0	0	82	37	7.95435e-14	BAHCC1
cg03752885	29	0	0	12	70	101	8.11879e-14	DAPK3
cg01798157	1	46	8	5	90	62	8.16007e-14	BTG2
cg13673094	1	46	13	11	85	56	9.75772e-14	PTPRC
cg27354586	1	42	0	4	98	67	1.03182e-13	CD3E
cg03920729	0	0	0	41	99	72	1.03803e-13	NECAP2
cg07235805	0	0	0	41	99	72	1.03803e-13	PARD6G
cg22184944	1	0	0	41	98	72	1.03803e-13	BAIAP2
cg00645755	2	48	0	0	97	65	1.06847e-13	INTS1
cg17209284	61	15	0	4	38	94	1.1286e-13	SP140L
cg06853339	2	48	2	1	95	64	1.20214e-13	TMC6
cg26842802	0	35	10	0	89	78	1.43123e-13	CASP8
cg15611336	0	2	21	79	78	32	1.44016e-13	RPP25
cg02482603	2	47	0	1	97	65	1.44328e-13	RABGAP1L
cg22062539	57	110	0	0	42	3	1.54015e-13	PTDSS1
cg22840852	0	0	59	111	40	2	1.5557e-13	LGMN
cg20270188	0	0	59	111	40	2	1.5557e-13	BCAN
cg13144588	0	0	48	105	51	8	1.73837e-13	DAPK3
cg01821993	58	13	0	3	41	97	1.75429e-13	POLR2A
cg07950002	0	5	23	78	76	30	1.80035e-13	PKN3
cg25941151	0	0	4	53	95	60	1.86616e-13	TYR
cg06249486	0	0	37	97	62	16	1.98638e-13	BBS2
cg06315208	7	54	0	6	92	53	1.99067e-13	MDC1
cg23068939	2	47	5	1	92	65	1.99142e-13	C1orf162
cg00166343	0	40	11	4	88	69	2.08091e-13	CRLF3
cg20306694	0	40	0	0	99	73	2.48237e-13	BIN2
cg17108629	0	0	0	40	99	73	2.48237e-13	RAB38
cg10703453	0	0	0	40	99	73	2.48237e-13	PRRC2A
cg07380416	0	40	1	0	98	73	2.48237e-13	CD6
cg08456334	9	1	0	37	90	75	2.55002e-13	PI4KB
cg16385335	0	0	2	47	97	66	2.62169e-13	IL18BP
cg07121795	0	0	33	93	66	20	2.67251e-13	NECAP2
cg12571928	0	0	40	99	59	14	2.753e-13	BOK
cg16118839	5	54	0	1	94	58	2.86825e-13	CTSC
cg00512404	14	71	7	2	78	40	3.03909e-13	ARHGDIB
cg01837574	0	0	1	44	98	69	3.38523e-13	CNTROB
cg14719129	48	7	0	5	51	101	3.62029e-13	LARP7
cg01679043	0	0	13	69	86	44	3.90435e-13	SYNE1
cg18025430	9	62	0	0	90	51	4.63457e-13	MS4A4A
cg24841244	4	52	0	0	95	61	4.75358e-13	CD3D
cg00239353	4	51	0	1	95	61	4.75358e-13	IL32
cg22006825	0	0	38	97	61	16	5.3716e-13	HNRNPUL1
cg15585843	85	43	0	0	14	70	5.44785e-13	PA2G4
cg17813891	2	44	1	5	96	64	5.68865e-13	EVL
cg05251000	0	0	46	103	53	10	5.74937e-13	NCS1
cg17372758	3	6	0	38	96	69	5.81715e-13	ANAPC16
cg13506158	0	0	0	39	99	74	5.90271e-13	CCDC50
cg05524354	0	6	0	34	99	73	6.07607e-13	PTPRE
cg20819617	0	0	2	46	97	67	6.39168e-13	PTK7
cg27316956	0	7	0	33	99	73	6.48162e-13	SYNE1
cg07611666	52	11	0	10	47	92	6.8828e-13	MBP
cg13298147	1	42	5	8	93	63	6.99453e-13	TFAP2A
cg06624991	88	48	0	1	11	64	7.28476e-13	TPCN2
cg19008720	0	25	37	7	62	81	7.3721e-13	HMHA1
cg12140851	3	44	1	8	95	61	7.44122e-13	SKAP2
cg25399239	0	0	34	93	65	20	7.51332e-13	NHSL1
cg17044311	60	16	0	6	39	91	8.23959e-13	ABCC2
cg19723734	0	0	3	48	96	65	1.03194e-12	MAD1L1
cg24575275	0	0	1	42	98	71	1.06593e-12	C7orf50
cg22490695	1	42	0	0	98	71	1.06593e-12	ITGAM
cg18558647	2	45	16	19	81	49	1.15635e-12	FAM174B
cg02613937	0	0	51	106	48	7	1.20049e-12	TOMM40
cg23979832	3	0	0	37	96	76	1.20179e-12	BAIAP2
cg19190163	1	42	1	2	97	69	1.21705e-12	PSMB8
cg06293983	0	39	11	7	88	67	1.23919e-12	ARHGEF6
cg15396367	0	0	64	112	35	1	1.27057e-12	UAP1L1
cg12274524	3	47	0	1	96	65	1.28181e-12	PIM2
cg01854776	30	2	0	18	69	93	1.29338e-12	SH3BP4
cg27583010	0	31	0	8	99	74	1.33255e-12	CORO1A
cg09383860	0	38	0	0	99	75	1.39609e-12	IL18BP
cg23001650	0	0	0	38	99	75	1.39609e-12	B4GALT2
cg18395636	0	0	0	38	99	75	1.39609e-12	RAB38
cg13110239	0	0	0	38	99	75	1.39609e-12	CSNK1E
cg05405872	1	0	0	38	98	75	1.39609e-12	C11orf58
cg13461622	0	19	8	39	91	55	1.56332e-12	RUNX3
cg24749672	1	42	2	1	96	70	1.64715e-12	BIN2
cg11389756	18	0	1	28	80	85	1.65184e-12	TRIM27
cg08665930	0	37	0	1	99	75	1.6953e-12	APOBEC3D
cg23097296	0	1	0	37	99	75	1.6953e-12	KIAA1522
cg20107668	0	1	0	37	99	75	1.6953e-12	MCF2L
cg16186435	0	38	3	2	96	73	1.72763e-12	PSMB8
cg15502231	21	0	0	19	78	94	1.82923e-12	BCAP29
cg15224291	25	1	0	19	74	93	1.82962e-12	MBP
cg21712331	7	0	0	34	92	79	1.83808e-12	DOCK9
cg27518324	8	0	0	33	91	80	1.84485e-12	DOCK9
cg18587557	0	0	38	96	61	17	1.95729e-12	SLFN12
cg20705321	0	37	2	4	97	72	1.98474e-12	C19orf38
cg14074878	40	8	0	21	59	84	2.13199e-12	MCF2L
cg08893833	0	0	22	79	77	34	2.4559e-12	STX4
cg24128093	89	51	0	2	10	60	2.45753e-12	MUM1
cg27542341	81	39	0	2	18	72	3.15187e-12	RPP25
cg00200876	75	32	0	0	24	81	3.2366e-12	CDH3
cg17599748	0	0	0	37	99	76	3.28548e-12	PRRC2A
cg14683017	0	37	0	0	99	76	3.28548e-12	TFAP2A
cg06716730	1	0	0	37	98	76	3.28548e-12	DUSP14
cg23225508	1	1	0	37	98	75	3.28548e-12	DDX5
cg07507251	0	0	11	63	88	50	3.29364e-12	NT5DC2
cg14059339	55	13	1	8	43	92	3.39576e-12	TRIM27
cg11325578	0	0	17	72	82	41	3.55315e-12	GPR143
cg03565868	14	68	0	0	85	45	3.63261e-12	SPI1
cg02347652	51	10	0	0	48	103	3.87993e-12	PSMD9
cg25720264	4	1	0	36	95	76	3.99549e-12	PLEKHA5
cg03272225	0	36	0	1	99	76	4.08151e-12	JAK3
cg23753807	12	0	0	28	87	85	4.1568e-12	ABR
cg26255314	0	37	6	3	93	73	4.55842e-12	CD5
cg14537183	62	19	0	0	37	94	4.79912e-12	TPRN
cg02713162	11	2	0	34	88	77	4.87356e-12	SPRY4
cg06548292	13	0	0	27	86	86	4.89065e-12	MBP
cg15332386	9	0	0	31	90	82	5.2436e-12	SYNE1
cg00689225	0	36	5	8	94	69	5.31934e-12	NFKBIA
cg00876127	0	1	2	43	97	69	5.62425e-12	BBS2
cg17143179	1	40	6	8	92	65	6.23942e-12	PRDM1
cg02358862	0	35	6	1	93	77	6.4345e-12	CORO1A
cg20695297	0	35	1	4	98	74	6.48358e-12	S1PR4
cg07091412	0	37	6	5	93	71	6.84911e-12	CAMK2N1
cg09093656	0	0	5	51	94	62	6.92701e-12	TRPV2
cg25739875	0	35	5	1	94	77	6.95185e-12	TFAP2A
cg11778001	0	2	13	64	86	47	6.98798e-12	NAB1
cg01156249	12	63	0	1	87	49	7.02519e-12	MGRN1
cg14181576	12	63	0	1	87	49	7.02519e-12	FGR
cg06656651	18	1	0	25	81	87	7.55048e-12	GPR143
cg10512951	7	54	0	1	92	58	7.63011e-12	LMBRD1
cg01025720	59	17	0	5	40	91	7.68809e-12	ATP11A
cg07234388	0	0	0	36	99	77	7.69556e-12	GLMP
cg18457731	1	0	0	36	98	77	7.69556e-12	COL22A1
cg23754392	0	0	4	48	95	65	7.82751e-12	BMI1
cg13536265	0	0	2	43	97	70	8.92505e-12	NFATC4
cg08279189	69	27	0	8	30	78	9.42205e-12	TRIM27
cg08869883	90	55	0	0	9	58	9.75868e-12	PMEL
cg17396707	33	3	0	13	66	97	1.04205e-11	LIG1
cg16403932	37	5	0	14	62	94	1.05775e-11	ARHGAP9
cg26273005	82	42	0	7	17	64	1.10001e-11	WDR81
cg05018638	10	0	0	29	89	84	1.19941e-11	SLC45A2
cg02388150	0	5	6	48	93	60	1.21927e-11	SFRP1
cg11579421	0	0	1	39	98	74	1.31112e-11	PWWP2B
cg02621376	2	42	4	1	93	70	1.40624e-11	MCOLN2
cg08058160	20	1	0	22	79	90	1.41849e-11	RNF144A
cg21811911	27	5	0	26	72	82	1.42108e-11	TBC1D16
cg20117742	0	6	12	57	87	50	1.48272e-11	LAIR1
cg03330490	0	31	10	1	89	81	1.49675e-11	HHEX
cg18136963	2	0	42	98	55	15	1.51282e-11	NHSL1
cg11306767	0	34	0	2	99	77	1.52503e-11	GLRX
cg02185052	0	29	16	2	83	82	1.59835e-11	HHEX
cg05296777	83	44	0	1	16	68	1.6364e-11	SPOCK2
cg00992207	72	30	0	0	27	83	1.70327e-11	SNRNP25
cg19826026	0	30	30	9	69	74	1.72433e-11	ARHGDIB
cg21163717	0	35	0	0	99	78	1.79459e-11	DOK2
cg03314604	0	0	0	35	99	78	1.79459e-11	CDC42EP1
cg06099465	29	0	0	1	70	112	1.99329e-11	WDR81
cg14298244	25	1	0	15	74	97	2.13835e-11	MBP
cg22128918	39	4	0	0	60	109	2.14077e-11	C2
cg07417284	0	0	67	112	32	1	2.29023e-11	ABR
cg02705163	0	2	2	40	97	71	2.31574e-11	NHSL1
cg27285720	0	20	55	20	44	73	2.4357e-11	GBP4
cg25661358	74	33	0	0	25	80	2.44431e-11	PRRC2A
cg23894854	4	44	7	0	88	69	2.58686e-11	C1orf162
cg10947611	1	2	4	46	94	65	2.94514e-11	HDAC4
cg00971309	15	67	0	0	84	46	3.02731e-11	PSMB8
cg01461199	0	10	85	48	14	55	3.03535e-11	SNTB1
cg02628202	0	0	62	110	37	3	3.16716e-11	LGMN
cg07162820	0	1	20	73	79	39	3.23739e-11	NFATC4
cg21095280	1	37	0	1	98	75	3.34744e-11	CPNE5
cg01511465	71	30	0	6	28	77	3.65104e-11	MC1R
cg15450139	0	26	18	2	81	85	3.65217e-11	ARHGDIB
cg13221458	0	0	49	102	50	11	4.06081e-11	SOD2
cg06630455	0	0	49	102	50	11	4.06081e-11	TFAP2A
cg12031863	0	0	0	34	99	79	4.1676e-11	CDIP1
cg02826233	0	0	0	34	99	79	4.1676e-11	PMEL
cg27366007	0	0	0	34	99	79	4.1676e-11	UNC45A
cg00533183	0	34	3	2	96	77	4.33185e-11	PSMB8
cg27022584	0	0	26	81	73	32	4.56598e-11	BAIAP2
cg10223989	33	12	0	30	66	71	4.57748e-11	MCF2L
cg13448978	13	63	0	0	86	50	4.62891e-11	FGR
cg03888064	11	0	0	26	88	87	4.70176e-11	CCT3
cg27236490	8	52	0	3	91	58	4.7197e-11	MPEG1
cg04318619	24	0	0	8	75	105	4.84626e-11	ABR
cg11763337	2	41	0	0	97	72	5.01964e-11	TMEM104
cg14016344	4	45	0	1	95	67	5.03127e-11	CD72
cg03936031	9	56	0	0	90	57	5.12346e-11	PPP1R26
cg19589060	0	33	0	1	99	79	5.5753e-11	HK3
cg08869700	0	33	0	1	99	79	5.5753e-11	RFX5
cg16122370	0	1	0	33	99	79	5.5753e-11	MCF2L
cg20135243	0	32	15	5	84	76	5.60395e-11	PTK2B
cg11224765	0	2	8	53	91	58	5.61339e-11	ODF3B
cg07264666	0	29	1	8	98	76	5.64634e-11	NFAM1
cg10880928	19	70	0	2	80	41	6.20549e-11	RABL6
cg16393012	0	24	48	18	51	71	6.20796e-11	ARHGDIB
cg10645377	30	4	0	18	69	91	6.57642e-11	ATP6AP1
cg06871560	1	2	0	33	98	78	6.60574e-11	FAM214A
cg22239325	16	3	0	29	83	81	6.61761e-11	MBP
cg11744966	89	55	0	0	10	58	6.80949e-11	BAIAP2L2
cg17099048	0	0	3	43	96	70	7.17775e-11	COL22A1
cg08135379	0	22	30	6	69	85	8.46091e-11	PCED1B
cg12795893	0	0	19	71	80	42	8.70153e-11	ATP5B
cg03055440	53	104	0	0	46	9	9.1245e-11	MS4A6A
cg16795830	0	33	4	5	95	75	9.15361e-11	LST1
cg02473123	4	45	0	0	95	68	9.28123e-11	CD7
cg24685778	12	0	0	24	87	89	9.63094e-11	TRIM63
cg13477101	0	0	0	33	99	80	9.64057e-11	C7orf50
cg03837680	0	0	0	33	99	80	9.64057e-11	TBC1D16
cg27125093	0	33	0	0	99	80	9.64057e-11	S1PR4
cg10132694	0	12	1	26	98	75	9.68267e-11	LAIR1
cg04369100	87	52	0	1	12	60	9.92846e-11	HEXDC
cg08379738	52	13	0	2	47	98	1.02927e-10	DENND1C
cg03737080	0	0	56	106	43	7	1.07326e-10	FLAD1
cg03241909	32	2	0	4	67	107	1.13132e-10	CAPN1
cg05714732	10	55	0	3	89	55	1.13932e-10	PTP4A2
cg10526431	90	58	0	0	9	55	1.15499e-10	PDCD1
cg01542019	0	1	4	44	95	68	1.16103e-10	TECR
cg15375424	0	31	6	1	93	81	1.16376e-10	IRF1
cg01696784	17	1	0	22	82	90	1.16483e-10	SH3BP4
cg11668844	0	1	2	39	97	73	1.17933e-10	MCF2L
cg21699330	0	32	2	5	97	76	1.18382e-10	NFE2L3
cg03018256	27	81	0	0	72	32	1.20254e-10	TTYH2
cg17042439	8	50	0	4	91	59	1.23455e-10	PTGFRN
cg02541582	0	0	62	109	37	4	1.34607e-10	UGP2
cg11308649	59	19	0	0	40	94	1.35931e-10	BAIAP2L2
cg11049439	63	23	0	1	36	89	1.41423e-10	C2
cg04517323	0	0	52	103	47	10	1.49601e-10	LAPTM4B
cg08564601	1	36	0	0	98	77	1.51732e-10	MS4A4A
cg05368275	85	50	0	0	14	63	1.58814e-10	DDX5
cg06122613	19	3	0	25	80	85	1.63511e-10	PI4KB
cg16970828	0	0	96	71	3	42	1.64196e-10	UBA7
cg19004465	13	0	0	22	86	91	1.71896e-10	TBC1D16
cg16231355	5	45	0	2	94	66	1.81564e-10	GPR34
cg15937641	3	40	0	2	96	71	1.81636e-10	PTGFRN
cg08055330	11	0	0	24	88	89	2.14157e-10	RABL6
cg14005217	0	0	0	32	99	81	2.22176e-10	PKMYT1
cg16415834	0	0	0	32	99	81	2.22176e-10	GPR143
cg00635560	0	0	0	32	99	81	2.22176e-10	PMEL
cg24868305	0	0	0	32	99	81	2.22176e-10	EPHX1
cg13121732	1	0	0	32	98	81	2.22176e-10	AKT1
cg13348062	55	105	0	0	44	8	2.2305e-10	AACS
cg08134678	0	31	0	2	99	80	2.23147e-10	ARHGAP9
cg15495463	18	2	0	23	81	88	2.24883e-10	MBP
cg04999352	0	20	26	4	73	89	2.30417e-10	RARRES3
cg02838784	53	15	0	4	46	94	2.31939e-10	SLC3A2
cg01117705	94	67	0	0	5	46	2.42341e-10	WDR81
cg01484156	33	8	0	21	66	84	2.47332e-10	NCALD
cg11276986	0	0	57	106	42	7	2.55849e-10	CAP2
cg00487187	0	20	18	1	81	92	2.56816e-10	HHEX
cg18337363	44	18	0	25	55	70	2.90025e-10	NT5DC2
cg09319815	82	46	0	0	17	67	2.9096e-10	PDCD1
cg20585841	28	81	0	0	71	32	3.09541e-10	NCALD
cg03076037	0	0	32	85	67	28	3.11227e-10	BAIAP2
cg07085177	69	30	0	0	30	83	3.11366e-10	WDR81
cg04904276	0	0	41	94	58	19	3.24015e-10	TXNDC11
cg02626307	16	0	0	17	83	96	3.29249e-10	CCT3
cg25315312	63	109	0	0	36	4	3.31438e-10	MAD1L1
cg02010963	0	0	63	109	36	4	3.31438e-10	UBALD1
cg21485555	63	109	0	0	36	4	3.31438e-10	TTYH2
cg14088811	1	35	0	0	98	78	3.38988e-10	SPI1
cg25773262	1	35	0	0	98	78	3.38988e-10	BCAN
cg19879075	0	7	53	16	46	90	3.45511e-10	SPOCK2
cg15039603	96	72	0	0	3	41	3.73062e-10	ITGB2
cg13315706	0	31	3	5	96	77	3.84745e-10	ITGB2
cg26549084	63	25	0	7	36	81	3.95485e-10	FNDC3B
cg10030684	12	1	0	25	87	87	4.19842e-10	BAIAP2
cg18907454	91	61	0	1	8	51	4.24489e-10	TRIM27
cg06191034	14	0	0	19	85	94	4.32366e-10	ABR
cg02841912	0	20	2	17	97	76	4.52926e-10	SYNE1
cg07946277	0	30	5	1	94	82	4.59149e-10	CYTH1
cg21829783	0	32	23	14	76	67	4.614e-10	SLAMF6
cg02025435	66	28	0	7	33	78	5.00605e-10	TUBB3
cg11623339	0	31	0	0	99	82	5.10188e-10	MZB1
cg18512948	0	31	0	0	99	82	5.10188e-10	REC8
cg03074244	0	31	0	0	99	82	5.10188e-10	CD3D
cg06856840	0	0	0	31	99	82	5.10188e-10	FAH
cg24902920	0	32	9	8	90	73	5.10284e-10	TFAP2A
cg15621731	15	63	0	0	84	50	5.15814e-10	KDM4B
cg12810837	1	35	3	2	95	76	5.23698e-10	CLEC2D
cg22699620	0	0	5	45	94	68	5.32322e-10	ITGB2
cg24425984	5	45	0	0	94	68	5.32322e-10	MGAT5B
cg13762244	46	13	0	12	53	88	5.44142e-10	CAPN1
cg23430771	10	0	0	23	89	90	5.65551e-10	SLC45A2
cg03181117	50	13	0	0	49	100	5.66619e-10	SCARF1
cg09426383	0	30	7	12	92	71	5.92997e-10	SKAP2
cg03769939	4	36	0	8	95	69	6.02364e-10	RUNX3
cg08008072	0	0	58	106	41	7	6.03449e-10	CLCN7
cg13373589	0	6	9	48	90	59	6.29732e-10	TFAP2A
cg01574481	2	38	0	0	97	75	6.38331e-10	REC8
cg07675031	2	38	0	0	97	75	6.38331e-10	SPI1
cg14689537	0	30	30	15	69	68	6.52328e-10	HHEX
cg10925082	0	27	21	6	78	80	6.64224e-10	ARHGDIB
cg16711096	83	48	0	2	16	63	6.88442e-10	SLC25A3
cg09471455	0	31	6	6	93	76	6.99531e-10	TBC1D10C
cg02958263	0	0	21	71	78	42	7.31031e-10	RABGAP1L
cg05314350	61	23	0	3	38	87	7.34193e-10	TRIM27
cg16508068	0	30	0	1	99	82	7.37418e-10	HHEX
cg02028663	0	1	0	30	99	82	7.37418e-10	FLI1
cg18732032	0	30	0	1	99	82	7.37418e-10	TFAP2A
cg10536999	0	24	31	10	68	79	8.1434e-10	NFE2L3
cg01974375	0	0	74	113	25	0	8.54612e-10	PI4KB
cg23327011	20	1	0	15	79	97	8.5681e-10	MBP
cg11493223	0	31	8	6	91	76	8.58501e-10	TMC6
cg13303654	0	29	0	2	99	82	8.61168e-10	ZEB1
cg06694446	0	2	0	29	99	82	8.61168e-10	CCDC50
cg09862733	0	2	0	29	99	82	8.61168e-10	PPFIA3
cg24687529	0	29	2	5	97	79	8.73257e-10	PTGFRN
cg12252069	5	41	1	7	93	65	8.78767e-10	SKAP2
cg01131699	0	31	7	6	92	76	9.37025e-10	ARHGEF6
cg15052335	41	93	0	0	58	20	9.64428e-10	LPIN2
cg08090640	0	2	4	41	95	70	9.79349e-10	IFI35
cg24111025	3	38	12	3	84	72	1.02246e-09	TAP1
cg00907842	11	5	1	34	87	74	1.02377e-09	FYB
cg10540110	0	0	27	78	72	35	1.05678e-09	KDM5B
cg18124488	3	1	0	30	96	82	1.05792e-09	SLFN11
cg24400630	5	44	0	0	94	69	1.15943e-09	GBP5
cg09370867	5	44	0	0	94	69	1.15943e-09	FGR
cg12301823	0	0	0	30	99	83	1.16747e-09	KIAA1522
cg16051685	0	0	0	30	99	83	1.16747e-09	TRIM63
cg03984055	0	0	0	30	99	83	1.16747e-09	BCKDK
cg00591949	0	0	0	30	99	83	1.16747e-09	CCDC50
cg14384158	0	14	9	38	90	61	1.17125e-09	NSMF
cg09831081	85	52	0	3	14	58	1.23929e-09	LSS
cg16922167	9	52	0	0	90	61	1.24325e-09	FGR
cg04125962	9	52	0	0	90	61	1.24325e-09	GTF3C1
cg11708721	2	35	1	4	96	74	1.25126e-09	PTGFRN
cg22402467	0	3	0	27	99	83	1.25565e-09	C1S
cg11824582	88	57	0	1	11	55	1.26737e-09	SYNE1
cg08350119	53	17	0	4	46	92	1.54099e-09	DDX5
cg15585555	0	30	6	5	93	78	1.62663e-09	RASSF5
cg23887746	0	2	2	35	97	76	1.6272e-09	STX16
cg10742957	0	1	61	106	38	6	1.63301e-09	FBXO17
cg20446334	80	50	0	19	19	44	1.75456e-09	BAIAP2
cg01673307	5	42	15	4	79	67	1.75736e-09	TAP1
cg25236416	56	19	0	2	43	92	1.75895e-09	HDAC4
cg09042791	59	22	0	0	40	91	1.78572e-09	SH3BP4
cg04597312	1	24	2	16	96	73	1.85759e-09	IRF8
cg00092518	0	31	41	32	58	50	1.86113e-09	PHF11
cg11081833	7	47	0	1	92	65	1.87394e-09	LGALS2
cg11254522	7	48	0	0	92	65	1.87394e-09	FGR
cg21625464	0	0	92	65	7	48	1.87394e-09	IFITM1
cg22151713	19	1	0	15	80	97	1.90205e-09	SLC4A2
cg16521606	74	38	0	0	25	75	1.99833e-09	INTS1
cg12616941	24	2	0	12	75	99	2.01973e-09	BMI1
cg01399317	1	32	0	1	98	80	2.03084e-09	FAM83H
cg24824686	0	9	0	21	99	83	2.11604e-09	PTPRE
cg14308867	89	60	0	0	10	53	2.12554e-09	PRRC2A
cg14386061	0	29	2	3	97	81	2.25367e-09	DOK2
cg19525717	0	0	56	104	43	9	2.26585e-09	PKIG
cg03296204	10	2	0	26	89	85	2.42086e-09	TBC1D16
cg19784198	0	29	10	5	89	79	2.46836e-09	ADRBK1
cg18085627	0	30	10	8	89	75	2.47849e-09	CCDC88B
cg20943353	67	110	0	0	32	3	2.494e-09	MAD1L1
cg04489573	9	1	0	25	90	87	2.60248e-09	TRIM63
cg11613003	6	45	0	0	93	68	2.615e-09	FZD7
cg04498679	0	0	0	29	99	84	2.6623e-09	C2
cg22588546	45	13	0	10	54	90	2.67281e-09	MYH10
cg11829616	86	55	0	0	13	58	2.67581e-09	FARP1
cg21439672	6	44	0	2	93	67	2.68574e-09	C1RL
cg02998933	9	51	0	0	90	62	2.69001e-09	BTK
cg11318342	88	58	0	0	11	55	2.83047e-09	SYNE1
cg12665414	20	2	0	17	79	94	2.84714e-09	CPEB4
cg08209711	51	100	0	0	48	13	2.96463e-09	PSMB9
cg26168651	0	2	1	31	98	80	2.97599e-09	NOS3
cg14548509	0	19	3	19	96	75	2.97627e-09	SFRP1
cg18151134	54	18	0	3	45	92	2.99687e-09	BACE2
cg11611856	23	5	0	21	76	87	3.03412e-09	UAP1L1
cg03163819	84	52	0	1	15	60	3.13176e-09	VAT1
cg08782022	23	24	3	39	73	50	3.15162e-09	MGRN1
cg01481970	0	0	45	95	54	18	3.20295e-09	PPFIA3
cg04835383	54	18	0	0	45	95	3.20295e-09	TRIM27
cg12852872	91	64	0	0	8	49	3.35037e-09	RNF213
cg25577379	91	64	0	0	8	49	3.35037e-09	MED15
cg19242568	77	42	0	0	22	71	3.35938e-09	KRBA1
cg01972875	0	0	65	109	34	4	3.36059e-09	FAM65A
cg00876273	0	24	13	2	86	87	3.36812e-09	HHEX
cg02621540	83	51	0	0	16	62	3.42808e-09	SPATA20
cg06291111	82	49	0	0	17	64	3.44111e-09	PDCD1
cg27152208	0	27	5	1	94	85	3.46682e-09	TFAP2A
cg09672452	6	45	1	0	92	68	3.47666e-09	CCPG1
cg19475224	0	0	1	32	98	81	3.65393e-09	NOS3
cg06374794	76	42	0	9	23	62	3.66672e-09	BANP
cg16600934	33	5	0	8	66	100	3.81823e-09	AKT1
cg25947619	0	15	68	36	31	62	3.88282e-09	AKAP13
cg24670442	70	111	0	0	29	2	4.03225e-09	GBP5
cg22257574	0	1	0	28	99	84	4.04406e-09	C9orf9
cg14266859	12	56	0	0	87	57	4.0843e-09	JAG2
cg09578086	92	66	0	1	7	46	4.12708e-09	C2
cg21107579	18	1	0	15	81	97	4.19877e-09	MBP
cg15621651	80	47	0	8	19	58	4.23449e-09	PTPRE
cg05656688	0	24	1	8	98	81	4.42432e-09	RUNX3
cg03970615	0	0	10	52	89	61	4.52942e-09	IRX3
cg24799795	1	2	0	28	98	83	4.54494e-09	TRIM5
cg15316716	1	31	0	1	98	81	4.54991e-09	DOK2
cg02996131	0	1	1	31	98	81	4.54991e-09	SYNE1
cg24715245	0	4	3	35	96	74	4.56598e-09	UCHL1
cg08111832	0	0	48	97	51	16	4.599e-09	NYNRIN
cg07281781	66	30	0	0	33	83	4.60692e-09	PDCD1
cg11381564	0	28	3	1	96	84	4.65305e-09	PSMB8
cg14268557	69	33	0	4	30	76	4.66592e-09	TRIM27
cg07853063	95	73	0	0	4	40	4.89973e-09	INTS1
cg20689661	27	6	0	18	72	89	5.02004e-09	MAD1L1
cg00579960	1	6	0	25	98	82	5.04144e-09	SCAF4
cg27074995	42	9	0	0	57	104	5.04881e-09	JAK3
cg10145584	19	66	0	0	80	47	5.2687e-09	IL10RA
cg09316306	1	31	30	15	68	67	5.29292e-09	TLR1
cg03156769	0	0	76	113	23	0	5.32738e-09	FBXL5
cg12547085	0	0	0	28	99	85	6.05011e-09	NOS3
cg14114282	2	1	0	28	97	84	6.05011e-09	MCF2L
cg00041666	1	0	0	28	98	85	6.05011e-09	SYNE1
cg01437204	0	26	0	2	99	85	6.17449e-09	PTPN7
cg01229998	0	2	1	30	98	81	6.81721e-09	MS4A4A
cg25073137	55	102	0	0	44	11	6.9315e-09	CASP8
cg11313468	44	11	0	1	55	101	6.9315e-09	HNRNPUL1
cg09664216	44	12	0	7	55	94	6.98623e-09	HDAC4
cg10855276	10	1	0	23	89	89	7.00836e-09	MCF2L
cg10925640	3	4	0	28	96	81	7.09943e-09	MDC1
cg18495884	61	106	0	0	38	7	7.40873e-09	MAD1L1
cg05385434	1	16	0	16	98	81	7.56411e-09	EPHX1
cg12784386	5	0	0	24	94	89	7.59383e-09	BAIAP2
cg02705800	0	27	28	35	71	51	7.71813e-09	FAM174B
cg08398233	0	0	1	31	98	82	7.98564e-09	CAMK2N1
cg21322241	27	2	0	3	72	108	8.27486e-09	MBP
cg03670228	76	42	0	0	23	71	8.43652e-09	EIF3B
cg05068636	83	52	0	1	16	60	9.00914e-09	SPG11
cg24042452	11	0	0	18	88	95	9.11271e-09	CCT3
cg25719851	0	27	0	1	99	85	9.40852e-09	PTPN6
cg02868254	0	1	0	27	99	85	9.40852e-09	FRA10AC1
cg16948335	77	44	0	0	22	69	9.5161e-09	PSMD9
cg06164961	5	40	0	2	94	71	1.05608e-08	CD3E
cg01479473	2	0	0	26	97	87	1.10092e-08	CLCN7
cg25358289	0	9	10	42	89	62	1.12326e-08	CD14
cg14558573	0	0	15	59	84	54	1.12595e-08	CAMK1
cg23975646	11	1	0	21	88	91	1.14313e-08	MBP
cg25566507	25	3	0	12	74	98	1.15647e-08	JAK3
cg02639080	73	39	0	3	26	71	1.18383e-08	TRIM27
cg01361446	0	25	3	0	96	88	1.1939e-08	IL2RG
cg22227034	67	32	0	4	32	77	1.22057e-08	TNFRSF1B
cg02914427	0	27	6	3	93	83	1.22369e-08	SPN
cg10261205	48	96	0	0	51	17	1.29993e-08	ATHL1
cg03342498	0	0	77	113	22	0	1.31455e-08	TFAP2A
cg25422089	13	0	0	15	86	98	1.35113e-08	TTYH2
cg04359828	6	2	0	26	93	85	1.3679e-08	ARHGAP12
cg06427816	0	0	0	27	99	86	1.37005e-08	ABR
cg23994191	0	0	0	27	99	86	1.37005e-08	HK3
cg13937155	0	27	0	0	99	86	1.37005e-08	SCARF1
cg19827346	1	0	0	27	98	86	1.37005e-08	SYNE1
cg13806292	1	0	0	27	98	86	1.37005e-08	SYNE1
cg00588517	1	0	0	27	98	86	1.37005e-08	C2
cg07588439	1	1	0	27	98	85	1.37005e-08	MARS2
cg07313078	0	25	0	2	99	86	1.40115e-08	GPR143
cg19918549	0	26	25	13	74	74	1.46109e-08	EVL
cg18557145	16	60	0	0	83	53	1.53165e-08	CD72
cg07427606	8	47	0	0	91	66	1.54677e-08	MMP17
cg06640364	56	102	0	0	43	11	1.55427e-08	WIPI2
cg12123019	0	0	62	27	37	86	1.55929e-08	IL12RB1
cg04947157	0	27	3	3	96	83	1.65203e-08	TMC6
cg06872172	11	51	0	2	88	60	1.69307e-08	PRCC
cg14654075	0	0	36	85	63	28	1.71155e-08	GPR143
cg17416338	1	30	0	0	98	83	1.73637e-08	KDM4B
cg08822075	0	27	4	4	95	82	1.87548e-08	NFE2L3
cg12406879	97	79	0	4	2	30	1.99272e-08	MMP17
cg05057634	0	0	52	99	47	14	2.09018e-08	MGAT5B
cg15590007	1	5	0	24	98	84	2.17306e-08	ALOX5
cg19646897	0	24	1	5	98	84	2.17306e-08	HAVCR2
cg09897131	21	66	0	1	78	46	2.22568e-08	VAMP1
cg19008097	0	1	1	29	98	83	2.25148e-08	CD14
cg25591888	0	1	1	29	98	83	2.25148e-08	SH3BP4
cg21115433	2	31	1	5	96	77	2.2783e-08	FGR
cg05689267	43	11	0	1	56	101	2.28373e-08	TAP2
cg21105955	0	2	3	34	96	77	2.28733e-08	MDC1
cg01138448	3	34	0	2	96	77	2.28733e-08	TRIM69
cg25643644	6	35	0	8	93	70	2.31162e-08	CD3D
cg24316949	0	0	15	58	84	55	2.35944e-08	ARPC5
cg08617683	0	4	5	37	94	72	2.37528e-08	FBRSL1
cg24436906	0	0	26	73	73	40	2.47528e-08	BOK
cg11360546	18	3	0	18	81	92	2.73735e-08	C7orf50
cg04234016	0	26	2	3	97	84	2.76484e-08	PTPN6
cg00078867	13	55	3	1	83	57	2.76859e-08	WAS
cg20667124	59	25	0	0	40	88	2.87281e-08	NCLN
cg00822451	0	0	40	88	59	25	2.87281e-08	NYNRIN
cg01084215	21	1	0	8	78	104	2.91931e-08	TBC1D16
cg18418655	0	21	12	2	87	90	2.93452e-08	IL2RG
cg07257505	55	21	0	0	44	92	2.94661e-08	MYH10
cg19915305	0	0	44	92	55	21	2.94661e-08	UGP2
cg25015733	44	92	0	0	55	21	2.94661e-08	MGAT4A
cg21475402	0	1	44	91	55	21	2.94661e-08	BCAN
cg03873220	20	65	0	0	79	48	2.96668e-08	PARP12
cg06613263	7	32	1	15	91	66	2.9954e-08	NR3C1
cg24970620	83	53	0	2	16	58	3.06306e-08	SLC7A7
cg09153080	0	26	1	0	98	87	3.09123e-08	CD6
cg13998293	1	0	0	26	98	87	3.09123e-08	TRIM63
cg06889108	0	1	0	25	99	87	3.09123e-08	CPEB4
cg08282145	0	0	0	26	99	87	3.09123e-08	NYNRIN
cg15847272	0	0	0	26	99	87	3.09123e-08	C2
cg07839313	0	26	0	0	99	87	3.09123e-08	BST2
cg02431562	0	26	0	0	99	87	3.09123e-08	DUSP2
cg09134794	0	25	20	28	79	60	3.10318e-08	EN2
cg05812430	88	62	0	0	11	51	3.14621e-08	INTS1
cg00328724	0	1	5	39	94	73	3.14818e-08	CTPS1
cg19307003	74	42	0	5	25	66	3.22076e-08	CD6
cg13869648	86	58	0	2	13	53	3.28482e-08	C9orf9
cg00196407	0	0	2	32	97	81	3.34226e-08	ABR
cg11164649	0	0	57	102	42	11	3.43579e-08	ABI3
cg21094405	0	2	1	28	98	83	3.51693e-08	MCF2L
cg06475006	56	22	0	2	43	89	3.57217e-08	MC1R
cg24613375	26	4	0	11	73	98	3.7957e-08	MCF2L
cg01970923	34	9	0	12	65	92	3.8938e-08	MCF2L
cg21851553	9	0	0	18	90	95	3.97485e-08	TRPM1
cg22221320	0	8	62	30	37	75	4.12343e-08	GBP4
cg14622819	0	22	0	4	99	87	4.16539e-08	CXCL10
cg14055351	70	37	0	3	29	73	4.24435e-08	CSNK1E
cg12703269	22	67	0	0	77	46	4.25254e-08	PSTPIP1
cg07682179	81	51	0	0	18	62	4.31463e-08	ULK1
cg20708856	7	0	0	20	92	93	4.37419e-08	ATP11A
cg02212683	96	78	0	0	3	35	4.42682e-08	AP5Z1
cg13072717	0	2	43	12	56	99	4.45759e-08	ST6GAL1
cg18252731	1	28	26	34	72	51	4.49757e-08	FAM174B
cg22418909	0	0	53	99	46	14	4.50171e-08	SFRP1
cg02753187	0	16	22	4	77	93	4.5677e-08	CALCOCO2
cg02600514	92	70	0	0	7	43	4.73986e-08	ATP6V0D1
cg01038597	58	25	0	5	41	83	4.74049e-08	BCKDK
cg02151752	95	76	0	0	4	37	4.83545e-08	TAP2
cg09721047	0	22	7	1	92	90	4.92495e-08	ARHGAP25
cg17894088	1	6	2	29	96	78	4.98009e-08	KHDRBS3
cg18584265	93	72	0	0	6	41	4.98704e-08	SYDE1
cg07156249	0	8	65	33	34	72	5.01752e-08	PSMB9
cg15013801	7	7	0	26	92	80	5.22691e-08	ANAPC16
cg05796838	16	1	0	13	83	99	5.25209e-08	JAK3
cg12608692	15	10	0	26	84	77	5.26814e-08	MYO10
cg18446578	0	0	73	111	26	2	5.30679e-08	SEMA6A
cg03560685	90	66	0	0	9	47	5.33537e-08	MBP
cg21295295	86	59	0	0	13	54	5.5403e-08	TMEM79
cg13724285	86	59	0	0	13	54	5.5403e-08	SMARCA4
cg04675427	69	36	0	0	30	77	5.58101e-08	C1RL
cg18240331	0	23	10	3	89	87	5.5926e-08	TFAP2A
cg03379797	10	3	0	23	89	87	5.5926e-08	NHSL1
cg17780682	66	33	0	0	33	80	5.59351e-08	ABR
cg07616394	0	18	25	7	74	88	5.68083e-08	HHEX
cg19812944	9	0	0	17	90	96	6.06952e-08	DNAAF5
cg01210663	0	1	6	40	93	72	6.17795e-08	FBP1
cg09430932	59	26	0	0	40	87	6.84804e-08	POLD2
cg04899753	1	0	0	25	98	88	6.94826e-08	WARS
cg16751778	1	0	0	25	98	88	6.94826e-08	SQRDL
cg14389924	0	1	0	24	99	88	6.94826e-08	PELP1
cg21288889	0	1	0	24	99	88	6.94826e-08	PNRC1
cg12433559	0	24	0	1	99	88	6.94826e-08	PRF1
cg01346718	0	0	0	25	99	88	6.94826e-08	CSNK1E
cg14007706	0	0	0	25	99	88	6.94826e-08	SLC25A23
cg12072789	0	25	0	0	99	88	6.94826e-08	SLC6A17
cg03926640	0	0	0	25	99	88	6.94826e-08	BAIAP2
cg10124440	0	0	0	25	99	88	6.94826e-08	CDCA3
cg09874127	0	0	97	82	2	31	7.01993e-08	UBA7
cg04287216	95	76	0	1	4	36	7.05183e-08	TRIM5
cg01034813	28	3	0	1	71	109	7.05915e-08	GTF3C1
cg05315334	0	2	0	23	99	88	7.13801e-08	MCF2L
cg19563932	0	23	0	2	99	88	7.13801e-08	AIF1
cg25510609	0	12	70	41	29	60	7.30886e-08	AKAP13
cg00095918	90	66	0	1	9	46	7.50831e-08	MAD1L1
cg21091766	9	46	0	1	90	66	7.50831e-08	DBN1
cg12535280	0	0	76	112	23	1	7.85859e-08	PARVA
cg03784054	0	0	76	112	23	1	7.85859e-08	FAM65A
cg20747577	0	25	14	18	85	70	7.98025e-08	SKAP2
cg27597145	98	85	0	0	1	28	8.08732e-08	ULK1
cg21188037	0	25	5	4	94	84	8.11636e-08	MYO1G
cg11813073	0	22	6	1	93	90	8.30442e-08	DENND1C
cg16421871	0	0	51	97	48	16	8.49461e-08	MCF2L
cg02851793	0	17	12	1	87	95	8.57424e-08	SRGN
cg00675891	9	3	0	23	90	87	8.9053e-08	MCF2L
cg09247692	81	52	0	1	18	60	9.06101e-08	BAIAP2L2
cg05142942	51	19	0	0	48	94	9.19378e-08	PSTPIP1
cg04556412	12	0	0	13	87	100	9.27305e-08	DNAAF5
cg00037681	0	26	34	31	65	56	9.31862e-08	PCED1B
cg25765104	0	25	4	3	95	85	9.49448e-08	RCSD1
cg17904575	1	28	6	3	92	82	9.60067e-08	PPP2R5C
cg24127748	28	15	0	23	71	75	9.60253e-08	CECR1
cg09716613	0	7	48	18	51	88	9.68555e-08	N4BP2L1
cg21365602	0	12	61	32	38	69	9.75916e-08	GBP4
cg04908668	66	106	0	1	33	6	9.97215e-08	PSMB9
cg27379915	0	1	21	64	78	48	1.00736e-07	ZDHHC13
cg22004422	4	36	0	0	95	77	1.02121e-07	MCF2L
cg18599843	0	18	22	6	77	89	1.02293e-07	HHEX
cg20021784	0	17	42	19	57	77	1.03586e-07	CFLAR
cg13728106	34	8	0	7	65	98	1.03655e-07	RABL6
cg09874482	5	38	0	0	94	75	1.04226e-07	AKAP13
cg11659652	10	29	0	16	89	68	1.04405e-07	PTPRE
cg13563634	0	0	3	33	96	80	1.04747e-07	TAP2
cg05309505	96	80	0	0	3	33	1.04747e-07	IRF7
cg04046629	4	5	1	28	94	80	1.09278e-07	CD6
cg05274944	81	52	0	3	18	58	1.09368e-07	TYRP1
cg17959722	0	0	61	104	38	9	1.12063e-07	MRPL41
cg00903584	0	23	2	0	97	90	1.15515e-07	PTPN7
cg23233589	0	4	19	58	80	51	1.22411e-07	SYNE1
cg02723617	0	0	36	82	63	31	1.22605e-07	SLC4A2
cg01687402	68	36	0	0	31	77	1.22961e-07	SPATA20
cg17127015	35	12	0	14	64	87	1.24494e-07	ADPGK
cg24401737	0	20	3	12	96	81	1.2813e-07	CASP10
cg15982099	20	63	0	0	79	50	1.28514e-07	SPI1
cg18621299	0	25	14	10	85	78	1.29987e-07	EVL
cg00500213	57	25	0	0	42	88	1.34458e-07	LZTR1
cg13221347	0	5	0	20	99	88	1.40423e-07	STK32C
cg06692120	0	0	63	105	36	8	1.4211e-07	TMEM97
cg21712830	0	0	63	105	36	8	1.4211e-07	LRRC75B
cg12537337	0	13	26	6	73	94	1.47995e-07	BTN3A3
cg02162880	0	22	5	1	94	90	1.48848e-07	TFAP2A
cg24147838	1	20	0	8	98	85	1.52061e-07	LAIR1
cg26308330	0	0	30	75	69	38	1.54871e-07	PRRX1
cg09307264	0	0	0	24	99	89	1.55555e-07	KIF1C
cg18757087	0	1	0	23	99	89	1.55555e-07	CPEB4
cg02848875	0	1	0	23	99	89	1.55555e-07	SNX1
cg06787669	0	24	2	2	97	87	1.55555e-07	MYO1G
cg12589538	0	1	9	45	90	67	1.56584e-07	TAPBP
cg23120601	8	1	0	20	91	92	1.63547e-07	PLCB2
cg12890903	0	0	0	23	99	90	1.66963e-07	NYNRIN
cg04728789	0	0	0	23	99	90	1.66963e-07	CSNK1E
cg24941703	89	66	0	0	10	47	1.70432e-07	MAD1L1
cg24525952	34	79	0	1	65	33	1.7191e-07	MAD1L1
cg17204993	0	24	8	5	91	84	1.72071e-07	ARHGEF6
cg00064255	0	23	54	38	45	52	1.7229e-07	LRRC8C
cg06749872	0	22	0	1	99	90	1.74781e-07	CORO1A
cg26227523	0	22	0	1	99	90	1.74781e-07	PSTPIP1
cg27283345	0	21	0	3	99	89	1.76047e-07	TFAP2A
cg19307500	50	19	0	3	49	91	1.77323e-07	HMHA1
cg04422903	0	16	0	8	99	89	1.83347e-07	CCDC88B
cg17945447	0	1	70	108	29	4	1.86356e-07	HIVEP3
cg13567299	6	0	0	19	93	94	1.87212e-07	GDPD5
cg04756698	81	53	0	1	18	59	1.87501e-07	NDRG1
cg10048215	21	5	0	16	78	92	1.88296e-07	APOLD1
cg02482460	0	11	54	26	45	76	1.89208e-07	GBP4
cg13284614	50	25	0	15	49	73	1.92167e-07	NT5DC2
cg13784264	0	23	28	35	71	55	1.93897e-07	FAM174B
cg25468618	15	55	0	0	84	58	2.01744e-07	FAM83H
cg10087172	0	3	68	37	31	73	2.02783e-07	ARHGDIB
cg01854491	7	4	1	27	91	82	2.12361e-07	FAM83H
cg13429423	5	37	0	0	94	76	2.1439e-07	PARVG
cg16814796	0	23	30	37	69	53	2.1493e-07	CAMK2N1
cg16435077	74	44	0	0	25	69	2.18607e-07	EIF4G1
cg05627561	74	44	0	0	25	69	2.18607e-07	MRPS12
cg23694492	0	0	67	107	32	6	2.18703e-07	TTYH3
cg08115100	90	68	0	0	9	45	2.23605e-07	UBALD1
cg03730533	5	36	11	18	83	59	2.30455e-07	SKAP2
cg20090162	4	3	1	27	94	83	2.35264e-07	TTC7A
cg20187047	1	0	0	23	98	90	2.40221e-07	SYNE1
cg07186032	0	23	1	0	98	90	2.40221e-07	ARHGEF3
cg21939215	0	20	7	1	92	92	2.45005e-07	CD6
cg00250879	4	32	0	4	95	77	2.59606e-07	ARHGEF6
cg21402832	0	0	55	24	44	89	2.59922e-07	TNFSF10
cg16873414	2	28	0	2	97	83	2.60381e-07	PARVG
cg23462687	79	51	0	0	20	62	2.61737e-07	HDAC4
cg05516271	53	26	0	12	46	75	2.647e-07	SNX8
cg01016119	0	23	4	5	95	85	2.66496e-07	ARHGEF3
cg10338830	1	28	12	10	86	75	2.66917e-07	EMP3
cg22180580	14	3	0	18	85	92	2.68603e-07	NHSL1
cg23884690	75	46	0	5	24	62	2.7166e-07	MCF2L
cg17676246	3	23	1	13	95	77	2.71741e-07	ARHGEF6
cg23245481	3	0	0	21	96	92	2.72181e-07	BRI3
cg23501439	52	21	0	0	47	92	2.74275e-07	DNAAF5
cg26394055	51	93	0	2	48	18	2.82819e-07	FCER1G
cg17127769	0	22	27	15	72	76	2.82904e-07	LCP2
cg18489440	0	24	26	20	73	69	2.85811e-07	SEL1L3
cg01275934	97	84	0	0	2	29	3.03892e-07	SNX8
cg11558705	78	50	0	0	21	63	3.07448e-07	RITA1
cg14967066	0	7	45	17	54	89	3.13445e-07	IFITM1
cg16787352	4	0	0	20	95	93	3.18141e-07	ANKRD9
cg27429749	0	4	90	68	9	41	3.25167e-07	UBE2L6
cg22733133	0	3	38	80	61	30	3.31102e-07	EN2
cg08578023	0	5	87	63	12	45	3.34884e-07	CTSS
cg10635645	36	11	0	8	63	94	3.38649e-07	APOLD1
cg15442268	22	1	0	0	77	112	3.46779e-07	C2
cg14589681	63	32	0	1	36	80	3.47466e-07	C2
cg20371401	0	0	0	22	99	91	3.50626e-07	C2
cg08018825	0	22	0	0	99	91	3.50626e-07	SEL1L3
cg11801411	0	0	0	22	99	91	3.50626e-07	WDR81
cg00369658	0	0	0	22	99	91	3.50626e-07	SERPING1
cg00366917	6	8	0	23	93	82	3.50824e-07	MBP
cg22989958	1	26	0	0	98	87	3.69269e-07	DOK1
cg24902842	1	26	0	0	98	87	3.69269e-07	UBA7
cg08677655	0	21	0	1	99	91	3.6967e-07	SCARF1
cg25258033	0	21	0	1	99	91	3.6967e-07	RNASET2
cg11657323	38	10	0	1	61	102	3.80421e-07	CCDC88B
cg22840076	33	7	0	0	66	106	3.82671e-07	HNRNPUL1
cg10453071	0	3	0	20	99	90	3.9623e-07	DOK4
cg02911509	0	20	0	3	99	90	3.9623e-07	PARVG
cg14211930	0	20	0	3	99	90	3.9623e-07	FBP1
cg07146773	74	45	0	0	25	68	4.49938e-07	FAH
cg21191810	0	0	9	44	90	69	4.50639e-07	CEP85L
cg23693289	0	23	15	9	84	81	4.61033e-07	PTK2B
cg13909178	28	5	0	5	71	103	4.62913e-07	FLI1
cg01768328	20	1	0	3	79	109	4.64965e-07	WDR81
cg20799917	0	16	5	19	94	78	4.84014e-07	GALM
cg12369869	73	44	0	1	26	68	4.84717e-07	EIF4G1
cg10002888	73	44	0	0	26	69	4.84717e-07	PRRC2A
cg19989295	0	21	6	2	93	90	4.85162e-07	REC8
cg07805911	88	66	0	0	11	47	5.07067e-07	DNAAF5
cg13390441	1	25	0	1	98	87	5.18843e-07	NCS1
cg23712530	83	58	0	0	16	55	5.19157e-07	TECPR2
cg09662034	0	23	16	11	83	79	5.20921e-07	TFAP2C
cg00774435	72	43	0	0	27	70	5.21783e-07	C1RL
cg06939307	0	22	1	0	98	91	5.22624e-07	PTP4A2
cg23595621	0	19	0	3	99	91	5.26217e-07	RNASE6
cg16257219	0	1	23	64	76	48	5.40575e-07	TEAD4
cg08742502	0	23	15	17	84	73	5.79468e-07	PRDM1
cg21824343	22	2	0	4	77	107	5.90448e-07	WDR81
cg27534828	91	71	0	0	8	42	5.92986e-07	AP5Z1
cg02347312	9	1	0	17	90	95	6.19512e-07	MCF2L
cg19747604	2	28	0	0	97	85	6.26404e-07	CCDC8
cg04653522	0	0	58	100	41	13	6.3543e-07	RAB38
cg16604566	4	3	0	22	95	88	6.63572e-07	MBP
cg19880646	89	68	0	0	10	45	6.76378e-07	PRRC2A
cg24146100	42	86	0	0	57	27	6.81712e-07	DOCK9
cg06460888	3	2	0	22	96	89	6.94883e-07	MCF2L
cg12690127	0	22	8	5	91	86	7.12867e-07	PTPN6
cg11304234	0	21	1	2	98	90	7.18964e-07	IL18
cg02697649	54	97	0	0	45	16	7.24265e-07	FZD7
cg07728874	0	21	0	0	99	92	7.32829e-07	CD3D
cg05512310	0	0	0	21	99	92	7.32829e-07	C11orf58
cg16473141	0	21	0	0	99	92	7.32829e-07	REC8
cg01332462	0	0	0	21	99	92	7.32829e-07	MYO1D
cg08820801	0	0	0	21	99	92	7.32829e-07	FBXO17
cg02527527	0	0	0	21	99	92	7.32829e-07	MICALL1
cg01259871	58	28	0	1	41	84	7.33875e-07	POLR3H
cg13067221	0	18	0	5	99	90	7.54398e-07	AJUBA
cg04353769	0	20	0	1	99	92	7.78872e-07	MS4A6A
cg27395208	0	0	74	110	25	3	7.84476e-07	FLI1
cg26818165	0	0	59	29	40	84	7.89053e-07	DENND1C
cg12548824	0	4	0	18	99	91	7.89517e-07	MTUS1
cg17843418	32	9	0	8	67	96	8.04582e-07	TBC1D16
cg27573549	67	106	0	0	32	7	8.11571e-07	EPN1
cg04071866	22	2	0	2	77	109	8.12506e-07	MGRN1
cg02595823	0	21	2	3	97	89	8.2222e-07	SPOCK2
cg02474109	93	76	0	0	6	37	8.27582e-07	MAD1L1
cg02578070	0	21	17	9	82	83	8.79004e-07	MAN1A1
cg01338474	94	78	0	0	5	35	8.84425e-07	HNRNPUL1
cg04011497	94	78	0	0	5	35	8.84425e-07	RNF213
cg11374368	0	2	0	19	99	92	8.89376e-07	BOK
cg17375267	4	33	0	0	95	80	9.15476e-07	CCDC8
cg20369513	75	48	0	0	24	65	9.46731e-07	PRRC2A
cg25058482	0	5	71	43	28	65	9.59681e-07	TANK
cg03317045	0	16	43	23	56	74	1.03274e-06	KIAA0040
cg16292132	2	4	0	20	97	89	1.03621e-06	NHSL1
cg21878746	0	7	42	77	57	29	1.06431e-06	LAIR1
cg02167021	0	10	22	4	77	99	1.07061e-06	HCLS1
cg12177677	0	21	22	13	77	79	1.08155e-06	CYTIP
cg12435677	74	47	0	0	25	66	1.08386e-06	AP5Z1
cg23024444	0	1	32	74	67	38	1.15767e-06	SLU7
cg03421358	36	10	0	2	63	101	1.18451e-06	PEMT
cg03419646	26	7	0	11	73	95	1.18791e-06	ABI3
cg04691908	0	14	25	8	74	91	1.19216e-06	FLI1
cg05275752	0	10	36	66	63	37	1.2174e-06	GALM
cg24376434	0	21	1	1	98	91	1.22825e-06	PRRX1
cg07660635	0	10	0	12	99	91	1.24726e-06	IRF8
cg02736280	20	2	0	6	79	105	1.2662e-06	WDR81
cg06878960	82	58	0	0	17	55	1.27801e-06	GTF3C1
cg25403205	2	27	0	0	97	86	1.28316e-06	AIF1
cg24222580	24	57	0	7	75	49	1.30734e-06	MCF2L
cg01748498	56	27	0	0	43	86	1.37448e-06	NUDT1
cg01821684	0	0	43	86	56	27	1.37448e-06	RAC1
cg17353337	28	11	0	15	71	87	1.38131e-06	NHSL1
cg27024852	87	66	0	0	12	47	1.41245e-06	AP5Z1
cg25246431	0	0	77	111	22	2	1.43425e-06	PARVA
cg03052030	0	0	55	97	44	16	1.44097e-06	TRANK1
cg23947919	92	75	0	0	7	38	1.46643e-06	ULK1
cg00647820	0	11	10	32	89	70	1.47447e-06	DHX58
cg25070482	0	0	57	28	42	85	1.47481e-06	ARHGAP25
cg05381353	99	93	0	0	0	20	1.52471e-06	POLR2A
cg05446414	0	0	0	20	99	93	1.52471e-06	IL18BP
cg07065756	0	20	0	0	99	93	1.52471e-06	MAD1L1
cg02413187	63	34	0	2	36	77	1.55673e-06	MUM1
cg24146349	15	0	0	3	84	110	1.5628e-06	INTS1
cg02108623	0	22	11	11	88	80	1.58299e-06	PRDM1
cg05660881	0	19	0	1	99	93	1.63522e-06	SPATA13
cg16553052	36	11	0	5	63	97	1.6564e-06	SNX8
cg12797157	82	58	0	1	17	54	1.67211e-06	CCDC88B
cg07891971	0	1	58	98	41	14	1.70035e-06	CHAC1
cg04249142	0	0	75	110	24	3	1.71543e-06	NR2F6
cg26320696	0	0	75	110	24	3	1.71543e-06	PARVA
cg14014936	96	84	0	0	3	29	1.73894e-06	C9orf69
cg18597677	9	42	0	0	90	71	1.77188e-06	MMP17
cg11130530	94	79	0	0	5	34	1.773e-06	MAD1L1
cg16391678	0	17	0	4	99	92	1.7756e-06	ITGAL
cg26238936	0	9	22	4	77	100	1.79066e-06	ARHGAP25
cg14343548	0	21	8	6	91	86	1.79671e-06	ADRBK1
cg20761322	0	2	67	103	32	8	1.83947e-06	CIB2
cg10500147	0	19	13	5	86	89	1.84014e-06	LAG3
cg10549331	1	9	0	15	98	89	1.9366e-06	COL22A1
cg14802312	0	19	14	6	85	88	1.9441e-06	ARHGAP9
cg15287850	10	0	0	11	89	102	1.95433e-06	ST6GAL1
cg27098470	0	18	5	13	94	82	1.95902e-06	NFAM1
cg04314114	0	15	21	40	78	58	1.96933e-06	IRX3
cg08890338	21	5	0	12	78	96	2.03287e-06	MCF2L
cg19641924	7	6	0	21	92	86	2.06619e-06	MCF2L
cg02632542	21	2	0	3	78	108	2.10994e-06	TTYH2
cg05950755	20	3	0	8	79	102	2.11131e-06	JAK3
cg01407235	0	11	25	7	74	95	2.15308e-06	ARHGAP25
cg04822621	0	17	30	15	69	81	2.19198e-06	LCP2
cg08643131	2	4	0	19	97	90	2.22701e-06	MUM1
cg17903019	2	4	0	19	97	90	2.22701e-06	FBXL18
cg05350315	0	20	3	2	96	91	2.24446e-06	LCK
cg01135754	0	15	7	21	92	77	2.24872e-06	IRX3
cg08665810	0	0	38	80	61	33	2.33483e-06	BOK
cg23210906	67	39	0	0	32	74	2.34502e-06	ALOX5
cg14071853	70	43	0	0	29	70	2.35311e-06	ATP11A
cg20136100	0	20	22	14	77	79	2.36194e-06	FERMT3
cg05596756	0	21	13	9	86	83	2.39628e-06	PCED1B
cg00621407	91	74	0	0	8	39	2.45595e-06	CLCN7
cg01253676	0	1	5	33	94	79	2.5374e-06	TAPBP
cg22214335	0	10	14	38	85	65	2.56521e-06	CAMK2N1
cg17771150	0	17	9	2	90	94	2.61605e-06	LCP1
cg22495636	7	2	0	18	92	93	2.69309e-06	MCF2L
cg15962969	46	20	0	6	53	87	2.70443e-06	NHSL1
cg14934242	32	8	0	0	67	105	2.71533e-06	JAK3
cg17388653	0	10	33	12	66	91	2.80623e-06	IL2RG
cg00916255	0	16	12	3	87	94	3.1542e-06	PRRX1
cg04334773	99	94	0	0	0	19	3.15864e-06	SMARCA4
cg26847438	0	0	99	94	0	19	3.15864e-06	SP140L
cg06397161	0	19	0	0	99	94	3.15864e-06	SYNGR1
cg04959790	0	0	0	19	99	94	3.15864e-06	NR1H3
cg01581222	0	19	0	0	99	94	3.15864e-06	C19orf38
cg22706007	0	0	78	111	21	2	3.18696e-06	ARHGAP12
cg15600966	93	78	0	0	6	35	3.19721e-06	PRRC2A
cg16126958	0	0	6	35	93	78	3.19721e-06	THYN1
cg09182138	0	1	2	25	97	87	3.4124e-06	BCAN
cg08529529	0	18	0	1	99	94	3.42194e-06	ALOX5AP
cg25076039	14	2	0	12	85	99	3.44586e-06	DOCK2
cg16550438	96	85	0	0	3	28	3.44676e-06	CCDC88B
cg27333952	1	23	0	0	98	90	3.46624e-06	CLCN7
cg14730119	98	90	0	0	1	23	3.46624e-06	PRRC2A
cg13021301	0	0	69	106	30	7	3.51162e-06	CNTROB
cg02394186	0	6	12	40	87	67	3.54477e-06	KCNAB2
cg14428310	0	0	76	110	23	3	3.7116e-06	RAB38
cg18955629	10	0	0	8	89	105	3.72729e-06	SLC4A2
cg25140607	0	0	80	112	19	1	3.73479e-06	TFAP2A
cg16377609	0	0	52	93	47	20	3.74263e-06	WIPF3
cg20852557	29	6	0	0	70	107	3.77979e-06	EIF4G1
cg00421205	79	55	0	0	20	58	3.88998e-06	CLUH
cg00022866	0	17	0	2	99	94	4.04487e-06	CCDC88B
cg10180281	0	14	0	6	99	93	4.08616e-06	SKAP2
cg10784813	0	18	1	3	98	92	4.20124e-06	SOCS1
cg00869668	6	34	0	1	93	78	4.31491e-06	SCARF1
cg17334389	48	21	0	0	51	92	4.31884e-06	FAM57A
cg05335577	0	12	11	1	88	100	4.41948e-06	IL2RG
cg04726373	53	29	0	9	46	75	4.43273e-06	ATP6V0D1
cg14557787	82	60	0	0	17	53	4.58133e-06	AP2A1
cg22253830	86	66	0	1	13	46	4.59853e-06	ATXN7
cg03983223	0	0	62	35	37	78	4.64851e-06	WIPF1
cg01601628	0	0	64	37	35	76	4.65413e-06	CD74
cg25522582	91	75	0	0	8	38	4.65519e-06	MRPS12
cg12073548	49	22	0	2	50	89	4.76108e-06	AOAH
cg06695812	77	53	0	0	22	60	5.05133e-06	NUTF2
cg25948180	1	5	1	20	97	88	5.18605e-06	APIP
cg09561419	97	88	0	0	2	25	5.28293e-06	NLRC5
cg16747828	21	8	0	15	78	90	5.32825e-06	APOLD1
cg24024661	0	19	19	25	80	69	5.41622e-06	HMHA1
cg25700897	92	77	0	0	7	36	5.42528e-06	CDCA3
cg15357821	1	4	0	17	98	92	5.44277e-06	HK3
cg14189614	15	2	0	10	84	101	5.55908e-06	SLC45A2
cg10960681	81	59	0	0	18	54	5.61956e-06	TTLL12
cg16315992	82	60	0	2	17	51	5.63774e-06	DDX5
cg10899301	0	9	35	64	64	40	5.66207e-06	TFAP2A
cg25545323	9	2	0	16	90	95	5.73828e-06	MCF2L
cg23674169	60	33	0	1	39	79	5.81721e-06	MUM1
cg14689338	23	13	0	18	76	82	5.85098e-06	MYO10
cg00224202	0	0	43	84	56	29	6.00973e-06	NHSL1
cg26841647	85	65	0	1	14	47	6.02458e-06	BAIAP2
cg25746134	0	20	29	29	70	64	6.22175e-06	PTPN7
cg24045212	42	83	0	0	57	30	6.39008e-06	MAD1L1
cg00461882	57	30	0	0	42	83	6.39008e-06	NUDT1
cg05816157	57	30	0	0	42	83	6.39008e-06	CYB5R1
cg18876602	0	0	0	18	99	95	6.51689e-06	CAP2
cg00982799	0	0	0	18	99	95	6.51689e-06	PTPRE
cg07618085	0	0	0	18	99	95	6.51689e-06	TBC1D16
cg14323928	1	0	0	18	98	95	6.51689e-06	TRPM1
cg23288103	1	0	0	18	98	95	6.51689e-06	BOK
cg18138202	39	14	0	1	60	98	6.58409e-06	KRBA1
cg07733851	0	12	20	41	79	60	6.67433e-06	NR3C1
cg04773926	96	86	0	0	3	27	6.78192e-06	TTYH3
cg04405704	0	0	3	27	96	86	6.78192e-06	HCP5
cg05933408	96	86	0	0	3	27	6.78192e-06	NCLN
cg17494772	96	86	0	0	3	27	6.78192e-06	FBXL18
cg18206768	86	67	0	0	13	46	6.87088e-06	BRAT1
cg05861879	11	43	0	0	88	70	6.88247e-06	NUDT1
cg08596595	16	51	0	0	83	62	6.94673e-06	ATHL1
cg22324696	21	3	0	3	78	107	7.04031e-06	WIPI2
cg16606731	0	1	0	17	99	95	7.13982e-06	SYNE1
cg14968482	46	20	0	0	53	93	7.21495e-06	ALOX5
cg19743666	39	78	0	2	60	33	7.24353e-06	YPEL5
cg13280041	18	10	0	18	81	85	7.24626e-06	NHSL1
cg00394021	1	9	45	77	53	27	7.2529e-06	SLC26A2
cg11528914	0	17	27	15	72	81	7.56218e-06	LCP2
cg23565821	0	0	71	107	28	6	7.57113e-06	CUTA
cg27240008	18	2	0	5	81	106	7.71233e-06	MBP
cg19476082	95	84	0	0	4	29	7.77325e-06	EIF3B
cg20519577	28	67	0	0	71	46	8.10614e-06	MMP17
cg04153882	75	109	0	0	24	4	8.21494e-06	WIPI2
cg24431515	75	109	0	0	24	4	8.21494e-06	ATHL1
cg22891191	0	5	0	14	99	94	8.25268e-06	PTPRE
cg16609181	35	12	0	4	64	97	8.39655e-06	HMHA1
cg27278086	0	3	23	4	76	106	8.43837e-06	ARHGAP25
cg21697381	0	4	31	66	68	43	8.49246e-06	SLFN12
cg15495288	82	61	0	0	17	52	8.51017e-06	USP35
cg12242086	0	13	3	14	96	86	8.52376e-06	EN2
cg03032025	29	9	0	7	70	97	8.5548e-06	CPEB4
cg16857548	19	54	0	1	80	58	8.55592e-06	LPIN2
cg13260377	91	76	0	0	8	37	8.73847e-06	PRRC2A
cg13853198	0	17	1	3	98	93	8.98116e-06	FCER1G
cg18240390	0	0	64	102	35	11	8.98631e-06	NXT2
cg14780990	33	73	0	0	66	40	9.05047e-06	FAM174B
cg09809402	77	54	0	0	22	59	9.42876e-06	FARP1
cg22839308	0	6	54	29	45	78	1.00562e-05	TLR1
cg14035238	0	0	53	27	46	86	1.01129e-05	WIPF1
cg12052497	18	53	0	0	81	60	1.03396e-05	LPIN2
cg03755158	81	60	0	0	18	53	1.03396e-05	IRF7
cg00771593	84	64	0	0	15	49	1.05251e-05	ATP6V0D1
cg20880499	2	24	0	0	97	89	1.0615e-05	TAP1
cg20945738	0	4	77	54	22	55	1.06274e-05	TNFSF13B
cg26149887	47	22	0	4	52	87	1.0798e-05	ABCD1
cg19262476	8	36	0	1	91	76	1.08081e-05	KIAA1522
cg09937438	1	19	1	5	97	89	1.09052e-05	C7orf50
cg19140335	30	8	0	1	69	104	1.09917e-05	TBC1D16
cg16652747	2	19	0	6	97	88	1.10068e-05	STK32C
cg00025496	36	15	0	8	63	90	1.11491e-05	ABR
cg19280364	38	14	0	2	61	97	1.12155e-05	ADPGK
cg14069412	44	84	0	0	55	29	1.14128e-05	TXNDC15
cg23978657	0	7	52	28	47	78	1.14252e-05	GBP4
cg04302388	6	0	0	12	93	101	1.18136e-05	SLC45A2
cg16555388	0	0	75	52	24	61	1.19338e-05	TNFSF10
cg27423445	0	10	0	9	99	94	1.19825e-05	APOLD1
cg22614759	0	15	4	0	95	98	1.20182e-05	ARHGDIB
cg18915099	69	44	0	1	30	68	1.21343e-05	HEXDC
cg12691651	0	0	63	101	36	12	1.26883e-05	ADPGK
cg15243034	16	50	0	0	83	63	1.28671e-05	USP35
cg15954031	57	95	0	1	42	17	1.2965e-05	MYO10
cg03753611	0	0	0	17	99	96	1.33942e-05	ABCD1
cg24535475	0	0	0	17	99	96	1.33942e-05	C1S
cg19577206	1	0	0	17	98	96	1.33942e-05	C2
cg26025224	1	0	0	17	98	96	1.33942e-05	MRPS11
cg08523384	0	8	8	29	91	76	1.34391e-05	NDFIP1
cg00286701	94	82	0	0	5	31	1.35106e-05	BRAT1
cg06804564	0	19	20	20	79	74	1.35281e-05	LRRC8C
cg06990110	1	14	18	39	80	60	1.37746e-05	C11orf58
cg05894797	0	0	85	113	14	0	1.38677e-05	PSEN2
cg04956511	0	18	4	4	95	91	1.42215e-05	PTPN6
cg03438552	0	1	2	23	97	89	1.43158e-05	TAP2
cg06588876	28	7	0	0	71	106	1.44083e-05	C9orf69
cg06577710	0	12	9	1	90	100	1.47526e-05	HCLS1
cg19253850	6	8	0	18	93	87	1.4802e-05	PTPRE
cg18233810	95	85	0	0	4	28	1.4853e-05	WRAP53
cg12028842	99	96	0	1	0	16	1.48577e-05	CCNE1
cg22908581	0	1	0	16	99	96	1.48577e-05	CD4
cg08309251	0	0	26	63	73	50	1.49022e-05	ITGB2
cg08691775	0	1	1	20	98	92	1.49959e-05	NDRG1
cg00109923	98	92	0	0	1	21	1.49959e-05	C7orf26
cg20823977	0	18	29	34	70	61	1.50243e-05	FAM174B
cg16662821	0	1	21	56	78	56	1.54437e-05	SFRP1
cg10853566	0	0	21	57	78	56	1.54437e-05	SLC7A7
cg00658161	78	56	0	0	21	57	1.54437e-05	PTK2B
cg05341539	0	12	46	27	53	74	1.55069e-05	AKAP13
cg19241468	0	2	92	78	7	33	1.56415e-05	PARP14
cg10082662	92	78	0	2	7	33	1.56415e-05	NR1H3
cg21830221	6	32	4	1	89	80	1.60416e-05	HIVEP3
cg14531026	79	59	1	0	19	54	1.60497e-05	EIF4G1
cg10099957	91	77	0	0	8	36	1.62427e-05	SLC7A5
cg13868216	13	0	0	2	86	111	1.62605e-05	BAIAP2L2
cg02868976	0	11	5	19	94	83	1.64487e-05	ITSN2
cg00238353	27	18	0	17	72	78	1.64526e-05	PTPRE
cg25307724	72	49	0	0	27	64	1.65604e-05	MCF2L
cg09031938	14	46	0	0	85	67	1.66075e-05	PDCD1
cg06706029	8	4	0	17	91	92	1.66588e-05	MC1R
cg10411146	78	110	0	0	21	3	1.68106e-05	ATHL1
cg06753281	0	0	37	76	62	37	1.72375e-05	KCNAB2
cg00187503	28	8	0	5	71	100	1.73785e-05	MBP
cg12643083	0	3	22	55	77	55	1.74212e-05	FCGR2A
cg05817709	0	5	47	23	52	85	1.76001e-05	RARRES3
cg15374686	0	6	0	12	99	95	1.78784e-05	SLC6A17
cg11453837	0	15	0	2	99	96	1.82725e-05	PSMB8
cg21990700	0	18	15	19	84	76	1.83742e-05	C1RL
cg09380067	7	34	0	0	92	79	1.93183e-05	FAM83H
cg12745145	92	79	0	0	7	34	1.93183e-05	MAD1L1
cg17194270	23	58	0	1	76	54	1.94184e-05	SYNGR1
cg00731395	66	42	0	0	33	71	1.96756e-05	WIPI2
cg04144533	1	18	0	3	98	92	1.96782e-05	RASSF5
cg12093662	0	10	19	5	80	98	2.0045e-05	ARHGAP25
cg26696870	37	25	0	16	62	72	2.08811e-05	BAIAP2
cg13690241	97	90	0	0	2	23	2.11838e-05	DOK1
cg00279406	0	0	45	84	54	29	2.12939e-05	ITPKB
cg16624069	7	2	0	15	92	96	2.16625e-05	DOCK9
cg16118089	0	0	24	60	75	53	2.16803e-05	AACS
cg06389703	93	81	0	0	6	32	2.26275e-05	DNAAF5
cg12700039	8	1	0	12	91	100	2.31389e-05	TBC1D16
cg09619786	0	0	67	103	32	10	2.32939e-05	RPP25
cg00053927	10	1	0	10	89	102	2.33553e-05	MCF2L
cg04244970	0	8	5	22	94	83	2.34994e-05	SLAMF7
cg16875554	88	72	0	0	11	41	2.37057e-05	CD4
cg24026212	64	101	0	0	35	12	2.38798e-05	MS4A6A
cg02556655	0	0	41	17	58	96	2.41316e-05	FERMT3
cg07260333	40	17	0	4	59	92	2.43688e-05	TUBB3
cg18610205	0	15	1	4	98	94	2.49771e-05	BIN2
cg12710152	0	16	7	3	92	94	2.5026e-05	LCK
cg19143990	0	0	50	25	49	88	2.51736e-05	LYSMD2
cg15740385	96	88	0	0	3	25	2.56732e-05	HEXDC
cg23166857	0	14	0	4	99	95	2.59974e-05	TNFRSF4
cg03730946	4	4	0	17	95	92	2.60561e-05	DENND1C
cg09575242	94	83	0	1	5	29	2.60677e-05	UCHL1
cg13442966	17	3	0	7	82	103	2.66935e-05	MBP
cg04821942	18	4	0	9	81	100	2.69668e-05	DOCK9
cg00480331	0	2	43	80	56	31	2.7211e-05	BCL6
cg18830527	0	0	0	16	99	97	2.74309e-05	CD8A
cg24268161	0	0	0	16	99	97	2.74309e-05	SYNGR1
cg10584914	0	0	0	16	99	97	2.74309e-05	MCF2L
cg06407482	99	97	0	0	0	16	2.74309e-05	NDUFV1
cg05299836	0	16	0	0	99	97	2.74309e-05	BCKDK
cg07604117	1	0	0	16	98	97	2.74309e-05	SYNE1
cg09937642	71	48	0	0	28	65	2.78215e-05	FLAD1
cg09472600	4	27	0	0	95	86	2.81468e-05	NCF2
cg08625693	88	72	0	2	11	39	2.84476e-05	DLG3
cg13456138	4	24	2	9	93	80	2.86427e-05	FAS
cg13807343	26	6	0	0	73	107	2.94593e-05	MCF2L
cg18073514	26	6	0	1	73	106	2.94593e-05	HMHA1
cg15867652	90	75	0	3	9	35	2.96007e-05	BAIAP2
cg04218209	85	68	0	0	14	45	2.97641e-05	CHAC1
cg15175716	91	78	0	0	8	35	2.98906e-05	CCDC88B
cg16386781	91	78	0	0	8	35	2.98906e-05	PPRC1
cg25461186	0	1	0	15	99	97	3.08458e-05	MLXIP
cg27489373	1	20	0	0	98	93	3.08991e-05	CLCN7
cg26768605	98	93	0	0	1	20	3.08991e-05	WDR81
cg13728069	98	93	0	0	1	20	3.08991e-05	NSMF
cg11498582	5	18	0	11	94	84	3.0937e-05	MDC1
cg09642378	14	5	0	14	85	94	3.09459e-05	ARHGAP12
cg12798338	0	16	4	7	95	90	3.11529e-05	TMC6
cg16900671	22	57	0	0	77	56	3.14253e-05	TRPM1
cg22936253	6	31	0	1	93	81	3.1473e-05	FAS
cg12560128	0	0	87	71	12	42	3.14758e-05	OAS2
cg11064744	41	79	0	0	58	34	3.19561e-05	PPP3CB
cg09549813	0	0	40	78	59	35	3.20684e-05	CDIP1
cg20959480	86	113	0	0	13	0	3.20893e-05	AACS
cg07492757	0	15	4	1	95	97	3.28347e-05	TFAP2A
cg18581405	0	9	7	0	92	104	3.31044e-05	S1PR4
cg02794695	0	15	12	5	87	93	3.33104e-05	SLA
cg06881914	26	61	0	1	73	51	3.35944e-05	MS4A6A
cg09069694	0	2	81	109	18	2	3.36917e-05	FAM65A
cg00586537	0	2	81	109	18	2	3.36917e-05	FAM65A
cg04791718	16	2	0	5	83	106	3.37108e-05	TBC1D16
cg06995285	67	44	0	0	32	69	3.39903e-05	EIF3B
cg03451178	23	57	0	1	76	55	3.49719e-05	SLC25A12
cg02869708	20	3	0	0	79	110	3.51658e-05	NCLN
cg03844971	0	0	79	110	20	3	3.51658e-05	MLXIP
cg24796554	0	1	20	3	79	109	3.51658e-05	FLI1
cg23922718	0	0	89	75	10	38	3.57817e-05	ITGB3
cg22663933	7	33	0	0	92	80	3.59145e-05	WIPI2
cg16104837	52	29	0	5	47	79	3.60227e-05	PSTPIP1
cg26534425	0	16	2	3	97	94	3.63215e-05	IL18
cg15942562	47	23	0	0	52	90	3.65078e-05	CDCA3
cg03120461	0	16	35	44	64	53	3.66339e-05	TMSB4X
cg15532138	51	27	0	2	48	84	3.66479e-05	CNTROB
cg17972352	65	42	0	0	34	71	3.73017e-05	ALOX5
cg24071064	15	46	0	0	84	67	3.80881e-05	RNF166
cg15477363	0	11	17	5	82	97	3.89387e-05	ARHGAP25
cg09270434	31	15	0	11	68	87	3.97977e-05	UCHL1
cg26057751	0	8	0	9	99	96	4.03868e-05	CD8A
cg21282054	0	17	7	8	92	88	4.05559e-05	TMC6
cg08243524	0	16	3	4	96	93	4.06545e-05	DENND1C
cg23209878	48	24	0	0	51	89	4.0818e-05	MCF2L
cg20458668	97	91	0	0	2	22	4.1976e-05	TECPR2
cg21505571	85	69	0	8	14	36	4.23185e-05	DDX5
cg20410995	0	0	83	65	16	48	4.24283e-05	GBP4
cg13024471	93	82	0	0	6	31	4.2586e-05	NOS3
cg17777228	93	82	0	0	6	31	4.2586e-05	GEMIN4
cg13629753	0	0	93	82	6	31	4.2586e-05	GBP2
cg15817130	20	16	0	17	79	80	4.33954e-05	MYO10
cg07119472	0	16	3	2	96	95	4.4261e-05	BIN2
cg12414862	90	77	0	0	9	36	4.43782e-05	MLXIP
cg08365687	49	25	0	1	50	87	4.55031e-05	NT5DC2
cg08279075	0	11	40	61	59	41	4.57481e-05	IRX3
cg09517019	0	15	13	21	86	77	4.58399e-05	ARHGEF6
cg25693349	0	15	1	2	98	96	4.63796e-05	PSMB8
cg01437515	0	5	7	28	92	80	4.84615e-05	TNFRSF4
cg22693806	0	15	32	43	67	55	4.92569e-05	PRRX1
cg14722070	96	89	0	0	3	24	4.93747e-05	PRRC2A
cg16187659	0	2	93	82	6	29	4.96553e-05	IFITM2
cg09285525	94	84	0	0	5	29	4.97693e-05	SLC7A5
cg24787755	0	16	6	4	93	93	5.02383e-05	HHEX
cg22801799	0	16	6	4	93	93	5.02383e-05	SLA
cg13037895	82	64	0	0	17	49	5.04593e-05	MAD1L1
cg00490406	0	16	33	25	66	72	5.058e-05	AIM2
cg18998365	0	10	1	10	98	93	5.19163e-05	NR3C1
cg23122899	27	62	0	0	72	51	5.21563e-05	WIPI2
cg10559416	0	17	29	27	70	69	5.25798e-05	CYTIP
cg02963973	70	48	0	0	29	65	5.27316e-05	TEAD3
cg20544852	86	70	0	1	13	42	5.29185e-05	TRIM27
cg06818532	0	14	66	52	33	47	5.29523e-05	BBX
cg17899476	94	85	0	0	5	28	5.30518e-05	SUPT5H
cg00680551	0	17	33	33	66	63	5.36972e-05	NCALD
cg14026109	90	77	0	1	9	35	5.42646e-05	MICAL1
cg16573836	91	79	0	0	8	34	5.4447e-05	MAD1L1
cg10463419	91	79	0	0	8	34	5.4447e-05	C2
cg02016764	1	19	5	9	93	85	5.46768e-05	TLR1
cg09233429	6	1	0	13	93	99	5.53493e-05	PLCB2
cg18350520	99	98	0	0	0	15	5.59923e-05	CLUH
cg15032615	0	15	0	0	99	98	5.59923e-05	RABL6
cg25787131	99	98	0	0	0	15	5.59923e-05	WIPI2
cg02992296	99	98	0	0	0	15	5.59923e-05	INTS1
cg20097219	0	0	0	15	99	98	5.59923e-05	TBC1D16
cg07716089	99	98	0	0	0	15	5.59923e-05	PEMT
cg11982252	99	98	0	0	0	15	5.59923e-05	LZTR1
cg00823993	87	72	0	0	12	41	5.65721e-05	ATP11A
cg03507241	0	7	44	72	55	34	5.71097e-05	TUBB6
cg16520815	71	50	0	0	28	63	5.71994e-05	MGRN1
cg09142829	0	8	0	8	99	97	5.8e-05	CLEC4A
cg08991742	0	2	49	26	50	85	5.86626e-05	ARHGAP25
cg05462543	0	0	39	76	60	37	5.89074e-05	EN2
cg08041014	1	16	0	4	98	93	5.97198e-05	VAT1
cg14372792	1	16	0	4	98	93	5.97198e-05	FAM174B
cg26154631	66	44	0	0	33	69	6.34606e-05	AOAH
cg16535788	66	44	0	0	33	69	6.34606e-05	HEXDC
cg09709079	89	76	0	0	10	37	6.35716e-05	C1S
cg09596975	2	0	0	14	97	99	6.36527e-05	CDK2
cg10244222	72	51	0	1	27	61	6.44073e-05	DDX5
cg23104816	92	81	0	0	7	32	6.60827e-05	ABCF1
cg04132472	84	68	0	0	15	45	6.66848e-05	AKAP10
cg13922935	98	95	0	0	1	18	6.69654e-05	SNAP23
cg15957959	98	95	0	0	1	18	6.69654e-05	AKT1
cg10950593	12	39	0	2	87	72	6.78077e-05	CYTH3
cg18200150	24	58	0	0	75	55	6.84726e-05	MYO1D
cg14563196	0	0	75	55	24	58	6.84726e-05	GBP4
cg19312356	43	21	0	4	56	88	6.90938e-05	CD84
cg12392104	0	5	15	2	84	106	6.98688e-05	CCPG1
cg03400374	0	0	80	110	19	3	7.26865e-05	KCNAB2
cg09956615	0	0	80	110	19	3	7.26865e-05	TTYH3
cg00929860	87	113	0	0	12	0	7.37685e-05	SPOCK2
cg17284531	0	16	12	15	87	82	7.40755e-05	VAV1
cg05130485	0	10	69	52	30	51	7.55486e-05	CASP8
cg23646044	87	72	0	1	12	40	7.5761e-05	EFTUD2
cg24264679	6	25	30	46	63	42	7.65574e-05	DLG3
cg16720890	88	74	0	0	11	39	7.78703e-05	PDCD1
cg26117023	0	3	16	2	83	108	7.91179e-05	DOK1
cg03041532	16	2	0	3	83	108	7.91179e-05	IL18BP
cg06218285	16	2	0	3	83	108	7.91179e-05	CD40
cg27147785	0	0	90	78	9	35	7.93474e-05	OAS2
cg21031128	0	13	4	12	95	88	7.97955e-05	DOK2
cg12604162	0	0	72	105	27	8	8.08341e-05	KCNAB2
cg11796996	0	5	32	62	67	46	8.18094e-05	TAPBP
cg24016995	24	6	0	2	75	105	8.20201e-05	PTPRE
cg26690334	0	0	84	112	15	1	8.20685e-05	CLCN7
cg01612292	84	112	0	0	15	1	8.20685e-05	FAM83H
cg15116368	97	92	0	0	2	21	8.25561e-05	CLCN7
cg03079771	83	67	0	0	16	46	8.31628e-05	C2
cg10209087	0	0	83	67	16	46	8.31628e-05	DDX60L
cg16026922	0	4	11	35	88	74	8.36114e-05	UCHL1
cg10493436	35	68	0	3	64	42	8.41213e-05	ADAMTS4
cg11346248	0	4	46	78	53	31	8.46859e-05	SLFN12
cg20474675	3	1	0	14	96	98	8.47535e-05	C11orf58
cg10496150	20	5	0	6	79	102	8.90724e-05	TBC1D16
cg00126698	28	62	0	1	71	50	8.92084e-05	BTK
cg15032098	0	13	7	16	92	84	9.00816e-05	UCHL1
cg03815917	20	4	0	2	79	107	9.17381e-05	MED15
cg09130535	0	15	7	4	92	94	9.20063e-05	ADRBK1
cg11691298	0	6	19	44	80	63	9.31455e-05	GAREML
cg01250280	96	90	0	0	3	23	9.41931e-05	PA2G4
cg25626298	96	90	0	0	3	23	9.41931e-05	AACS
cg21110795	78	60	0	0	21	53	9.44138e-05	INTS1
cg01658259	0	0	59	95	40	18	9.54188e-05	NFATC4
cg25839227	0	2	3	22	96	89	9.54609e-05	ABI3
cg04142692	94	86	0	0	5	27	9.70118e-05	NDUFV1
cg09761080	0	12	6	1	93	100	9.79978e-05	LST1
cg03886558	18	12	0	15	81	86	9.82004e-05	ARHGAP9
cg11940177	0	3	17	45	82	65	9.82445e-05	PGAM1
cg18909903	10	0	0	3	89	110	9.82481e-05	WDR81
cg04955791	25	16	0	14	74	83	9.83601e-05	SYNE1
cg03802486	95	88	0	0	4	25	9.8534e-05	C1RL
cg07560587	95	88	0	0	4	25	9.8534e-05	BANP
cg24324628	33	16	0	8	66	89	0.000102046	NHSL1
cg19566405	0	7	51	78	48	28	0.000103109	SLFN12
cg19688761	29	29	0	16	70	68	0.000104267	PTPRE
cg20917083	0	0	59	37	40	76	0.00010571	ARHGDIB
cg22285438	59	37	0	0	40	76	0.00010571	ABR
cg19287817	62	40	0	0	37	73	0.00010598	BRD4
cg06385227	0	8	43	68	56	37	0.000106931	EN2
cg04716530	3	19	0	5	96	89	0.000107122	ITGAL
cg11629220	59	91	0	3	40	19	0.000107218	HMHA1
cg22168987	13	1	0	4	86	108	0.00011026	SLC4A2
cg14182690	0	6	1	13	98	94	0.000111361	RUNX3
cg06801852	81	64	0	3	18	46	0.00011321	JAG2
cg08188886	0	1	0	14	99	98	0.000113946	JAG2
cg13220900	0	1	0	14	99	98	0.000113946	DEF6
cg26662727	1	0	0	14	98	99	0.000113946	ZNF749
cg13033722	0	1	0	14	99	98	0.000113946	PTK7
cg01681525	0	0	0	14	99	99	0.000113946	BAHCC1
cg13944685	0	0	0	14	99	99	0.000113946	IL18BP
cg17518965	0	14	0	0	99	99	0.000113946	S1PR4
cg01500402	0	0	0	14	99	99	0.000113946	MLST8
cg15698795	0	14	0	0	99	99	0.000113946	TBC1D10C
cg18331855	0	14	34	45	65	54	0.000114054	ABR
cg08363067	2	20	0	1	97	92	0.000115956	ABCC1
cg14484145	0	0	75	56	24	57	0.000119019	CD74
cg24438178	92	82	0	0	7	31	0.000120303	CCDC88B
cg11045746	1	11	1	11	97	91	0.000122108	FAM26F
cg06417460	0	13	2	6	97	94	0.000122109	CD5
cg12048225	0	15	4	5	95	93	0.000122476	PSMB8
cg23009123	0	3	67	46	32	64	0.00012252	HHEX
cg16472369	0	13	3	1	96	99	0.000124537	ARRB2
cg11248189	32	16	0	9	67	88	0.000124901	UBAP2L
cg10576151	13	41	0	0	86	72	0.000127594	LRRC8C
cg16406708	98	96	0	0	1	17	0.000130308	UCHL1
cg08044140	98	96	0	0	1	17	0.000130308	ERMARD
cg09365542	98	96	0	0	1	17	0.000130308	PRRC2A
cg17102199	98	96	0	0	1	17	0.000130308	DNAAF5
cg05306109	0	0	1	17	98	96	0.000130308	ITPKB
cg12001630	98	96	0	0	1	17	0.000130308	RAC1
cg14464245	1	0	0	13	98	100	0.000131166	AGPAT2
cg00390511	23	35	0	13	76	65	0.000133115	AOAH
cg04347708	13	3	0	9	86	101	0.000135742	FLI1
cg23835646	1	14	0	5	98	94	0.000136481	LGALS2
cg04066885	0	0	79	109	20	4	0.000139525	SH3BP4
cg25708364	1	16	0	2	98	95	0.000139797	FAM83G
cg01726775	0	0	79	62	20	51	0.00013994	C1RL
cg08998192	0	0	20	51	79	62	0.00013994	TAP2
cg16697977	54	32	0	0	45	81	0.000142735	CAPN1
cg02875879	93	84	0	0	6	29	0.000146071	LARP7
cg02951514	2	2	0	14	97	97	0.000148173	SLA
cg13549444	0	14	2	2	97	97	0.000148173	PTPN6
cg18315103	0	1	81	109	18	3	0.000148385	FAM65A
cg00761242	22	6	0	3	77	104	0.000148435	WIPI2
cg23840493	82	66	0	0	17	47	0.00015464	FLAD1
cg14210811	82	66	0	0	17	47	0.00015464	GTF3C2
cg12435134	11	22	0	12	88	79	0.00015522	NAAA
cg20998791	0	5	0	10	99	98	0.000156579	TAPBP
cg06491405	19	49	0	1	80	63	0.000156737	C2
cg08288130	0	14	2	4	97	95	0.000158507	DOK2
cg12314335	5	2	0	13	94	98	0.000159562	MCF2L
cg02426464	0	0	21	52	78	61	0.000160815	SLC43A2
cg08278290	97	93	0	0	2	20	0.000161086	BANP
cg01254505	0	0	97	93	2	20	0.000161086	BST2
cg07443074	7	2	0	12	92	99	0.000164402	MCF2L
cg08993103	82	67	0	6	17	40	0.000167081	SEL1L3
cg20350518	0	1	88	112	11	0	0.000168494	WIPF3
cg17208427	0	0	88	113	11	0	0.000168494	CDH3
cg04784101	0	7	44	70	55	36	0.000169446	RHOD
cg24548564	0	0	69	49	30	64	0.000169452	CD74
cg27298603	93	84	0	2	6	27	0.000170806	WIPI2
cg04091712	49	27	0	0	50	86	0.000170863	CDIP1
cg02345747	0	12	0	3	99	98	0.000170903	LAMP3
cg22627406	0	12	0	3	99	98	0.000170903	C19orf38
cg12363726	91	81	0	0	8	32	0.000175014	BAIAP2
cg27453644	0	0	5	26	94	87	0.000175755	ABCD1
cg26685246	0	0	31	65	68	48	0.000176601	TAP2
cg05916757	81	65	0	0	18	48	0.000179354	STX4
cg03429689	64	98	0	0	35	15	0.000179658	FAM174B
cg19577377	4	24	0	0	95	89	0.000181941	MCF2L
cg05660160	95	89	0	0	4	24	0.000181941	UBALD1
cg19412007	95	89	0	0	4	24	0.000181941	PSMB9
cg16218477	95	89	0	0	4	24	0.000181941	C7orf50
cg21733560	70	51	0	0	29	62	0.000182322	NUDT1
cg10651637	0	0	41	76	58	37	0.000186025	SORD
cg06085905	76	58	0	0	23	55	0.000186823	HEXDC
cg07253191	0	0	23	55	76	58	0.000186823	APIP
cg20943084	0	5	17	41	82	67	0.000189967	CD14
cg12510708	0	14	3	3	96	96	0.000190265	NFE2L3
cg14423692	0	0	66	100	33	13	0.000191088	BCAN
cg03422895	89	78	0	0	10	35	0.000194325	CLUH
cg22978515	26	21	1	18	72	74	0.000196277	EIF4G1
cg26376518	0	0	59	94	40	19	0.00019716	NXT2
cg02622809	84	70	0	0	15	43	0.000197278	MCF2L
cg08898653	0	14	19	26	80	73	0.000200804	CAMK2N1
cg12090003	0	4	67	48	32	61	0.000201189	BST2
cg19763230	0	1	14	41	85	71	0.0002025	PPFIA3
cg13193455	0	2	68	99	31	12	0.000203976	POU3F1
cg00766497	21	6	0	4	78	103	0.000204581	MAD1L1
cg14331206	24	8	0	5	75	100	0.000209944	TBC1D16
cg14359052	0	15	20	20	79	78	0.000215438	PRDM1
cg03903296	7	30	0	0	92	83	0.000216603	PDCD1
cg08328483	0	6	10	29	89	78	0.000222561	BCKDK
cg06640822	0	6	1	12	98	95	0.000223633	RUNX3
cg22569587	0	0	54	89	45	24	0.000223639	GPR143
cg11017065	0	10	65	83	34	20	0.000225498	FLI1
cg20407834	63	47	0	9	36	57	0.000226014	PTPRE
cg22002629	97	93	0	1	2	19	0.000228748	RBPJ
cg02537616	97	93	0	1	2	19	0.000228748	WDR81
cg09557991	0	10	24	12	75	91	0.000230893	TNFRSF1B
cg18505752	0	13	0	1	99	99	0.000231244	PSMB8
cg07770777	0	13	0	1	99	99	0.000231244	ATP11A
cg09774917	0	13	0	0	99	100	0.000231244	TFAP2A
cg10191002	0	13	0	0	99	100	0.000231244	LAG3
cg26548187	99	100	0	0	0	13	0.000231244	NCLN
cg26972614	0	0	0	13	99	100	0.000231244	IL18BP
cg15331996	0	13	0	0	99	100	0.000231244	SPOCK2
cg16521633	99	100	0	0	0	13	0.000231244	SMARCA4
cg13516541	99	100	0	0	0	13	0.000231244	AKT1
cg21320768	0	14	17	12	82	87	0.000234609	PHF11
cg00554250	0	7	0	7	99	99	0.000236215	NR1H3
cg11641102	0	6	15	3	84	104	0.000236363	PTK2B
cg19463256	20	50	0	0	79	63	0.00023709	CCDC8
cg10983208	0	8	25	11	74	94	0.000239453	SPOCK2
cg14351425	0	5	61	42	38	66	0.000242007	GRK5
cg09158821	11	3	0	10	88	100	0.000243813	SLC43A2
cg15550049	98	97	0	0	1	16	0.000252019	LIG1
cg13781956	0	0	1	16	98	97	0.000252019	TNC
cg16363586	0	14	35	29	64	70	0.000256104	BST2
cg01675953	3	1	0	12	96	100	0.000259172	MCF2L
cg20148727	88	77	0	0	11	36	0.000261493	INTS1
cg24874254	0	14	13	17	86	82	0.000263314	PRDM1
cg19880119	93	85	0	0	6	28	0.000265981	NT5DC2
cg15714074	93	85	0	0	6	28	0.000265981	HK3
cg02369028	93	85	0	0	6	28	0.000265981	MUM1
cg12230883	93	85	0	0	6	28	0.000265981	EIF4G1
cg26758340	26	8	0	1	73	104	0.000265981	SLC38A7
cg10252600	55	34	0	1	44	78	0.000267227	TARBP2
cg26040060	80	64	0	1	19	48	0.000268619	CYTH1
cg07044422	0	2	0	12	99	99	0.000269981	NFAM1
cg16352928	0	12	0	2	99	99	0.000269981	LAG3
cg23054840	0	12	0	2	99	99	0.000269981	ALOX5
cg15388107	4	2	0	13	95	98	0.000270058	AOAH
cg12735254	1	13	0	5	98	95	0.000272145	STK32C
cg02485462	85	72	0	0	14	41	0.000272999	ABR
cg14505694	10	1	0	6	89	106	0.000273441	TBC1D16
cg06023570	0	1	80	108	19	4	0.000274605	RNF144A
cg18871289	0	0	80	109	19	4	0.000274605	TTYH2
cg18334727	49	30	0	5	50	78	0.000275075	FBXL5
cg02048416	0	8	5	0	94	105	0.00027646	DOK1
cg17607231	0	8	5	0	94	105	0.00027646	SP110
cg27208925	2	12	0	8	97	93	0.000281006	IRF8
cg23204746	69	50	0	0	30	63	0.000289231	JAG2
cg13248581	48	27	0	1	51	85	0.000291438	CECR1
cg08415592	0	13	4	8	95	92	0.000297837	APOL1
cg18892169	0	1	81	66	18	46	0.000304866	CTSS
cg26898376	90	80	0	1	9	32	0.000308162	CCDC88B
cg23660949	8	31	0	0	91	82	0.000308641	BAIAP2
cg16920407	97	94	0	0	2	19	0.000311676	WRAP53
cg04497717	94	88	0	0	5	25	0.000315388	EIF3B
cg10382497	94	88	0	0	5	25	0.000315388	KIFC1
cg23435118	0	0	36	70	63	43	0.000322595	NDFIP1
cg00750307	63	43	0	1	36	69	0.000322595	NUTF2
cg04804052	4	22	0	2	95	89	0.00032804	SMARCA4
cg26782539	95	90	0	0	4	23	0.000332868	STK32C
cg02724647	15	42	0	0	84	71	0.000333238	CECR5
cg13141061	12	2	0	6	87	105	0.000334008	MBP
cg12163781	96	92	0	0	3	21	0.000334101	MAD1L1
cg10515232	89	79	0	0	10	34	0.000334211	HDAC4
cg15098957	35	16	0	2	64	95	0.000334896	SUPT5H
cg10542562	0	2	2	17	97	94	0.000347025	FLI1
cg26954464	43	23	0	0	56	90	0.000349886	ATP6V0D1
cg26987597	0	4	66	94	33	15	0.000354401	FOXF2
cg21400896	0	3	0	11	99	99	0.000359994	ABI3
cg12492273	53	85	0	2	46	26	0.000365735	MAD1L1
cg00900735	86	112	0	0	13	1	0.000369047	GRB2
cg15719255	0	12	21	13	78	88	0.000370956	LRRC25
cg26536401	35	16	0	0	64	97	0.000372492	CDCA3
cg13453168	0	10	28	16	71	87	0.000377671	PTPRE
cg02941008	0	13	3	3	96	97	0.000380638	CAMK2N1
cg05992079	0	13	3	3	96	97	0.000380638	SIT1
cg18628371	0	13	3	3	96	97	0.000380638	REC8
cg04853708	0	0	89	113	10	0	0.000382424	FBXL18
cg04958157	92	84	0	0	7	29	0.000385542	MCF2L
cg22442557	92	84	0	0	7	29	0.000385542	BAIAP2
cg04482794	0	1	77	106	22	6	0.000389328	ITPKB
cg16661000	0	14	20	19	79	80	0.000389923	HAPLN3
cg03573824	0	0	59	93	40	20	0.000391379	WIPF1
cg01791587	0	0	48	82	51	31	0.00040154	SLC6A17
cg14909730	0	2	63	94	36	17	0.00040319	TFAP2A
cg15821554	89	79	0	1	10	33	0.000407851	SLC25A3
cg27298072	90	81	0	0	9	32	0.000425033	KCNAB2
cg00841725	0	0	11	35	88	78	0.00044264	MCF2L
cg20239565	54	34	0	0	45	79	0.000450857	HEXDC
cg23371584	1	0	49	30	49	83	0.000457497	BTG2
cg13485420	38	19	0	2	61	92	0.000459562	ZDHHC8
cg03067182	85	73	0	0	14	40	0.000460867	INTS1
cg16340268	0	1	79	107	20	5	0.000460973	ITPKB
cg02181847	0	0	69	101	30	12	0.000464492	TFAP2A
cg23329015	71	54	0	0	28	59	0.000466902	ABR
cg23708288	0	0	44	78	55	35	0.000467971	DLG3
cg04846156	0	0	0	12	99	101	0.000468135	TONSL
cg10811945	0	12	0	0	99	101	0.000468135	SH2D2A
cg06164260	0	0	0	12	99	101	0.000468135	BCL6
cg10389771	0	12	0	0	99	101	0.000468135	BCAN
cg16727416	0	0	0	12	99	101	0.000468135	ANKRD9
cg21799246	99	101	0	0	0	12	0.000468135	KIFC1
cg14606321	0	0	0	12	99	101	0.000468135	WDR34
cg05656855	99	101	0	0	0	12	0.000468135	TRIM27
cg05044173	0	12	0	0	99	101	0.000468135	CD4
cg16266790	99	101	0	0	0	12	0.000468135	FOXK1
cg00489699	99	101	0	0	0	12	0.000468135	RABL6
cg20578783	99	100	0	1	0	12	0.000468135	CCDC88B
cg25989075	0	3	66	95	33	15	0.000471219	NHSL1
cg03773805	93	86	0	1	6	26	0.000478566	WDR81
cg23539753	0	0	93	86	6	27	0.000478566	SP100
cg17199181	53	40	0	10	46	63	0.000481064	MBP
cg24498746	98	98	0	0	1	15	0.000484412	CS
cg12614711	98	98	0	0	1	15	0.000484412	INTS1
cg04160694	98	98	0	0	1	15	0.000484412	DBN1
cg12968701	47	27	0	0	52	86	0.000489499	ARHGAP9
cg05913474	15	3	0	4	84	106	0.000498049	FAM83H
cg17235179	0	13	9	6	90	94	0.000500429	CNOT8
cg01993847	72	103	0	0	27	10	0.00050073	TTYH2
cg01998806	27	10	0	1	72	102	0.00050073	CCDC88B
cg22245752	70	53	0	0	29	60	0.000501344	INTS1
cg27475126	0	0	62	95	37	18	0.000501679	CCNE1
cg12484266	93	87	0	0	6	26	0.000503902	C2
cg09440989	93	87	0	0	6	26	0.000503902	MGRN1
cg27641072	93	87	0	0	6	26	0.000503902	INTS1
cg01239870	93	87	0	0	6	26	0.000503902	GTF3C1
cg19789466	0	2	77	61	22	50	0.000512911	OAS1
cg00000714	0	0	84	111	15	2	0.000517401	TSEN34
cg07274406	0	11	13	6	86	96	0.000518274	ITGB2
cg08757862	0	3	52	33	47	77	0.000519385	TLR1
cg16014085	4	14	0	9	95	90	0.000523962	2019-09-01
cg14112356	0	1	7	28	92	84	0.000524397	ITGB2
cg08753403	92	84	0	1	7	28	0.000524397	CLEC2B
cg21105787	0	12	10	17	89	84	0.000527027	SPOCK2
cg27149973	0	0	81	109	18	4	0.000533226	MGAT5B
cg25220769	18	4	0	1	81	108	0.000533226	KCNAB2
cg19227382	91	83	0	0	8	30	0.000538069	C10orf54
cg01144283	91	83	0	0	8	30	0.000538069	TECPR2
cg02772106	0	0	39	72	60	41	0.000546454	ABCD1
cg05080834	45	26	0	3	54	84	0.000547857	GPR143
cg14211735	37	20	0	5	62	88	0.00055219	PSMA4
cg08641278	0	8	4	0	95	105	0.000562043	SPOCK2
cg01765174	0	12	1	2	98	99	0.000563108	TRIM14
cg02363593	28	17	0	10	71	86	0.00056368	DOCK2
cg11952344	23	52	0	0	76	61	0.000565574	HEXDC
cg18708252	0	0	23	52	76	61	0.000565574	CBX7
cg05001964	0	8	43	64	56	41	0.000566466	IRX3
cg03194064	0	3	34	16	65	94	0.00056671	DOK4
cg01647936	0	0	42	23	57	90	0.000591397	FERMT3
cg27587095	42	23	0	0	57	90	0.000591397	HDAC4
cg07825508	0	0	57	90	42	23	0.000591397	BTK
cg00555420	0	11	2	6	97	96	0.000595495	TAPT1
cg08196512	97	95	0	0	2	18	0.000597615	BAIAP2L2
cg13278004	0	0	97	95	2	18	0.000597615	SP140L
cg05667756	97	95	0	0	2	18	0.000597615	BCKDK
cg18653451	0	4	17	40	82	69	0.000597861	CCDC8
cg05863683	95	91	0	0	4	22	0.000603164	MAD1L1
cg18664712	0	0	95	91	4	22	0.000603164	CD74
cg07027613	0	7	7	21	92	85	0.000603709	C1RL
cg06380123	0	11	1	4	98	98	0.000614215	BIN2
cg21099332	0	11	1	4	98	98	0.000614215	FYB
cg07314988	25	55	0	0	74	58	0.00061556	ATHL1
cg06038367	0	12	2	2	97	99	0.000618255	CORO1A
cg10435245	3	20	0	0	96	93	0.000620605	SPI1
cg11317199	5	20	0	5	94	88	0.000632601	TRIM14
cg23685969	2	4	0	12	97	97	0.000633244	ANAPC16
cg07837085	4	10	3	19	92	84	0.000634725	SLAMF7
cg08850675	86	75	0	0	13	38	0.00063707	DAGLB
cg20239604	86	75	0	0	13	38	0.00063707	WIPI2
cg00375250	0	0	71	102	28	11	0.000641601	OLFML2A
cg05892376	0	13	7	9	92	91	0.000642869	ARHGEF6
cg16260696	0	12	5	3	94	98	0.000643353	TBC1D10C
cg01993952	2	6	3	19	94	88	0.000647365	MTUS1
cg15259400	0	0	60	93	39	20	0.000658271	RBM41
cg21389621	5	25	33	38	61	50	0.000664618	TMSB4X
cg08948225	57	38	0	1	42	74	0.000678013	PTK2B
cg13803976	0	3	20	45	79	65	0.000695287	CD8A
cg19579755	75	59	0	2	24	52	0.000697105	FAM26F
cg26283564	1	11	25	43	73	59	0.00070581	SGCE
cg26229224	4	3	0	12	95	98	0.000708243	PKMYT1
cg10262997	0	1	36	67	63	45	0.000725997	SPTY2D1
cg19461260	90	82	0	0	9	31	0.000727028	TRIM14
cg13090671	0	13	59	57	40	43	0.000730537	HCP5
cg13108304	3	5	0	12	96	96	0.000732276	MCF2L
cg15116327	88	79	0	0	11	34	0.000740794	LCK
cg04167833	0	0	88	79	11	34	0.000740794	LCP2
cg02931247	45	26	0	0	54	87	0.000750941	C1RL
cg08845721	25	24	0	13	74	76	0.00076322	NR3C1
cg16746026	85	74	0	0	14	39	0.000768236	ZNF438
cg16325610	0	0	87	112	12	1	0.000773074	PMEL
cg12946660	0	0	87	112	12	1	0.000773074	HNRNPUL1
cg05049329	0	1	45	77	54	35	0.000774308	ITPKB
cg07104135	3	8	1	14	95	91	0.000792865	IPO9
cg07625783	0	12	4	7	95	94	0.000794876	SLAMF8
cg19216792	0	12	4	7	95	94	0.000794876	SKAP2
cg22409504	27	11	0	3	72	99	0.000796265	ABCF1
cg03243362	68	51	0	1	31	61	0.00082865	LCK
cg09329516	31	62	0	0	68	51	0.00082865	SLC43A2
cg23369564	0	11	22	14	77	88	0.000841587	PLEKHO1
cg13580526	0	0	81	68	18	45	0.000844878	ZNF703
cg12193277	41	22	0	1	58	90	0.000844878	CBX7
cg08330690	0	0	63	95	36	18	0.000846687	SLFN12
cg17024258	0	0	75	105	24	8	0.000850368	VANGL2
cg16822572	0	0	75	105	24	8	0.000850368	PIM2
cg01256278	93	87	0	1	6	25	0.000850368	CYTH3
cg16278747	24	8	0	1	75	104	0.000850368	PRRC2A
cg13640200	0	5	35	19	64	89	0.000857067	PCED1B
cg01745370	0	0	90	113	9	0	0.000862579	GCC2
cg08348496	0	0	90	113	9	0	0.000862579	HAPLN3
cg24151352	0	0	90	113	9	0	0.000862579	FOXF2
cg04812347	2	17	0	1	97	95	0.000863233	AIF1
cg14346243	0	0	80	108	19	5	0.000865741	SNCA
cg00440043	0	7	72	59	27	47	0.000868729	ZEB1
cg07788469	52	85	0	0	47	28	0.000870912	STK32C
cg04420309	0	7	45	67	54	39	0.000881137	RHOD
cg06679209	11	33	0	1	88	79	0.000889153	HMHA1
cg09784932	55	37	0	0	44	76	0.000903339	RTN4R
cg01868753	0	0	59	91	40	22	0.000908429	RBM41
cg19411729	0	2	2	16	97	95	0.000908581	CCL5
cg22949562	62	44	0	0	37	69	0.000909289	JAK3
cg23013864	13	7	0	11	86	95	0.000918861	CAP2
cg26218110	0	1	1	14	98	98	0.000925292	BAHCC1
cg22260508	1	14	0	0	98	99	0.000925292	PTPN6
cg03536488	98	99	0	0	1	14	0.000925292	NCLN
cg10949862	91	84	0	0	8	29	0.000926913	SNX1
cg03996106	64	47	0	0	35	66	0.000942471	MYO1D
cg19508107	99	102	0	0	0	11	0.000945627	LZTR1
cg00965578	0	0	0	11	99	102	0.000945627	APOL3
cg03474702	99	102	0	0	0	11	0.000945627	IMPA2
cg12411858	0	0	0	11	99	102	0.000945627	MED15
cg27505036	99	102	0	0	0	11	0.000945627	CLCN7
cg13570169	99	102	0	0	0	11	0.000945627	PMPCA
cg01419914	0	0	0	11	99	102	0.000945627	BAHCC1
cg05211192	99	102	0	0	0	11	0.000945627	MAD1L1
cg17529965	0	0	0	11	99	102	0.000945627	PSTPIP1
cg07026910	80	67	0	1	19	45	0.000950058	INPP5D
cg26282762	89	81	0	0	10	32	0.000955354	MUM1
cg04411449	14	3	0	4	85	106	0.000955923	PA2G4
cg01039401	5	22	0	2	94	89	0.000958939	TEAD4
cg00822030	0	0	5	23	94	90	0.000985654	KCNAB2
cg22355525	94	90	0	0	5	23	0.000985654	TRIM27
cg26987720	74	59	0	0	25	54	0.00100246	BAIAP2
cg04079779	0	0	82	109	17	4	0.00102089	MLST8
cg01816304	0	0	85	111	14	2	0.00102436	PARVA
cg18192083	0	0	85	111	14	2	0.00102436	KCNAB2
cg17119387	0	0	85	111	14	2	0.00102436	CLUH
cg07985164	85	110	0	1	14	2	0.00102436	FAM174B
cg16486109	4	4	0	12	95	97	0.00105521	IRF7
cg20098015	0	2	1	13	98	98	0.00105914	ODF3B
cg03459809	1	13	0	2	98	98	0.00105914	EPHX1
cg08659421	0	2	1	13	98	98	0.00105914	IL32
cg04615850	22	7	0	0	77	106	0.00106004	KDM4B
cg10982113	86	76	0	0	13	37	0.00106115	ABCF1
cg07584494	57	89	0	0	42	24	0.00106187	KDM4B
cg10099364	0	0	20	47	79	66	0.00106338	AHCY
cg11721194	0	3	2	15	97	95	0.00107896	SLAMF7
cg07880384	0	0	4	21	95	92	0.00108196	C2
cg15753916	4	21	0	0	95	92	0.00108196	DUSP14
cg24139895	0	0	66	97	33	16	0.0010857	NXT2
cg17298275	47	58	0	11	52	44	0.00109375	ABR
cg08677954	49	31	0	0	50	82	0.00110239	PRRC2A
cg10552523	0	11	9	5	90	97	0.00111614	IFITM1
cg06952416	0	4	86	76	13	33	0.00113554	NR3C1
cg10501602	0	2	0	10	99	101	0.00114098	NOS3
cg02767068	0	2	0	10	99	101	0.00114098	CORO1A
cg25033767	0	0	49	81	50	32	0.00114104	PTK7
cg00273340	96	94	0	0	3	19	0.00114137	CCDC88B
cg05652817	3	19	0	0	96	94	0.00114137	SPATA20
cg24039102	3	19	0	0	96	94	0.00114137	MMP17
cg04111999	96	94	0	0	3	19	0.00114137	BMI1
cg04263215	22	42	0	6	77	65	0.00115098	ADAMTS4
cg01047635	30	18	0	8	69	87	0.00115533	C11orf58
cg25778479	0	0	84	110	15	3	0.0011653	BZW2
cg27657537	0	0	84	110	15	3	0.0011653	MED15
cg07354440	23	48	0	3	76	62	0.00119082	ADAMTS4
cg09099830	0	1	8	28	91	84	0.00121946	ITGAL
cg15361661	0	0	24	9	75	104	0.00121962	ARHGAP25
cg13470920	0	0	9	30	90	83	0.00122884	VAV1
cg13655563	0	1	58	89	41	23	0.00123735	ABR
cg11525210	34	17	0	0	65	96	0.00124009	CSF1R
cg04407063	17	42	0	0	82	71	0.00126407	ADRBK1
cg14991358	0	0	17	42	82	71	0.00126407	PRCC
cg21585409	22	49	0	0	77	64	0.00131474	WIPI2
cg18515307	0	0	54	86	45	27	0.00131796	DLG3
cg11179518	54	86	0	0	45	27	0.00131796	MPEG1
cg20760427	68	52	0	0	31	61	0.00134173	PRRC2A
cg06528223	26	11	0	3	73	99	0.00135445	DENND1C
cg09918563	79	66	0	1	20	46	0.00135746	MCF2L
cg04545963	0	0	28	12	71	101	0.0013814	NFKBIA
cg24434988	67	51	0	1	32	61	0.00138363	ATHL1
cg24663206	0	0	53	85	46	28	0.00141077	DLG3
cg23717186	1	4	1	13	97	96	0.00142065	ITPKB
cg19357011	81	70	0	0	18	43	0.00146483	KIFC1
cg03916756	81	70	0	0	18	43	0.00146483	BAIAP2
cg23394673	0	0	31	60	68	53	0.00146485	TNFRSF4
cg10864680	0	0	87	78	12	35	0.00146584	TNFSF13B
cg07473175	0	11	29	23	70	79	0.00148277	PCED1B
cg01804528	60	43	0	0	39	70	0.00148366	GDPD5
cg23312425	61	44	0	0	38	69	0.00148393	CCDC88B
cg07673230	21	47	0	1	78	65	0.00148434	LAPTM4B
cg18822703	76	105	0	0	23	8	0.00149139	GRB2
cg15093216	93	89	0	0	6	24	0.00149479	ABR
cg20228788	93	89	0	0	6	24	0.00149479	PTCD1
cg20742009	0	12	7	7	92	94	0.00150423	LAMP3
cg14179806	47	29	0	0	52	84	0.00150744	RRP1
cg02072885	0	8	70	87	29	18	0.00151074	LAMP3
cg26149678	0	8	10	3	89	102	0.00151672	IL18BP
cg19308132	0	3	15	36	84	74	0.0015277	NCALD
cg06809285	87	79	0	0	12	34	0.00153904	IBA57
cg07549381	0	0	25	10	74	103	0.00154163	RNF166
cg00155063	0	10	28	39	71	64	0.00158674	TNFRSF1B
cg05504665	89	82	0	0	10	31	0.00158683	STK32C
cg01150083	0	0	63	94	36	19	0.00158763	GPKOW
cg12854186	0	0	24	51	75	62	0.00159899	TAP2
cg26563583	0	0	88	112	11	1	0.00160484	KIAA0040
cg23314805	0	0	88	112	11	1	0.00160484	MAPK7
cg11908570	0	0	88	112	11	1	0.00160484	KIAA0040
cg02740061	74	60	0	0	25	53	0.00160798	AP5Z1
cg01554457	74	60	0	0	25	53	0.00160798	RFX5
cg07307078	0	4	42	68	57	41	0.00161798	TUBB6
cg06479607	2	16	0	1	97	96	0.00161816	BAIAP2
cg07376381	35	27	3	19	61	67	0.00166774	LCK
cg21155787	0	0	70	100	29	13	0.00168409	RBM41
cg22337605	0	1	70	99	29	13	0.00168409	TNFRSF1B
cg00700487	1	11	0	4	98	98	0.00168947	NOS3
cg15454110	2	15	0	2	97	96	0.00169504	CUTA
cg08641561	73	59	0	0	26	54	0.00171239	VANGL2
cg23968456	94	91	0	0	5	22	0.00171517	C10orf54
cg23535596	0	6	17	34	82	73	0.00171698	TFAP2A
cg17690263	41	24	0	0	58	89	0.00172814	NOS3
cg03431846	0	10	2	1	97	102	0.00173767	REC8
cg25353896	1	13	0	1	98	99	0.00175613	PARVG
cg26107100	98	99	0	1	1	13	0.00175613	CCDC88B
cg03791917	0	0	1	13	98	100	0.00175613	BTK
cg10021238	98	100	0	0	1	13	0.00175613	LARP7
cg10954654	98	100	0	0	1	13	0.00175613	CTSS
cg06786238	76	63	0	1	23	49	0.00175857	KIAA1522
cg19663795	0	8	3	0	96	105	0.00178525	2019-09-01
cg03199564	0	6	59	81	40	26	0.00180656	CYTL1
cg25799590	80	68	0	2	19	43	0.00184033	CXCL10
cg02879223	0	0	57	88	42	25	0.00185151	DLG3
cg11992736	0	3	63	47	36	63	0.00185367	IL12RB1
cg09305948	84	74	0	1	15	38	0.00187203	WIPI2
cg01142596	0	0	78	106	21	7	0.00187977	CDH3
cg12005186	0	1	21	7	78	105	0.00187977	FERMT3
cg23096144	0	10	0	0	99	103	0.00190651	EPHX1
cg18997701	99	103	0	0	0	10	0.00190651	PPP2R5C
cg25325192	0	10	0	0	99	103	0.00190651	TMSB4XP8
cg21834739	99	103	0	0	0	10	0.00190651	PRRC2A
cg00295339	99	103	0	0	0	10	0.00190651	BANP
cg07839371	99	103	0	0	0	10	0.00190651	WIPI2
cg24507519	99	103	0	0	0	10	0.00190651	BRAT1
cg12436568	0	10	0	0	99	103	0.00190651	PTPN7
cg14892570	0	0	0	10	99	103	0.00190651	WIZ
cg11274940	0	0	0	10	99	103	0.00190651	BOK
cg19776366	0	10	0	1	99	102	0.00190651	BAIAP2
cg23364656	0	10	0	1	99	102	0.00190651	PRF1
cg22556143	0	10	0	1	99	102	0.00190651	STK32C
cg05231706	95	93	0	0	4	20	0.00192022	RAC1
cg10126923	0	4	0	7	99	102	0.00192279	NKG7
cg11374732	16	4	0	0	83	109	0.00192571	INPP5D
cg19755459	62	46	0	1	37	66	0.00192842	PLEKHA5
cg16959606	0	0	91	113	8	0	0.00193369	ATP1B1
cg17372223	0	0	91	113	8	0	0.00193369	NT5DC2
cg00654814	0	0	91	113	8	0	0.00193369	MGAT5B
cg07740579	0	0	91	113	8	0	0.00193369	TMC6
cg10981541	0	0	91	113	8	0	0.00193369	FAM57A
cg00430484	8	0	0	1	91	112	0.00193369	BAIAP2L2
cg03065614	8	0	0	1	91	112	0.00193369	TMEM63B
cg00054971	77	75	0	11	22	27	0.00194798	PTPRE
cg00141162	0	4	9	1	90	108	0.00195483	HCLS1
cg16586165	0	0	56	87	43	26	0.00197952	DOCK11
cg03441853	0	0	61	92	38	21	0.00198957	ADPGK
cg00241907	0	10	34	45	65	58	0.00198966	TMSB4X
cg22234061	88	81	0	0	11	32	0.002003	ADRBK1
cg01546378	0	10	57	69	42	34	0.00200372	GALM
cg00582941	13	2	0	0	86	111	0.00200754	AHCY
cg01259619	0	0	86	111	13	2	0.00200754	ITPKB
cg06764092	0	8	1	6	98	99	0.00200802	SLAMF8
cg02698708	47	78	0	0	52	35	0.00201523	MTUS1
cg15989594	92	87	0	1	7	25	0.00201962	FOXRED2
cg22047295	0	1	92	87	7	25	0.00201962	WIPF1
cg24141382	0	3	2	14	97	96	0.00202921	CTPS1
cg26367351	0	2	1	12	98	99	0.00203583	DLG3
cg07236781	17	40	0	2	82	71	0.00204621	RUNX3
cg27357238	53	36	0	0	46	77	0.00207556	STK32C
cg15855671	3	16	0	3	96	94	0.00208542	ARHGEF6
cg11808677	30	18	0	7	69	88	0.00210631	CDCA3
cg27385443	44	27	0	0	55	86	0.00211231	SMARCA4
cg17333767	44	27	0	1	55	85	0.00211231	CECR1
cg23553480	0	11	5	4	94	98	0.0021182	INPP5D
cg13328614	0	11	5	4	94	98	0.0021182	PIM2
cg16164619	0	0	23	9	76	104	0.00212682	ARHGAP9
cg18135206	97	97	0	0	2	16	0.00213209	TECPR2
cg27100266	97	97	0	0	2	16	0.00213209	TRIM27
cg09306188	97	97	0	0	2	16	0.00213209	MGRN1
cg12256038	68	53	0	1	31	59	0.0021366	DNAAF5
cg24658899	0	0	45	76	54	37	0.0021366	DLG3
cg20499861	0	1	67	52	32	60	0.00219835	ZEB1
cg18234130	0	6	17	7	82	100	0.00219991	PTK2B
cg11897736	60	44	0	2	39	67	0.00221582	MCF2L
cg14661234	0	0	2	15	97	98	0.00222736	TNFRSF4
cg10147875	97	98	0	0	2	15	0.00222736	PPFIA3
cg16691898	97	98	0	0	2	15	0.00222736	TMEM79
cg27228868	97	98	0	0	2	15	0.00222736	GLMP
cg22158175	97	98	0	0	2	15	0.00222736	PSMB8
cg25382032	76	64	0	0	23	49	0.0022818	EIF4G1
cg01134144	0	5	7	21	92	87	0.00228228	ARHGEF6
cg20229931	8	4	0	10	91	99	0.0022832	LSS
cg05359853	0	1	50	80	49	32	0.00229393	PPM1H
cg24998110	26	50	0	3	73	60	0.00232164	HEXDC
cg01735398	0	3	4	18	95	92	0.00232283	FAM83G
cg03780271	0	0	65	50	34	63	0.0023238	TAPBP
cg07610853	12	7	0	10	87	96	0.00232511	ATP11A
cg22881174	0	9	0	2	99	102	0.00234357	SFMBT2
cg03190661	0	0	19	6	80	107	0.0023545	TMC6
cg27271532	54	38	0	0	45	75	0.00236323	IRF7
cg08397920	57	41	0	0	42	72	0.00237329	MLST8
cg13104274	53	84	0	0	46	29	0.00239263	ATP1B1
cg03745491	22	11	0	6	77	96	0.00240288	DENND1C
cg03207915	0	1	82	72	17	40	0.00243368	MAN1A1
cg17114584	0	1	4	19	95	93	0.00248139	IRF7
cg18324600	75	63	0	0	24	50	0.00249527	JAG2
cg19928046	0	0	75	63	24	50	0.00249527	CD74
cg02695343	0	10	2	2	97	101	0.00253163	LAG3
cg21573745	93	90	0	0	6	23	0.00253249	LIG1
cg14354418	25	52	0	0	74	61	0.00254024	WIPF3
cg19995856	25	52	0	0	74	61	0.00254024	C14orf159
cg13621396	18	38	0	4	81	71	0.00254315	STIM2
cg00405198	0	6	7	1	92	106	0.00255407	TFAP2A
cg01930719	0	3	0	8	99	102	0.00256239	FAM65A
cg01662869	14	14	0	11	85	88	0.00256767	MGRN1
cg27534599	3	2	0	10	96	101	0.0025702	CECR1
cg14798653	8	2	0	7	91	104	0.00257262	DENND1C
cg12414526	35	19	0	0	64	94	0.00257535	AP5Z1
cg16321975	0	9	5	2	94	102	0.00264401	INPP5D
[truncated: 8,333 more rows]
