# Supplementary material for: Epigenomic and genomic analysis of transcriptome modulation in skin cutaneous melanoma
Source: Aging (Albany NY). 2020 Jul 7;12(13):12703–25. doi: 10.18632/aging.103115 (PMC7377867; doi:10.18632/aging.103115)
Supplement: Supplementary Table 9 [file aging-12-103115-s010..xlsx]

## Sheet: S9_Table
Supplementary Table 9. Differential expression (EXP) genes between iC1 and iC3 subtypes.
TransID	baseMean	log2FoldChange	lfcSE	stat	pvalue	padj
ENSG00000179144.4	921.916	-3.02923	0.152548	-19.8575	9.48392e-88	2.00974e-83
ENSG00000134242.14	386.336	-3.12261	0.157895	-19.7765	4.74474e-87	5.02729e-83
ENSG00000254838.5	513.344	-3.54464	0.184633	-19.1983	3.82262e-82	2.70017e-78
ENSG00000155307.16	596.158	-3.00681	0.158194	-19.0072	1.48808e-80	7.88349e-77
ENSG00000109684.13	46.698	-3.09164	0.163746	-18.8808	1.64202e-79	6.9592e-76
ENSG00000145779.7	1073.79	-2.40894	0.128441	-18.7552	1.75493e-78	6.19811e-75
ENSG00000168405.13	244.906	-2.54256	0.13597	-18.6994	5.00658e-78	1.51563e-74
ENSG00000268027.4	121.387	-3.85167	0.206168	-18.6822	6.91273e-78	1.8311e-74
ENSG00000074706.12	256.221	-3.15945	0.169652	-18.6231	2.08914e-77	4.91901e-74
ENSG00000113532.11	701.879	-2.39875	0.129766	-18.4852	2.71903e-76	5.7619e-73
ENSG00000138378.16	278.836	-2.69036	0.145894	-18.4405	6.21401e-76	1.1971e-72
ENSG00000160219.10	297.786	-2.18604	0.121425	-18.0031	1.84143e-72	3.25181e-69
ENSG00000163519.12	171.395	-3.68902	0.207632	-17.7671	1.27129e-70	2.07231e-67
ENSG00000133574.8	2253.79	-2.45513	0.138584	-17.7159	3.16322e-70	4.78799e-67
ENSG00000196329.9	165.874	-2.79903	0.158744	-17.6324	1.38986e-69	1.96351e-66
ENSG00000174946.6	198.983	-3.27288	0.185979	-17.5981	2.54542e-69	3.37124e-66
ENSG00000081237.17	4821.49	-3.38017	0.19212	-17.5941	2.73589e-69	3.41037e-66
ENSG00000110848.7	382.292	-3.535	0.201061	-17.5817	3.40114e-69	4.00409e-66
ENSG00000183918.13	419.329	-3.44771	0.196367	-17.5575	5.2135e-69	5.8147e-66
ENSG00000042980.11	470.854	-3.13699	0.178814	-17.5434	6.6856e-69	7.08372e-66
ENSG00000173208.3	100.645	-3.45983	0.198934	-17.3918	9.51639e-68	9.60294e-65
ENSG00000259834.1	213.844	-3.63799	0.209722	-17.3468	2.08682e-67	2.01008e-64
ENSG00000162692.9	1809.58	-2.64676	0.152951	-17.3046	4.34318e-67	4.00158e-64
ENSG00000083799.16	2621.54	-1.53444	0.0886926	-17.3007	4.64687e-67	4.10299e-64
ENSG00000227039.5	243.466	-3.28535	0.19	-17.2913	5.47182e-67	4.63813e-64
ENSG00000140030.5	349.098	-2.71815	0.157818	-17.2234	1.77381e-66	1.44572e-63
ENSG00000225783.5	492.872	-3.23793	0.188078	-17.2159	2.01685e-66	1.58293e-63
ENSG00000145416.12	610.454	-2.53907	0.148273	-17.1243	9.78558e-66	7.40594e-63
ENSG00000172673.9	190.521	-3.69535	0.216042	-17.1048	1.36775e-65	9.99449e-63
ENSG00000197057.7	77.7744	-3.57723	0.209185	-17.1008	1.46395e-65	1.03408e-62
ENSG00000164483.15	99.5062	-3.1135	0.182099	-17.0979	1.53912e-65	1.05211e-62
ENSG00000110934.9	919.756	-2.52573	0.147817	-17.0869	1.85914e-65	1.23116e-62
ENSG00000261644.1	26.3495	-2.87371	0.168736	-17.0308	4.8566e-65	3.11867e-62
ENSG00000185862.6	1445.37	-2.43089	0.142948	-17.0054	7.49173e-65	4.66933e-62
ENSG00000205784.2	23.9808	-2.98066	0.175861	-16.9489	1.96098e-64	1.18729e-61
ENSG00000235505.6	111.338	-2.60989	0.154191	-16.9263	2.88062e-64	1.69564e-61
ENSG00000245164.5	277.48	-3.88822	0.230994	-16.8325	1.40973e-63	8.07392e-61
ENSG00000117091.8	1787.73	-2.88898	0.171861	-16.8099	2.06357e-63	1.15077e-60
ENSG00000174255.6	20.5884	-3.73679	0.22306	-16.7524	5.44191e-63	2.95691e-60
ENSG00000158473.6	163.539	-2.40326	0.143506	-16.7467	5.98066e-63	3.14314e-60
ENSG00000173198.5	137.101	-2.6102	0.155872	-16.7458	6.0813e-63	3.14314e-60
ENSG00000115607.8	65.19	-2.85879	0.170742	-16.7433	6.33429e-63	3.19595e-60
ENSG00000139278.8	681.797	-2.19574	0.131272	-16.7267	8.37975e-63	4.12966e-60
ENSG00000122862.4	5155.62	-2.23827	0.13384	-16.7235	8.84301e-63	4.25891e-60
ENSG00000178562.16	391.738	-2.59688	0.156054	-16.6409	3.52377e-62	1.65938e-59
ENSG00000121895.7	134.202	-3.30003	0.198717	-16.6067	6.2319e-62	2.87087e-59
ENSG00000235831.5	62.923	-2.34511	0.141514	-16.5716	1.11875e-61	5.04414e-59
ENSG00000269220.1	45.1306	-2.86684	0.173155	-16.5565	1.43781e-61	6.34765e-59
ENSG00000267121.4	175.497	-2.72828	0.165458	-16.4893	4.38329e-61	1.89564e-58
ENSG00000152784.14	132.538	-2.67483	0.162785	-16.4317	1.13483e-60	4.80962e-58
ENSG00000164136.15	190.515	-2.31125	0.14082	-16.4128	1.54971e-60	6.43919e-58
ENSG00000171115.3	854.722	-2.11817	0.129067	-16.4114	1.58453e-60	6.45727e-58
ENSG00000151702.15	1115.29	-2.09114	0.127454	-16.407	1.70305e-60	6.8093e-58
ENSG00000184293.6	58.4136	-3.00136	0.183326	-16.3717	3.04344e-60	1.17767e-57
ENSG00000009790.13	898.162	-2.87536	0.175632	-16.3715	3.05656e-60	1.17767e-57
ENSG00000172575.10	545.669	-2.6948	0.164705	-16.3613	3.61123e-60	1.36653e-57
ENSG00000105967.14	414.294	-2.89311	0.177584	-16.2915	1.13387e-59	4.21542e-57
ENSG00000163219.10	1370.32	-2.34654	0.144319	-16.2594	1.91614e-59	7.00084e-57
ENSG00000079263.17	620.01	-2.80622	0.172818	-16.238	2.71729e-59	9.75968e-57
ENSG00000179841.8	257.373	-2.98402	0.184246	-16.1959	5.39182e-59	1.9043e-56
ENSG00000109943.7	202.788	-2.97509	0.183927	-16.1754	7.52437e-59	2.61392e-56
ENSG00000168421.11	659.754	-3.04101	0.188093	-16.1676	8.53361e-59	2.9167e-56
ENSG00000234663.4	24.9325	-3.15192	0.194994	-16.1642	9.0222e-59	3.03475e-56
ENSG00000171522.5	492.89	-2.28602	0.141543	-16.1508	1.12149e-58	3.71336e-56
ENSG00000159496.13	88.7058	-2.04061	0.126529	-16.1276	1.6315e-58	5.31895e-56
ENSG00000174718.10	2397.41	-1.991	0.12372	-16.0928	2.86474e-58	9.19798e-56
ENSG00000167984.15	625.622	-2.26721	0.140906	-16.0903	2.98555e-58	9.44282e-56
ENSG00000174944.7	95.6697	-2.53231	0.157435	-16.0848	3.26051e-58	1.01608e-55
ENSG00000186265.8	177.812	-3.30795	0.205731	-16.079	3.58171e-58	1.1e-55
ENSG00000163606.9	114.7	-2.67604	0.166465	-16.0756	3.78047e-58	1.14446e-55
ENSG00000102010.13	494.013	-4.78294	0.297619	-16.0707	4.09688e-58	1.22277e-55
ENSG00000198771.9	1440.94	-2.48773	0.154919	-16.0582	5.0058e-58	1.45374e-55
ENSG00000133561.14	1316.03	-2.20585	0.137366	-16.0582	5.00793e-58	1.45374e-55
ENSG00000223511.4	21.1653	-3.2423	0.202014	-16.0498	5.73029e-58	1.64095e-55
ENSG00000106560.9	637.456	-2.28717	0.142526	-16.0474	5.96239e-58	1.68465e-55
ENSG00000104972.13	774.277	-2.69705	0.16837	-16.0186	9.48024e-58	2.64337e-55
ENSG00000147138.1	102.067	-3.63681	0.227624	-15.9773	1.83932e-57	5.06194e-55
ENSG00000228427.1	33.1588	-2.49668	0.156362	-15.9673	2.16091e-57	5.87074e-55
ENSG00000123329.16	1365.75	-2.45917	0.154307	-15.9369	3.51394e-57	9.42582e-55
ENSG00000174123.9	264.005	-3.88446	0.244198	-15.907	5.66759e-57	1.50127e-54
ENSG00000197536.9	276.073	-2.05096	0.128964	-15.9034	6.00131e-57	1.57005e-54
ENSG00000242258.1	54.7751	-3.12546	0.196714	-15.8883	7.63565e-57	1.97326e-54
ENSG00000120280.5	136.453	-2.48912	0.156845	-15.87	1.02284e-56	2.58352e-54
ENSG00000078589.11	202.374	-3.35896	0.211656	-15.8699	1.02409e-56	2.58352e-54
ENSG00000237484.5	18.5784	-3.05854	0.19278	-15.8654	1.10002e-56	2.74243e-54
ENSG00000150681.8	89.5034	-2.9402	0.185533	-15.8473	1.46683e-56	3.61438e-54
ENSG00000183023.17	467.736	-2.21204	0.139739	-15.8297	1.94058e-56	4.72675e-54
ENSG00000153283.11	776.446	-2.77816	0.175655	-15.816	2.41304e-56	5.81077e-54
ENSG00000187764.10	2331.8	-1.99119	0.126326	-15.7623	5.65328e-56	1.34605e-53
ENSG00000134470.18	555.835	-2.00139	0.127522	-15.6944	1.65069e-55	3.88664e-53
ENSG00000137101.11	778.926	-2.56653	0.163579	-15.6898	1.7751e-55	4.10493e-53
ENSG00000173200.11	385.968	-3.32167	0.211712	-15.6896	1.78214e-55	4.10493e-53
ENSG00000281103.1	176.602	-2.64473	0.168681	-15.6789	2.11029e-55	4.79653e-53
ENSG00000205045.7	118.615	-2.88255	0.183856	-15.6783	2.12767e-55	4.79653e-53
ENSG00000225079.2	41.2339	-3.10611	0.19846	-15.6511	3.26534e-55	7.28377e-53
ENSG00000187210.11	441.284	-2.28878	0.14635	-15.6391	3.94516e-55	8.70852e-53
ENSG00000213809.7	52.7397	-3.45147	0.220729	-15.6367	4.09577e-55	8.94779e-53
ENSG00000121594.10	68.0649	-2.40695	0.154006	-15.6289	4.62787e-55	1.00071e-52
ENSG00000160654.8	548.449	-3.02411	0.193516	-15.6272	4.75373e-55	1.01754e-52
ENSG00000178199.12	219.387	-2.66989	0.17109	-15.6052	6.70882e-55	1.42167e-52
ENSG00000100368.12	1248.46	-2.4758	0.158676	-15.6028	6.96493e-55	1.46133e-52
ENSG00000205542.9	40430.5	-1.82684	0.117162	-15.5924	8.20297e-55	1.70421e-52
ENSG00000233355.5	96.3845	-4.36788	0.280535	-15.5698	1.1677e-54	2.40239e-52
ENSG00000268001.1	182.812	-1.68416	0.108233	-15.5605	1.34935e-54	2.74944e-52
ENSG00000160856.19	579.573	-3.57755	0.229925	-15.5596	1.36941e-54	2.76372e-52
ENSG00000272053.1	21.3194	-2.70736	0.174022	-15.5576	1.41357e-54	2.82594e-52
ENSG00000118308.13	572.204	-3.05311	0.196648	-15.5257	2.32356e-54	4.60174e-52
ENSG00000057657.13	1035.04	-2.15039	0.138529	-15.523	2.42296e-54	4.75415e-52
ENSG00000143119.11	4061.07	-2.46688	0.158991	-15.5159	2.70967e-54	5.2647e-52
ENSG00000155926.12	1817.65	-2.35314	0.151665	-15.5153	2.73285e-54	5.2647e-52
ENSG00000127951.5	2505.43	-2.99777	0.193486	-15.4935	3.84033e-54	7.33158e-52
ENSG00000152213.3	159.131	-2.14018	0.138486	-15.4541	7.07701e-54	1.33901e-51
ENSG00000137757.9	24.9379	-2.63655	0.170717	-15.444	8.28054e-54	1.55286e-51
ENSG00000115165.8	964.584	-2.65049	0.171772	-15.4303	1.02373e-53	1.90297e-51
ENSG00000240143.1	9.5083	-2.90155	0.188098	-15.4258	1.09856e-53	2.02431e-51
ENSG00000128284.18	2634.24	-2.5101	0.162812	-15.4171	1.25534e-53	2.29327e-51
ENSG00000112303.12	230.625	-2.70659	0.176245	-15.357	3.17847e-53	5.75683e-51
ENSG00000188820.11	910.312	-2.84104	0.185322	-15.3303	4.79648e-53	8.61375e-51
ENSG00000125430.7	201.062	-2.26298	0.147647	-15.327	5.04721e-53	8.98785e-51
ENSG00000132274.14	2952.9	-2.25706	0.147278	-15.3252	5.18823e-53	9.16198e-51
ENSG00000213203.2	624.487	-2.12275	0.138783	-15.2955	8.19577e-53	1.43534e-50
ENSG00000134460.14	398.428	-2.56324	0.167886	-15.2678	1.25403e-52	2.17821e-50
ENSG00000105339.9	1072.43	-1.6308	0.106834	-15.2648	1.31233e-52	2.26095e-50
ENSG00000134539.15	398.055	-2.88529	0.189223	-15.248	1.69624e-52	2.8988e-50
ENSG00000107551.19	2776.81	-1.91627	0.125747	-15.2391	1.94653e-52	3.29991e-50
ENSG00000188676.12	15.6921	-3.15604	0.207338	-15.2217	2.53685e-52	4.26654e-50
ENSG00000003402.18	3839.45	-1.0087	0.0662718	-15.2206	2.58001e-52	4.30496e-50
ENSG00000117090.13	680.193	-3.37388	0.222047	-15.1945	3.84657e-52	6.36818e-50
ENSG00000115956.9	2726.78	-2.42136	0.15955	-15.1762	5.08355e-52	8.35081e-50
ENSG00000258352.1	26.3767	-2.55275	0.168272	-15.1704	5.5559e-52	9.05654e-50
ENSG00000110324.8	2941.4	-2.27849	0.150369	-15.1527	7.27599e-52	1.17699e-49
ENSG00000125245.11	147.88	-2.6093	0.172386	-15.1363	9.32913e-52	1.49768e-49
ENSG00000181631.6	283.109	-2.63844	0.174547	-15.1159	1.27208e-51	2.02681e-49
ENSG00000070190.11	352.968	-2.74586	0.181998	-15.0873	1.96385e-51	3.10566e-49
ENSG00000163600.11	229.836	-2.68717	0.178318	-15.0695	2.56991e-51	4.034e-49
ENSG00000087589.15	129.378	-2.17038	0.144095	-15.0622	2.87045e-51	4.47262e-49
ENSG00000131979.17	798.609	-2.0181	0.134035	-15.0565	3.12879e-51	4.83957e-49
ENSG00000091106.17	141.108	-1.60701	0.106767	-15.0516	3.37026e-51	5.17531e-49
ENSG00000255819.5	20.1284	-3.31232	0.220179	-15.0438	3.79409e-51	5.78421e-49
ENSG00000226751.2	17.488	-2.74141	0.182279	-15.0396	4.0384e-51	6.11269e-49
ENSG00000267074.1	35.6525	-3.08409	0.20512	-15.0355	4.29775e-51	6.45912e-49
ENSG00000135363.10	544.245	-1.66551	0.110852	-15.0246	5.06494e-51	7.55853e-49
ENSG00000230812.4	18.2264	-2.27763	0.151767	-15.0074	6.56709e-51	9.73169e-49
ENSG00000267554.1	20.5661	-3.16745	0.211254	-14.9936	8.08782e-51	1.1902e-48
ENSG00000168685.13	1433.56	-3.03489	0.202482	-14.9885	8.7361e-51	1.27674e-48
ENSG00000272908.1	27.8134	-2.37605	0.158542	-14.9869	8.94342e-51	1.29808e-48
ENSG00000174171.5	33.3184	-3.63586	0.243618	-14.9244	2.28643e-50	3.29603e-48
ENSG00000172215.5	637.415	-2.75856	0.185019	-14.9096	2.85416e-50	4.08666e-48
ENSG00000154451.13	3429.6	-3.16531	0.212371	-14.9047	3.07356e-50	4.37126e-48
ENSG00000170571.10	1107.68	-2.46869	0.165753	-14.8938	3.61836e-50	5.11178e-48
ENSG00000188848.14	39.3153	-4.04724	0.271855	-14.8875	3.97312e-50	5.57578e-48
ENSG00000107099.14	2479.82	-2.27008	0.152594	-14.8766	4.67681e-50	6.52015e-48
ENSG00000180539.7	41.318	-2.28008	0.153327	-14.8707	5.10897e-50	7.07609e-48
ENSG00000205056.8	46.1986	-4.31948	0.291473	-14.8195	1.09619e-49	1.50841e-47
ENSG00000258867.4	16.1184	-2.94845	0.199095	-14.8092	1.27664e-49	1.74537e-47
ENSG00000110077.13	2542.09	-2.23402	0.150972	-14.7976	1.51814e-49	2.06224e-47
ENSG00000135426.13	390.435	-2.87868	0.194901	-14.77	2.2887e-49	3.08916e-47
ENSG00000233093.4	19.9523	-3.02898	0.205163	-14.7638	2.50888e-49	3.36492e-47
ENSG00000110665.10	148.65	-2.71193	0.183727	-14.7607	2.62601e-49	3.49985e-47
ENSG00000184682.5	59.0371	-2.61498	0.177165	-14.7601	2.64835e-49	3.50757e-47
ENSG00000254087.6	2105.88	-1.77503	0.120286	-14.7568	2.78207e-49	3.66179e-47
ENSG00000262312.2	15.7458	-2.92282	0.198072	-14.7563	2.80219e-49	3.6655e-47
ENSG00000105639.17	2299.21	-1.98063	0.134351	-14.7422	3.45387e-49	4.49024e-47
ENSG00000273445.1	17.1678	-3.20937	0.218034	-14.7196	4.82737e-49	6.23761e-47
ENSG00000114013.14	888.544	-2.10582	0.14317	-14.7085	5.68709e-49	7.30395e-47
ENSG00000106952.6	180.076	-2.43661	0.165739	-14.7015	6.3034e-49	8.04671e-47
ENSG00000007129.16	159.363	-2.45843	0.167444	-14.6821	8.39484e-49	1.06524e-46
ENSG00000198785.4	91.2249	-2.10341	0.143291	-14.6793	8.75246e-49	1.10401e-46
ENSG00000255987.1	13.4158	-2.89613	0.19774	-14.6462	1.42537e-48	1.78727e-46
ENSG00000121380.11	37.9509	-2.33376	0.159453	-14.636	1.65419e-48	2.062e-46
ENSG00000140968.9	1883.22	-2.63656	0.180176	-14.6333	1.72294e-48	2.13514e-46
ENSG00000130755.11	1458.38	-1.86385	0.127395	-14.6304	1.79733e-48	2.21437e-46
ENSG00000167208.13	871.02	-2.41039	0.164962	-14.6118	2.36227e-48	2.89358e-46
ENSG00000188641.11	972.94	-2.2375	0.153283	-14.5971	2.92969e-48	3.56799e-46
ENSG00000161405.15	2531.69	-2.83676	0.194576	-14.5792	3.81173e-48	4.60606e-46
ENSG00000255026.1	98.7821	-2.67012	0.183149	-14.5789	3.82552e-48	4.60606e-46
ENSG00000004468.11	1200.17	-2.97494	0.204213	-14.5679	4.49764e-48	5.38472e-46
ENSG00000175463.10	1260.85	-2.59972	0.178496	-14.5646	4.71933e-48	5.61839e-46
ENSG00000160593.16	1038.21	-2.18269	0.149875	-14.5634	4.80144e-48	5.68421e-46
ENSG00000168404.11	628.823	-1.45298	0.0997826	-14.5614	4.93994e-48	5.81569e-46
ENSG00000101347.8	5647.09	-1.81283	0.124503	-14.5605	5.00758e-48	5.86274e-46
ENSG00000177409.10	2237.82	-2.30173	0.158107	-14.5581	5.1896e-48	6.04246e-46
ENSG00000211698.2	14.1869	-3.05447	0.209936	-14.5496	5.87793e-48	6.80652e-46
ENSG00000050730.14	64.5907	-2.76185	0.189911	-14.5429	6.48293e-48	7.46629e-46
ENSG00000105851.9	358.304	-2.74076	0.188535	-14.5371	7.04719e-48	8.07228e-46
ENSG00000203710.9	330.232	-3.1141	0.214241	-14.5355	7.21706e-48	8.22241e-46
ENSG00000113088.5	791.401	-3.21616	0.221517	-14.5187	9.21787e-48	1.04458e-45
ENSG00000068831.17	783.986	-2.92928	0.201766	-14.5182	9.28989e-48	1.04714e-45
ENSG00000247982.5	353.73	-3.47668	0.239524	-14.515	9.74119e-48	1.0922e-45
ENSG00000181804.13	443.957	-1.79487	0.123781	-14.5004	1.20525e-47	1.34423e-45
ENSG00000167083.5	133.153	-2.03204	0.140215	-14.4923	1.3543e-47	1.50257e-45
ENSG00000116824.4	1925.98	-2.68933	0.185756	-14.4777	1.67517e-47	1.84889e-45
ENSG00000111796.3	147.009	-2.24478	0.155125	-14.4708	1.85421e-47	2.02943e-45
ENSG00000197992.5	44.4878	-2.93742	0.202992	-14.4706	1.85791e-47	2.02943e-45
ENSG00000163563.7	491.941	-2.20274	0.152253	-14.4676	1.94031e-47	2.10857e-45
ENSG00000204136.9	416.516	-2.03961	0.141098	-14.4553	2.3205e-47	2.50886e-45
ENSG00000111348.7	9421.75	-1.86201	0.128906	-14.4447	2.70811e-47	2.91308e-45
ENSG00000225885.5	16.6929	-3.17759	0.220042	-14.4408	2.86368e-47	3.06486e-45
ENSG00000188282.11	52.7227	-2.91759	0.202053	-14.4397	2.9105e-47	3.09932e-45
ENSG00000168229.3	28.8511	-2.16479	0.149924	-14.4392	2.93109e-47	3.10564e-45
ENSG00000211787.1	33.6101	-3.04166	0.21066	-14.4387	2.9526e-47	3.11286e-45
ENSG00000260719.1	17.322	-3.12259	0.216288	-14.4372	3.02021e-47	3.16838e-45
ENSG00000251301.5	51.3466	-2.62407	0.182	-14.418	3.98988e-47	4.165e-45
ENSG00000247774.5	631.432	-2.34765	0.162866	-14.4146	4.18882e-47	4.35124e-45
ENSG00000266094.5	1924.82	-2.11361	0.14667	-14.4106	4.4374e-47	4.58697e-45
ENSG00000168071.20	1606.3	-1.89845	0.132071	-14.3745	7.47685e-47	7.69136e-45
ENSG00000164691.15	815.911	-2.33446	0.162512	-14.3648	8.60606e-47	8.8102e-45
ENSG00000257524.4	23.6798	-2.16887	0.151177	-14.3466	1.11903e-46	1.14007e-44
ENSG00000258875.4	55.5104	-2.27762	0.158819	-14.341	1.2127e-46	1.22959e-44
ENSG00000258116.1	17.7817	-3.27	0.228058	-14.3385	1.25815e-46	1.26959e-44
ENSG00000232855.5	13.4504	-2.4501	0.171045	-14.3242	1.54399e-46	1.55065e-44
ENSG00000256039.1	98.2001	-3.30336	0.230659	-14.3214	1.6079e-46	1.60722e-44
ENSG00000162739.12	821.645	-2.8111	0.196325	-14.3186	1.67474e-46	1.66617e-44
ENSG00000185811.15	1863.41	-2.59958	0.181599	-14.315	1.76409e-46	1.74686e-44
ENSG00000102524.10	1180.51	-2.5154	0.175945	-14.2966	2.29897e-46	2.26593e-44
ENSG00000125735.9	115.869	-2.2658	0.158519	-14.2936	2.39904e-46	2.35361e-44
ENSG00000181896.10	723.61	-1.35251	0.0946847	-14.2844	2.73944e-46	2.67518e-44
ENSG00000145287.9	306.51	-3.08363	0.215903	-14.2825	2.81463e-46	2.72943e-44
ENSG00000167895.13	2204.63	-2.23065	0.156182	-14.2823	2.82075e-46	2.72943e-44
ENSG00000072818.10	1623.68	-2.36469	0.165573	-14.2818	2.84121e-46	2.73673e-44
ENSG00000197646.7	314.61	-2.42241	0.169894	-14.2584	3.9742e-46	3.81074e-44
ENSG00000172794.18	392.19	-2.42344	0.170176	-14.2407	5.11832e-46	4.88569e-44
ENSG00000280153.1	254.894	-2.16117	0.151938	-14.224	6.50593e-46	6.18239e-44
ENSG00000234290.2	65.9501	-2.31132	0.162541	-14.22	6.88716e-46	6.51543e-44
ENSG00000258181.1	8.33203	-2.68583	0.188952	-14.2143	7.46659e-46	7.0322e-44
ENSG00000271856.1	114.55	-4.04124	0.28435	-14.2122	7.69745e-46	7.21755e-44
ENSG00000105122.11	1375.11	-2.33372	0.164255	-14.2079	8.17955e-46	7.63581e-44
ENSG00000226004.1	13.3877	-3.4	0.239335	-14.206	8.40748e-46	7.81416e-44
ENSG00000150637.7	236.622	-2.32786	0.164065	-14.1886	1.07801e-45	9.97557e-44
ENSG00000129675.14	1533.57	-1.81523	0.128067	-14.174	1.32681e-45	1.22245e-43
ENSG00000153064.10	544.434	-4.04074	0.285116	-14.1723	1.36028e-45	1.24787e-43
ENSG00000180353.9	4332.68	-2.06832	0.145972	-14.1693	1.41894e-45	1.29607e-43
ENSG00000143851.14	1543.15	-2.33877	0.165174	-14.1595	1.63163e-45	1.48394e-43
ENSG00000198821.9	812.511	-2.58826	0.182812	-14.1581	1.66497e-45	1.50779e-43
ENSG00000197872.10	483.198	-1.95582	0.138157	-14.1565	1.70257e-45	1.53528e-43
ENSG00000211689.5	62.1296	-2.68247	0.18951	-14.1547	1.74595e-45	1.56773e-43
ENSG00000123338.11	3173.11	-2.25547	0.159432	-14.1469	1.95227e-45	1.7456e-43
ENSG00000165168.7	3946	-2.50236	0.177057	-14.1331	2.37502e-45	2.11466e-43
ENSG00000145649.7	952.308	-2.8006	0.198271	-14.1251	2.65944e-45	2.358e-43
ENSG00000160791.13	1098.73	-2.62573	0.185961	-14.1198	2.86938e-45	2.53354e-43
ENSG00000140749.8	1075.61	-2.158	0.152923	-14.1117	3.21759e-45	2.82921e-43
ENSG00000121858.9	1516.98	-2.24742	0.159307	-14.1075	3.41496e-45	2.98248e-43
ENSG00000185905.3	491.924	-2.48045	0.175826	-14.1074	3.42005e-45	2.98248e-43
ENSG00000011590.12	96.5671	-2.23727	0.15866	-14.101	3.74436e-45	3.25192e-43
ENSG00000152969.15	175.771	-2.85587	0.202551	-14.0995	3.824e-45	3.30753e-43
ENSG00000236935.1	19.6162	-2.63992	0.187339	-14.0917	4.27235e-45	3.6803e-43
ENSG00000215788.8	270.882	-2.10751	0.149668	-14.0812	4.9574e-45	4.2506e-43
ENSG00000145088.7	184.294	-1.98327	0.140848	-14.0809	4.97451e-45	4.2506e-43
ENSG00000126860.10	633.56	-2.27854	0.161951	-14.0693	5.86523e-45	4.99157e-43
ENSG00000187862.10	69.235	-2.99262	0.212795	-14.0634	6.37559e-45	5.4042e-43
ENSG00000204161.12	382.924	-1.84837	0.131585	-14.047	8.03924e-45	6.78723e-43
ENSG00000267369.1	110.495	-2.70647	0.193085	-14.017	1.22659e-44	1.03145e-42
ENSG00000141968.6	1157.1	-2.24936	0.160509	-14.0139	1.28191e-44	1.07371e-42
ENSG00000239636.1	38.5931	-1.99249	0.142503	-13.9821	2.00567e-44	1.67332e-42
ENSG00000162676.10	260.814	-2.37501	0.169999	-13.9708	2.35119e-44	1.95389e-42
ENSG00000134516.14	2360.84	-2.27939	0.16316	-13.9703	2.3667e-44	1.95909e-42
ENSG00000100385.12	2611.46	-2.33228	0.167261	-13.9439	3.42482e-44	2.82394e-42
ENSG00000158985.12	2882.34	-1.28749	0.0923954	-13.9346	3.90347e-44	3.20614e-42
ENSG00000077420.14	1318.35	-2.21434	0.158927	-13.933	3.99143e-44	3.26573e-42
ENSG00000204472.11	1840.78	-1.97318	0.141696	-13.9254	4.43809e-44	3.61721e-42
ENSG00000181847.10	1153.1	-2.75541	0.197959	-13.9191	4.84949e-44	3.93738e-42
ENSG00000156234.7	2300.05	-3.25194	0.233948	-13.9003	6.3104e-44	5.10395e-42
ENSG00000146192.13	884.882	-2.22225	0.159885	-13.8991	6.415e-44	5.16883e-42
ENSG00000261416.1	27.2981	-2.63618	0.18988	-13.8834	7.98451e-44	6.40908e-42
ENSG00000196684.11	504.055	-2.78999	0.201185	-13.8678	9.93364e-44	7.94353e-42
ENSG00000174500.11	153.427	-2.59669	0.187277	-13.8655	1.02563e-43	8.17071e-42
ENSG00000162645.11	7113.85	-2.1781	0.157107	-13.8638	1.04972e-43	8.3313e-42
ENSG00000211796.1	16.2471	-2.86085	0.206436	-13.8583	1.13304e-43	8.93405e-42
ENSG00000172243.16	463.241	-2.15652	0.155613	-13.8582	1.13409e-43	8.93405e-42
ENSG00000274536.3	50.1673	-2.51758	0.18177	-13.8503	1.26608e-43	9.93682e-42
ENSG00000268041.1	17.6386	-2.61381	0.188873	-13.839	1.48218e-43	1.159e-41
ENSG00000111817.15	766.997	-1.89387	0.136901	-13.8338	1.59343e-43	1.24141e-41
ENSG00000211699.2	12.4906	-2.67484	0.19343	-13.8285	1.71641e-43	1.33232e-41
ENSG00000145850.7	112.178	-3.63022	0.262601	-13.8241	1.82343e-43	1.41023e-41
ENSG00000064201.14	155.098	-2.37999	0.172299	-13.8131	2.12503e-43	1.63751e-41
ENSG00000228168.1	61.3928	-2.28784	0.165677	-13.809	2.24803e-43	1.72602e-41
ENSG00000224875.2	12.1389	-2.90817	0.210852	-13.7925	2.82822e-43	2.16364e-41
ENSG00000186517.12	2987.63	-2.11888	0.153722	-13.7839	3.18679e-43	2.42918e-41
ENSG00000136541.13	40.4778	-2.7767	0.201535	-13.7778	3.46687e-43	2.63321e-41
ENSG00000254802.1	20.0633	-2.7129	0.196917	-13.7769	3.50913e-43	2.65579e-41
ENSG00000163564.13	468.917	-2.71566	0.197192	-13.7717	3.7734e-43	2.84563e-41
ENSG00000124256.13	350.792	-2.57916	0.18744	-13.7599	4.44237e-43	3.33824e-41
ENSG00000035720.6	160.498	-3.55125	0.258456	-13.7403	5.82727e-43	4.36345e-41
ENSG00000140853.14	4082.63	-1.56207	0.113806	-13.7258	7.11863e-43	5.31165e-41
ENSG00000000971.14	2242.22	-1.97736	0.144081	-13.7239	7.29875e-43	5.42694e-41
ENSG00000131203.11	2020.61	-3.34416	0.243723	-13.7211	7.58555e-43	5.62047e-41
ENSG00000169508.6	523.293	-2.39842	0.175043	-13.7019	9.89488e-43	7.30601e-41
ENSG00000066294.13	1351.3	-2.29821	0.167808	-13.6955	1.08012e-42	7.94751e-41
ENSG00000054219.10	390.992	-2.49935	0.182553	-13.6911	1.14821e-42	8.4193e-41
ENSG00000137033.10	718.234	-2.72292	0.198978	-13.6845	1.25617e-42	9.17914e-41
ENSG00000148516.20	752.362	-1.88299	0.137608	-13.6838	1.26889e-42	9.24024e-41
ENSG00000069493.13	1088.83	-1.91679	0.140272	-13.6647	1.6488e-42	1.19657e-40
ENSG00000101916.11	327.899	-2.77031	0.203082	-13.6414	2.27292e-42	1.64387e-40
ENSG00000171657.5	34.2607	-2.48603	0.182248	-13.6409	2.28665e-42	1.64818e-40
ENSG00000211778.2	34.484	-2.94607	0.215992	-13.6397	2.32363e-42	1.66916e-40
ENSG00000163131.9	8902.27	-1.9733	0.144812	-13.6266	2.78228e-42	1.99187e-40
ENSG00000225205.4	49.5914	-1.78733	0.131374	-13.605	3.74201e-42	2.66993e-40
ENSG00000104043.13	145.098	-2.01286	0.147975	-13.6027	3.85953e-42	2.74454e-40
ENSG00000161929.13	527.099	-2.49581	0.183896	-13.5719	5.88162e-42	4.16248e-40
ENSG00000163154.5	425.538	-1.91438	0.141057	-13.5717	5.8928e-42	4.16248e-40
ENSG00000169248.11	603.984	-3.15837	0.23287	-13.5628	6.65194e-42	4.6831e-40
ENSG00000198574.5	56.5913	-2.7743	0.204905	-13.5394	9.14937e-42	6.41455e-40
ENSG00000122188.11	281.917	-2.988	0.220692	-13.5393	9.17187e-42	6.41455e-40
ENSG00000176160.8	10.8512	-3.04603	0.225154	-13.5286	1.05984e-41	7.38787e-40
ENSG00000138449.9	2407.22	-2.39279	0.176885	-13.5274	1.07794e-41	7.48941e-40
ENSG00000117228.9	7158.1	-2.69907	0.199668	-13.5178	1.22781e-41	8.50277e-40
ENSG00000211694.2	35.9402	-2.92479	0.216377	-13.5171	1.23953e-41	8.55601e-40
ENSG00000137462.6	815.761	-1.77498	0.131465	-13.5016	1.53075e-41	1.05319e-39
ENSG00000135439.10	536.817	-1.7342	0.128487	-13.4971	1.62756e-41	1.11617e-39
ENSG00000118849.8	735.862	-2.31534	0.171562	-13.4956	1.65984e-41	1.13463e-39
ENSG00000103522.14	609.937	-2.53324	0.187714	-13.4952	1.66911e-41	1.1373e-39
ENSG00000162511.7	16922.8	-1.95905	0.145458	-13.4681	2.40902e-41	1.63621e-39
ENSG00000120262.9	65.6893	-2.1051	0.156306	-13.4678	2.41838e-41	1.63732e-39
ENSG00000246526.2	24.0019	-1.92373	0.142913	-13.4608	2.65956e-41	1.79486e-39
ENSG00000160185.12	308.996	-2.58507	0.192134	-13.4545	2.897e-41	1.9489e-39
ENSG00000120899.16	2417.88	-1.53924	0.114625	-13.4285	4.1161e-41	2.76026e-39
ENSG00000169442.7	2287.56	-2.40695	0.179345	-13.4208	4.56808e-41	3.0537e-39
ENSG00000136167.12	12629.4	-2.13428	0.15904	-13.4198	4.62891e-41	3.08463e-39
ENSG00000198286.8	1003.63	-2.47145	0.184202	-13.417	4.80675e-41	3.1931e-39
ENSG00000256262.1	81.4641	-2.48367	0.185198	-13.4109	5.22096e-41	3.45742e-39
ENSG00000101082.12	446.575	-2.47057	0.18458	-13.3848	7.41805e-41	4.89707e-39
ENSG00000185432.11	1578.77	-1.85145	0.138355	-13.3819	7.71262e-41	5.07572e-39
ENSG00000211751.6	75.5491	-2.778	0.207737	-13.3727	8.73657e-41	5.73178e-39
ENSG00000074966.9	94.326	-2.32635	0.174004	-13.3696	9.10683e-41	5.95626e-39
ENSG00000260101.1	45.4025	-1.82554	0.136573	-13.3668	9.45753e-41	6.1666e-39
ENSG00000162654.8	6624.05	-2.8833	0.21576	-13.3634	9.8901e-41	6.42887e-39
ENSG00000239713.6	1661.88	-2.0253	0.151627	-13.3572	1.07601e-40	6.973e-39
ENSG00000280008.1	14.3952	-2.18976	0.163996	-13.3526	1.14453e-40	7.39444e-39
ENSG00000227191.5	199.788	-2.7621	0.206958	-13.3462	1.2462e-40	8.02679e-39
ENSG00000240954.1	13.0325	-2.43373	0.18247	-13.3377	1.39684e-40	8.96986e-39
ENSG00000250155.1	14.5122	-2.7098	0.203342	-13.3263	1.6278e-40	1.04214e-38
ENSG00000175857.7	171.556	-2.78479	0.208979	-13.3257	1.64085e-40	1.04733e-38
ENSG00000138755.5	10929.8	-3.1197	0.234168	-13.3225	1.71256e-40	1.08981e-38
ENSG00000181036.12	142.101	-2.41805	0.181769	-13.3029	2.2278e-40	1.41346e-38
ENSG00000245954.5	41.8149	-2.92325	0.219914	-13.2927	2.55187e-40	1.61423e-38
ENSG00000182162.8	931.413	-2.26738	0.170629	-13.2883	2.70552e-40	1.70633e-38
ENSG00000185479.5	6079.33	6.64829	0.500487	13.2836	2.88033e-40	1.81119e-38
ENSG00000229417.1	28.6096	-2.33065	0.175655	-13.2683	3.53396e-40	2.21562e-38
ENSG00000237513.1	35.1789	-2.32698	0.175443	-13.2634	3.77198e-40	2.35788e-38
ENSG00000177272.8	112.203	-2.69343	0.203167	-13.2572	4.09854e-40	2.5511e-38
ENSG00000211746.3	92.6956	-2.84301	0.214452	-13.2571	4.10516e-40	2.5511e-38
ENSG00000140368.11	735.888	-2.11391	0.159477	-13.2553	4.20675e-40	2.60658e-38
ENSG00000168918.12	2562.02	-2.14978	0.162313	-13.2447	4.84523e-40	2.99345e-38
ENSG00000198846.5	495.936	-2.37035	0.178972	-13.2443	4.86975e-40	2.99985e-38
ENSG00000182866.15	1607.6	-2.53637	0.191622	-13.2363	5.41642e-40	3.32694e-38
ENSG00000260228.4	15.2335	-2.34121	0.177071	-13.2219	6.56258e-40	4.01929e-38
ENSG00000179715.11	760.379	-2.08715	0.157862	-13.2213	6.60976e-40	4.03653e-38
ENSG00000257924.1	14.853	-2.92966	0.221638	-13.2182	6.88666e-40	4.19354e-38
ENSG00000118971.6	2150.84	-1.90609	0.144268	-13.2122	7.4648e-40	4.53257e-38
ENSG00000102096.9	3620.49	-1.77363	0.134314	-13.2051	8.19732e-40	4.96312e-38
ENSG00000010671.14	852.718	-1.93658	0.146846	-13.1879	1.03063e-39	6.22224e-38
ENSG00000147251.14	944.211	-1.8659	0.141709	-13.1672	1.35583e-39	8.16231e-38
ENSG00000028277.19	1021.05	-2.24845	0.170856	-13.1599	1.49308e-39	8.96314e-38
ENSG00000125384.6	109.004	-2.17704	0.165578	-13.1481	1.74515e-39	1.04467e-37
ENSG00000166927.11	1097.75	-1.93794	0.147478	-13.1405	1.92981e-39	1.15196e-37
ENSG00000128438.9	58.5647	-3.99686	0.304274	-13.1357	2.05591e-39	1.22379e-37
ENSG00000185482.6	267.294	-1.56488	0.119182	-13.1302	2.21102e-39	1.31243e-37
ENSG00000168016.12	1512.16	-1.70836	0.130127	-13.1284	2.26287e-39	1.33946e-37
ENSG00000167483.16	362.569	-3.67156	0.279699	-13.1268	2.31173e-39	1.36456e-37
ENSG00000262370.4	36.7209	-1.94961	0.148589	-13.1208	2.50324e-39	1.4735e-37
ENSG00000117560.7	202.433	-2.77342	0.211648	-13.1039	3.12704e-39	1.8356e-37
ENSG00000159753.12	638.515	-2.3742	0.181204	-13.1024	3.19047e-39	1.86766e-37
ENSG00000196209.11	223.446	-2.05387	0.15683	-13.0962	3.46277e-39	2.02148e-37
ENSG00000120217.12	559.211	-2.14406	0.163722	-13.0957	3.48362e-39	2.02806e-37
ENSG00000241106.5	399.72	-2.63014	0.200862	-13.0943	3.55004e-39	2.06106e-37
ENSG00000205089.6	22.8964	-1.86193	0.142211	-13.0927	3.62484e-39	2.09874e-37
ENSG00000211771.1	10.7066	-2.89979	0.22172	-13.0786	4.36328e-39	2.51941e-37
ENSG00000229474.5	169.297	-2.17348	0.166274	-13.0717	4.77844e-39	2.75163e-37
ENSG00000159618.14	378.842	-2.49416	0.190819	-13.0708	4.83426e-39	2.77623e-37
ENSG00000198829.6	139.52	-2.31796	0.17735	-13.07	4.88648e-39	2.79863e-37
ENSG00000153563.14	3051.62	-2.84171	0.217466	-13.0674	5.05648e-39	2.88819e-37
ENSG00000123609.9	885.128	-1.52178	0.116553	-13.0566	5.83045e-39	3.32132e-37
ENSG00000100055.19	1736.45	-1.84453	0.141276	-13.0562	5.85716e-39	3.32759e-37
ENSG00000258810.1	15.5067	-2.05058	0.157084	-13.054	6.02755e-39	3.41524e-37
ENSG00000242574.7	4101.94	-2.04908	0.157002	-13.0513	6.24613e-39	3.52965e-37
ENSG00000111537.4	116.405	-3.32434	0.254944	-13.0395	7.29403e-39	4.11084e-37
ENSG00000211786.3	33.3969	-2.76075	0.211776	-13.0361	7.62189e-39	4.28423e-37
ENSG00000168310.9	2176.09	-0.837748	0.0642668	-13.0355	7.68992e-39	4.31103e-37
ENSG00000167286.8	1039.21	-2.53853	0.195005	-13.0178	9.69798e-39	5.42243e-37
ENSG00000156265.14	193.174	-1.72279	0.132361	-13.0158	9.94861e-39	5.54792e-37
ENSG00000135077.7	1462.95	-2.04754	0.157397	-13.0088	1.09043e-38	6.0649e-37
ENSG00000136048.12	1899.32	-1.27836	0.098329	-13.0008	1.21054e-38	6.7153e-37
ENSG00000260711.2	39.5235	-2.42495	0.186604	-12.9952	1.30347e-38	7.21197e-37
ENSG00000196664.4	345.814	-2.40529	0.185098	-12.9947	1.31109e-38	7.23526e-37
ENSG00000146374.12	97.4553	-2.45658	0.189184	-12.9851	1.48604e-38	8.17941e-37
ENSG00000169245.5	3336.48	-3.07671	0.237087	-12.9772	1.64903e-38	9.05299e-37
ENSG00000072858.9	303.656	-1.99813	0.154047	-12.9709	1.78856e-38	9.79362e-37
ENSG00000049249.7	607.202	-2.5712	0.198348	-12.9631	1.98174e-38	1.08235e-36
ENSG00000250654.6	25.2419	-2.25012	0.173652	-12.9576	2.12843e-38	1.15948e-36
ENSG00000106415.11	652.041	-1.55232	0.119807	-12.9569	2.14723e-38	1.16672e-36
ENSG00000183508.4	1521.8	-2.4457	0.188887	-12.9479	2.41408e-38	1.30836e-36
ENSG00000082196.19	739.29	-3.64402	0.281827	-12.93	3.04888e-38	1.64819e-36
ENSG00000155849.14	1342.63	-1.75163	0.135566	-12.9209	3.43267e-38	1.85094e-36
ENSG00000203747.8	5121.61	-2.3304	0.180404	-12.9177	3.57881e-38	1.92483e-36
ENSG00000026103.18	601.532	-1.59057	0.123336	-12.8962	4.72545e-38	2.53511e-36
ENSG00000100453.11	1181.07	-2.56625	0.19928	-12.8776	6.01395e-38	3.21822e-36
ENSG00000065675.13	259.761	-2.30087	0.178985	-12.8551	8.05404e-38	4.29907e-36
ENSG00000280721.1	80.9506	-2.20884	0.171966	-12.8447	9.21609e-38	4.90699e-36
ENSG00000134061.5	632.494	-2.3115	0.18003	-12.8395	9.84979e-38	5.23125e-36
ENSG00000183813.6	142.539	-2.62049	0.204363	-12.8227	1.22323e-37	6.48039e-36
ENSG00000188404.7	2440.62	-2.75008	0.214674	-12.8105	1.43176e-37	7.56617e-36
ENSG00000267344.1	14.2912	-2.24801	0.175489	-12.8099	1.44234e-37	7.60313e-36
ENSG00000070915.8	27.8904	-2.40336	0.187759	-12.8002	1.63436e-37	8.59399e-36
ENSG00000073861.2	224.396	-2.42286	0.189339	-12.7964	1.71649e-37	9.00349e-36
ENSG00000159388.5	2973.21	-1.57027	0.122724	-12.7951	1.74587e-37	9.13499e-36
ENSG00000211794.3	33.44	-2.75721	0.215723	-12.7813	2.08603e-37	1.0888e-35
ENSG00000132704.14	178.639	-3.66336	0.286669	-12.7791	2.14573e-37	1.1172e-35
ENSG00000261448.1	12.9375	-2.83097	0.221558	-12.7776	2.18748e-37	1.13615e-35
ENSG00000136250.10	935.79	-2.34933	0.184212	-12.7534	2.98448e-37	1.54631e-35
ENSG00000082074.14	2865.32	-1.9778	0.155294	-12.7358	3.73758e-37	1.93178e-35
ENSG00000235750.8	1266.08	-1.70318	0.133789	-12.7303	4.01174e-37	2.06844e-35
ENSG00000275302.1	1072.53	-2.39112	0.187919	-12.7242	4.33952e-37	2.23201e-35
ENSG00000164112.11	53.4953	-3.25488	0.25584	-12.7223	4.44494e-37	2.2807e-35
ENSG00000265531.2	26.8459	-2.25941	0.177695	-12.7151	4.875e-37	2.49532e-35
ENSG00000150048.9	161.786	-2.21531	0.174251	-12.7134	4.98398e-37	2.54495e-35
ENSG00000197629.5	3525.65	-2.0768	0.163374	-12.7119	5.07918e-37	2.58733e-35
ENSG00000139514.11	9639.24	1.26324	0.0994985	12.696	6.21917e-37	3.16044e-35
ENSG00000267364.1	34.0982	-1.8658	0.146975	-12.6946	6.33452e-37	3.21136e-35
ENSG00000117594.8	207.626	-2.57634	0.203187	-12.6796	7.67017e-37	3.8792e-35
ENSG00000235532.1	32.928	-3.94017	0.310967	-12.6707	8.59506e-37	4.33662e-35
ENSG00000167851.12	690.804	-1.76727	0.139482	-12.6702	8.64875e-37	4.3533e-35
ENSG00000074660.14	436.56	-1.31773	0.104004	-12.67	8.66921e-37	4.3533e-35
ENSG00000163376.10	180.092	-2.13053	0.168187	-12.6676	8.93649e-37	4.47691e-35
ENSG00000189233.10	129.58	-3.00161	0.237168	-12.656	1.0359e-36	5.17731e-35
ENSG00000196628.12	1539.74	-1.81916	0.14384	-12.6471	1.16097e-36	5.78875e-35
ENSG00000089012.13	626.639	-2.59328	0.205724	-12.6056	1.96562e-36	9.7778e-35
ENSG00000122122.9	2327.33	-2.19934	0.174498	-12.6038	2.01128e-36	9.98149e-35
ENSG00000127152.16	607.144	-2.37767	0.188657	-12.6031	2.02992e-36	1.00505e-34
ENSG00000107742.11	3712.37	-2.13701	0.169588	-12.6012	2.0806e-36	1.02774e-34
ENSG00000263961.5	48.5634	-2.8693	0.227711	-12.6006	2.09532e-36	1.0326e-34
ENSG00000132530.15	570.949	-2.30731	0.183378	-12.5823	2.64337e-36	1.29967e-34
ENSG00000122025.13	80.6715	-2.47976	0.197269	-12.5705	3.0697e-36	1.50579e-34
ENSG00000230155.5	19.4782	-2.07125	0.1648	-12.5683	3.15361e-36	1.54338e-34
ENSG00000229754.1	543.101	-3.10091	0.246826	-12.5632	3.3654e-36	1.64323e-34
ENSG00000134571.9	10.2382	-2.20481	0.175647	-12.5525	3.84975e-36	1.8754e-34
ENSG00000137078.7	532.171	-2.51431	0.200377	-12.5479	4.08037e-36	1.98319e-34
ENSG00000026950.15	3474.66	-1.36859	0.10908	-12.5466	4.14773e-36	2.01132e-34
ENSG00000005844.16	3726.67	-2.38649	0.190327	-12.5388	4.57596e-36	2.21391e-34
ENSG00000165409.14	36.8888	-2.42088	0.193079	-12.5382	4.61068e-36	2.22562e-34
ENSG00000272382.1	10.6888	-1.97687	0.157695	-12.536	4.74357e-36	2.28457e-34
ENSG00000096968.11	881.418	-1.61117	0.128723	-12.5166	6.06118e-36	2.91253e-34
ENSG00000154262.11	320.774	-2.85122	0.227935	-12.5089	6.67177e-36	3.19868e-34
ENSG00000197520.9	30.529	-2.46795	0.197351	-12.5054	6.97875e-36	3.3383e-34
ENSG00000116574.5	390.6	-1.70781	0.136706	-12.4925	8.20136e-36	3.9143e-34
ENSG00000106565.16	4367.66	-1.88429	0.150943	-12.4834	9.19328e-36	4.37786e-34
ENSG00000198019.11	83.8177	-2.17621	0.174339	-12.4826	9.28584e-36	4.41202e-34
ENSG00000249437.6	42.4339	-1.94281	0.155755	-12.4735	1.04176e-35	4.9387e-34
ENSG00000234883.3	197.167	-2.47098	0.19818	-12.4684	1.11034e-35	5.25204e-34
ENSG00000142102.14	1900.44	-1.85909	0.149128	-12.4664	1.13814e-35	5.37155e-34
ENSG00000211753.3	903.788	-2.50277	0.200841	-12.4615	1.21119e-35	5.70363e-34
ENSG00000131042.12	1000.89	-2.05556	0.165019	-12.4565	1.28957e-35	6.05928e-34
ENSG00000277734.3	4313.34	-2.32544	0.186736	-12.4531	1.34578e-35	6.30938e-34
ENSG00000135074.14	2164.66	-1.884	0.151422	-12.442	1.54539e-35	7.2292e-34
ENSG00000173193.12	6338.65	-1.41692	0.113906	-12.4394	1.59762e-35	7.45711e-34
ENSG00000105483.15	1976.04	-1.11634	0.0897806	-12.4341	1.70719e-35	7.95099e-34
ENSG00000279933.1	7.11169	-2.37252	0.190859	-12.4307	1.77994e-35	8.27164e-34
ENSG00000281100.1	11.4103	-1.9453	0.156548	-12.4262	1.88422e-35	8.73708e-34
ENSG00000111729.11	159.11	-1.77581	0.142925	-12.4248	1.91789e-35	8.87381e-34
ENSG00000156738.16	1975.51	-4.17218	0.336375	-12.4034	2.5055e-35	1.15674e-33
ENSG00000135362.12	439.597	-1.49533	0.120604	-12.3987	2.65702e-35	1.22402e-33
ENSG00000261218.4	26.0356	-2.66191	0.214934	-12.3847	3.16118e-35	1.45312e-33
ENSG00000211799.3	53.6688	-2.77812	0.224462	-12.3768	3.49013e-35	1.60085e-33
ENSG00000186583.10	16.629	-2.10231	0.16995	-12.3702	3.78958e-35	1.73445e-33
ENSG00000211728.2	33.0566	-2.9735	0.24046	-12.3659	3.99813e-35	1.82595e-33
ENSG00000111540.14	15750.5	0.991156	0.0801675	12.3636	4.11468e-35	1.87514e-33
ENSG00000233834.5	22.2715	-2.29397	0.185614	-12.3588	4.36474e-35	1.98483e-33
ENSG00000115604.9	116.755	-2.08186	0.168515	-12.3541	4.62647e-35	2.09935e-33
ENSG00000106948.15	4045.21	-1.62665	0.131703	-12.3509	4.8157e-35	2.18054e-33
ENSG00000121807.5	406.032	-2.42156	0.196098	-12.3487	4.94844e-35	2.23587e-33
ENSG00000124196.5	10.7281	-2.69037	0.21788	-12.3479	4.99796e-35	2.25344e-33
ENSG00000211801.3	44.2628	-2.75131	0.222838	-12.3467	5.07766e-35	2.28452e-33
ENSG00000139970.15	285.638	-2.10905	0.170844	-12.3449	5.18805e-35	2.32924e-33
ENSG00000183484.10	416.393	-1.74815	0.141631	-12.343	5.31251e-35	2.38007e-33
ENSG00000140285.8	282.217	-2.37529	0.192532	-12.3371	5.71486e-35	2.55493e-33
ENSG00000104814.11	1471.15	-1.94658	0.157816	-12.3345	5.90899e-35	2.63616e-33
ENSG00000100365.13	918.299	-1.69497	0.137653	-12.3134	7.67436e-35	3.41654e-33
ENSG00000140284.9	65.8565	-2.39576	0.194599	-12.3113	7.87519e-35	3.4986e-33
ENSG00000260244.1	174.993	-1.70197	0.138282	-12.308	8.20522e-35	3.63759e-33
ENSG00000142583.16	707.526	-1.97954	0.160901	-12.3028	8.74406e-35	3.86838e-33
ENSG00000205038.10	20.1774	-2.87246	0.233487	-12.3025	8.78597e-35	3.87882e-33
ENSG00000204252.11	3600.74	-2.39673	0.195007	-12.2904	1.01941e-34	4.49111e-33
ENSG00000111679.15	3666.18	-1.97439	0.1607	-12.2862	1.07433e-34	4.72326e-33
ENSG00000266088.4	135.133	-1.95825	0.159577	-12.2715	1.28833e-34	5.6524e-33
ENSG00000168003.15	27165.4	1.34465	0.109666	12.2613	1.46075e-34	6.39559e-33
ENSG00000211777.2	37.7074	-2.7844	0.227101	-12.2606	1.47367e-34	6.43887e-33
ENSG00000124203.5	298.058	-2.68348	0.21939	-12.2315	2.10986e-34	9.1996e-33
ENSG00000102879.14	8149.69	-2.18119	0.178342	-12.2304	2.13965e-34	9.31034e-33
ENSG00000142512.13	775.514	-2.2152	0.181148	-12.2287	2.18498e-34	9.48809e-33
ENSG00000233306.2	11.8241	-2.88081	0.235621	-12.2264	2.24569e-34	9.73179e-33
ENSG00000198624.11	1657.06	-1.87627	0.153591	-12.216	2.55332e-34	1.10423e-32
ENSG00000111885.6	1301.74	-1.93483	0.158483	-12.2084	2.80199e-34	1.20931e-32
ENSG00000279296.1	10.1678	-2.62705	0.215216	-12.2066	2.86719e-34	1.23493e-32
ENSG00000172116.20	703.944	-2.73186	0.223867	-12.2031	2.99345e-34	1.2867e-32
ENSG00000231105.1	17.4793	-2.2376	0.183584	-12.1884	3.58241e-34	1.53674e-32
ENSG00000225492.5	370.713	-2.89733	0.237909	-12.1783	4.05703e-34	1.73682e-32
ENSG00000095585.15	454.44	-2.16074	0.177627	-12.1645	4.80478e-34	2.05279e-32
ENSG00000279805.1	16.4043	-2.22163	0.182845	-12.1503	5.71295e-34	2.43588e-32
ENSG00000086730.15	866.384	-1.66568	0.13711	-12.1485	5.84069e-34	2.48534e-32
ENSG00000206344.6	42.6193	-1.89144	0.155741	-12.1447	6.1183e-34	2.59825e-32
ENSG00000075884.11	899.941	-2.0806	0.171363	-12.1415	6.36806e-34	2.69891e-32
ENSG00000197142.9	1007.17	-1.87833	0.154758	-12.1373	6.70403e-34	2.83563e-32
ENSG00000271503.4	7471.39	-2.43552	0.200704	-12.1349	6.89955e-34	2.91252e-32
ENSG00000110876.9	2445.16	-1.75609	0.144758	-12.1312	7.21845e-34	3.04108e-32
ENSG00000152583.11	6286.81	-2.24589	0.185237	-12.1244	7.84496e-34	3.29846e-32
ENSG00000211747.3	146.925	-2.62673	0.216744	-12.119	8.37371e-34	3.51381e-32
ENSG00000109861.14	9626.5	-1.22165	0.100944	-12.1023	1.027e-33	4.301e-32
ENSG00000117226.10	1184.76	-2.05637	0.169928	-12.1014	1.03842e-33	4.34028e-32
ENSG00000128815.16	1475.84	-2.26528	0.187261	-12.0969	1.09709e-33	4.57645e-32
ENSG00000204287.12	64504.8	-2.05149	0.169682	-12.0901	1.19076e-33	4.95743e-32
ENSG00000250687.5	8.79333	-2.02659	0.167662	-12.0874	1.23185e-33	5.11844e-32
ENSG00000211724.3	25.0201	-2.7526	0.227778	-12.0846	1.27406e-33	5.28347e-32
ENSG00000105501.10	29.4057	-1.92496	0.159337	-12.081	1.33013e-33	5.50522e-32
ENSG00000180096.10	1517	-1.85324	0.153498	-12.0734	1.45962e-33	6.02942e-32
ENSG00000280111.1	229.837	-1.6096	0.133363	-12.0693	1.53402e-33	6.32439e-32
ENSG00000249978.1	11.5353	-2.30401	0.190952	-12.0659	1.59866e-33	6.57809e-32
ENSG00000012779.9	975.371	-1.8807	0.156061	-12.0511	1.91437e-33	7.8619e-32
ENSG00000237702.2	32.379	-2.62532	0.217878	-12.0495	1.95101e-33	7.99689e-32
ENSG00000259772.5	106.384	-2.65951	0.220749	-12.0477	1.9949e-33	8.16101e-32
ENSG00000142347.15	2318.17	-1.79759	0.149273	-12.0423	2.12996e-33	8.69673e-32
ENSG00000081320.9	2298.91	-1.78618	0.148381	-12.0378	2.2478e-33	9.16021e-32
ENSG00000103257.7	59756.3	1.76812	0.1469	12.0362	2.29314e-33	9.32704e-32
ENSG00000138964.15	1414.91	-1.8698	0.15543	-12.0299	2.47602e-33	1.00516e-31
ENSG00000134070.4	278.851	-1.44541	0.120167	-12.0283	2.52322e-33	1.02236e-31
ENSG00000143185.3	79.1687	-2.51822	0.209399	-12.0259	2.59697e-33	1.05024e-31
ENSG00000167291.14	25031.9	1.59469	0.132633	12.0233	2.68011e-33	1.08179e-31
ENSG00000211788.2	47.8508	-2.67256	0.222334	-12.0205	2.77236e-33	1.1169e-31
ENSG00000147168.11	3943.15	-2.22978	0.185685	-12.0084	3.20982e-33	1.29069e-31
ENSG00000211785.1	34.3141	-2.83318	0.235985	-12.0057	3.3148e-33	1.33038e-31
ENSG00000013725.13	1302.91	-2.16174	0.180111	-12.0022	3.45802e-33	1.38523e-31
ENSG00000115085.12	1146.19	-2.34158	0.195161	-11.9982	3.63056e-33	1.45161e-31
ENSG00000188452.12	623.222	-2.1095	0.175899	-11.9927	3.87924e-33	1.54812e-31
ENSG00000182463.14	244.273	-1.95326	0.162972	-11.9852	4.24711e-33	1.69174e-31
ENSG00000116353.14	1545.68	0.958694	0.0800008	11.9836	4.33357e-33	1.72294e-31
ENSG00000145365.10	554.32	-1.12118	0.0936179	-11.9762	4.73769e-33	1.88008e-31
ENSG00000165716.8	2385.43	1.90945	0.15948	11.973	4.92285e-33	1.94991e-31
ENSG00000198851.8	3272.49	-2.39233	0.19984	-11.9712	5.03042e-33	1.9888e-31
ENSG00000179583.16	3206.98	-2.08763	0.174524	-11.9618	5.63269e-33	2.22276e-31
ENSG00000161640.14	75.6614	-2.71933	0.227454	-11.9555	6.07643e-33	2.39341e-31
ENSG00000122224.16	426.747	-2.40442	0.201158	-11.9529	6.26983e-33	2.46501e-31
ENSG00000211772.7	3159.23	-2.37318	0.198657	-11.9461	6.80388e-33	2.67002e-31
ENSG00000101842.12	24.1682	-2.51575	0.21078	-11.9354	7.73775e-33	3.02922e-31
ENSG00000166710.16	177684	-1.41522	0.118574	-11.9353	7.7478e-33	3.02922e-31
ENSG00000134028.13	834.06	-2.84247	0.238183	-11.934	7.87324e-33	3.07259e-31
ENSG00000171860.4	1047.96	-1.74528	0.146339	-11.9263	8.63349e-33	3.36309e-31
ENSG00000211795.3	41.8584	-2.62197	0.2199	-11.9235	8.93212e-33	3.47304e-31
ENSG00000133106.13	1238.71	-1.97565	0.165888	-11.9095	1.05552e-32	4.09661e-31
ENSG00000214787.7	22.2496	-2.42679	0.204039	-11.8938	1.27524e-32	4.94033e-31
ENSG00000125347.12	6171.13	-1.86292	0.156845	-11.8775	1.54976e-32	5.99288e-31
ENSG00000177721.4	179.003	-1.57865	0.13301	-11.8686	1.72299e-32	6.65062e-31
ENSG00000162614.17	207.805	-1.85979	0.15684	-11.8579	1.9593e-32	7.549e-31
ENSG00000187912.10	102.199	-3.17357	0.267924	-11.845	2.28353e-32	8.78226e-31
ENSG00000155465.17	1522.99	-1.62622	0.13737	-11.8383	2.47461e-32	9.4999e-31
ENSG00000167613.14	2327.35	-1.8545	0.156722	-11.8331	2.63392e-32	1.00932e-30
ENSG00000180644.6	2531.36	-2.5036	0.211629	-11.8301	2.72697e-32	1.04309e-30
ENSG00000110079.15	884.161	-1.79702	0.151923	-11.8284	2.78276e-32	1.06251e-30
ENSG00000257221.1	12.2404	-2.34304	0.198097	-11.8277	2.80586e-32	1.06941e-30
ENSG00000275743.1	13.4987	-2.72472	0.230379	-11.8271	2.82751e-32	1.07572e-30
ENSG00000157017.14	38.1328	-1.90924	0.161481	-11.8233	2.95879e-32	1.12365e-30
ENSG00000265206.3	194.944	-2.52833	0.213872	-11.8217	3.01512e-32	1.14263e-30
ENSG00000133321.9	2792.95	-2.3544	0.199161	-11.8216	3.01955e-32	1.14263e-30
ENSG00000163297.15	1401.89	-1.56781	0.132663	-11.818	3.1495e-32	1.18968e-30
ENSG00000124102.4	1086.68	4.78152	0.404747	11.8136	3.32022e-32	1.25194e-30
ENSG00000112406.4	1489.68	-1.06416	0.0901314	-11.8067	3.60409e-32	1.35656e-30
ENSG00000096996.14	803.673	-1.99494	0.169209	-11.7898	4.40839e-32	1.65635e-30
ENSG00000197471.10	1499.01	-2.14453	0.181981	-11.7843	4.70112e-32	1.76321e-30
ENSG00000259004.1	16.1025	-1.82775	0.155239	-11.7738	5.32721e-32	1.9945e-30
ENSG00000205885.6	94.0073	-1.89568	0.161015	-11.7733	5.35684e-32	2.00206e-30
ENSG00000090382.5	11264.7	-2.37515	0.202026	-11.7567	6.52604e-32	2.43474e-30
ENSG00000146215.12	20.0447	-3.19652	0.272	-11.7519	6.90422e-32	2.57131e-30
ENSG00000211776.2	24.3953	-2.66456	0.226822	-11.7474	7.28261e-32	2.70747e-30
ENSG00000227495.1	11.5656	-1.56899	0.133579	-11.7458	7.42435e-32	2.75533e-30
ENSG00000159314.10	1100.07	-1.30689	0.111295	-11.7425	7.71551e-32	2.85838e-30
ENSG00000226979.7	133.315	-2.34496	0.199972	-11.7265	9.32694e-32	3.44934e-30
ENSG00000134508.11	12102.8	1.63357	0.139309	11.7262	9.35719e-32	3.4545e-30
ENSG00000128271.18	21.1693	-1.84642	0.157503	-11.7231	9.70729e-32	3.57752e-30
ENSG00000232912.4	7.55336	-2.17544	0.185604	-11.7209	9.9651e-32	3.66615e-30
ENSG00000244682.6	505.398	-2.62822	0.224246	-11.7203	1.00369e-31	3.68617e-30
ENSG00000211727.3	23.4999	-2.67194	0.228034	-11.7173	1.03951e-31	3.81113e-30
ENSG00000224220.1	14.3197	-2.98393	0.254758	-11.7128	1.0963e-31	4.0124e-30
ENSG00000276557.1	29.8894	-2.59803	0.221858	-11.7103	1.12864e-31	4.12364e-30
ENSG00000147570.8	88.9354	-2.46328	0.210469	-11.7038	1.21892e-31	4.4458e-30
ENSG00000169413.2	978.885	-1.7296	0.147853	-11.6981	1.30279e-31	4.74354e-30
ENSG00000108700.4	334.838	-2.42783	0.207637	-11.6927	1.38932e-31	5.04992e-30
ENSG00000178695.5	3833.37	-1.48122	0.126699	-11.6908	1.42012e-31	5.15304e-30
ENSG00000141469.15	53.8584	-2.27544	0.194661	-11.6892	1.44708e-31	5.24188e-30
ENSG00000198121.12	528.509	-2.19463	0.18776	-11.6885	1.45952e-31	5.27795e-30
ENSG00000176058.10	1902.02	1.43369	0.122673	11.6871	1.48406e-31	5.35753e-30
ENSG00000224137.1	82.3213	-2.64561	0.226446	-11.6832	1.55418e-31	5.60111e-30
ENSG00000211810.3	26.9886	-2.61924	0.224209	-11.6821	1.57279e-31	5.65859e-30
ENSG00000112299.7	102.798	-2.2011	0.188439	-11.6807	1.59944e-31	5.74471e-30
ENSG00000232869.2	73.5819	-2.7639	0.236746	-11.6745	1.72048e-31	6.16897e-30
ENSG00000197943.8	1742.88	-1.53661	0.131626	-11.6741	1.72913e-31	6.18952e-30
ENSG00000073605.17	225.635	-1.81513	0.155556	-11.6687	1.84258e-31	6.5845e-30
ENSG00000189350.11	75.8786	-2.00662	0.171981	-11.6677	1.86371e-31	6.6488e-30
ENSG00000256069.6	15.0598	-2.38014	0.204104	-11.6614	2.00669e-31	7.14683e-30
ENSG00000100918.11	385.121	-1.49881	0.12854	-11.6603	2.03424e-31	7.23282e-30
ENSG00000153993.12	436.73	-3.13056	0.26851	-11.659	2.06408e-31	7.32178e-30
ENSG00000003436.13	675.658	-1.70755	0.146458	-11.6589	2.06617e-31	7.32178e-30
ENSG00000147443.11	1074.25	-1.81431	0.155782	-11.6465	2.39115e-31	8.45924e-30
ENSG00000157734.12	534.068	-2.13658	0.183502	-11.6434	2.48031e-31	8.76003e-30
ENSG00000047457.12	300.672	-2.74915	0.236278	-11.6353	2.72775e-31	9.61793e-30
ENSG00000015285.9	1697.29	-1.85583	0.159647	-11.6246	3.0913e-31	1.0878e-29
ENSG00000087237.9	456.184	-2.62306	0.22565	-11.6245	3.09538e-31	1.0878e-29
ENSG00000173578.7	183.751	-2.33832	0.20118	-11.623	3.14798e-31	1.10445e-29
ENSG00000110852.4	744.451	-1.59235	0.137017	-11.6215	3.20433e-31	1.12236e-29
ENSG00000227155.6	11.101	-2.23829	0.192623	-11.6201	3.259e-31	1.13963e-29
ENSG00000255733.4	24.5865	-3.30133	0.284226	-11.6152	3.45129e-31	1.20488e-29
ENSG00000163947.10	1371.68	-1.18185	0.101787	-11.611	3.62241e-31	1.26254e-29
ENSG00000156113.19	603.389	-2.12096	0.182736	-11.6067	3.81005e-31	1.32576e-29
ENSG00000255197.4	72.3789	-1.61974	0.139646	-11.5989	4.17349e-31	1.44984e-29
ENSG00000076662.8	278.099	-2.29241	0.197669	-11.5972	4.25824e-31	1.47686e-29
ENSG00000122140.9	4042.32	1.35932	0.117225	11.5958	4.32723e-31	1.49834e-29
ENSG00000157303.9	293.558	-2.04374	0.176313	-11.5916	4.5464e-31	1.57166e-29
ENSG00000127084.16	1103	-1.78007	0.153591	-11.5897	4.64814e-31	1.60421e-29
ENSG00000235304.1	18.7452	-2.45744	0.212236	-11.5788	5.27885e-31	1.81893e-29
ENSG00000128340.13	5698.26	-1.96373	0.169695	-11.5721	5.7061e-31	1.96295e-29
ENSG00000155629.13	1914.05	-1.89008	0.163337	-11.5717	5.73593e-31	1.97002e-29
ENSG00000221963.5	5554.13	-1.64721	0.142365	-11.5704	5.824e-31	1.99703e-29
ENSG00000224429.6	36.8045	-1.42143	0.122869	-11.5687	5.94075e-31	2.03377e-29
ENSG00000143297.17	663.531	-3.20141	0.276992	-11.5578	6.74528e-31	2.30547e-29
ENSG00000133805.14	608.043	-1.47746	0.127896	-11.5521	7.20252e-31	2.45779e-29
ENSG00000232613.5	27.5577	-2.59636	0.224769	-11.5512	7.27874e-31	2.4798e-29
ENSG00000137868.17	1097.1	-2.76654	0.239681	-11.5426	8.04391e-31	2.73398e-29
ENSG00000174749.5	298.395	-1.40997	0.122154	-11.5425	8.05059e-31	2.73398e-29
ENSG00000171049.8	54.8513	-2.32139	0.201164	-11.5398	8.31188e-31	2.81819e-29
ENSG00000182108.8	633.257	1.28091	0.111037	11.5358	8.70402e-31	2.94644e-29
ENSG00000150337.12	527.162	-2.04446	0.177246	-11.5346	8.82903e-31	2.98399e-29
ENSG00000128973.10	7613.32	1.3279	0.115142	11.5327	9.02705e-31	3.04605e-29
ENSG00000182578.12	4517.43	-1.82185	0.157987	-11.5317	9.13472e-31	3.07702e-29
ENSG00000147027.3	405.241	-2.39502	0.207693	-11.5316	9.14785e-31	3.07702e-29
ENSG00000153253.14	34.2158	-2.88781	0.250468	-11.5297	9.35227e-31	3.14079e-29
ENSG00000102245.6	119.485	-2.64804	0.229684	-11.529	9.41982e-31	3.15847e-29
ENSG00000262823.1	17.6899	-2.32779	0.201956	-11.5262	9.73348e-31	3.25848e-29
ENSG00000270605.1	51.0478	-1.8425	0.159902	-11.5227	1.01416e-30	3.38976e-29
ENSG00000105246.5	307.511	-2.06921	0.179612	-11.5205	1.04059e-30	3.47262e-29
ENSG00000091592.14	1324.95	-1.58859	0.137926	-11.5177	1.07443e-30	3.5799e-29
ENSG00000204475.8	94.0313	-2.3574	0.20478	-11.5119	1.14984e-30	3.82517e-29
ENSG00000100450.11	579.866	-2.54658	0.221423	-11.501	1.30396e-30	4.33106e-29
ENSG00000086288.10	22.1296	-2.55911	0.222567	-11.4981	1.34784e-30	4.46982e-29
ENSG00000132514.12	525.7	-2.23268	0.194262	-11.4932	1.42765e-30	4.72709e-29
ENSG00000136404.14	95.1774	-1.77587	0.154591	-11.4875	1.52419e-30	5.03885e-29
ENSG00000115738.8	1393.84	-1.26315	0.110098	-11.4729	1.80509e-30	5.9582e-29
ENSG00000104974.9	95.8421	-2.04677	0.17842	-11.4716	1.8324e-30	6.03895e-29
ENSG00000132465.9	8361.37	-3.15392	0.274992	-11.4691	1.88567e-30	6.20484e-29
ENSG00000171659.12	223.175	-2.0689	0.180476	-11.4636	2.01088e-30	6.6066e-29
ENSG00000225720.5	17.781	-2.29593	0.200303	-11.4623	2.04083e-30	6.69461e-29
ENSG00000265743.1	63.7055	-1.58678	0.138447	-11.4613	2.06381e-30	6.75953e-29
ENSG00000125910.5	403.529	-2.08096	0.181576	-11.4605	2.0827e-30	6.81087e-29
ENSG00000150782.10	613.619	-2.00796	0.175375	-11.4495	2.36446e-30	7.72037e-29
ENSG00000205436.6	95.4678	-2.72901	0.238367	-11.4488	2.38557e-30	7.77732e-29
ENSG00000211792.2	26.2895	-2.61378	0.228514	-11.4381	2.69587e-30	8.77545e-29
ENSG00000279631.1	16.357	-2.23124	0.195179	-11.4318	2.90161e-30	9.43067e-29
ENSG00000038945.13	1574.55	-1.98062	0.173308	-11.4283	3.01793e-30	9.7937e-29
ENSG00000174837.13	109.812	-2.21246	0.193697	-11.4223	3.23612e-30	1.04857e-28
ENSG00000140280.12	561.114	-1.05588	0.0924741	-11.4181	3.39717e-30	1.09908e-28
ENSG00000226806.1	9.67218	-2.34283	0.205467	-11.4024	4.06604e-30	1.31347e-28
ENSG00000139193.3	1202.39	-2.33349	0.204749	-11.3968	4.33569e-30	1.39844e-28
ENSG00000187037.7	40.7979	-2.13661	0.187498	-11.3954	4.4098e-30	1.42018e-28
ENSG00000134545.12	38.429	-2.64662	0.232313	-11.3925	4.55694e-30	1.46534e-28
ENSG00000211806.2	11.4845	-2.60796	0.229039	-11.3865	4.88006e-30	1.56687e-28
ENSG00000243836.4	19.7825	-2.15058	0.188877	-11.3862	4.90141e-30	1.57134e-28
ENSG00000164484.10	165.111	-1.98605	0.174443	-11.3851	4.96233e-30	1.58847e-28
ENSG00000182836.8	49.8322	-3.63118	0.319003	-11.3829	5.08682e-30	1.62587e-28
ENSG00000023445.12	2353.78	-2.4098	0.211746	-11.3806	5.22116e-30	1.66629e-28
ENSG00000145569.5	393.638	-1.99814	0.175657	-11.3752	5.5564e-30	1.77061e-28
ENSG00000179840.5	10.1546	-2.08752	0.183537	-11.3739	5.64389e-30	1.79579e-28
ENSG00000118495.17	254.304	-1.71615	0.150988	-11.3661	6.16475e-30	1.95858e-28
ENSG00000049759.15	8349.78	1.37877	0.121339	11.363	6.39168e-30	2.02764e-28
ENSG00000151490.12	191.719	-1.78275	0.156903	-11.3621	6.45738e-30	2.04542e-28
ENSG00000105251.9	18.384	-2.80179	0.246908	-11.3475	7.63101e-30	2.41356e-28
ENSG00000173221.12	1002.03	-1.19516	0.105363	-11.3432	8.01147e-30	2.53012e-28
ENSG00000198879.10	828.249	-1.41544	0.124814	-11.3404	8.2763e-30	2.60987e-28
ENSG00000160255.15	10967.7	-1.96082	0.172911	-11.3401	8.30818e-30	2.61603e-28
ENSG00000187546.12	215.018	-3.42232	0.301797	-11.3398	8.33105e-30	2.61934e-28
ENSG00000230537.1	20.0679	-2.35	0.207304	-11.336	8.69827e-30	2.73074e-28
ENSG00000019991.14	176.729	-1.88155	0.16602	-11.3332	8.98167e-30	2.81554e-28
ENSG00000198796.6	127.047	-2.2596	0.199397	-11.3322	9.09301e-30	2.84623e-28
ENSG00000227507.2	1629.21	-2.49062	0.220124	-11.3146	1.11106e-29	3.47263e-28
ENSG00000113594.8	500.644	-2.50123	0.22109	-11.3132	1.12941e-29	3.52479e-28
ENSG00000164674.14	391.532	-1.41471	0.125075	-11.3109	1.15914e-29	3.61225e-28
ENSG00000186074.17	277.772	-1.90803	0.168769	-11.3056	1.23122e-29	3.83126e-28
ENSG00000259641.4	26.795	-2.72304	0.240898	-11.3037	1.25775e-29	3.90807e-28
ENSG00000211815.3	10.5285	-2.56094	0.226616	-11.3008	1.30021e-29	4.03409e-28
ENSG00000154978.11	1733.55	-1.51826	0.134378	-11.2984	1.33619e-29	4.13965e-28
ENSG00000163382.10	9757.85	1.37168	0.121434	11.2957	1.37854e-29	4.26407e-28
ENSG00000055483.18	5336.82	0.843689	0.0746922	11.2955	1.38037e-29	4.26407e-28
ENSG00000270426.1	15.4477	-1.59345	0.141112	-11.2921	1.43598e-29	4.42938e-28
ENSG00000232788.1	11.9802	-1.89583	0.167938	-11.2889	1.48956e-29	4.58799e-28
ENSG00000028137.15	4838.25	-1.57426	0.139566	-11.2797	1.65353e-29	5.08562e-28
ENSG00000131401.10	1093.43	-2.22772	0.197615	-11.273	1.78314e-29	5.47632e-28
ENSG00000011478.10	2528.78	1.31866	0.117036	11.2671	1.90716e-29	5.84871e-28
ENSG00000174600.12	1548.06	-1.75662	0.155912	-11.2667	1.91639e-29	5.86852e-28
ENSG00000116221.14	6667.9	0.998416	0.0886242	11.2657	1.93743e-29	5.92441e-28
ENSG00000180139.11	40.7177	-1.82282	0.161928	-11.257	2.14033e-29	6.5354e-28
ENSG00000092421.15	8675.34	1.87573	0.166674	11.2539	2.21668e-29	6.75879e-28
ENSG00000162687.15	21.8768	-2.38197	0.211778	-11.2475	2.38315e-29	7.25593e-28
ENSG00000167634.11	23.3352	-2.38933	0.212733	-11.2316	2.85391e-29	8.6768e-28
ENSG00000112195.8	82.2251	-3.03287	0.270203	-11.2244	3.094e-29	9.38029e-28
ENSG00000230006.6	182.407	-2.71929	0.242266	-11.2244	3.09415e-29	9.38029e-28
ENSG00000237372.2	10.9203	-2.13036	0.189832	-11.2224	3.16721e-29	9.58806e-28
ENSG00000164051.12	1306.37	0.832868	0.0742422	11.2183	3.31757e-29	1.00289e-27
ENSG00000125637.14	1969.87	-1.83032	0.163182	-11.2164	3.3868e-29	1.02236e-27
ENSG00000117419.13	3682.92	0.877658	0.0782565	11.2151	3.43645e-29	1.03465e-27
ENSG00000102174.8	126.586	-2.19558	0.19577	-11.2151	3.43728e-29	1.03465e-27
ENSG00000116473.13	3187.2	-0.863317	0.0769936	-11.2129	3.52647e-29	1.05999e-27
ENSG00000113263.11	828.717	-1.99751	0.17825	-11.2062	3.80101e-29	1.1409e-27
ENSG00000059377.14	1197.25	-1.59435	0.14265	-11.1766	5.30598e-29	1.59037e-27
ENSG00000139194.6	333.64	-2.28419	0.204452	-11.1722	5.57549e-29	1.66879e-27
ENSG00000179088.13	15.7569	-2.33777	0.209338	-11.1674	5.88536e-29	1.75905e-27
ENSG00000163406.9	107.222	-1.99335	0.178506	-11.1668	5.92577e-29	1.76863e-27
ENSG00000158483.14	562.858	1.1858	0.106213	11.1644	6.08958e-29	1.81497e-27
ENSG00000241657.1	29.3326	-2.65389	0.237759	-11.1621	6.24817e-29	1.85962e-27
ENSG00000198520.9	149.244	-1.83245	0.164345	-11.15	7.1585e-29	2.12757e-27
ENSG00000003400.13	644.318	-1.27712	0.114564	-11.1476	7.35746e-29	2.18364e-27
ENSG00000182183.13	70.4436	-2.21544	0.198802	-11.144	7.66185e-29	2.2708e-27
ENSG00000111801.14	2572.14	-1.24957	0.112204	-11.1366	8.31995e-29	2.4624e-27
ENSG00000211805.1	15.3556	-2.73134	0.245362	-11.1319	8.77663e-29	2.59394e-27
ENSG00000152766.5	409.104	-2.44489	0.219833	-11.1216	9.85132e-29	2.90751e-27
ENSG00000176907.4	259.999	-1.7383	0.156427	-11.1125	1.09065e-28	3.21446e-27
ENSG00000166002.5	579.635	-1.24973	0.112557	-11.1031	1.21182e-28	3.56662e-27
ENSG00000115267.5	1961.76	-1.53852	0.138639	-11.0973	1.29241e-28	3.7943e-27
ENSG00000120659.13	92.271	-2.75075	0.247876	-11.0973	1.29276e-28	3.7943e-27
ENSG00000155962.11	674.262	-2.05163	0.184903	-11.0957	1.31573e-28	3.85639e-27
ENSG00000081052.11	251.696	-1.96651	0.177308	-11.091	1.38783e-28	4.0621e-27
ENSG00000112799.7	561.986	-1.8072	0.162986	-11.0881	1.43371e-28	4.19059e-27
ENSG00000169031.17	83.5521	-2.48677	0.224528	-11.0756	1.64855e-28	4.8119e-27
ENSG00000105383.13	300.142	-1.7118	0.154763	-11.0608	1.94298e-28	5.6635e-27
ENSG00000065357.18	1660.14	-1.60455	0.145131	-11.0558	2.05417e-28	5.97939e-27
ENSG00000127311.8	408.498	-1.06573	0.0964023	-11.055	2.07243e-28	6.02427e-27
ENSG00000100079.6	202.872	-2.11764	0.191559	-11.0548	2.0786e-28	6.03392e-27
ENSG00000120949.13	131.661	-1.61118	0.145798	-11.0508	2.17223e-28	6.2971e-27
ENSG00000188011.5	34.5392	-2.68251	0.242814	-11.0476	2.25119e-28	6.51708e-27
ENSG00000136295.13	37943.3	1.75239	0.158641	11.0463	2.28456e-28	6.60465e-27
ENSG00000181908.5	19.9181	-1.75968	0.159309	-11.0458	2.29806e-28	6.63462e-27
ENSG00000179934.6	26.812	-2.35113	0.212955	-11.0405	2.43725e-28	7.0269e-27
ENSG00000162729.12	18807.3	1.55793	0.141233	11.0309	2.71062e-28	7.80444e-27
ENSG00000180828.2	90.5669	-2.36212	0.214228	-11.0262	2.85698e-28	8.21469e-27
ENSG00000114978.16	6043.04	-0.868968	0.0788138	-11.0256	2.87629e-28	8.25901e-27
ENSG00000225217.1	834.612	-2.3026	0.208999	-11.0173	3.15421e-28	9.04477e-27
ENSG00000205268.9	1196.76	-1.23229	0.111884	-11.014	3.27143e-28	9.36822e-27
ENSG00000172543.6	1049.47	-2.16065	0.196198	-11.0126	3.32153e-28	9.49884e-27
ENSG00000160214.11	3611.48	0.97335	0.0884106	11.0094	3.44176e-28	9.82942e-27
ENSG00000100336.16	657.419	-1.90228	0.172801	-11.0085	3.47673e-28	9.91593e-27
ENSG00000030419.15	283.544	-1.88267	0.171244	-10.9941	4.07975e-28	1.16202e-26
ENSG00000104970.9	15.2026	-2.42351	0.220442	-10.9939	4.09086e-28	1.16362e-26
ENSG00000121966.6	4231.18	-1.83662	0.167074	-10.9928	4.13676e-28	1.1751e-26
ENSG00000064012.20	1237.16	-0.933018	0.0848834	-10.9918	4.18711e-28	1.18781e-26
ENSG00000162341.14	4874.68	1.91478	0.174223	10.9904	4.25236e-28	1.2047e-26
ENSG00000248441.5	45.17	-1.87661	0.170939	-10.9783	4.8624e-28	1.37569e-26
ENSG00000105374.8	2577.86	-2.46997	0.225168	-10.9695	5.35948e-28	1.5143e-26
ENSG00000105649.8	721.261	1.55189	0.141637	10.9568	6.16457e-28	1.73946e-26
ENSG00000143631.10	731.816	3.04464	0.278172	10.9452	7.00644e-28	1.97438e-26
ENSG00000223865.9	25899.8	-1.79919	0.164429	-10.942	7.2556e-28	2.04143e-26
ENSG00000108828.14	64694	1.28309	0.117264	10.9419	7.26362e-28	2.04143e-26
ENSG00000188822.7	144.091	-3.35778	0.306942	-10.9395	7.46434e-28	2.09506e-26
ENSG00000213658.9	60.1792	-1.73295	0.158439	-10.9376	7.61711e-28	2.13511e-26
ENSG00000204482.9	905.173	-1.64115	0.150091	-10.9344	7.89342e-28	2.20964e-26
ENSG00000163823.3	1043.76	-1.61592	0.147848	-10.9296	8.31735e-28	2.32524e-26
ENSG00000168334.8	305.932	-2.75713	0.252371	-10.9249	8.7607e-28	2.44596e-26
ENSG00000107738.18	2615.92	-1.46789	0.134373	-10.924	8.85494e-28	2.46664e-26
ENSG00000185215.7	3611.2	-1.44766	0.132522	-10.9239	8.85807e-28	2.46664e-26
ENSG00000167077.11	313.283	-1.8155	0.166206	-10.9232	8.92983e-28	2.48336e-26
ENSG00000275791.1	39.0819	-2.77174	0.254163	-10.9054	1.08661e-27	3.01787e-26
ENSG00000263264.1	60.4549	-2.79712	0.256535	-10.9035	1.10967e-27	3.07789e-26
ENSG00000106266.7	9583.84	1.20331	0.110376	10.9019	1.12826e-27	3.12534e-26
ENSG00000278195.1	45.621	-2.61432	0.23981	-10.9016	1.13254e-27	3.13311e-26
ENSG00000134627.10	83.9576	-1.38762	0.127367	-10.8947	1.22186e-27	3.37581e-26
ENSG00000117281.14	40.3062	-1.74508	0.160211	-10.8924	1.25322e-27	3.45793e-26
ENSG00000267731.1	13.1779	-2.55587	0.235054	-10.8735	1.5409e-27	4.24619e-26
ENSG00000163534.13	250.073	-3.78968	0.348552	-10.8726	1.55652e-27	4.28366e-26
ENSG00000231346.4	12.7436	-1.61403	0.148481	-10.8703	1.59729e-27	4.39016e-26
ENSG00000165359.13	689.79	-1.58407	0.145787	-10.8656	1.68035e-27	4.61246e-26
ENSG00000010610.8	6305.74	-1.73541	0.159802	-10.8597	1.79287e-27	4.91496e-26
ENSG00000276953.1	28.0064	-2.57553	0.237205	-10.8578	1.8303e-27	5.01111e-26
ENSG00000214160.8	5416.08	1.14132	0.105128	10.8564	1.85887e-27	5.08276e-26
ENSG00000112578.8	2549.53	0.867015	0.0798666	10.8558	1.87159e-27	5.10437e-26
ENSG00000205744.8	1265.49	-1.72467	0.158871	-10.8558	1.8716e-27	5.10437e-26
ENSG00000104894.10	3319.11	-2.04217	0.18819	-10.8517	1.95855e-27	5.33466e-26
ENSG00000221817.8	124.353	-1.04711	0.0964984	-10.8511	1.97091e-27	5.36143e-26
ENSG00000234518.2	184.41	-1.3445	0.123986	-10.844	2.12998e-27	5.78672e-26
ENSG00000101336.11	1636.04	-1.59971	0.147543	-10.8423	2.16904e-27	5.88529e-26
ENSG00000170379.18	274.436	-1.56161	0.144078	-10.8386	2.2578e-27	6.11828e-26
ENSG00000211714.3	22.9812	-2.34111	0.216047	-10.8361	2.32118e-27	6.28201e-26
ENSG00000167664.7	37.8513	-2.42554	0.223903	-10.8329	2.40288e-27	6.49482e-26
ENSG00000180616.7	116.95	-1.50791	0.139265	-10.8276	2.5475e-27	6.87695e-26
ENSG00000132334.15	1063.67	-1.41595	0.130792	-10.826	2.59296e-27	6.99077e-26
ENSG00000226660.2	35.2786	-2.58404	0.238731	-10.8241	2.64781e-27	7.12957e-26
ENSG00000159110.18	1075.66	-0.773498	0.0714798	-10.8212	2.73137e-27	7.34524e-26
ENSG00000250722.4	1436.93	-2.13482	0.197469	-10.8109	3.05581e-27	8.20732e-26
ENSG00000268758.4	30.893	-2.15037	0.199115	-10.7996	3.45643e-27	9.27155e-26
ENSG00000075415.11	23501.4	0.679971	0.0629742	10.7976	3.53243e-27	9.46344e-26
ENSG00000160883.9	648.223	-1.8503	0.171385	-10.7962	3.58821e-27	9.60073e-26
ENSG00000058091.15	608.689	-1.6905	0.156585	-10.796	3.59395e-27	9.60397e-26
ENSG00000049192.13	89.9702	-2.05309	0.190318	-10.7877	3.93591e-27	1.05045e-25
ENSG00000256948.1	22.1747	-2.66422	0.24744	-10.7671	4.92253e-27	1.31212e-25
ENSG00000224389.7	301.55	-2.33928	0.217276	-10.7664	4.96151e-27	1.32085e-25
ENSG00000174885.11	48.5828	-1.92703	0.179036	-10.7634	5.12634e-27	1.36301e-25
ENSG00000130821.14	14825.8	1.27122	0.118135	10.7608	5.27097e-27	1.39971e-25
ENSG00000237339.4	1437.34	4.68228	0.435802	10.744	6.32105e-27	1.67508e-25
ENSG00000236383.6	44.7684	-1.03358	0.0962003	-10.744	6.32373e-27	1.67508e-25
ENSG00000071073.11	1416.64	-1.256	0.117004	-10.7346	7.00177e-27	1.85236e-25
ENSG00000223552.1	25.8178	-1.78736	0.166521	-10.7335	7.08427e-27	1.87186e-25
ENSG00000056558.9	3142.74	-1.6458	0.153358	-10.7317	7.22385e-27	1.90636e-25
ENSG00000104826.10	78.7784	2.31792	0.216132	10.7246	7.80492e-27	2.05714e-25
ENSG00000154065.15	182.267	-1.85862	0.173336	-10.7226	7.9711e-27	2.09833e-25
ENSG00000269743.2	162.842	-0.765047	0.0713652	-10.7202	8.18638e-27	2.15233e-25
ENSG00000163492.12	74.7954	-2.53193	0.236214	-10.7188	8.30645e-27	2.18119e-25
ENSG00000211809.2	13.7915	-2.38427	0.222466	-10.7174	8.4319e-27	2.21139e-25
ENSG00000025434.17	1994.23	-1.26927	0.118465	-10.7143	8.72061e-27	2.28428e-25
ENSG00000205403.11	1191.46	-2.15152	0.200821	-10.7136	8.78491e-27	2.29828e-25
ENSG00000113302.4	10.652	-2.16705	0.20229	-10.7126	8.88556e-27	2.32175e-25
ENSG00000186088.14	829.405	-1.44892	0.135267	-10.7116	8.98287e-27	2.34429e-25
ENSG00000211797.2	33.2864	-2.41743	0.225852	-10.7036	9.78962e-27	2.55168e-25
ENSG00000119535.16	792.944	-1.56051	0.145941	-10.6928	1.10052e-26	2.86501e-25
ENSG00000106236.3	1351.34	-3.55304	0.33236	-10.6903	1.12962e-26	2.93715e-25
ENSG00000115271.9	709.475	-0.941254	0.0880534	-10.6896	1.13882e-26	2.95744e-25
ENSG00000142961.13	966.135	-0.680038	0.0636318	-10.6871	1.16989e-26	3.0344e-25
ENSG00000186818.11	2463.42	-2.0502	0.191872	-10.6852	1.19335e-26	3.09146e-25
ENSG00000237988.3	861.871	-2.63355	0.246521	-10.6829	1.22436e-26	3.16793e-25
ENSG00000136286.13	1399.1	-1.76466	0.165256	-10.6784	1.28527e-26	3.32148e-25
ENSG00000002822.14	8696.13	1.36171	0.127589	10.6726	1.36743e-26	3.5295e-25
ENSG00000135899.15	645.516	-0.967473	0.0906557	-10.6719	1.37715e-26	3.55028e-25
ENSG00000137203.9	17835.6	1.65333	0.154936	10.6711	1.39022e-26	3.5796e-25
ENSG00000251442.4	106.851	-1.66731	0.156327	-10.6655	1.47578e-26	3.79531e-25
ENSG00000141574.6	1456.61	-1.86629	0.175067	-10.6604	1.55943e-26	4.00556e-25
ENSG00000163468.13	24514.7	0.780651	0.0732378	10.6591	1.58073e-26	4.05535e-25
ENSG00000117215.13	1693.93	-3.09097	0.29006	-10.6563	1.62949e-26	4.1754e-25
ENSG00000130669.16	6112.41	1.27877	0.120033	10.6535	1.67967e-26	4.29877e-25
ENSG00000225963.6	55.5088	-1.34657	0.126406	-10.6527	1.6934e-26	4.32868e-25
ENSG00000261971.5	344.516	-1.27748	0.119965	-10.6487	1.76759e-26	4.5129e-25
ENSG00000280194.1	69.2282	-1.2763	0.119859	-10.6483	1.77581e-26	4.52842e-25
ENSG00000015133.17	1215.71	-1.62012	0.152154	-10.6479	1.78379e-26	4.5433e-25
ENSG00000276819.1	15.882	-2.51251	0.236064	-10.6433	1.873e-26	4.7648e-25
ENSG00000152767.14	6457.54	1.29391	0.121593	10.6413	1.91513e-26	4.86612e-25
ENSG00000180061.8	174.74	-1.80848	0.169983	-10.6392	1.95807e-26	4.96927e-25
ENSG00000168386.17	777.241	-1.62411	0.152659	-10.6388	1.96618e-26	4.98389e-25
ENSG00000065809.12	1964.93	-1.50593	0.141657	-10.6308	2.14233e-26	5.4239e-25
ENSG00000139597.15	508.754	-1.40564	0.13224	-10.6294	2.17479e-26	5.49951e-25
ENSG00000231964.1	7.76931	-2.18035	0.205188	-10.6261	2.25322e-26	5.69105e-25
ENSG00000116852.13	930.836	-1.61912	0.152444	-10.6211	2.37811e-26	5.99934e-25
ENSG00000147894.13	409.523	-1.17261	0.11042	-10.6196	2.41703e-26	6.0903e-25
ENSG00000110448.9	989.568	-2.14831	0.202413	-10.6135	2.57908e-26	6.4909e-25
ENSG00000274752.1	13.8515	-2.50747	0.236272	-10.6127	2.60195e-26	6.54069e-25
ENSG00000273837.1	32.6813	-2.07554	0.195587	-10.6118	2.62522e-26	6.59135e-25
ENSG00000178977.3	131.634	-1.13387	0.106861	-10.6107	2.65699e-26	6.66323e-25
ENSG00000026297.14	2306.83	-1.1742	0.110722	-10.605	2.82609e-26	7.07893e-25
ENSG00000100100.11	1726.59	-1.41213	0.13317	-10.604	2.85618e-26	7.14585e-25
ENSG00000220008.3	26.0583	-2.40834	0.227128	-10.6034	2.87272e-26	7.17875e-25
ENSG00000180263.12	345.912	-1.27104	0.119944	-10.597	3.07843e-26	7.68374e-25
ENSG00000139187.8	124.516	-1.33424	0.12595	-10.5934	3.19805e-26	7.97292e-25
ENSG00000083454.20	248.41	-2.53537	0.239359	-10.5923	3.23442e-26	8.05413e-25
ENSG00000166897.13	130.032	3.4539	0.326679	10.5728	3.98567e-26	9.9132e-25
ENSG00000153162.8	145.772	-1.87687	0.177541	-10.5714	4.04202e-26	1.00415e-24
ENSG00000260306.1	13.4072	-1.97308	0.186761	-10.5647	4.34266e-26	1.07758e-24
ENSG00000130717.11	3131.81	1.05086	0.099505	10.5609	4.5226e-26	1.12092e-24
ENSG00000159307.17	306.659	3.27086	0.309768	10.5591	4.61164e-26	1.14165e-24
ENSG00000177455.10	604.473	-3.08344	0.292129	-10.5551	4.81289e-26	1.19008e-24
ENSG00000248099.3	21.2258	-1.90262	0.180463	-10.543	5.47268e-26	1.35165e-24
ENSG00000241294.1	697.106	-3.61541	0.342972	-10.5414	5.56564e-26	1.37301e-24
ENSG00000111110.10	2653.07	1.36386	0.129395	10.5403	5.6324e-26	1.38786e-24
ENSG00000247287.2	20.2005	-1.6103	0.15281	-10.538	5.77358e-26	1.421e-24
ENSG00000138722.8	274.388	-2.71537	0.25789	-10.5292	6.33918e-26	1.5584e-24
ENSG00000278030.1	99.0911	-2.49535	0.23717	-10.5213	6.89016e-26	1.69188e-24
ENSG00000169896.15	1094.96	-1.57083	0.149313	-10.5204	6.95955e-26	1.70694e-24
ENSG00000186395.6	6757.45	2.72922	0.25943	10.5201	6.98275e-26	1.71065e-24
ENSG00000269086.2	21.0049	-2.35282	0.223684	-10.5185	7.09942e-26	1.73723e-24
ENSG00000235576.1	61.6148	-2.34057	0.2226	-10.5147	7.3951e-26	1.80749e-24
ENSG00000123454.9	37.8528	-2.06153	0.196182	-10.5082	7.91696e-26	1.93282e-24
ENSG00000166886.11	4341.58	0.959955	0.0913699	10.5063	8.08414e-26	1.97136e-24
ENSG00000127472.9	99.0112	-2.27856	0.216958	-10.5023	8.42796e-26	2.05284e-24
ENSG00000103249.16	21108.5	1.22551	0.116738	10.4979	8.83176e-26	2.14872e-24
ENSG00000211804.3	12.7386	-2.54015	0.242037	-10.4949	9.11944e-26	2.21617e-24
ENSG00000186230.6	649.254	1.66603	0.158769	10.4934	9.26489e-26	2.24794e-24
ENSG00000143110.10	1151.88	-1.61043	0.153472	-10.4933	9.27138e-26	2.24794e-24
ENSG00000173638.17	2467.39	1.22321	0.11663	10.488	9.8107e-26	2.37598e-24
ENSG00000101342.8	52.4765	-1.56155	0.148932	-10.485	1.01273e-25	2.44985e-24
ENSG00000108405.3	156.063	-2.13898	0.20413	-10.4785	1.08421e-25	2.61977e-24
ENSG00000115526.9	1595.59	0.931069	0.0888614	10.4778	1.09289e-25	2.63775e-24
ENSG00000156049.6	154.98	-2.22022	0.211939	-10.4757	1.11696e-25	2.69277e-24
ENSG00000152601.16	5863.92	-1.12275	0.10721	-10.4725	1.15566e-25	2.7829e-24
ENSG00000141759.13	3992.19	0.775777	0.0740907	10.4706	1.17853e-25	2.83477e-24
ENSG00000150636.14	235.447	-1.38227	0.132054	-10.4675	1.21854e-25	2.92768e-24
ENSG00000185880.11	3328.09	-1.0635	0.101623	-10.4652	1.24807e-25	2.99522e-24
ENSG00000088340.14	190.093	-2.25433	0.215417	-10.4649	1.25175e-25	3.00066e-24
ENSG00000100294.11	1419.86	1.09657	0.104846	10.4589	1.33464e-25	3.19574e-24
ENSG00000156381.7	2442.14	1.52048	0.14541	10.4565	1.36871e-25	3.27362e-24
ENSG00000105427.8	366.036	2.8757	0.275142	10.4517	1.43979e-25	3.43976e-24
ENSG00000196735.10	14434.2	-2.02164	0.193466	-10.4496	1.47148e-25	3.51149e-24
ENSG00000169692.11	6398.96	1.48626	0.142233	10.4495	1.47313e-25	3.51149e-24
ENSG00000173597.7	37.7764	-2.30731	0.22083	-10.4484	1.49089e-25	3.54983e-24
ENSG00000121797.9	219.377	-1.63113	0.156377	-10.4308	1.79439e-25	4.26768e-24
ENSG00000180448.9	4406.34	-1.32554	0.127127	-10.4269	1.86881e-25	4.43968e-24
ENSG00000136147.15	910.839	-1.12928	0.10833	-10.4244	1.91838e-25	4.55234e-24
ENSG00000008517.15	3346.26	-1.77005	0.169807	-10.4239	1.92887e-25	4.57212e-24
ENSG00000109084.12	2510.2	1.11819	0.107282	10.4229	1.9496e-25	4.61608e-24
ENSG00000107562.15	5172.17	-1.66169	0.159513	-10.4173	2.06798e-25	4.89092e-24
ENSG00000159189.10	18513.9	-1.87111	0.179638	-10.416	2.09547e-25	4.95041e-24
ENSG00000126602.9	4496.84	0.817579	0.0784972	10.4154	2.10911e-25	4.97707e-24
ENSG00000125772.11	1219.76	-1.10966	0.106719	-10.398	2.53224e-25	5.96893e-24
ENSG00000236199.1	44.9128	-1.13103	0.108778	-10.3975	2.54448e-25	5.99113e-24
ENSG00000213949.7	1771.85	-1.50945	0.145189	-10.3964	2.57418e-25	6.05433e-24
ENSG00000168995.12	194.586	-1.88089	0.180982	-10.3927	2.67689e-25	6.28891e-24
ENSG00000084207.14	63813.9	1.87379	0.180321	10.3914	2.71243e-25	6.36534e-24
ENSG00000211734.3	82.587	-2.4894	0.239623	-10.3888	2.78765e-25	6.53463e-24
ENSG00000043591.5	10.7153	-2.36949	0.228093	-10.3883	2.8036e-25	6.56477e-24
ENSG00000124466.8	1182.16	2.91586	0.280757	10.3857	2.88019e-25	6.73666e-24
ENSG00000173567.13	23.3159	-1.33261	0.128366	-10.3814	3.01441e-25	7.04283e-24
ENSG00000211800.3	16.2547	-2.48046	0.238981	-10.3793	3.08019e-25	7.18859e-24
ENSG00000197272.2	23.2324	-2.0569	0.198316	-10.3718	3.33067e-25	7.76461e-24
ENSG00000002549.11	8569.76	-1.11373	0.107381	-10.3717	3.33628e-25	7.76913e-24
ENSG00000167261.12	257.376	-1.77033	0.170798	-10.3651	3.57459e-25	8.31495e-24
ENSG00000225698.3	409.062	-3.77922	0.364722	-10.3619	3.69405e-25	8.58339e-24
ENSG00000152804.9	521.322	-1.47108	0.141982	-10.3611	3.72838e-25	8.65367e-24
ENSG00000115902.9	13676.2	1.78587	0.172371	10.3606	3.7468e-25	8.68692e-24
ENSG00000196126.9	40577.3	-1.81397	0.175147	-10.3569	3.89509e-25	9.02086e-24
ENSG00000114841.16	464.697	-1.33596	0.129076	-10.3502	4.17572e-25	9.66023e-24
ENSG00000106263.16	19617.9	0.762105	0.0736328	10.3501	4.18176e-25	9.66364e-24
ENSG00000223534.1	62.7155	-2.14022	0.206796	-10.3494	4.21089e-25	9.72037e-24
ENSG00000204872.3	8.60848	-1.70079	0.164362	-10.3478	4.28145e-25	9.87249e-24
ENSG00000165802.18	4678.69	1.29987	0.125697	10.3413	4.58387e-25	1.05584e-23
ENSG00000150630.3	351.361	-1.45058	0.140285	-10.3402	4.6337e-25	1.06615e-23
ENSG00000254503.1	16.1398	-1.48209	0.143363	-10.338	4.74093e-25	1.08964e-23
ENSG00000276070.3	440.185	-2.08382	0.201708	-10.3309	5.10775e-25	1.17268e-23
ENSG00000168811.5	19.8277	-1.92212	0.186092	-10.3289	5.21788e-25	1.19667e-23
ENSG00000169313.9	79.545	-2.42951	0.235391	-10.3212	5.65363e-25	1.2952e-23
ENSG00000211779.3	20.3314	-2.50372	0.242633	-10.319	5.78491e-25	1.32385e-23
ENSG00000139626.14	537.491	-1.69384	0.164338	-10.307	6.54999e-25	1.49731e-23
ENSG00000111860.12	504.392	-1.32394	0.128491	-10.3038	6.77343e-25	1.54672e-23
ENSG00000138670.15	442.25	-1.37998	0.133966	-10.301	6.97427e-25	1.58944e-23
ENSG00000225756.1	127.052	-1.97657	0.191882	-10.301	6.9755e-25	1.58944e-23
ENSG00000116521.9	10141	1.01641	0.0987091	10.2971	7.26507e-25	1.65364e-23
ENSG00000163930.8	8028.45	0.744913	0.0723454	10.2966	7.29759e-25	1.65926e-23
ENSG00000205683.10	96.9108	-1.6683	0.162038	-10.2957	7.36564e-25	1.67294e-23
ENSG00000211780.3	12.1619	-2.50309	0.243143	-10.2948	7.44099e-25	1.68824e-23
ENSG00000188042.7	2856.75	-1.21647	0.118206	-10.2911	7.73013e-25	1.75197e-23
ENSG00000143801.15	6003.95	1.25628	0.122212	10.2795	8.71389e-25	1.97282e-23
ENSG00000127074.13	54.6012	-3.35451	0.326357	-10.2787	8.7949e-25	1.98904e-23
ENSG00000164430.14	372.513	-1.36884	0.133211	-10.2757	9.06489e-25	2.04791e-23
ENSG00000089692.7	2218.09	-2.45183	0.238681	-10.2724	9.38413e-25	2.11652e-23
ENSG00000108344.13	9173.13	0.703085	0.0684443	10.2724	9.38857e-25	2.11652e-23
ENSG00000106628.9	9616.65	0.985425	0.0959407	10.2712	9.50279e-25	2.14e-23
ENSG00000265148.4	103.791	-1.66987	0.162642	-10.2672	9.90691e-25	2.22863e-23
ENSG00000124191.16	526.453	-1.87337	0.182496	-10.2652	1.0106e-24	2.27101e-23
ENSG00000006459.9	985.583	-1.13843	0.110988	-10.2573	1.09734e-24	2.46333e-23
ENSG00000143569.17	14574.1	0.740867	0.0722658	10.252	1.15947e-24	2.60003e-23
ENSG00000123374.9	23441.5	1.53851	0.150071	10.2519	1.16086e-24	2.6004e-23
ENSG00000233038.4	165.088	-1.87538	0.182943	-10.2511	1.16974e-24	2.61753e-23
ENSG00000211803.2	14.5008	-2.39788	0.233926	-10.2506	1.17619e-24	2.62919e-23
ENSG00000269800.1	9.0184	-1.69296	0.165161	-10.2504	1.17871e-24	2.63204e-23
ENSG00000099250.16	2354.75	-1.41016	0.137629	-10.2461	1.2327e-24	2.74971e-23
ENSG00000167889.11	2777.31	2.25101	0.219715	10.2451	1.24437e-24	2.77282e-23
ENSG00000005302.16	1341.29	-0.781675	0.0763144	-10.2428	1.27466e-24	2.83722e-23
ENSG00000211802.3	18.0492	-2.56053	0.249985	-10.2427	1.27595e-24	2.83722e-23
ENSG00000110777.10	1562.86	-2.60303	0.254362	-10.2336	1.40232e-24	3.11495e-23
ENSG00000276136.1	30.2213	-1.65252	0.161501	-10.2323	1.42152e-24	3.15429e-23
ENSG00000142875.18	2777.5	-1.25645	0.122797	-10.2319	1.42669e-24	3.16245e-23
ENSG00000128512.18	888.726	-1.40577	0.137403	-10.231	1.44034e-24	3.18937e-23
ENSG00000118508.4	4967.53	1.15392	0.112798	10.23	1.45492e-24	3.21828e-23
ENSG00000161091.11	39882.3	1.54623	0.151168	10.2285	1.47756e-24	3.26496e-23
ENSG00000175309.13	1153.71	-0.858307	0.0839309	-10.2263	1.51113e-24	3.33566e-23
ENSG00000272155.1	19.1589	-1.55549	0.152264	-10.2158	1.68545e-24	3.71658e-23
ENSG00000169403.10	1301.06	-1.58399	0.155111	-10.212	1.75298e-24	3.86148e-23
ENSG00000124557.11	14.3585	-2.17881	0.213366	-10.2116	1.75947e-24	3.87175e-23
ENSG00000100304.12	6011.21	1.22602	0.120069	10.211	1.77073e-24	3.89248e-23
ENSG00000271009.2	16.4201	-1.8392	0.180139	-10.2099	1.79097e-24	3.93289e-23
ENSG00000166707.9	47.6905	-1.60914	0.157662	-10.2063	1.85837e-24	4.07669e-23
ENSG00000106305.8	1558.8	0.816069	0.079996	10.2014	1.95502e-24	4.28426e-23
ENSG00000139190.15	541.111	-1.39398	0.136702	-10.1972	2.03991e-24	4.4632e-23
ENSG00000197442.9	799.006	-1.33509	0.130927	-10.1972	2.04089e-24	4.4632e-23
ENSG00000111052.6	74.7189	-1.65655	0.162554	-10.1908	2.18046e-24	4.76351e-23
ENSG00000154175.15	977.44	-2.17441	0.213388	-10.19	2.19862e-24	4.79824e-23
ENSG00000165929.11	497.412	-1.85997	0.18255	-10.1888	2.22442e-24	4.84955e-23
ENSG00000182240.14	26099.9	1.14044	0.112139	10.1699	2.70243e-24	5.88564e-23
ENSG00000043462.10	3191.91	-1.51278	0.14879	-10.1672	2.77828e-24	6.04461e-23
ENSG00000205413.6	1544.57	-1.4507	0.142695	-10.1664	2.80059e-24	6.0869e-23
ENSG00000108798.7	1113.73	-1.54479	0.151984	-10.1641	2.86684e-24	6.22451e-23
ENSG00000237111.1	23.6677	-3.10917	0.306386	-10.1479	3.38695e-24	7.34626e-23
ENSG00000140795.11	152.827	2.7257	0.268673	10.145	3.48606e-24	7.55349e-23
ENSG00000273669.1	32.1832	-1.5158	0.149482	-10.1404	3.65784e-24	7.91761e-23
ENSG00000196422.9	1986.5	0.893332	0.0881169	10.138	3.74604e-24	8.10024e-23
ENSG00000122986.12	759.139	-1.54905	0.152828	-10.1359	3.82813e-24	8.26931e-23
ENSG00000211807.3	21.5576	-2.41184	0.238091	-10.1299	4.06927e-24	8.78126e-23
ENSG00000226025.8	74.0113	-2.9919	0.295578	-10.1222	4.40384e-24	9.49356e-23
ENSG00000259436.1	34.8577	-2.03762	0.201318	-10.1214	4.43955e-24	9.56081e-23
ENSG00000272501.1	98.3556	-1.35076	0.133476	-10.1198	4.51297e-24	9.70907e-23
ENSG00000100060.16	972.676	-1.5872	0.156877	-10.1175	4.62109e-24	9.93158e-23
ENSG00000229153.4	8.25068	-1.90177	0.187973	-10.1172	4.63273e-24	9.94651e-23
ENSG00000170989.8	815.914	-1.47068	0.145391	-10.1153	4.72428e-24	1.01328e-22
ENSG00000109670.12	875.454	-0.805188	0.0796123	-10.1139	4.7955e-24	1.02752e-22
ENSG00000183779.6	8893.14	1.59296	0.157687	10.1021	5.4085e-24	1.15769e-22
ENSG00000167094.14	59.0164	-1.88592	0.18686	-10.0927	5.95238e-24	1.27282e-22
ENSG00000115232.12	1152.46	-2.03738	0.201909	-10.0906	6.07898e-24	1.29859e-22
ENSG00000123685.7	160.385	-1.33289	0.132127	-10.0879	6.2462e-24	1.33296e-22
ENSG00000064961.17	13090.4	1.12515	0.111538	10.0876	6.26974e-24	1.33664e-22
ENSG00000159784.16	47.0334	-1.71862	0.170509	-10.0794	6.81745e-24	1.45195e-22
ENSG00000100298.14	107.542	-1.69819	0.168493	-10.0787	6.86265e-24	1.4601e-22
ENSG00000235568.5	1061.3	-1.70087	0.168792	-10.0767	7.00222e-24	1.4883e-22
ENSG00000256967.1	23.7673	-1.74137	0.172918	-10.0705	7.46054e-24	1.58413e-22
ENSG00000225864.1	21.2678	-2.1016	0.208716	-10.0692	7.56095e-24	1.60384e-22
ENSG00000111641.9	4183.32	0.736962	0.0731971	10.0682	7.63661e-24	1.61827e-22
ENSG00000112651.10	2689.23	0.980985	0.0974628	10.0652	7.87065e-24	1.6662e-22
ENSG00000127124.12	1705.05	-1.07125	0.106502	-10.0585	8.42642e-24	1.78208e-22
ENSG00000112782.14	164.343	-1.52299	0.15154	-10.05	9.18233e-24	1.94001e-22
ENSG00000188389.9	733.164	-2.28556	0.22757	-10.0433	9.82936e-24	2.07464e-22
ENSG00000159958.4	660.145	-2.31656	0.230712	-10.0409	1.00716e-23	2.12365e-22
ENSG00000213886.3	988.429	-2.41973	0.241068	-10.0375	1.04234e-23	2.19565e-22
ENSG00000137731.12	26.6439	-2.14672	0.213927	-10.0349	1.07108e-23	2.25394e-22
ENSG00000234511.7	31.5807	-2.25907	0.225182	-10.0322	1.10021e-23	2.31296e-22
ENSG00000048462.9	178.165	-2.7789	0.277018	-10.0315	1.10869e-23	2.32846e-22
ENSG00000143167.10	20.9485	-2.37571	0.236839	-10.0309	1.11467e-23	2.33872e-22
ENSG00000226777.6	306.967	-2.9759	0.296702	-10.0299	1.12613e-23	2.36042e-22
ENSG00000259134.4	25.4554	-2.01667	0.201091	-10.0286	1.14098e-23	2.38918e-22
ENSG00000260997.1	112.634	-1.83913	0.183442	-10.0257	1.17545e-23	2.45893e-22
ENSG00000023697.11	2955.62	0.847014	0.0845239	10.021	1.23252e-23	2.57576e-22
ENSG00000072694.17	671.384	-1.37062	0.136817	-10.0179	1.27141e-23	2.65443e-22
ENSG00000164512.16	35.0495	-2.05015	0.204662	-10.0172	1.28017e-23	2.67008e-22
ENSG00000261618.1	13.1675	-2.30596	0.230243	-10.0154	1.30472e-23	2.71862e-22
ENSG00000116748.18	27.5051	-2.73871	0.27352	-10.0128	1.33866e-23	2.7866e-22
ENSG00000010256.9	15552.1	0.969125	0.0968011	10.0115	1.35666e-23	2.8213e-22
ENSG00000112419.13	813.614	-1.34234	0.134089	-10.0108	1.36634e-23	2.83864e-22
ENSG00000236213.1	10.6595	-1.77208	0.177035	-10.0098	1.38031e-23	2.86486e-22
ENSG00000069424.13	21096	1.63514	0.16341	10.0064	1.42923e-23	2.96348e-22
ENSG00000120436.3	11.0525	-2.42935	0.242829	-10.0044	1.45806e-23	3.0203e-22
ENSG00000143772.8	23876.6	1.55835	0.155772	10.004	1.4631e-23	3.02778e-22
ENSG00000246223.7	47.6915	-2.0159	0.201519	-10.0035	1.471e-23	3.04117e-22
ENSG00000211716.2	58.9585	-2.43038	0.24298	-10.0024	1.48753e-23	3.07234e-22
ENSG00000173171.13	1393.32	0.987044	0.0986911	10.0014	1.50332e-23	3.10193e-22
ENSG00000165025.13	2075.5	-1.60632	0.160627	-10.0003	1.5192e-23	3.13165e-22
ENSG00000172322.12	147.582	-2.01378	0.201407	-9.99857	1.54611e-23	3.18402e-22
ENSG00000173762.6	1594.76	-2.08693	0.208739	-9.99778	1.55849e-23	3.2064e-22
ENSG00000261438.1	25.9568	-1.41185	0.141237	-9.9963	1.58203e-23	3.25168e-22
ENSG00000240219.1	28.176	-2.33126	0.233222	-9.99587	1.58889e-23	3.26261e-22
ENSG00000204257.13	7780.78	-1.54707	0.154784	-9.99501	1.60264e-23	3.28767e-22
ENSG00000143226.12	3472.04	-1.34095	0.134164	-9.99484	1.60551e-23	3.29036e-22
ENSG00000117009.10	265.742	-1.80426	0.180633	-9.98852	1.71121e-23	3.5036e-22
ENSG00000100347.13	8087.07	1.27457	0.127618	9.98743	1.73016e-23	3.53899e-22
ENSG00000085998.12	9626.44	0.825166	0.0826592	9.98275	1.81372e-23	3.70632e-22
ENSG00000050344.8	1695.59	-1.44514	0.144806	-9.97982	1.86807e-23	3.81371e-22
ENSG00000229950.1	621.593	1.78202	0.178575	9.97915	1.88079e-23	3.83598e-22
ENSG00000255833.1	135.243	-2.08684	0.209161	-9.9772	1.91795e-23	3.90801e-22
ENSG00000163687.12	275.171	-2.55282	0.255979	-9.97278	2.00538e-23	4.08223e-22
ENSG00000206053.11	5759.56	0.579418	0.0581192	9.96948	2.07302e-23	4.21586e-22
ENSG00000107201.8	949.126	-1.37958	0.138496	-9.96113	2.25474e-23	4.58104e-22
ENSG00000119397.15	1212.65	-1.16845	0.117362	-9.95602	2.37385e-23	4.81842e-22
ENSG00000067066.15	3614.62	-0.869228	0.0873281	-9.95359	2.43252e-23	4.93277e-22
ENSG00000100099.19	8663.11	1.00231	0.100713	9.95213	2.46849e-23	5.00093e-22
ENSG00000143494.14	64.8322	-1.69958	0.17079	-9.95127	2.48993e-23	5.03955e-22
ENSG00000100075.8	7551	1.28487	0.129142	9.94929	2.53994e-23	5.13587e-22
ENSG00000164946.18	353.32	-2.81858	0.283332	-9.94798	2.57357e-23	5.19891e-22
ENSG00000211752.3	19.0867	-2.36482	0.237735	-9.94728	2.59179e-23	5.23073e-22
ENSG00000178149.15	1749.61	0.839905	0.0844374	9.94707	2.59708e-23	5.23642e-22
ENSG00000182487.11	196.512	-2.02306	0.203398	-9.94632	2.61687e-23	5.2713e-22
ENSG00000228594.3	3284.67	2.03139	0.204262	9.94502	2.65116e-23	5.3353e-22
ENSG00000165688.10	4546.48	0.86399	0.0869036	9.94194	2.73452e-23	5.49783e-22
ENSG00000138685.11	430.271	-2.1871	0.220139	-9.93511	2.92846e-23	5.88218e-22
ENSG00000105492.14	16.5781	-2.4634	0.248189	-9.92551	3.22445e-23	6.47058e-22
ENSG00000176390.11	913.726	-0.956963	0.0964434	-9.92254	3.32209e-23	6.6602e-22
ENSG00000139405.14	1917.59	0.821335	0.08283	9.91591	3.55004e-23	7.11049e-22
ENSG00000077943.7	156.408	-1.70936	0.17247	-9.91104	3.7275e-23	7.45888e-22
ENSG00000196405.11	4472.41	-1.27783	0.128952	-9.90933	3.79198e-23	7.58074e-22
ENSG00000162396.5	505.212	0.805263	0.0813733	9.89591	4.33666e-23	8.66147e-22
ENSG00000158714.9	2229.54	-1.66157	0.167914	-9.89537	4.36013e-23	8.70014e-22
ENSG00000226312.6	8.76772	-1.54174	0.155903	-9.88911	4.6413e-23	9.25248e-22
ENSG00000185245.7	364.21	-2.34836	0.237478	-9.88875	4.65809e-23	9.27722e-22
ENSG00000101017.12	1402.97	-1.44256	0.145904	-9.88702	4.73911e-23	9.42971e-22
ENSG00000170515.12	10467.3	0.601055	0.0608091	9.8843	4.86951e-23	9.6801e-22
ENSG00000260314.2	1176.36	-1.91537	0.193802	-9.88311	4.92801e-23	9.7872e-22
ENSG00000060656.18	3983.38	2.41958	0.24489	9.8803	5.06823e-23	1.00563e-21
ENSG00000112096.15	15265.6	-1.17113	0.118542	-9.87948	5.10992e-23	1.01295e-21
ENSG00000158050.4	910.158	-1.36914	0.138617	-9.87711	5.23208e-23	1.0362e-21
ENSG00000178343.4	78.1168	-3.35611	0.340013	-9.87052	5.58717e-23	1.10549e-21
ENSG00000239961.2	143.568	-2.44825	0.24819	-9.86444	5.93637e-23	1.17349e-21
ENSG00000101546.11	1233.76	0.643461	0.0652473	9.86188	6.09011e-23	1.20275e-21
ENSG00000168010.9	796.61	-1.20843	0.122566	-9.85941	6.24133e-23	1.23147e-21
ENSG00000177575.11	4406.85	-1.88554	0.191274	-9.85779	6.34287e-23	1.25034e-21
ENSG00000269404.5	487.541	-2.48467	0.252123	-9.85498	6.52282e-23	1.28462e-21
ENSG00000110436.10	45.899	-2.50032	0.253749	-9.85353	6.61747e-23	1.30205e-21
ENSG00000249096.5	60.0053	-2.23386	0.226731	-9.85244	6.69008e-23	1.31512e-21
ENSG00000277299.1	6.21113	-1.6452	0.16714	-9.84321	7.33327e-23	1.44022e-21
ENSG00000167085.10	10280	0.791607	0.0804518	9.83952	7.60746e-23	1.49268e-21
ENSG00000164116.15	322.195	-1.3588	0.138135	-9.83678	7.81745e-23	1.53107e-21
ENSG00000099917.16	17491.5	1.05252	0.106999	9.83678	7.81756e-23	1.53107e-21
ENSG00000138496.15	4333.84	-1.06925	0.10872	-9.83491	7.96398e-23	1.55831e-21
ENSG00000104432.11	100.212	-1.65353	0.168132	-9.83472	7.97857e-23	1.55972e-21
ENSG00000146701.10	19333.8	0.875427	0.0890442	9.83138	8.24802e-23	1.61091e-21
ENSG00000237940.3	29.8451	-2.12353	0.216168	-9.82352	8.91714e-23	1.73999e-21
ENSG00000103253.16	1600.41	1.32611	0.135013	9.82214	9.04082e-23	1.7625e-21
ENSG00000231389.6	31037.7	-1.75915	0.179154	-9.81921	9.30678e-23	1.81268e-21
ENSG00000107864.13	161.948	-1.04965	0.106922	-9.81701	9.51254e-23	1.85106e-21
ENSG00000213626.10	3624.18	-1.3661	0.139167	-9.81627	9.58213e-23	1.86289e-21
ENSG00000166928.9	82.3786	-1.56813	0.159759	-9.81558	9.64799e-23	1.87397e-21
ENSG00000144120.11	1082.06	0.981626	0.100144	9.80215	1.10215e-22	2.13879e-21
ENSG00000206561.11	168.008	-1.52392	0.155523	-9.7987	1.14045e-22	2.21109e-21
ENSG00000150977.10	1028.36	-0.872297	0.0890548	-9.79506	1.1823e-22	2.29015e-21
ENSG00000148948.6	27.0054	-2.01267	0.20554	-9.79212	1.21721e-22	2.3556e-21
ENSG00000060982.13	767.377	-1.65878	0.169485	-9.78719	1.27802e-22	2.47103e-21
ENSG00000163568.12	726.959	-2.16311	0.221032	-9.78639	1.28809e-22	2.48824e-21
ENSG00000173372.15	19540.4	-1.81863	0.185852	-9.78537	1.30118e-22	2.51122e-21
ENSG00000115415.17	29309.4	-1.33328	0.136286	-9.78294	1.33276e-22	2.56984e-21
ENSG00000143314.11	5799.88	0.938993	0.0960793	9.77311	1.46869e-22	2.82935e-21
ENSG00000122223.11	172.818	-1.76935	0.181044	-9.77302	1.47002e-22	2.82935e-21
ENSG00000092871.15	717.037	-0.811522	0.0830389	-9.77279	1.47333e-22	2.83316e-21
ENSG00000126264.8	610.429	-1.66427	0.170301	-9.77249	1.47773e-22	2.83904e-21
ENSG00000088827.11	2096.52	-1.695	0.173536	-9.76739	1.55398e-22	2.98282e-21
ENSG00000104044.14	5253.8	3.14866	0.322483	9.76381	1.60994e-22	3.08744e-21
ENSG00000101974.13	900.474	-1.06912	0.109513	-9.76246	1.63144e-22	3.12584e-21
ENSG00000243811.6	491.609	-1.39234	0.142648	-9.76064	1.66104e-22	3.17969e-21
ENSG00000233806.6	15.2981	-1.70132	0.17434	-9.75865	1.694e-22	3.23985e-21
ENSG00000158517.12	571.233	-1.90729	0.19552	-9.75499	1.75624e-22	3.35586e-21
ENSG00000019582.13	233653	-1.71919	0.176242	-9.75469	1.76136e-22	3.36261e-21
ENSG00000134490.12	531.653	0.686272	0.0704262	9.74456	1.94619e-22	3.71213e-21
ENSG00000163053.9	74.0428	-1.25477	0.128773	-9.74398	1.95726e-22	3.72988e-21
ENSG00000175866.14	5473.44	1.17946	0.121123	9.73772	2.08178e-22	3.96361e-21
ENSG00000148308.16	3843.44	0.893415	0.0917629	9.73613	2.11457e-22	4.02243e-21
ENSG00000182326.13	14202	-1.52287	0.156458	-9.73342	2.1716e-22	4.12721e-21
ENSG00000264456.1	49.0905	-0.941225	0.0967038	-9.73307	2.17908e-22	4.13771e-21
ENSG00000141506.12	902.585	-1.49946	0.154116	-9.72937	2.25997e-22	4.28747e-21
ENSG00000151892.13	418.952	-2.60539	0.26788	-9.72598	2.33648e-22	4.42865e-21
ENSG00000204577.10	201.346	-1.4791	0.152117	-9.72344	2.39558e-22	4.53661e-21
ENSG00000230795.2	62.5774	-1.29038	0.13272	-9.72256	2.41627e-22	4.57172e-21
ENSG00000126353.3	968.007	-2.21821	0.228183	-9.72116	2.44964e-22	4.63072e-21
ENSG00000123892.10	6456.46	1.53532	0.157998	9.7173	2.54437e-22	4.8054e-21
ENSG00000185813.9	4360.1	1.12911	0.116197	9.71721	2.54658e-22	4.8054e-21
ENSG00000002933.6	2310.57	-1.56267	0.160834	-9.71601	2.57672e-22	4.85793e-21
ENSG00000076201.13	8649.7	0.955728	0.0983847	9.71419	2.62331e-22	4.94138e-21
ENSG00000101158.11	6909.69	0.619251	0.0637822	9.70885	2.76451e-22	5.20273e-21
ENSG00000272839.1	12.8937	-1.94989	0.20085	-9.70816	2.78307e-22	5.233e-21
ENSG00000101400.5	2779.79	1.45685	0.150104	9.70561	2.85364e-22	5.36095e-21
ENSG00000131462.6	4130.58	0.881471	0.0908706	9.70029	3.00646e-22	5.64304e-21
ENSG00000198715.10	14350.2	1.36852	0.141143	9.69597	3.13647e-22	5.88185e-21
ENSG00000243649.7	155.637	-1.50395	0.155118	-9.69548	3.15161e-22	5.90501e-21
ENSG00000100523.13	847.383	-0.949059	0.0978915	-9.695	3.16629e-22	5.92727e-21
ENSG00000084070.10	4630.64	-0.836855	0.0863315	-9.69351	3.21287e-22	6.00594e-21
ENSG00000145681.9	67.7203	-3.46679	0.357642	-9.69348	3.21397e-22	6.00594e-21
ENSG00000105352.9	26.7497	-1.5823	0.163405	-9.68329	3.55096e-22	6.62981e-21
ENSG00000182557.6	61.6603	-1.87468	0.193658	-9.68035	3.65476e-22	6.8176e-21
ENSG00000158525.14	21.085	-2.64611	0.273397	-9.67863	3.71658e-22	6.92683e-21
ENSG00000211790.2	26.2804	-2.15061	0.222338	-9.67269	3.93885e-22	7.33463e-21
ENSG00000122133.15	27320.9	4.20016	0.434535	9.66587	4.21016e-22	7.83297e-21
ENSG00000131467.9	9179.6	0.617303	0.0638933	9.66147	4.39531e-22	8.17027e-21
ENSG00000100351.15	478.613	-1.63484	0.169242	-9.65979	4.46778e-22	8.29769e-21
ENSG00000114867.18	31397.2	0.765648	0.0792626	9.65963	4.47478e-22	8.30342e-21
ENSG00000147647.11	16.6436	-1.9756	0.204553	-9.65817	4.53907e-22	8.41535e-21
ENSG00000115207.12	3963.16	0.585355	0.0606109	9.65759	4.56482e-22	8.45569e-21
ENSG00000244731.6	274.616	-1.97415	0.204465	-9.65519	4.67279e-22	8.64813e-21
ENSG00000181991.14	1866.94	0.729028	0.0755082	9.65495	4.68387e-22	8.66108e-21
ENSG00000115325.12	860.863	-0.886639	0.0918567	-9.65242	4.80105e-22	8.87002e-21
ENSG00000227403.1	18.8759	-2.0614	0.213582	-9.65157	4.84067e-22	8.93542e-21
ENSG00000100906.9	4047.79	-0.936471	0.0970576	-9.6486	4.98301e-22	9.19015e-21
ENSG00000119686.8	368.904	-1.14368	0.118566	-9.64593	5.11458e-22	9.42462e-21
ENSG00000141540.9	7026	1.38194	0.14332	9.64234	5.29665e-22	9.75164e-21
ENSG00000198502.5	13384.5	-1.87208	0.194154	-9.64224	5.30195e-22	9.75291e-21
ENSG00000198178.9	14.2053	-2.56091	0.26562	-9.64127	5.35221e-22	9.83683e-21
ENSG00000104812.13	6578.07	1.11798	0.115983	9.63915	5.46392e-22	1.00334e-20
ENSG00000255248.5	524.407	-2.0503	0.212711	-9.63888	5.47836e-22	1.00512e-20
ENSG00000154822.14	442.343	-1.43405	0.148811	-9.63673	5.59399e-22	1.02545e-20
ENSG00000205809.8	19.8461	-2.62571	0.272517	-9.63503	5.68781e-22	1.04175e-20
ENSG00000116701.13	1196.41	-1.50025	0.155712	-9.63479	5.70103e-22	1.04327e-20
ENSG00000270194.1	431.053	1.1431	0.118646	9.6346	5.71168e-22	1.04432e-20
ENSG00000117411.15	4071.22	0.937962	0.0974188	9.62814	6.08184e-22	1.11104e-20
ENSG00000136045.10	3624.72	0.556194	0.0577809	9.62592	6.21469e-22	1.13433e-20
ENSG00000169750.7	1286.88	1.5918	0.165451	9.62096	6.52213e-22	1.18942e-20
ENSG00000165178.9	324.491	-1.89465	0.196964	-9.61931	6.62774e-22	1.20764e-20
ENSG00000182179.9	3374.4	-1.38342	0.143831	-9.61833	6.69118e-22	1.21815e-20
ENSG00000027001.8	1520.54	0.798603	0.0830512	9.61579	6.85826e-22	1.2475e-20
ENSG00000104415.12	309.559	-1.40755	0.146419	-9.6132	7.03296e-22	1.278e-20
ENSG00000078246.14	2450.31	0.964981	0.100382	9.61312	7.038e-22	1.278e-20
ENSG00000237254.2	28.151	-2.51661	0.261917	-9.60844	7.36556e-22	1.33633e-20
ENSG00000136560.12	1293.64	-0.942871	0.0981426	-9.60715	7.45838e-22	1.35201e-20
ENSG00000101444.11	15401.1	0.923656	0.0961543	9.60597	7.5441e-22	1.36638e-20
ENSG00000137841.10	1814.15	-1.42306	0.148183	-9.60341	7.73434e-22	1.39964e-20
ENSG00000211812.1	11.7241	-2.36926	0.246736	-9.6024	7.81024e-22	1.41217e-20
ENSG00000204568.10	5764.34	0.676171	0.0704206	9.60189	7.84886e-22	1.41795e-20
ENSG00000213145.8	140.489	-1.55376	0.161856	-9.59967	8.02036e-22	1.4477e-20
ENSG00000261754.2	12.4282	-1.75119	0.182426	-9.59945	8.03742e-22	1.44954e-20
ENSG00000184056.13	1988.13	0.750167	0.0781608	9.59774	8.17157e-22	1.47248e-20
ENSG00000136573.11	385.327	-2.75224	0.286778	-9.59711	8.2218e-22	1.48027e-20
ENSG00000232934.6	11.9977	-1.66345	0.173385	-9.59397	8.47554e-22	1.52466e-20
ENSG00000254887.1	12.3706	-1.94819	0.203111	-9.59176	8.65992e-22	1.55651e-20
ENSG00000101464.9	2110.25	0.720329	0.0751006	9.59152	8.67957e-22	1.55872e-20
ENSG00000146278.10	3541.08	-0.70805	0.0738242	-9.59102	8.72149e-22	1.56492e-20
ENSG00000230099.2	32.6913	-2.22431	0.231955	-9.58938	8.86156e-22	1.58871e-20
ENSG00000111644.6	112.444	-1.38675	0.144642	-9.58749	9.02555e-22	1.61674e-20
ENSG00000143368.9	8356.22	0.912632	0.0952113	9.58533	9.21652e-22	1.64955e-20
ENSG00000234261.2	11.0957	-1.75542	0.183192	-9.58239	9.48203e-22	1.69564e-20
ENSG00000186105.7	10.5393	-1.61822	0.168881	-9.58201	9.51726e-22	1.70051e-20
ENSG00000206337.9	2481.02	-1.7914	0.18699	-9.58018	9.68731e-22	1.72943e-20
ENSG00000276405.1	21.7608	-2.43383	0.254071	-9.57933	9.76783e-22	1.74234e-20
ENSG00000172716.15	1166.75	-1.55347	0.162199	-9.57754	9.93842e-22	1.77128e-20
ENSG00000213585.9	17068.8	0.727861	0.0760352	9.57268	1.04167e-21	1.85496e-20
ENSG00000121281.11	614.438	-1.33131	0.139092	-9.57146	1.05411e-21	1.87553e-20
ENSG00000108861.7	9153.23	0.827594	0.0864851	9.5692	1.07732e-21	1.91523e-20
ENSG00000164509.12	23.9733	-2.33554	0.244149	-9.56604	1.11074e-21	1.97298e-20
ENSG00000224614.1	12.072	-1.41904	0.148364	-9.56459	1.12652e-21	1.99934e-20
ENSG00000271605.4	319.059	-1.42715	0.149461	-9.54863	1.31426e-21	2.33058e-20
ENSG00000211645.2	20.3059	-2.64866	0.277442	-9.5467	1.33891e-21	2.3723e-20
ENSG00000175792.10	3665.22	0.66066	0.0692043	9.54653	1.34117e-21	2.37432e-20
ENSG00000211793.2	30.2531	-2.28348	0.239203	-9.5462	1.34541e-21	2.37985e-20
ENSG00000119401.10	1586.63	0.873198	0.091483	9.54492	1.36207e-21	2.4073e-20
ENSG00000141337.11	1235.87	1.09639	0.114895	9.54248	1.39459e-21	2.46274e-20
ENSG00000112936.17	2414.99	-2.98411	0.312732	-9.54207	1.40009e-21	2.47039e-20
ENSG00000040933.14	1853.67	-0.558447	0.0585375	-9.53998	1.42862e-21	2.51779e-20
ENSG00000223551.1	33.4338	-1.56515	0.164063	-9.53993	1.42933e-21	2.51779e-20
ENSG00000185947.13	713.321	-1.09671	0.114967	-9.53934	1.43743e-21	2.52994e-20
ENSG00000131368.6	3988.14	0.800548	0.0839303	9.53825	1.45269e-21	2.55468e-20
ENSG00000103415.10	4442.01	0.800178	0.0838935	9.53801	1.45594e-21	2.55828e-20
ENSG00000118407.13	107.227	-1.36752	0.143391	-9.53702	1.46995e-21	2.58076e-20
ENSG00000277030.1	36.4079	-3.22953	0.338655	-9.53636	1.47932e-21	2.59505e-20
ENSG00000141497.12	199.902	-1.46128	0.153236	-9.53611	1.4829e-21	2.59919e-20
ENSG00000254343.2	59.6672	-1.57122	0.16483	-9.53239	1.5371e-21	2.69195e-20
ENSG00000232759.1	13.154	-2.20395	0.231465	-9.52174	1.70302e-21	2.98007e-20
ENSG00000171631.13	375.894	-1.37969	0.144996	-9.51537	1.81071e-21	3.1659e-20
ENSG00000253364.1	26.9428	-3.09455	0.325234	-9.51484	1.81996e-21	3.17784e-20
ENSG00000085563.13	298.716	-1.72822	0.181634	-9.51481	1.82053e-21	3.17784e-20
ENSG00000110921.10	1427.94	0.985715	0.103732	9.5025	2.0491e-21	3.57387e-20
ENSG00000163159.10	3324.17	0.799926	0.084187	9.50178	2.06341e-21	3.59587e-20
ENSG00000122694.14	1371.73	-1.13875	0.11991	-9.49676	2.16527e-21	3.77027e-20
ENSG00000187653.11	86.1821	-1.63993	0.172698	-9.49591	2.18306e-21	3.79812e-20
ENSG00000176658.15	20169.2	1.34853	0.142091	9.49063	2.29647e-21	3.99217e-20
ENSG00000145708.9	21.0169	-1.70579	0.179792	-9.48758	2.36452e-21	4.10709e-20
ENSG00000186810.7	858.293	-2.00223	0.211193	-9.48057	2.52899e-21	4.38677e-20
ENSG00000273096.1	7.49703	-1.60519	0.169314	-9.48054	2.52967e-21	4.38677e-20
ENSG00000166866.11	13.6886	-1.63337	0.17231	-9.47929	2.56021e-21	4.43609e-20
ENSG00000111339.9	59.5445	-2.85721	0.301437	-9.47864	2.57617e-21	4.4601e-20
ENSG00000136463.7	1750.46	0.713039	0.0752791	9.47193	2.7472e-21	4.75009e-20
ENSG00000240350.2	15.1708	-1.56095	0.164798	-9.47189	2.74815e-21	4.75009e-20
ENSG00000108691.8	2041.6	-1.5858	0.167427	-9.47162	2.75544e-21	4.75881e-20
ENSG00000186376.13	477.401	-0.9907	0.104618	-9.46969	2.80679e-21	4.84354e-20
ENSG00000280003.1	10.654	-2.09678	0.221422	-9.46959	2.80936e-21	4.84404e-20
ENSG00000132965.8	739.806	-1.55146	0.16395	-9.46296	2.99358e-21	5.15748e-20
ENSG00000156500.13	135.988	-0.719375	0.0760283	-9.46195	3.02267e-21	5.20336e-20
ENSG00000138767.11	1912.8	-0.882337	0.093292	-9.4578	3.1448e-21	5.40921e-20
ENSG00000175182.12	1306.43	0.845011	0.0894134	9.45061	3.36869e-21	5.78961e-20
ENSG00000152229.17	485.528	-1.437	0.152083	-9.44882	3.42685e-21	5.88479e-20
ENSG00000160345.11	163.856	1.56662	0.16591	9.4426	3.63659e-21	6.23991e-20
ENSG00000138134.10	568.089	-1.14329	0.121082	-9.44225	3.64868e-21	6.25559e-20
ENSG00000232713.2	13.453	-1.26952	0.134508	-9.43825	3.79071e-21	6.49385e-20
ENSG00000153789.11	20.6604	-2.6	0.275554	-9.43554	3.88973e-21	6.6581e-20
ENSG00000272341.1	67.6417	-1.42864	0.151429	-9.43436	3.93404e-21	6.72414e-20
ENSG00000132768.12	2265.15	0.663426	0.0703208	9.43429	3.93665e-21	6.72414e-20
ENSG00000101220.16	4294.05	1.0419	0.110438	9.43425	3.93783e-21	6.72414e-20
ENSG00000137767.12	1450.18	-1.1826	0.125437	-9.42778	4.18875e-21	7.14684e-20
ENSG00000205221.11	88.0768	-2.81593	0.298724	-9.42655	4.2379e-21	7.22488e-20
ENSG00000123009.4	46.6975	1.22031	0.129476	9.42506	4.29878e-21	7.32279e-20
ENSG00000073060.14	20346.8	1.55131	0.164616	9.42378	4.35115e-21	7.40604e-20
ENSG00000167986.12	22042.5	0.79143	0.0839853	9.42343	4.36585e-21	7.4251e-20
ENSG00000088320.3	111.648	-1.86668	0.198115	-9.42223	4.41602e-21	7.50441e-20
ENSG00000179151.10	2617.85	0.658539	0.0698963	9.42166	4.44015e-21	7.53937e-20
ENSG00000042445.12	9321.94	1.11365	0.118221	9.42011	4.50634e-21	7.64562e-20
ENSG00000211697.3	42.2862	-2.04849	0.21752	-9.41746	4.62145e-21	7.83466e-20
ENSG00000270170.1	1196.13	0.786212	0.0834977	9.41597	4.6872e-21	7.93976e-20
ENSG00000261371.4	6730.69	-1.19807	0.127273	-9.41342	4.80258e-21	8.12871e-20
ENSG00000165714.9	845.481	0.674135	0.0716182	9.41289	4.8266e-21	8.16285e-20
ENSG00000167363.12	3271.7	1.43405	0.152427	9.40813	5.05041e-21	8.53456e-20
ENSG00000173369.14	22247.3	-1.8313	0.194656	-9.4079	5.06168e-21	8.54678e-20
ENSG00000146477.5	198.49	-2.40507	0.255667	-9.40704	5.1032e-21	8.61002e-20
ENSG00000004478.7	9713.27	0.972366	0.103377	9.40602	5.15303e-21	8.68718e-20
ENSG00000136943.9	337.079	1.60919	0.171119	9.40393	5.25601e-21	8.85374e-20
ENSG00000144485.9	3300.34	1.74273	0.185332	9.40329	5.28855e-21	8.90148e-20
ENSG00000140553.15	8664.2	0.856398	0.0910774	9.40297	5.3043e-21	8.9209e-20
ENSG00000114127.9	1909.54	-1.10414	0.117481	-9.39839	5.5403e-21	9.31043e-20
ENSG00000147606.7	46.2902	-2.47111	0.26301	-9.3955	5.69442e-21	9.56185e-20
ENSG00000182022.16	1123.12	-1.29972	0.138338	-9.3953	5.70533e-21	9.57257e-20
ENSG00000176095.10	5514.04	0.748625	0.0797125	9.39156	5.91172e-21	9.91102e-20
ENSG00000112514.14	12294.7	0.947672	0.100908	9.39143	5.91906e-21	9.91547e-20
ENSG00000166265.10	319.229	-1.23223	0.131219	-9.39062	5.96464e-21	9.98394e-20
ENSG00000103472.8	61.5067	-1.41927	0.151141	-9.39038	5.97866e-21	9.99951e-20
ENSG00000085733.14	17202.6	1.02995	0.109706	9.38833	6.09614e-21	1.0188e-19
ENSG00000047346.11	921.051	-1.05541	0.112419	-9.38815	6.10636e-21	1.0197e-19
ENSG00000181617.5	2458.94	-2.98579	0.318115	-9.3859	6.23838e-21	1.04093e-19
ENSG00000172403.9	877.242	-1.73575	0.184943	-9.3853	6.27364e-21	1.04598e-19
ENSG00000224041.3	169.426	-3.41707	0.364108	-9.38476	6.30613e-21	1.05058e-19
ENSG00000138744.13	902.124	-1.07375	0.1145	-9.3777	6.74288e-21	1.12245e-19
ENSG00000185669.5	117.83	-1.28909	0.137581	-9.36967	7.27631e-21	1.2103e-19
ENSG00000187323.10	25.3867	-2.71338	0.289631	-9.3684	7.36395e-21	1.22392e-19
ENSG00000156886.11	126.987	-1.98632	0.212028	-9.36819	7.37849e-21	1.22537e-19
ENSG00000185338.4	363.233	-1.47792	0.157801	-9.36575	7.55134e-21	1.2531e-19
ENSG00000156475.17	174.404	-1.8402	0.19651	-9.3644	7.64848e-21	1.26822e-19
ENSG00000169962.4	93.1552	-1.71712	0.183555	-9.35478	8.37727e-21	1.38798e-19
ENSG00000168081.7	109.937	-2.44902	0.261862	-9.3523	8.57591e-21	1.41978e-19
ENSG00000129450.7	275.158	-1.44423	0.154456	-9.35045	8.7278e-21	1.4438e-19
ENSG00000246575.2	31.252	-1.36708	0.146209	-9.35013	8.75418e-21	1.44704e-19
ENSG00000211721.2	55.9251	-2.25926	0.241655	-9.3491	8.8395e-21	1.46e-19
ENSG00000143373.16	3507.65	0.971326	0.103914	9.34741	8.98199e-21	1.48238e-19
ENSG00000166965.11	1052.28	0.742847	0.0794751	9.34691	9.02447e-21	1.48823e-19
ENSG00000211964.3	776.37	-3.16744	0.338948	-9.34492	9.19604e-21	1.51534e-19
ENSG00000100721.9	590.564	-3.14664	0.336741	-9.34438	9.24331e-21	1.52195e-19
ENSG00000068724.14	1648.18	-0.939206	0.100516	-9.34382	9.29226e-21	1.52882e-19
ENSG00000185668.6	896.256	2.01165	0.215328	9.34226	9.42974e-21	1.55024e-19
ENSG00000118985.13	1570.67	-1.16734	0.124976	-9.34048	9.58986e-21	1.57534e-19
ENSG00000207561.1	142.662	1.31528	0.140819	9.34022	9.61372e-21	1.57804e-19
ENSG00000106511.5	178.673	-2.31734	0.248186	-9.33709	9.90189e-21	1.62408e-19
ENSG00000248124.6	160.224	-1.36252	0.145932	-9.3367	9.93853e-21	1.62883e-19
ENSG00000266709.1	28.7479	-1.6514	0.176911	-9.33465	1.01328e-20	1.65939e-19
ENSG00000163840.8	5061.82	-1.0057	0.107746	-9.33401	1.01941e-20	1.66814e-19
ENSG00000197558.10	33.4311	-1.81784	0.194765	-9.33354	1.02393e-20	1.67423e-19
ENSG00000090316.14	4551.28	0.59681	0.0639471	9.33287	1.03039e-20	1.6835e-19
ENSG00000137801.10	7825.66	-1.64755	0.176572	-9.33075	1.05129e-20	1.71632e-19
ENSG00000278535.3	1058.4	1.03293	0.110717	9.32944	1.06436e-20	1.73633e-19
ENSG00000106829.17	619.261	-1.46337	0.156956	-9.32339	1.12684e-20	1.83684e-19
ENSG00000140263.12	1448.36	1.02395	0.109834	9.32274	1.13378e-20	1.84673e-19
ENSG00000138061.10	921.023	-1.70824	0.183251	-9.32186	1.14319e-20	1.86063e-19
ENSG00000168439.15	13847.1	0.708566	0.0760466	9.31752	1.19089e-20	1.93678e-19
ENSG00000073536.16	1449.72	0.772853	0.082952	9.31687	1.19824e-20	1.94724e-19
ENSG00000141349.7	8418.97	1.10188	0.118353	9.31017	1.27626e-20	2.07243e-19
ENSG00000122687.16	2515.37	0.547546	0.0588184	9.30909	1.2893e-20	2.09201e-19
ENSG00000273341.1	21.6072	-1.54355	0.165855	-9.30665	1.31923e-20	2.13893e-19
ENSG00000254470.2	3395.26	1.13909	0.122401	9.30623	1.32449e-20	2.14581e-19
ENSG00000132478.8	2949.96	0.656004	0.0704988	9.30518	1.33769e-20	2.16496e-19
ENSG00000134352.18	6119.74	-1.12843	0.121271	-9.30507	1.33907e-20	2.16496e-19
ENSG00000144647.5	1656.01	0.906862	0.0974592	9.30504	1.33937e-20	2.16496e-19
ENSG00000250138.4	28.5962	-1.75861	0.189025	-9.30355	1.3583e-20	2.19388e-19
ENSG00000181656.6	9.79893	-1.8389	0.197697	-9.30159	1.38363e-20	2.23309e-19
ENSG00000128218.7	211.496	-2.55205	0.274415	-9.29994	1.40521e-20	2.26619e-19
ENSG00000064989.11	457.02	-1.42383	0.153104	-9.29977	1.4075e-20	2.26817e-19
ENSG00000268849.4	7.24831	-1.80215	0.193812	-9.29845	1.42503e-20	2.29467e-19
ENSG00000155961.4	105.777	-1.8045	0.194069	-9.2982	1.42838e-20	2.29831e-19
ENSG00000143374.13	3430.87	0.82947	0.0892096	9.29799	1.43127e-20	2.30121e-19
ENSG00000119333.10	4207.21	1.1686	0.125696	9.29708	1.44361e-20	2.3193e-19
ENSG00000260135.5	35.8719	-2.26817	0.244053	-9.29374	1.4896e-20	2.39138e-19
ENSG00000272666.1	31.9336	-1.70642	0.183757	-9.28628	1.5978e-20	2.56313e-19
ENSG00000011143.15	975.705	0.641928	0.069136	9.28501	1.61691e-20	2.59182e-19
ENSG00000111206.11	4441.12	1.11208	0.119809	9.28209	1.66184e-20	2.66183e-19
ENSG00000160767.19	4331.41	1.01189	0.10902	9.28176	1.66709e-20	2.66823e-19
ENSG00000277089.3	26.4139	-1.96492	0.211725	-9.28054	1.68615e-20	2.69669e-19
ENSG00000135905.17	3396.7	-1.14869	0.123785	-9.27973	1.69916e-20	2.71546e-19
ENSG00000255112.2	3732.65	0.837129	0.0902132	9.27946	1.70344e-20	2.72023e-19
ENSG00000128606.11	78.0932	-1.95164	0.210384	-9.27659	1.74997e-20	2.79244e-19
ENSG00000128262.7	21.9718	-1.52375	0.164264	-9.27618	1.75659e-20	2.80089e-19
ENSG00000184060.9	962.788	-1.31087	0.141341	-9.27452	1.78422e-20	2.84282e-19
ENSG00000125459.13	1091.5	0.85291	0.0919688	9.27391	1.79445e-20	2.85682e-19
ENSG00000144130.10	14.6123	-1.82505	0.196796	-9.27384	1.79571e-20	2.85682e-19
ENSG00000240505.7	124.311	-2.71281	0.292527	-9.27371	1.79777e-20	2.85795e-19
ENSG00000105197.9	9721.44	1.04378	0.112556	9.27343	1.80249e-20	2.86331e-19
ENSG00000068120.13	5325.84	0.643672	0.069415	9.27281	1.81297e-20	2.87781e-19
ENSG00000059122.15	4792.91	0.971226	0.10477	9.27008	1.86002e-20	2.95028e-19
ENSG00000243650.3	9.19871	-1.72316	0.185938	-9.26741	1.90724e-20	3.0229e-19
ENSG00000178033.5	186.262	-1.28351	0.138537	-9.26474	1.95551e-20	3.09711e-19
ENSG00000049768.13	485.964	-1.38303	0.149287	-9.26424	1.96469e-20	3.10932e-19
ENSG00000165973.16	960.071	-4.10286	0.442999	-9.26156	2.01466e-20	3.18602e-19
ENSG00000000938.11	937.464	-1.5225	0.164415	-9.26013	2.04179e-20	3.22651e-19
ENSG00000105677.10	9283.78	1.06762	0.115294	9.25997	2.04492e-20	3.22905e-19
ENSG00000137267.5	4622.35	1.13877	0.122991	9.25895	2.06446e-20	3.25748e-19
ENSG00000117408.9	4979.65	0.894122	0.096581	9.25775	2.08789e-20	3.292e-19
ENSG00000114767.6	2337.88	0.853842	0.0922338	9.25737	2.09525e-20	3.30114e-19
ENSG00000129003.14	2979.21	-1.02482	0.110719	-9.25608	2.12066e-20	3.3387e-19
ENSG00000154328.14	1956.43	0.714784	0.077281	9.24915	2.26284e-20	3.5599e-19
ENSG00000096060.13	3242.49	-1.36254	0.147398	-9.24396	2.37529e-20	3.73403e-19
ENSG00000127589.4	94.6223	0.913997	0.0989086	9.24083	2.446e-20	3.84234e-19
ENSG00000141385.8	5178.09	0.721913	0.0781373	9.23903	2.48745e-20	3.90457e-19
ENSG00000127564.15	2077.02	1.21244	0.131267	9.23649	2.54706e-20	3.99411e-19
ENSG00000185359.11	6799.88	0.751196	0.0813295	9.23644	2.54827e-20	3.99411e-19
ENSG00000136930.11	9245.99	0.756668	0.0819514	9.23313	2.62848e-20	4.11679e-19
ENSG00000165806.18	958.031	-0.874579	0.094733	-9.23204	2.65521e-20	4.15558e-19
ENSG00000221887.5	14.4767	-1.98473	0.215024	-9.23025	2.69995e-20	4.22248e-19
ENSG00000213694.3	589.86	-1.32536	0.143711	-9.22243	2.90434e-20	4.53877e-19
ENSG00000107959.14	6838.59	0.917225	0.099502	9.21816	3.02252e-20	4.71998e-19
ENSG00000072401.13	776.627	-0.760978	0.082595	-9.21336	3.16067e-20	4.93208e-19
ENSG00000279396.1	16.1381	-1.85416	0.201313	-9.2103	3.25217e-20	5.07113e-19
ENSG00000228784.6	28.8586	-2.1133	0.229482	-9.20902	3.29105e-20	5.12798e-19
ENSG00000168924.13	4351.81	0.677162	0.0735399	9.2081	3.31956e-20	5.1686e-19
ENSG00000155659.13	2107.28	-1.79738	0.195309	-9.20278	3.48818e-20	5.42717e-19
ENSG00000187474.4	1282.5	-1.57615	0.171275	-9.20241	3.50007e-20	5.44167e-19
ENSG00000166448.13	34.9706	-2.12194	0.230685	-9.19842	3.63238e-20	5.64323e-19
ENSG00000188677.13	9932.24	1.1102	0.120741	9.1949	3.75344e-20	5.82615e-19
ENSG00000174485.13	1128	-0.934414	0.101624	-9.19484	3.75561e-20	5.82615e-19
ENSG00000119900.7	1125.51	-1.11828	0.121649	-9.19264	3.83308e-20	5.94197e-19
ENSG00000177494.5	216.03	-2.00766	0.218414	-9.19198	3.85687e-20	5.97448e-19
ENSG00000179344.15	13194.4	-1.69102	0.183987	-9.19094	3.89412e-20	6.02777e-19
ENSG00000100284.19	7116.53	1.1319	0.123244	9.18424	4.14458e-20	6.41078e-19
ENSG00000224557.6	152.502	-2.16668	0.235937	-9.1833	4.18092e-20	6.46228e-19
ENSG00000164128.5	131.76	-3.30982	0.360552	-9.17986	4.31646e-20	6.66692e-19
ENSG00000090554.11	144.836	-1.29965	0.141621	-9.17692	4.436e-20	6.84656e-19
ENSG00000225342.2	22.7049	-1.61228	0.175736	-9.17443	4.53976e-20	7.0016e-19
ENSG00000137496.16	2291.12	-1.499	0.163421	-9.17266	4.61499e-20	7.11246e-19
ENSG00000184922.12	3309.65	-1.34773	0.146963	-9.17057	4.70522e-20	7.24625e-19
ENSG00000213999.14	40.1085	-1.74796	0.190634	-9.16917	4.76664e-20	7.33551e-19
ENSG00000177628.14	10733.8	1.24211	0.135468	9.16907	4.77121e-20	7.3372e-19
ENSG00000123728.8	1280.85	-0.876058	0.0955595	-9.16767	4.83339e-20	7.42743e-19
ENSG00000146216.10	22.2494	-1.4276	0.155747	-9.16615	4.90225e-20	7.5278e-19
ENSG00000118960.11	3615.55	0.814755	0.0889418	9.16054	5.16385e-20	7.92376e-19
ENSG00000110955.7	44303.7	0.789612	0.0861995	9.16028	5.17627e-20	7.93707e-19
ENSG00000093072.14	7380.05	-1.71931	0.187743	-9.15776	5.29835e-20	8.11839e-19
ENSG00000163328.12	1778.26	-1.64229	0.179347	-9.15707	5.33272e-20	8.16515e-19
ENSG00000175166.15	16650.5	0.720742	0.0787207	9.15568	5.40147e-20	8.26444e-19
ENSG00000180549.7	85.8323	-1.8304	0.199928	-9.15529	5.42122e-20	8.28413e-19
ENSG00000143819.11	15476.8	1.81213	0.197933	9.15527	5.42216e-20	8.28413e-19
ENSG00000119986.6	4070.37	1.50071	0.163921	9.1551	5.43068e-20	8.29117e-19
ENSG00000112343.10	2264.05	-0.586299	0.0640776	-9.14983	5.7025e-20	8.6999e-19
ENSG00000125319.13	464.804	0.93786	0.102528	9.14735	5.83457e-20	8.895e-19
ENSG00000102178.11	3837.11	0.641129	0.0701281	9.14226	6.11627e-20	9.31775e-19
ENSG00000211942.3	278.489	-3.20049	0.350192	-9.13923	6.29006e-20	9.57562e-19
ENSG00000215021.7	13159.3	0.627285	0.0686465	9.1379	6.36777e-20	9.68696e-19
ENSG00000108883.11	9899	0.589721	0.0645721	9.13275	6.67814e-20	1.01518e-18
ENSG00000211820.1	17.5929	-2.0228	0.221545	-9.13044	6.82241e-20	1.03637e-18
ENSG00000101938.13	713.274	-2.90596	0.318299	-9.12963	6.87341e-20	1.04337e-18
ENSG00000141076.16	3363.56	0.671836	0.073591	9.12933	6.89276e-20	1.04556e-18
ENSG00000267322.2	16.5457	-1.28754	0.141063	-9.12737	7.01803e-20	1.0638e-18
ENSG00000204261.7	904.483	-1.21286	0.132884	-9.12723	7.02765e-20	1.0645e-18
ENSG00000197586.11	8668.76	0.890903	0.0976409	9.12428	7.22158e-20	1.09309e-18
ENSG00000035862.11	73931.9	0.981094	0.107532	9.12374	7.25745e-20	1.09773e-18
ENSG00000158481.11	160.555	-2.07898	0.228086	-9.11492	7.87295e-20	1.18998e-18
ENSG00000149503.11	3435.7	0.869549	0.0954166	9.11318	8.00009e-20	1.20834e-18
ENSG00000188807.11	4021.04	0.965816	0.105992	9.11216	8.07569e-20	1.21889e-18
ENSG00000131475.5	3549.01	0.682618	0.0749322	9.10981	8.25275e-20	1.24473e-18
ENSG00000144233.8	3089.34	0.680478	0.0747087	9.10842	8.35889e-20	1.25917e-18
ENSG00000103154.8	223.574	2.63962	0.289801	9.1084	8.36037e-20	1.25917e-18
ENSG00000166128.11	2221.82	-0.950116	0.104387	-9.10183	8.88192e-20	1.33677e-18
ENSG00000100342.19	7956.64	-1.63585	0.179774	-9.09953	9.07276e-20	1.36452e-18
ENSG00000084693.14	2076.31	0.715141	0.0786065	9.09773	9.22369e-20	1.38624e-18
ENSG00000134830.5	80.4733	-1.30311	0.143255	-9.09644	9.33387e-20	1.4018e-18
ENSG00000004142.10	8107.98	0.723035	0.0795056	9.09414	9.53419e-20	1.43087e-18
ENSG00000165092.11	3115.87	-1.72189	0.189397	-9.09139	9.77812e-20	1.46644e-18
ENSG00000099958.13	1317.88	-1.7572	0.193353	-9.08805	1.00833e-19	1.51115e-18
ENSG00000254415.3	306.407	-1.90584	0.20978	-9.08493	1.03769e-19	1.55404e-18
ENSG00000258839.2	2014.73	1.67274	0.184133	9.08439	1.04284e-19	1.56066e-18
ENSG00000106546.11	4592.51	-1.36597	0.150399	-9.08233	1.06278e-19	1.58937e-18
ENSG00000196663.14	3410.1	1.02859	0.113314	9.07738	1.11224e-19	1.66217e-18
ENSG00000104951.14	1620.9	-1.76414	0.194382	-9.07564	1.13014e-19	1.68772e-18
ENSG00000102302.7	3486.82	0.976633	0.107633	9.07371	1.1503e-19	1.71662e-18
ENSG00000198964.12	490.89	-1.00142	0.110366	-9.07361	1.15143e-19	1.7171e-18
ENSG00000005187.10	73.2402	-1.48045	0.163162	-9.07352	1.15233e-19	1.71722e-18
ENSG00000109689.13	1667.8	-0.956929	0.105516	-9.06909	1.2002e-19	1.78732e-18
ENSG00000237945.6	281.037	-1.73691	0.19154	-9.06814	1.2107e-19	1.80169e-18
ENSG00000092200.11	35.9954	-1.26322	0.139416	-9.06077	1.29532e-19	1.92626e-18
ENSG00000133800.7	219.725	-2.02569	0.223713	-9.05484	1.36764e-19	2.03237e-18
ENSG00000198833.6	4383.35	-0.723038	0.0798572	-9.05413	1.37657e-19	2.0442e-18
ENSG00000211745.3	69.4408	-2.42672	0.268027	-9.05401	1.37812e-19	2.04428e-18
ENSG00000237928.4	54.2484	-1.99449	0.220289	-9.05394	1.37906e-19	2.04428e-18
ENSG00000275700.3	5533.38	0.650127	0.0718063	9.0539	1.37951e-19	2.04428e-18
ENSG00000040608.12	1322.32	1.79058	0.19778	9.05337	1.38626e-19	2.05285e-18
ENSG00000184470.18	2139.06	0.910761	0.100601	9.0532	1.38845e-19	2.05465e-18
ENSG00000120594.15	1450.25	-1.45852	0.161118	-9.05254	1.39686e-19	2.06565e-18
ENSG00000196976.6	2172.19	0.939575	0.103819	9.05016	1.42757e-19	2.10961e-18
ENSG00000053108.15	228.002	2.23259	0.246714	9.0493	1.43886e-19	2.1248e-18
ENSG00000242371.1	89.2342	-3.29463	0.364341	-9.04271	1.52832e-19	2.25533e-18
ENSG00000214872.7	20.1085	-1.77265	0.19609	-9.03998	1.56706e-19	2.31089e-18
ENSG00000114544.14	3517.25	0.696983	0.0771539	9.03366	1.66023e-19	2.44659e-18
ENSG00000180354.14	2688.52	1.45805	0.161403	9.03357	1.66158e-19	2.44688e-18
ENSG00000104833.9	16824.7	2.04817	0.226734	9.03336	1.66487e-19	2.45002e-18
ENSG00000033011.10	1927.3	0.752715	0.0833531	9.03044	1.70986e-19	2.51448e-18
ENSG00000166342.17	24.7696	-2.63	0.291267	-9.02953	1.72418e-19	2.53379e-18
ENSG00000168944.14	787.636	-0.977829	0.108345	-9.02515	1.79444e-19	2.6352e-18
ENSG00000103202.11	9835.48	1.12681	0.124908	9.02116	1.86105e-19	2.73113e-18
ENSG00000071553.15	23865.1	0.996806	0.110498	9.021	1.8638e-19	2.73328e-18
ENSG00000141562.16	4612.31	0.868616	0.0963001	9.01989	1.88272e-19	2.75911e-18
ENSG00000162711.15	246.419	-1.33474	0.148005	-9.01822	1.91165e-19	2.79957e-18
ENSG00000244005.11	1565.68	0.625362	0.0693525	9.01716	1.93036e-19	2.82501e-18
ENSG00000162723.8	321.876	2.7564	0.305805	9.01361	1.99375e-19	2.91577e-18
ENSG00000161643.11	61.5962	-1.89881	0.210671	-9.01318	2.00168e-19	2.92535e-18
ENSG00000023902.12	4340.95	-1.06719	0.118433	-9.01085	2.04472e-19	2.9862e-18
ENSG00000155792.8	529.982	-1.3487	0.149751	-9.00629	2.13136e-19	3.11058e-18
ENSG00000005156.10	2167.01	0.696523	0.0773393	9.00607	2.13574e-19	3.11483e-18
ENSG00000242372.5	9048.38	0.847695	0.0941327	9.00532	2.15037e-19	3.13401e-18
ENSG00000161202.16	8963.17	0.775501	0.0861411	9.00269	2.20249e-19	3.20777e-18
ENSG00000164398.11	77.5221	-1.98694	0.220843	-8.9971	2.31754e-19	3.373e-18
ENSG00000196092.11	884.817	-3.03191	0.337002	-8.99671	2.32577e-19	3.38266e-18
ENSG00000185404.15	991.828	-1.07499	0.119495	-8.99612	2.33836e-19	3.39709e-18
ENSG00000276231.3	266.66	-1.60134	0.178004	-8.99609	2.3389e-19	3.39709e-18
ENSG00000188158.13	105.039	-1.43626	0.159661	-8.99571	2.34715e-19	3.40675e-18
ENSG00000167965.16	4367.57	0.930163	0.103408	8.99512	2.35973e-19	3.42266e-18
ENSG00000125485.16	1034.98	0.567921	0.0631466	8.99369	2.39067e-19	3.46516e-18
ENSG00000073670.12	666.927	2.29853	0.255577	8.9935	2.3948e-19	3.46878e-18
ENSG00000278982.1	39.1934	-1.57736	0.175436	-8.99109	2.44789e-19	3.54243e-18
ENSG00000134198.8	59.3186	-1.5248	0.169591	-8.99104	2.44899e-19	3.54243e-18
ENSG00000182957.14	1968.07	-1.03253	0.114857	-8.98963	2.48063e-19	3.58575e-18
ENSG00000150510.14	668.636	1.23316	0.137197	8.98823	2.51236e-19	3.62914e-18
ENSG00000012124.13	2160.83	-2.00892	0.223794	-8.97665	2.79132e-19	4.02935e-18
ENSG00000158669.10	11115.6	0.859684	0.0957844	8.9752	2.82846e-19	4.08018e-18
ENSG00000136718.8	4729.25	0.686119	0.0764702	8.97237	2.90208e-19	4.18353e-18
ENSG00000197905.7	1529.79	1.0036	0.111856	8.97227	2.90468e-19	4.18444e-18
ENSG00000164330.15	304.455	-1.26816	0.141357	-8.97133	2.92943e-19	4.21722e-18
ENSG00000153443.11	1935.65	1.00438	0.111982	8.96913	2.98854e-19	4.2994e-18
ENSG00000173511.8	10099.9	1.01184	0.112818	8.96884	2.99666e-19	4.30816e-18
ENSG00000119421.6	2880.25	0.770996	0.0860804	8.9567	3.34548e-19	4.80638e-18
ENSG00000110080.17	12621	1.06988	0.119549	8.94935	3.57593e-19	5.13398e-18
ENSG00000168497.4	224.36	-1.71841	0.192018	-8.9492	3.5806e-19	5.1372e-18
ENSG00000042062.10	111.206	-1.55189	0.1735	-8.94463	3.73206e-19	5.34781e-18
ENSG00000124334.15	15.9382	-1.79864	0.201086	-8.94462	3.73244e-19	5.34781e-18
ENSG00000196954.11	3029.09	-0.751873	0.0840966	-8.94059	3.87106e-19	5.54268e-18
ENSG00000198523.5	75.4619	-2.05705	0.230084	-8.94046	3.87567e-19	5.54553e-18
ENSG00000259976.1	506.706	-1.10954	0.124104	-8.94038	3.87839e-19	5.54569e-18
ENSG00000211710.3	35.154	-2.29557	0.256804	-8.93901	3.9267e-19	5.61098e-18
ENSG00000107130.8	4727.17	1.2669	0.141755	8.93723	3.99042e-19	5.69728e-18
ENSG00000270547.4	73.9738	-1.81153	0.202696	-8.93717	3.99248e-19	5.69728e-18
ENSG00000179477.8	74.4534	3.28851	0.36804	8.93522	4.06373e-19	5.79506e-18
ENSG00000164818.14	2931.53	0.646966	0.0724269	8.93267	4.15832e-19	5.92595e-18
ENSG00000137411.15	3948.92	0.732581	0.0820143	8.93235	4.1704e-19	5.93917e-18
ENSG00000228839.4	8.69822	-1.40157	0.156917	-8.93193	4.18633e-19	5.95786e-18
ENSG00000251211.1	29.5936	1.51672	0.169886	8.92784	4.34426e-19	6.17847e-18
ENSG00000133027.16	1781.51	1.16421	0.130446	8.9249	4.46101e-19	6.34026e-18
ENSG00000196497.14	578.172	0.917389	0.102813	8.92285	4.54443e-19	6.4545e-18
ENSG00000091490.9	2853.64	-1.66446	0.186543	-8.92267	4.55166e-19	6.46043e-18
ENSG00000165698.14	566.332	1.12775	0.126443	8.91906	4.70283e-19	6.67053e-18
ENSG00000110844.12	479.774	0.729423	0.0817891	8.91834	4.73332e-19	6.70929e-18
ENSG00000158555.13	3533.36	1.55864	0.174775	8.91797	4.74934e-19	6.72462e-18
ENSG00000147164.10	4778.35	0.544854	0.0610964	8.91794	4.75049e-19	6.72462e-18
ENSG00000203709.8	53.6186	-1.76593	0.198029	-8.91752	4.76854e-19	6.74567e-18
ENSG00000276718.1	20.1054	-1.30315	0.146165	-8.91564	4.84989e-19	6.85617e-18
ENSG00000259070.4	22.8731	-1.73864	0.195028	-8.91482	4.88609e-19	6.90274e-18
ENSG00000134775.14	1551.87	1.52629	0.171227	8.91385	4.929e-19	6.95873e-18
ENSG00000189334.7	670.296	3.58626	0.402381	8.91259	4.98535e-19	7.0336e-18
ENSG00000158717.9	1372.77	-0.710263	0.0797067	-8.91095	5.05964e-19	7.13366e-18
ENSG00000137573.12	3722.97	-1.63961	0.184061	-8.90796	5.19783e-19	7.32361e-18
ENSG00000118369.11	937.249	1.07075	0.120239	8.90519	5.32967e-19	7.50439e-18
ENSG00000157107.12	898.617	-1.0236	0.114949	-8.90483	5.34695e-19	7.52372e-18
ENSG00000213923.9	9132.36	0.722823	0.0811817	8.90378	5.39775e-19	7.59016e-18
ENSG00000139725.6	138.894	-1.25624	0.141124	-8.90168	5.50054e-19	7.72957e-18
ENSG00000112787.11	3692.4	0.79406	0.0892132	8.9007	5.54966e-19	7.79343e-18
ENSG00000023892.10	1513.47	-1.33779	0.15031	-8.9002	5.57458e-19	7.82324e-18
ENSG00000183049.11	704.148	-1.44502	0.162433	-8.89611	5.7839e-19	8.11163e-18
ENSG00000035664.10	235.795	-1.28654	0.144623	-8.89583	5.79862e-19	8.12689e-18
ENSG00000198700.8	7636.09	0.656602	0.0738342	8.89292	5.95247e-19	8.33701e-18
ENSG00000108262.14	9582.71	0.806064	0.0906787	8.88923	6.15345e-19	8.6128e-18
ENSG00000170476.14	2628.08	-2.46557	0.277385	-8.88863	6.1869e-19	8.6539e-18
ENSG00000180509.10	24.0265	-1.78032	0.200385	-8.8845	6.42076e-19	8.97509e-18
ENSG00000166557.11	8766.06	0.831145	0.0935702	8.88259	6.53235e-19	9.12505e-18
ENSG00000225670.4	19.7379	-2.27644	0.256322	-8.88117	6.61592e-19	9.2357e-18
ENSG00000151692.13	4128.71	0.919061	0.103504	8.87944	6.71992e-19	9.37471e-18
ENSG00000185252.16	1144.55	0.728246	0.0820167	8.87924	6.73164e-19	9.38487e-18
ENSG00000153404.12	204.075	2.46202	0.277323	8.87778	6.82051e-19	9.50253e-18
ENSG00000187796.12	279.415	-1.09997	0.123911	-8.8771	6.86259e-19	9.55487e-18
ENSG00000137216.17	4756.69	0.839591	0.0946289	8.87246	7.1546e-19	9.95491e-18
ENSG00000137478.13	1458.16	-0.903882	0.101888	-8.87134	7.22705e-19	1.00483e-17
ENSG00000027075.12	1805.81	-0.966671	0.108966	-8.87128	7.23124e-19	1.00483e-17
ENSG00000109066.12	3142.34	0.891719	0.100519	8.87119	7.23691e-19	1.00496e-17
ENSG00000143198.11	7199.94	0.907839	0.102361	8.86902	7.37936e-19	1.02407e-17
ENSG00000047365.10	876.821	-1.29989	0.146572	-8.86863	7.40538e-19	1.02701e-17
ENSG00000134321.10	671.409	-1.86528	0.21033	-8.86837	7.42245e-19	1.02871e-17
ENSG00000155158.19	372.303	-1.14925	0.129636	-8.86517	7.63899e-19	1.05802e-17
ENSG00000143333.6	884.685	-1.46767	0.165642	-8.86052	7.96417e-19	1.10234e-17
ENSG00000115507.8	296.794	1.75475	0.198055	8.85988	8.01035e-19	1.10801e-17
ENSG00000160785.12	3732.3	0.777527	0.0877673	8.85896	8.07619e-19	1.11639e-17
ENSG00000171817.15	63.278	-1.31539	0.14851	-8.85725	8.20134e-19	1.13295e-17
ENSG00000148331.10	2457.73	0.761758	0.0860249	8.85509	8.36134e-19	1.1543e-17
ENSG00000131018.21	2749.05	-0.834118	0.0942006	-8.8547	8.39057e-19	1.15758e-17
ENSG00000131650.12	521.239	1.68696	0.190607	8.85047	8.71551e-19	1.20146e-17
ENSG00000124507.9	97.8986	-1.73374	0.195894	-8.85041	8.71999e-19	1.20146e-17
ENSG00000248008.2	425.182	0.660121	0.0745905	8.84993	8.75709e-19	1.20579e-17
ENSG00000253608.1	34.8357	2.51603	0.284344	8.84853	8.8677e-19	1.22023e-17
ENSG00000166523.6	191.423	-1.84333	0.208347	-8.84742	8.95623e-19	1.23161e-17
ENSG00000140511.10	1930.75	-1.15227	0.130258	-8.84606	9.06622e-19	1.24593e-17
ENSG00000096384.18	113181	0.656035	0.0741624	8.84593	9.07709e-19	1.24661e-17
ENSG00000129451.10	353.863	3.46886	0.392185	8.84496	9.15638e-19	1.25669e-17
ENSG00000124562.8	6237.45	0.69666	0.0787999	8.84088	9.49648e-19	1.30252e-17
ENSG00000074317.9	311.259	2.80915	0.31777	8.84021	9.55378e-19	1.30954e-17
ENSG00000119801.11	3322.3	-0.600186	0.0679238	-8.83616	9.90628e-19	1.35698e-17
ENSG00000137274.11	1118.61	0.752271	0.0851791	8.83164	1.03153e-18	1.41209e-17
ENSG00000113580.13	2619.37	-0.940719	0.106523	-8.83114	1.03618e-18	1.41754e-17
ENSG00000131378.12	2353.48	-1.11615	0.126415	-8.8293	1.05334e-18	1.44008e-17
ENSG00000204394.11	13064.1	0.823414	0.0932774	8.82758	1.06969e-18	1.46149e-17
ENSG00000256553.1	22.175	-2.20392	0.249712	-8.82586	1.08621e-18	1.48311e-17
ENSG00000099960.11	1404.36	2.77781	0.314746	8.82554	1.08929e-18	1.48635e-17
ENSG00000148291.8	1044.38	0.886098	0.100407	8.82503	1.09432e-18	1.49226e-17
ENSG00000144619.13	169.324	-2.33317	0.264493	-8.82129	1.13144e-18	1.54188e-17
ENSG00000130177.13	6516.39	0.761414	0.0863502	8.81775	1.16784e-18	1.59048e-17
ENSG00000178921.12	3059.74	0.723254	0.0820399	8.81589	1.18743e-18	1.61611e-17
ENSG00000174125.6	490.876	-1.22516	0.139067	-8.80985	1.25317e-18	1.70449e-17
ENSG00000237943.5	118.52	-1.733	0.196795	-8.80614	1.29534e-18	1.76071e-17
ENSG00000069998.11	2503.64	0.701599	0.0796753	8.80573	1.30005e-18	1.76598e-17
ENSG00000227591.4	9.34935	-1.96483	0.223156	-8.80472	1.31174e-18	1.78072e-17
ENSG00000108846.14	538.041	-1.71561	0.194862	-8.80424	1.31737e-18	1.78722e-17
ENSG00000272250.1	7.74928	-1.47623	0.167778	-8.79869	1.38419e-18	1.87667e-17
ENSG00000162888.4	9.81995	-1.4136	0.160793	-8.79145	1.4764e-18	2.0004e-17
ENSG00000237522.1	24.3882	-1.37974	0.156983	-8.78907	1.50797e-18	2.04188e-17
ENSG00000113240.11	546.548	-1.13539	0.129221	-8.78638	1.54454e-18	2.09006e-17
ENSG00000183207.11	7830.66	0.929507	0.105801	8.78539	1.55828e-18	2.10731e-17
ENSG00000132153.13	7871.86	0.646509	0.0735942	8.78478	1.56671e-18	2.11735e-17
ENSG00000211943.2	2045.48	-2.80648	0.319499	-8.78399	1.57783e-18	2.13102e-17
ENSG00000081277.10	2735.39	3.64824	0.415355	8.78342	1.5858e-18	2.14043e-17
ENSG00000162066.13	2943.49	1.09356	0.124542	8.78066	1.62513e-18	2.19209e-17
ENSG00000124496.11	566.832	-1.27114	0.144767	-8.78059	1.62615e-18	2.19209e-17
ENSG00000259040.4	11.9731	-1.55047	0.176661	-8.77652	1.68612e-18	2.27149e-17
ENSG00000168765.14	2798.54	1.04844	0.119492	8.77417	1.72172e-18	2.31798e-17
ENSG00000005108.14	128.417	-1.51473	0.172662	-8.77282	1.74245e-18	2.3444e-17
ENSG00000144567.9	10705.1	0.687257	0.0783568	8.77087	1.77296e-18	2.38394e-17
ENSG00000119922.8	1261.41	-1.29232	0.147378	-8.76872	1.80704e-18	2.42822e-17
ENSG00000130592.12	6864.84	-1.49291	0.170287	-8.76704	1.83429e-18	2.46328e-17
ENSG00000109519.11	2402.82	0.554073	0.0632075	8.76593	1.85247e-18	2.48612e-17
ENSG00000196365.10	9888.97	0.899405	0.102607	8.76549	1.8596e-18	2.4941e-17
ENSG00000005059.14	719.964	-1.1781	0.134416	-8.76457	1.87493e-18	2.51307e-17
ENSG00000070540.11	7069.03	1.16455	0.13298	8.75735	1.99889e-18	2.67753e-17
ENSG00000132361.15	8566.23	0.911996	0.104144	8.75706	2.00418e-18	2.68291e-17
ENSG00000254709.5	8738.6	-2.75835	0.315033	-8.75575	2.0276e-18	2.71255e-17
ENSG00000090273.12	9261.6	0.680973	0.0777887	8.75414	2.05672e-18	2.74978e-17
ENSG00000166833.18	9715.1	1.24073	0.141777	8.7513	2.10916e-18	2.81812e-17
ENSG00000100865.13	2280.55	0.692525	0.0791402	8.75061	2.12211e-18	2.83363e-17
ENSG00000124107.5	472.817	3.2511	0.371546	8.75019	2.13003e-18	2.84241e-17
ENSG00000196449.3	1402.36	0.569849	0.0651705	8.74396	2.25079e-18	3.00167e-17
ENSG00000130487.5	370.407	-1.68256	0.192494	-8.74083	2.31404e-18	3.08407e-17
ENSG00000272927.1	17.2354	-1.86119	0.212937	-8.74055	2.31988e-18	3.08991e-17
ENSG00000088247.14	17397.5	0.700704	0.0801689	8.74035	2.32385e-18	3.09326e-17
ENSG00000094963.12	213.575	-1.99616	0.228389	-8.7402	2.32705e-18	3.09557e-17
ENSG00000038295.6	63.864	-1.92831	0.220654	-8.73905	2.35069e-18	3.12507e-17
ENSG00000110104.10	2771.26	0.769321	0.0880507	8.73725	2.38858e-18	3.17345e-17
ENSG00000013306.14	10628.1	0.842631	0.0964937	8.7325	2.49113e-18	3.30761e-17
ENSG00000197329.10	1313.77	-0.874292	0.100144	-8.73035	2.53875e-18	3.36874e-17
ENSG00000155093.16	207.47	-1.3838	0.158534	-8.72872	2.57572e-18	3.41565e-17
ENSG00000074370.16	3863.22	-1.5356	0.175946	-8.72768	2.59946e-18	3.44497e-17
ENSG00000129538.12	11802.5	-1.69002	0.193718	-8.72414	2.6821e-18	3.55228e-17
ENSG00000249249.1	23.3931	-1.08868	0.124802	-8.72328	2.70247e-18	3.57702e-17
ENSG00000148840.9	3718.18	0.657396	0.0753719	8.72202	2.73273e-18	3.61481e-17
ENSG00000211648.2	2436.79	-2.81945	0.323399	-8.71817	2.8274e-18	3.73771e-17
ENSG00000077009.12	592.918	3.42828	0.393456	8.71323	2.95327e-18	3.90166e-17
ENSG00000211791.2	20.3038	-2.19972	0.252533	-8.7106	3.02283e-18	3.99108e-17
ENSG00000164543.5	2035.88	-0.987377	0.11336	-8.71013	3.03528e-18	4.00502e-17
ENSG00000167114.11	4309.17	1.07671	0.12364	8.7084	3.08197e-18	4.06409e-17
ENSG00000135587.7	1181.52	1.07218	0.123144	8.70667	3.12929e-18	4.12392e-17
ENSG00000271614.1	79.4883	-1.12644	0.129426	-8.70335	3.22227e-18	4.24383e-17
ENSG00000178952.7	16709	0.68442	0.0786469	8.70244	3.24814e-18	4.27524e-17
ENSG00000084463.6	8326.25	0.628454	0.0722387	8.69969	3.32783e-18	4.37741e-17
ENSG00000247077.5	2889.75	0.586762	0.0674504	8.69916	3.3434e-18	4.39516e-17
ENSG00000139679.14	1143.72	-1.21215	0.13935	-8.69857	3.36096e-18	4.4155e-17
ENSG00000115594.10	1600.18	-1.21833	0.140074	-8.6978	3.38378e-18	4.44274e-17
ENSG00000168268.9	4480.59	1.07264	0.12334	8.69661	3.41934e-18	4.48665e-17
ENSG00000206538.6	280.656	-1.57987	0.181684	-8.69571	3.44674e-18	4.51979e-17
ENSG00000161911.10	31.489	-1.60524	0.184634	-8.69417	3.49373e-18	4.57857e-17
ENSG00000100647.7	3253.82	-0.654687	0.0753052	-8.69378	3.50591e-18	4.59171e-17
ENSG00000006453.12	2134.63	1.54944	0.178227	8.6936	3.51139e-18	4.59604e-17
ENSG00000166035.9	30.0342	-1.65194	0.190025	-8.69328	3.52133e-18	4.60621e-17
ENSG00000216490.3	101.949	-1.2434	0.143041	-8.69259	3.54257e-18	4.63112e-17
ENSG00000234814.6	38.4057	-1.24479	0.143234	-8.6906	3.6054e-18	4.71036e-17
ENSG00000144749.12	800.586	-1.19416	0.137452	-8.68782	3.69445e-18	4.82373e-17
ENSG00000241313.2	34.6774	1.25573	0.144541	8.68766	3.69993e-18	4.82791e-17
ENSG00000113722.15	19.5319	-1.67316	0.192594	-8.6875	3.70492e-18	4.83144e-17
ENSG00000236559.1	6.87265	-1.54521	0.177884	-8.68661	3.73403e-18	4.86641e-17
ENSG00000265975.1	21.0111	-1.51449	0.174365	-8.68573	3.76329e-18	4.90154e-17
ENSG00000211895.4	43192.1	-2.4582	0.283063	-8.68428	3.81163e-18	4.96144e-17
ENSG00000100462.14	3423.02	0.71695	0.0825632	8.68364	3.83295e-18	4.98613e-17
ENSG00000136634.5	72.6667	-1.51617	0.17467	-8.68015	3.95234e-18	5.13828e-17
ENSG00000211970.3	455.503	-3.1861	0.36709	-8.67936	3.97997e-18	5.17103e-17
ENSG00000152672.6	20.5993	-2.2526	0.25954	-8.67921	3.98518e-18	5.17463e-17
ENSG00000137628.15	1643.79	-1.33586	0.15396	-8.67666	4.07564e-18	5.28566e-17
ENSG00000104921.13	516.686	-3.16848	0.365173	-8.67666	4.07568e-18	5.28566e-17
ENSG00000147162.12	5765.78	-0.924386	0.106544	-8.67612	4.09498e-18	5.30744e-17
ENSG00000106785.13	2206.42	-0.860034	0.0991467	-8.67436	4.15875e-18	5.3868e-17
ENSG00000133985.2	263.259	-1.75872	0.202758	-8.67397	4.17329e-18	5.40233e-17
ENSG00000085514.14	673.943	-1.42794	0.164626	-8.67383	4.17819e-18	5.40537e-17
ENSG00000117152.12	162.136	-1.55634	0.179516	-8.66967	4.3339e-18	5.60339e-17
ENSG00000260911.2	8.76686	-1.52708	0.176169	-8.66826	4.38767e-18	5.66946e-17
ENSG00000229124.5	115.094	-1.07439	0.123954	-8.6677	4.40954e-18	5.69425e-17
ENSG00000261594.3	328.069	1.80785	0.208587	8.66713	4.43149e-18	5.71911e-17
ENSG00000187773.8	1035.98	2.44705	0.282387	8.66559	4.49186e-18	5.79349e-17
ENSG00000162630.5	41.1544	-2.1401	0.247001	-8.66435	4.54096e-18	5.85326e-17
ENSG00000272463.1	46.4925	-1.83575	0.211877	-8.66421	4.54673e-18	5.85713e-17
ENSG00000145194.16	582.917	1.00379	0.115878	8.66247	4.61668e-18	5.9416e-17
ENSG00000197355.9	3669.93	0.95436	0.110172	8.66244	4.61791e-18	5.9416e-17
ENSG00000065923.8	728.095	-1.41698	0.163581	-8.66228	4.62439e-18	5.94633e-17
ENSG00000131171.11	5574.15	-0.617025	0.0712404	-8.66116	4.66967e-18	6.00091e-17
ENSG00000125971.15	9265.62	0.862124	0.0995713	8.65835	4.78626e-18	6.14701e-17
ENSG00000179921.13	72.0052	-1.42064	0.16409	-8.65769	4.81426e-18	6.17922e-17
ENSG00000099977.12	2249.96	0.836904	0.0966825	8.65621	4.87716e-18	6.25617e-17
ENSG00000266074.7	4262.32	0.984	0.113727	8.65227	5.04839e-18	6.47189e-17
ENSG00000211789.2	53.0591	-2.05071	0.237019	-8.65211	5.0556e-18	6.47722e-17
ENSG00000059378.11	2482.56	-1.0778	0.124576	-8.65175	5.07158e-18	6.49377e-17
ENSG00000089220.4	21259.4	0.732299	0.0847108	8.64469	5.39499e-18	6.9037e-17
ENSG00000166428.11	382.049	-1.72568	0.199664	-8.64293	5.47885e-18	7.00678e-17
ENSG00000165637.12	3494.55	0.652255	0.0754694	8.64264	5.4927e-18	7.02025e-17
ENSG00000214894.5	16.9288	-1.58876	0.183844	-8.6419	5.52837e-18	7.06158e-17
ENSG00000131653.11	6826.27	0.771385	0.0892635	8.64166	5.54037e-18	7.06841e-17
ENSG00000226816.2	11.7712	-1.69374	0.195997	-8.64166	5.54039e-18	7.06841e-17
ENSG00000102900.11	6688.69	0.822792	0.0952174	8.64119	5.56319e-18	7.09323e-17
ENSG00000175931.11	4216.7	0.718669	0.0831726	8.64069	5.58749e-18	7.11993e-17
ENSG00000029534.18	87.272	-1.46793	0.169897	-8.64014	5.61429e-18	7.14682e-17
ENSG00000153012.10	216.741	-1.47837	0.171105	-8.64012	5.61533e-18	7.14682e-17
ENSG00000169174.10	274.604	2.86913	0.332109	8.63911	5.66531e-18	7.2061e-17
ENSG00000167747.12	3609.75	0.92718	0.107335	8.63819	5.71122e-18	7.26013e-17
ENSG00000074527.10	318.237	-1.74378	0.201885	-8.63748	5.74657e-18	7.3007e-17
ENSG00000254231.1	8.13104	-1.29465	0.149902	-8.6366	5.79096e-18	7.34928e-17
ENSG00000060140.7	20.7337	-1.51327	0.175216	-8.63659	5.79175e-18	7.34928e-17
ENSG00000183856.9	2049.43	0.981135	0.113618	8.63538	5.85317e-18	7.42277e-17
ENSG00000143248.11	2075.21	-1.45089	0.168086	-8.63184	6.03747e-18	7.65192e-17
ENSG00000175793.11	2985.26	3.70191	0.428875	8.63168	6.04554e-18	7.65756e-17
ENSG00000234745.8	168520	-1.3245	0.15345	-8.63146	6.05711e-18	7.66764e-17
ENSG00000225964.4	11.5989	-2.10263	0.243603	-8.63139	6.06084e-18	7.66777e-17
ENSG00000149925.15	123649	1.01228	0.117304	8.62953	6.16066e-18	7.78941e-17
ENSG00000135436.7	47.2704	1.08259	0.125516	8.62515	6.40077e-18	8.08818e-17
ENSG00000188229.5	16742	0.997004	0.115599	8.62468	6.42694e-18	8.11237e-17
ENSG00000272567.1	5.66216	-1.20389	0.139587	-8.62467	6.42757e-18	8.11237e-17
ENSG00000131043.10	4014.11	0.609406	0.0706784	8.62223	6.56622e-18	8.28242e-17
ENSG00000105866.12	437.931	-1.04325	0.121028	-8.61992	6.69989e-18	8.446e-17
ENSG00000186188.9	33.8014	-1.5714	0.182309	-8.61945	6.72783e-18	8.47619e-17
ENSG00000137073.19	3136.39	0.771188	0.089483	8.61826	6.79764e-18	8.55905e-17
ENSG00000185664.13	750002	2.19018	0.254143	8.61789	6.81975e-18	8.58179e-17
ENSG00000228288.5	436.97	1.39044	0.161458	8.61176	7.19465e-18	9.04818e-17
ENSG00000185291.9	538.11	-1.0794	0.125363	-8.61023	7.29132e-18	9.16431e-17
ENSG00000168961.15	4054.26	-1.35491	0.157392	-8.60849	7.40275e-18	9.29886e-17
ENSG00000159111.11	3290.16	0.592976	0.068905	8.6057	7.58529e-18	9.5225e-17
ENSG00000156219.15	125.671	-2.29021	0.266178	-8.60404	7.69597e-18	9.65573e-17
ENSG00000134602.14	356.635	-1.70201	0.197836	-8.60311	7.75855e-18	9.72848e-17
ENSG00000177103.12	12.5382	-1.86784	0.21714	-8.602	7.83364e-18	9.81684e-17
ENSG00000261616.1	42.6647	-1.71234	0.199078	-8.60137	7.87705e-18	9.8654e-17
ENSG00000116857.15	4978.6	0.735236	0.0854829	8.60096	7.9049e-18	9.89444e-17
ENSG00000185433.7	18.5209	-2.08917	0.242938	-8.59959	8.00013e-18	1.00077e-16
ENSG00000143184.4	74.7905	-1.88859	0.219668	-8.59746	8.15012e-18	1.01893e-16
ENSG00000105447.11	3941.06	0.77268	0.0899076	8.59416	8.3877e-18	1.04802e-16
ENSG00000104866.9	5711.77	0.95571	0.111243	8.59117	8.60877e-18	1.07501e-16
ENSG00000270164.1	132.463	-1.70073	0.19798	-8.59044	8.66344e-18	1.0812e-16
ENSG00000272825.1	22.2105	-1.27674	0.148679	-8.58723	8.90887e-18	1.11117e-16
ENSG00000090659.16	693.649	-1.61079	0.187586	-8.58697	8.92911e-18	1.11304e-16
ENSG00000186891.12	210.231	-1.47539	0.171835	-8.58605	9.001e-18	1.12134e-16
ENSG00000136869.13	849.273	-1.51748	0.176772	-8.58439	9.1317e-18	1.13696e-16
ENSG00000172270.17	74937.6	1.08788	0.126745	8.5832	9.22715e-18	1.14816e-16
ENSG00000184009.8	286921	0.757986	0.0883187	8.58239	9.29186e-18	1.15554e-16
ENSG00000229391.6	2944.9	-1.83058	0.213307	-8.5819	9.33208e-18	1.15986e-16
ENSG00000172469.13	566.16	-1.1736	0.136797	-8.57916	9.55697e-18	1.18711e-16
ENSG00000215193.11	3897.96	0.571138	0.0665867	8.57735	9.7084e-18	1.20522e-16
ENSG00000164761.7	178.098	-1.86793	0.217836	-8.57494	9.91372e-18	1.22999e-16
ENSG00000118894.13	720.846	0.620969	0.072445	8.57159	1.02063e-17	1.26554e-16
ENSG00000204356.10	5805.78	0.678645	0.0791855	8.57032	1.03195e-17	1.27884e-16
ENSG00000243678.10	5072.69	0.853475	0.0996068	8.56844	1.04894e-17	1.29912e-16
ENSG00000135632.10	2832.7	0.679984	0.0793696	8.56731	1.05932e-17	1.31122e-16
ENSG00000225556.1	131.942	1.22593	0.143119	8.56584	1.07287e-17	1.32722e-16
ENSG00000009830.10	2123.36	0.717738	0.0837996	8.56494	1.08135e-17	1.33692e-16
ENSG00000197540.6	306.573	-1.64951	0.192597	-8.56454	1.08509e-17	1.34076e-16
ENSG00000279086.1	23.6687	-1.44022	0.168172	-8.56395	1.09063e-17	1.34682e-16
ENSG00000008838.16	5943.77	0.722277	0.0843536	8.56249	1.10453e-17	1.3632e-16
ENSG00000174080.9	7635.56	1.13855	0.132975	8.56216	1.10774e-17	1.36636e-16
ENSG00000187116.12	196.651	-1.56379	0.182652	-8.56158	1.11332e-17	1.37245e-16
ENSG00000180921.6	3402.37	1.24488	0.145412	8.56106	1.11833e-17	1.37783e-16
ENSG00000175283.7	1540.37	0.782502	0.0914243	8.55901	1.13838e-17	1.40171e-16
ENSG00000169432.13	104.438	-2.30205	0.26901	-8.55747	1.15367e-17	1.41972e-16
ENSG00000164303.9	17.5789	-2.05664	0.240363	-8.55639	1.16454e-17	1.43225e-16
ENSG00000183826.15	2227.87	0.811703	0.094893	8.55388	1.19021e-17	1.46297e-16
ENSG00000280734.1	149.59	-1.26757	0.148189	-8.55368	1.19221e-17	1.46458e-16
ENSG00000171307.17	1980.51	0.753051	0.0880398	8.55354	1.19372e-17	1.46559e-16
ENSG00000171135.12	2916.82	0.652953	0.0763819	8.54852	1.24674e-17	1.5298e-16
ENSG00000010327.9	4114.55	-1.16297	0.13607	-8.5468	1.26543e-17	1.55184e-16
ENSG00000125354.21	3564.44	-1.14521	0.133999	-8.54638	1.27008e-17	1.55664e-16
ENSG00000101146.11	2667.76	0.554584	0.0648986	8.54539	1.28099e-17	1.5691e-16
ENSG00000141401.10	1487.81	1.26719	0.148366	8.54094	1.33139e-17	1.62989e-16
ENSG00000186469.7	3209.96	-1.23176	0.144222	-8.54071	1.33395e-17	1.63209e-16
ENSG00000130477.13	170.365	-2.06375	0.24173	-8.53742	1.37248e-17	1.67826e-16
ENSG00000189077.9	3786.24	0.933979	0.109416	8.53602	1.3893e-17	1.69785e-16
ENSG00000277972.1	1983.87	0.843726	0.0988651	8.53412	1.4123e-17	1.72496e-16
ENSG00000120337.8	16.908	-1.94483	0.227942	-8.53213	1.43673e-17	1.75378e-16
ENSG00000258733.4	52.0688	-1.22477	0.143549	-8.53206	1.4376e-17	1.75384e-16
ENSG00000164032.10	21785.8	0.835974	0.098004	8.53	1.46352e-17	1.78444e-16
ENSG00000100243.19	27740.6	1.04556	0.122616	8.52712	1.50031e-17	1.82823e-16
ENSG00000132591.10	3443.91	0.678485	0.079572	8.52669	1.506e-17	1.83412e-16
ENSG00000139645.9	6333.49	0.778916	0.0913937	8.52264	1.55952e-17	1.89821e-16
ENSG00000178035.10	11630.8	0.817979	0.0959864	8.52182	1.57063e-17	1.91063e-16
ENSG00000115657.11	544.884	0.965577	0.113321	8.52076	1.58513e-17	1.92716e-16
ENSG00000091879.12	648.699	-1.58906	0.186504	-8.52023	1.59239e-17	1.93489e-16
ENSG00000176083.16	137.95	-1.90927	0.224113	-8.51922	1.60625e-17	1.95061e-16
ENSG00000159063.11	3979.54	1.06503	0.125018	8.519	1.60934e-17	1.95324e-16
ENSG00000174851.13	4611.63	0.901256	0.105794	8.51893	1.6103e-17	1.95328e-16
ENSG00000145147.18	351.728	-1.35599	0.159261	-8.51424	1.6769e-17	2.03291e-16
ENSG00000244617.2	397.655	2.43769	0.286355	8.51283	1.69746e-17	2.05665e-16
ENSG00000133878.7	14.8822	-2.06013	0.242014	-8.51246	1.70281e-17	2.06196e-16
ENSG00000089820.14	3793.07	-1.2066	0.141754	-8.51194	1.71053e-17	2.07013e-16
ENSG00000066336.10	2872.09	-1.38972	0.163296	-8.51048	1.7322e-17	2.09515e-16
ENSG00000266389.1	11.4936	-1.68306	0.197773	-8.51006	1.73849e-17	2.10156e-16
ENSG00000197971.13	20055.6	1.06603	0.125304	8.50757	1.77623e-17	2.14595e-16
ENSG00000013583.7	2939.87	0.851866	0.100141	8.50666	1.79012e-17	2.16151e-16
ENSG00000064218.4	37.7024	-1.51256	0.177854	-8.50449	1.82388e-17	2.20102e-16
ENSG00000165724.5	1455.31	0.772367	0.0908221	8.50417	1.82898e-17	2.20521e-16
ENSG00000111640.13	300079	0.960574	0.112954	8.50414	1.82944e-17	2.20521e-16
ENSG00000266962.2	444.288	0.827887	0.0973696	8.50252	1.85523e-17	2.23503e-16
ENSG00000090447.10	1187.28	0.706423	0.0831192	8.49892	1.91361e-17	2.30405e-16
ENSG00000243238.1	172.587	-3.02915	0.356448	-8.49817	1.92601e-17	2.31766e-16
ENSG00000103550.12	1414.74	0.526058	0.0619541	8.4911	2.04689e-17	2.46172e-16
ENSG00000169435.12	33.0672	-2.22859	0.262495	-8.49003	2.06578e-17	2.48303e-16
ENSG00000108622.9	442.369	-1.29075	0.152035	-8.48978	2.0703e-17	2.48706e-16
ENSG00000126351.11	3629.96	0.829091	0.097672	8.48852	2.09281e-17	2.51268e-16
ENSG00000140403.11	8642.35	1.56024	0.183879	8.48515	2.15435e-17	2.5851e-16
ENSG00000101850.11	12543.5	1.87695	0.221323	8.48061	2.24022e-17	2.68662e-16
ENSG00000157593.15	10573.5	0.799976	0.0943365	8.48003	2.25132e-17	2.6984e-16
ENSG00000129925.9	12128.8	1.05912	0.124902	8.47964	2.25897e-17	2.70604e-16
ENSG00000178718.6	3620.44	1.31964	0.155639	8.47884	2.27454e-17	2.72315e-16
ENSG00000198106.8	23.2615	-1.71953	0.202898	-8.47484	2.35402e-17	2.81671e-16
ENSG00000103429.9	6667.38	0.615246	0.0726056	8.47381	2.37502e-17	2.84024e-16
ENSG00000119185.11	4185.2	0.759079	0.0895834	8.47343	2.38266e-17	2.84776e-16
ENSG00000182446.12	12044.5	0.699443	0.0825473	8.47324	2.38661e-17	2.85088e-16
ENSG00000104853.14	16415.7	0.98484	0.116236	8.47278	2.3961e-17	2.86061e-16
ENSG00000118946.10	296.757	-1.31144	0.154788	-8.47249	2.40209e-17	2.86614e-16
ENSG00000213047.10	543.894	-1.16965	0.138078	-8.47095	2.43398e-17	2.90255e-16
ENSG00000151320.9	1695.38	-2.01435	0.237817	-8.47019	2.44996e-17	2.91997e-16
ENSG00000115935.15	9799.7	-1.06829	0.126125	-8.47012	2.45143e-17	2.92008e-16
ENSG00000107485.14	344.192	-1.64231	0.193911	-8.4694	2.46669e-17	2.9366e-16
ENSG00000204381.10	296.75	-1.33951	0.158167	-8.46894	2.4764e-17	2.94652e-16
ENSG00000139546.9	2457.61	0.734899	0.0868445	8.46224	2.62284e-17	3.119e-16
ENSG00000276023.3	2171.02	0.91463	0.108089	8.46184	2.63183e-17	3.12794e-16
ENSG00000178184.14	1281.97	0.907927	0.107306	8.46109	2.64879e-17	3.14633e-16
ENSG00000137699.15	1420.15	3.77796	0.446525	8.46081	2.65534e-17	3.15235e-16
ENSG00000184967.5	2071.38	0.892983	0.105572	8.45853	2.70759e-17	3.21258e-16
ENSG00000141570.9	1020	0.695956	0.0822912	8.45724	2.73773e-17	3.24652e-16
ENSG00000215012.7	1621.9	0.701243	0.0829211	8.45675	2.74921e-17	3.25831e-16
ENSG00000117362.11	13994.6	0.713062	0.0843304	8.45558	2.77704e-17	3.28945e-16
ENSG00000011600.10	5130.03	-1.41056	0.166826	-8.45529	2.78398e-17	3.29582e-16
ENSG00000161944.15	51.1046	-1.46269	0.173013	-8.45424	2.80904e-17	3.32364e-16
ENSG00000143294.13	5194.65	0.673534	0.0796703	8.45401	2.81465e-17	3.32842e-16
ENSG00000110721.10	2188.62	0.87691	0.103733	8.45356	2.82551e-17	3.3394e-16
ENSG00000125967.15	2025.6	0.992292	0.117386	8.45321	2.83394e-17	3.34749e-16
ENSG00000239672.6	5507.28	0.811614	0.0960273	8.45192	2.86558e-17	3.38298e-16
ENSG00000146070.15	804.784	-1.59773	0.189092	-8.44948	2.92606e-17	3.45065e-16
ENSG00000178031.14	300.85	-1.64383	0.194548	-8.44947	2.92616e-17	3.45065e-16
ENSG00000137642.11	2166.4	-1.62864	0.192772	-8.44852	2.95027e-17	3.47715e-16
ENSG00000160075.11	10557.3	0.81727	0.0967514	8.44711	2.986e-17	3.51731e-16
ENSG00000171051.7	456.771	-1.56442	0.18528	-8.44355	3.07839e-17	3.62412e-16
ENSG00000111669.13	36392.9	0.853079	0.101043	8.44277	3.09909e-17	3.64646e-16
ENSG00000136156.11	17854	-0.78408	0.0928815	-8.44172	3.12699e-17	3.67725e-16
ENSG00000242887.1	108.869	-2.67396	0.316789	-8.44082	3.15111e-17	3.70356e-16
ENSG00000196230.11	75948.1	0.745596	0.0883377	8.44029	3.16544e-17	3.71834e-16
ENSG00000118292.7	480.967	-0.798135	0.0945696	-8.43965	3.18276e-17	3.73661e-16
ENSG00000161905.11	19.7865	-2.33187	0.276341	-8.43837	3.21799e-17	3.77589e-16
ENSG00000244701.1	37.9192	-1.1684	0.138488	-8.43689	3.25899e-17	3.82188e-16
ENSG00000137434.10	75.3609	1.24204	0.147326	8.43053	3.441e-17	4.03309e-16
ENSG00000241014.1	84.0256	-0.974108	0.115546	-8.43045	3.44333e-17	4.03358e-16
ENSG00000141577.12	2202.94	0.885496	0.105036	8.43037	3.44569e-17	4.03412e-16
ENSG00000213928.7	302.828	-1.09397	0.129793	-8.42863	3.49743e-17	4.09243e-16
ENSG00000160113.5	2329.12	0.917318	0.108844	8.42785	3.52075e-17	4.11745e-16
ENSG00000171509.14	13.9056	-1.88137	0.223256	-8.42696	3.5476e-17	4.14657e-16
ENSG00000171189.15	11.001	-1.33929	0.158936	-8.42656	3.5598e-17	4.15853e-16
ENSG00000100116.15	2089.71	1.19677	0.142064	8.42413	3.63448e-17	4.24343e-16
ENSG00000120254.14	3232.04	0.933961	0.110875	8.42355	3.65239e-17	4.262e-16
ENSG00000108479.10	2431.21	1.00999	0.11993	8.42149	3.7171e-17	4.33512e-16
ENSG00000141568.18	4523.09	0.576446	0.0684955	8.41582	3.90162e-17	4.54781e-16
ENSG00000100350.13	6409.09	1.14056	0.135592	8.41167	4.04208e-17	4.70708e-16
ENSG00000111249.12	20.5794	-1.73301	0.206025	-8.41165	4.0427e-17	4.70708e-16
ENSG00000211637.2	1250.81	-2.95359	0.351138	-8.41147	4.04911e-17	4.71196e-16
ENSG00000198399.13	2130.1	-0.815411	0.0969421	-8.41132	4.0542e-17	4.71318e-16
ENSG00000162300.10	596.927	0.762857	0.0906943	8.41131	4.05461e-17	4.71318e-16
ENSG00000166685.10	2970	0.701179	0.083375	8.40994	4.10209e-17	4.76575e-16
ENSG00000211949.3	7186.25	-2.68492	0.319268	-8.40959	4.1143e-17	4.77732e-16
ENSG00000211666.2	7064.46	-2.66229	0.316621	-8.40844	4.15517e-17	4.82214e-16
ENSG00000167604.12	271.064	-0.854283	0.101609	-8.40754	4.18697e-17	4.85638e-16
ENSG00000238105.6	140.635	-1.36423	0.162331	-8.40395	4.31713e-17	5.00462e-16
ENSG00000126106.12	1048.8	0.768409	0.0914414	8.4033	4.34121e-17	5.02977e-16
ENSG00000100321.13	6573.24	1.18671	0.141238	8.40223	4.38067e-17	5.07272e-16
ENSG00000114631.10	4358.69	1.54489	0.183978	8.39718	4.57342e-17	5.29303e-16
ENSG00000158022.6	4947.24	1.84339	0.219613	8.39381	4.70656e-17	5.44415e-16
ENSG00000204442.3	32.1707	-1.7604	0.209757	-8.3926	4.75495e-17	5.49712e-16
ENSG00000105369.8	2814.84	-2.31634	0.276022	-8.39186	4.78527e-17	5.52916e-16
ENSG00000179091.4	8811.32	0.838496	0.0999272	8.39106	4.81777e-17	5.56367e-16
ENSG00000187840.4	5793.26	1.12383	0.133937	8.39073	4.8313e-17	5.57626e-16
ENSG00000159352.14	10461.6	0.641876	0.0765226	8.38805	4.94252e-17	5.70152e-16
ENSG00000211952.3	251.603	-2.60288	0.310491	-8.38313	5.15396e-17	5.94219e-16
ENSG00000213876.4	13.2257	-1.50769	0.179851	-8.38297	5.16085e-17	5.9469e-16
ENSG00000141252.18	4565.71	0.790445	0.0943445	8.37829	5.37044e-17	6.18505e-16
ENSG00000171435.12	17.3563	-2.15652	0.257451	-8.37642	5.45638e-17	6.28062e-16
ENSG00000105641.3	11.9902	-1.76595	0.210828	-8.37627	5.46334e-17	6.28521e-16
ENSG00000164880.14	13987.9	0.827076	0.098745	8.37588	5.48147e-17	6.30265e-16
ENSG00000160688.17	3197.1	0.802752	0.0958852	8.37201	5.66416e-17	6.50918e-16
ENSG00000111271.13	1970.1	0.706255	0.0843651	8.37141	5.69352e-17	6.53937e-16
ENSG00000189013.13	99.8888	-2.06628	0.246876	-8.36973	5.77496e-17	6.62932e-16
ENSG00000115318.10	2610.12	-1.85179	0.22144	-8.36248	6.14158e-17	7.04636e-16
ENSG00000160949.15	2346.62	1.00779	0.12053	8.36128	6.20405e-17	7.11418e-16
ENSG00000211632.3	110.94	-2.67157	0.319585	-8.35952	6.29765e-17	7.2176e-16
ENSG00000197702.10	7663.22	0.745431	0.0891749	8.3592	6.31427e-17	7.23274e-16
ENSG00000248996.1	35.0947	-1.27724	0.152799	-8.35895	6.32798e-17	7.24453e-16
ENSG00000103876.10	4591.33	1.00053	0.11971	8.35797	6.38092e-17	7.30119e-16
ENSG00000171084.14	179.499	0.932429	0.111565	8.35773	6.39388e-17	7.31207e-16
ENSG00000170909.12	449.413	-1.53991	0.184384	-8.35166	6.73084e-17	7.69326e-16
ENSG00000174684.6	3205.25	0.770589	0.0922697	8.35148	6.74125e-17	7.70102e-16
ENSG00000106012.16	2748.73	1.07421	0.128651	8.34978	6.8392e-17	7.8087e-16
ENSG00000155066.14	170.844	2.6668	0.3194	8.34938	6.86198e-17	7.83049e-16
ENSG00000108829.9	12363.3	0.692733	0.0829758	8.34861	6.90688e-17	7.87749e-16
ENSG00000124615.16	1451.51	0.855564	0.102563	8.34185	7.3136e-17	8.33687e-16
ENSG00000211660.3	5259.04	-2.71945	0.326057	-8.34041	7.40317e-17	8.43444e-16
ENSG00000084623.10	14880.3	0.514059	0.0616402	8.33967	7.45002e-17	8.48326e-16
ENSG00000167536.12	326.629	1.00266	0.120265	8.33714	7.61076e-17	8.66163e-16
ENSG00000104889.4	2603.95	0.911555	0.109359	8.33542	7.72254e-17	8.78413e-16
ENSG00000133794.16	431.455	-0.712567	0.0854893	-8.33516	7.73914e-17	8.79829e-16
ENSG00000167118.9	6304.4	0.864149	0.103682	8.33462	7.77484e-17	8.83414e-16
ENSG00000083097.13	618.266	-0.789686	0.0947831	-8.33151	7.98163e-17	9.06424e-16
ENSG00000184371.12	4094.64	-1.16495	0.139909	-8.32646	8.32947e-17	9.4542e-16
ENSG00000125037.11	3964.57	0.544399	0.0653975	8.32446	8.47165e-17	9.61043e-16
ENSG00000205309.12	532.523	1.28909	0.154868	8.3238	8.51905e-17	9.65876e-16
ENSG00000073578.15	8767.55	0.792059	0.0951567	8.32374	8.52338e-17	9.65876e-16
ENSG00000167566.15	4674.11	0.976158	0.117301	8.32185	8.66022e-17	9.80859e-16
ENSG00000253837.1	19.5262	-1.52851	0.183688	-8.32124	8.70496e-17	9.854e-16
ENSG00000112640.13	5018.35	0.650481	0.0781868	8.31958	8.82786e-17	9.98778e-16
ENSG00000152578.11	10.2069	-1.90741	0.22927	-8.31948	8.83511e-17	9.99065e-16
ENSG00000153406.12	3316.2	0.786542	0.0945529	8.31854	8.90553e-17	1.00649e-15
ENSG00000175489.9	795.887	-1.40706	0.169169	-8.31747	8.98612e-17	1.01506e-15
ENSG00000154258.15	192.892	-1.81936	0.218752	-8.31702	9.02054e-17	1.0184e-15
ENSG00000211898.6	979.997	-2.88881	0.347372	-8.31618	9.08434e-17	1.02506e-15
ENSG00000241360.1	211.411	1.24808	0.150086	8.31575	9.117e-17	1.0282e-15
ENSG00000160683.4	52.7893	-2.85357	0.343229	-8.3139	9.26054e-17	1.04383e-15
ENSG00000038274.15	3132.55	-0.661307	0.0795532	-8.31277	9.34928e-17	1.05327e-15
ENSG00000125730.15	14297.8	-1.83944	0.221387	-8.30873	9.67329e-17	1.0892e-15
ENSG00000197785.12	3443.91	1.01717	0.122497	8.30364	1.00968e-16	1.13628e-15
ENSG00000119844.13	1268.1	-0.62037	0.0747302	-8.30146	1.02839e-16	1.15672e-15
ENSG00000167476.9	178.404	-2.00625	0.241709	-8.30026	1.03882e-16	1.16784e-15
ENSG00000141564.12	4829.46	0.782212	0.0942491	8.29941	1.04629e-16	1.17561e-15
ENSG00000182199.9	9462.04	0.754267	0.0908857	8.29907	1.04929e-16	1.17835e-15
ENSG00000033627.13	10241	0.885778	0.106734	8.29895	1.05032e-16	1.17888e-15
ENSG00000075213.9	676.258	-2.06125	0.248412	-8.2977	1.06146e-16	1.19075e-15
ENSG00000167553.13	7858	0.876328	0.105616	8.29733	1.06475e-16	1.19382e-15
ENSG00000054392.11	1105.69	1.10227	0.13288	8.29526	1.08349e-16	1.21418e-15
ENSG00000136271.9	6080.56	0.648271	0.0781515	8.29505	1.08538e-16	1.21566e-15
ENSG00000063438.15	545.481	1.64289	0.198063	8.29479	1.08778e-16	1.21719e-15
ENSG00000070961.13	2540	-1.0716	0.12919	-8.29478	1.0879e-16	1.21719e-15
ENSG00000167136.6	295.106	1.05279	0.126924	8.29459	1.08964e-16	1.2185e-15
ENSG00000103356.14	2335.53	0.629603	0.0759079	8.2943	1.0923e-16	1.22083e-15
ENSG00000022277.11	8993.57	0.681904	0.0822413	8.2915	1.11832e-16	1.24925e-15
ENSG00000050438.15	104.547	-1.35411	0.163339	-8.2902	1.1306e-16	1.2623e-15
ENSG00000101307.14	307.767	-1.5621	0.188434	-8.28993	1.13313e-16	1.26446e-15
ENSG00000143418.18	10051.5	0.670839	0.080949	8.28719	1.15954e-16	1.29325e-15
ENSG00000125648.13	5655.13	0.954797	0.115235	8.28564	1.17479e-16	1.30957e-15
ENSG00000154678.15	52.8735	-1.80936	0.218376	-8.28554	1.17578e-16	1.30999e-15
ENSG00000007402.10	246.81	2.08831	0.252048	8.28538	1.17737e-16	1.31107e-15
ENSG00000164062.11	9209.43	0.697628	0.0842242	8.28299	1.20125e-16	1.33696e-15
ENSG00000078902.14	6406.98	0.839078	0.101308	8.28246	1.20655e-16	1.34215e-15
ENSG00000171453.16	1849.08	0.596294	0.0719968	8.28223	1.20893e-16	1.34409e-15
ENSG00000154016.12	96.714	-1.47072	0.17758	-8.28201	1.21115e-16	1.34586e-15
ENSG00000115523.15	814.733	-1.79701	0.217008	-8.28088	1.2227e-16	1.35798e-15
ENSG00000211941.3	1909.64	-2.80501	0.338777	-8.27982	1.23359e-16	1.36935e-15
ENSG00000118620.11	304.833	-0.869394	0.105052	-8.27582	1.2758e-16	1.41547e-15
ENSG00000053371.11	3645.22	0.793275	0.0958715	8.27436	1.29149e-16	1.43213e-15
ENSG00000167207.10	351.863	-1.46122	0.176684	-8.27028	1.33644e-16	1.4812e-15
ENSG00000084676.14	2320.54	-0.551617	0.0667	-8.27012	1.33821e-16	1.48239e-15
ENSG00000076770.13	795.681	-1.24654	0.150754	-8.26867	1.35467e-16	1.49983e-15
ENSG00000143393.15	7760.64	0.684079	0.082739	8.26791	1.36325e-16	1.50854e-15
ENSG00000183628.11	324.024	1.44549	0.174873	8.26598	1.38555e-16	1.53219e-15
ENSG00000259321.1	12.7792	-1.12204	0.135743	-8.26593	1.38606e-16	1.53219e-15
ENSG00000268655.1	40.0513	1.69533	0.205115	8.26524	1.39409e-16	1.54026e-15
ENSG00000232803.1	2096.38	1.99929	0.241976	8.26235	1.42831e-16	1.5772e-15
ENSG00000140543.12	604.52	0.739878	0.0895488	8.26229	1.42902e-16	1.5772e-15
ENSG00000162227.6	1054.81	0.750519	0.090841	8.2619	1.43374e-16	1.58159e-15
ENSG00000143570.16	10660.6	0.653206	0.0790717	8.26093	1.44536e-16	1.59359e-15
ENSG00000104142.9	5904.16	0.929651	0.112541	8.26057	1.44973e-16	1.59757e-15
ENSG00000184574.8	363.108	-1.22454	0.148248	-8.26007	1.45586e-16	1.60349e-15
ENSG00000163866.8	2334.13	0.505027	0.0611456	8.25942	1.46383e-16	1.61143e-15
ENSG00000139182.12	2510.65	-1.19839	0.145114	-8.2583	1.47762e-16	1.62576e-15
ENSG00000130584.9	470.298	-0.85713	0.10386	-8.25277	1.54763e-16	1.70191e-15
ENSG00000089486.15	4230.75	1.03346	0.125233	8.25232	1.55355e-16	1.70753e-15
ENSG00000173065.12	3883.17	0.770405	0.0933627	8.25174	1.56105e-16	1.71489e-15
ENSG00000136908.16	3533.24	0.861059	0.104357	8.25105	1.57005e-16	1.72389e-15
ENSG00000106823.11	189.464	-1.49927	0.181726	-8.25018	1.5815e-16	1.73556e-15
ENSG00000160285.13	5158.61	0.980538	0.11892	8.24534	1.64696e-16	1.80646e-15
ENSG00000253701.2	23.7493	-2.53134	0.307088	-8.24305	1.67882e-16	1.84045e-15
ENSG00000241644.2	204.664	-1.65065	0.200276	-8.24187	1.69536e-16	1.85761e-15
ENSG00000159403.14	11790.2	-1.2297	0.149225	-8.2406	1.71343e-16	1.87645e-15
ENSG00000135148.10	2863.61	-0.612591	0.0743391	-8.24049	1.7151e-16	1.87731e-15
ENSG00000125166.11	6937.19	0.659936	0.0801135	8.23751	1.75833e-16	1.92364e-15
ENSG00000158987.18	524.046	-0.820839	0.0996531	-8.23697	1.76629e-16	1.93134e-15
ENSG00000103479.13	2496.68	-0.893167	0.10849	-8.23271	1.83017e-16	2.00017e-15
ENSG00000171766.14	1181.73	-1.52365	0.18508	-8.23237	1.83546e-16	2.00491e-15
ENSG00000269981.1	10.7298	-1.63088	0.198225	-8.22743	1.91272e-16	2.08822e-15
ENSG00000156510.12	289.861	-1.91053	0.232221	-8.2272	1.91643e-16	2.0912e-15
ENSG00000109790.15	1155.06	-0.780623	0.0948893	-8.22667	1.92484e-16	2.0993e-15
ENSG00000119778.13	520.891	-0.72459	0.0880829	-8.22623	1.93191e-16	2.10592e-15
ENSG00000261295.1	24.3394	-1.99531	0.242577	-8.22549	1.94391e-16	2.11791e-15
ENSG00000100104.11	1673.31	0.75521	0.0918217	8.22475	1.95595e-16	2.12993e-15
ENSG00000166446.13	389.79	-1.2354	0.150211	-8.2244	1.96167e-16	2.13506e-15
ENSG00000126804.12	1251.98	-0.808451	0.0983139	-8.22316	1.98214e-16	2.15624e-15
ENSG00000105135.14	10074.9	1.23788	0.150567	8.22144	2.01072e-16	2.1862e-15
ENSG00000160284.13	1005.33	1.27598	0.155219	8.22049	2.02677e-16	2.20253e-15
ENSG00000006831.9	8298.07	0.592044	0.0720235	8.22014	2.03264e-16	2.20777e-15
ENSG00000241666.2	14.4713	-2.01637	0.245329	-8.21907	2.05087e-16	2.22643e-15
ENSG00000147383.9	1733.15	0.704026	0.0856669	8.21818	2.06618e-16	2.24191e-15
ENSG00000161798.6	85.7383	2.62522	0.319486	8.21702	2.08616e-16	2.26243e-15
ENSG00000196642.14	8831.92	0.879839	0.107078	8.21684	2.08929e-16	2.26466e-15
ENSG00000032219.17	773.309	-0.93557	0.11387	-8.21615	2.10146e-16	2.27669e-15
ENSG00000198746.11	1243.12	0.578817	0.0704606	8.21476	2.1258e-16	2.30189e-15
ENSG00000233999.3	36.9403	-2.36378	0.287885	-8.21086	2.19602e-16	2.3767e-15
ENSG00000204642.12	8613.24	-1.16066	0.141359	-8.21072	2.19868e-16	2.37837e-15
ENSG00000179630.9	492.244	-0.882304	0.107459	-8.21062	2.20058e-16	2.3792e-15
ENSG00000065413.15	1859.87	-0.892652	0.108745	-8.20866	2.23676e-16	2.41709e-15
ENSG00000124571.16	5433.71	0.631025	0.0768751	8.20845	2.24063e-16	2.42004e-15
ENSG00000126883.15	5895.63	0.693483	0.0844907	8.20781	2.25265e-16	2.43179e-15
ENSG00000140365.14	5731.45	0.825479	0.100595	8.20599	2.28689e-16	2.46749e-15
ENSG00000223704.1	14.1138	-1.8658	0.2274	-8.20492	2.30748e-16	2.48843e-15
ENSG00000226197.2	19.5418	-1.85103	0.225607	-8.20467	2.31232e-16	2.49239e-15
ENSG00000172301.9	2593.02	0.683709	0.0833531	8.20256	2.35319e-16	2.53516e-15
ENSG00000235169.6	251.276	1.67953	0.204793	8.20111	2.38171e-16	2.56458e-15
ENSG00000167850.3	164.873	-1.4295	0.174343	-8.19938	2.4163e-16	2.6005e-15
ENSG00000197405.6	685.999	-1.35714	0.16552	-8.1992	2.41993e-16	2.60308e-15
ENSG00000177239.13	6007.16	0.766744	0.0935468	8.19637	2.47762e-16	2.66379e-15
ENSG00000159259.7	1390.18	0.820335	0.100098	8.19533	2.49915e-16	2.68557e-15
ENSG00000106178.5	36.3948	-2.19348	0.267659	-8.19503	2.50536e-16	2.69088e-15
ENSG00000065534.17	2693.09	-1.21412	0.14817	-8.19414	2.52395e-16	2.70947e-15
ENSG00000112309.9	18.2376	-1.33572	0.163021	-8.19352	2.53693e-16	2.72203e-15
ENSG00000083223.16	1198.72	-0.795737	0.0971329	-8.19224	2.56401e-16	2.7497e-15
ENSG00000162618.11	571.52	-1.20737	0.147414	-8.19032	2.60524e-16	2.79249e-15
ENSG00000108784.8	4912.8	0.949676	0.115995	8.18724	2.67275e-16	2.86341e-15
ENSG00000223350.2	305.005	-3.04211	0.371725	-8.18377	2.75089e-16	2.94563e-15
ENSG00000160753.14	2988.03	1.06057	0.129657	8.17982	2.84259e-16	3.04229e-15
ENSG00000182566.11	48.9896	-2.32008	0.283698	-8.178	2.88583e-16	3.08701e-15
ENSG00000137198.8	8441.83	1.65275	0.20212	8.17707	2.90826e-16	3.10944e-15
ENSG00000076248.9	2616.43	0.608873	0.0744811	8.17486	2.96205e-16	3.16435e-15
ENSG00000157911.8	1709.29	0.744125	0.0910263	8.17484	2.96261e-16	3.16435e-15
ENSG00000105613.8	249.644	1.67	0.204317	8.17359	2.99355e-16	3.19578e-15
ENSG00000237036.4	110.113	-1.26127	0.154337	-8.17215	3.02931e-16	3.23233e-15
ENSG00000253930.1	19.6792	-1.53093	0.187354	-8.17131	3.0507e-16	3.25352e-15
ENSG00000189227.5	421.847	0.624393	0.0764304	8.16944	3.09823e-16	3.30255e-15
ENSG00000137106.16	4691.71	0.630594	0.0771911	8.16926	3.10276e-16	3.30571e-15
ENSG00000073849.13	6223.49	-1.13326	0.138726	-8.1691	3.10708e-16	3.30865e-15
ENSG00000128185.8	3743.09	0.997632	0.122136	8.16822	3.12963e-16	3.33099e-15
ENSG00000270012.1	63.8862	-1.02295	0.125239	-8.16796	3.13644e-16	3.33656e-15
ENSG00000185883.9	5957.28	0.978384	0.119787	8.16772	3.14278e-16	3.34163e-15
ENSG00000108671.8	6337.13	0.453621	0.0555538	8.16545	3.20251e-16	3.40343e-15
ENSG00000215014.4	165.756	1.65969	0.203316	8.16312	3.26485e-16	3.46794e-15
ENSG00000095370.18	1143.55	-1.09114	0.133676	-8.16254	3.28046e-16	3.48278e-15
ENSG00000143319.15	3202.6	0.659654	0.0808772	8.15625	3.45586e-16	3.66716e-15
ENSG00000130204.11	5114.34	0.749681	0.0919202	8.15578	3.46941e-16	3.67969e-15
[truncated: 19,193 more rows]
