# Supplementary material for: Epigenomic and genomic analysis of transcriptome modulation in skin cutaneous melanoma
Source: Aging (Albany NY). 2020 Jul 7;12(13):12703–25. doi: 10.18632/aging.103115 (PMC7377867; doi:10.18632/aging.103115)
Supplement: Supplementary Table 10 [file aging-12-103115-s004..xlsx]

## Sheet: S10_Table
Supplementary Table 10. Clinical characteristics of GSE65904 dataset.
Accession	A2_Event	A1_OS	NewEvent	NewEventTime	Tissue	Gender	Age	Stage
GSM1608593	0	1714	0	1714	Lymph node	Male	55	Regional
GSM1608594	1	353	NA	NA	Lymph node	Female	39	Regional
GSM1608595	0	2127	0	2127	Cutaneous	Female	67	Primary
GSM1608596	0	1442	0	1442	Lymph node	Male	56	NA
GSM1608597	1	66	NA	NA	Visceral	Male	46	General
GSM1608598	0	2631	0	2631	Lymph node	Female	36	Regional
GSM1608599	0	2427	1	292	Lymph node	Male	73	Regional
GSM1608600	0	1310	0	1310	Cutaneous	Male	59	Primary
GSM1608601	0	817	0	817	Lymph node	Male	50	Regional
GSM1608602	1	1401	1	1401	Lymph node	Female	77	Regional
GSM1608603	0	101	0	101	Cutaneous	Female	88	Primary
GSM1608604	1	3021	1	2368	Lymph node	Male	47	Regional
GSM1608605	1	643	1	502	Subcutaneous	Male	65	In-transit
GSM1608606	1	1344	1	792	Lymph node	Male	44	Regional
GSM1608607	0	1101	0	1101	Lymph node	Male	33	Regional
GSM1608608	0	75	0	75	Subcutaneous	Female	65	In-transit
GSM1608609	1	77	NA	NA	Lymph node	Male	88	Regional
GSM1608610	1	1485	1	1099	NA	Male	50	Regional
GSM1608611	0	93	1	65	Lymph node	Male	85	Regional
GSM1608612	1	849	1	370	Lymph node	Male	72	Regional
GSM1608613	0	171	0	171	Subcutaneous	Female	79	Local
GSM1608614	1	195	NA	NA	Lymph node	Female	55	Regional
GSM1608615	0	1266	0	1266	Subcutaneous	Female	61	In-transit
GSM1608616	0	6343	0	6343	Lymph node	Male	68	Regional
GSM1608617	0	820	0	820	Lymph node	Male	56	Regional
GSM1608618	NA	NA	NA	NA	NA	Female	46	NA
GSM1608619	0	189	NA	NA	Lymph node	Male	65	Regional
GSM1608620	1	453	1	372	Lymph node	Male	65	Regional
GSM1608621	0	1220	0	1220	Subcutaneous	Male	50	In-transit
GSM1608622	0	559	0	559	NA	Female	82	Regional
GSM1608623	1	834	1	374	Lymph node	Male	74	Regional
GSM1608624	0	1030	NA	NA	Lymph node	Male	61	Regional
GSM1608625	0	3206	0	3206	Lymph node	Male	51	Regional
GSM1608626	1	1199	1	875	Lymph node	Male	61	Regional
GSM1608627	0	5212	1	293	Subcutaneous	Female	34	Local
GSM1608628	1	592	1	387	Cutaneous	Male	51	Local
GSM1608629	0	50	NA	NA	Lymph node	Male	71	Regional
GSM1608630	0	1187	1	655	Lymph node	Male	73	Regional
GSM1608631	1	419	NA	NA	Subcutaneous	Female	76	In-transit
GSM1608632	1	208	NA	NA	Subcutaneous	Male	88	General
GSM1608633	1	2481	NA	NA	Subcutaneous	Female	64	General
GSM1608634	0	267	0	267	Lymph node	Male	78	Regional
GSM1608635	1	435	1	162	NA	Male	74	NA
GSM1608636	1	742	NA	NA	Subcutaneous	Male	56	Regional
GSM1608637	1	97	1	97	Subcutaneous	Male	70	In-transit
GSM1608638	0	451	0	451	Lymph node	Male	54	NA
GSM1608639	0	3779	0	3779	NA	Female	NA	NA
GSM1608640	1	194	NA	NA	Visceral	Male	62	General
GSM1608641	0	2574	1	229	Lymph node	Male	55	Regional
GSM1608642	0	1260	0	1260	Lymph node	Male	60	Regional
GSM1608643	0	634	1	561	NA	Female	58	Regional
GSM1608644	0	22	0	22	Cutaneous	Male	78	Primary
GSM1608645	1	591	1	421	Lymph node	Male	74	Regional
GSM1608646	0	105	0	105	NA	Female	86	Regional
GSM1608647	0	1455	NA	NA	Lymph node	Male	65	Regional
GSM1608648	1	1404	1	727	Lymph node	Male	43	Regional
GSM1608649	1	378	NA	NA	Subcutaneous	Female	35	General
GSM1608650	1	2530	1	2312	Lymph node	Male	39	Regional
GSM1608651	1	550	1	6	Subcutaneous	Male	52	In-transit
GSM1608652	0	3185	0	3185	Lymph node	Male	59	Regional
GSM1608653	1	310	1	153	Lymph node	Male	77	Regional
GSM1608654	0	282	1	207	Cutaneous	Female	71	Primary
GSM1608655	0	3315	0	3315	Lymph node	Female	54	Regional
GSM1608656	1	275	NA	NA	Lymph node	Male	61	Regional
GSM1608657	0	3582	0	3582	Lymph node	Male	70	Regional
GSM1608658	0	484	1	79	Lymph node	Male	73	Regional
GSM1608659	0	731	0	731	Cutaneous	Female	77	Primary
GSM1608660	0	875	0	875	Lymph node	Female	81	Regional
GSM1608661	1	12	NA	NA	Subcutaneous	Male	58	General
GSM1608662	1	642	1	280	Lymph node	Male	53	Regional
GSM1608663	0	461	1	331	Lymph node	Female	74	Regional
GSM1608664	0	1406	0	1406	Lymph node	Female	71	Regional
GSM1608665	1	1329	1	1143	Lymph node	Male	39	Regional
GSM1608666	0	1172	0	1172	Lymph node	Female	46	Regional
GSM1608667	0	164	0	164	Subcutaneous	Female	43	Local
GSM1608668	1	365	1	312	Lymph node	Male	48	Regional
GSM1608669	0	2584	1	282	Subcutaneous	Male	52	NA
GSM1608670	0	2619	NA	NA	Visceral	Male	63	General
GSM1608671	1	399	1	21	Lymph node	Male	71	Regional
GSM1608672	0	5530	0	5530	Lymph node	Female	55	Regional
GSM1608673	0	6097	0	6097	Cutaneous	Male	75	Primary
GSM1608674	0	1312	0	1312	Cutaneous	Male	56	Local
GSM1608675	1	120	1	58	NA	Female	59	Regional
GSM1608676	0	340	1	249	Subcutaneous	Female	65	Regional
GSM1608677	1	429	1	338	Lymph node	Female	34	Regional
GSM1608678	0	6453	0	6453	Cutaneous	Female	80	Primary
GSM1608679	0	1313	0	1313	Cutaneous	Male	59	Primary
GSM1608680	1	279	NA	NA	NA	Male	65	Regional
GSM1608681	0	1112	0	1112	Lymph node	Female	75	Regional
GSM1608682	0	111	NA	NA	Visceral	Female	56	General
GSM1608683	1	195	NA	NA	NA	Female	63	Regional
GSM1608684	0	734	0	734	Lymph node	Male	81	Regional
GSM1608685	1	542	NA	NA	Lymph node	Male	57	Regional
GSM1608686	1	82	NA	NA	Subcutaneous	Male	22	General
GSM1608687	1	303	1	185	Subcutaneous	Male	76	Local
GSM1608688	1	91	NA	NA	Lymph node	Female	76	Regional
GSM1608689	0	51	1	13	Cutaneous	Male	78	Primary
GSM1608690	1	455	1	338	Subcutaneous	Male	77	In-transit
GSM1608691	0	71	NA	NA	Subcutaneous	Male	71	General
GSM1608692	0	424	0	424	Lymph node	Female	71	Regional
GSM1608693	1	574	1	574	Lymph node	Male	83	Regional
GSM1608694	0	1027	1	161	Lymph node	Female	68	Regional
GSM1608695	0	5632	0	5632	NA	Male	66	Regional
GSM1608696	0	1429	0	1429	Lymph node	Female	79	Regional
GSM1608697	1	303	1	145	Lymph node	Female	62	Regional
GSM1608698	0	333	0	333	Lymph node	Male	65	Regional
GSM1608699	1	82	NA	NA	Visceral	Male	73	General
GSM1608700	1	493	1	379	Lymph node	Male	84	NA
GSM1608701	0	170	0	170	Cutaneous	Male	77	Local
GSM1608702	0	358	1	295	Lymph node	Male	58	Regional
GSM1608703	0	2239	0	2239	Lymph node	Female	67	Regional
GSM1608704	1	126	NA	NA	Lymph node	Female	52	Regional
GSM1608705	0	2319	0	2319	NA	Female	64	Regional
GSM1608706	1	707	1	40	Cutaneous	Male	61	Primary
GSM1608707	1	1325	1	229	Lymph node	Male	63	Regional
GSM1608708	1	137	1	69	Lymph node	Male	62	Regional
GSM1608709	1	1432	1	897	Lymph node	Male	71	Regional
GSM1608710	1	6	NA	NA	Visceral	Female	66	General
GSM1608711	0	158	NA	NA	Visceral	Female	49	General
GSM1608712	1	386	NA	NA	Lymph node	Female	81	Regional
GSM1608713	0	652	1	469	Lymph node	Female	47	Regional
GSM1608714	0	5005	0	5005	Lymph node	Female	25	Regional
GSM1608715	0	186	0	186	Lymph node	Female	74	Regional
GSM1608716	0	89	1	73	Subcutaneous	Male	86	In-transit
GSM1608717	1	442	1	405	Lymph node	Female	67	Regional
GSM1608718	1	650	1	160	Lymph node	Male	59	Regional
GSM1608719	0	307	0	307	Lymph node	Male	60	Regional
GSM1608720	0	4450	1	4450	Lymph node	Male	81	Regional
GSM1608721	1	188	NA	NA	Lymph node	Female	59	Regional
GSM1608722	1	1222	1	727	Subcutaneous	Male	65	In-transit
GSM1608723	0	1231	1	288	Lymph node	Male	77	Regional
GSM1608724	1	623	1	20	Lymph node	Male	67	Regional
GSM1608725	1	197	NA	NA	Subcutaneous	Female	84	General
GSM1608726	0	318	NA	NA	Lymph node	Male	63	Regional
GSM1608727	1	380	1	235	Lymph node	Male	33	Regional
GSM1608728	0	1912	0	1912	Lymph node	Male	32	Regional
GSM1608729	0	420	1	354	Cutaneous	Male	82	Primary
GSM1608730	1	526	NA	NA	Other	Female	44	Local
GSM1608731	0	212	NA	NA	Lymph node	Female	71	Regional
GSM1608732	0	880	1	461	Lymph node	Female	65	Regional
GSM1608733	1	375	NA	NA	Subcutaneous	Male	31	General
GSM1608734	1	262	1	116	Lymph node	Male	60	Regional
GSM1608735	1	56	1	56	Lymph node	Male	70	Regional
GSM1608736	1	356	NA	NA	Subcutaneous	Female	45	In-transit
GSM1608737	1	476	1	476	NA	Male	60	Regional
GSM1608738	NA	NA	NA	NA	Cutaneous	Female	NA	Primary
GSM1608739	1	638	NA	NA	Lymph node	Male	89	Regional
GSM1608740	1	435	NA	NA	Lymph node	Female	63	In-transit
GSM1608741	0	43	0	43	Cutaneous	Male	64	Primary
GSM1608742	1	42	NA	NA	Lymph node	Male	73	Regional
GSM1608743	1	337	NA	NA	Subcutaneous	Male	71	In-transit
GSM1608744	1	392	NA	NA	Subcutaneous	Male	68	Regional
GSM1608745	1	593	NA	NA	Lymph node	Male	63	General
GSM1608746	1	957	1	110	Lymph node	Female	48	Regional
GSM1608747	0	678	0	678	Lymph node	Female	77	Regional
GSM1608748	0	324	0	324	Cutaneous	Female	87	Primary
GSM1608749	1	634	NA	NA	Visceral	Female	55	General
GSM1608750	0	647	0	647	Lymph node	Female	29	Regional
GSM1608751	1	732	1	235	Lymph node	Female	67	Regional
GSM1608752	0	252	0	252	Cutaneous	Female	91	Local
GSM1608753	1	411	1	357	Lymph node	Male	58	Regional
GSM1608754	1	336	1	155	Lymph node	Male	72	Regional
GSM1608755	1	132	1	114	Lymph node	Male	62	Regional
GSM1608756	0	861	0	861	Lymph node	Female	70	Regional
GSM1608757	0	1779	0	1779	Lymph node	Female	62	Regional
GSM1608758	1	1958	1	1897	Subcutaneous	Male	70	Local
GSM1608759	1	93	NA	NA	Lymph node	Male	70	Regional
GSM1608760	1	72	1	18	NA	Female	69	NA
GSM1608761	1	461	1	177	Lymph node	Female	47	Regional
GSM1608762	0	456	NA	NA	Visceral	Male	69	General
GSM1608763	0	2175	1	811	Lymph node	Male	41	Regional
GSM1608764	0	2800	0	2800	Lymph node	Male	55	Regional
GSM1608765	1	66	NA	NA	Lymph node	Male	52	Regional
GSM1608766	0	307	NA	NA	Cutaneous	Female	67	General
GSM1608767	1	44	NA	NA	Lymph node	Female	68	Regional
GSM1608768	0	1035	0	1035	Lymph node	Female	74	Regional
GSM1608769	0	194	0	194	Lymph node	Female	58	Regional
GSM1608770	0	3363	0	3363	Lymph node	Female	57	Regional
GSM1608771	1	163	1	15	Lymph node	Male	72	Regional
GSM1608772	0	523	1	222	Lymph node	Male	61	Regional
GSM1608773	0	511	0	511	Subcutaneous	Male	53	Local
GSM1608774	1	411	NA	NA	Lymph node	Male	73	Regional
GSM1608775	1	85	NA	NA	Lymph node	Male	55	Regional
GSM1608776	NA	NA	NA	NA	NA	NA	NA	NA
GSM1608777	1	682	1	394	Lymph node	Female	66	Regional
GSM1608778	1	629	1	344	Lymph node	Male	64	Regional
GSM1608779	1	165	NA	NA	Lymph node	Male	65	Regional
GSM1608780	1	189	NA	NA	NA	Female	52	General
GSM1608781	0	66	NA	NA	Lymph node	Male	40	Regional
GSM1608782	0	1479	0	1479	Lymph node	Female	30	Regional
GSM1608783	1	64	NA	NA	Subcutaneous	Female	34	General
GSM1608784	0	174	0	174	Lymph node	Female	54	Regional
GSM1608785	1	1182	1	498	Lymph node	Male	66	Regional
GSM1608786	1	1253	1	1208	Lymph node	Female	79	Regional
GSM1608787	0	685	0	685	Cutaneous	Female	82	Primary
GSM1608788	1	491	NA	NA	Visceral	Female	48	General
GSM1608789	1	736	1	594	Lymph node	Male	51	Regional
GSM1608790	1	1097	1	532	Lymph node	Male	77	Regional
GSM1608791	0	789	NA	NA	Lymph node	Male	72	Regional
GSM1608792	0	519	1	336	Lymph node	Male	75	Regional
GSM1608793	0	1784	0	1784	Lymph node	Male	71	Regional
GSM1608794	0	566	1	147	Lymph node	Female	64	Regional
GSM1608795	0	1379	0	1379	Lymph node	Female	73	Regional
GSM1608796	0	851	NA	NA	Subcutaneous	Male	85	General
GSM1608797	NA	NA	NA	NA	NA	Female	NA	NA
GSM1608798	0	308	1	207	Subcutaneous	Male	36	In-transit
GSM1608799	0	2890	0	2890	Lymph node	Female	66	Regional
GSM1608800	1	638	NA	NA	Cutaneous	Male	37	Regional
GSM1608801	1	295	1	135	Lymph node	Male	67	In-transit
GSM1608802	1	154	NA	NA	Lymph node	Female	38	Regional
GSM1608803	1	194	1	66	Lymph node	Female	40	Regional
GSM1608804	1	145	NA	NA	NA	Female	42	Regional
GSM1608805	0	1194	1	140	Lymph node	Female	72	Regional
GSM1608806	0	1491	0	1491	Lymph node	Male	53	Regional
