# Supplementary material for: Epigenomic and genomic analysis of transcriptome modulation in skin cutaneous melanoma
Source: Aging (Albany NY). 2020 Jul 7;12(13):12703–25. doi: 10.18632/aging.103115 (PMC7377867; doi:10.18632/aging.103115)
Supplement: Supplementary Table 11 [file aging-12-103115-s005..xlsx]

## Sheet: S11_Table
gName	KMsurv	ValiP
GBP5	4.72438e-08	0.00366462
FCGR2A	3.03285e-07	0.472448
BST2	3.96232e-07	0.917727
HIVEP3	7.68599e-07	0.702778
CD8A	7.89619e-07	0.000789934
SAMHD1	1.19571e-06	0.00757981
IL15RA	1.29454e-06	0.619845
KIAA0040	1.69974e-06	0.00180966
ARHGAP25	1.96146e-06	0.0512183
PRF1	2.14768e-06	0.00994527
SP100	2.16968e-06	0.432323
TNFSF13B	3.14536e-06	0.0224842
ARHGAP9	3.32813e-06	0.00988302
RARRES3	3.50045e-06	0.00361268
SP140L	5.9807e-06	0.318178
N4BP2L1	6.75958e-06	0.00912886
PTPRC	6.90841e-06	0.000366582
ARHGAP12	6.99912e-06	0.423085
MICALL1	7.59865e-06	0.151146
IL10RA	1.04502e-05	0.0633772
SLC7A7	1.12889e-05	0.0135084
RAP1A	1.34171e-05	0.290263
S1PR4	1.36278e-05	0.0494546
ITGAL	1.47455e-05	0.0193621
CALCOCO2	1.87067e-05	0.0158249
SPOCK2	1.90587e-05	0.00967617
SLAMF6	2.21e-05	0.00657835
FLAD1	2.37435e-05	0.0573482
TSPAN9	2.38458e-05	0.327629
TNFRSF1B	3.08916e-05	0.285203
CD7	3.09263e-05	0.0018184
ZNF749	3.47229e-05	0.387103
CTSS	3.65146e-05	0.0118586
ITGB2	3.92308e-05	0.0394229
TRIM5	4.01314e-05	0.664027
AIM2	4.15873e-05	0.00382873
LAIR1	4.33078e-05	0.043632
MCOLN2	7.05203e-05	0.168984
VAV1	7.64689e-05	0.0219872
CBX7	8.00804e-05	0.241583
IL18BP	8.1455e-05	0.0745382
APIP	8.44444e-05	0.0238086
RCSD1	8.67461e-05	0.0329317
SLAMF8	8.99542e-05	0.128455
BIN2	9.26939e-05	0.0243517
MS4A6A	9.5571e-05	0.00520326
PSEN2	0.000100309	0.261287
PQLC3	0.000126436	0.0315182
CD48	0.000127973	0.0112344
CD40	0.000130505	0.0112482
PCGF5	0.000144095	0.0325777
CYTH4	0.000148974	0.0231079
PARVG	0.000166912	0.140367
CSNK1E	0.000169349	0.870192
SLAMF7	0.000177834	0.0199465
EFTUD2	0.000186666	0.636976
IRF8	0.000195641	0.0154872
CD5	0.000229985	0.00192338
MS4A4A	0.000243134	0.0595053
ALOX5	0.000243675	0.113731
PCED1B	0.000251826	0.00165242
BAIAP2L2	0.000254345	0.289059
ARRB2	0.000273975	0.130186
PIK3AP1	0.000280256	0.276439
GBP3	0.000306552	0.796256
LRRC8C	0.000310851	0.0711343
SPI1	0.000327946	0.0156501
ABCC2	0.000332062	0.419632
CDH3	0.000383423	0.547509
GSTP1	0.000399406	0.72363
MGAT5B	0.000420036	0.788685
SPOP	0.000420121	0.71357
BBS2	0.000447615	0.0985519
UBAP2L	0.000456122	0.191639
JAG2	0.000511852	0.246686
BAIAP2	0.000520693	0.327007
SERPING1	0.000526348	0.278024
ARHGDIB	0.000631981	0.00722444
SP110	0.000640292	0.720952
NFAM1	0.000674211	0.445684
ITGAM	0.000693999	0.0127468
INPP5D	0.000713343	0.0343895
CS	0.000770701	0.757962
CD3E	0.000791147	0.00872141
MPEG1	0.000796952	0.0783842
ADRBK1	0.000838925	NA
ARHGAP30	0.000905201	0.0495255
ZEB1	0.000916579	0.360438
UBE2O	0.000936116	0.0587294
SLC43A2	0.00098348	0.0939173
CAMK2N1	0.000983664	0.412133
RFX5	0.00101277	0.970493
FLI1	0.00104474	0.650068
CD6	0.00108114	0.0298931
RNF213	0.00127458	0.285745
TBC1D16	0.0013328	0.00711739
ALOX5AP	0.00141936	0.122497
ULK1	0.00144453	0.0689423
PTPRE	0.00149589	0.0145048
ATP1B1	0.00162307	0.807099
NFKBIA	0.00181566	0.0351008
LGMN	0.00182564	0.351298
SMARCA4	0.00188589	0.0112271
CCDC88B	0.0019074	0.0139594
SYDE1	0.00191665	0.0408654
HEXDC	0.00212796	NA
FERMT3	0.00229603	1.74864e-05
NLRX1	0.00230777	0.17668
PPM1H	0.00237629	0.00157302
PPP2R5C	0.00252789	0.135607
C19orf38	0.00272302	0.106178
MIER1	0.00296639	0.597651
STAMBPL1	0.0030104	0.400867
USP35	0.00309502	0.831689
SLC7A1	0.00323682	0.0772604
RABGAP1L	0.00336949	0.010096
KCNAB2	0.00337285	0.953853
CREG1	0.00379159	0.00886063
IPO9	0.00384618	0.301606
WIZ	0.00391312	0.277971
EPN1	0.00402205	0.432222
TRPM1	0.00408068	0.0483879
PWWP2B	0.0042576	0.515502
HNRNPUL1	0.00428788	0.8999
ITPKB	0.00443167	0.137901
Supplementary Table 11. Differential genes related to prognosis between iC1 and iC3 subtypes. (post GSE65904 dataset verification)
C19orf47	0.00450936	0.901734
SFMBT2	0.0045899	0.611724
PSMD9	0.00459269	0.20113
ZDHHC13	0.00466755	0.664645
ZNF438	0.0047149	0.105494
YPEL5	0.00489967	0.0958488
TUBA1C	0.00520363	0.267214
SCARF1	0.00624738	0.0128225
BCL7C	0.00629083	0.0949868
MLXIP	0.00629444	0.041892
TPCN2	0.00647898	0.374945
ARPC5	0.00657205	0.291768
C14orf159	0.00666099	NA
LIG1	0.00682455	0.367382
FARP1	0.00734441	0.000642005
VANGL2	0.00759071	0.0872974
CARM1	0.00783607	0.0647552
FAM174B	0.00875308	0.713209
GDPD5	0.00892304	0.72106
GRB2	0.00899712	0.19365
MYO1D	0.00918952	0.345571
MCF2L	0.0103466	0.0854187
GAB2	0.010456	0.109293
SLC3A2	0.0112064	0.720071
LPIN2	0.0112822	0.0926517
PRCC	0.0124597	0.00662454
STK32C	0.0128454	0.14249
CTSC	0.0130964	0.0397676
DUSP14	0.0134157	0.0535026
FRA10AC1	0.0136207	0.577092
FBRSL1	0.0137664	0.0697613
RASSF5	0.0138186	0.000719287
TMEM220	0.0143812	0.0283109
PARVA	0.0151228	0.232728
KIF1C	0.0154884	0.0514967
ITGB3	0.0167221	0.49687
CDC42EP1	0.0167609	0.548273
TYR	0.0170448	0.883827
PLCB2	0.0173547	0.0421802
BRD4	0.017698	0.269319
ANAPC16	0.0184881	0.00835611
NCLN	0.0193631	0.0052216
ITSN2	0.019396	0.396222
TTLL12	0.0196693	0.0661424
AP2A1	0.0199923	0.0519757
PTP4A2	0.0203199	0.730733
ATP6V0D1	0.020385	0.18342
ATP11A	0.0208865	0.817492
BAHCC1	0.0210034	0.0397262
SH3BP4	0.0210523	0.419138
HDAC4	0.0210944	0.0466389
SORCS1	0.021842	0.537923
SLC25A39	0.0228987	0.167057
GTF3C2	0.0233514	0.0172751
UGP2	0.0238681	0.461522
TROAP	0.0249126	0.0147396
SLC7A5	0.0285477	0.090536
TECR	0.0343458	0.910537
GRK5	0.0366099	0.873269
RAB3A	0.0370178	0.429144
BACE2	0.0379915	0.530908
PTGFRN	0.0400962	0.152653
MUM1	0.0404967	0.0381133
TUBB6	0.0434811	0.0255284
ABR	0.0437103	0.729149
ZCCHC24	0.0468523	0.861785
AKAP10	0.0505598	0.148773
STX16	0.0505784	0.189662
CCDC8	0.0559817	0.088504
CCT3	0.0582712	0.101782
BANP	0.0609092	0.580307
SYNGR1	0.0703602	0.283932
TECPR2	0.0716603	0.509219
RAB38	0.0740618	0.235496
PI4KB	0.0748797	0.025044
MYH10	0.0772262	0.0154607
MBP	0.0782467	0.0628041
KDM4B	0.0825908	0.0276428
PEMT	0.0910005	0.613971
CYTH1	0.095864	0.285211
AHCY	0.0960946	0.765485
TMEM79	0.105601	0.665254
FAM83G	0.105904	0.763206
TMEM184B	0.110007	0.168306
FAM65A	0.135805	NA
PELP1	0.140925	0.303521
PRRX1	0.154397	0.432711
SLC38A7	0.182045	0.0238543
TMEM104	0.202182	0.231761
KDM5B	0.263486	0.000182016
RHOD	0.278276	0.879476
RPS6KA4	0.294647	0.727549
SPATA20	0.33039	0.986478
EVL	0.345733	0.148008
POLR3H	0.383004	0.395713
SLC19A2	0.447602	0.994972
