# Supplementary material for: Epigenomic and genomic analysis of transcriptome modulation in skin cutaneous melanoma
Source: Aging (Albany NY). 2020 Jul 7;12(13):12703–25. doi: 10.18632/aging.103115 (PMC7377867; doi:10.18632/aging.103115)
Supplement: Supplementary Table 12 [file aging-12-103115-s009..xlsx]

## Sheet: S12_Table
Supplementary Table 12. Differential genes between iC1 and iC3 subtypes included in SNV analysis.
gName	FisherP	Mut_iC1	Nor_iC1	Mut_iC3	Nor_iC3	padj
FAM135B	1.28473e-05	11	88	42	71	0.245204
CHEK2P2	2.74309e-05	0	99	16	97	0.523519
CDC20B	0.000113946	0	99	14	99	1
KMT2C	0.000161086	2	97	20	93	1
OR4A47	0.000468135	0	99	12	101	1
ZNF733P	0.000945627	0	99	11	102	1
VSTM2A	0.000945627	0	99	11	102	1
SLC9A4	0.000985654	5	94	23	90	1
HBG2	0.00175613	1	98	13	100	1
SEL1L2	0.00175613	1	98	13	100	1
ABCC10	0.00175613	1	98	13	100	1
FLNA	0.00175613	1	98	13	100	1
NCOA3	0.00175613	1	98	13	100	1
ARHGAP15	0.00190651	0	99	10	103	1
PRRC2B	0.00190651	0	99	10	103	1
CD109	0.00190651	0	99	10	103	1
KLHL38	0.00190651	0	99	10	103	1
DUSP22	0.00190651	0	99	10	103	1
BANK1	0.00190651	0	99	10	103	1
ANLN	0.00193369	8	91	0	113	1
SPTBN4	0.00207684	3	96	18	95	1
CDH7	0.00213209	2	97	16	97	1
ADGRL3	0.00222736	2	97	15	98	1
FHDC1	0.00222736	2	97	15	98	1
BAGE2	0.00222736	2	97	15	98	1
MYO18B	0.0026488	8	91	27	86	1
COL5A3	0.00295136	5	94	21	92	1
FAM90A1	0.00331082	1	98	12	101	1
CYP3A43	0.00331082	1	98	12	101	1
MRC2	0.00331082	1	98	12	101	1
KIT	0.00331082	1	98	12	101	1
NAV3	0.00336947	4	95	19	94	1
KCNK1	0.00383748	0	99	9	104	1
HSP90AA1	0.00383748	0	99	9	104	1
UGT2B27P	0.00383748	0	99	9	104	1
PPP3R2	0.00383748	0	99	9	104	1
FCHO1	0.00383748	0	99	9	104	1
FAIM3	0.00383748	0	99	9	104	1
REG3G	0.00383748	0	99	9	104	1
DPY19L1P1	0.00383748	0	99	9	104	1
DNAH5	0.00398255	38	61	66	47	1
CACNA2D1	0.00401146	2	97	14	99	1
RBM25	0.00430878	7	92	0	113	1
MED12L	0.00501874	5	94	20	93	1
NOS1	0.00549854	9	90	27	86	1
C6	0.00619447	12	87	31	82	1
RP11-335F8.2	0.00619805	1	98	11	102	1
WDR93	0.00619805	1	98	11	102	1
OR2T1	0.00619805	1	98	11	102	1
GJA10	0.00619805	1	98	11	102	1
KLHL14	0.00619805	1	98	11	102	1
GLYATL1	0.00663741	3	96	16	97	1
PLCB1	0.00701628	6	93	21	92	1
KMT2D	0.00701628	6	93	21	92	1
OR2W1	0.00715655	2	97	13	100	1
KIAA1551	0.00715655	2	97	13	100	1
NOTCH1	0.0077135	0	99	8	105	1
NGDN	0.0077135	0	99	8	105	1
DCHS1	0.0077135	0	99	8	105	1
KIF19	0.0077135	0	99	8	105	1
PALM2-AKAP2	0.0077135	0	99	8	105	1
H1FNT	0.0077135	0	99	8	105	1
ADAMTSL4	0.0077135	0	99	8	105	1
ZNF774	0.0077135	0	99	8	105	1
OR52K1	0.0077135	0	99	8	105	1
FGL2	0.0077135	0	99	8	105	1
TUBBP1	0.0077135	0	99	8	105	1
HKDC1	0.0077135	0	99	8	105	1
OPCML	0.0077135	0	99	8	105	1
DAG1	0.0077135	0	99	8	105	1
AL161651.1	0.0077135	0	99	8	105	1
KCNA2	0.0077135	0	99	8	105	1
CCDC172	0.0077135	0	99	8	105	1
C7orf62	0.0077135	0	99	8	105	1
SLC7A14	0.0077135	0	99	8	105	1
SPRY3	0.0077135	0	99	8	105	1
ACSM3	0.0077135	0	99	8	105	1
MYO7B	0.0084277	5	94	19	94	1
PCDHB4	0.0084277	5	94	19	94	1
TPTE	0.0088183	9	90	26	87	1
CNGB3	0.00934407	7	92	22	91	1
FREM1	0.00934407	7	92	22	91	1
STS	0.00954417	6	93	0	113	1
PTPRB	0.00960505	12	87	30	83	1
XIRP2	0.00998551	26	73	49	64	1
ANKRD30A	0.0112147	13	86	31	82	1
OR52A5	0.0115154	1	98	10	103	1
RP11-551L14.1	0.0115154	1	98	10	103	1
SVIL	0.0115154	1	98	10	103	1
PRKDC	0.0115154	1	98	10	103	1
STON1-GTF2A1L	0.0115154	1	98	10	103	1
SEMA5A	0.0115154	1	98	10	103	1
TMEM63C	0.0115154	1	98	10	103	1
AFF1	0.0115154	1	98	10	103	1
OR51E1	0.0115154	1	98	10	103	1
TDRKH	0.0115154	1	98	10	103	1
SEC16B	0.0115154	1	98	10	103	1
ATP1A3	0.0116343	3	96	15	98	1
HS3ST4	0.0116343	3	96	15	98	1
PDGFRA	0.0116343	3	96	15	98	1
ANK1	0.0119782	8	91	23	90	1
ADAMTS20	0.0125901	11	88	28	85	1
C2CD3	0.012639	2	97	12	101	1
MYOM1	0.012639	2	97	12	101	1
RGS12	0.012639	2	97	12	101	1
MYH3	0.012639	2	97	12	101	1
ISX	0.012639	2	97	12	101	1
GPR149	0.012639	2	97	12	101	1
TEP1	0.012639	2	97	12	101	1
FOXD4L4	0.012639	2	97	12	101	1
KRT9	0.012639	2	97	12	101	1
DCAF4L2	0.012639	2	97	12	101	1
PARD3B	0.012639	2	97	12	101	1
POTEH	0.012639	2	97	12	101	1
ZBTB39	0.0134775	8	91	1	112	1
RBBP8NL	0.0134775	8	91	1	112	1
EPPK1	0.0148921	7	92	21	92	1
COL11A2	0.0148921	7	92	21	92	1
ERICH6	0.0154867	0	99	7	106	1
GORAB	0.0154867	0	99	7	106	1
CCDC130	0.0154867	0	99	7	106	1
NPFFR2	0.0154867	0	99	7	106	1
ABCG4	0.0154867	0	99	7	106	1
CDK14	0.0154867	0	99	7	106	1
FNDC3B	0.0154867	0	99	7	106	1
ITGA6	0.0154867	0	99	7	106	1
USP32	0.0154867	0	99	7	106	1
EIF2AK4	0.0154867	0	99	7	106	1
COL6A1	0.0154867	0	99	7	106	1
KHDC3L	0.0154867	0	99	7	106	1
KCNG2	0.0154867	0	99	7	106	1
DRC1	0.0154867	0	99	7	106	1
INPP5J	0.0154867	0	99	7	106	1
SPI1	0.0154867	0	99	7	106	1
KRT16P6	0.0154867	0	99	7	106	1
BCL2L12	0.0154867	0	99	7	106	1
NPAS2	0.0154867	0	99	7	106	1
PLEK	0.0154867	0	99	7	106	1
TBC1D9B	0.0154867	0	99	7	106	1
RHBDD1	0.0154867	0	99	7	106	1
HDAC3	0.0154867	0	99	7	106	1
SPAG5	0.0154867	0	99	7	106	1
LRRC55	0.0154867	0	99	7	106	1
OR14J1	0.0154867	0	99	7	106	1
XAGE5	0.0154867	0	99	7	106	1
ZNF404	0.0154867	0	99	7	106	1
TAOK3	0.0154867	0	99	7	106	1
MVP	0.0154867	0	99	7	106	1
PVRL4	0.0154867	0	99	7	106	1
SCN4A	0.0168647	4	95	16	97	1
LTBP2	0.0168647	4	95	16	97	1
WDFY3	0.0168647	4	95	16	97	1
CENPE	0.0168647	4	95	16	97	1
A1CF	0.0168647	4	95	16	97	1
NLRP11	0.0184623	6	93	19	94	1
CDH23	0.0184623	6	93	19	94	1
MUC2	0.0186795	8	91	22	91	1
ZNF208	0.0186795	8	91	22	91	1
NRXN1	0.0186795	8	91	22	91	1
FCGBP	0.0192672	11	88	27	86	1
SVEP1	0.0192672	11	88	27	86	1
MERTK	0.0200945	3	96	14	99	1
IKZF2	0.0200945	3	96	14	99	1
ZEB1	0.0200945	3	96	14	99	1
ZFP42	0.0206278	12	87	4	109	1
TNXB	0.020734	15	84	33	80	1
PRSS45	0.0210175	5	94	0	113	1
PNPLA5	0.0210175	5	94	0	113	1
RENBP	0.0210175	5	94	0	113	1
CYP2A7P1	0.0210175	5	94	0	113	1
MYO10	0.0210175	5	94	0	113	1
MTA1	0.0210175	5	94	0	113	1
TMC1	0.0212162	1	98	9	104	1
ADAMTS13	0.0212162	1	98	9	104	1
C4B	0.0212162	1	98	9	104	1
ARHGAP39	0.0212162	1	98	9	104	1
NCF2	0.0212162	1	98	9	104	1
OSBPL3	0.0212162	1	98	9	104	1
IL36A	0.0212162	1	98	9	104	1
CLRN1	0.0212162	1	98	9	104	1
SELL	0.0212162	1	98	9	104	1
DDX4	0.0212162	1	98	9	104	1
ZNF658	0.0212162	1	98	9	104	1
MYO6	0.0212162	1	98	9	104	1
EPB41	0.0212162	1	98	9	104	1
CRHR2	0.0212162	1	98	9	104	1
PKP4	0.0212162	1	98	9	104	1
THBS3	0.0212162	1	98	9	104	1
ARHGEF2	0.0212162	1	98	9	104	1
OR1L3	0.0212162	1	98	9	104	1
SP140L	0.0212162	1	98	9	104	1
IGFN1	0.0212162	1	98	9	104	1
AADAC	0.0212162	1	98	9	104	1
C12orf50	0.0212162	1	98	9	104	1
LPA	0.0216988	9	90	24	89	1
THBS2	0.0220778	2	97	11	102	1
HTT	0.0220778	2	97	11	102	1
OR2M5	0.0220778	2	97	11	102	1
ZNF334	0.0220778	2	97	11	102	1
EDIL3	0.0220778	2	97	11	102	1
OR14A16	0.0220778	2	97	11	102	1
COL25A1	0.0220778	2	97	11	102	1
NTNG1	0.0220778	2	97	11	102	1
RANBP2	0.0220778	2	97	11	102	1
CHRM2	0.0220778	2	97	11	102	1
ITPR3	0.0220778	2	97	11	102	1
OR2T2	0.0220778	2	97	11	102	1
MALAT1	0.0228059	5	94	17	96	1
CYP2C9	0.0228059	5	94	17	96	1
LRTM1	0.0228059	5	94	17	96	1
SPANXN5	0.0234092	11	88	3	110	1
MYO5B	0.0234103	7	92	20	93	1
FER1L6	0.0252913	10	89	25	88	1
RGS8	0.0267141	7	92	1	112	1
MMRN2	0.0267141	7	92	1	112	1
TMPRSS9	0.0267141	7	92	1	112	1
POTEF	0.0280247	4	95	15	98	1
PRKG2	0.0280247	4	95	15	98	1
MUSK	0.0280247	4	95	15	98	1
RBP3	0.0293163	6	93	18	95	1
STX1B	0.0310643	0	99	6	107	1
TMEM35	0.0310643	0	99	6	107	1
FGF14	0.0310643	0	99	6	107	1
TMPRSS11D	0.0310643	0	99	6	107	1
NKX2-2	0.0310643	0	99	6	107	1
SYK	0.0310643	0	99	6	107	1
HBB	0.0310643	0	99	6	107	1
PSORS1C1	0.0310643	0	99	6	107	1
IGSF5	0.0310643	0	99	6	107	1
DPRX	0.0310643	0	99	6	107	1
CDK8	0.0310643	0	99	6	107	1
DDR1	0.0310643	0	99	6	107	1
TRDN	0.0310643	0	99	6	107	1
RP11-252A24.2	0.0310643	0	99	6	107	1
MACROD2	0.0310643	0	99	6	107	1
GSE1	0.0310643	0	99	6	107	1
CLCN7	0.0310643	0	99	6	107	1
DPYSL5	0.0310643	0	99	6	107	1
ZNF274	0.0310643	0	99	6	107	1
RALYL	0.0310643	0	99	6	107	1
TOP1MT	0.0310643	0	99	6	107	1
FAM227B	0.0310643	0	99	6	107	1
IKZF4	0.0310643	0	99	6	107	1
OOSP2	0.0310643	0	99	6	107	1
SMARCAL1	0.0310643	0	99	6	107	1
FBXW7	0.0310643	0	99	6	107	1
PCDH19	0.0310643	0	99	6	107	1
PTPN13	0.0310643	0	99	6	107	1
KRT24	0.0310643	0	99	6	107	1
SF3A2	0.0310643	0	99	6	107	1
RPL37	0.0310643	0	99	6	107	1
CCDC36	0.0310643	0	99	6	107	1
CBLN4	0.0310643	0	99	6	107	1
STRN	0.0310643	0	99	6	107	1
GP6	0.0310643	0	99	6	107	1
AZGP1	0.0310643	0	99	6	107	1
GHSR	0.0310643	0	99	6	107	1
DHX9	0.0310643	0	99	6	107	1
SNX24	0.0310643	0	99	6	107	1
DHRS7C	0.0310643	0	99	6	107	1
RFC1	0.0310643	0	99	6	107	1
ZNF555	0.0310643	0	99	6	107	1
SFTA3	0.0310643	0	99	6	107	1
IFRD2	0.0310643	0	99	6	107	1
ZNF440	0.0310643	0	99	6	107	1
ALDOB	0.0310643	0	99	6	107	1
KAT6B	0.0310643	0	99	6	107	1
FOXRED2	0.0310643	0	99	6	107	1
CDO1	0.0310643	0	99	6	107	1
FAF1	0.0310643	0	99	6	107	1
EDN3	0.0310643	0	99	6	107	1
BRD8	0.0310643	0	99	6	107	1
DPPA3P2	0.0310643	0	99	6	107	1
ZNF384	0.0310643	0	99	6	107	1
ZNF525	0.0310643	0	99	6	107	1
ZNF80	0.0310643	0	99	6	107	1
WDR19	0.0310643	0	99	6	107	1
CSPP1	0.0310643	0	99	6	107	1
HR	0.0310643	0	99	6	107	1
ABAT	0.0310643	0	99	6	107	1
SCN5A	0.0329678	12	87	27	86	1
CASR	0.0332479	9	90	23	90	1
MLK4	0.0341494	3	96	13	100	1
ARHGEF15	0.0341494	3	96	13	100	1
CALCRL	0.0341494	3	96	13	100	1
VCAM1	0.0341494	3	96	13	100	1
SETBP1	0.0341494	3	96	13	100	1
C2orf78	0.0341494	3	96	13	100	1
DPPA2	0.0341494	3	96	13	100	1
ADGRD1	0.0345687	3	96	12	101	1
KAT6A	0.0345687	3	96	12	101	1
RUSC2	0.0345687	3	96	12	101	1
ARHGAP31	0.0345687	3	96	12	101	1
SDK2	0.0345687	3	96	12	101	1
CYP4Z1	0.0345687	3	96	12	101	1
FAM170A	0.0345687	3	96	12	101	1
MGA	0.0345687	3	96	12	101	1
MCTP1	0.0345687	3	96	12	101	1
LRRK2	0.0345687	3	96	12	101	1
ALB	0.0345687	3	96	12	101	1
NMUR2	0.0345687	3	96	12	101	1
HNRNPA3P1	0.0345687	3	96	12	101	1
FGD2	0.0345687	3	96	12	101	1
COL20A1	0.0345687	3	96	12	101	1
CWH43	0.0362696	7	92	19	94	1
SPTB	0.0362696	7	92	19	94	1
HCN1	0.0362696	7	92	19	94	1
ENPEP	0.0362696	7	92	19	94	1
CDH20	0.0366754	5	94	16	97	1
OR4N2	0.0366754	5	94	16	97	1
PCDH17	0.0366754	5	94	16	97	1
SALL4	0.0366754	5	94	16	97	1
CLCN1	0.0366754	5	94	16	97	1
ITGAD	0.0366754	5	94	16	97	1
TRPC4	0.0366754	5	94	16	97	1
ZNF462	0.0381019	2	97	10	103	1
OR52J3	0.0381019	2	97	10	103	1
AFF3	0.0381019	2	97	10	103	1
OR51B5	0.0381019	2	97	10	103	1
IQCH	0.0381019	2	97	10	103	1
OIT3	0.0381019	2	97	10	103	1
SLCO1B1	0.0381019	2	97	10	103	1
CFAP53	0.0381019	2	97	10	103	1
ITGAX	0.0381019	2	97	10	103	1
EPB41L4B	0.0381019	2	97	10	103	1
OR52M1	0.0381019	2	97	10	103	1
TCTE1	0.0381019	2	97	10	103	1
OR2T12	0.0381019	2	97	10	103	1
SGMS1	0.0381019	2	97	10	103	1
CNTN2	0.0381019	2	97	10	103	1
RGPD3	0.0381261	10	89	24	89	1
IQSEC3	0.0387217	1	98	8	105	1
RECK	0.0387217	1	98	8	105	1
TNFSF15	0.0387217	1	98	8	105	1
NME7	0.0387217	1	98	8	105	1
CRACR2A	0.0387217	1	98	8	105	1
PON1	0.0387217	1	98	8	105	1
RASA2	0.0387217	1	98	8	105	1
COX10	0.0387217	1	98	8	105	1
CCDC83	0.0387217	1	98	8	105	1
CYP2E1	0.0387217	1	98	8	105	1
RASGRP3	0.0387217	1	98	8	105	1
MAGI3	0.0387217	1	98	8	105	1
C4A	0.0387217	1	98	8	105	1
PIWIL2	0.0387217	1	98	8	105	1
CHRNA4	0.0387217	1	98	8	105	1
ZNF211	0.0387217	1	98	8	105	1
ADH6	0.0387217	1	98	8	105	1
OR8K5	0.0387217	1	98	8	105	1
ZFP64	0.0387217	1	98	8	105	1
TRBV4-2	0.0387217	1	98	8	105	1
CD180	0.0387217	1	98	8	105	1
MUC15	0.0387217	1	98	8	105	1
CAMSAP2	0.0387217	1	98	8	105	1
TBC1D2B	0.0387217	1	98	8	105	1
DHX38	0.0387217	1	98	8	105	1
SULT1E1	0.0387217	1	98	8	105	1
ZNF626	0.0387217	1	98	8	105	1
PRDM14	0.0387217	1	98	8	105	1
PRSS37	0.0387217	1	98	8	105	1
GALNTL5	0.0387217	1	98	8	105	1
MYBPC2	0.0387217	1	98	8	105	1
LIN7A	0.0387217	1	98	8	105	1
CRISP3	0.0387217	1	98	8	105	1
MED23	0.0387217	1	98	8	105	1
SCUBE1	0.0387217	1	98	8	105	1
TP63	0.0431525	11	88	25	88	1
NBEA	0.0431525	11	88	25	88	1
KIAA2022	0.0431525	11	88	25	88	1
PKHD1	0.0435578	8	91	20	93	1
DSG3	0.0435578	8	91	20	93	1
TCL6	0.0453636	12	87	5	108	1
SYCP2L	0.0458027	4	95	14	99	1
IGHM	0.0458027	4	95	14	99	1
SLFN11	0.0458027	4	95	14	99	1
FOLH1	0.0458027	4	95	14	99	1
ADRA1A	0.0458027	4	95	14	99	1
SEC16A	0.0458027	4	95	14	99	1
ATP1A2	0.0458027	4	95	14	99	1
MME	0.0458027	4	95	14	99	1
SEMG2	0.0458027	4	95	14	99	1
DUOX2	0.0458342	6	93	17	96	1
IGKV2D-29	0.0460172	4	95	0	113	1
PIK3CA	0.0460172	4	95	0	113	1
TNFRSF9	0.0460172	4	95	0	113	1
TRAV8-2	0.0460172	4	95	0	113	1
SAMD4A	0.0460172	4	95	0	113	1
ZCWPW1	0.0460172	4	95	0	113	1
GH2	0.0460172	4	95	0	113	1
RASGEF1C	0.0460172	4	95	0	113	1
KLHL18	0.0460172	4	95	0	113	1
TRMT5	0.0460172	4	95	0	113	1
SATL1	0.0460172	4	95	0	113	1
APOBEC3A	0.0460172	4	95	0	113	1
GUCA2A	0.0460172	4	95	0	113	1
CCNL1	0.0460172	4	95	0	113	1
ZNF692	0.0460172	4	95	0	113	1
DMC1	0.0460172	4	95	0	113	1
NR4A2	0.0460172	4	95	0	113	1
IGHV3-35	0.0460172	4	95	0	113	1
RNU6-354P	0.0460172	4	95	0	113	1
ACLY	0.0460172	4	95	0	113	1
KRTAP13-3	0.0460172	4	95	0	113	1
VASH2	0.0460172	4	95	0	113	1
TDGF1P3	0.0460172	4	95	0	113	1
ANKH	0.0460172	4	95	0	113	1
ERMAP	0.0460172	4	95	0	113	1
MEGF11	0.0460172	4	95	0	113	1
NUDT12	0.0460172	4	95	0	113	1
ITCH	0.0460172	4	95	0	113	1
CDKN2AIP	0.0460172	4	95	0	113	1
GSTM2P1	0.0460172	4	95	0	113	1
PAGE3	0.0460172	4	95	0	113	1
TBC1D3B	0.0460172	4	95	0	113	1
OR5A1	0.0460172	4	95	0	113	1
SFXN1	0.0460172	4	95	0	113	1
GFOD1	0.0460172	4	95	0	113	1
UNC119B	0.0460172	4	95	0	113	1
ZNF385A	0.0460172	4	95	0	113	1
HHIPL1	0.0460172	4	95	0	113	1
MAGEE1	0.0478094	8	91	2	111	1
USP11	0.0478094	8	91	2	111	1
ROS1	0.0482966	12	87	26	87	1
PKHD1L1	0.04872	22	77	40	73	1
KCNT2	0.0501036	9	90	22	91	1
FMN2	0.0501036	9	90	22	91	1
TRPM6	0.0501036	9	90	22	91	1
SUN5	0.0521345	6	93	1	112	1
CXorf57	0.0521345	6	93	1	112	1
FANCB	0.0521345	6	93	1	112	1
SULT1B1	0.0521345	6	93	1	112	1
STARD6	0.0521345	6	93	1	112	1
ZNF738	0.0521345	6	93	1	112	1
MRO	0.0521345	6	93	1	112	1
PNCK	0.0521345	6	93	1	112	1
SARDH	0.0521345	6	93	1	112	1
GFRA3	0.0521345	6	93	1	112	1
RP13-104F24.2	0.0521345	6	93	1	112	1
BRAF	0.0536893	57	42	49	64	1
ERICH3	0.0548386	18	81	34	79	1
TSIX	0.0553307	7	92	18	95	1
TCEB3B	0.0553307	7	92	18	95	1
RPTN	0.0565467	10	89	23	90	1
HHIP	0.0566868	3	96	11	102	1
KCNU1	0.0566868	3	96	11	102	1
KPRP	0.0566868	3	96	11	102	1
CERKL	0.0566868	3	96	11	102	1
PIK3AP1	0.0566868	3	96	11	102	1
KRT1	0.0566868	3	96	11	102	1
CADM3	0.0566868	3	96	11	102	1
TAT	0.0566868	3	96	11	102	1
DSG2	0.0566868	3	96	11	102	1
LAMP5	0.0566868	3	96	11	102	1
GPRIN3	0.0566868	3	96	11	102	1
PTPRR	0.0566868	3	96	11	102	1
NHS	0.0566868	3	96	11	102	1
FRY	0.0580013	5	94	15	98	1
DDX60	0.0580013	5	94	15	98	1
EXPH5	0.0580013	5	94	15	98	1
TECTA	0.0580013	5	94	15	98	1
SLC27A6	0.0580013	5	94	15	98	1
ZNF804B	0.0580013	5	94	15	98	1
COL4A2	0.0580013	5	94	15	98	1
NPAP1	0.0619756	20	79	36	77	1
TTC13	0.0622644	0	99	5	108	1
ARSG	0.0622644	0	99	5	108	1
GALNT11	0.0622644	0	99	5	108	1
FRK	0.0622644	0	99	5	108	1
SLCO1B7	0.0622644	0	99	5	108	1
ZNF439	0.0622644	0	99	5	108	1
CDHR1	0.0622644	0	99	5	108	1
ACVR1	0.0622644	0	99	5	108	1
CCDC64B	0.0622644	0	99	5	108	1
KCNJ2	0.0622644	0	99	5	108	1
GRK4	0.0622644	0	99	5	108	1
LETM1	0.0622644	0	99	5	108	1
CLEC1A	0.0622644	0	99	5	108	1
SAMD12	0.0622644	0	99	5	108	1
IGKV1-16	0.0622644	0	99	5	108	1
CDCA2	0.0622644	0	99	5	108	1
FEZF1	0.0622644	0	99	5	108	1
BOD1L2	0.0622644	0	99	5	108	1
CCDC151	0.0622644	0	99	5	108	1
PPFIBP1	0.0622644	0	99	5	108	1
SLC24A2	0.0622644	0	99	5	108	1
GRAMD1A	0.0622644	0	99	5	108	1
CCR9	0.0622644	0	99	5	108	1
RUVBL2	0.0622644	0	99	5	108	1
KLF3	0.0622644	0	99	5	108	1
ARHGEF40	0.0622644	0	99	5	108	1
TCN2	0.0622644	0	99	5	108	1
DENND5B	0.0622644	0	99	5	108	1
PER1	0.0622644	0	99	5	108	1
WFDC13	0.0622644	0	99	5	108	1
TRBV4-1	0.0622644	0	99	5	108	1
PRKACA	0.0622644	0	99	5	108	1
AC093838.4	0.0622644	0	99	5	108	1
MAP3K6	0.0622644	0	99	5	108	1
CRTAC1	0.0622644	0	99	5	108	1
DEFB112	0.0622644	0	99	5	108	1
SCGB2A1	0.0622644	0	99	5	108	1
GDPD5	0.0622644	0	99	5	108	1
SUPT7L	0.0622644	0	99	5	108	1
ZNF385B	0.0622644	0	99	5	108	1
ANKLE1	0.0622644	0	99	5	108	1
RP11-113D6.10	0.0622644	0	99	5	108	1
DCLK2	0.0622644	0	99	5	108	1
GABPB2	0.0622644	0	99	5	108	1
NBPF2P	0.0622644	0	99	5	108	1
G6PC	0.0622644	0	99	5	108	1
EPPIN	0.0622644	0	99	5	108	1
SNAI1	0.0622644	0	99	5	108	1
EPB41L5	0.0622644	0	99	5	108	1
SLC17A7	0.0622644	0	99	5	108	1
BTN3A2	0.0622644	0	99	5	108	1
SNX14	0.0622644	0	99	5	108	1
SLC25A47	0.0622644	0	99	5	108	1
DPPA5	0.0622644	0	99	5	108	1
BBS12	0.0622644	0	99	5	108	1
SOX6	0.0622644	0	99	5	108	1
KDM5B	0.0622644	0	99	5	108	1
RASEF	0.0622644	0	99	5	108	1
GLE1	0.0622644	0	99	5	108	1
HIRA	0.0622644	0	99	5	108	1
IRAK2	0.0622644	0	99	5	108	1
ENOX2	0.0622644	0	99	5	108	1
FRMD1	0.0622644	0	99	5	108	1
TCP10	0.0622644	0	99	5	108	1
GANC	0.0622644	0	99	5	108	1
METTL7A	0.0622644	0	99	5	108	1
AFMID	0.0622644	0	99	5	108	1
EXOSC7	0.0622644	0	99	5	108	1
PHIP	0.0622644	0	99	5	108	1
ERICH1	0.0622644	0	99	5	108	1
IGFL1	0.0622644	0	99	5	108	1
MGP	0.0622644	0	99	5	108	1
LONRF1	0.0622644	0	99	5	108	1
JMJD8	0.0622644	0	99	5	108	1
RAVER1	0.0622644	0	99	5	108	1
BCAR3	0.0622644	0	99	5	108	1
MICALL1	0.0622644	0	99	5	108	1
SPDYE3	0.0622644	0	99	5	108	1
RGPD1	0.0622644	0	99	5	108	1
SLC27A4	0.0622644	0	99	5	108	1
ALS2CL	0.0622644	0	99	5	108	1
OR52B4	0.0622644	0	99	5	108	1
DEK	0.0622644	0	99	5	108	1
NBPF11	0.0622644	0	99	5	108	1
CNOT6	0.0622644	0	99	5	108	1
OTUD7B	0.0622644	0	99	5	108	1
TRAV13-1	0.0622644	0	99	5	108	1
DIRC1	0.0622644	0	99	5	108	1
C17orf47	0.0622644	0	99	5	108	1
FYCO1	0.0622644	0	99	5	108	1
RP11-108O10.8	0.0622644	0	99	5	108	1
DPEP2	0.0622644	0	99	5	108	1
GOLGA2	0.0622644	0	99	5	108	1
SMYD4	0.0622644	0	99	5	108	1
DLL1	0.0622644	0	99	5	108	1
ZFP28	0.0622644	0	99	5	108	1
DOK7	0.0622644	0	99	5	108	1
CLDN1	0.0622644	0	99	5	108	1
POU1F1	0.0622644	0	99	5	108	1
DPF3	0.0622644	0	99	5	108	1
NEURL4	0.0622644	0	99	5	108	1
UBQLN4	0.0622644	0	99	5	108	1
LACRT	0.0622644	0	99	5	108	1
APOBEC3F	0.0622644	0	99	5	108	1
WASF3	0.0622644	0	99	5	108	1
ZNF597	0.0622644	0	99	5	108	1
SOBP	0.0622644	0	99	5	108	1
FAR2P1	0.0622644	0	99	5	108	1
CXADRP3	0.0622644	0	99	5	108	1
NET1	0.0622644	0	99	5	108	1
ZNF197	0.0622644	0	99	5	108	1
MSLNL	0.0622644	0	99	5	108	1
GGT1	0.0622644	0	99	5	108	1
AGAP5	0.0622644	0	99	5	108	1
ZNF135	0.0622644	0	99	5	108	1
ADGRG2	0.0622644	0	99	5	108	1
GPR84	0.0622644	0	99	5	108	1
SSC4D	0.0622644	0	99	5	108	1
FAM175B	0.0622644	0	99	5	108	1
TRBC2	0.0622644	0	99	5	108	1
RUNDC1	0.0622644	0	99	5	108	1
HPCAL4	0.0622644	0	99	5	108	1
CYP26B1	0.0622644	0	99	5	108	1
TRHDE	0.0630767	11	88	24	89	1
NLRP5	0.0630767	11	88	24	89	1
DNAH17	0.0630767	11	88	24	89	1
ABCA9	0.06487	2	97	9	104	1
LPAR3	0.06487	2	97	9	104	1
ANKRD33	0.06487	2	97	9	104	1
SUSD4	0.06487	2	97	9	104	1
IRGC	0.06487	2	97	9	104	1
KNG1	0.06487	2	97	9	104	1
OR1N1	0.06487	2	97	9	104	1
BMP10	0.06487	2	97	9	104	1
FGF12	0.06487	2	97	9	104	1
IGDCC4	0.06487	2	97	9	104	1
L1TD1	0.06487	2	97	9	104	1
NXF3	0.06487	2	97	9	104	1
TRIM29	0.06487	2	97	9	104	1
MMP26	0.06487	2	97	9	104	1
PLXNB1	0.06487	2	97	9	104	1
PCDHGA7	0.06487	2	97	9	104	1
GCM2	0.06487	2	97	9	104	1
TUSC3	0.06487	2	97	9	104	1
DCAF11	0.06487	2	97	9	104	1
PKP3	0.06487	2	97	9	104	1
SLC5A12	0.06487	2	97	9	104	1
STK33	0.06487	2	97	9	104	1
BDP1	0.06487	2	97	9	104	1
ABCC1	0.06487	2	97	9	104	1
WDR66	0.06487	2	97	9	104	1
SALL2	0.06487	2	97	9	104	1
KIAA0368	0.06487	2	97	9	104	1
DIP2C	0.06487	2	97	9	104	1
OVGP1	0.06487	2	97	9	104	1
RPS6KA6	0.06487	2	97	9	104	1
CCDC39	0.06487	2	97	9	104	1
PARD3	0.06487	2	97	9	104	1
CPT1A	0.06487	2	97	9	104	1
SEMA3A	0.06487	2	97	9	104	1
PPFIA2	0.0650311	8	91	19	94	1
SDK1	0.0650311	8	91	19	94	1
AC078899.1	0.0659624	14	85	7	106	1
HYDIN	0.0675988	22	77	39	74	1
EHMT2	0.0698991	1	98	7	106	1
ZNF391	0.0698991	1	98	7	106	1
HAP1	0.0698991	1	98	7	106	1
CACNB2	0.0698991	1	98	7	106	1
SOGA1	0.0698991	1	98	7	106	1
PLCB2	0.0698991	1	98	7	106	1
NRP2	0.0698991	1	98	7	106	1
CYP11B2	0.0698991	1	98	7	106	1
GAL3ST1	0.0698991	1	98	7	106	1
ZNF438	0.0698991	1	98	7	106	1
DOK6	0.0698991	1	98	7	106	1
OR4D11	0.0698991	1	98	7	106	1
ZNF335	0.0698991	1	98	7	106	1
COPA	0.0698991	1	98	7	106	1
RN7SL319P	0.0698991	1	98	7	106	1
GRM4	0.0698991	1	98	7	106	1
INTS1	0.0698991	1	98	7	106	1
OR5M9	0.0698991	1	98	7	106	1
CTR9	0.0698991	1	98	7	106	1
TLR3	0.0698991	1	98	7	106	1
OR56B1	0.0698991	1	98	7	106	1
DBX2	0.0698991	1	98	7	106	1
NANOGP1	0.0698991	1	98	7	106	1
ARHGEF28	0.0698991	1	98	7	106	1
DCANP1	0.0698991	1	98	7	106	1
REG1B	0.0698991	1	98	7	106	1
AC011467.1	0.0698991	1	98	7	106	1
BCL9L	0.0698991	1	98	7	106	1
CSTL1	0.0698991	1	98	7	106	1
SLC14A1	0.0698991	1	98	7	106	1
LRRC30	0.0698991	1	98	7	106	1
KLHL8	0.0698991	1	98	7	106	1
SYT3	0.0698991	1	98	7	106	1
NOS2	0.0698991	1	98	7	106	1
SLC12A8	0.0698991	1	98	7	106	1
KRT13	0.0698991	1	98	7	106	1
NAV1	0.0698991	1	98	7	106	1
ZNF595	0.0698991	1	98	7	106	1
CLPB	0.0698991	1	98	7	106	1
C14orf177	0.0698991	1	98	7	106	1
LRRC27	0.0698991	1	98	7	106	1
BCR	0.0698991	1	98	7	106	1
C3orf56	0.0698991	1	98	7	106	1
SPRR2B	0.0698991	1	98	7	106	1
R3HDM1	0.0698991	1	98	7	106	1
MAP3K13	0.0698991	1	98	7	106	1
PPL	0.0698991	1	98	7	106	1
SCG3	0.0698991	1	98	7	106	1
TTLL2	0.0698991	1	98	7	106	1
MGLL	0.0698991	1	98	7	106	1
SIRPB2	0.0698991	1	98	7	106	1
OXA1L	0.0698991	1	98	7	106	1
FGFR3	0.0698991	1	98	7	106	1
GPATCH1	0.0698991	1	98	7	106	1
TMEM202	0.0698991	1	98	7	106	1
KIAA0586	0.0698991	1	98	7	106	1
ACTN3	0.0698991	1	98	7	106	1
SULT2A1	0.0698991	1	98	7	106	1
ABLIM2	0.0698991	1	98	7	106	1
KRT77	0.0698991	1	98	7	106	1
HSD3B2	0.0698991	1	98	7	106	1
CTTNBP2NL	0.0698991	1	98	7	106	1
MPO	0.0698991	1	98	7	106	1
IARS2	0.0698991	1	98	7	106	1
C16orf78	0.0698991	1	98	7	106	1
OR52E4	0.0698991	1	98	7	106	1
TMPRSS11A	0.0698991	1	98	7	106	1
MS4A4A	0.0698991	1	98	7	106	1
IP6K3	0.0698991	1	98	7	106	1
KLB	0.0698991	1	98	7	106	1
OR2T34	0.0698991	1	98	7	106	1
IL5RA	0.0698991	1	98	7	106	1
CPE	0.0698991	1	98	7	106	1
SLC39A10	0.0698991	1	98	7	106	1
FGF5	0.0698991	1	98	7	106	1
CACHD1	0.0704462	9	90	3	110	1
GRIK1	0.0704462	9	90	3	110	1
ATP1A4	0.0704462	9	90	3	110	1
KMT2B	0.0704748	6	93	16	97	1
DSCAML1	0.0704748	6	93	16	97	1
MSR1	0.0704748	6	93	16	97	1
HECTD4	0.0704748	6	93	16	97	1
THEMIS	0.0704748	6	93	16	97	1
THSD7B	0.0730787	24	75	41	72	1
PCDHB2	0.0735105	4	95	13	100	1
BNC1	0.0735105	4	95	13	100	1
NAALAD2	0.0735105	4	95	13	100	1
TRPM8	0.0735105	4	95	13	100	1
MYO16	0.0735105	4	95	13	100	1
NTRK1	0.0735105	4	95	13	100	1
IGHG1	0.0735105	4	95	13	100	1
COL27A1	0.0735105	4	95	13	100	1
MEP1A	0.0735105	4	95	13	100	1
CD86	0.0735105	4	95	13	100	1
PDZRN4	0.0735105	4	95	13	100	1
PRDM9	0.0748317	9	90	20	93	1
TCHHL1	0.0748317	9	90	20	93	1
LRP1	0.0748317	9	90	20	93	1
MUC4	0.0748317	9	90	20	93	1
SCN1A	0.0748317	9	90	20	93	1
FBN2	0.0824539	10	89	22	91	1
PPP1R3A	0.0824539	10	89	22	91	1
GRM7	0.0824539	10	89	22	91	1
CDH18	0.0824539	10	89	22	91	1
CGNL1	0.0830292	7	92	17	96	1
ATP13A4	0.0830292	7	92	17	96	1
SLC13A4	0.0856645	7	92	2	111	1
DSTYK	0.0856645	7	92	2	111	1
INO80	0.0856645	7	92	2	111	1
MIB2	0.0856645	7	92	2	111	1
CD1C	0.0877883	12	87	6	107	1
ZNF638	0.0877883	12	87	6	107	1
ZNF99	0.089469	15	84	28	85	1
THSD4	0.0900774	5	94	14	99	1
ADCY1	0.0900774	5	94	14	99	1
CEMIP	0.0900774	5	94	14	99	1
DCX	0.0900774	5	94	14	99	1
NUTM1	0.0900774	5	94	14	99	1
ADGRE1	0.0900774	5	94	14	99	1
ADCY10	0.0900774	5	94	14	99	1
MYH8	0.090684	11	88	23	90	1
LRRC15	0.0915155	3	96	10	103	1
SLCO1A2	0.0915155	3	96	10	103	1
SIGLEC5	0.0915155	3	96	10	103	1
ARHGAP32	0.0915155	3	96	10	103	1
OR6C1	0.0915155	3	96	10	103	1
THBS1	0.0915155	3	96	10	103	1
SHROOM3	0.0915155	3	96	10	103	1
MAEL	0.0915155	3	96	10	103	1
GABBR2	0.0915155	3	96	10	103	1
CORIN	0.0915155	3	96	10	103	1
ANKS1B	0.0915155	3	96	10	103	1
CA10	0.0915155	3	96	10	103	1
LRRC37B	0.0915155	3	96	10	103	1
ANKEF1	0.0915155	3	96	10	103	1
PIK3C2B	0.0915155	3	96	10	103	1
GALNT5	0.0915155	3	96	10	103	1
N4BP2	0.0915155	3	96	10	103	1
PNPLA7	0.0915155	3	96	10	103	1
ZNF665	0.0915155	3	96	10	103	1
PRRC2C	0.0915155	3	96	10	103	1
NUGGC	0.0915155	3	96	10	103	1
USP43	0.0915155	3	96	10	103	1
GLRA3	0.0915155	3	96	10	103	1
CYP7B1	0.0915155	3	96	10	103	1
RALGAPA2	0.0915155	3	96	10	103	1
HMGCLL1	0.0915155	3	96	10	103	1
SPATA31C2	0.0915155	3	96	10	103	1
SPOCD1	0.0932935	10	89	4	109	1
SGK223	0.0932935	10	89	4	109	1
AGL	0.0932935	10	89	4	109	1
DMBT1	0.0942763	16	83	30	83	1
SPOCK3	0.0955272	8	91	18	95	1
GALNT13	0.0955272	8	91	18	95	1
HRASLS5	0.0999042	5	94	1	112	1
GABRD	0.0999042	5	94	1	112	1
BTK	0.0999042	5	94	1	112	1
LUZP4	0.0999042	5	94	1	112	1
TRAV19	0.0999042	5	94	1	112	1
ELL	0.0999042	5	94	1	112	1
SLC25A52	0.0999042	5	94	1	112	1
MTMR14	0.0999042	5	94	1	112	1
CHRNA3	0.0999042	5	94	1	112	1
DCTN1	0.0999042	5	94	1	112	1
TCP11L2	0.0999042	5	94	1	112	1
NPHP1	0.0999042	5	94	1	112	1
GMIP	0.0999042	5	94	1	112	1
LRRTM3	0.0999042	5	94	1	112	1
MAML2	0.0999042	5	94	1	112	1
HLA-DRA	0.0999042	5	94	1	112	1
TMEM185A	0.0999042	5	94	1	112	1
RCC2	0.100183	3	96	0	113	1
SENP6	0.100183	3	96	0	113	1
RAD1	0.100183	3	96	0	113	1
MKKS	0.100183	3	96	0	113	1
TTC14	0.100183	3	96	0	113	1
AP4S1	0.100183	3	96	0	113	1
WSB1	0.100183	3	96	0	113	1
TAS2R5	0.100183	3	96	0	113	1
ZNF250	0.100183	3	96	0	113	1
ENDOD1	0.100183	3	96	0	113	1
ADHFE1	0.100183	3	96	0	113	1
FAM66A	0.100183	3	96	0	113	1
TMEM150C	0.100183	3	96	0	113	1
LIPA	0.100183	3	96	0	113	1
EPSTI1	0.100183	3	96	0	113	1
DPT	0.100183	3	96	0	113	1
ZDHHC8	0.100183	3	96	0	113	1
PARP6	0.100183	3	96	0	113	1
GNAT2	0.100183	3	96	0	113	1
ESX1	0.100183	3	96	0	113	1
FOXA1	0.100183	3	96	0	113	1
ITFG1	0.100183	3	96	0	113	1
ENTPD4	0.100183	3	96	0	113	1
RNU6-1266P	0.100183	3	96	0	113	1
ZNF623	0.100183	3	96	0	113	1
DLD	0.100183	3	96	0	113	1
RPUSD2	0.100183	3	96	0	113	1
EGFL8	0.100183	3	96	0	113	1
OR5C1	0.100183	3	96	0	113	1
TSSC4	0.100183	3	96	0	113	1
DCST1	0.100183	3	96	0	113	1
NT5E	0.100183	3	96	0	113	1
HAUS3	0.100183	3	96	0	113	1
LYPD2	0.100183	3	96	0	113	1
ENO1	0.100183	3	96	0	113	1
EGR4	0.100183	3	96	0	113	1
MS4A12	0.100183	3	96	0	113	1
HOXA4	0.100183	3	96	0	113	1
PIH1D3	0.100183	3	96	0	113	1
TCIRG1	0.100183	3	96	0	113	1
USP13	0.100183	3	96	0	113	1
NPLOC4	0.100183	3	96	0	113	1
CTSA	0.100183	3	96	0	113	1
SLC16A1	0.100183	3	96	0	113	1
PQLC2	0.100183	3	96	0	113	1
ECM1	0.100183	3	96	0	113	1
CRTC3	0.100183	3	96	0	113	1
DIO1	0.100183	3	96	0	113	1
PPP1R42	0.100183	3	96	0	113	1
VAT1	0.100183	3	96	0	113	1
OR10A5	0.100183	3	96	0	113	1
FUK	0.100183	3	96	0	113	1
HRSP12	0.100183	3	96	0	113	1
CTPS2	0.100183	3	96	0	113	1
POTEB3	0.100183	3	96	0	113	1
HTRA4	0.100183	3	96	0	113	1
FRG2B	0.100183	3	96	0	113	1
C2orf27B	0.100183	3	96	0	113	1
THOC6	0.100183	3	96	0	113	1
GJC3	0.100183	3	96	0	113	1
ASMTL	0.100183	3	96	0	113	1
ZNF670	0.100183	3	96	0	113	1
STIM1	0.100183	3	96	0	113	1
ERRFI1	0.100183	3	96	0	113	1
DPF2	0.100183	3	96	0	113	1
CLDN4	0.100183	3	96	0	113	1
ZNF878	0.100183	3	96	0	113	1
ZNF511	0.100183	3	96	0	113	1
PHTF1	0.100183	3	96	0	113	1
NDUFB5	0.100183	3	96	0	113	1
LRRFIP2	0.100183	3	96	0	113	1
ZNF704	0.100183	3	96	0	113	1
CDKAL1	0.100183	3	96	0	113	1
PAIP2	0.100183	3	96	0	113	1
IDUA	0.100183	3	96	0	113	1
ZKSCAN1	0.100183	3	96	0	113	1
LRRC46	0.100183	3	96	0	113	1
CEP76	0.100183	3	96	0	113	1
GALNS	0.100183	3	96	0	113	1
FBXO45	0.100183	3	96	0	113	1
TMEM189-UBE2V1	0.100183	3	96	0	113	1
CALR	0.100183	3	96	0	113	1
ACTG1	0.100183	3	96	0	113	1
TPP2	0.100183	3	96	0	113	1
METTL24	0.100183	3	96	0	113	1
SRSF4	0.100183	3	96	0	113	1
MIR498	0.100183	3	96	0	113	1
ANKRD32	0.100183	3	96	0	113	1
SETD8	0.100183	3	96	0	113	1
FCGR2A	0.100183	3	96	0	113	1
MBIP	0.100183	3	96	0	113	1
ALDH4A1	0.100183	3	96	0	113	1
FAM210A	0.100183	3	96	0	113	1
TRIM14	0.100183	3	96	0	113	1
DMRTB1	0.100183	3	96	0	113	1
SLC29A2	0.100183	3	96	0	113	1
ZC3H12C	0.100183	3	96	0	113	1
C9orf152	0.100183	3	96	0	113	1
KLF14	0.100183	3	96	0	113	1
HNRNPH2	0.100183	3	96	0	113	1
SULF1	0.106435	6	93	15	98	1
CTNND2	0.106435	6	93	15	98	1
AL078471.5	0.106435	6	93	15	98	1
MYO5C	0.106435	6	93	15	98	1
INPP5D	0.106435	6	93	15	98	1
ATP10B	0.106435	6	93	15	98	1
PRAMEF14	0.106435	6	93	15	98	1
MYH13	0.106435	6	93	15	98	1
CAPN13	0.106435	6	93	15	98	1
SLC22A9	0.106435	6	93	15	98	1
FLNC	0.106958	13	86	25	88	1
TENM2	0.107874	9	90	19	94	1
MACF1	0.107874	9	90	19	94	1
SLIT3	0.107874	9	90	19	94	1
PIK3C2G	0.107874	9	90	19	94	1
TLR4	0.107874	9	90	19	94	1
MUC7	0.108744	2	97	8	105	1
IGSF21	0.108744	2	97	8	105	1
MICAL3	0.108744	2	97	8	105	1
COL13A1	0.108744	2	97	8	105	1
CAD	0.108744	2	97	8	105	1
CCDC68	0.108744	2	97	8	105	1
GATB	0.108744	2	97	8	105	1
PLA2G4A	0.108744	2	97	8	105	1
OR5K4	0.108744	2	97	8	105	1
OR6C65	0.108744	2	97	8	105	1
NBAS	0.108744	2	97	8	105	1
SHANK1	0.108744	2	97	8	105	1
OR52L1	0.108744	2	97	8	105	1
SLC4A3	0.108744	2	97	8	105	1
CYP4F8	0.108744	2	97	8	105	1
VIT	0.108744	2	97	8	105	1
SLC6A20	0.108744	2	97	8	105	1
ANKRD30B	0.108744	2	97	8	105	1
DHX34	0.108744	2	97	8	105	1
CAMSAP3	0.108744	2	97	8	105	1
PROKR2	0.108744	2	97	8	105	1
VPS41	0.108744	2	97	8	105	1
LIPH	0.108744	2	97	8	105	1
SLC6A16	0.108744	2	97	8	105	1
TAS2R1	0.108744	2	97	8	105	1
CEACAM21	0.108744	2	97	8	105	1
OR7D4	0.108744	2	97	8	105	1
CABP7	0.108744	2	97	8	105	1
GRPR	0.108744	2	97	8	105	1
CCDC93	0.108744	2	97	8	105	1
FSIP1	0.108744	2	97	8	105	1
ZNF341	0.108744	2	97	8	105	1
ZNF492	0.108744	2	97	8	105	1
PTPRG	0.108744	2	97	8	105	1
CDK5RAP2	0.108744	2	97	8	105	1
SLC25A21	0.108744	2	97	8	105	1
UBE4B	0.108744	2	97	8	105	1
SH3GL3	0.108744	2	97	8	105	1
PRB1	0.108744	2	97	8	105	1
ADGRF4	0.108744	2	97	8	105	1
MATN4	0.108744	2	97	8	105	1
DBH	0.108744	2	97	8	105	1
EFCAB12	0.108744	2	97	8	105	1
ABCA6	0.108744	2	97	8	105	1
ACOT11	0.108744	2	97	8	105	1
ALLC	0.108744	2	97	8	105	1
EIF3IP1	0.108744	2	97	8	105	1
RANBP17	0.108744	2	97	8	105	1
SYCE1	0.108744	2	97	8	105	1
ANKRD45	0.108744	2	97	8	105	1
ABL1	0.108744	2	97	8	105	1
PCDH15	0.111722	28	71	44	69	1
DNAH10	0.115161	20	79	34	79	1
CFH	0.115647	4	95	12	101	1
TGM6	0.115647	4	95	12	101	1
KIR3DL3	0.115647	4	95	12	101	1
GALNT8	0.115647	4	95	12	101	1
FAM65C	0.115647	4	95	12	101	1
SLC6A1	0.115647	4	95	12	101	1
ANKFN1	0.115647	4	95	12	101	1
ITIH1	0.115647	4	95	12	101	1
PRAMEF18	0.115647	4	95	12	101	1
CYTIP	0.115647	4	95	12	101	1
LUZP2	0.115647	4	95	12	101	1
ARSJ	0.115647	4	95	12	101	1
IQGAP2	0.115647	4	95	12	101	1
KIF13A	0.115647	4	95	12	101	1
ACSM4	0.115647	4	95	12	101	1
SLC27A2	0.117463	10	89	5	108	1
CD33	0.117463	10	89	5	108	1
PRKCB	0.117463	10	89	5	108	1
DOCK3	0.118114	10	89	21	92	1
SAMD9	0.118114	10	89	21	92	1
XIRP1	0.118114	10	89	21	92	1
IGSF10	0.118114	10	89	21	92	1
OR11H6	0.118451	8	91	3	110	1
AFF4	0.118451	8	91	3	110	1
MKRN3	0.118451	8	91	3	110	1
GABRB3	0.118451	8	91	3	110	1
KALRN	0.120004	10	89	20	93	1
C7	0.120004	10	89	20	93	1
CDH10	0.120004	10	89	20	93	1
GRIN3A	0.120004	10	89	20	93	1
AHNAK	0.122416	7	92	16	97	1
COL19A1	0.122416	7	92	16	97	1
AKAP9	0.122416	7	92	16	97	1
GABRA2	0.122416	7	92	16	97	1
CNTN5	0.122849	15	84	27	86	1
SF1	0.12453	1	98	6	107	1
SPOCK1	0.12453	1	98	6	107	1
XPOT	0.12453	1	98	6	107	1
C22orf42	0.12453	1	98	6	107	1
KRAS	0.12453	1	98	6	107	1
FAM83G	0.12453	1	98	6	107	1
C3P1	0.12453	1	98	6	107	1
ATAD3C	0.12453	1	98	6	107	1
SVOPL	0.12453	1	98	6	107	1
SEPP1	0.12453	1	98	6	107	1
SND1	0.12453	1	98	6	107	1
ARHGEF4	0.12453	1	98	6	107	1
SH3PXD2A	0.12453	1	98	6	107	1
SERPINB9	0.12453	1	98	6	107	1
ADAMTS3	0.12453	1	98	6	107	1
METTL2A	0.12453	1	98	6	107	1
P4HA1	0.12453	1	98	6	107	1
WNK1	0.12453	1	98	6	107	1
C1QTNF9B	0.12453	1	98	6	107	1
RIPK3	0.12453	1	98	6	107	1
C16orf62	0.12453	1	98	6	107	1
TPH2	0.12453	1	98	6	107	1
CCIN	0.12453	1	98	6	107	1
ILF3	0.12453	1	98	6	107	1
KRTAP24-1	0.12453	1	98	6	107	1
AKAP11	0.12453	1	98	6	107	1
PSTPIP2	0.12453	1	98	6	107	1
OR11A1	0.12453	1	98	6	107	1
SNAP25	0.12453	1	98	6	107	1
ZNF148	0.12453	1	98	6	107	1
ATP4A	0.12453	1	98	6	107	1
ZNF681	0.12453	1	98	6	107	1
SLC22A15	0.12453	1	98	6	107	1
EHBP1	0.12453	1	98	6	107	1
SRRM1	0.12453	1	98	6	107	1
NEFH	0.12453	1	98	6	107	1
DLK1	0.12453	1	98	6	107	1
OAS1	0.12453	1	98	6	107	1
OR56A4	0.12453	1	98	6	107	1
RP11-656G20.1	0.12453	1	98	6	107	1
FBXW9	0.12453	1	98	6	107	1
KRT33B	0.12453	1	98	6	107	1
CPXM1	0.12453	1	98	6	107	1
ALPI	0.12453	1	98	6	107	1
RHBDF2	0.12453	1	98	6	107	1
GMEB1	0.12453	1	98	6	107	1
HRH4	0.12453	1	98	6	107	1
EDC4	0.12453	1	98	6	107	1
TSPAN2	0.12453	1	98	6	107	1
EXOC6	0.12453	1	98	6	107	1
GLB1L2	0.12453	1	98	6	107	1
ZNF583	0.12453	1	98	6	107	1
CENPJ	0.12453	1	98	6	107	1
EHD3	0.12453	1	98	6	107	1
SLC8A2	0.12453	1	98	6	107	1
TGM2	0.12453	1	98	6	107	1
CACNG7	0.12453	1	98	6	107	1
FAM83D	0.12453	1	98	6	107	1
AXIN1	0.12453	1	98	6	107	1
C10orf12	0.12453	1	98	6	107	1
OR6F1	0.12453	1	98	6	107	1
NIN	0.12453	1	98	6	107	1
CST9L	0.12453	1	98	6	107	1
RTP2	0.12453	1	98	6	107	1
GZMA	0.12453	1	98	6	107	1
ATP10A	0.12453	1	98	6	107	1
OR6S1	0.12453	1	98	6	107	1
TH	0.12453	1	98	6	107	1
SPDYE7P	0.12453	1	98	6	107	1
SFTPD	0.12453	1	98	6	107	1
KAT2A	0.12453	1	98	6	107	1
NAALADL1	0.12453	1	98	6	107	1
ZNF730	0.12453	1	98	6	107	1
PIK3CB	0.12453	1	98	6	107	1
AGTPBP1	0.12453	1	98	6	107	1
CD300LF	0.12453	1	98	6	107	1
CSN2	0.12453	1	98	6	107	1
CECR1	0.12453	1	98	6	107	1
RGPD8	0.12453	1	98	6	107	1
ITGA11	0.12453	1	98	6	107	1
EIF3I	0.12453	1	98	6	107	1
CD84	0.12453	1	98	6	107	1
MMP9	0.12453	1	98	6	107	1
CETN1	0.12453	1	98	6	107	1
ATP13A2	0.12453	1	98	6	107	1
TOM1	0.12453	1	98	6	107	1
SPRED2	0.12453	1	98	6	107	1
C10orf107	0.12453	1	98	6	107	1
TUB	0.12453	1	98	6	107	1
NAA11	0.12453	1	98	6	107	1
PEAR1	0.12453	1	98	6	107	1
IQSEC1	0.12453	1	98	6	107	1
PAPOLB	0.12453	1	98	6	107	1
IBTK	0.12453	1	98	6	107	1
WHSC1	0.12453	1	98	6	107	1
EIF3B	0.12453	1	98	6	107	1
FBF1	0.12453	1	98	6	107	1
OR7G3	0.12453	1	98	6	107	1
DMP1	0.12453	1	98	6	107	1
CAMKV	0.12453	1	98	6	107	1
JADE2	0.12453	1	98	6	107	1
KIAA1467	0.12453	1	98	6	107	1
INHBC	0.12453	1	98	6	107	1
SERBP1	0.12453	1	98	6	107	1
GPCPD1	0.12453	1	98	6	107	1
RFX7	0.12453	1	98	6	107	1
RNASE11	0.12453	1	98	6	107	1
CALR3	0.12453	1	98	6	107	1
AGAP9	0.12453	1	98	6	107	1
HTR3D	0.12453	1	98	6	107	1
NT5DC2	0.12453	1	98	6	107	1
PRSS12	0.12453	1	98	6	107	1
OR5P3	0.12453	1	98	6	107	1
ABHD2	0.12453	1	98	6	107	1
SYT2	0.12453	1	98	6	107	1
ARNTL2	0.12453	1	98	6	107	1
HUNK	0.12453	1	98	6	107	1
MAML3	0.12453	1	98	6	107	1
RSPH10B	0.12453	1	98	6	107	1
PPIB	0.12453	1	98	6	107	1
ABI3BP	0.12453	1	98	6	107	1
KRTAP10-10	0.12453	1	98	6	107	1
CTAGE6	0.12453	1	98	6	107	1
CYP1A2	0.12453	1	98	6	107	1
NOM1	0.12453	1	98	6	107	1
OR14C36	0.12453	1	98	6	107	1
VIPR2	0.12453	1	98	6	107	1
MPP2	0.12453	1	98	6	107	1
KIAA0100	0.12453	1	98	6	107	1
LHX6	0.124727	0	99	4	109	1
COL4A3BP	0.124727	0	99	4	109	1
PPP2R4	0.124727	0	99	4	109	1
EEF1G	0.124727	0	99	4	109	1
TBC1D4	0.124727	0	99	4	109	1
GLP2R	0.124727	0	99	4	109	1
ALG3	0.124727	0	99	4	109	1
SNRPB	0.124727	0	99	4	109	1
ZNF155	0.124727	0	99	4	109	1
C1orf111	0.124727	0	99	4	109	1
TLK1	0.124727	0	99	4	109	1
DGCR8	0.124727	0	99	4	109	1
CYP2J2	0.124727	0	99	4	109	1
PTPRJ	0.124727	0	99	4	109	1
CTSLP2	0.124727	0	99	4	109	1
ARPC1A	0.124727	0	99	4	109	1
G6PC2	0.124727	0	99	4	109	1
C1QTNF1	0.124727	0	99	4	109	1
AC116165.1	0.124727	0	99	4	109	1
RPP30	0.124727	0	99	4	109	1
DDX10	0.124727	0	99	4	109	1
ZNF77	0.124727	0	99	4	109	1
PPM1B	0.124727	0	99	4	109	1
SCLY	0.124727	0	99	4	109	1
NMD3	0.124727	0	99	4	109	1
C12orf5	0.124727	0	99	4	109	1
IPO7	0.124727	0	99	4	109	1
TRAV8-1	0.124727	0	99	4	109	1
LIPN	0.124727	0	99	4	109	1
2019-09-02	0.124727	0	99	4	109	1
GPRIN1	0.124727	0	99	4	109	1
ZFP3	0.124727	0	99	4	109	1
ADAM8	0.124727	0	99	4	109	1
BTG4	0.124727	0	99	4	109	1
DTX4	0.124727	0	99	4	109	1
IL6ST	0.124727	0	99	4	109	1
VIP	0.124727	0	99	4	109	1
GUCA2B	0.124727	0	99	4	109	1
KIRREL	0.124727	0	99	4	109	1
IGHV3-43	0.124727	0	99	4	109	1
FGF11	0.124727	0	99	4	109	1
OOEP	0.124727	0	99	4	109	1
OR2AG1	0.124727	0	99	4	109	1
AP3D1	0.124727	0	99	4	109	1
NSRP1	0.124727	0	99	4	109	1
TTLL11	0.124727	0	99	4	109	1
AIF1	0.124727	0	99	4	109	1
ZNF680	0.124727	0	99	4	109	1
OR10G8	0.124727	0	99	4	109	1
ZNF644	0.124727	0	99	4	109	1
UGT1A7	0.124727	0	99	4	109	1
SEC24B	0.124727	0	99	4	109	1
ZMPSTE24	0.124727	0	99	4	109	1
HS3ST6	0.124727	0	99	4	109	1
HSD3BP2	0.124727	0	99	4	109	1
TINF2	0.124727	0	99	4	109	1
C16orf90	0.124727	0	99	4	109	1
C1orf61	0.124727	0	99	4	109	1
SNX9	0.124727	0	99	4	109	1
DPY19L4	0.124727	0	99	4	109	1
C12orf77	0.124727	0	99	4	109	1
VPS33A	0.124727	0	99	4	109	1
GIGYF1	0.124727	0	99	4	109	1
STIM2	0.124727	0	99	4	109	1
FABP9	0.124727	0	99	4	109	1
CHCHD1	0.124727	0	99	4	109	1
ERGIC3	0.124727	0	99	4	109	1
HOXA2	0.124727	0	99	4	109	1
CBLN2	0.124727	0	99	4	109	1
MTFMT	0.124727	0	99	4	109	1
ADK	0.124727	0	99	4	109	1
CHKB	0.124727	0	99	4	109	1
SLC30A4	0.124727	0	99	4	109	1
ISLR2	0.124727	0	99	4	109	1
RIPPLY3	0.124727	0	99	4	109	1
GJB2	0.124727	0	99	4	109	1
DIS3L2	0.124727	0	99	4	109	1
DNAJB2	0.124727	0	99	4	109	1
C17orf53	0.124727	0	99	4	109	1
LMCD1	0.124727	0	99	4	109	1
MAOA	0.124727	0	99	4	109	1
ZNF397	0.124727	0	99	4	109	1
STRIP1	0.124727	0	99	4	109	1
ANKRD20A19P	0.124727	0	99	4	109	1
ABCE1	0.124727	0	99	4	109	1
KCNN2	0.124727	0	99	4	109	1
GTF2E1	0.124727	0	99	4	109	1
SLC7A8	0.124727	0	99	4	109	1
RP11-404K5.2	0.124727	0	99	4	109	1
ZRSR1	0.124727	0	99	4	109	1
OLIG3	0.124727	0	99	4	109	1
OCM	0.124727	0	99	4	109	1
FILIP1L	0.124727	0	99	4	109	1
BLOC1S5-TXNDC5	0.124727	0	99	4	109	1
SLC23A2	0.124727	0	99	4	109	1
FCHO2	0.124727	0	99	4	109	1
SLC22A3	0.124727	0	99	4	109	1
SERINC2	0.124727	0	99	4	109	1
SUOX	0.124727	0	99	4	109	1
ZNF253	0.124727	0	99	4	109	1
FBXL2	0.124727	0	99	4	109	1
NTPCR	0.124727	0	99	4	109	1
HIC2	0.124727	0	99	4	109	1
PNPLA8	0.124727	0	99	4	109	1
LPP	0.124727	0	99	4	109	1
MMP17	0.124727	0	99	4	109	1
CDHR5	0.124727	0	99	4	109	1
EXT1	0.124727	0	99	4	109	1
CXorf23	0.124727	0	99	4	109	1
PJA2	0.124727	0	99	4	109	1
FFAR1	0.124727	0	99	4	109	1
DEPDC1	0.124727	0	99	4	109	1
PAPD7	0.124727	0	99	4	109	1
HSPA6	0.124727	0	99	4	109	1
CATIP	0.124727	0	99	4	109	1
PTENP1-AS	0.124727	0	99	4	109	1
PRCC	0.124727	0	99	4	109	1
PSORS1C2	0.124727	0	99	4	109	1
GGT8P	0.124727	0	99	4	109	1
APOBEC3C	0.124727	0	99	4	109	1
NRBF2	0.124727	0	99	4	109	1
EARS2	0.124727	0	99	4	109	1
GOLGA6A	0.124727	0	99	4	109	1
MAPK6	0.124727	0	99	4	109	1
FAM177B	0.124727	0	99	4	109	1
LCNL1	0.124727	0	99	4	109	1
BHMT	0.124727	0	99	4	109	1
GPRC5A	0.124727	0	99	4	109	1
PIF1	0.124727	0	99	4	109	1
ZNF474	0.124727	0	99	4	109	1
SLC18A2	0.124727	0	99	4	109	1
TMEM154	0.124727	0	99	4	109	1
NMBR	0.124727	0	99	4	109	1
BTC	0.124727	0	99	4	109	1
TPRX1	0.124727	0	99	4	109	1
OR6C76	0.124727	0	99	4	109	1
PDS5A	0.124727	0	99	4	109	1
IFT140	0.124727	0	99	4	109	1
PDK3	0.124727	0	99	4	109	1
RP11-483E23.2	0.124727	0	99	4	109	1
ADAMTS15	0.124727	0	99	4	109	1
MFAP3	0.124727	0	99	4	109	1
NRROS	0.124727	0	99	4	109	1
CDKN1A	0.124727	0	99	4	109	1
MAMLD1	0.124727	0	99	4	109	1
KRTAP5-4	0.124727	0	99	4	109	1
TMEM54	0.124727	0	99	4	109	1
LDHD	0.124727	0	99	4	109	1
C20orf27	0.124727	0	99	4	109	1
SOAT2	0.124727	0	99	4	109	1
TTLL7	0.124727	0	99	4	109	1
NAB1	0.124727	0	99	4	109	1
TEF	0.124727	0	99	4	109	1
MLF1	0.124727	0	99	4	109	1
BTF3	0.124727	0	99	4	109	1
MAN2A1	0.124727	0	99	4	109	1
TATDN3	0.124727	0	99	4	109	1
MCU	0.124727	0	99	4	109	1
IRX2	0.124727	0	99	4	109	1
FAM65A	0.124727	0	99	4	109	1
ANAPC5	0.124727	0	99	4	109	1
XXbac-BPG32J3.19	0.124727	0	99	4	109	1
CCDC114	0.124727	0	99	4	109	1
MAPK3	0.124727	0	99	4	109	1
ZNF302	0.124727	0	99	4	109	1
SRD5A2	0.124727	0	99	4	109	1
GIT2	0.124727	0	99	4	109	1
RP11-368J21.3	0.124727	0	99	4	109	1
SLC29A1	0.124727	0	99	4	109	1
C2orf48	0.124727	0	99	4	109	1
SLC38A11	0.124727	0	99	4	109	1
ZNF75D	0.124727	0	99	4	109	1
RECQL4	0.124727	0	99	4	109	1
ECSIT	0.124727	0	99	4	109	1
CLASP2	0.124727	0	99	4	109	1
CLIC5	0.124727	0	99	4	109	1
LMAN1	0.124727	0	99	4	109	1
PTBP2	0.124727	0	99	4	109	1
ACSM6	0.124727	0	99	4	109	1
TXNRD2	0.124727	0	99	4	109	1
DEFB110	0.124727	0	99	4	109	1
TYR	0.124727	0	99	4	109	1
IRAK4	0.124727	0	99	4	109	1
SYNPR	0.124727	0	99	4	109	1
DDX1	0.124727	0	99	4	109	1
MAFB	0.124727	0	99	4	109	1
GMPPB	0.124727	0	99	4	109	1
SLC10A7	0.124727	0	99	4	109	1
USP17L15	0.124727	0	99	4	109	1
INHBB	0.124727	0	99	4	109	1
CAPN11	0.124727	0	99	4	109	1
POU5F1B	0.124727	0	99	4	109	1
ACPT	0.124727	0	99	4	109	1
CAMK2B	0.124727	0	99	4	109	1
RPL21P13	0.124727	0	99	4	109	1
TOP3B	0.124727	0	99	4	109	1
PLK2	0.124727	0	99	4	109	1
PRMT5	0.124727	0	99	4	109	1
AQP12B	0.124727	0	99	4	109	1
RPL3L	0.124727	0	99	4	109	1
MANSC1	0.124727	0	99	4	109	1
SAA1	0.124727	0	99	4	109	1
SLC36A3	0.124727	0	99	4	109	1
ZNF48	0.124727	0	99	4	109	1
CCBL2	0.124727	0	99	4	109	1
MAVS	0.124727	0	99	4	109	1
DGCR2	0.124727	0	99	4	109	1
RNF40	0.124727	0	99	4	109	1
GAPT	0.124727	0	99	4	109	1
2019-09-08	0.124727	0	99	4	109	1
IDH3B	0.124727	0	99	4	109	1
SLC35F6	0.124727	0	99	4	109	1
CASP8	0.124727	0	99	4	109	1
CYP2W1	0.124727	0	99	4	109	1
DDX39B	0.124727	0	99	4	109	1
OR2S2	0.124727	0	99	4	109	1
H2BFWT	0.124727	0	99	4	109	1
HRASLS	0.124727	0	99	4	109	1
LRRC37A	0.124727	0	99	4	109	1
RASGEF1A	0.124727	0	99	4	109	1
SDF4	0.124727	0	99	4	109	1
2019-09-10	0.124727	0	99	4	109	1
POGLUT1	0.124727	0	99	4	109	1
PPBP	0.124727	0	99	4	109	1
ZNF37BP	0.124727	0	99	4	109	1
EPB42	0.124727	0	99	4	109	1
PPP1R2P4	0.124727	0	99	4	109	1
FOXO1	0.124727	0	99	4	109	1
ECI2	0.124727	0	99	4	109	1
CPLX4	0.124727	0	99	4	109	1
TMEM198	0.124727	0	99	4	109	1
STK16	0.124727	0	99	4	109	1
TSNARE1	0.124727	0	99	4	109	1
SLK	0.124727	0	99	4	109	1
SH3KBP1	0.124727	0	99	4	109	1
POLR2B	0.124727	0	99	4	109	1
PLEKHA2	0.124727	0	99	4	109	1
PERP	0.124727	0	99	4	109	1
UPK1B	0.124727	0	99	4	109	1
GCLC	0.124727	0	99	4	109	1
CCSER2	0.124727	0	99	4	109	1
SNUPN	0.124727	0	99	4	109	1
PAX6	0.124727	0	99	4	109	1
MAN2C1	0.124727	0	99	4	109	1
BRE	0.124727	0	99	4	109	1
SHD	0.124727	0	99	4	109	1
B3GNT8	0.124727	0	99	4	109	1
SPRYD3	0.124727	0	99	4	109	1
CCDC101	0.124727	0	99	4	109	1
TMTC2	0.124727	0	99	4	109	1
TCEA3	0.124727	0	99	4	109	1
IRS4	0.124727	0	99	4	109	1
GCAT	0.124727	0	99	4	109	1
ISL2	0.124727	0	99	4	109	1
KRR1	0.124727	0	99	4	109	1
LHFPL5	0.124727	0	99	4	109	1
GZF1	0.124727	0	99	4	109	1
HFE	0.124727	0	99	4	109	1
ABCF3	0.124727	0	99	4	109	1
DTX3	0.124727	0	99	4	109	1
EFHC2	0.124727	0	99	4	109	1
RHPN1	0.124727	0	99	4	109	1
SPP2	0.124727	0	99	4	109	1
CCDC77	0.124727	0	99	4	109	1
R3HDM2	0.124727	0	99	4	109	1
TOX3	0.124727	0	99	4	109	1
CEP170	0.124727	0	99	4	109	1
KDM4D	0.124727	0	99	4	109	1
POU4F2	0.124727	0	99	4	109	1
EDEM1	0.124727	0	99	4	109	1
SLC17A3	0.124727	0	99	4	109	1
FOXR2	0.124727	0	99	4	109	1
USF1	0.124727	0	99	4	109	1
NFKB2	0.124727	0	99	4	109	1
TUBBP5	0.124727	0	99	4	109	1
LYPD6	0.124727	0	99	4	109	1
CTD-3105H18.14	0.124727	0	99	4	109	1
SHISA2	0.124727	0	99	4	109	1
SETDB1	0.124727	0	99	4	109	1
ACO1	0.124727	0	99	4	109	1
ZNF273	0.124727	0	99	4	109	1
KLRC1	0.124727	0	99	4	109	1
SEZ6L	0.12814	11	88	22	91	1
NEBL	0.12814	11	88	22	91	1
SALL1	0.12814	11	88	22	91	1
PXDNL	0.12814	11	88	22	91	1
PCLO	0.128468	39	60	57	56	1
DNAH3	0.130299	23	76	37	76	1
TTN	0.133451	65	34	85	28	1
NOTCH3	0.135535	11	88	6	107	1
FLT1	0.135535	11	88	6	107	1
PRAMEF2	0.135535	11	88	6	107	1
AMER3	0.137154	5	94	13	100	1
PRDM16	0.137154	5	94	13	100	1
PCDHA9	0.137154	5	94	13	100	1
PPP4R4	0.137154	5	94	13	100	1
NID2	0.137154	5	94	13	100	1
PHKA1	0.137154	5	94	13	100	1
AFM	0.137154	5	94	13	100	1
EML5	0.137154	5	94	13	100	1
GYS2	0.137154	5	94	13	100	1
SLC26A9	0.137154	5	94	13	100	1
NOVA1	0.137154	5	94	13	100	1
2019-03-10	0.137154	5	94	13	100	1
CLK2P1	0.137154	5	94	13	100	1
MROH7	0.137924	8	91	17	96	1
C3	0.137924	8	91	17	96	1
DDX60L	0.137924	8	91	17	96	1
FCRL5	0.13796	12	87	23	90	1
FBXW12	0.145174	3	96	9	104	1
PHACTR3	0.145174	3	96	9	104	1
DYRK4	0.145174	3	96	9	104	1
HTRA1	0.145174	3	96	9	104	1
VWA8	0.145174	3	96	9	104	1
IL18R1	0.145174	3	96	9	104	1
CPNE4	0.145174	3	96	9	104	1
SENP7	0.145174	3	96	9	104	1
MMP3	0.145174	3	96	9	104	1
KLRC4-KLRK1	0.145174	3	96	9	104	1
CPA3	0.145174	3	96	9	104	1
APCS	0.145174	3	96	9	104	1
INMT	0.145174	3	96	9	104	1
LOXL2	0.145174	3	96	9	104	1
ZP2	0.145174	3	96	9	104	1
CTTNBP2	0.145174	3	96	9	104	1
IL31RA	0.145174	3	96	9	104	1
ROR2	0.145174	3	96	9	104	1
MLXIPL	0.145174	3	96	9	104	1
SCAPER	0.145174	3	96	9	104	1
PARP4	0.145174	3	96	9	104	1
LAMC1	0.145174	3	96	9	104	1
GDA	0.145174	3	96	9	104	1
COL18A1	0.145174	3	96	9	104	1
MYOF	0.145174	3	96	9	104	1
CLEC3A	0.145174	3	96	9	104	1
CCDC37	0.145174	3	96	9	104	1
SEZ6L2	0.145174	3	96	9	104	1
ARFGEF2	0.145174	3	96	9	104	1
UGT1A6	0.145174	3	96	9	104	1
NOMO1	0.145174	3	96	9	104	1
GLRA1	0.145174	3	96	9	104	1
IL20RA	0.145174	3	96	9	104	1
ZNF28	0.145174	3	96	9	104	1
NCAM1	0.145174	3	96	9	104	1
OR51A7	0.145174	3	96	9	104	1
SYNJ1	0.145174	3	96	9	104	1
IL37	0.145174	3	96	9	104	1
NEO1	0.145174	3	96	9	104	1
NTN4	0.145174	3	96	9	104	1
OR5J2	0.145174	3	96	9	104	1
EPB41L1	0.145174	3	96	9	104	1
DPM2	0.145174	3	96	9	104	1
ZNF812	0.145174	3	96	9	104	1
AC015849.16	0.145174	3	96	9	104	1
PLCXD3	0.145174	3	96	9	104	1
TNFSF14	0.145174	3	96	9	104	1
ZNF490	0.145174	3	96	9	104	1
DCSTAMP	0.145174	3	96	9	104	1
RAB3IP	0.145174	3	96	9	104	1
DLG5	0.145174	3	96	9	104	1
LAD1	0.145174	3	96	9	104	1
CFAP46	0.145174	3	96	9	104	1
ANKRD24	0.145174	3	96	9	104	1
ZNF780B	0.145174	3	96	9	104	1
CHRNB3	0.145174	3	96	9	104	1
ZP4	0.145174	3	96	9	104	1
IGHG3	0.145174	3	96	9	104	1
PDGFC	0.145174	3	96	9	104	1
OR52E6	0.145174	3	96	9	104	1
TLL1	0.146557	28	71	22	91	1
COL3A1	0.147562	13	86	24	89	1
CD163L1	0.147562	13	86	24	89	1
MROH2B	0.147575	19	80	32	81	1
MAGEB6	0.149331	9	90	4	109	1
SV2C	0.149331	9	90	4	109	1
RSPH6A	0.149331	9	90	4	109	1
SLC9A9	0.149331	9	90	4	109	1
PLAG1	0.149988	6	93	2	111	1
MED24	0.149988	6	93	2	111	1
IMPDH1	0.149988	6	93	2	111	1
FAM71A	0.149988	6	93	2	111	1
ZNF14	0.149988	6	93	2	111	1
OR2M7	0.149988	6	93	2	111	1
PRB4	0.149988	6	93	2	111	1
FAM19A2	0.149988	6	93	2	111	1
ABL2	0.149988	6	93	2	111	1
ABCG8	0.149988	6	93	2	111	1
MYZAP	0.149988	6	93	2	111	1
CHAF1A	0.149988	6	93	2	111	1
WFDC8	0.149988	6	93	2	111	1
ZNF683	0.149988	6	93	2	111	1
E2F8	0.149988	6	93	2	111	1
HTATSF1	0.149988	6	93	2	111	1
BRWD1	0.149988	6	93	2	111	1
CDCP1	0.149988	6	93	2	111	1
CTIF	0.149988	6	93	2	111	1
CEACAM6	0.149988	6	93	2	111	1
DUXA	0.149988	6	93	2	111	1
NCKAP5	0.152909	9	90	18	95	1
ARAP2	0.152909	9	90	18	95	1
NF1	0.152909	9	90	18	95	1
KCNB1	0.152909	9	90	18	95	1
F5	0.152909	9	90	18	95	1
RBM47	0.152932	12	87	7	106	1
MYH2	0.15564	30	69	24	89	1
NLRP1	0.157657	6	93	14	99	1
LRRC3B	0.157657	6	93	14	99	1
LRBA	0.157657	6	93	14	99	1
UNC13A	0.157657	6	93	14	99	1
ZNF735	0.157657	6	93	14	99	1
ADAMTS2	0.157657	6	93	14	99	1
MEFV	0.157657	6	93	14	99	1
ANPEP	0.157657	6	93	14	99	1
ADGRF5	0.157657	6	93	14	99	1
LRRIQ1	0.157657	6	93	14	99	1
CELSR1	0.157657	6	93	14	99	1
PCDHA3	0.157657	6	93	14	99	1
PZP	0.157657	6	93	14	99	1
SPAM1	0.157657	6	93	14	99	1
DUSP27	0.157657	6	93	14	99	1
RELN	0.159517	23	76	17	96	1
SCN7A	0.167347	10	89	19	94	1
ADAMTS6	0.167347	10	89	19	94	1
DSC1	0.167347	10	89	19	94	1
ROBO2	0.167347	10	89	19	94	1
KIR3DL2	0.167347	10	89	19	94	1
HNF4G	0.169606	13	86	8	105	1
DPY19L2P1	0.169606	13	86	8	105	1
GPR179	0.177106	7	92	15	98	1
TKTL2	0.177106	7	92	15	98	1
KCNH6	0.177106	7	92	15	98	1
SLC9C1	0.177106	7	92	15	98	1
FILIP1	0.177106	7	92	15	98	1
CNTN6	0.177106	7	92	15	98	1
SERPINB3	0.177106	7	92	15	98	1
HCRTR2	0.177106	7	92	15	98	1
NPSR1	0.177106	7	92	15	98	1
COL4A3	0.177835	11	88	21	92	1
KEL	0.177835	11	88	21	92	1
TIAM1	0.177968	4	95	11	102	1
GPX5	0.177968	4	95	11	102	1
ADAMTS7	0.177968	4	95	11	102	1
CD96	0.177968	4	95	11	102	1
RP11-407N17.3	0.177968	4	95	11	102	1
KRT6C	0.177968	4	95	11	102	1
CSF2RA	0.177968	4	95	11	102	1
HAL	0.177968	4	95	11	102	1
OR9A4	0.177968	4	95	11	102	1
GPLD1	0.177968	4	95	11	102	1
CNTN3	0.177968	4	95	11	102	1
ACPP	0.177968	4	95	11	102	1
MUC5AC	0.177968	4	95	11	102	1
OR13C8	0.177968	4	95	11	102	1
SERPINB11	0.177968	4	95	11	102	1
CDYL2	0.177968	4	95	11	102	1
UBR5	0.177968	4	95	11	102	1
BCL11B	0.177968	4	95	11	102	1
EGF	0.177968	4	95	11	102	1
HAO2	0.177968	4	95	11	102	1
ATP6V0A4	0.177968	4	95	11	102	1
SLITRK1	0.177968	4	95	11	102	1
PALLD	0.177968	4	95	11	102	1
IMPG1	0.177968	4	95	11	102	1
EYA1	0.177968	4	95	11	102	1
ACSS3	0.177968	4	95	11	102	1
CHL1	0.177968	4	95	11	102	1
MYH7B	0.177968	4	95	11	102	1
CYP3A4	0.178587	4	95	10	103	1
OR2M3	0.178587	4	95	10	103	1
LDB2	0.178587	4	95	10	103	1
ITGA7	0.178587	4	95	10	103	1
USP31	0.178587	4	95	10	103	1
SMG8	0.178587	4	95	10	103	1
TBC1D8B	0.178587	4	95	10	103	1
LAMB3	0.178587	4	95	10	103	1
GDF5	0.178587	4	95	10	103	1
FAM120C	0.178587	4	95	10	103	1
RASAL2	0.178587	4	95	10	103	1
PDE7B	0.178587	4	95	10	103	1
KRT71	0.178587	4	95	10	103	1
PRAMEF11	0.178587	4	95	10	103	1
RET	0.178587	4	95	10	103	1
TP53BP1	0.178587	4	95	10	103	1
LHCGR	0.178587	4	95	10	103	1
OR8H3	0.178587	4	95	10	103	1
ZNF835	0.178587	4	95	10	103	1
GIMAP5	0.178587	4	95	10	103	1
STON1	0.178587	4	95	10	103	1
APBB1IP	0.178587	4	95	10	103	1
SLC17A8	0.178587	4	95	10	103	1
UGT2B17	0.178587	4	95	10	103	1
NEK10	0.178587	4	95	10	103	1
COBLL1	0.178587	4	95	10	103	1
SLC26A8	0.178587	4	95	10	103	1
CFAP70	0.178587	4	95	10	103	1
C6orf222	0.178587	4	95	10	103	1
ATG2A	0.178587	4	95	10	103	1
FAM184A	0.178587	4	95	10	103	1
OR13C9	0.178587	4	95	10	103	1
RADIL	0.178587	4	95	10	103	1
SLC26A7	0.178587	4	95	10	103	1
BTNL8	0.178587	4	95	10	103	1
WEE2	0.178587	4	95	10	103	1
PTPN14	0.17902	2	97	7	106	1
KCNK18	0.17902	2	97	7	106	1
AKR1B10	0.17902	2	97	7	106	1
SGMS1-AS1	0.17902	2	97	7	106	1
USP33	0.17902	2	97	7	106	1
FBXO39	0.17902	2	97	7	106	1
KCNA5	0.17902	2	97	7	106	1
OR2T33	0.17902	2	97	7	106	1
OR14K1	0.17902	2	97	7	106	1
SPRR2E	0.17902	2	97	7	106	1
PTGIS	0.17902	2	97	7	106	1
PDE1B	0.17902	2	97	7	106	1
LRRC43	0.17902	2	97	7	106	1
ARGFX	0.17902	2	97	7	106	1
GAPVD1	0.17902	2	97	7	106	1
KAZN	0.17902	2	97	7	106	1
CLSTN3	0.17902	2	97	7	106	1
MAN1A2	0.17902	2	97	7	106	1
OR4K17	0.17902	2	97	7	106	1
DENND1C	0.17902	2	97	7	106	1
CA3	0.17902	2	97	7	106	1
ULK1	0.17902	2	97	7	106	1
ZNF658B	0.17902	2	97	7	106	1
SCNN1B	0.17902	2	97	7	106	1
AHDC1	0.17902	2	97	7	106	1
ELOVL4	0.17902	2	97	7	106	1
DPPA4	0.17902	2	97	7	106	1
ZNFX1	0.17902	2	97	7	106	1
UBR2	0.17902	2	97	7	106	1
C1R	0.17902	2	97	7	106	1
PROC	0.17902	2	97	7	106	1
CABP4	0.17902	2	97	7	106	1
CFHR1	0.17902	2	97	7	106	1
TULP1	0.17902	2	97	7	106	1
NOX3	0.17902	2	97	7	106	1
CCDC30	0.17902	2	97	7	106	1
BMP3	0.17902	2	97	7	106	1
CEACAM20	0.17902	2	97	7	106	1
UBE3A	0.17902	2	97	7	106	1
ANKRD12	0.17902	2	97	7	106	1
C7orf34	0.17902	2	97	7	106	1
MAPK10	0.17902	2	97	7	106	1
TRAV12-1	0.17902	2	97	7	106	1
FPGT-TNNI3K	0.17902	2	97	7	106	1
BACH2	0.17902	2	97	7	106	1
PRG4	0.17902	2	97	7	106	1
CRYBB2	0.17902	2	97	7	106	1
BTNL3	0.17902	2	97	7	106	1
CNGA3	0.17902	2	97	7	106	1
LBR	0.17902	2	97	7	106	1
TOX	0.17902	2	97	7	106	1
CFHR3	0.17902	2	97	7	106	1
ITIH3	0.17902	2	97	7	106	1
MN1	0.17902	2	97	7	106	1
ITGB6	0.17902	2	97	7	106	1
CFAP74	0.17902	2	97	7	106	1
DOCK8	0.17902	2	97	7	106	1
ASIC5	0.17902	2	97	7	106	1
FANCM	0.17902	2	97	7	106	1
DOPEY1	0.17902	2	97	7	106	1
RASSF6	0.17902	2	97	7	106	1
OR5V1	0.17902	2	97	7	106	1
BRCA2	0.17902	2	97	7	106	1
IL1RAPL1	0.17902	2	97	7	106	1
SLC6A19	0.17902	2	97	7	106	1
TRIM53AP	0.17902	2	97	7	106	1
AOC2	0.17902	2	97	7	106	1
KERA	0.17902	2	97	7	106	1
SATB1	0.17902	2	97	7	106	1
HEATR4	0.17902	2	97	7	106	1
PIGR	0.17902	2	97	7	106	1
RLTPR	0.17902	2	97	7	106	1
OR5D14	0.17902	2	97	7	106	1
POU6F1	0.17902	2	97	7	106	1
PLCL1	0.17902	2	97	7	106	1
ITGA2	0.17902	2	97	7	106	1
ZNF782	0.17902	2	97	7	106	1
TMEM119	0.17902	2	97	7	106	1
SPON1	0.17902	2	97	7	106	1
AMZ1	0.17902	2	97	7	106	1
PCDH8	0.17902	2	97	7	106	1
HSD3B1	0.17902	2	97	7	106	1
SLC16A14	0.17902	2	97	7	106	1
HERC3	0.17902	2	97	7	106	1
USP24	0.17902	2	97	7	106	1
PGLYRP2	0.17902	2	97	7	106	1
NXPH2	0.17902	2	97	7	106	1
RAD54L2	0.17902	2	97	7	106	1
ITGA9	0.17902	2	97	7	106	1
SLC17A2	0.17902	2	97	7	106	1
KNSTRN	0.17902	2	97	7	106	1
GRHL1	0.17902	2	97	7	106	1
HERC5	0.17902	2	97	7	106	1
BRPF3	0.17902	2	97	7	106	1
UBE3B	0.17902	2	97	7	106	1
ALDH5A1	0.17902	2	97	7	106	1
CLEC4M	0.17902	2	97	7	106	1
TNRC18	0.17902	2	97	7	106	1
OTOP3	0.17902	2	97	7	106	1
AKR1C3	0.17902	2	97	7	106	1
RBM46	0.17902	2	97	7	106	1
CD101	0.17902	2	97	7	106	1
SLC7A2	0.17902	2	97	7	106	1
ATM	0.17902	2	97	7	106	1
ZMAT4	0.17902	2	97	7	106	1
OBSCN	0.18369	17	82	28	85	1
UBE2J2	0.187263	4	95	1	112	1
DCAF13	0.187263	4	95	1	112	1
LARP4	0.187263	4	95	1	112	1
FGD3	0.187263	4	95	1	112	1
ZNF586	0.187263	4	95	1	112	1
NUP93	0.187263	4	95	1	112	1
MST1R	0.187263	4	95	1	112	1
CAT	0.187263	4	95	1	112	1
TUBA3E	0.187263	4	95	1	112	1
LRRC8D	0.187263	4	95	1	112	1
HMGB1P1	0.187263	4	95	1	112	1
GDAP1	0.187263	4	95	1	112	1
HDAC5	0.187263	4	95	1	112	1
ART1	0.187263	4	95	1	112	1
KCTD7	0.187263	4	95	1	112	1
ZC3H6	0.187263	4	95	1	112	1
AHCY	0.187263	4	95	1	112	1
DHRS3	0.187263	4	95	1	112	1
CYP24A1	0.187263	4	95	1	112	1
TUBB4A	0.187263	4	95	1	112	1
STEAP3	0.187263	4	95	1	112	1
ZNF408	0.187263	4	95	1	112	1
ESR2	0.187263	4	95	1	112	1
SNORD115-18	0.187263	4	95	1	112	1
RASIP1	0.187263	4	95	1	112	1
PRKACG	0.187263	4	95	1	112	1
HZGJ	0.187263	4	95	1	112	1
GPC1	0.187263	4	95	1	112	1
TRAV14DV4	0.187263	4	95	1	112	1
ZNF329	0.187263	4	95	1	112	1
INPP5F	0.187263	4	95	1	112	1
CUL3	0.187263	4	95	1	112	1
TBC1D22A	0.187263	4	95	1	112	1
ASPHD1	0.187263	4	95	1	112	1
SLC1A7	0.187263	4	95	1	112	1
FBLN1	0.187263	4	95	1	112	1
MDFI	0.187263	4	95	1	112	1
REN	0.187263	4	95	1	112	1
PDE3B	0.187263	4	95	1	112	1
ALKBH3	0.187263	4	95	1	112	1
GJC1	0.187263	4	95	1	112	1
PDE5A	0.187263	4	95	1	112	1
ZNF584	0.187263	4	95	1	112	1
KRT85	0.187263	4	95	1	112	1
RNF216	0.187263	4	95	1	112	1
FAM92A1P2	0.187263	4	95	1	112	1
HM13	0.187263	4	95	1	112	1
VAV2	0.187263	4	95	1	112	1
PAIP1	0.187263	4	95	1	112	1
DHX15	0.187263	4	95	1	112	1
ETV5	0.187263	4	95	1	112	1
MFSD1	0.187263	4	95	1	112	1
GATA4	0.187263	4	95	1	112	1
KIF2C	0.187263	4	95	1	112	1
SYN1	0.187263	4	95	1	112	1
MMP21	0.187263	4	95	1	112	1
MPZL2	0.187263	4	95	1	112	1
AKR7A3	0.187263	4	95	1	112	1
LIN28B	0.187263	4	95	1	112	1
PIWIL3	0.187263	4	95	1	112	1
ARFGAP3	0.187263	4	95	1	112	1
SLITRK2	0.187263	4	95	1	112	1
SASS6	0.187263	4	95	1	112	1
KCNK16	0.187263	4	95	1	112	1
CD300LG	0.187263	4	95	1	112	1
ZNF266	0.187263	4	95	1	112	1
ZNF766	0.187263	4	95	1	112	1
SMOC2	0.187263	4	95	1	112	1
SLX4IP	0.187263	4	95	1	112	1
ANXA1	0.187263	4	95	1	112	1
HRNR	0.189189	12	87	22	91	1
RYR3	0.189189	12	87	22	91	1
PTPRC	0.189189	12	87	22	91	1
IGF2R	0.194304	7	92	3	110	1
MAP2K1	0.194304	7	92	3	110	1
MARS	0.194304	7	92	3	110	1
ACTC1	0.194304	7	92	3	110	1
CHD2	0.194304	7	92	3	110	1
TCF4	0.194304	7	92	3	110	1
RNF152	0.194304	7	92	3	110	1
MCM3AP	0.194304	7	92	3	110	1
OR5T1	0.194304	7	92	3	110	1
ZNF667	0.194304	7	92	3	110	1
HCN3	0.194304	7	92	3	110	1
KIF21B	0.195512	8	91	16	97	1
HECW2	0.195512	8	91	16	97	1
ITPR1	0.195512	8	91	16	97	1
FAT2	0.195512	8	91	16	97	1
TRPM2	0.195512	8	91	16	97	1
ST6GAL2	0.195512	8	91	16	97	1
MYO9A	0.195512	8	91	16	97	1
DSC2	0.195512	8	91	16	97	1
KIAA1217	0.200153	13	86	23	90	1
UNC79	0.200153	13	86	23	90	1
SLIT2	0.200153	13	86	23	90	1
SLC2A10	0.20403	10	89	6	107	1
KCNH1	0.20403	10	89	6	107	1
COL8A1	0.204369	5	94	12	101	1
MCHR2	0.204369	5	94	12	101	1
REV3L	0.204369	5	94	12	101	1
SERPINB4	0.204369	5	94	12	101	1
PCDHAC2	0.204369	5	94	12	101	1
HRG	0.204369	5	94	12	101	1
KCNN3	0.204369	5	94	12	101	1
DYNC2H1	0.204369	5	94	12	101	1
GIMAP2	0.204369	5	94	12	101	1
TBC1D3P2	0.204369	5	94	12	101	1
SLC16A9	0.204369	5	94	12	101	1
CCDC178	0.204369	5	94	12	101	1
TTBK1	0.204369	5	94	12	101	1
RHAG	0.204369	5	94	12	101	1
ZNF385D	0.204369	5	94	12	101	1
VCAN	0.210738	14	85	24	89	1
ADGRB3	0.210738	14	85	24	89	1
DSP	0.210738	14	85	24	89	1
RUNX1T1	0.212913	9	90	17	96	1
ASTN2	0.212913	9	90	17	96	1
KIF2B	0.212913	9	90	17	96	1
SPAG17	0.212913	9	90	17	96	1
TNN	0.212913	9	90	17	96	1
CHD6	0.212913	9	90	17	96	1
SFXN4	0.216892	2	97	0	113	1
IGLV1-50	0.216892	2	97	0	113	1
RNASET2	0.216892	2	97	0	113	1
SNORD115-26	0.216892	2	97	0	113	1
MIR517B	0.216892	2	97	0	113	1
SPG7	0.216892	2	97	0	113	1
TFAP2E	0.216892	2	97	0	113	1
RP11-545J16.1	0.216892	2	97	0	113	1
DDA1	0.216892	2	97	0	113	1
C9orf173	0.216892	2	97	0	113	1
GOLGA7B	0.216892	2	97	0	113	1
HEY2	0.216892	2	97	0	113	1
HESX1	0.216892	2	97	0	113	1
S100A11	0.216892	2	97	0	113	1
SRD5A1	0.216892	2	97	0	113	1
DCLRE1CP1	0.216892	2	97	0	113	1
DLX6	0.216892	2	97	0	113	1
CBX3	0.216892	2	97	0	113	1
TRIM73	0.216892	2	97	0	113	1
ACTN4	0.216892	2	97	0	113	1
C16orf13	0.216892	2	97	0	113	1
C5orf38	0.216892	2	97	0	113	1
RAB41	0.216892	2	97	0	113	1
RP11-3P17.4	0.216892	2	97	0	113	1
UBE2A	0.216892	2	97	0	113	1
CLIC2	0.216892	2	97	0	113	1
NUBP1	0.216892	2	97	0	113	1
RPN2	0.216892	2	97	0	113	1
RPS13	0.216892	2	97	0	113	1
RIPPLY2	0.216892	2	97	0	113	1
DHFR	0.216892	2	97	0	113	1
C1orf64	0.216892	2	97	0	113	1
GDF5OS	0.216892	2	97	0	113	1
CRELD2	0.216892	2	97	0	113	1
MLN	0.216892	2	97	0	113	1
ITM2B	0.216892	2	97	0	113	1
CPSF3L	0.216892	2	97	0	113	1
PNRC2	0.216892	2	97	0	113	1
SGCG	0.216892	2	97	0	113	1
ARSD	0.216892	2	97	0	113	1
SLC35F5	0.216892	2	97	0	113	1
FOSL2	0.216892	2	97	0	113	1
TMEM217	0.216892	2	97	0	113	1
COX20	0.216892	2	97	0	113	1
SRY	0.216892	2	97	0	113	1
RECQL	0.216892	2	97	0	113	1
RNASE13	0.216892	2	97	0	113	1
HDHD2	0.216892	2	97	0	113	1
PNMA2	0.216892	2	97	0	113	1
PGAP3	0.216892	2	97	0	113	1
C10orf90	0.216892	2	97	0	113	1
SH3GL1	0.216892	2	97	0	113	1
MIR299	0.216892	2	97	0	113	1
OXSM	0.216892	2	97	0	113	1
ADCK2	0.216892	2	97	0	113	1
TMEM56	0.216892	2	97	0	113	1
NEK3	0.216892	2	97	0	113	1
PHC2	0.216892	2	97	0	113	1
SP4	0.216892	2	97	0	113	1
CTHRC1	0.216892	2	97	0	113	1
CERS1	0.216892	2	97	0	113	1
SPATA13	0.216892	2	97	0	113	1
PDCD2L	0.216892	2	97	0	113	1
CXCL10	0.216892	2	97	0	113	1
PSMA1	0.216892	2	97	0	113	1
COQ3	0.216892	2	97	0	113	1
WNT1	0.216892	2	97	0	113	1
TRAIP	0.216892	2	97	0	113	1
EMP2	0.216892	2	97	0	113	1
SNAPC5	0.216892	2	97	0	113	1
GRAMD3	0.216892	2	97	0	113	1
METTL15	0.216892	2	97	0	113	1
TBPL2	0.216892	2	97	0	113	1
LYZL4	0.216892	2	97	0	113	1
GTF2E2	0.216892	2	97	0	113	1
SPSB1	0.216892	2	97	0	113	1
RARA	0.216892	2	97	0	113	1
DDX24	0.216892	2	97	0	113	1
APPL1	0.216892	2	97	0	113	1
ZNF829	0.216892	2	97	0	113	1
DCUN1D4	0.216892	2	97	0	113	1
TCF3	0.216892	2	97	0	113	1
KLRG1	0.216892	2	97	0	113	1
RHOBTB3	0.216892	2	97	0	113	1
NHLRC3	0.216892	2	97	0	113	1
ANGPTL2	0.216892	2	97	0	113	1
FOXL1	0.216892	2	97	0	113	1
MORF4L1	0.216892	2	97	0	113	1
THYN1	0.216892	2	97	0	113	1
TAF7	0.216892	2	97	0	113	1
NDEL1	0.216892	2	97	0	113	1
KIF20A	0.216892	2	97	0	113	1
RNU6-181P	0.216892	2	97	0	113	1
SORD	0.216892	2	97	0	113	1
KIF5B	0.216892	2	97	0	113	1
PGBD5	0.216892	2	97	0	113	1
INO80B	0.216892	2	97	0	113	1
PIH1D2	0.216892	2	97	0	113	1
ETV3L	0.216892	2	97	0	113	1
IAPP	0.216892	2	97	0	113	1
AQP12A	0.216892	2	97	0	113	1
ZNF565	0.216892	2	97	0	113	1
ATRIP	0.216892	2	97	0	113	1
NDUFAF1	0.216892	2	97	0	113	1
CIRBP	0.216892	2	97	0	113	1
GGN	0.216892	2	97	0	113	1
IL18	0.216892	2	97	0	113	1
C1orf109	0.216892	2	97	0	113	1
HSPA8	0.216892	2	97	0	113	1
ZNF45	0.216892	2	97	0	113	1
TAAR9	0.216892	2	97	0	113	1
C14orf159	0.216892	2	97	0	113	1
TCTN3	0.216892	2	97	0	113	1
FCHSD2	0.216892	2	97	0	113	1
PARP3	0.216892	2	97	0	113	1
ZBTB5	0.216892	2	97	0	113	1
PCDHGB7	0.216892	2	97	0	113	1
GPR26	0.216892	2	97	0	113	1
SSTR2	0.216892	2	97	0	113	1
ZNF549	0.216892	2	97	0	113	1
FOXG1	0.216892	2	97	0	113	1
FMR1NB	0.216892	2	97	0	113	1
GSK3A	0.216892	2	97	0	113	1
IGLV1-41	0.216892	2	97	0	113	1
BAG3	0.216892	2	97	0	113	1
NEDD4	0.216892	2	97	0	113	1
METTL9	0.216892	2	97	0	113	1
PPIAL4A	0.216892	2	97	0	113	1
VAX1	0.216892	2	97	0	113	1
HPCA	0.216892	2	97	0	113	1
PRSS54	0.216892	2	97	0	113	1
ICAM4	0.216892	2	97	0	113	1
S100A16	0.216892	2	97	0	113	1
PCBP4	0.216892	2	97	0	113	1
UBL3	0.216892	2	97	0	113	1
RPL39P34	0.216892	2	97	0	113	1
[truncated: 17,088 more rows]
