# Supplementary material for: Epigenomic and genomic analysis of transcriptome modulation in skin cutaneous melanoma
Source: Aging (Albany NY). 2020 Jul 7;12(13):12703–25. doi: 10.18632/aging.103115 (PMC7377867; doi:10.18632/aging.103115)
Supplement: Supplementary Table 13 [file aging-12-103115-s013..xlsx]

## Sheet: S13_Table
Supplementary Table 13. SNV loci of differential genes between iC1 and iC3 subtypes.
gName	SNV	FisherP	Mut_iC1	Nor_iC1	Mut_iC3	Nor_iC3	padj
TPTE	c.1340C>T	0.0310643	0	99	6	107	1
BRAF	c.1799T>A	0.050625	49	50	40	73	1
COL21A1	c.2629G>A	0.0622644	0	99	5	108	1
SMG8	c.-24G>A	0.0698991	1	98	7	106	1
DZIP1	c.2411G>A	0.100183	3	96	0	113	1
OR2T11	c.269C>T	0.100183	3	96	0	113	1
MUC16	c.10142C>T	0.100183	3	96	0	113	1
PLG	c.1951G>A	0.100183	3	96	0	113	1
ADCYAP1R1	c.1238G>A	0.100183	3	96	0	113	1
PSG9	c.1162C>T	0.100183	3	96	0	113	1
SLC26A3	c.1022G>A	0.100183	3	96	0	113	1
TUBA3C	c.1168C>T	0.100183	3	96	0	113	1
ADAMTS14	c.817C>T	0.100183	3	96	0	113	1
WBP11P1	n.1781C>T	0.100183	3	96	0	113	1
MUC3A	c.8285C>T	0.100183	3	96	0	113	1
LYPD2	c.139G>A	0.100183	3	96	0	113	1
STON2	c.500C>T	0.100183	3	96	0	113	1
UGT2B11		0.100183	3	96	0	113	1
SUCNR1	c.358C>T	0.100183	3	96	0	113	1
UNC13C	c.745G>A	0.100183	3	96	0	113	1
PCDH15	c.4552G>A	0.100183	3	96	0	113	1
BRAF	c.1801A>G	0.100183	3	96	0	113	1
TMEM200A	c.1293G>A	0.100183	3	96	0	113	1
NAT2	c.821C>T	0.100183	3	96	0	113	1
B3GALT1	c.596G>A	0.100183	3	96	0	113	1
PRLR	c.1219C>T	0.100183	3	96	0	113	1
XIRP2	c.1684G>A	0.124727	0	99	4	109	1
OR6C1	c.209C>T	0.124727	0	99	4	109	1
CHEK2P2	n.449C>T	0.124727	0	99	4	109	1
MRPL53	c.-20C>T	0.124727	0	99	4	109	1
OR2T12	c.629C>T	0.124727	0	99	4	109	1
MGEA5	c.1886C>T	0.216892	2	97	0	113	1
ZNF408	c.172C>T	0.216892	2	97	0	113	1
SYNE1	c.16867C>T	0.216892	2	97	0	113	1
ABCC6	c.763G>A	0.216892	2	97	0	113	1
SULT1B1	c.202G>A	0.216892	2	97	0	113	1
TTN	c.39521G>A	0.216892	2	97	0	113	1
VWA5A	c.1912C>T	0.216892	2	97	0	113	1
MUC16	c.5425G>A	0.216892	2	97	0	113	1
MYH2	c.-20-1G>A	0.216892	2	97	0	113	1
UBR4	c.10831C>T	0.216892	2	97	0	113	1
CSMD1	c.4180G>A	0.216892	2	97	0	113	1
OR5H1	c.364C>T	0.216892	2	97	0	113	1
RP1	c.3352C>T	0.216892	2	97	0	113	1
IQGAP2	c.1039G>A	0.216892	2	97	0	113	1
CASP3	c.439C>T	0.216892	2	97	0	113	1
LGR6	c.2588C>T	0.216892	2	97	0	113	1
SMARCA4	c.4511C>T	0.216892	2	97	0	113	1
FCAR	c.428C>T	0.216892	2	97	0	113	1
PACRG	c.217C>T	0.216892	2	97	0	113	1
FAT4	c.6445G>A	0.216892	2	97	0	113	1
PEG3	c.3490G>A	0.216892	2	97	0	113	1
IGF1R	c.524C>T	0.216892	2	97	0	113	1
RIMBP2	c.1276G>A	0.216892	2	97	0	113	1
FRMD7	c.1444C>T	0.216892	2	97	0	113	1
GNAT2	c.826G>A	0.216892	2	97	0	113	1
TRHR	c.4G>A	0.216892	2	97	0	113	1
MAPK10	c.947C>T	0.216892	2	97	0	113	1
ABCC11	c.3394C>T	0.216892	2	97	0	113	1
HBD		0.216892	2	97	0	113	1
SPANXN5	c.139G>A	0.216892	2	97	0	113	1
PLGLA	n.265C>T	0.216892	2	97	0	113	1
RP11-445N18.7	n.19G>A	0.216892	2	97	0	113	1
LPAR4	c.406C>T	0.216892	2	97	0	113	1
PQLC2	c.401C>T	0.216892	2	97	0	113	1
PCDH20	c.1273G>A	0.216892	2	97	0	113	1
HILPDA	c.*13C>T	0.216892	2	97	0	113	1
C1orf186	c.409G>A	0.216892	2	97	0	113	1
INPP5D	c.1279C>T	0.216892	2	97	0	113	1
GHRHR	c.885G>A	0.216892	2	97	0	113	1
MUC16	c.707C>T	0.216892	2	97	0	113	1
PLXNA4	c.1803G>A	0.216892	2	97	0	113	1
TGIF2LY	c.-17G>A	0.216892	2	97	0	113	1
SKIV2L	c.-98G>A	0.216892	2	97	0	113	1
KIF4B	c.1198G>A	0.216892	2	97	0	113	1
LPAR4	c.1063G>A	0.216892	2	97	0	113	1
MKRN3	c.398C>T	0.216892	2	97	0	113	1
RUNX1T1	c.703G>A	0.216892	2	97	0	113	1
CARD11	c.1246G>A	0.216892	2	97	0	113	1
MGAM	c.1574G>A	0.216892	2	97	0	113	1
GIMAP7	c.730G>A	0.216892	2	97	0	113	1
TRAV3	c.-45G>A	0.216892	2	97	0	113	1
STAP1	c.785G>A	0.216892	2	97	0	113	1
MAPK4	c.223G>A	0.216892	2	97	0	113	1
LPAR1	c.473G>A	0.216892	2	97	0	113	1
ALOX15	c.1906G>A	0.216892	2	97	0	113	1
MYLK4	c.523G>A	0.216892	2	97	0	113	1
IL36B	c.43C>T	0.216892	2	97	0	113	1
OR2F1	c.443C>T	0.216892	2	97	0	113	1
TTN	c.391C>T	0.216892	2	97	0	113	1
GRHL2	c.128C>T	0.216892	2	97	0	113	1
DSG1	c.-58G>A	0.216892	2	97	0	113	1
MIR135A2	n.99C>T	0.216892	2	97	0	113	1
CFTR	c.989G>A	0.216892	2	97	0	113	1
APOB	c.8725G>A	0.216892	2	97	0	113	1
CD86	c.617C>T	0.216892	2	97	0	113	1
IGF2BP2	c.527C>T	0.216892	2	97	0	113	1
BPIFB3	c.176C>T	0.216892	2	97	0	113	1
LIFR	c.2806C>T	0.216892	2	97	0	113	1
ERC2	c.2677G>A	0.216892	2	97	0	113	1
PHLDB2	c.1165G>A	0.216892	2	97	0	113	1
UNC79	c.2746C>T	0.216892	2	97	0	113	1
RIT2	c.88G>A	0.216892	2	97	0	113	1
TACR3	c.*9C>T	0.216892	2	97	0	113	1
TRANK1	c.5879C>T	0.216892	2	97	0	113	1
CLIP1	c.3323C>T	0.216892	2	97	0	113	1
ZNF318	c.1661C>T	0.216892	2	97	0	113	1
SLC38A4	c.92G>A	0.216892	2	97	0	113	1
FOXP1	c.1343C>T	0.216892	2	97	0	113	1
FAM221B	c.3G>A	0.216892	2	97	0	113	1
SNORD116-10		0.216892	2	97	0	113	1
COL3A1	c.1402G>A	0.216892	2	97	0	113	1
CD163	c.1981G>A	0.216892	2	97	0	113	1
HSD17B7P2	n.183G>A	0.216892	2	97	0	113	1
SLCO6A1	c.40G>A	0.216892	2	97	0	113	1
ANGPT1	c.1184G>A	0.216892	2	97	0	113	1
CEACAM6	c.184C>T	0.216892	2	97	0	113	1
DEFB121	c.-23C>T	0.216892	2	97	0	113	1
GFRAL	c.314C>T	0.216892	2	97	0	113	1
PLCB4	c.266C>T	0.216892	2	97	0	113	1
SRGAP3	c.1777C>T	0.216892	2	97	0	113	1
DES	c.1051G>A	0.216892	2	97	0	113	1
SHANK2	c.1795C>T	0.216892	2	97	0	113	1
ZNF560	c.1817G>A	0.216892	2	97	0	113	1
MBD5	c.2695C>T	0.216892	2	97	0	113	1
MAGEC1	c.1858G>A	0.216892	2	97	0	113	1
CYTIP	c.167G>A	0.216892	2	97	0	113	1
ADGRV1	c.16900C>T	0.216892	2	97	0	113	1
FPR1	c.487C>T	0.216892	2	97	0	113	1
SLC36A1	c.1412C>T	0.216892	2	97	0	113	1
ANKRD30BP2	n.1492G>A	0.216892	2	97	0	113	1
KCNJ6	c.16G>A	0.216892	2	97	0	113	1
DCC	c.*36G>A	0.216892	2	97	0	113	1
MECOM	c.692C>T	0.216892	2	97	0	113	1
OR10AG1	c.242G>A	0.216892	2	97	0	113	1
PAPPA2	c.3172G>A	0.216892	2	97	0	113	1
SLC2A10	c.779C>T	0.216892	2	97	0	113	1
IRF6	c.790G>A	0.216892	2	97	0	113	1
CYP2F1	c.83G>A	0.216892	2	97	0	113	1
IGKV2-24	c.50G>A	0.216892	2	97	0	113	1
DMD	c.4375C>T	0.216892	2	97	0	113	1
FBXO24	c.-49G>A	0.216892	2	97	0	113	1
PPP1R9A	c.2281G>A	0.216892	2	97	0	113	1
DRGX	c.742G>A	0.216892	2	97	0	113	1
FMN2	c.2240C>T	0.216892	2	97	0	113	1
LRP1	c.5410C>T	0.216892	2	97	0	113	1
TMEM217	c.491C>T	0.216892	2	97	0	113	1
SAGE1	c.368G>A	0.216892	2	97	0	113	1
ARRDC4	c.1244C>T	0.216892	2	97	0	113	1
LRRTM3	c.359G>A	0.216892	2	97	0	113	1
IGHV3-23	c.3G>A	0.216892	2	97	0	113	1
FAM46D	c.598C>T	0.216892	2	97	0	113	1
DOCK3	c.226G>A	0.216892	2	97	0	113	1
LINC01559	n.466G>A	0.216892	2	97	0	113	1
PAIP2	c.262C>T	0.216892	2	97	0	113	1
DNAH8		0.216892	2	97	0	113	1
TNR	c.787G>A	0.216892	2	97	0	113	1
TRAT1	c.226G>A	0.216892	2	97	0	113	1
SORL1	c.6633G>A	0.216892	2	97	0	113	1
PCDHGA2		0.216892	2	97	0	113	1
TTN	c.43216G>A	0.216892	2	97	0	113	1
TTN	c.25937G>A	0.216892	2	97	0	113	1
MBL2	c.293G>A	0.216892	2	97	0	113	1
ADAMTS2	c.2945G>A	0.216892	2	97	0	113	1
CDH8	c.2362G>A	0.216892	2	97	0	113	1
PAX2	c.796C>T	0.216892	2	97	0	113	1
PCDHB8	c.538C>T	0.216892	2	97	0	113	1
RNU6-354P		0.216892	2	97	0	113	1
PCDHB7	c.550G>A	0.216892	2	97	0	113	1
OR13G1	c.65G>A	0.216892	2	97	0	113	1
LAMA2	c.113-3C>T	0.216892	2	97	0	113	1
SPANXN1	c.*37G>A	0.216892	2	97	0	113	1
SEC14L3	c.199G>A	0.216892	2	97	0	113	1
CCDC158	c.1748G>A	0.216892	2	97	0	113	1
PTPRO	c.3475C>T	0.216892	2	97	0	113	1
RASGRP4	c.1984G>A	0.216892	2	97	0	113	1
PDE3A	c.2083C>T	0.216892	2	97	0	113	1
GLRB	c.706G>A	0.216892	2	97	0	113	1
SAMD9	c.4039C>T	0.216892	2	97	0	113	1
PIWIL1	c.1505G>A	0.216892	2	97	0	113	1
SLC7A13	c.89G>A	0.216892	2	97	0	113	1
PTEN	c.112C>T	0.216892	2	97	0	113	1
NACA2	c.291G>A	0.216892	2	97	0	113	1
CNTN6	c.2135G>A	0.216892	2	97	0	113	1
CHRNA9	c.139C>T	0.216892	2	97	0	113	1
FNDC1	c.1496G>A	0.216892	2	97	0	113	1
CDH4	c.2680G>A	0.216892	2	97	0	113	1
CATSPERB	c.1198C>T	0.216892	2	97	0	113	1
CD55	c.1001C>T	0.216892	2	97	0	113	1
XIRP2	c.6992G>A	0.216892	2	97	0	113	1
RAI2	c.440C>T	0.216892	2	97	0	113	1
C8A	c.555G>A	0.216892	2	97	0	113	1
ACSBG1	c.649G>A	0.216892	2	97	0	113	1
PIGV	c.353C>T	0.216892	2	97	0	113	1
SIGLEC8	c.1210G>A	0.216892	2	97	0	113	1
FAM19A4	c.*2G>A	0.216892	2	97	0	113	1
RGS7BP	c.425C>T	0.216892	2	97	0	113	1
ANKRD32	c.2021C>T	0.216892	2	97	0	113	1
MYLK	c.2944C>T	0.216892	2	97	0	113	1
TSHB	c.163G>A	0.216892	2	97	0	113	1
PLK1	c.977C>T	0.216892	2	97	0	113	1
HRSP12	c.313C>T	0.216892	2	97	0	113	1
GPRC6A	c.1654C>T	0.216892	2	97	0	113	1
HLA-DQB1	c.598G>A	0.216892	2	97	0	113	1
DCC	c.1469G>A	0.216892	2	97	0	113	1
PKP2	c.*42G>A	0.216892	2	97	0	113	1
FABP2	c.227G>A	0.216892	2	97	0	113	1
DAB1	c.-11G>A	0.216892	2	97	0	113	1
RBP3	c.250G>A	0.216892	2	97	0	113	1
SYNPO2	c.11G>A	0.216892	2	97	0	113	1
XIST	n.7251C>T	0.216892	2	97	0	113	1
B3GNTL1	c.455G>A	0.216892	2	97	0	113	1
SLC4A8	c.883C>T	0.216892	2	97	0	113	1
OR9K2	c.80G>A	0.216892	2	97	0	113	1
PCDHA8	c.1915G>A	0.216892	2	97	0	113	1
THSD7B	c.268G>A	0.216892	2	97	0	113	1
OR52N4	c.370C>T	0.216892	2	97	0	113	1
MUC16	c.1043C>T	0.216892	2	97	0	113	1
OR9K2	c.928C>T	0.216892	2	97	0	113	1
KCNH5	c.2651C>T	0.216892	2	97	0	113	1
TLL1	c.556G>A	0.216892	2	97	0	113	1
IGF2BP1	c.1354C>T	0.216892	2	97	0	113	1
UTP20	c.2164C>T	0.216892	2	97	0	113	1
SCN3A	c.5392G>A	0.216892	2	97	0	113	1
MS4A6E	c.265G>A	0.216892	2	97	0	113	1
SLITRK6	c.1493C>T	0.216892	2	97	0	113	1
SLC13A2	c.187C>T	0.216892	2	97	0	113	1
PAMR1	c.1081C>T	0.216892	2	97	0	113	1
NRAS	c.183A>C	0.216892	2	97	0	113	1
ATP13A5	c.2151G>A	0.216892	2	97	0	113	1
ZNF292	c.6400C>T	0.216892	2	97	0	113	1
ADHFE1	c.287C>T	0.216892	2	97	0	113	1
HHIPL2	c.881C>T	0.216892	2	97	0	113	1
TTN	c.22990C>T	0.216892	2	97	0	113	1
PMFBP1	c.1904G>A	0.216892	2	97	0	113	1
GPATCH2	c.1145C>T	0.216892	2	97	0	113	1
MYH1	c.2342G>A	0.216892	2	97	0	113	1
SORL1	c.3250C>T	0.216892	2	97	0	113	1
ST18	c.2227C>T	0.216892	2	97	0	113	1
SYT1	c.538C>T	0.216892	2	97	0	113	1
ADH7	c.436G>A	0.216892	2	97	0	113	1
SLC2A10	c.1186C>T	0.216892	2	97	0	113	1
RIPPLY2	c.329C>T	0.216892	2	97	0	113	1
CTSV	c.286C>T	0.216892	2	97	0	113	1
KLF14	c.*35G>A	0.216892	2	97	0	113	1
TPP2	c.859C>T	0.216892	2	97	0	113	1
SLC22A10	c.*112C>T	0.216892	2	97	0	113	1
ERC2	c.718C>T	0.216892	2	97	0	113	1
DSP	c.6635G>A	0.216892	2	97	0	113	1
PDE1A	c.407G>A	0.216892	2	97	0	113	1
ANXA13	c.32C>T	0.216892	2	97	0	113	1
PPARGC1A	c.781C>T	0.216892	2	97	0	113	1
NEK1	c.3035C>T	0.216892	2	97	0	113	1
CCDC181	c.1079G>A	0.216892	2	97	0	113	1
CYP2C18	c.595G>A	0.216892	2	97	0	113	1
OR10A4	c.589G>A	0.216892	2	97	0	113	1
HDAC9	c.499C>T	0.216892	2	97	0	113	1
SDPR	c.487G>A	0.216892	2	97	0	113	1
MUC16	c.13808G>A	0.216892	2	97	0	113	1
ACTL9	c.-31G>A	0.216892	2	97	0	113	1
TP63	c.1825G>A	0.216892	2	97	0	113	1
ZNF454	c.676C>T	0.216892	2	97	0	113	1
TLL1	c.1330C>T	0.216892	2	97	0	113	1
ARHGEF25	c.409-8C>T	0.216892	2	97	0	113	1
OR8D2	c.805G>A	0.216892	2	97	0	113	1
PAH	c.913G>A	0.216892	2	97	0	113	1
AFF4	c.1036C>T	0.216892	2	97	0	113	1
MANBA	c.*21C>T	0.216892	2	97	0	113	1
BBS9	c.2020C>T	0.216892	2	97	0	113	1
HFE2	c.986G>A	0.216892	2	97	0	113	1
ABCC12	c.2845C>T	0.216892	2	97	0	113	1
CMYA5	c.1909G>A	0.216892	2	97	0	113	1
CCDC13	c.860G>A	0.216892	2	97	0	113	1
MUC16	c.7208C>T	0.216892	2	97	0	113	1
MAGEA4	c.483G>A	0.216892	2	97	0	113	1
DNAH7	c.8882G>A	0.216892	2	97	0	113	1
PRPS1L1	c.367C>T	0.216892	2	97	0	113	1
POM121L12	c.*10C>T	0.216892	2	97	0	113	1
CTIF	c.1564C>T	0.216892	2	97	0	113	1
DNM3	c.1099C>T	0.216892	2	97	0	113	1
NPAS4	c.2173G>A	0.216892	2	97	0	113	1
CARD11	c.2266G>A	0.216892	2	97	0	113	1
GPR139	c.649C>T	0.216892	2	97	0	113	1
OR5H6	c.912G>A	0.216892	2	97	0	113	1
GPR55	c.591G>A	0.216892	2	97	0	113	1
NLGN4X	c.2158G>A	0.216892	2	97	0	113	1
ARHGAP36	c.17C>T	0.216892	2	97	0	113	1
SOX14	c.133G>A	0.216892	2	97	0	113	1
SLITRK4	c.1729G>A	0.216892	2	97	0	113	1
CYP4A11	c.1501G>A	0.216892	2	97	0	113	1
UNK	c.367C>T	0.216892	2	97	0	113	1
GART	c.1904C>T	0.216892	2	97	0	113	1
MYO7A	c.6439-1G>A	0.216892	2	97	0	113	1
EPHA8	c.272G>A	0.216892	2	97	0	113	1
SLC5A8	c.382C>T	0.216892	2	97	0	113	1
FUBP1	c.793C>T	0.216892	2	97	0	113	1
VIL1	c.637G>A	0.216892	2	97	0	113	1
PRAMEF2	c.880C>T	0.216892	2	97	0	113	1
ATP2B2	c.2330G>A	0.216892	2	97	0	113	1
PDE6C	c.-76C>T	0.216892	2	97	0	113	1
IQCJ-SCHIP1	c.-28C>T	0.216892	2	97	0	113	1
CPED1	c.2635G>A	0.216892	2	97	0	113	1
ZFP42	c.419C>T	0.216892	2	97	0	113	1
CDKL5	c.2623C>T	0.216892	2	97	0	113	1
NLRP5	c.2101C>T	0.216892	2	97	0	113	1
SIRPB1	c.94G>A	0.216892	2	97	0	113	1
ZNF557	c.977C>T	0.216892	2	97	0	113	1
GRID2	c.1034G>A	0.216892	2	97	0	113	1
KLK8	c.231G>A	0.216892	2	97	0	113	1
TTN	c.99682G>A	0.216892	2	97	0	113	1
TRHDE	c.2811G>A	0.216892	2	97	0	113	1
COL13A1	c.623G>A	0.216892	2	97	0	113	1
OR11H6	c.739C>T	0.216892	2	97	0	113	1
UNC119B	c.664C>T	0.216892	2	97	0	113	1
PCDHB5	c.1663G>A	0.216892	2	97	0	113	1
FILIP1	c.544G>A	0.216892	2	97	0	113	1
IL18	c.574G>A	0.216892	2	97	0	113	1
IGKV2-24	c.53C>T	0.216892	2	97	0	113	1
BRINP3	c.1768G>A	0.216892	2	97	0	113	1
ZFPM2	c.856G>A	0.216892	2	97	0	113	1
UBE2J2	c.481C>T	0.216892	2	97	0	113	1
EPHA6	c.1057C>T	0.216892	2	97	0	113	1
HNF4G	c.967G>A	0.216892	2	97	0	113	1
IQCA1	c.1286G>A	0.216892	2	97	0	113	1
CD163	c.748C>T	0.216892	2	97	0	113	1
KCNG4	c.612G>A	0.216892	2	97	0	113	1
COL11A1	c.829G>A	0.216892	2	97	0	113	1
NOBOX	c.292+3G>A	0.216892	2	97	0	113	1
ATP8B2	c.2747C>T	0.216892	2	97	0	113	1
C1orf106	c.832G>A	0.216892	2	97	0	113	1
PCLO	c.4783G>A	0.216892	2	97	0	113	1
SIGLEC12	c.377G>A	0.216892	2	97	0	113	1
OR6V1	c.25G>A	0.216892	2	97	0	113	1
RP11-85G18.6		0.216892	2	97	0	113	1
UGT2B4	c.133G>A	0.216892	2	97	0	113	1
DAW1	c.58G>A	0.216892	2	97	0	113	1
WFDC8	c.14G>A	0.216892	2	97	0	113	1
PDE4DIP	c.1288C>T	0.216892	2	97	0	113	1
LILRB2	c.527C>T	0.216892	2	97	0	113	1
OR6C6	c.722C>T	0.216892	2	97	0	113	1
SORCS3	c.3451C>T	0.216892	2	97	0	113	1
OR9Q1	c.800C>T	0.216892	2	97	0	113	1
AP4S1	c.-54C>T	0.216892	2	97	0	113	1
SPG11	c.992C>T	0.216892	2	97	0	113	1
LRRK2	c.3848C>T	0.216892	2	97	0	113	1
FMR1NB	c.634G>A	0.216892	2	97	0	113	1
PCDHB12	c.182C>T	0.216892	2	97	0	113	1
RIT2	c.355C>T	0.216892	2	97	0	113	1
AKAP4	c.653C>T	0.216892	2	97	0	113	1
C6orf10	c.1177G>A	0.216892	2	97	0	113	1
PAPLN	c.1157C>T	0.216892	2	97	0	113	1
RGP1		0.216892	2	97	0	113	1
MYF5	c.79G>A	0.216892	2	97	0	113	1
COL15A1	c.161C>T	0.216892	2	97	0	113	1
OR4S2	c.358C>T	0.216892	2	97	0	113	1
CNTNAP2	c.615G>A	0.216892	2	97	0	113	1
SLC15A2	c.1093C>T	0.216892	2	97	0	113	1
AGAP7P	n.1682G>A	0.216892	2	97	0	113	1
GUCY1A2	c.2135C>T	0.216892	2	97	0	113	1
CNTNAP5	c.1186C>T	0.216892	2	97	0	113	1
DBF4B	c.1717C>T	0.216892	2	97	0	113	1
UGT1A5	c.262G>A	0.216892	2	97	0	113	1
HERC2P3	n.829G>A	0.216892	2	97	0	113	1
BPIFB1	c.319G>A	0.216892	2	97	0	113	1
PCLO	c.3772G>A	0.216892	2	97	0	113	1
SLC27A2	c.650C>T	0.216892	2	97	0	113	1
SUN5	c.460G>A	0.216892	2	97	0	113	1
DNAH9	c.4732G>A	0.216892	2	97	0	113	1
IMPDH1	c.*120C>T	0.216892	2	97	0	113	1
USP6NL	c.1846C>T	0.216892	2	97	0	113	1
SPANXB1	c.283G>A	0.216892	2	97	0	113	1
ZNF229	c.2039G>A	0.216892	2	97	0	113	1
RYR2	c.12409G>A	0.216892	2	97	0	113	1
HTRA4	c.1061C>T	0.216892	2	97	0	113	1
ADGRV1	c.9439C>T	0.216892	2	97	0	113	1
PRR23B	c.328G>A	0.216892	2	97	0	113	1
DNAH7	c.3832C>T	0.216892	2	97	0	113	1
SPATA17	c.322C>T	0.216892	2	97	0	113	1
NPHS1	c.3554C>T	0.216892	2	97	0	113	1
OR5H6	c.95G>A	0.216892	2	97	0	113	1
KRT32	c.292G>A	0.216892	2	97	0	113	1
MUC16	c.21373C>T	0.216892	2	97	0	113	1
ZBTB33	c.1753C>T	0.216892	2	97	0	113	1
ADAMTS20	c.4480C>T	0.216892	2	97	0	113	1
C8A	c.505G>A	0.216892	2	97	0	113	1
PARGP1	n.1250C>T	0.216892	2	97	0	113	1
CSMD2	c.3430G>A	0.216892	2	97	0	113	1
RSPH6A	c.1525G>A	0.216892	2	97	0	113	1
FMO2	c.1420C>T	0.216892	2	97	0	113	1
PRPS1L1	c.919G>A	0.216892	2	97	0	113	1
TRBV30	c.284C>T	0.216892	2	97	0	113	1
SEZ6L	c.1822G>A	0.216892	2	97	0	113	1
KAL1	c.2036G>A	0.216892	2	97	0	113	1
UGT3A1	c.211G>A	0.216892	2	97	0	113	1
SH3RF2	c.899C>T	0.216892	2	97	0	113	1
AGR3	c.79G>A	0.216892	2	97	0	113	1
TBX5	c.691C>T	0.216892	2	97	0	113	1
PAK7	c.1100C>T	0.216892	2	97	0	113	1
UBE2NL	n.136C>T	0.216892	2	97	0	113	1
CPAMD8	c.3491G>A	0.216892	2	97	0	113	1
VPS53	c.670C>T	0.216892	2	97	0	113	1
TENM1	c.7984G>A	0.216892	2	97	0	113	1
PAPPA2	c.4159C>T	0.216892	2	97	0	113	1
FBXW10	c.757G>A	0.216892	2	97	0	113	1
LRRC4C	c.874C>T	0.216892	2	97	0	113	1
TTN	c.57040G>A	0.216892	2	97	0	113	1
OR5T1	c.236C>T	0.216892	2	97	0	113	1
TMEM132B	c.2158C>T	0.216892	2	97	0	113	1
PCLO	c.964G>A	0.216892	2	97	0	113	1
MECOM	c.301G>A	0.216892	2	97	0	113	1
CARS	c.1894C>T	0.216892	2	97	0	113	1
NLRP13	c.788C>T	0.216892	2	97	0	113	1
CDX4		0.216892	2	97	0	113	1
PCED1B	c.421G>A	0.216892	2	97	0	113	1
PCDH11X	c.277C>T	0.216892	2	97	0	113	1
RPTOR	c.3986C>T	0.216892	2	97	0	113	1
COLEC12	c.703C>T	0.216892	2	97	0	113	1
TINAG	c.137G>A	0.216892	2	97	0	113	1
F8	c.4582G>A	0.216892	2	97	0	113	1
DNAH6	c.1673C>T	0.216892	2	97	0	113	1
GPC5	c.910G>A	0.216892	2	97	0	113	1
SYT10	c.958G>A	0.216892	2	97	0	113	1
MRPL53	c.-17C>T	0.216892	2	97	0	113	1
NPHP1	c.1036C>T	0.216892	2	97	0	113	1
ZNF385A	c.733G>A	0.216892	2	97	0	113	1
TCEB3B	c.1303G>A	0.216892	2	97	0	113	1
SYN1	c.1187G>A	0.216892	2	97	0	113	1
KY	c.1879G>A	0.216892	2	97	0	113	1
PLAC8L1	c.443C>T	0.216892	2	97	0	113	1
PTPRT	c.4273G>A	0.216892	2	97	0	113	1
ZNF695	c.1204C>T	0.216892	2	97	0	113	1
CDK4	c.65A>T	0.216892	2	97	0	113	1
ZBTB20	c.752C>T	0.216892	2	97	0	113	1
GRM6	c.2492C>T	0.216892	2	97	0	113	1
MIA3	c.1966C>T	0.216892	2	97	0	113	1
TRIOBP	c.3319C>T	0.216892	2	97	0	113	1
OR11H12	c.409C>T	0.216892	2	97	0	113	1
RPRD2	c.968C>T	0.216892	2	97	0	113	1
NLRP4	c.1675G>A	0.216892	2	97	0	113	1
C6orf118	c.469G>A	0.216892	2	97	0	113	1
HIVEP3	c.3295C>T	0.216892	2	97	0	113	1
PTPRD	c.4180C>T	0.216892	2	97	0	113	1
PCDHB3	c.2221G>A	0.216892	2	97	0	113	1
ZNF488	c.151G>A	0.216892	2	97	0	113	1
PSMB2	c.277C>T	0.216892	2	97	0	113	1
ABCA3	c.1024G>A	0.216892	2	97	0	113	1
FAM47B	c.1930G>A	0.216892	2	97	0	113	1
CSMD1	c.9871G>A	0.216892	2	97	0	113	1
KCNH1	c.2948G>A	0.216892	2	97	0	113	1
TRIM49	c.1229G>A	0.216892	2	97	0	113	1
WBSCR17	c.865G>A	0.216892	2	97	0	113	1
POTEA	n.1389G>A	0.216892	2	97	0	113	1
A2M	c.457G>A	0.216892	2	97	0	113	1
MAGEB6P1	n.359C>T	0.216892	2	97	0	113	1
AC015849.16	n.3713G>A	0.216892	2	97	0	113	1
HS6ST3	c.708G>A	0.216892	2	97	0	113	1
HAO2	c.1027C>T	0.216892	2	97	0	113	1
KCNS2	c.1016G>A	0.216892	2	97	0	113	1
OR2J2	c.547C>T	0.216892	2	97	0	113	1
DCAF8L1	c.238G>A	0.216892	2	97	0	113	1
KCNB2	c.56C>T	0.216892	2	97	0	113	1
SHROOM4	c.3101C>T	0.216892	2	97	0	113	1
DNAH5	c.5297C>T	0.216892	2	97	0	113	1
BVES	c.958C>T	0.216892	2	97	0	113	1
ANK3	c.11272G>A	0.216892	2	97	0	113	1
LRIG3	c.380C>T	0.216892	2	97	0	113	1
FKBP5	c.344C>T	0.216892	2	97	0	113	1
MYCT1	c.446C>T	0.216892	2	97	0	113	1
PCNXL2	c.3250C>T	0.216892	2	97	0	113	1
SF3B1	c.1873C>T	0.216892	2	97	0	113	1
TRIM51HP	n.67C>T	0.216892	2	97	0	113	1
FCRL5	c.511G>A	0.216892	2	97	0	113	1
SLC5A8	c.1507C>T	0.216892	2	97	0	113	1
PCDHA2	c.1348G>A	0.216892	2	97	0	113	1
SLC2A7	c.775G>A	0.216892	2	97	0	113	1
MAGEC1	c.2071C>T	0.216892	2	97	0	113	1
DPY19L2P1	n.854G>A	0.216892	2	97	0	113	1
GLRB	c.417G>A	0.216892	2	97	0	113	1
SNORD116-4	n.34C>T	0.216892	2	97	0	113	1
HLA-DPA3		0.216892	2	97	0	113	1
CDCP1	c.1586C>T	0.216892	2	97	0	113	1
OR4K5	c.200C>T	0.216892	2	97	0	113	1
HSD11B1	c.205G>A	0.216892	2	97	0	113	1
DRC7	c.712G>A	0.216892	2	97	0	113	1
TRIML2	c.1076C>T	0.216892	2	97	0	113	1
USP26	c.2146C>T	0.216892	2	97	0	113	1
TMC5	c.398G>A	0.216892	2	97	0	113	1
IGKV1-27	c.32G>A	0.216892	2	97	0	113	1
ITGA5	c.1792C>T	0.216892	2	97	0	113	1
VCAN	c.10109C>T	0.216892	2	97	0	113	1
FLG	c.11323G>A	0.216892	2	97	0	113	1
HLA-DRA	c.442C>T	0.216892	2	97	0	113	1
FRG2C	c.443G>A	0.216892	2	97	0	113	1
CACNA1A	c.1246C>T	0.216892	2	97	0	113	1
ACTG1	c.842C>T	0.216892	2	97	0	113	1
MUC16	c.21709C>T	0.216892	2	97	0	113	1
THSD7B	c.4417C>T	0.216892	2	97	0	113	1
CHI3L1	c.988G>A	0.216892	2	97	0	113	1
CNDP1	c.556G>A	0.216892	2	97	0	113	1
KL	c.1085G>A	0.216892	2	97	0	113	1
NOS1	c.512C>T	0.216892	2	97	0	113	1
GYPB	c.256C>T	0.216892	2	97	0	113	1
TMPO	c.805C>T	0.216892	2	97	0	113	1
SPTA1	c.5119G>A	0.216892	2	97	0	113	1
MUC17	c.11431G>A	0.216892	2	97	0	113	1
DNAH5	c.7839G>A	0.216892	2	97	0	113	1
CDSN	c.1013C>T	0.216892	2	97	0	113	1
BRINP2	c.1297C>T	0.216892	2	97	0	113	1
CCDC70	c.-4C>T	0.216892	2	97	0	113	1
TRERF1	c.578C>T	0.216892	2	97	0	113	1
ZNF136	c.1469C>T	0.216892	2	97	0	113	1
ABCA4	c.5887C>T	0.216892	2	97	0	113	1
SERPINB5	c.551C>T	0.216892	2	97	0	113	1
VWF	c.6321G>A	0.216892	2	97	0	113	1
GFRAL	c.46G>A	0.216892	2	97	0	113	1
ADGRG4	c.3256C>T	0.216892	2	97	0	113	1
FLG	c.5393G>A	0.216892	2	97	0	113	1
ZNF2	c.193C>T	0.216892	2	97	0	113	1
PTPRD	c.1216G>A	0.216892	2	97	0	113	1
CNGA2	c.375G>A	0.216892	2	97	0	113	1
CDH6	c.1571C>T	0.218265	1	98	5	108	1
CBLN2	c.667C>T	0.249732	0	99	3	110	1
ISX	c.256C>T	0.249732	0	99	3	110	1
DNAH5	c.10615C>T	0.249732	0	99	3	110	1
SPANXB1	c.214G>A	0.249732	0	99	3	110	1
KIT	c.1924A>G	0.249732	0	99	3	110	1
LSG1	c.-73C>T	0.249732	0	99	3	110	1
SAMD9	c.4529C>T	0.249732	0	99	3	110	1
CSMD3	c.5822G>A	0.249732	0	99	3	110	1
FAM65C	c.805G>A	0.249732	0	99	3	110	1
BRINP2	c.311G>A	0.249732	0	99	3	110	1
NGDN	c.-17G>A	0.249732	0	99	3	110	1
MXRA5	c.6016G>A	0.249732	0	99	3	110	1
PCDHGA1	c.877C>T	0.249732	0	99	3	110	1
CTNNA2	c.2816C>T	0.249732	0	99	3	110	1
HYDIN	c.160G>A	0.249732	0	99	3	110	1
OXA1L	c.169C>T	0.249732	0	99	3	110	1
UGT1A4	c.262G>A	0.249732	0	99	3	110	1
DNAH5	c.8020G>A	0.249732	0	99	3	110	1
COL21A1	c.1529G>A	0.249732	0	99	3	110	1
SERBP1		0.249732	0	99	3	110	1
KRT6C	c.1161G>A	0.249732	0	99	3	110	1
GRM7	c.1717C>T	0.249732	0	99	3	110	1
CAPN13	c.1213C>T	0.249732	0	99	3	110	1
TRAV5	c.268G>A	0.249732	0	99	3	110	1
NPAP1	c.1583C>T	0.249732	0	99	3	110	1
BMP6	c.*72G>A	0.249732	0	99	3	110	1
C10orf53	c.*22G>A	0.249732	0	99	3	110	1
EIF3IP1	n.745G>A	0.249732	0	99	3	110	1
MYH4	c.871C>T	0.249732	0	99	3	110	1
OR2T11	c.641C>T	0.249732	0	99	3	110	1
OXA1L	c.172C>T	0.249732	0	99	3	110	1
NME8	c.752G>A	0.249732	0	99	3	110	1
OTOGL	c.4660G>A	0.249732	0	99	3	110	1
NDUFA13	c.-21G>A	0.249732	0	99	3	110	1
ACSM2B	c.1390G>A	0.249732	0	99	3	110	1
SMURF2	c.1279C>T	0.249732	0	99	3	110	1
KIT	c.1676T>C	0.249732	0	99	3	110	1
SCN10A	c.3715G>A	0.249732	0	99	3	110	1
COL25A1	c.1204C>T	0.249732	0	99	3	110	1
TRHR	c.10G>A	0.249732	0	99	3	110	1
ZBBX	c.628G>A	0.249732	0	99	3	110	1
GABRA2	c.1083G>A	0.249732	0	99	3	110	1
ADAM32	c.1831C>T	0.249732	0	99	3	110	1
PCDHB4	c.925G>A	0.249732	0	99	3	110	1
LAD1	c.1342G>A	0.249732	0	99	3	110	1
IMPG1	c.1237C>T	0.249732	0	99	3	110	1
RUNX1T1	c.712G>A	0.249732	0	99	3	110	1
SLFN11	c.622C>T	0.249732	0	99	3	110	1
ASXL3	c.4108C>T	0.249732	0	99	3	110	1
MORC1	c.2500C>T	0.249732	0	99	3	110	1
HCG4B	n.423C>T	0.249732	0	99	3	110	1
NLRP4	c.1073G>A	0.249732	0	99	3	110	1
EGFLAM	c.1658G>A	0.249732	0	99	3	110	1
ASXL3	c.1357G>A	0.249732	0	99	3	110	1
TMEM200A	c.1049C>T	0.249732	0	99	3	110	1
C1orf61	c.445C>T	0.249732	0	99	3	110	1
TMEM132B	c.343C>T	0.249732	0	99	3	110	1
DPYD	c.2276G>A	0.249732	0	99	3	110	1
WDR91		0.249732	0	99	3	110	1
TUSC3	c.1000C>T	0.249732	0	99	3	110	1
C10orf12	c.2797C>T	0.249732	0	99	3	110	1
PDZRN4	c.1688G>A	0.249732	0	99	3	110	1
TTN	c.9812C>T	0.249732	0	99	3	110	1
HERC1	c.9667C>T	0.249732	0	99	3	110	1
GABRA6	c.64G>A	0.249732	0	99	3	110	1
FER1L6	c.1247C>T	0.249732	0	99	3	110	1
ZNF12	c.631C>T	0.249732	0	99	3	110	1
CSMD1	c.3229C>T	0.249732	0	99	3	110	1
OR2A25	c.-3G>A	0.249732	0	99	3	110	1
RBP3	c.-25G>A	0.249732	0	99	3	110	1
RUNX1T1	c.496C>T	0.249732	0	99	3	110	1
POTEA	n.1290G>A	0.249732	0	99	3	110	1
ZNF585B	c.1226C>T	0.249732	0	99	3	110	1
IL37	c.605C>T	0.249732	0	99	3	110	1
FAM175B		0.249732	0	99	3	110	1
LRP1B	c.11620C>T	0.249732	0	99	3	110	1
NDUFB9	c.-84C>T	0.249732	0	99	3	110	1
TDRKH	c.1114C>T	0.249732	0	99	3	110	1
RP11-335F8.2	n.249C>T	0.249732	0	99	3	110	1
DSCAM	c.4750G>A	0.249732	0	99	3	110	1
DSCAM	c.1102G>A	0.249732	0	99	3	110	1
F13B	c.*142C>T	0.249732	0	99	3	110	1
SPRR2G	c.46C>T	0.249732	0	99	3	110	1
VSTM4	c.391G>A	0.249732	0	99	3	110	1
CSMD3	c.299G>A	0.249732	0	99	3	110	1
FAM135B	c.3574G>A	0.249732	0	99	3	110	1
BCL2L12	c.52C>T	0.249732	0	99	3	110	1
TIGIT	c.304G>A	0.249732	0	99	3	110	1
MIR1270		0.249732	0	99	3	110	1
PRSS37	c.*91G>A	0.249732	0	99	3	110	1
PAK7	c.*11C>T	0.249732	0	99	3	110	1
MYOM1	c.2839C>T	0.249732	0	99	3	110	1
PCDHA11	c.914G>A	0.249732	0	99	3	110	1
NGDN	c.-18G>A	0.249732	0	99	3	110	1
DSCAM	c.2311G>A	0.249732	0	99	3	110	1
PKHD1L1	c.7127G>A	0.249732	0	99	3	110	1
DPM2	c.-61G>A	0.249732	0	99	3	110	1
CCDC102B	c.1099G>A	0.249732	0	99	3	110	1
POM121L12	c.563G>A	0.249732	0	99	3	110	1
USP19	c.2209C>T	0.249732	0	99	3	110	1
RQCD1	c.392C>T	0.255526	5	94	2	111	1
KLHDC7A	c.1903G>A	0.341391	3	96	1	112	1
GRIN2A	c.3965G>A	0.341391	3	96	1	112	1
CNTNAP2	c.1085G>A	0.341391	3	96	1	112	1
OR51S1	c.721C>T	0.341391	3	96	1	112	1
GRIN2B	c.*96C>T	0.341391	3	96	1	112	1
PAK7	c.1091C>T	0.341391	3	96	1	112	1
CAPZA3	c.407G>A	0.341391	3	96	1	112	1
ASH1L	c.6232C>T	0.341391	3	96	1	112	1
MAP2K1	c.370C>T	0.341391	3	96	1	112	1
PENK	c.458C>T	0.341391	3	96	1	112	1
TTN	c.12739G>A	0.341391	3	96	1	112	1
CRNKL1	c.383C>T	0.341391	3	96	1	112	1
XIRP2	c.1966G>A	0.341391	3	96	1	112	1
HBD	c.142G>A	0.374577	1	98	4	109	1
CNTN5	c.1136C>T	0.374577	1	98	4	109	1
EYA1	c.614C>T	0.374577	1	98	4	109	1
THSD7B	c.3538G>A	0.374577	1	98	4	109	1
TP63	c.1135C>T	0.374577	1	98	4	109	1
PCDH15	c.2290C>T	0.374577	1	98	4	109	1
DNAH7	c.2302C>T	0.374577	1	98	4	109	1
TRRAP	c.2165C>T	0.374577	1	98	4	109	1
SCGB1C1	c.68G>A	0.466981	1	98	0	113	1
DSCAM	c.1775C>T	0.466981	1	98	0	113	1
SPAM1	c.640C>T	0.466981	1	98	0	113	1
ARHGAP35	c.2767C>T	0.466981	1	98	0	113	1
ANK3	c.1825G>A	0.466981	1	98	0	113	1
ZNF665	c.-12G>A	0.466981	1	98	0	113	1
IFNA6	c.224A>C	0.466981	1	98	0	113	1
C14orf1	c.*103C>T	0.466981	1	98	0	113	1
SEMA3A	c.1112G>A	0.466981	1	98	0	113	1
IQCF3	c.422C>T	0.466981	1	98	0	113	1
ADNP2	c.260C>T	0.466981	1	98	0	113	1
SLCO6A1	c.358G>A	0.466981	1	98	0	113	1
PEAK1	c.3173C>T	0.466981	1	98	0	113	1
BPIFB4	c.659C>T	0.466981	1	98	0	113	1
C5	c.3616C>T	0.466981	1	98	0	113	1
RGS18	c.86G>A	0.466981	1	98	0	113	1
KLK7	c.560C>T	0.466981	1	98	0	113	1
TGM2	c.-2C>T	0.466981	1	98	0	113	1
SEC14L4	c.232G>A	0.466981	1	98	0	113	1
ECE1	c.787C>T	0.466981	1	98	0	113	1
HIVEP3	c.317C>T	0.466981	1	98	0	113	1
KIF21B	c.3704G>A	0.466981	1	98	0	113	1
CTGLF12P	n.1691G>A	0.466981	1	98	0	113	1
PCDHGA6	c.659C>T	0.466981	1	98	0	113	1
RPE65	c.362C>T	0.466981	1	98	0	113	1
TMEM147	c.-50G>A	0.466981	1	98	0	113	1
ZNF266	c.485G>A	0.466981	1	98	0	113	1
IGHV3-21	c.159G>A	0.466981	1	98	0	113	1
AL591893.1	n.2662C>T	0.466981	1	98	0	113	1
SAMD4A	c.2012C>T	0.466981	1	98	0	113	1
PLEKHA8P1	n.684C>T	0.466981	1	98	0	113	1
CACNA1E	c.3235C>T	0.466981	1	98	0	113	1
KYNU	c.95A>C	0.466981	1	98	0	113	1
A2ML1	c.803G>A	0.466981	1	98	0	113	1
MRGPRX4	c.869T>C	0.466981	1	98	0	113	1
OR1S1	c.930G>A	0.466981	1	98	0	113	1
ULK1	c.1601C>T	0.466981	1	98	0	113	1
OR51F1	c.848C>T	0.466981	1	98	0	113	1
RP11-407N17.3	c.3458C>T	0.466981	1	98	0	113	1
CDH18	c.430G>A	0.466981	1	98	0	113	1
LRP4	c.514G>A	0.466981	1	98	0	113	1
SRCAP	c.2005C>T	0.466981	1	98	0	113	1
MTTP	c.1694G>C	0.466981	1	98	0	113	1
CIITA	c.1336G>A	0.466981	1	98	0	113	1
SCUBE3	c.2455A>T	0.466981	1	98	0	113	1
CDON	c.2144C>T	0.466981	1	98	0	113	1
CCDC64	c.1360C>T	0.466981	1	98	0	113	1
PKDREJ	c.4555C>T	0.466981	1	98	0	113	1
ARHGEF1	c.485T>C	0.466981	1	98	0	113	1
GBE1	c.1274C>T	0.466981	1	98	0	113	1
TIGD3	c.1378G>A	0.466981	1	98	0	113	1
RERE	c.3817C>T	0.466981	1	98	0	113	1
MAP1A	c.6616C>T	0.466981	1	98	0	113	1
PARM1	c.*25G>A	0.466981	1	98	0	113	1
EPHA3	c.2056G>A	0.466981	1	98	0	113	1
COL21A1	c.470C>T	0.466981	1	98	0	113	1
TP53	c.524G>A	0.466981	1	98	0	113	1
MUM1L1	c.679G>A	0.466981	1	98	0	113	1
ZNF560	c.727G>A	0.466981	1	98	0	113	1
YME1L1	c.76C>T	0.466981	1	98	0	113	1
COL9A3	c.218C>T	0.466981	1	98	0	113	1
OR7C2	c.538G>A	0.466981	1	98	0	113	1
AK9	c.3319C>T	0.466981	1	98	0	113	1
NCKAP1L	c.3341G>A	0.466981	1	98	0	113	1
RYR2	c.6965G>A	0.466981	1	98	0	113	1
MUC3A	c.7469G>A	0.466981	1	98	0	113	1
SPINK13	c.250C>T	0.466981	1	98	0	113	1
COL4A1	c.677G>A	0.466981	1	98	0	113	1
LY9	c.1577G>A	0.466981	1	98	0	113	1
SH2D5	c.798C>T	0.466981	1	98	0	113	1
IL2RG	c.*80G>A	0.466981	1	98	0	113	1
ZYX	c.1504C>T	0.466981	1	98	0	113	1
WFDC8	c.454G>A	0.466981	1	98	0	113	1
TSHZ2	c.628A>G	0.466981	1	98	0	113	1
BRAF	c.1720C>T	0.466981	1	98	0	113	1
ARID2	c.2408G>A	0.466981	1	98	0	113	1
SBNO2	c.418C>T	0.466981	1	98	0	113	1
EIF2AK2	c.-156C>T	0.466981	1	98	0	113	1
CPNE2	c.1615A>G	0.466981	1	98	0	113	1
PRUNE2	c.2830T>C	0.466981	1	98	0	113	1
SLC22A7	c.691G>A	0.466981	1	98	0	113	1
COL6A6	c.1972C>T	0.466981	1	98	0	113	1
ASAH2	c.1387G>A	0.466981	1	98	0	113	1
GOT2	c.400G>T	0.466981	1	98	0	113	1
SERPIND1	c.*65G>A	0.466981	1	98	0	113	1
SEZ6	c.2274G>A	0.466981	1	98	0	113	1
ST6GALNAC6	c.889C>T	0.466981	1	98	0	113	1
COL6A2	c.2197G>A	0.466981	1	98	0	113	1
MAP4K4	c.1985G>A	0.466981	1	98	0	113	1
DDX41	c.*18C>T	0.466981	1	98	0	113	1
TRRAP	c.7712C>T	0.466981	1	98	0	113	1
DYNC1H1	c.8842C>T	0.466981	1	98	0	113	1
ZCWPW1	c.784C>T	0.466981	1	98	0	113	1
GTF2IRD2P1	n.1164G>A	0.466981	1	98	0	113	1
ALKBH4	c.*32C>T	0.466981	1	98	0	113	1
IL1RL2	c.47C>T	0.466981	1	98	0	113	1
SEC23IP	c.1069C>T	0.466981	1	98	0	113	1
TNFRSF11B	c.97G>A	0.466981	1	98	0	113	1
HM13	c.365G>A	0.466981	1	98	0	113	1
PLEKHG5	c.1837G>A	0.466981	1	98	0	113	1
CPO	c.616G>A	0.466981	1	98	0	113	1
ADAM18	c.508C>T	0.466981	1	98	0	113	1
TTN	c.9166C>T	0.466981	1	98	0	113	1
MPP2	c.814G>A	0.466981	1	98	0	113	1
DSG4	c.2389C>T	0.466981	1	98	0	113	1
GUCY2F	c.2933G>A	0.466981	1	98	0	113	1
IGSF1	c.1799T>G	0.466981	1	98	0	113	1
TTN	c.21991G>A	0.466981	1	98	0	113	1
C5orf42	c.8665A>G	0.466981	1	98	0	113	1
SH3BP2	c.1391C>T	0.466981	1	98	0	113	1
DYNLL2	c.223T>C	0.466981	1	98	0	113	1
MUC16	c.31502C>T	0.466981	1	98	0	113	1
ABCC3	c.2677G>A	0.466981	1	98	0	113	1
CRCT1	c.41C>T	0.466981	1	98	0	113	1
MYH11	c.2469C>G	0.466981	1	98	0	113	1
HCP5	n.933C>T	0.466981	1	98	0	113	1
MYLK2	c.232G>A	0.466981	1	98	0	113	1
TLR7	c.3055C>T	0.466981	1	98	0	113	1
GRXCR1	c.479G>A	0.466981	1	98	0	113	1
LRRN2	c.2069G>A	0.466981	1	98	0	113	1
DSC1	c.2219G>A	0.466981	1	98	0	113	1
SSX6	n.199T>G	0.466981	1	98	0	113	1
CCDC57	c.*38G>A	0.466981	1	98	0	113	1
TLR5	c.584G>A	0.466981	1	98	0	113	1
PDE1A	c.237T>G	0.466981	1	98	0	113	1
PDE9A	c.664C>T	0.466981	1	98	0	113	1
OR2B3	c.794C>T	0.466981	1	98	0	113	1
GRID2	c.1459G>A	0.466981	1	98	0	113	1
PBRM1	c.1082T>A	0.466981	1	98	0	113	1
KCNA6	c.604G>A	0.466981	1	98	0	113	1
ROS1	c.2045A>G	0.466981	1	98	0	113	1
TPGS2	c.200A>G	0.466981	1	98	0	113	1
IGHG3	c.226G>A	0.466981	1	98	0	113	1
ZNF648	c.442G>A	0.466981	1	98	0	113	1
STOX2	c.887C>T	0.466981	1	98	0	113	1
OR4K1	c.532T>C	0.466981	1	98	0	113	1
PNCK	c.197G>A	0.466981	1	98	0	113	1
CHRD	c.893G>A	0.466981	1	98	0	113	1
CSMD2	c.1786G>A	0.466981	1	98	0	113	1
CHD2	c.583C>T	0.466981	1	98	0	113	1
VEZF1	c.1435C>T	0.466981	1	98	0	113	1
GBP6	c.349G>T	0.466981	1	98	0	113	1
SENP1	c.466C>T	0.466981	1	98	0	113	1
FBLN7	c.965C>T	0.466981	1	98	0	113	1
CTNNA2	c.8C>T	0.466981	1	98	0	113	1
BCO1	c.1027G>A	0.466981	1	98	0	113	1
ARFGEF3	c.872C>T	0.466981	1	98	0	113	1
RNA5SP206		0.466981	1	98	0	113	1
RGS22	c.1946C>T	0.466981	1	98	0	113	1
BIN2	c.1474C>T	0.466981	1	98	0	113	1
ANKS1A	c.2185G>A	0.466981	1	98	0	113	1
ARFGEF3	c.4226C>T	0.466981	1	98	0	113	1
LRRC4B	c.*75C>T	0.466981	1	98	0	113	1
LIMCH1	c.3097C>T	0.466981	1	98	0	113	1
RHOU	c.325G>A	0.466981	1	98	0	113	1
CCDC141	c.2527C>A	0.466981	1	98	0	113	1
MYL1	c.-93C>T	0.466981	1	98	0	113	1
KIR2DL1	c.622G>A	0.466981	1	98	0	113	1
TRANK1	c.1824C>A	0.466981	1	98	0	113	1
LRCH4	c.733C>T	0.466981	1	98	0	113	1
FRMPD2	c.-83G>A	0.466981	1	98	0	113	1
CRX	c.440C>T	0.466981	1	98	0	113	1
GABRA1	c.*17C>T	0.466981	1	98	0	113	1
STAT3	c.238C>T	0.466981	1	98	0	113	1
PTPN12	c.2260C>T	0.466981	1	98	0	113	1
CDH6	c.805C>T	0.466981	1	98	0	113	1
CYLD	c.1438G>A	0.466981	1	98	0	113	1
OR4K5	c.586G>A	0.466981	1	98	0	113	1
TNFAIP6	c.643C>T	0.466981	1	98	0	113	1
MAATS1	c.730G>A	0.466981	1	98	0	113	1
AOAH	c.1469G>C	0.466981	1	98	0	113	1
SNORD115-41		0.466981	1	98	0	113	1
CNOT6L	c.1576C>T	0.466981	1	98	0	113	1
EFCAB6	c.1742T>C	0.466981	1	98	0	113	1
METTL14	c.1273C>T	0.466981	1	98	0	113	1
KIR3DX1	c.949G>A	0.466981	1	98	0	113	1
PAK4	c.-1C>T	0.466981	1	98	0	113	1
FUT3	c.334G>A	0.466981	1	98	0	113	1
PILRB	c.328C>T	0.466981	1	98	0	113	1
TET3	c.3314C>T	0.466981	1	98	0	113	1
AVPR1B	c.-16C>T	0.466981	1	98	0	113	1
COL5A3	c.2884G>A	0.466981	1	98	0	113	1
CMTR1	c.2099C>T	0.466981	1	98	0	113	1
DSP	c.8582C>T	0.466981	1	98	0	113	1
ZBTB16	c.*1A>G	0.466981	1	98	0	113	1
PLBD1	c.676G>A	0.466981	1	98	0	113	1
MYT1L	c.173_174delCG	0.466981	1	98	0	113	1
SCUBE3	c.1810G>A	0.466981	1	98	0	113	1
OR4K2	c.511C>T	0.466981	1	98	0	113	1
ZFHX4	c.8740G>A	0.466981	1	98	0	113	1
B4GALNT3	c.590G>A	0.466981	1	98	0	113	1
PCDHB9	c.389C>T	0.466981	1	98	0	113	1
EPHB2	c.2096C>T	0.466981	1	98	0	113	1
DDC	c.1417G>A	0.466981	1	98	0	113	1
CYP2C8	c.973G>A	0.466981	1	98	0	113	1
MC3R	c.-84G>A	0.466981	1	98	0	113	1
ABCC4	c.987A>C	0.466981	1	98	0	113	1
PCDHA7	c.1348G>A	0.466981	1	98	0	113	1
ADGRV1	c.5734G>A	0.466981	1	98	0	113	1
RP1	c.4375G>A	0.466981	1	98	0	113	1
RB1CC1	c.968C>T	0.466981	1	98	0	113	1
SPATA5L1	c.1958C>T	0.466981	1	98	0	113	1
SMR3A	c.205C>T	0.466981	1	98	0	113	1
IGHV1-45	c.250C>T	0.466981	1	98	0	113	1
ANKRD20A8P	n.1359delA	0.466981	1	98	0	113	1
TIAM1	c.1232A>G	0.466981	1	98	0	113	1
GRHL3	c.1249C>T	0.466981	1	98	0	113	1
RSPH9	c.664C>T	0.466981	1	98	0	113	1
MURC	c.790C>T	0.466981	1	98	0	113	1
PGM1	c.*36C>T	0.466981	1	98	0	113	1
ARHGEF35	c.1243G>A	0.466981	1	98	0	113	1
PAIP1	c.790C>T	0.466981	1	98	0	113	1
PLEKHG4B	c.815C>G	0.466981	1	98	0	113	1
HNRNPL	c.268-1G>A	0.466981	1	98	0	113	1
HIGD2B	c.109G>A	0.466981	1	98	0	113	1
STK31	c.2983G>A	0.466981	1	98	0	113	1
DPP10	c.728G>A	0.466981	1	98	0	113	1
ABCA8	c.3251C>T	0.466981	1	98	0	113	1
SIGLEC7	c.949G>A	0.466981	1	98	0	113	1
MAGEC1	c.2048C>T	0.466981	1	98	0	113	1
DUXA	c.439-2A>G	0.466981	1	98	0	113	1
KCNB1	c.2429G>A	0.466981	1	98	0	113	1
TLL1	c.2983G>A	0.466981	1	98	0	113	1
HOOK2	c.595C>T	0.466981	1	98	0	113	1
LINGO3	c.415G>C	0.466981	1	98	0	113	1
SCN11A	c.1671G>A	0.466981	1	98	0	113	1
ITPKB	c.2495C>A	0.466981	1	98	0	113	1
RBM12	c.1048T>G	0.466981	1	98	0	113	1
ADRB2	c.932T>G	0.466981	1	98	0	113	1
TIGIT	c.62G>A	0.466981	1	98	0	113	1
LGR5	c.*41G>A	0.466981	1	98	0	113	1
CSMD2	c.7207C>T	0.466981	1	98	0	113	1
COG3	c.898T>A	0.466981	1	98	0	113	1
TMEM132B	c.2068G>A	0.466981	1	98	0	113	1
BMPR2	c.662C>T	0.466981	1	98	0	113	1
POM121	c.-485C>T	0.466981	1	98	0	113	1
GRIA3	c.1829G>T	0.466981	1	98	0	113	1
ERBB4	c.380G>A	0.466981	1	98	0	113	1
ZAN	c.787G>A	0.466981	1	98	0	113	1
ADAM33	c.*130T>A	0.466981	1	98	0	113	1
KLK3	c.26C>T	0.466981	1	98	0	113	1
SERPINA5	c.556G>A	0.466981	1	98	0	113	1
GRIN3A	c.2060T>A	0.466981	1	98	0	113	1
CYBB	c.1223G>A	0.466981	1	98	0	113	1
SAMD9L	c.4675G>A	0.466981	1	98	0	113	1
SYPL2	c.529G>A	0.466981	1	98	0	113	1
KRTAP10-6	c.499G>A	0.466981	1	98	0	113	1
KIAA1279	c.432C>A	0.466981	1	98	0	113	1
NMT1	c.1321C>T	0.466981	1	98	0	113	1
COL4A4	c.2563G>A	0.466981	1	98	0	113	1
ZKSCAN2	c.1772C>T	0.466981	1	98	0	113	1
KRT28	c.304G>A	0.466981	1	98	0	113	1
WHSC1L1	c.844C>T	0.466981	1	98	0	113	1
OR2D2	c.385C>T	0.466981	1	98	0	113	1
TREML2	c.305G>A	0.466981	1	98	0	113	1
TRPM6	c.5644G>A	0.466981	1	98	0	113	1
TBC1D2B	c.952G>T	0.466981	1	98	0	113	1
CD63	c.472C>T	0.466981	1	98	0	113	1
GJD2	c.721G>A	0.466981	1	98	0	113	1
F13B	c.800G>C	0.466981	1	98	0	113	1
XDH	c.3496G>A	0.466981	1	98	0	113	1
HEPH	c.1138C>T	0.466981	1	98	0	113	1
LRRIQ3	c.1264G>A	0.466981	1	98	0	113	1
DAAM1	c.2102C>T	0.466981	1	98	0	113	1
KIAA1109	c.2510C>T	0.466981	1	98	0	113	1
OBSCN	c.11397C>T	0.466981	1	98	0	113	1
SPINK1	c.*19C>T	0.466981	1	98	0	113	1
C2CD2	c.463G>A	0.466981	1	98	0	113	1
SYNE2	c.8539C>T	0.466981	1	98	0	113	1
ZNF233	c.100C>T	0.466981	1	98	0	113	1
LRP2	c.12851T>C	0.466981	1	98	0	113	1
SIRPD	c.514G>A	0.466981	1	98	0	113	1
OR5H15	c.859C>T	0.466981	1	98	0	113	1
DRC7	c.1112G>A	0.466981	1	98	0	113	1
TSKU	c.322C>T	0.466981	1	98	0	113	1
CD5L	c.368C>T	0.466981	1	98	0	113	1
IPP	c.1501C>T	0.466981	1	98	0	113	1
EPHA6	c.857G>A	0.466981	1	98	0	113	1
FBP2	c.841G>A	0.466981	1	98	0	113	1
XIST	n.6058G>A	0.466981	1	98	0	113	1
KIFC2	c.1799C>T	0.466981	1	98	0	113	1
XIRP1	c.3989C>T	0.466981	1	98	0	113	1
HPGDS	c.337G>A	0.466981	1	98	0	113	1
MIB2	c.932G>A	0.466981	1	98	0	113	1
DPY19L2P1	n.553C>T	0.466981	1	98	0	113	1
LILRB1	c.1307C>A	0.466981	1	98	0	113	1
ST18	c.1264C>T	0.466981	1	98	0	113	1
KIAA1210	c.223G>A	0.466981	1	98	0	113	1
CYP4A11	c.286C>T	0.466981	1	98	0	113	1
PCDHB6	c.1802C>T	0.466981	1	98	0	113	1
JADE3	c.295G>A	0.466981	1	98	0	113	1
TRIM67	c.2222C>T	0.466981	1	98	0	113	1
LRRC18	c.560T>A	0.466981	1	98	0	113	1
ADAM32	c.1169C>T	0.466981	1	98	0	113	1
IGKV3-7	c.266G>A	0.466981	1	98	0	113	1
PRPF39	c.575T>C	0.466981	1	98	0	113	1
HECW1	c.2482G>A	0.466981	1	98	0	113	1
KCTD6	c.196C>T	0.466981	1	98	0	113	1
ABCC12	c.1108C>T	0.466981	1	98	0	113	1
LRRC56	c.1397C>T	0.466981	1	98	0	113	1
KBTBD4	c.878C>T	0.466981	1	98	0	113	1
ABI1	c.109T>C	0.466981	1	98	0	113	1
NIPBL	c.1334C>T	0.466981	1	98	0	113	1
RHCE	c.1154-1G>A	0.466981	1	98	0	113	1
PIGK	c.413G>A	0.466981	1	98	0	113	1
MOCS3	c.-15C>T	0.466981	1	98	0	113	1
ASPM	c.158G>A	0.466981	1	98	0	113	1
FASLG	c.209C>T	0.466981	1	98	0	113	1
C8A	c.967G>A	0.466981	1	98	0	113	1
ZNF98	c.4C>T	0.466981	1	98	0	113	1
WNT3A	c.*688G>A	0.466981	1	98	0	113	1
AKAP11	c.2516C>T	0.466981	1	98	0	113	1
EEF1DP3	n.2777C>T	0.466981	1	98	0	113	1
ZNF160	c.2041C>T	0.466981	1	98	0	113	1
FREM2	c.2456C>T	0.466981	1	98	0	113	1
TFEC	c.655C>T	0.466981	1	98	0	113	1
FGGY	c.758C>A	0.466981	1	98	0	113	1
NLRP11	c.1657C>T	0.466981	1	98	0	113	1
DCAF4L1	c.10G>A	0.466981	1	98	0	113	1
NR5A1	c.401C>T	0.466981	1	98	0	113	1
DSCAM	c.4415G>A	0.466981	1	98	0	113	1
NRAP	c.3565A>G	0.466981	1	98	0	113	1
SESTD1	c.1085T>G	0.466981	1	98	0	113	1
CSF3	c.85G>A	0.466981	1	98	0	113	1
PARD3B	c.2819C>T	0.466981	1	98	0	113	1
EFHB	c.482C>T	0.466981	1	98	0	113	1
FAIM2	c.451A>G	0.466981	1	98	0	113	1
PARN	c.1453C>T	0.466981	1	98	0	113	1
LRP1B	c.10141G>A	0.466981	1	98	0	113	1
MRGPRX1	c.271C>T	0.466981	1	98	0	113	1
SLC3A2	c.913A>C	0.466981	1	98	0	113	1
CSMD1	c.3769C>A	0.466981	1	98	0	113	1
SIGLEC10	c.265C>G	0.466981	1	98	0	113	1
KIAA1683	c.244C>T	0.466981	1	98	0	113	1
INPP5E	c.*97C>T	0.466981	1	98	0	113	1
PREX2	c.4072G>A	0.466981	1	98	0	113	1
LY6H		0.466981	1	98	0	113	1
ADAMTS16	c.567G>A	0.466981	1	98	0	113	1
TCN1	c.1261C>T	0.466981	1	98	0	113	1
MTM1	c.376G>A	0.466981	1	98	0	113	1
HERC2	c.10454C>T	0.466981	1	98	0	113	1
ACAN	c.1066G>A	0.466981	1	98	0	113	1
CSRNP3	c.712C>T	0.466981	1	98	0	113	1
MEGF8	c.4919C>T	0.466981	1	98	0	113	1
GTF2IRD2P1	n.1816G>A	0.466981	1	98	0	113	1
P2RY2	c.-59C>T	0.466981	1	98	0	113	1
FCAR	c.183G>A	0.466981	1	98	0	113	1
SSPO	c.287C>T	0.466981	1	98	0	113	1
C8A	c.565C>T	0.466981	1	98	0	113	1
OAS3	c.2522C>T	0.466981	1	98	0	113	1
DTD1	c.533C>T	0.466981	1	98	0	113	1
MKS1	c.950G>A	0.466981	1	98	0	113	1
HARBI1	c.501C>G	0.466981	1	98	0	113	1
GRIA2	c.751C>T	0.466981	1	98	0	113	1
ICE1	c.5626C>T	0.466981	1	98	0	113	1
PHTF1	c.1999G>A	0.466981	1	98	0	113	1
FAM184A	c.314G>A	0.466981	1	98	0	113	1
SPANXN3	c.400T>A	0.466981	1	98	0	113	1
TMEM63A	c.505G>A	0.466981	1	98	0	113	1
WT1	c.*10C>T	0.466981	1	98	0	113	1
TOX4	c.*1783G>A	0.466981	1	98	0	113	1
FAM208A	c.3430G>C	0.466981	1	98	0	113	1
APOH	c.63G>A	0.466981	1	98	0	113	1
DPEP3	c.1306-1G>A	0.466981	1	98	0	113	1
EVC2	c.2380G>A	0.466981	1	98	0	113	1
PNPLA1	c.1265C>T	0.466981	1	98	0	113	1
ARMC3	c.2518G>A	0.466981	1	98	0	113	1
COLEC12	c.1499G>A	0.466981	1	98	0	113	1
SPEF2	c.3382G>A	0.466981	1	98	0	113	1
TRIM55	c.1355A>G	0.466981	1	98	0	113	1
SYT10	c.10C>T	0.466981	1	98	0	113	1
ZNF445	c.782A>G	0.466981	1	98	0	113	1
PLG	c.475C>T	0.466981	1	98	0	113	1
GFOD1	c.308G>A	0.466981	1	98	0	113	1
ASAP3	c.2039G>A	0.466981	1	98	0	113	1
HAUS3	c.262_289dupGATTTGAAGACACCTAGACTGGATGATA	0.466981	1	98	0	113	1
SLC45A4	c.1895C>T	0.466981	1	98	0	113	1
RP11-178C3.1		0.466981	1	98	0	113	1
HNRNPCP2	n.783dupT	0.466981	1	98	0	113	1
SYBU	c.265C>T	0.466981	1	98	0	113	1
A1CF	c.1306C>T	0.466981	1	98	0	113	1
DCLK1	c.1625G>A	0.466981	1	98	0	113	1
SCN1A	c.2572C>T	0.466981	1	98	0	113	1
PRR5L	c.20C>T	0.466981	1	98	0	113	1
SCNN1G	c.*22C>T	0.466981	1	98	0	113	1
JPH3	c.19T>A	0.466981	1	98	0	113	1
SLC35F3	c.181G>A	0.466981	1	98	0	113	1
SPECC1	c.94A>C	0.466981	1	98	0	113	1
CCNB3	c.4159G>C	0.466981	1	98	0	113	1
WDR72	c.3003G>A	0.466981	1	98	0	113	1
PSMD5	c.112delC	0.466981	1	98	0	113	1
C17orf74	c.373C>T	0.466981	1	98	0	113	1
ARAF	c.460T>C	0.466981	1	98	0	113	1
F13A1	c.2053C>T	0.466981	1	98	0	113	1
AKAP6	c.6184G>A	0.466981	1	98	0	113	1
PCDHB6	c.290C>T	0.466981	1	98	0	113	1
C1orf186	c.*25C>T	0.466981	1	98	0	113	1
PARVA	c.1103C>T	0.466981	1	98	0	113	1
MYO9A	c.2302+7C>T	0.466981	1	98	0	113	1
ITGA1	c.2644C>T	0.466981	1	98	0	113	1
UMPS	c.-73C>T	0.466981	1	98	0	113	1
HEPACAM	c.242A>T	0.466981	1	98	0	113	1
PRSS27	c.500G>A	0.466981	1	98	0	113	1
DCC	c.4072G>A	0.466981	1	98	0	113	1
LILRA2	c.*11G>A	0.466981	1	98	0	113	1
TM2D3		0.466981	1	98	0	113	1
HYDIN	c.6601G>A	0.466981	1	98	0	113	1
LIFR	c.1738G>A	0.466981	1	98	0	113	1
ERN2	c.2912C>T	0.466981	1	98	0	113	1
ITM2B	c.412G>A	0.466981	1	98	0	113	1
GUCY1A3	c.*112_*113insCTAGGGAAGTTT	0.466981	1	98	0	113	1
OR14C36	c.588G>A	0.466981	1	98	0	113	1
ZMYND15	c.1326C>G	0.466981	1	98	0	113	1
TSPAN33	c.105G>A	0.466981	1	98	0	113	1
NIPBL	c.-52C>T	0.466981	1	98	0	113	1
OR51V1	c.211T>G	0.466981	1	98	0	113	1
L1CAM	c.3671C>T	0.466981	1	98	0	113	1
S100B	c.*93C>T	0.466981	1	98	0	113	1
ITLN1	c.832C>T	0.466981	1	98	0	113	1
FAM120AOS	c.25G>A	0.466981	1	98	0	113	1
TBX10	c.500C>T	0.466981	1	98	0	113	1
KDM7A	c.2156C>T	0.466981	1	98	0	113	1
ITIH3	c.1637G>A	0.466981	1	98	0	113	1
ABLIM1	c.-10C>T	0.466981	1	98	0	113	1
CR1	c.5372G>A	0.466981	1	98	0	113	1
DDX60	c.1531G>A	0.466981	1	98	0	113	1
PCSK1	c.893G>A	0.466981	1	98	0	113	1
DYNAP	c.355C>T	0.466981	1	98	0	113	1
TRIM37	c.451C>T	0.466981	1	98	0	113	1
UGT3A2	c.827T>A	0.466981	1	98	0	113	1
FCRL4	c.664G>A	0.466981	1	98	0	113	1
PDLIM1	c.755G>A	0.466981	1	98	0	113	1
FAM114A1	c.1163C>T	0.466981	1	98	0	113	1
CSMD1	c.9307C>T	0.466981	1	98	0	113	1
NRK	c.620G>A	0.466981	1	98	0	113	1
NLRP4	c.1554T>A	0.466981	1	98	0	113	1
DAB2IP	c.2438C>T	0.466981	1	98	0	113	1
PARP2	c.285C>G	0.466981	1	98	0	113	1
NPSR1	c.128C>T	0.466981	1	98	0	113	1
ASS1	c.718G>A	0.466981	1	98	0	113	1
USP48	c.1909G>A	0.466981	1	98	0	113	1
MAGEC1	c.1316C>T	0.466981	1	98	0	113	1
SLC9A2	c.583G>A	0.466981	1	98	0	113	1
PTPRS	c.4883G>A	0.466981	1	98	0	113	1
RELN	c.1690C>T	0.466981	1	98	0	113	1
CAMKK1	c.71A>T	0.466981	1	98	0	113	1
EVPL	c.3026C>T	0.466981	1	98	0	113	1
MROH7	c.470C>T	0.466981	1	98	0	113	1
CLDN20	c.-34G>A	0.466981	1	98	0	113	1
TRIM15	c.138G>A	0.466981	1	98	0	113	1
CEP112	c.1298A>T	0.466981	1	98	0	113	1
SPTA1	c.3002G>A	0.466981	1	98	0	113	1
ZNF738		0.466981	1	98	0	113	1
GMIP	c.2876C>T	0.466981	1	98	0	113	1
EHMT1	c.661C>T	0.466981	1	98	0	113	1
GLI2	c.245G>A	0.466981	1	98	0	113	1
SPTLC3	c.109G>A	0.466981	1	98	0	113	1
SLC7A13	c.803A>G	0.466981	1	98	0	113	1
KCTD16	c.1027G>A	0.466981	1	98	0	113	1
MDFIC	c.*49C>T	0.466981	1	98	0	113	1
PRPF3	c.*171C>T	0.466981	1	98	0	113	1
LILRP2	n.1862G>A	0.466981	1	98	0	113	1
SLC9C1	c.2971C>T	0.466981	1	98	0	113	1
KCNT1	c.3490G>A	0.466981	1	98	0	113	1
FUNDC2P2	n.466C>T	0.466981	1	98	0	113	1
ASB2	c.1750G>A	0.466981	1	98	0	113	1
PAX7	c.190delC	0.466981	1	98	0	113	1
PIGK	c.1100C>T	0.466981	1	98	0	113	1
USH2A	c.10667G>A	0.466981	1	98	0	113	1
ANXA10	c.195G>A	0.466981	1	98	0	113	1
ARMCX2	c.368T>C	0.466981	1	98	0	113	1
ABCA12	c.6625G>A	0.466981	1	98	0	113	1
FAM183B	c.271G>A	0.466981	1	98	0	113	1
SELE	c.1796C>T	0.466981	1	98	0	113	1
FER1L6	c.2008G>A	0.466981	1	98	0	113	1
NGF	c.433G>A	0.466981	1	98	0	113	1
BEST3	c.1169C>T	0.466981	1	98	0	113	1
BPTF	c.6608T>G	0.466981	1	98	0	113	1
ABCA10	c.3973G>A	0.466981	1	98	0	113	1
CACNA1S	c.4856C>T	0.466981	1	98	0	113	1
TTN	c.97627G>A	0.466981	1	98	0	113	1
PCDH15	c.4619C>T	0.466981	1	98	0	113	1
MLIP	c.164T>A	0.466981	1	98	0	113	1
RIMS2	c.1408C>T	0.466981	1	98	0	113	1
TRAV12-3	c.19G>A	0.466981	1	98	0	113	1
WDR31	c.181C>T	0.466981	1	98	0	113	1
C1orf168	c.1780G>A	0.466981	1	98	0	113	1
MYL1	c.371A>G	0.466981	1	98	0	113	1
COL11A2	c.2989G>A	0.466981	1	98	0	113	1
NDST4	c.2029C>T	0.466981	1	98	0	113	1
FAM171B	c.1310C>T	0.466981	1	98	0	113	1
SCN10A	c.5459C>T	0.466981	1	98	0	113	1
SYNE1	c.20977G>T	0.466981	1	98	0	113	1
ZBBX	c.1480G>A	0.466981	1	98	0	113	1
RBM19	c.665C>T	0.466981	1	98	0	113	1
LPIN3	c.29C>T	0.466981	1	98	0	113	1
TOPBP1	c.1889C>T	0.466981	1	98	0	113	1
MCF2	c.2437G>A	0.466981	1	98	0	113	1
ELL	c.-45G>A	0.466981	1	98	0	113	1
AC027612.6	n.80C>T	0.466981	1	98	0	113	1
CLGN	c.1408C>T	0.466981	1	98	0	113	1
MCF2L2	c.376C>T	0.466981	1	98	0	113	1
METTL4	c.1210C>T	0.466981	1	98	0	113	1
CXCR2	c.412G>A	0.466981	1	98	0	113	1
UBXN8	c.-8C>T	0.466981	1	98	0	113	1
SPAST	c.1688-1G>A	0.466981	1	98	0	113	1
MUC16	c.20927C>T	0.466981	1	98	0	113	1
FOXRED1	c.277C>T	0.466981	1	98	0	113	1
TMEM200A	c.1057G>A	0.466981	1	98	0	113	1
PSMA5	c.49C>T	0.466981	1	98	0	113	1
PRKAA2	c.1175C>T	0.466981	1	98	0	113	1
ABCC3	c.2476G>A	0.466981	1	98	0	113	1
RTP5	c.772G>A	0.466981	1	98	0	113	1
CDX2	c.*59C>T	0.466981	1	98	0	113	1
MUC17	c.427G>A	0.466981	1	98	0	113	1
COL27A1	c.1745C>T	0.466981	1	98	0	113	1
SNX11	c.487C>T	0.466981	1	98	0	113	1
TNFSF4	c.163C>T	0.466981	1	98	0	113	1
CPS1	c.4027C>T	0.466981	1	98	0	113	1
CYP2C18	c.*89G>A	0.466981	1	98	0	113	1
APOB	c.9140C>T	0.466981	1	98	0	113	1
CAP2	c.394C>T	0.466981	1	98	0	113	1
ZNF207	c.-10G>A	0.466981	1	98	0	113	1
TSSK1B	c.813G>A	0.466981	1	98	0	113	1
GPATCH8	c.4490C>T	0.466981	1	98	0	113	1
RALGPS2	c.696G>A	0.466981	1	98	0	113	1
MIR519C	n.25G>A	0.466981	1	98	0	113	1
ASXL3	c.1157C>T	0.466981	1	98	0	113	1
DNAH5	c.11317G>A	0.466981	1	98	0	113	1
NR1H4	c.350C>T	0.466981	1	98	0	113	1
PTCHD1	c.1634A>T	0.466981	1	98	0	113	1
CHGB	c.382G>A	0.466981	1	98	0	113	1
DCC	c.473T>A	0.466981	1	98	0	113	1
CDCP1	c.302C>T	0.466981	1	98	0	113	1
SLAMF8	c.-87G>A	0.466981	1	98	0	113	1
PCSK5	c.2300G>T	0.466981	1	98	0	113	1
SH3BP5	c.400G>A	0.466981	1	98	0	113	1
ADGRG4	c.9083G>A	0.466981	1	98	0	113	1
RIT1	c.475C>T	0.466981	1	98	0	113	1
ULBP3	c.662C>T	0.466981	1	98	0	113	1
OR8J1	c.122G>A	0.466981	1	98	0	113	1
NF2	c.516G>A	0.466981	1	98	0	113	1
ATP2A3	c.1313G>A	0.466981	1	98	0	113	1
SLC7A4	c.373G>A	0.466981	1	98	0	113	1
OR2W5	n.871G>A	0.466981	1	98	0	113	1
ANXA2P3	n.471G>A	0.466981	1	98	0	113	1
DCDC1	c.-52C>T	0.466981	1	98	0	113	1
UGT2A3	c.1369C>T	0.466981	1	98	0	113	1
CDH4	c.512G>A	0.466981	1	98	0	113	1
USP44	c.676G>A	0.466981	1	98	0	113	1
MAGEA6	c.572G>A	0.466981	1	98	0	113	1
C7orf34	c.-8G>A	0.466981	1	98	0	113	1
USH1C	c.598G>A	0.466981	1	98	0	113	1
ADCY10	c.2743G>A	0.466981	1	98	0	113	1
PLXNA4	c.1999_2012delGAGAGTCCATACCG	0.466981	1	98	0	113	1
PSMD12	c.860T>C	0.466981	1	98	0	113	1
PRDM1	c.2069C>T	0.466981	1	98	0	113	1
ADAMTS9	c.2426G>A	0.466981	1	98	0	113	1
PKDREJ	c.6343G>A	0.466981	1	98	0	113	1
WHSC1	c.215C>T	0.466981	1	98	0	113	1
SCN11A	c.-83G>A	0.466981	1	98	0	113	1
KCNK16	c.832G>A	0.466981	1	98	0	113	1
CHRNA9	c.202A>G	0.466981	1	98	0	113	1
TPH1	c.827G>A	0.466981	1	98	0	113	1
TTN	c.29476G>A	0.466981	1	98	0	113	1
XRCC4	c.40C>G	0.466981	1	98	0	113	1
BRD2	c.905C>T	0.466981	1	98	0	113	1
AC091565.1		0.466981	1	98	0	113	1
ZIM3	c.782C>T	0.466981	1	98	0	113	1
ADCY10	c.3837G>A	0.466981	1	98	0	113	1
RASA2	c.601G>A	0.466981	1	98	0	113	1
ANKS1B	c.1487G>A	0.466981	1	98	0	113	1
EXD1	c.1001T>A	0.466981	1	98	0	113	1
KDM6A	c.1544T>C	0.466981	1	98	0	113	1
EIF4A1	c.514+2T>A	0.466981	1	98	0	113	1
SLC13A4	c.1108G>A	0.466981	1	98	0	113	1
COX7C	c.92T>G	0.466981	1	98	0	113	1
AKR1C4	c.349C>T	0.466981	1	98	0	113	1
BAZ2B	c.1595C>T	0.466981	1	98	0	113	1
OTOA	c.2192C>T	0.466981	1	98	0	113	1
CHRNA3	c.1087G>A	0.466981	1	98	0	113	1
ZNF556	c.734C>T	0.466981	1	98	0	113	1
CEP250	c.526C>T	0.466981	1	98	0	113	1
GOLGA3	c.1706C>T	0.466981	1	98	0	113	1
MUC2	n.10748G>A	0.466981	1	98	0	113	1
PKD1L1	c.8057T>A	0.466981	1	98	0	113	1
PLAA	c.802C>T	0.466981	1	98	0	113	1
MAD1L1	c.104C>T	0.466981	1	98	0	113	1
OR7D2	c.122G>A	0.466981	1	98	0	113	1
ZNF229	c.286delA	0.466981	1	98	0	113	1
CACNA2D3	c.1934C>T	0.466981	1	98	0	113	1
OBSCN	c.22898G>A	0.466981	1	98	0	113	1
ELAVL4	c.685C>T	0.466981	1	98	0	113	1
NSUN7	c.997C>T	0.466981	1	98	0	113	1
CACNA1C	c.2834C>T	0.466981	1	98	0	113	1
OR13C3	c.774G>A	0.466981	1	98	0	113	1
DEFB119	c.-58G>A	0.466981	1	98	0	113	1
CEP128	c.2194C>T	0.466981	1	98	0	113	1
ZNF121	c.209C>T	0.466981	1	98	0	113	1
CAP2	c.1210-3C>T	0.466981	1	98	0	113	1
RP11-35N6.1	c.157G>A	0.466981	1	98	0	113	1
GTF2E2	c.748C>T	0.466981	1	98	0	113	1
IVNS1ABP	c.*1C>T	0.466981	1	98	0	113	1
RYR3	c.19G>A	0.466981	1	98	0	113	1
COL5A1	c.2894C>G	0.466981	1	98	0	113	1
ADAMTS16	c.1243C>T	0.466981	1	98	0	113	1
KCNA5	c.617G>A	0.466981	1	98	0	113	1
ZNF645	c.869C>T	0.466981	1	98	0	113	1
PCLO	c.8236G>A	0.466981	1	98	0	113	1
ZNF285	c.1238C>T	0.466981	1	98	0	113	1
ARMS2	c.-32C>T	0.466981	1	98	0	113	1
SRCAP	c.6659C>T	0.466981	1	98	0	113	1
PTEN	c.113C>T	0.466981	1	98	0	113	1
ERBB4	c.1913G>A	0.466981	1	98	0	113	1
FLG2	c.6407C>T	0.466981	1	98	0	113	1
SASS6	c.1891G>A	0.466981	1	98	0	113	1
C12orf43	c.751C>T	0.466981	1	98	0	113	1
MUC21	c.341C>T	0.466981	1	98	0	113	1
MARCO	c.1199G>A	0.466981	1	98	0	113	1
TINAG	c.299C>G	0.466981	1	98	0	113	1
USP6	c.2362G>A	0.466981	1	98	0	113	1
FBXO39	c.569G>A	0.466981	1	98	0	113	1
MLXIPL	c.1945A>G	0.466981	1	98	0	113	1
KIAA1468	c.2723C>T	0.466981	1	98	0	113	1
PTPRT	c.2731G>A	0.466981	1	98	0	113	1
INTS2	c.616A>T	0.466981	1	98	0	113	1
ACE2	c.*26G>A	0.466981	1	98	0	113	1
SPAG7	c.*80C>T	0.466981	1	98	0	113	1
PKM	c.1141-4C>T	0.466981	1	98	0	113	1
FLNB	c.1321C>T	0.466981	1	98	0	113	1
IQUB	c.47C>T	0.466981	1	98	0	113	1
OR8J3	c.391C>T	0.466981	1	98	0	113	1
RASGRF1	c.1519G>A	0.466981	1	98	0	113	1
PALM2	c.*68C>T	0.466981	1	98	0	113	1
PAK2	c.926T>A	0.466981	1	98	0	113	1
FOXK2	c.*4C>T	0.466981	1	98	0	113	1
C3orf70	c.253C>T	0.466981	1	98	0	113	1
ZNF417	c.965G>A	0.466981	1	98	0	113	1
PID1	c.392C>T	0.466981	1	98	0	113	1
ROBO4	c.2917G>A	0.466981	1	98	0	113	1
SSPO	c.6686C>T	0.466981	1	98	0	113	1
AHR	c.2282C>T	0.466981	1	98	0	113	1
EIF1B	c.70C>T	0.466981	1	98	0	113	1
DLG2	c.577G>A	0.466981	1	98	0	113	1
KEL	c.1144C>T	0.466981	1	98	0	113	1
FAM135B	c.17G>A	0.466981	1	98	0	113	1
SCN8A	c.2395G>A	0.466981	1	98	0	113	1
TCHHL1	c.2176G>A	0.466981	1	98	0	113	1
OR6K3	c.283C>T	0.466981	1	98	0	113	1
SORL1	c.529-1G>A	0.466981	1	98	0	113	1
LNX2	c.1156C>T	0.466981	1	98	0	113	1
OR6C6	c.680C>A	0.466981	1	98	0	113	1
ADAM21P1	n.670G>T	0.466981	1	98	0	113	1
RAB4A	c.291C>T	0.466981	1	98	0	113	1
PSKH2	c.412G>A	0.466981	1	98	0	113	1
ZNF326	c.410C>T	0.466981	1	98	0	113	1
KCNH7	c.2654G>A	0.466981	1	98	0	113	1
CNGA1	c.3G>A	0.466981	1	98	0	113	1
CRYBB2	c.169G>A	0.466981	1	98	0	113	1
CUL2	c.544C>T	0.466981	1	98	0	113	1
CRYBG3	c.7997C>T	0.466981	1	98	0	113	1
NPY	c.*122C>T	0.466981	1	98	0	113	1
CASP14	c.541G>A	0.466981	1	98	0	113	1
RP1	c.4910G>A	0.466981	1	98	0	113	1
ADGRB2	c.3676G>A	0.466981	1	98	0	113	1
TBC1D19	c.473T>C	0.466981	1	98	0	113	1
CACNA1I	c.2617C>T	0.466981	1	98	0	113	1
OR8K1	c.3G>A	0.466981	1	98	0	113	1
MTUS2	c.899C>T	0.466981	1	98	0	113	1
PARD6B	c.235C>T	0.466981	1	98	0	113	1
C5orf38	c.*49G>A	0.466981	1	98	0	113	1
TRIM58	c.1058G>A	0.466981	1	98	0	113	1
ZDBF2	c.5050C>T	0.466981	1	98	0	113	1
STRN4	c.1183G>A	0.466981	1	98	0	113	1
GOLGB1	c.5854G>A	0.466981	1	98	0	113	1
GNAO1	c.188G>A	0.466981	1	98	0	113	1
TMPRSS12	c.841A>T	0.466981	1	98	0	113	1
FOXK2	c.1788C>T	0.466981	1	98	0	113	1
NELL1	c.1824G>A	0.466981	1	98	0	113	1
NLRP1	c.3935G>A	0.466981	1	98	0	113	1
PIK3R5	c.352C>T	0.466981	1	98	0	113	1
LPXN	c.*65G>T	0.466981	1	98	0	113	1
MYO9A	c.6028C>T	0.466981	1	98	0	113	1
RHOBTB3	c.713C>T	0.466981	1	98	0	113	1
KSR2	c.2230G>A	0.466981	1	98	0	113	1
DCTN1	c.3382C>T	0.466981	1	98	0	113	1
C1orf158	c.298G>A	0.466981	1	98	0	113	1
C10orf120	c.698G>A	0.466981	1	98	0	113	1
WDR3	c.941T>A	0.466981	1	98	0	113	1
DNMT1	c.3973C>T	0.466981	1	98	0	113	1
FAM81A	c.163A>G	0.466981	1	98	0	113	1
UGT2B10	c.719-3C>T	0.466981	1	98	0	113	1
MURC	c.839G>A	0.466981	1	98	0	113	1
SALL1	c.2372G>A	0.466981	1	98	0	113	1
FAM71B	c.748C>T	0.466981	1	98	0	113	1
COL6A5	c.7331C>T	0.466981	1	98	0	113	1
DNM2	c.1108T>C	0.466981	1	98	0	113	1
SLC6A11	c.1070G>A	0.466981	1	98	0	113	1
COL10A1	c.1246G>A	0.466981	1	98	0	113	1
COL3A1	c.3749_3750insCAAGGCCGTGCACCCCTGG	0.466981	1	98	0	113	1
GLT1D1	c.136G>A	0.466981	1	98	0	113	1
COL2A1	c.2788G>A	0.466981	1	98	0	113	1
SMARCC1	c.3065C>T	0.466981	1	98	0	113	1
ITGA9	c.655G>A	0.466981	1	98	0	113	1
COL1A2	c.542G>A	0.466981	1	98	0	113	1
MCF2	c.2020G>A	0.466981	1	98	0	113	1
ATG7	c.1831C>T	0.466981	1	98	0	113	1
OSBP2	c.1723G>A	0.466981	1	98	0	113	1
RBBP6	c.4705C>T	0.466981	1	98	0	113	1
CNPPD1	c.1204C>T	0.466981	1	98	0	113	1
HERC1	c.9215_9220delTGTATG	0.466981	1	98	0	113	1
PPP1R26	c.797C>T	0.466981	1	98	0	113	1
FSIP1	c.1631G>A	0.466981	1	98	0	113	1
CRISPLD2	c.1255G>A	0.466981	1	98	0	113	1
MAML1	c.373G>A	0.466981	1	98	0	113	1
KCNH6	c.2800G>A	0.466981	1	98	0	113	1
ADGRG4	c.1576G>A	0.466981	1	98	0	113	1
SYTL5	c.1495G>A	0.466981	1	98	0	113	1
SLX4	c.3119C>T	0.466981	1	98	0	113	1
ZNF521	c.2911C>T	0.466981	1	98	0	113	1
SHANK2	c.2188G>A	0.466981	1	98	0	113	1
PPP1R3A	c.2036A>C	0.466981	1	98	0	113	1
PCDHB4	c.682C>T	0.466981	1	98	0	113	1
NOC3L	c.2104C>T	0.466981	1	98	0	113	1
TSGA10	c.26C>T	0.466981	1	98	0	113	1
DNAH3	c.10381C>T	0.466981	1	98	0	113	1
GATA1	c.758G>A	0.466981	1	98	0	113	1
OR4N2	c.354G>A	0.466981	1	98	0	113	1
KNTC1	c.4780C>T	0.466981	1	98	0	113	1
PCDHGA1	c.1387G>A	0.466981	1	98	0	113	1
IGLL1	c.*52G>A	0.466981	1	98	0	113	1
OR9A4	c.728C>T	0.466981	1	98	0	113	1
CMTM4	c.*17G>A	0.466981	1	98	0	113	1
ATP11C	c.*156C>T	0.466981	1	98	0	113	1
RIC3	c.323T>A	0.466981	1	98	0	113	1
TRIM42	c.1709G>A	0.466981	1	98	0	113	1
MUC16	c.10328C>T	0.466981	1	98	0	113	1
CCS	c.545G>A	0.466981	1	98	0	113	1
ZFAT	c.2906C>T	0.466981	1	98	0	113	1
CCAR2	c.1451C>T	0.466981	1	98	0	113	1
UGT2A1	c.1369C>T	0.466981	1	98	0	113	1
UBR4	c.9544C>T	0.466981	1	98	0	113	1
PMEL	c.640C>T	0.466981	1	98	0	113	1
ESYT3	c.1738C>T	0.466981	1	98	0	113	1
DAB1	c.1583C>T	0.466981	1	98	0	113	1
DUSP13	c.*803C>T	0.466981	1	98	0	113	1
CD163	c.1497G>C	0.466981	1	98	0	113	1
RELN	c.3061G>A	0.466981	1	98	0	113	1
EGLN1	c.949C>T	0.466981	1	98	0	113	1
HECW1	c.2826C>A	0.466981	1	98	0	113	1
AIRE	c.919G>A	0.466981	1	98	0	113	1
ERCC6L2	c.427C>T	0.466981	1	98	0	113	1
ZNF711	c.1837C>T	0.466981	1	98	0	113	1
LCT	c.720G>A	0.466981	1	98	0	113	1
SLC2A10	c.410C>T	0.466981	1	98	0	113	1
ADAMTS18	c.1418C>T	0.466981	1	98	0	113	1
DYNAP	c.419G>A	0.466981	1	98	0	113	1
DNAH11	c.13025C>T	0.466981	1	98	0	113	1
OR6C6	c.794G>A	0.466981	1	98	0	113	1
TRPS1	c.3365C>T	0.466981	1	98	0	113	1
MYLK	c.2391G>A	0.466981	1	98	0	113	1
WDR88	c.179C>T	0.466981	1	98	0	113	1
DCSTAMP	c.74G>A	0.466981	1	98	0	113	1
TANGO6	c.2258C>T	0.466981	1	98	0	113	1
SLC29A2	c.44G>A	0.466981	1	98	0	113	1
UGT1A5	c.251G>A	0.466981	1	98	0	113	1
XRCC4	c.28C>T	0.466981	1	98	0	113	1
C2orf71	c.1157C>T	0.466981	1	98	0	113	1
SYNE1	c.10145G>A	0.466981	1	98	0	113	1
CD84	c.548C>T	0.466981	1	98	0	113	1
TRPC3	c.932C>T	0.466981	1	98	0	113	1
SHCBP1L	c.1639G>A	0.466981	1	98	0	113	1
SPTBN1	c.4529C>T	0.466981	1	98	0	113	1
URM1	c.*25C>T	0.466981	1	98	0	113	1
CASR	c.115C>T	0.466981	1	98	0	113	1
DNMT3A	c.2478+3C>T	0.466981	1	98	0	113	1
UIMC1	c.986C>T	0.466981	1	98	0	113	1
PDE3A	c.2101G>A	0.466981	1	98	0	113	1
EGR4	c.1193G>A	0.466981	1	98	0	113	1
RAB41	c.640G>A	0.466981	1	98	0	113	1
PTCHD3	c.2134C>T	0.466981	1	98	0	113	1
DUSP21	c.247G>A	0.466981	1	98	0	113	1
GTSE1	c.515C>T	0.466981	1	98	0	113	1
ZFP69	c.97G>A	0.466981	1	98	0	113	1
PLAGL2	c.863C>T	0.466981	1	98	0	113	1
OR5AC2	c.279G>A	0.466981	1	98	0	113	1
CPNE2	c.344C>T	0.466981	1	98	0	113	1
CDH8	c.712G>A	0.466981	1	98	0	113	1
FARSB	c.1598A>T	0.466981	1	98	0	113	1
SPHKAP	c.1309G>A	0.466981	1	98	0	113	1
DAB1	c.1577C>T	0.466981	1	98	0	113	1
ZKSCAN3	c.100T>G	0.466981	1	98	0	113	1
USH2A	c.11627A>C	0.466981	1	98	0	113	1
TTC14	c.-90C>T	0.466981	1	98	0	113	1
VWA2	c.937G>A	0.466981	1	98	0	113	1
NUP155	c.3421C>T	0.466981	1	98	0	113	1
SYT10	c.1052G>A	0.466981	1	98	0	113	1
EPHB3	c.2359C>T	0.466981	1	98	0	113	1
ABCA10	c.1438C>T	0.466981	1	98	0	113	1
LRRC4C	c.1343C>A	0.466981	1	98	0	113	1
TRBV5-1	c.274C>T	0.466981	1	98	0	113	1
SNRPN	c.*52A>G	0.466981	1	98	0	113	1
ADAM29	c.1507G>A	0.466981	1	98	0	113	1
TLR7	c.2536T>C	0.466981	1	98	0	113	1
OR52H1	c.620G>A	0.466981	1	98	0	113	1
IGHD	c.534G>A	0.466981	1	98	0	113	1
DSG4	c.2192G>A	0.466981	1	98	0	113	1
COL11A1	c.3797C>T	0.466981	1	98	0	113	1
DCC	c.203G>A	0.466981	1	98	0	113	1
CSRP3	c.493G>A	0.466981	1	98	0	113	1
FASN	c.1606C>T	0.466981	1	98	0	113	1
MUC3A	c.8691_8693delTAG	0.466981	1	98	0	113	1
STXBP2	c.1213C>T	0.466981	1	98	0	113	1
OR5AC2	c.17G>A	0.466981	1	98	0	113	1
SUGP2	c.1690C>T	0.466981	1	98	0	113	1
TLL2	c.2236G>A	0.466981	1	98	0	113	1
APBA2	c.268C>T	0.466981	1	98	0	113	1
NLRP3	c.305C>T	0.466981	1	98	0	113	1
DCTN1	c.959C>T	0.466981	1	98	0	113	1
KATNAL2	c.506G>A	0.466981	1	98	0	113	1
TRPC6	c.2749G>A	0.466981	1	98	0	113	1
SPRR2D	c.*37G>A	0.466981	1	98	0	113	1
ZNF501	c.611C>T	0.466981	1	98	0	113	1
RARB		0.466981	1	98	0	113	1
C2orf16	c.4706C>T	0.466981	1	98	0	113	1
LAIR2	c.125G>A	0.466981	1	98	0	113	1
TAS2R9	c.155C>T	0.466981	1	98	0	113	1
COL4A6	c.3160G>A	0.466981	1	98	0	113	1
CCDC39	c.1864G>A	0.466981	1	98	0	113	1
UVSSA	c.1948G>A	0.466981	1	98	0	113	1
IGSF1	c.326G>A	0.466981	1	98	0	113	1
DNAH10	c.658G>A	0.466981	1	98	0	113	1
LRRC31	c.880G>A	0.466981	1	98	0	113	1
ZBTB16	c.1877G>A	0.466981	1	98	0	113	1
APEX2	c.325G>A	0.466981	1	98	0	113	1
TBX18	c.1201C>T	0.466981	1	98	0	113	1
SLC41A1	c.1073-6C>T	0.466981	1	98	0	113	1
MUC16	c.7933C>T	0.466981	1	98	0	113	1
TDRD5	c.1509G>A	0.466981	1	98	0	113	1
NCEH1	c.598C>T	0.466981	1	98	0	113	1
ASTN1	c.253G>A	0.466981	1	98	0	113	1
TTC31	c.1249C>T	0.466981	1	98	0	113	1
AOAH	c.1013C>T	0.466981	1	98	0	113	1
TNFAIP8L3	c.82G>A	0.466981	1	98	0	113	1
ATP8B3	c.3454G>A	0.466981	1	98	0	113	1
TTBK2	c.3392C>T	0.466981	1	98	0	113	1
FBXW10	c.2293G>A	0.466981	1	98	0	113	1
TAF1L	c.16G>A	0.466981	1	98	0	113	1
TCF4	c.1543T>C	0.466981	1	98	0	113	1
ACTN2	c.721G>A	0.466981	1	98	0	113	1
WDR81	c.3340A>G	0.466981	1	98	0	113	1
P2RY12	c.980G>A	0.466981	1	98	0	113	1
OR2M7	c.803C>T	0.466981	1	98	0	113	1
FIBIN	c.199G>A	0.466981	1	98	0	113	1
REC114	c.367G>A	0.466981	1	98	0	113	1
SPACA1	c.391C>T	0.466981	1	98	0	113	1
ACAP1	c.1751C>T	0.466981	1	98	0	113	1
SORCS3	c.2419G>A	0.466981	1	98	0	113	1
NSUN5	c.797C>T	0.466981	1	98	0	113	1
FBLN2	c.1997C>T	0.466981	1	98	0	113	1
SYTL4	c.300G>A	0.466981	1	98	0	113	1
DHX37	c.2161A>T	0.466981	1	98	0	113	1
SHC2	c.974C>T	0.466981	1	98	0	113	1
ZNF8	c.727C>T	0.466981	1	98	0	113	1
CPXM2	c.1984T>A	0.466981	1	98	0	113	1
HERC2	c.12617C>T	0.466981	1	98	0	113	1
NBEAL1	c.6442C>T	0.466981	1	98	0	113	1
MKL2	c.1166C>T	0.466981	1	98	0	113	1
ZEB1	c.2038C>T	0.466981	1	98	0	113	1
HEG1	c.2969C>T	0.466981	1	98	0	113	1
CCDC108	c.3334G>A	0.466981	1	98	0	113	1
CLDN18	c.22G>A	0.466981	1	98	0	113	1
DSC1	c.1540G>A	0.466981	1	98	0	113	1
OR2A2	c.589G>A	0.466981	1	98	0	113	1
ARMC12	c.422G>A	0.466981	1	98	0	113	1
TTLL5	c.449T>G	0.466981	1	98	0	113	1
TIFAB	c.121G>A	0.466981	1	98	0	113	1
TNRC18	c.6821T>A	0.466981	1	98	0	113	1
RAG2	c.601C>T	0.466981	1	98	0	113	1
AMPD1	c.161C>T	0.466981	1	98	0	113	1
FLNC	c.2165G>A	0.466981	1	98	0	113	1
CILP2	c.950G>A	0.466981	1	98	0	113	1
MCOLN3	c.461C>T	0.466981	1	98	0	113	1
OR4D6	c.689G>A	0.466981	1	98	0	113	1
ZNF599	c.422C>T	0.466981	1	98	0	113	1
RNF25	c.1286G>A	0.466981	1	98	0	113	1
KCND3	c.923G>A	0.466981	1	98	0	113	1
ADAMTS10	c.629G>C	0.466981	1	98	0	113	1
GNG4	c.115G>A	0.466981	1	98	0	113	1
CST1	c.284C>T	0.466981	1	98	0	113	1
C6orf58	c.877C>T	0.466981	1	98	0	113	1
FPR1	c.3G>A	0.466981	1	98	0	113	1
ARAP2	c.4168C>T	0.466981	1	98	0	113	1
TAF1L	c.5189G>A	0.466981	1	98	0	113	1
MUC17	c.186T>C	0.466981	1	98	0	113	1
CRB1	c.4075C>T	0.466981	1	98	0	113	1
OR2M7	c.684G>A	0.466981	1	98	0	113	1
DYNC2H1	c.7963G>A	0.466981	1	98	0	113	1
OR10Z1	c.619C>T	0.466981	1	98	0	113	1
PCDHA3	c.2387C>T	0.466981	1	98	0	113	1
ASIC3	c.352G>A	0.466981	1	98	0	113	1
F5	c.292A>G	0.466981	1	98	0	113	1
CLVS1	c.151C>T	0.466981	1	98	0	113	1
DPYD	c.695C>T	0.466981	1	98	0	113	1
CRY2	c.1375C>T	0.466981	1	98	0	113	1
OPRM1	c.1165-3C>T	0.466981	1	98	0	113	1
CDHR2	c.3080C>T	0.466981	1	98	0	113	1
VN1R2	c.705G>A	0.466981	1	98	0	113	1
FER1L5	c.4984G>C	0.466981	1	98	0	113	1
CDK18	c.541G>A	0.466981	1	98	0	113	1
ZC2HC1C	c.409C>T	0.466981	1	98	0	113	1
MSANTD4	c.721delC	0.466981	1	98	0	113	1
PRKG1	c.1131C>T	0.466981	1	98	0	113	1
EXOC3	c.95A>T	0.466981	1	98	0	113	1
LMNTD1	c.581C>T	0.466981	1	98	0	113	1
PTCHD2	c.148C>T	0.466981	1	98	0	113	1
LRP2	c.11317C>T	0.466981	1	98	0	113	1
FGD2	c.556A>C	0.466981	1	98	0	113	1
HSPG2	c.8602C>T	0.466981	1	98	0	113	1
COL9A3	c.1913C>T	0.466981	1	98	0	113	1
HJURP	c.1288C>T	0.466981	1	98	0	113	1
SLC4A10	c.*20C>T	0.466981	1	98	0	113	1
KCNMA1	c.3652C>T	0.466981	1	98	0	113	1
CD244	c.55G>A	0.466981	1	98	0	113	1
PPP1R12C	c.1198C>T	0.466981	1	98	0	113	1
TIMM10B	c.136-1G>A	0.466981	1	98	0	113	1
ARHGEF18	c.3349+2T>C	0.466981	1	98	0	113	1
UNC5A	c.1258G>A	0.466981	1	98	0	113	1
HOOK1	c.169G>A	0.466981	1	98	0	113	1
ENPP7	c.511G>A	0.466981	1	98	0	113	1
RPN2	c.1105A>T	0.466981	1	98	0	113	1
FILIP1	c.2131C>T	0.466981	1	98	0	113	1
PCBP4	c.11C>T	0.466981	1	98	0	113	1
CYP17A1	c.673C>T	0.466981	1	98	0	113	1
ASIC2	c.556G>C	0.466981	1	98	0	113	1
BUB1B	c.1519G>A	0.466981	1	98	0	113	1
OLFML2A	c.1676C>T	0.466981	1	98	0	113	1
NLGN4X	c.2045G>A	0.466981	1	98	0	113	1
CSTF2		0.466981	1	98	0	113	1
ZMAT1	c.1786C>T	0.466981	1	98	0	113	1
FLG	c.3521G>A	0.466981	1	98	0	113	1
SAFB	c.626C>T	0.466981	1	98	0	113	1
CFAP70	c.2263C>T	0.466981	1	98	0	113	1
HEXB	c.874C>T	0.466981	1	98	0	113	1
C12orf56	c.1270G>A	0.466981	1	98	0	113	1
PAPPA2	c.995G>A	0.466981	1	98	0	113	1
OR10H3	c.572G>A	0.466981	1	98	0	113	1
ETNK1	c.536G>A	0.466981	1	98	0	113	1
BARX2	c.271C>T	0.466981	1	98	0	113	1
PRH2	c.190A>T	0.466981	1	98	0	113	1
PRKCZ	c.1342C>T	0.466981	1	98	0	113	1
VN1R10P	n.417A>T	0.466981	1	98	0	113	1
SLC9C2	c.281C>T	0.466981	1	98	0	113	1
TSIX	n.32288G>A	0.466981	1	98	0	113	1
DOK6	c.512A>T	0.466981	1	98	0	113	1
SULT1C3	c.421C>T	0.466981	1	98	0	113	1
RYR2	c.5791G>A	0.466981	1	98	0	113	1
DNMT3A	c.467C>T	0.466981	1	98	0	113	1
BTBD9	c.1641G>A	0.466981	1	98	0	113	1
PLEC	c.7183G>C	0.466981	1	98	0	113	1
LY6E	c.*62C>T	0.466981	1	98	0	113	1
SIDT1	c.1887G>A	0.466981	1	98	0	113	1
CXCL10	c.*81G>A	0.466981	1	98	0	113	1
SCN11A	c.2851C>T	0.466981	1	98	0	113	1
PCDHGB6	c.2191C>T	0.466981	1	98	0	113	1
PEG3	c.2665C>T	0.466981	1	98	0	113	1
FAS	c.-138G>A	0.466981	1	98	0	113	1
ADAMTS20	c.2527G>A	0.466981	1	98	0	113	1
SETD1A	c.1282C>T	0.466981	1	98	0	113	1
PIGW	c.1154T>C	0.466981	1	98	0	113	1
OR3A3	c.807G>A	0.466981	1	98	0	113	1
ICK	c.1583C>T	0.466981	1	98	0	113	1
MACF1	c.17729T>A	0.466981	1	98	0	113	1
CES3	c.1087G>A	0.466981	1	98	0	113	1
CSMD2	c.2320G>A	0.466981	1	98	0	113	1
ZNF777	c.1480G>A	0.466981	1	98	0	113	1
ROBO1	c.4054G>A	0.466981	1	98	0	113	1
MYH4	c.4871G>A	0.466981	1	98	0	113	1
DNAH5	c.8522C>T	0.466981	1	98	0	113	1
NUP210L	c.3937C>T	0.466981	1	98	0	113	1
NCKAP1	c.2860-1G>A	0.466981	1	98	0	113	1
DNAH5	c.12415C>T	0.466981	1	98	0	113	1
XKR3	c.127C>T	0.466981	1	98	0	113	1
ANK1	c.2083G>A	0.466981	1	98	0	113	1
KEAP1	c.389C>T	0.466981	1	98	0	113	1
PMEPA1	c.341G>C	0.466981	1	98	0	113	1
AOX1	c.1955C>T	0.466981	1	98	0	113	1
MYH2	c.16G>A	0.466981	1	98	0	113	1
NAPSB	n.407G>A	0.466981	1	98	0	113	1
A4GALT	c.580G>A	0.466981	1	98	0	113	1
BTNL2	c.1333G>A	0.466981	1	98	0	113	1
NPR2	c.1276C>T	0.466981	1	98	0	113	1
NOL4	c.1115G>A	0.466981	1	98	0	113	1
URGCP	c.419C>T	0.466981	1	98	0	113	1
ANO4	c.558-3C>T	0.466981	1	98	0	113	1
FAM73B	c.488A>C	0.466981	1	98	0	113	1
IGHV1-69	c.119C>T	0.466981	1	98	0	113	1
RNF219	c.854G>A	0.466981	1	98	0	113	1
NLRP10	c.1616C>T	0.466981	1	98	0	113	1
ZNF28	c.1019C>T	0.466981	1	98	0	113	1
MARK1	c.2258T>A	0.466981	1	98	0	113	1
OVCH1	c.88G>A	0.466981	1	98	0	113	1
RBM14	c.1772C>T	0.466981	1	98	0	113	1
EPHB2	c.278C>T	0.466981	1	98	0	113	1
CAPN13	c.1954G>A	0.466981	1	98	0	113	1
STAB1	c.4400C>T	0.466981	1	98	0	113	1
NLRP4	c.1251C>G	0.466981	1	98	0	113	1
ZBED9	c.2932G>A	0.466981	1	98	0	113	1
NOS1	c.*156C>T	0.466981	1	98	0	113	1
FLG	c.4025C>T	0.466981	1	98	0	113	1
FAM71A	c.1162G>A	0.466981	1	98	0	113	1
SLC16A9	c.1283T>C	0.466981	1	98	0	113	1
CD1E	c.-78G>A	0.466981	1	98	0	113	1
CHAC1	c.582C>A	0.466981	1	98	0	113	1
DGKG	c.1810G>A	0.466981	1	98	0	113	1
AQP2	c.-24G>A	0.466981	1	98	0	113	1
PROC	c.2T>G	0.466981	1	98	0	113	1
GALNTL5	c.616G>A	0.466981	1	98	0	113	1
FBXO40	c.817C>T	0.466981	1	98	0	113	1
MAGEE2	c.1282C>T	0.466981	1	98	0	113	1
KCNC2	c.1220G>A	0.466981	1	98	0	113	1
WDR35	c.-61_-60delCG	0.466981	1	98	0	113	1
CR2	c.290C>T	0.466981	1	98	0	113	1
EIF4G1	c.1033C>T	0.466981	1	98	0	113	1
SSH2	c.374G>T	0.466981	1	98	0	113	1
MAP7	c.821T>G	0.466981	1	98	0	113	1
IBSP	c.904G>A	0.466981	1	98	0	113	1
RFPL2	c.853G>A	0.466981	1	98	0	113	1
RET	c.3095G>A	0.466981	1	98	0	113	1
ZNF266	c.1601C>T	0.466981	1	98	0	113	1
EXOC1	c.1725-1G>A	0.466981	1	98	0	113	1
CNKSR1	c.853C>T	0.466981	1	98	0	113	1
SORCS1	c.*49C>T	0.466981	1	98	0	113	1
OR2AE1	c.142C>T	0.466981	1	98	0	113	1
ARMC6	c.731G>A	0.466981	1	98	0	113	1
LYPD6B	c.*175G>A	0.466981	1	98	0	113	1
TBC1D8B	c.2770G>A	0.466981	1	98	0	113	1
MUC17	c.3827G>A	0.466981	1	98	0	113	1
GDI1	c.454G>A	0.466981	1	98	0	113	1
CD163	c.509G>A	0.466981	1	98	0	113	1
NOTCH4	c.1906C>A	0.466981	1	98	0	113	1
PILRB	c.395G>A	0.466981	1	98	0	113	1
CDKAL1	c.1346C>T	0.466981	1	98	0	113	1
PARN	c.1451C>A	0.466981	1	98	0	113	1
STAB1	c.3775C>A	0.466981	1	98	0	113	1
GUF1	c.1150T>G	0.466981	1	98	0	113	1
SDK2	c.2074G>A	0.466981	1	98	0	113	1
ERAL1	c.923T>C	0.466981	1	98	0	113	1
2019-03-07	c.1523C>T	0.466981	1	98	0	113	1
PBX1	c.686G>A	0.466981	1	98	0	113	1
SLC31A1	c.320C>T	0.466981	1	98	0	113	1
MUC16	c.23819G>A	0.466981	1	98	0	113	1
DDI1	c.1147G>A	0.466981	1	98	0	113	1
FCRL6	c.412C>T	0.466981	1	98	0	113	1
GLDC	c.343G>A	0.466981	1	98	0	113	1
SI	c.5372G>A	0.466981	1	98	0	113	1
RP11-313I2.11		0.466981	1	98	0	113	1
LRP1B	c.5683G>A	0.466981	1	98	0	113	1
SLC14A2	c.1403C>T	0.466981	1	98	0	113	1
KLF6	c.13_15delCCC	0.466981	1	98	0	113	1
ATP12A	c.1780C>T	0.466981	1	98	0	113	1
GTF2IRD2P1	n.1512C>T	0.466981	1	98	0	113	1
PCDHGA10	c.1450G>A	0.466981	1	98	0	113	1
SLC22A25	c.972G>A	0.466981	1	98	0	113	1
PCDHA7	c.458C>T	0.466981	1	98	0	113	1
PEX19	c.-9G>A	0.466981	1	98	0	113	1
BLNK	c.*6G>A	0.466981	1	98	0	113	1
LIG1	c.*22G>T	0.466981	1	98	0	113	1
FGGY	c.1469C>T	0.466981	1	98	0	113	1
PRSS58	c.707A>T	0.466981	1	98	0	113	1
OR11G2	c.913G>A	0.466981	1	98	0	113	1
OR5R1	c.47G>A	0.466981	1	98	0	113	1
DGKB	c.1666G>A	0.466981	1	98	0	113	1
ZNF93	c.1742C>T	0.466981	1	98	0	113	1
KIR3DL2	c.1183G>A	0.466981	1	98	0	113	1
MYH15	c.3497G>A	0.466981	1	98	0	113	1
TLL1	c.641C>T	0.466981	1	98	0	113	1
LDB1	c.550C>A	0.466981	1	98	0	113	1
SPAG17	c.3643G>A	0.466981	1	98	0	113	1
IL18R1	c.1252G>A	0.466981	1	98	0	113	1
SYNPO	c.1597A>C	0.466981	1	98	0	113	1
KLRD1	c.49G>A	0.466981	1	98	0	113	1
TLL1	c.2695G>A	0.466981	1	98	0	113	1
MTRNR2L6		0.466981	1	98	0	113	1
KMT2A	c.9359C>T	0.466981	1	98	0	113	1
LMNB2	c.1387C>T	0.466981	1	98	0	113	1
PCF11	c.3032C>T	0.466981	1	98	0	113	1
ABCA7	c.2977C>T	0.466981	1	98	0	113	1
CPAMD8	c.593C>T	0.466981	1	98	0	113	1
LMOD1	c.166G>A	0.466981	1	98	0	113	1
ZNF521	c.673G>T	0.466981	1	98	0	113	1
CACNA1E	c.3725C>T	0.466981	1	98	0	113	1
RBM6	c.3334C>T	0.466981	1	98	0	113	1
CDH18	c.1558G>A	0.466981	1	98	0	113	1
ADCY8	c.1040G>A	0.466981	1	98	0	113	1
ARHGEF35	c.1352C>T	0.466981	1	98	0	113	1
MIR517B	n.45C>T	0.466981	1	98	0	113	1
GLP1R	c.*84G>A	0.466981	1	98	0	113	1
LBP	c.1241C>T	0.466981	1	98	0	113	1
ZNF804A	c.812C>T	0.466981	1	98	0	113	1
YLPM1	c.6301T>C	0.466981	1	98	0	113	1
PLK4	c.2423G>A	0.466981	1	98	0	113	1
CPED1	c.1759C>T	0.466981	1	98	0	113	1
EPHA4	c.*85C>T	0.466981	1	98	0	113	1
CUBN	c.8912C>T	0.466981	1	98	0	113	1
KRTAP10-3	c.313T>A	0.466981	1	98	0	113	1
PLAG1	c.1217C>T	0.466981	1	98	0	113	1
OTUD6A	c.826G>A	0.466981	1	98	0	113	1
SYCP1	c.2266C>T	0.466981	1	98	0	113	1
CCDC134	c.-9G>A	0.466981	1	98	0	113	1
GHDC	c.1027G>A	0.466981	1	98	0	113	1
KIF13A	c.4010C>T	0.466981	1	98	0	113	1
IKZF1	c.847C>T	0.466981	1	98	0	113	1
LMX1A	c.551G>A	0.466981	1	98	0	113	1
MUC16	c.8717C>T	0.466981	1	98	0	113	1
CES1	c.-31C>T	0.466981	1	98	0	113	1
MYH15	c.2573G>A	0.466981	1	98	0	113	1
MTOR	c.7270G>A	0.466981	1	98	0	113	1
STT3B	c.1238C>T	0.466981	1	98	0	113	1
TNRC6C	c.4142C>T	0.466981	1	98	0	113	1
GPI	c.684_685insGGAAGGTGAGGCTCAGCTCACGGAGCACAGC	0.466981	1	98	0	113	1
USP6	c.622G>A	0.466981	1	98	0	113	1
CCDC136	c.377C>T	0.466981	1	98	0	113	1
CD163L1	c.3067C>T	0.466981	1	98	0	113	1
RFPL3	c.223G>A	0.466981	1	98	0	113	1
UNC5B	c.404C>T	0.466981	1	98	0	113	1
RGPD3	c.5023G>A	0.466981	1	98	0	113	1
PTEN	c.456dupA	0.466981	1	98	0	113	1
ERCC2	c.1659T>G	0.466981	1	98	0	113	1
GPRIN3	c.1696C>T	0.466981	1	98	0	113	1
MUC16	c.4999G>A	0.466981	1	98	0	113	1
PAPOLG	c.2150C>T	0.466981	1	98	0	113	1
WDR90	c.1557-8C>T	0.466981	1	98	0	113	1
ELF2	c.3G>T	0.466981	1	98	0	113	1
NTF3	c.271G>A	0.466981	1	98	0	113	1
P2RY4	c.784C>T	0.466981	1	98	0	113	1
ZMIZ1	c.514G>A	0.466981	1	98	0	113	1
OBP2B	c.491G>A	0.466981	1	98	0	113	1
C15orf39	c.518C>T	0.466981	1	98	0	113	1
CA3	c.412G>A	0.466981	1	98	0	113	1
CIB2	c.236C>T	0.466981	1	98	0	113	1
DMGDH	c.937G>A	0.466981	1	98	0	113	1
HTR6	c.895C>G	0.466981	1	98	0	113	1
GALNTL6	c.33G>A	0.466981	1	98	0	113	1
SERPINI2	c.787G>A	0.466981	1	98	0	113	1
PRB4	c.416G>A	0.466981	1	98	0	113	1
USP41	c.326A>T	0.466981	1	98	0	113	1
DENND1A	c.373G>A	0.466981	1	98	0	113	1
GATA4	c.628G>A	0.466981	1	98	0	113	1
AASS	c.1124C>T	0.466981	1	98	0	113	1
NPAS4	c.1400C>T	0.466981	1	98	0	113	1
SLC22A9	c.339G>A	0.466981	1	98	0	113	1
ZNF577	c.1126C>T	0.466981	1	98	0	113	1
NAP1L4	c.701C>G	0.466981	1	98	0	113	1
EP400	c.1877C>T	0.466981	1	98	0	113	1
JMJD7-PLA2G4B	c.2828-3C>T	0.466981	1	98	0	113	1
AQP12A	c.88C>T	0.466981	1	98	0	113	1
MUSK	c.791G>A	0.466981	1	98	0	113	1
ZHX2	c.257C>T	0.466981	1	98	0	113	1
PGK2	c.830G>A	0.466981	1	98	0	113	1
ADAMTS18	c.961G>A	0.466981	1	98	0	113	1
TMEM138	c.*62G>A	0.466981	1	98	0	113	1
PCLO	c.6614G>A	0.466981	1	98	0	113	1
CFAP69	c.2818C>T	0.466981	1	98	0	113	1
UBXN8	c.596C>T	0.466981	1	98	0	113	1
OR52A4P		0.466981	1	98	0	113	1
MUC16	c.41528G>A	0.466981	1	98	0	113	1
C10orf120	c.-4G>A	0.466981	1	98	0	113	1
ING1	c.-29C>T	0.466981	1	98	0	113	1
USP9X	c.3985C>T	0.466981	1	98	0	113	1
ZNF804B	c.3781A>T	0.466981	1	98	0	113	1
MLIP	c.406G>A	0.466981	1	98	0	113	1
DSCR10	n.366G>A	0.466981	1	98	0	113	1
VEGFC	c.623C>T	0.466981	1	98	0	113	1
CSMD1	c.3158C>T	0.466981	1	98	0	113	1
SLC22A6	c.786C>G	0.466981	1	98	0	113	1
BCL11A	c.1103C>T	0.466981	1	98	0	113	1
ART1	c.229G>A	0.466981	1	98	0	113	1
GUCY2C	c.628G>A	0.466981	1	98	0	113	1
COL1A1	c.2776G>A	0.466981	1	98	0	113	1
APP	c.581A>G	0.466981	1	98	0	113	1
CYP19A1	c.10G>A	0.466981	1	98	0	113	1
EDN1	c.574G>A	0.466981	1	98	0	113	1
CACNA2D4	c.466G>A	0.466981	1	98	0	113	1
SLC30A9	c.929C>T	0.466981	1	98	0	113	1
LILRP2	n.991C>T	0.466981	1	98	0	113	1
TEKT5	c.-27T>G	0.466981	1	98	0	113	1
TTN	c.25571T>G	0.466981	1	98	0	113	1
AFF3	c.1132G>A	0.466981	1	98	0	113	1
IQCJ	c.353G>A	0.466981	1	98	0	113	1
NME8	c.967C>T	0.466981	1	98	0	113	1
SAMHD1	c.1411-2A>T	0.466981	1	98	0	113	1
OR4F15	c.278C>T	0.466981	1	98	0	113	1
DCAF4	c.908-1G>A	0.466981	1	98	0	113	1
NRD1	c.3386A>C	0.466981	1	98	0	113	1
SLC27A6	c.*69G>A	0.466981	1	98	0	113	1
DACT1	c.1061G>A	0.466981	1	98	0	113	1
KLHL13	c.1211G>A	0.466981	1	98	0	113	1
CDKN2AIP	c.*103_*104insACATA	0.466981	1	98	0	113	1
CCDC73	c.2564G>A	0.466981	1	98	0	113	1
RALGAPA1	c.5850G>A	0.466981	1	98	0	113	1
TTN	c.15599C>T	0.466981	1	98	0	113	1
PDZD2	c.8311G>A	0.466981	1	98	0	113	1
NCAN	c.2483C>T	0.466981	1	98	0	113	1
ADAM23	c.718G>A	0.466981	1	98	0	113	1
SGCG	c.204G>A	0.466981	1	98	0	113	1
CAPN2	c.338C>T	0.466981	1	98	0	113	1
PGAP3	c.*64C>T	0.466981	1	98	0	113	1
RPS19	c.280C>T	0.466981	1	98	0	113	1
PLEKHA4	c.208C>T	0.466981	1	98	0	113	1
NRXN1	c.1487G>A	0.466981	1	98	0	113	1
SPEG	c.8308G>A	0.466981	1	98	0	113	1
COL4A1	c.4399C>T	0.466981	1	98	0	113	1
GPATCH8	c.*52C>T	0.466981	1	98	0	113	1
PALLD	c.1853G>A	0.466981	1	98	0	113	1
FAM173B	c.190C>T	0.466981	1	98	0	113	1
CARD11	c.221-1G>A	0.466981	1	98	0	113	1
LIPG	c.581C>A	0.466981	1	98	0	113	1
TENM1	c.2828C>T	0.466981	1	98	0	113	1
CTD-2269E23.2	n.51G>A	0.466981	1	98	0	113	1
RP11-119F19.5	n.860C>T	0.466981	1	98	0	113	1
DRD5	c.1285G>A	0.466981	1	98	0	113	1
ADGRG4	c.1489G>A	0.466981	1	98	0	113	1
ADAM18	c.88C>T	0.466981	1	98	0	113	1
SGCA	c.649G>A	0.466981	1	98	0	113	1
SMCR8	c.869C>T	0.466981	1	98	0	113	1
HECTD4	c.11797C>T	0.466981	1	98	0	113	1
GNA13	c.982G>A	0.466981	1	98	0	113	1
HDGFRP2	c.643C>T	0.466981	1	98	0	113	1
WDR48	c.859C>T	0.466981	1	98	0	113	1
TAF4	c.1471C>T	0.466981	1	98	0	113	1
LIG4	c.-13C>T	0.466981	1	98	0	113	1
MAGEL2	c.3055C>G	0.466981	1	98	0	113	1
IGHV3-21	c.83G>A	0.466981	1	98	0	113	1
CEACAM3	c.*71G>A	0.466981	1	98	0	113	1
FAT3	c.2671C>T	0.466981	1	98	0	113	1
GFI1B	c.563G>A	0.466981	1	98	0	113	1
DMD	c.530G>A	0.466981	1	98	0	113	1
GFRAL	c.702G>A	0.466981	1	98	0	113	1
NTN4	c.778G>A	0.466981	1	98	0	113	1
SLC22A20	n.646C>T	0.466981	1	98	0	113	1
GNAI1	c.*40G>A	0.466981	1	98	0	113	1
MED13L	c.1658C>T	0.466981	1	98	0	113	1
PCDHB6		0.466981	1	98	0	113	1
KLHL31	c.574C>T	0.466981	1	98	0	113	1
LSG1	c.893C>T	0.466981	1	98	0	113	1
C1orf94	c.*24C>T	0.466981	1	98	0	113	1
ODF4	c.44G>A	0.466981	1	98	0	113	1
C8A	c.*64A>G	0.466981	1	98	0	113	1
TUSC3	c.926G>A	0.466981	1	98	0	113	1
DDX59	c.634G>A	0.466981	1	98	0	113	1
RGS3	c.2197G>A	0.466981	1	98	0	113	1
ANKRD28	c.911A>T	0.466981	1	98	0	113	1
C9orf84	c.2070C>G	0.466981	1	98	0	113	1
MXRA5	c.848C>T	0.466981	1	98	0	113	1
RBMXL1	c.485C>T	0.466981	1	98	0	113	1
C1orf168	c.1399G>A	0.466981	1	98	0	113	1
PTGDR	c.787C>T	0.466981	1	98	0	113	1
MATN1	c.1180G>A	0.466981	1	98	0	113	1
PLCE1	c.2944G>A	0.466981	1	98	0	113	1
PPIP5K1	c.*55C>T	0.466981	1	98	0	113	1
PCNT	c.4821G>T	0.466981	1	98	0	113	1
C12orf42	c.910C>T	0.466981	1	98	0	113	1
RUNX1T1	c.490G>A	0.466981	1	98	0	113	1
ZNF114	c.1228C>T	0.466981	1	98	0	113	1
PHKB	c.1180C>T	0.466981	1	98	0	113	1
PXDNL	c.4117C>T	0.466981	1	98	0	113	1
SPRR2F	c.*126C>T	0.466981	1	98	0	113	1
GPRC5C	c.1196C>T	0.466981	1	98	0	113	1
POSTN	c.1748A>G	0.466981	1	98	0	113	1
TUBGCP3	c.1708C>T	0.466981	1	98	0	113	1
ZNF878		0.466981	1	98	0	113	1
FLNB	c.6819A>C	0.466981	1	98	0	113	1
ITGAL	c.2508G>A	0.466981	1	98	0	113	1
METTL21C	c.118G>A	0.466981	1	98	0	113	1
USP38	c.*29A>T	0.466981	1	98	0	113	1
VAV3	c.1889G>A	0.466981	1	98	0	113	1
ABCC3	c.3914T>C	0.466981	1	98	0	113	1
RNF165	c.589C>T	0.466981	1	98	0	113	1
ALAS2	c.1319G>A	0.466981	1	98	0	113	1
RPP40	c.88C>T	0.466981	1	98	0	113	1
CCDC86	c.797C>T	0.466981	1	98	0	113	1
CRAMP1L	c.3061C>T	0.466981	1	98	0	113	1
RAB4B	c.334C>T	0.466981	1	98	0	113	1
PPM1D	c.799C>T	0.466981	1	98	0	113	1
OR51G2	c.181C>T	0.466981	1	98	0	113	1
PCNXL4	c.1885C>T	0.466981	1	98	0	113	1
CSMD2	c.3611C>T	0.466981	1	98	0	113	1
CYB5RL	c.101C>T	0.466981	1	98	0	113	1
VWA5A	c.136C>T	0.466981	1	98	0	113	1
KIAA1468	c.1881_1896+18delGGCACCTTACCTTCCTGTAAGATTGTCTTTTTTT	0.466981	1	98	0	113	1
ZNF229	c.1970G>A	0.466981	1	98	0	113	1
TGFB2	c.656G>A	0.466981	1	98	0	113	1
SLC12A5	c.*8G>A	0.466981	1	98	0	113	1
ZNF285	c.650C>T	0.466981	1	98	0	113	1
NTRK3	c.2269G>A	0.466981	1	98	0	113	1
OR51L1	c.697C>T	0.466981	1	98	0	113	1
ADGRD1	c.2228C>T	0.466981	1	98	0	113	1
CEBPA	c.901G>A	0.466981	1	98	0	113	1
DNAH10	c.5341G>A	0.466981	1	98	0	113	1
RP1	c.1729G>A	0.466981	1	98	0	113	1
CXCR5	c.902C>T	0.466981	1	98	0	113	1
CYP4X1	c.557C>T	0.466981	1	98	0	113	1
DNAH7	c.11707C>T	0.466981	1	98	0	113	1
RNF150	c.527G>A	0.466981	1	98	0	113	1
DCC	c.2368T>C	0.466981	1	98	0	113	1
ASPHD1	c.278G>A	0.466981	1	98	0	113	1
HUWE1	c.11725G>A	0.466981	1	98	0	113	1
LILRP2	n.1405C>T	0.466981	1	98	0	113	1
TFCP2	c.197C>T	0.466981	1	98	0	113	1
SCNN1A	c.1610C>T	0.466981	1	98	0	113	1
PLA2G2D	c.278G>A	0.466981	1	98	0	113	1
GPR149	c.1867G>A	0.466981	1	98	0	113	1
METTL2A	c.-25G>A	0.466981	1	98	0	113	1
ADGRL2	c.2846G>A	0.466981	1	98	0	113	1
PCBP3	c.767C>T	0.466981	1	98	0	113	1
DEFB119	c.10C>T	0.466981	1	98	0	113	1
DLK2	c.451G>A	0.466981	1	98	0	113	1
RPS6KA4	c.2050C>T	0.466981	1	98	0	113	1
ATP13A1	c.1460C>T	0.466981	1	98	0	113	1
DSEL	c.556G>A	0.466981	1	98	0	113	1
TECRL	c.1079C>T	0.466981	1	98	0	113	1
AXDND1	c.1931C>T	0.466981	1	98	0	113	1
ZFP42	c.871A>G	0.466981	1	98	0	113	1
SSMEM1	c.*56G>A	0.466981	1	98	0	113	1
ZNF876P	n.1187G>A	0.466981	1	98	0	113	1
HSPA13	c.1382C>T	0.466981	1	98	0	113	1
WDR6	c.1018C>T	0.466981	1	98	0	113	1
CLCNKB	c.418G>A	0.466981	1	98	0	113	1
SLC5A7	c.457A>T	0.466981	1	98	0	113	1
ZNF598	c.2360G>A	0.466981	1	98	0	113	1
CCDC105	c.646G>A	0.466981	1	98	0	113	1
SLIT3	c.4163C>T	0.466981	1	98	0	113	1
LRRC17	c.244G>A	0.466981	1	98	0	113	1
SDPR	c.1240G>A	0.466981	1	98	0	113	1
OR5M11	c.245C>T	0.466981	1	98	0	113	1
KIAA0319	c.1202G>A	0.466981	1	98	0	113	1
POLQ	c.1228C>T	0.466981	1	98	0	113	1
PELP1	c.2173C>T	0.466981	1	98	0	113	1
LRIG1	c.1225G>A	0.466981	1	98	0	113	1
CDK12	c.275A>C	0.466981	1	98	0	113	1
MTMR6	c.1096-2A>G	0.466981	1	98	0	113	1
KCNK18	c.811G>A	0.466981	1	98	0	113	1
PEX5L	c.535G>A	0.466981	1	98	0	113	1
MYO18B	c.1558C>T	0.466981	1	98	0	113	1
OR1S1	c.667C>T	0.466981	1	98	0	113	1
CHN1	c.920G>A	0.466981	1	98	0	113	1
POM121	c.1751C>T	0.466981	1	98	0	113	1
SERPINB5	c.463G>A	0.466981	1	98	0	113	1
ERN2	c.847T>C	0.466981	1	98	0	113	1
ZKSCAN1	c.706C>T	0.466981	1	98	0	113	1
MYOCD	c.2298G>C	0.466981	1	98	0	113	1
HIP1	c.2584T>C	0.466981	1	98	0	113	1
LMO7	c.1567G>A	0.466981	1	98	0	113	1
NRG1	c.236C>T	0.466981	1	98	0	113	1
[truncated: 234,258+ more rows]
